# Supplementary material for: Downregulated transcription in chromosomal domains of midbrain dopamine neurons linked to schizophrenia.
Source: Research Square preprint supplement (doi:10.21203/rs.3.rs-5354582/v1), 2024-11-08
Supplement: Supplementary file 1 [file 266ec5cbaf439ec58254c258.xlsx]

## Sheet: A
Dopa neurons vs Non-Neurons
	logFC	AveExpr	t	P.Value	adj.P.Val
ENSG00000280234	5.80734	5.37038	28.8685	6.84424e-36	9.61774e-32
ENSG00000077264	4.30214	5.99952	28.8218	7.50946e-36	9.61774e-32
ENSG00000101489	4.90918	5.37447	28.3193	1.92176e-35	1.64086e-31
ENSG00000214548	4.61832	10.7179	26.5424	6.13216e-34	3.92688e-30
ENSG00000147642	3.69478	4.85309	25.9882	1.88056e-33	9.63413e-30
ENSG00000078053	3.09997	5.98234	25.2554	8.5417e-33	3.64659e-29
ENSG00000144290	4.40017	6.52937	24.8977	3.23548e-32	1.18396e-28
ENSG00000170537	-3.15961	5.26587	-24.0699	1.06965e-31	3.42489e-28
ENSG00000176406	3.84375	6.96764	23.9775	1.30836e-31	3.72373e-28
ENSG00000081913	-3.45456	6.73771	-24.1221	1.99754e-31	4.94066e-28
ENSG00000133026	2.97723	7.37798	23.7568	2.1217e-31	4.94066e-28
ENSG00000204442	2.95136	4.86029	23.278	6.13323e-31	1.30919e-27
ENSG00000106078	-3.64123	6.67366	-22.98	1.1982e-30	2.36092e-27
ENSG00000139767	5.64993	4.18141	22.7953	1.821e-30	3.33177e-27
ENSG00000159176	-3.55788	6.4776	-22.6066	5.64212e-30	9.63486e-27
ENSG00000137494	2.92888	4.70946	21.8282	1.70546e-29	2.73033e-26
ENSG00000165379	3.75636	4.83242	21.9552	2.13782e-29	3.22119e-26
ENSG00000198010	4.93939	3.8965	21.6776	2.43359e-29	3.46313e-26
ENSG00000144218	2.33838	6.30181	21.8434	3.10198e-29	4.18195e-26
ENSG00000187672	2.78845	7.14659	21.6014	5.52445e-29	7.07543e-26
ENSG00000054356	5.25518	5.21277	21.2824	6.24196e-29	7.61371e-26
ENSG00000166206	3.7411	5.49193	26.2059	1.45867e-28	1.69836e-25
ENSG00000171714	3.09058	4.75567	20.8468	1.79125e-28	1.99491e-25
ENSG00000080823	2.09961	5.90148	20.7996	2.0103e-28	2.14557e-25
ENSG00000224078	2.46978	11.0798	28.8298	3.29016e-28	3.06111e-25
ENSG00000146592	-4.65629	5.96005	-20.8583	3.30904e-28	3.06111e-25
ENSG00000139433	-2.53917	5.16077	-20.5915	3.34948e-28	3.06111e-25
ENSG00000155093	3.35621	5.66018	20.7939	3.41514e-28	3.06111e-25
ENSG00000137942	2.82478	6.02233	20.5722	3.51271e-28	3.06111e-25
ENSG00000170271	-4.05587	4.97819	-20.5639	3.58514e-28	3.06111e-25
ENSG00000072832	2.86347	5.22486	20.5496	3.71404e-28	3.06887e-25
ENSG00000102900	2.29229	7.4507	20.5458	3.87091e-28	3.09854e-25
ENSG00000138759	5.73202	5.0025	20.5049	4.14732e-28	3.2192e-25
ENSG00000166348	-3.07507	8.47444	-20.2547	7.71718e-28	5.81399e-25
ENSG00000143502	2.72715	4.76185	20.1592	9.79645e-28	7.1696e-25
ENSG00000186487	3.81262	7.3209	20.1323	1.04807e-27	7.45e-25
ENSG00000188158	3.71647	4.20287	20.1217	1.07613e-27	7.45e-25
ENSG00000273079	3.99391	6.5854	26.6595	1.18069e-27	7.95879e-25
ENSG00000196876	3.23897	7.3854	30.8636	1.28402e-27	8.40041e-25
ENSG00000138758	2.42125	5.99674	25.3829	1.3118e-27	8.40041e-25
ENSG00000158301	2.46163	4.5378	20.2173	1.41642e-27	8.7228e-25
ENSG00000185737	2.72761	5.76186	20.0085	1.43025e-27	8.7228e-25
ENSG00000147459	-4.67257	8.05196	-19.9056	1.8537e-27	1.10424e-24
ENSG00000006432	4.07208	5.12998	30.8542	4.23957e-27	2.46811e-24
ENSG00000136928	4.52566	5.27017	24.5967	5.05987e-27	2.84032e-24
ENSG00000070759	-4.37774	3.76047	-19.5035	5.16067e-27	2.84032e-24
ENSG00000124140	5.59616	5.94815	19.4997	5.2116e-27	2.84032e-24
ENSG00000230084	-3.75866	2.60153	-19.5862	7.52236e-27	4.01428e-24
ENSG00000106772	-3.18928	9.14434	-19.2931	8.87323e-27	4.63852e-24
ENSG00000144749	-3.07318	5.54869	-19.2296	1.04603e-26	5.35881e-24
ENSG00000101746	2.54545	5.25692	19.3666	1.076e-26	5.40429e-24
ENSG00000186340	-3.68903	5.09744	-19.1937	1.14797e-26	5.65484e-24
ENSG00000102934	-5.69761	4.1598	-19.1759	1.20233e-26	5.79104e-24
ENSG00000006740	3.38081	5.37234	29.7998	1.22083e-26	5.79104e-24
ENSG00000166448	4.12419	5.1166	19.1509	1.2831e-26	5.97573e-24
ENSG00000164690	4.39458	1.89545	19.0938	1.48871e-26	6.80952e-24
ENSG00000198216	3.53061	7.08654	18.9825	1.99119e-26	8.94813e-24
ENSG00000075340	4.17351	6.10291	27.0637	2.41819e-26	1.06796e-23
ENSG00000165995	2.78522	5.11016	18.9751	3.4145e-26	1.4744e-23
ENSG00000072858	4.88899	4.16458	26.0687	3.45361e-26	1.4744e-23
ENSG00000184014	-1.62187	7.77246	-18.7435	3.73271e-26	1.52554e-23
ENSG00000092621	-4.44665	3.91142	-18.7416	3.75152e-26	1.52554e-23
ENSG00000139182	4.11088	6.11395	28.7967	3.75206e-26	1.52554e-23
ENSG00000250305	3.52008	5.54726	26.4712	4.27052e-26	1.70921e-23
ENSG00000135929	-3.15351	5.01972	-18.8266	5.27037e-26	2.07693e-23
ENSG00000163053	3.2713	2.78986	18.6624	6.11725e-26	2.37414e-23
ENSG00000204677	5.40699	3.49579	18.5196	6.76157e-26	2.58504e-23
ENSG00000176485	-3.37548	5.13449	-18.5103	6.93108e-26	2.61088e-23
ENSG00000196975	-2.41076	4.28247	-18.484	7.43347e-26	2.75954e-23
ENSG00000165478	-5.56679	5.39438	-18.4661	7.79875e-26	2.85379e-23
ENSG00000168917	2.86176	3.35234	18.5596	8.35231e-26	2.98744e-23
ENSG00000169641	1.94178	5.84991	18.6298	8.39726e-26	2.98744e-23
ENSG00000021300	-4.29053	5.35815	-18.3882	9.60419e-26	3.37002e-23
ENSG00000162105	4.34263	5.66352	25.6999	1.2998e-25	4.49925e-23
ENSG00000151136	4.62769	5.15252	18.247	1.40313e-25	4.79214e-23
ENSG00000252396	5.97557	-0.65644	18.2205	1.50732e-25	5.08027e-23
ENSG00000134709	4.71634	3.46072	24.0219	1.58774e-25	5.25034e-23
ENSG00000065809	-4.38228	5.9951	-18.1986	1.59878e-25	5.25034e-23
ENSG00000184144	-3.48353	8.83891	-18.1883	1.64407e-25	5.33075e-23
ENSG00000186417	-4.25015	6.49837	-18.3636	1.73903e-25	5.56815e-23
ENSG00000141447	-2.33033	6.87661	-18.1524	1.81138e-25	5.7282e-23
ENSG00000089041	-4.27365	6.41196	-18.1309	1.91974e-25	5.99685e-23
ENSG00000101049	-3.16834	4.82418	-18.1031	2.06995e-25	6.38816e-23
ENSG00000184368	3.55019	5.62582	18.097	2.10442e-25	6.41721e-23
ENSG00000092445	-3.39033	6.16411	-18.2825	2.15108e-25	6.48234e-23
ENSG00000139629	-5.29354	3.92001	-18.073	2.24562e-25	6.57939e-23
ENSG00000078018	2.58269	8.65778	18.2604	2.26195e-25	6.57939e-23
ENSG00000176771	-3.99358	7.0196	-18.0667	2.28413e-25	6.57939e-23
ENSG00000136854	2.41386	7.83422	27.1889	2.28603e-25	6.57939e-23
ENSG00000171435	3.75283	6.11024	26.0792	2.50358e-25	7.0509e-23
ENSG00000150867	-3.68661	7.3089	-18.0379	2.51647e-25	7.0509e-23
ENSG00000124194	3.83387	2.46244	18.0272	2.54312e-25	7.0509e-23
ENSG00000198625	-1.38979	8.08634	-18.2127	2.55996e-25	7.0509e-23
ENSG00000185532	3.77726	4.40817	22.4243	2.59182e-25	7.0627e-23
ENSG00000168016	4.47801	7.25097	25.6448	2.65725e-25	7.1648e-23
ENSG00000255176	-3.39757	4.30585	-18.006	2.69355e-25	7.187e-23
ENSG00000188211	3.55535	5.01767	25.6739	2.91983e-25	7.71046e-23
ENSG00000115468	-4.52523	4.50199	-17.9618	3.03767e-25	7.93598e-23
ENSG00000156802	2.22021	4.53461	17.9577	3.07212e-25	7.93598e-23
ENSG00000139998	3.46518	4.73303	22.7848	3.09818e-25	7.93598e-23
ENSG00000109686	-2.54018	6.68398	-17.9237	3.37013e-25	8.54711e-23
ENSG00000233452	3.56933	4.42012	31.344	3.46622e-25	8.64267e-23
ENSG00000133101	5.49106	-0.0582731	17.9107	3.4917e-25	8.64267e-23
ENSG00000243175	-4.10372	3.12422	-17.9089	3.50903e-25	8.64267e-23
ENSG00000114166	-2.14736	6.43074	-21.8973	3.66027e-25	8.92932e-23
ENSG00000100604	4.60429	4.55327	17.8844	3.75222e-25	9.06728e-23
ENSG00000186094	3.51058	4.02018	23.9029	4.09282e-25	9.7979e-23
ENSG00000163618	3.57087	8.22659	23.1574	4.28379e-25	1.01601e-22
ENSG00000167723	-2.98376	4.78098	-20.8429	4.37741e-25	1.02869e-22
ENSG00000092871	-3.13736	6.27885	-17.8089	4.61324e-25	1.07426e-22
ENSG00000172340	-2.52557	3.04395	-17.7666	5.17993e-25	1.18627e-22
ENSG00000136867	-4.10423	4.97729	-17.7641	5.2163e-25	1.18627e-22
ENSG00000119698	3.07781	4.49313	29.7737	5.23323e-25	1.18627e-22
ENSG00000130540	3.99115	4.84043	23.0807	6.57791e-25	1.47801e-22
ENSG00000146352	4.55291	3.8873	24.6977	6.99664e-25	1.55843e-22
ENSG00000175352	4.35701	3.25053	22.7981	7.99519e-25	1.76549e-22
ENSG00000145794	-4.24626	5.85733	-17.5914	8.39084e-25	1.83702e-22
ENSG00000159023	3.08526	6.6607	23.7715	8.5574e-25	1.85761e-22
ENSG00000166033	-3.05331	6.00745	-22.2557	9.61817e-25	2.07033e-22
ENSG00000141404	2.98946	4.32637	23.8207	9.72627e-25	2.07615e-22
ENSG00000162599	-2.10069	5.75929	-17.6723	1.12382e-24	2.37906e-22
ENSG00000204381	-4.54058	2.67912	-17.4714	1.17016e-24	2.45685e-22
ENSG00000092529	-4.04089	5.09171	-17.4676	1.18246e-24	2.4625e-22
ENSG00000067842	4.90138	5.03606	25.0465	1.21989e-24	2.51996e-22
ENSG00000141540	-5.47982	5.82605	-17.4387	1.28127e-24	2.62558e-22
ENSG00000132199	-2.59508	7.43005	-17.4323	1.30427e-24	2.65151e-22
ENSG00000132938	5.26082	4.02159	30.5907	1.34504e-24	2.71286e-22
ENSG00000235888	3.81833	2.6456	17.4607	1.51076e-24	3.02329e-22
ENSG00000163624	3.65549	3.25717	24.2236	1.56556e-24	3.10866e-22
ENSG00000183077	-3.47433	5.03415	-17.5092	1.74929e-24	3.43358e-22
ENSG00000111961	-2.29873	7.34969	-17.3256	1.756e-24	3.43358e-22
ENSG00000158445	2.71085	5.37922	17.2985	1.89394e-24	3.67524e-22
ENSG00000174456	-2.0576	5.6214	-22.5537	1.9319e-24	3.72072e-22
ENSG00000060709	3.33075	6.03646	17.4384	2.02269e-24	3.8665e-22
ENSG00000100678	2.67678	5.47068	17.2705	2.04827e-24	3.88641e-22
ENSG00000130147	-2.88328	5.12212	-17.4345	2.13223e-24	4.01597e-22
ENSG00000166912	-2.8825	6.35125	-17.2529	2.15176e-24	4.02316e-22
ENSG00000168297	-3.5108	8.47281	-21.5193	2.39729e-24	4.44975e-22
ENSG00000249896	2.47729	1.86414	17.2113	2.41768e-24	4.45531e-22
ENSG00000103184	-4.48553	6.40901	-17.3685	2.56292e-24	4.68923e-22
ENSG00000072134	-2.54995	7.15753	-22.2823	2.73584e-24	4.97011e-22
ENSG00000183960	-4.39026	6.42236	-17.1523	2.85384e-24	5.14797e-22
ENSG00000176884	6.20195	6.581	17.1481	2.88769e-24	5.17261e-22
ENSG00000103089	-5.90541	4.24453	-17.1156	3.16342e-24	5.62715e-22
ENSG00000171316	-2.86602	8.29167	-17.0965	3.33834e-24	5.86363e-22
ENSG00000041515	3.41555	4.30643	23.0915	3.34214e-24	5.86363e-22
ENSG00000173786	-3.98694	7.54899	-17.0786	3.51188e-24	6.11951e-22
ENSG00000233175	4.57204	1.27446	17.2358	3.60897e-24	6.24619e-22
ENSG00000154928	2.92234	4.80945	29.0488	3.71289e-24	6.38293e-22
ENSG00000109458	-4.25181	7.14868	-17.0401	3.91406e-24	6.68391e-22
ENSG00000163491	3.81684	4.23746	22.5511	3.95259e-24	6.705e-22
ENSG00000099282	-4.44505	4.51649	-17.0309	4.01709e-24	6.76959e-22
ENSG00000154678	-3.87958	6.81111	-17.0265	4.0679e-24	6.81041e-22
ENSG00000153253	2.59528	6.55757	17.1755	4.12065e-24	6.85392e-22
ENSG00000118322	-5.13421	5.56648	-17.0138	4.217e-24	6.96892e-22
ENSG00000134874	2.20739	6.93438	17.1657	4.28268e-24	7.0321e-22
ENSG00000136960	-4.89603	7.00825	-16.9996	4.38963e-24	7.16181e-22
ENSG00000166446	2.44758	3.98818	16.9766	4.68416e-24	7.59397e-22
ENSG00000115935	-4.0277	5.0116	-17.1356	4.9133e-24	7.91536e-22
ENSG00000144583	5.44262	1.68356	17.0659	5.31126e-24	8.50299e-22
ENSG00000182732	3.69601	5.37119	17.0418	5.5303e-24	8.79867e-22
ENSG00000135454	4.69094	4.35154	23.9511	5.83363e-24	9.22397e-22
ENSG00000157445	2.87342	6.03374	17.0464	5.87602e-24	9.234e-22
ENSG00000119946	4.23336	4.19702	23.2359	7.009e-24	1.09473e-21
ENSG00000183696	3.46698	5.97104	26.9731	7.83048e-24	1.21311e-21
ENSG00000123191	2.53193	5.1368	27.5256	7.86163e-24	1.21311e-21
ENSG00000064393	-2.48487	8.38004	-21.3288	8.2539e-24	1.26601e-21
ENSG00000178171	5.72313	2.51057	16.8405	8.32716e-24	1.26964e-21
ENSG00000253230	4.56373	6.89067	22.5002	9.47832e-24	1.42748e-21
ENSG00000119121	-4.27098	4.67539	-16.7288	9.4799e-24	1.42748e-21
ENSG00000133985	3.43369	2.40775	16.727	9.52952e-24	1.42748e-21
ENSG00000145247	3.59924	2.10275	16.6947	1.04524e-23	1.55662e-21
ENSG00000132932	3.87296	6.67383	25.238	1.06989e-23	1.58412e-21
ENSG00000259234	6.2841	0.59412	16.6827	1.08182e-23	1.59257e-21
ENSG00000117461	2.55491	3.16107	16.7856	1.19486e-23	1.74894e-21
ENSG00000130032	5.26746	2.94643	24.3148	1.20931e-23	1.76003e-21
ENSG00000121957	-3.78073	5.06265	-16.6195	1.29662e-23	1.87644e-21
ENSG00000135931	2.47257	4.7485	23.5782	1.30912e-23	1.88389e-21
ENSG00000130363	2.18313	4.59362	22.0526	1.31814e-23	1.88627e-21
ENSG00000197381	3.18419	5.81772	21.6476	1.34109e-23	1.90845e-21
ENSG00000155111	-2.55881	5.93881	-23.2258	1.39951e-23	1.98058e-21
ENSG00000155158	3.12443	4.86196	28.5936	1.5193e-23	2.13829e-21
ENSG00000162944	-5.42468	4.42522	-16.5618	1.53083e-23	2.14274e-21
ENSG00000140323	3.92594	4.13865	22.0459	1.61069e-23	2.22532e-21
ENSG00000175155	-2.25973	7.03148	-21.6274	1.61304e-23	2.22532e-21
ENSG00000122694	-3.60472	2.46297	-16.543	1.61589e-23	2.22532e-21
ENSG00000104067	-1.92181	8.38474	-16.5254	1.70017e-23	2.32887e-21
ENSG00000108639	-3.29236	3.89061	-16.5189	1.7322e-23	2.36012e-21
ENSG00000196814	-1.89346	7.25392	-16.517	1.74144e-23	2.36016e-21
ENSG00000152689	-5.05447	4.78096	-16.4739	1.97256e-23	2.65932e-21
ENSG00000155858	2.36056	3.38378	22.5922	2.03353e-23	2.72717e-21
ENSG00000112679	-1.80983	4.99767	-16.4583	2.06326e-23	2.74646e-21
ENSG00000105784	3.97598	3.18155	27.9985	2.06936e-23	2.74646e-21
ENSG00000184221	-5.14198	4.10615	-16.4548	2.08436e-23	2.75211e-21
ENSG00000135926	-3.41129	4.03404	-16.4452	2.14264e-23	2.81455e-21
ENSG00000258536	4.43281	-0.385419	16.606	2.16667e-23	2.83159e-21
ENSG00000069966	2.72917	5.69586	23.1166	2.236e-23	2.90736e-21
ENSG00000099204	2.59625	6.41725	16.5344	2.53774e-23	3.28304e-21
ENSG00000188706	-2.46506	5.93638	-24.7053	2.56286e-23	3.29887e-21
ENSG00000073417	-2.82468	7.70175	-21.4576	2.79276e-23	3.57682e-21
ENSG00000188042	2.89234	3.83967	16.4711	2.8946e-23	3.68881e-21
ENSG00000243516	5.1961	-1.00482	16.3289	3.00152e-23	3.79789e-21
ENSG00000158220	3.54804	4.73947	22.7273	3.00984e-23	3.79789e-21
ENSG00000285940	5.06684	0.586945	16.465	3.06989e-23	3.83587e-21
ENSG00000135423	4.66117	2.88634	22.7118	3.0699e-23	3.83587e-21
ENSG00000147724	2.66584	6.60976	19.9661	3.09555e-23	3.84915e-21
ENSG00000259462	-2.92142	4.45797	-16.3114	3.15874e-23	3.90875e-21
ENSG00000080815	-2.48983	7.47751	-19.8479	3.28935e-23	4.05081e-21
ENSG00000010292	-1.50078	5.27229	-16.4418	3.42295e-23	4.19515e-21
ENSG00000109099	-4.23677	4.34938	-16.4417	3.44128e-23	4.19754e-21
ENSG00000162407	-3.34018	3.72455	-16.2703	3.55942e-23	4.32107e-21
ENSG00000102221	-1.57727	3.79441	-16.2686	3.57777e-23	4.32285e-21
ENSG00000267799	4.139	-0.135496	16.2494	3.78365e-23	4.55014e-21
ENSG00000171766	-3.95458	6.15351	-16.2435	3.84867e-23	4.60672e-21
ENSG00000125354	1.9312	5.28702	16.2291	4.01346e-23	4.78161e-21
ENSG00000182158	-1.48466	5.57478	-16.2253	4.05837e-23	4.81274e-21
ENSG00000150760	-5.33225	6.42402	-16.2224	4.09296e-23	4.83139e-21
ENSG00000267651	5.05894	-0.460628	16.204	4.31887e-23	5.07468e-21
ENSG00000279727	4.49584	-0.204205	16.1878	4.52848e-23	5.28641e-21
ENSG00000174482	6.14193	2.32976	16.2687	4.54035e-23	5.28641e-21
ENSG00000160716	3.6528	3.54591	25.9838	4.57491e-23	5.30254e-21
ENSG00000092421	-2.62417	7.36857	-16.3337	4.61394e-23	5.32369e-21
ENSG00000228794	1.71907	4.68196	18.9324	4.78399e-23	5.49515e-21
ENSG00000136859	-4.19151	3.53635	-16.1616	4.88831e-23	5.58992e-21
ENSG00000108381	-6.22611	4.60976	-16.1588	4.92931e-23	5.61175e-21
ENSG00000160218	-1.46512	6.73465	-20.1968	5.10002e-23	5.7804e-21
ENSG00000120690	-3.71632	3.79023	-16.1275	5.4011e-23	6.09468e-21
ENSG00000286214	2.92608	6.78896	16.1244	5.45171e-23	6.10249e-21
ENSG00000143772	-4.31508	6.02827	-16.1241	5.45567e-23	6.10249e-21
ENSG00000286110	3.00349	3.2078	21.4984	5.4938e-23	6.11842e-21
ENSG00000079156	3.2788	6.18111	20.7602	5.57864e-23	6.18601e-21
ENSG00000117115	-4.50355	6.38426	-16.114	5.62036e-23	6.20541e-21
ENSG00000225783	4.21663	8.65518	24.1862	5.73966e-23	6.30993e-21
ENSG00000183230	-5.89077	4.95917	-16.0978	5.89315e-23	6.45098e-21
ENSG00000155052	3.44479	6.26428	20.0161	6.15259e-23	6.70632e-21
ENSG00000128578	3.2719	4.86983	21.7639	6.21957e-23	6.7506e-21
ENSG00000117707	-3.68975	5.25361	-16.0645	6.4986e-23	7.02369e-21
ENSG00000101333	3.32787	5.98663	24.3	6.52988e-23	7.02785e-21
ENSG00000104723	3.53794	3.86589	22.4938	6.91376e-23	7.40987e-21
ENSG00000122733	4.50358	3.58732	21.0266	6.99272e-23	7.46327e-21
ENSG00000139174	3.23951	4.74675	20.2548	7.38621e-23	7.81955e-21
ENSG00000100592	2.10511	6.43228	23.9808	7.43443e-23	7.81955e-21
ENSG00000157087	3.4957	7.36433	20.5291	7.44807e-23	7.81955e-21
ENSG00000141934	-5.26247	3.7035	-16.018	7.44865e-23	7.81955e-21
ENSG00000111328	-1.74089	3.94129	-16.015	7.51464e-23	7.85664e-21
ENSG00000237289	5.80179	3.76154	23.8375	7.62382e-23	7.93838e-21
ENSG00000140750	-1.45975	6.80673	-19.2622	7.69754e-23	7.98269e-21
ENSG00000091513	-4.72951	9.39033	-15.9861	8.18313e-23	8.45205e-21
ENSG00000028116	-4.65007	3.276	-16.1349	8.22373e-23	8.45988e-21
ENSG00000158859	-5.35977	5.00271	-15.9553	8.96002e-23	9.18043e-21
ENSG00000231133	4.38385	-1.55962	15.9456	9.21956e-23	9.40873e-21
ENSG00000169247	-5.54085	5.75243	-15.9431	9.28778e-23	9.44073e-21
ENSG00000126803	-4.21874	5.64734	-15.929	9.68277e-23	9.80333e-21
ENSG00000166368	4.96515	-1.08389	16.0777	9.8292e-23	9.9124e-21
ENSG00000197106	4.98884	4.28926	15.9217	9.89293e-23	9.93754e-21
ENSG00000196663	-1.99185	6.7871	-22.0424	1.01432e-22	1.01492e-20
ENSG00000281100	4.34616	0.791418	16.0473	1.04113e-22	1.03768e-20
ENSG00000135678	-5.13106	3.76129	-15.8874	1.095e-22	1.08714e-20
ENSG00000166676	2.60656	4.4548	15.8738	1.13974e-22	1.12462e-20
ENSG00000158715	-5.00764	4.56522	-15.8733	1.14152e-22	1.12462e-20
ENSG00000163637	2.12197	6.56172	28.8366	1.20038e-22	1.17807e-20
ENSG00000132669	-3.18022	5.73462	-15.8344	1.28087e-22	1.25227e-20
ENSG00000136531	3.30839	7.28026	24.0043	1.28708e-22	1.25356e-20
ENSG00000231840	-4.81128	3.17696	-15.8275	1.30759e-22	1.26871e-20
ENSG00000149575	2.72262	4.50132	20.0801	1.32295e-22	1.27877e-20
ENSG00000163251	-3.2829	2.66612	-15.8109	1.37322e-22	1.32045e-20
ENSG00000011426	-4.93095	6.64738	-15.8102	1.37638e-22	1.32045e-20
ENSG00000184611	5.6938	2.12752	22.0357	1.38499e-22	1.32375e-20
ENSG00000259199	4.53822	-1.83433	15.8048	1.39866e-22	1.33185e-20
ENSG00000182957	-2.12507	6.16348	-15.7909	1.4574e-22	1.37992e-20
ENSG00000204655	-5.60499	6.98868	-15.7903	1.45992e-22	1.37992e-20
ENSG00000144791	-2.8951	4.31383	-15.9335	1.49063e-22	1.40178e-20
ENSG00000046889	-2.90258	7.55011	-15.7825	1.49399e-22	1.40178e-20
ENSG00000168778	2.64111	4.05307	23.5645	1.49959e-22	1.40189e-20
ENSG00000162989	4.16673	3.59781	20.3003	1.57293e-22	1.46511e-20
ENSG00000135953	2.20452	3.1035	18.1017	1.63777e-22	1.51998e-20
ENSG00000184305	2.99543	5.13429	20.6469	1.66886e-22	1.54324e-20
ENSG00000196914	1.69823	7.83823	20.5237	1.74097e-22	1.60414e-20
ENSG00000214595	2.74773	6.58711	26.3878	1.83755e-22	1.68705e-20
ENSG00000107863	-2.02812	9.75739	-19.1771	1.88959e-22	1.72609e-20
ENSG00000150656	-5.72407	6.53437	-15.7029	1.89355e-22	1.72609e-20
ENSG00000162706	3.18763	5.66324	20.4318	1.90722e-22	1.73008e-20
ENSG00000129159	4.8881	5.19679	24.8406	1.91143e-22	1.73008e-20
ENSG00000112893	-3.28446	8.22887	-15.8255	2.03379e-22	1.83435e-20
ENSG00000171840	-5.74305	1.94387	-15.669	2.09434e-22	1.88233e-20
ENSG00000116254	6.3363	5.99437	21.1702	2.1363e-22	1.91333e-20
ENSG00000187764	-2.58538	8.60773	-15.7997	2.16182e-22	1.92944e-20
ENSG00000197892	-3.16077	8.00031	-19.2509	2.17982e-22	1.93876e-20
ENSG00000112186	3.3741	3.13334	20.0916	2.31446e-22	2.05002e-20
ENSG00000230461	-2.99423	2.62123	-15.6346	2.32093e-22	2.05002e-20
ENSG00000110427	4.08613	5.36714	20.8129	2.33144e-22	2.0515e-20
ENSG00000157064	3.38716	4.74112	21.3423	2.33863e-22	2.0515e-20
ENSG00000128739	2.23074	5.55074	22.891	2.51527e-22	2.19893e-20
ENSG00000273706	5.90245	0.76025	15.6031	2.55011e-22	2.22181e-20
ENSG00000201326	5.59133	-0.870731	21.86	2.63077e-22	2.28432e-20
ENSG00000164627	-2.94535	5.55323	-19.9558	2.69192e-22	2.32815e-20
ENSG00000068615	3.07498	4.37639	21.16	2.69944e-22	2.32815e-20
ENSG00000254377	5.3362	4.72486	19.1011	2.846e-22	2.44632e-20
ENSG00000156515	2.36409	6.08333	19.0123	2.86904e-22	2.45787e-20
ENSG00000120645	5.32041	4.32767	22.4595	2.9545e-22	2.52265e-20
ENSG00000143409	-3.22485	5.27153	-15.6898	3.04501e-22	2.59129e-20
ENSG00000240694	3.41183	5.56795	20.1488	3.11416e-22	2.64136e-20
ENSG00000235834	4.80431	-0.144096	15.5325	3.15125e-22	2.664e-20
ENSG00000156486	5.82607	-0.0310744	15.5304	3.17038e-22	2.67136e-20
ENSG00000228624	-2.61336	4.03365	-19.0402	3.20291e-22	2.68992e-20
ENSG00000137177	-2.40921	7.50318	-19.3816	3.36952e-22	2.82059e-20
ENSG00000187772	5.07897	0.87138	19.6415	3.38959e-22	2.82815e-20
ENSG00000029534	4.7534	5.37463	26.6478	3.5167e-22	2.92468e-20
ENSG00000174607	-4.68973	5.75748	-15.4928	3.5502e-22	2.94299e-20
ENSG00000075651	-3.22885	6.46119	-15.6336	3.5835e-22	2.96101e-20
ENSG00000155849	-2.48646	7.98055	-19.9356	3.59912e-22	2.96436e-20
ENSG00000151067	3.28826	6.86953	22.9053	3.69004e-22	3.0295e-20
ENSG00000148120	-1.83902	7.80204	-20.5231	3.82168e-22	3.12755e-20
ENSG00000202499	5.79751	-0.694604	22.3734	4.18985e-22	3.41392e-20
ENSG00000106976	3.8432	7.55431	23.2925	4.19827e-22	3.41392e-20
ENSG00000170775	-4.31299	5.53874	-18.1066	4.23482e-22	3.43275e-20
ENSG00000110786	5.43694	4.56929	22.4988	4.26249e-22	3.44428e-20
ENSG00000124920	-5.34007	7.50572	-15.4285	4.30697e-22	3.46927e-20
ENSG00000157856	3.93581	1.42847	15.4068	4.59756e-22	3.69174e-20
ENSG00000188343	2.81868	3.69576	18.1374	4.69178e-22	3.75562e-20
ENSG00000173253	-4.8582	1.63633	-15.382	4.95489e-22	3.95388e-20
ENSG00000204588	5.61596	-0.612173	20.6464	4.97874e-22	3.96057e-20
ENSG00000169180	-1.51348	7.46201	-15.5161	5.04049e-22	3.99728e-20
ENSG00000169398	-1.9359	9.21335	-18.7355	5.21576e-22	4.12351e-20
ENSG00000139537	4.11847	0.771817	15.4823	5.44188e-22	4.288e-20
ENSG00000148408	4.22761	6.61835	24.8459	5.4573e-22	4.288e-20
ENSG00000066084	-1.6296	8.37259	-19.2641	5.53166e-22	4.33314e-20
ENSG00000101098	4.3446	2.75579	19.9152	5.68098e-22	4.43653e-20
ENSG00000181754	2.83663	3.94353	17.573	5.74556e-22	4.47333e-20
ENSG00000155324	-4.93942	4.31424	-15.3318	5.76605e-22	4.47568e-20
ENSG00000183196	-3.96131	4.34694	-15.33	5.79826e-22	4.48708e-20
ENSG00000125966	4.32723	3.20799	20.4417	5.9053e-22	4.55615e-20
ENSG00000152556	2.41076	5.95121	19.7787	5.98382e-22	4.60287e-20
ENSG00000116793	2.66982	5.70459	29.1438	6.16998e-22	4.73186e-20
ENSG00000158286	3.8953	4.86707	22.6911	6.27468e-22	4.79779e-20
ENSG00000081026	2.40103	5.92872	27.352	6.3077e-22	4.80708e-20
ENSG00000100320	1.85347	7.16792	24.6389	6.32436e-22	4.80708e-20
ENSG00000189212	5.07299	2.82738	19.703	6.39003e-22	4.84e-20
ENSG00000129521	-2.69051	4.27451	-15.4378	6.40546e-22	4.84e-20
ENSG00000172548	-5.17507	2.99127	-15.2912	6.51957e-22	4.90256e-20
ENSG00000223797	-2.77146	2.72768	-19.3572	6.52653e-22	4.90256e-20
ENSG00000181449	-4.25679	5.72082	-15.2826	6.69291e-22	5.00086e-20
ENSG00000199453	5.62861	-0.220591	20.3028	6.70986e-22	5.00086e-20
ENSG00000279678	6.01624	-0.293036	19.9404	6.71597e-22	5.00086e-20
ENSG00000105290	-2.34863	7.89711	-15.268	6.9954e-22	5.19383e-20
ENSG00000188386	6.09637	0.554995	20.348	7.15455e-22	5.29664e-20
ENSG00000133195	-3.10876	5.02909	-18.4842	7.21218e-22	5.32392e-20
ENSG00000172292	2.51733	4.85996	19.7185	7.27566e-22	5.35535e-20
ENSG00000138378	4.39671	3.2555	18.8895	7.53629e-22	5.53129e-20
ENSG00000198785	5.44883	3.28422	21.6537	7.66468e-22	5.57462e-20
ENSG00000035664	-4.47444	4.71571	-18.8717	7.66718e-22	5.57462e-20
ENSG00000277147	1.59832	4.05538	15.3504	7.67509e-22	5.57462e-20
ENSG00000154493	-5.8613	5.70235	-15.2371	7.68238e-22	5.57462e-20
ENSG00000155511	5.00545	5.22289	23.4227	7.7625e-22	5.60109e-20
ENSG00000178965	3.81107	5.18641	20.4478	7.76259e-22	5.60109e-20
ENSG00000136098	-3.01813	5.87989	-18.3966	7.81523e-22	5.62324e-20
ENSG00000230398	4.93445	0.104432	15.2265	7.93452e-22	5.69308e-20
ENSG00000072422	-2.30531	5.05312	-15.2122	8.28702e-22	5.92939e-20
ENSG00000167755	-5.31373	3.92056	-15.199	8.62546e-22	6.15435e-20
ENSG00000214457	5.61735	-0.948085	19.5883	8.69833e-22	6.17964e-20
ENSG00000112293	2.99815	4.64191	20.7031	8.70916e-22	6.17964e-20
ENSG00000013297	-4.96871	4.88352	-15.3305	8.75231e-22	6.19311e-20
ENSG00000214376	4.10662	1.22657	20.415	8.8676e-22	6.2574e-20
ENSG00000182103	-4.30161	2.3885	-15.185	8.99883e-22	6.33256e-20
ENSG00000100626	2.89029	5.21375	15.1739	9.30786e-22	6.53208e-20
ENSG00000145920	3.84883	4.97848	15.2903	9.35355e-22	6.546e-20
ENSG00000167641	-4.75609	5.05158	-15.1715	9.3788e-22	6.546e-20
ENSG00000167995	-4.38915	5.67925	-15.1698	9.42757e-22	6.56215e-20
ENSG00000111052	3.40867	3.33625	21.1328	9.53909e-22	6.62179e-20
ENSG00000162073	-3.23077	4.52761	-15.1615	9.66636e-22	6.69199e-20
ENSG00000124831	2.06456	7.41019	21.5471	9.74837e-22	6.7277e-20
ENSG00000137142	3.37047	1.60765	19.3839	9.77398e-22	6.7277e-20
ENSG00000235436	3.32458	2.24842	19.5192	9.81277e-22	6.7277e-20
ENSG00000157483	-5.36504	5.57997	-15.1562	9.82444e-22	6.7277e-20
ENSG00000135905	-3.30732	8.69999	-19.1539	9.84926e-22	6.7277e-20
ENSG00000105695	-5.35472	6.51012	-15.1543	9.881e-22	6.73143e-20
ENSG00000088387	-1.96791	9.03993	-18.0809	1.03259e-21	7.01587e-20
ENSG00000086205	-5.41245	5.05078	-15.1256	1.07849e-21	7.29225e-20
ENSG00000134851	-2.86504	7.53384	-19.5397	1.07896e-21	7.29225e-20
ENSG00000198121	-3.7924	4.913	-15.1062	1.14434e-21	7.71373e-20
ENSG00000080224	4.98467	3.87964	35.0107	1.16032e-21	7.80092e-20
ENSG00000244112	5.55941	-0.736501	18.2024	1.17172e-21	7.85698e-20
ENSG00000269958	-2.78072	2.64626	-17.1248	1.18011e-21	7.89257e-20
ENSG00000064309	3.14774	4.46293	25.9836	1.18452e-21	7.90141e-20
ENSG00000065361	-5.66808	6.36493	-15.0791	1.24305e-21	8.26584e-20
ENSG00000117114	4.98377	3.93971	22.5762	1.2456e-21	8.26584e-20
ENSG00000185666	3.92489	4.70811	19.9271	1.26294e-21	8.35925e-20
ENSG00000260230	2.73223	5.90724	19.8982	1.27068e-21	8.38879e-20
ENSG00000100146	-5.35049	5.4945	-15.0637	1.30278e-21	8.57861e-20
ENSG00000158296	-1.52099	6.06276	-15.1947	1.30849e-21	8.59412e-20
ENSG00000187164	-2.73188	8.64497	-17.9177	1.33702e-21	8.75905e-20
ENSG00000077080	4.40678	2.66947	20.697	1.39051e-21	9.08618e-20
ENSG00000198753	-5.30449	6.02398	-15.0373	1.41243e-21	9.20596e-20
ENSG00000175175	2.57536	4.18065	20.3625	1.4359e-21	9.33177e-20
ENSG00000164512	2.98455	3.37851	15.0312	1.43902e-21	9.33177e-20
ENSG00000185008	4.43738	5.18982	17.5129	1.48264e-21	9.59038e-20
ENSG00000167191	-2.52262	7.82173	-20.2267	1.52938e-21	9.8678e-20
ENSG00000155966	4.42059	3.56333	19.3481	1.552e-21	9.98854e-20
ENSG00000249604	-3.6836	1.93889	-15.136	1.57858e-21	1.01342e-19
ENSG00000282160	4.85367	-0.922655	14.9925	1.62018e-21	1.03752e-19
ENSG00000145675	-1.76164	6.86633	-17.3414	1.62493e-21	1.03797e-19
ENSG00000102699	-3.55455	4.93181	-14.9788	1.68972e-21	1.07667e-19
ENSG00000164171	-5.55228	4.30458	-14.9722	1.72418e-21	1.09468e-19
ENSG00000197329	-2.67074	4.26882	-15.1058	1.72966e-21	1.09468e-19
ENSG00000168830	5.15833	0.24432	14.9704	1.7338e-21	1.09468e-19
ENSG00000130958	-4.13033	3.10921	-15.0991	1.73508e-21	1.09468e-19
ENSG00000247317	3.6229	2.08658	14.9685	1.74378e-21	1.09747e-19
ENSG00000183654	5.72776	0.420371	17.9475	1.75808e-21	1.10375e-19
ENSG00000206052	3.6449	4.71467	23.3008	1.77645e-21	1.11193e-19
ENSG00000151834	4.27728	3.33142	18.8681	1.77979e-21	1.11193e-19
ENSG00000129295	2.70002	4.24812	19.9534	1.80532e-21	1.12514e-19
ENSG00000143921	5.16879	0.707578	14.9527	1.83014e-21	1.13784e-19
ENSG00000158865	-5.68654	5.80713	-15.0847	1.84314e-21	1.14315e-19
ENSG00000212380	5.80216	0.59221	17.9594	1.90247e-21	1.17709e-19
ENSG00000126878	-4.96449	4.97237	-14.9223	2.00952e-21	1.24034e-19
ENSG00000154864	-5.26506	6.22948	-14.9181	2.03561e-21	1.25043e-19
ENSG00000169758	4.66901	2.12672	21.797	2.03564e-21	1.25043e-19
ENSG00000160145	2.32435	7.73423	20.8092	2.094e-21	1.2832e-19
ENSG00000154096	2.74963	5.75974	19.5145	2.11098e-21	1.29052e-19
ENSG00000115977	1.30152	8.53828	19.4425	2.14077e-21	1.30562e-19
ENSG00000006042	-4.929	5.05574	-14.893	2.19929e-21	1.33812e-19
ENSG00000166111	4.56511	3.2245	25.0908	2.21887e-21	1.34683e-19
ENSG00000172986	-2.61286	3.14902	-14.8885	2.22965e-21	1.35018e-19
ENSG00000158806	3.77422	4.34429	23.6653	2.27513e-21	1.37258e-19
ENSG00000071054	-2.65282	9.70031	-19.1843	2.27736e-21	1.37258e-19
ENSG00000172005	-4.90635	3.13261	-14.8769	2.3108e-21	1.38946e-19
ENSG00000157152	4.00563	4.97938	18.4411	2.32579e-21	1.39387e-19
ENSG00000100884	4.45779	3.79936	20.996	2.32902e-21	1.39387e-19
ENSG00000225361	3.25965	1.11815	14.8488	2.51978e-21	1.50453e-19
ENSG00000154917	2.43667	5.48763	23.5658	2.58979e-21	1.54273e-19
ENSG00000198300	1.89952	8.5446	20.7614	2.60558e-21	1.54853e-19
ENSG00000197043	2.98936	6.21967	20.1614	2.72437e-21	1.61539e-19
ENSG00000169933	4.69702	3.77613	18.1534	2.74094e-21	1.62146e-19
ENSG00000106789	4.40151	2.1636	14.8171	2.7785e-21	1.63989e-19
ENSG00000116574	-4.09173	5.04285	-17.6542	2.81105e-21	1.65529e-19
ENSG00000102678	4.83269	2.33935	21.9859	2.87294e-21	1.68785e-19
ENSG00000123095	-1.88022	6.31613	-14.7957	2.96856e-21	1.74004e-19
ENSG00000102003	2.15047	7.13784	20.2913	3.00272e-21	1.75604e-19
ENSG00000176463	-1.80936	6.97875	-18.3061	3.05919e-21	1.78499e-19
ENSG00000151789	4.50543	4.19831	20.2253	3.12024e-21	1.81647e-19
ENSG00000150510	-3.37759	5.72694	-17.6782	3.46325e-21	2.01159e-19
ENSG00000072110	3.51535	5.40636	14.7389	3.53848e-21	2.05063e-19
ENSG00000148180	-4.18342	7.88186	-14.7295	3.64251e-21	2.10397e-19
ENSG00000082781	-3.7164	3.30564	-14.7291	3.64693e-21	2.10397e-19
ENSG00000179057	4.3551	1.66692	14.8304	3.71471e-21	2.13825e-19
ENSG00000065600	-2.56083	4.89057	-17.5345	3.72945e-21	2.14192e-19
ENSG00000259070	-5.60058	4.9515	-14.7121	3.84478e-21	2.20322e-19
ENSG00000189136	2.06661	5.27655	14.8178	3.86568e-21	2.21026e-19
ENSG00000119280	-3.9531	5.51013	-14.7026	3.9599e-21	2.25909e-19
ENSG00000165424	-5.26396	4.75841	-14.701	3.979e-21	2.26493e-19
ENSG00000103365	1.92681	6.96098	21.0688	4.01612e-21	2.281e-19
ENSG00000228016	4.21353	1.03934	18.8621	4.16078e-21	2.35793e-19
ENSG00000140262	-2.38371	7.08308	-20.2894	4.21731e-21	2.38387e-19
ENSG00000152402	2.22065	5.23524	14.6815	4.22702e-21	2.38387e-19
ENSG00000144642	2.25285	4.70284	17.425	4.23448e-21	2.38387e-19
ENSG00000188582	4.75923	0.595052	14.6752	4.31094e-21	2.4216e-19
ENSG00000156642	2.06588	5.97863	20.6179	4.32995e-21	2.42695e-19
ENSG00000154162	3.61067	3.67039	14.6675	4.4153e-21	2.46939e-19
ENSG00000172888	-2.03299	5.59001	-19.2381	4.46217e-21	2.49016e-19
ENSG00000110675	3.02625	5.18534	19.4735	4.47189e-21	2.49016e-19
ENSG00000132561	-2.93192	5.44711	-14.7854	4.52848e-21	2.51621e-19
ENSG00000140848	-4.13721	6.2202	-16.7527	4.5987e-21	2.54969e-19
ENSG00000109654	-1.97084	8.69508	-18.1516	4.61369e-21	2.55223e-19
ENSG00000181652	4.50709	2.23689	19.9725	4.62321e-21	2.55223e-19
ENSG00000229089	4.96473	2.48911	23.4386	4.82479e-21	2.65778e-19
ENSG00000077522	-3.33358	7.52133	-14.6366	4.86002e-21	2.67145e-19
ENSG00000170456	1.61778	6.81238	19.8463	4.89621e-21	2.68558e-19
ENSG00000233006	1.82672	4.65406	18.4202	4.95775e-21	2.71352e-19
ENSG00000197457	2.42811	5.33304	20.5073	5.0445e-21	2.75511e-19
ENSG00000105613	4.55331	5.8961	23.1609	5.11179e-21	2.78592e-19
ENSG00000169851	1.99212	6.62912	14.6173	5.16099e-21	2.80677e-19
ENSG00000218336	3.11359	4.69212	22.0305	5.26661e-21	2.85814e-19
ENSG00000135773	-4.76517	0.54908	-14.72	5.57066e-21	3.01675e-19
ENSG00000070214	-3.77677	7.74312	-17.8923	5.59751e-21	3.02376e-19
ENSG00000158006	-1.44782	3.7069	-14.7173	5.60721e-21	3.02376e-19
ENSG00000066468	-3.93838	7.54658	-14.5875	5.66206e-21	3.04692e-19
ENSG00000105143	3.98126	1.69858	14.5823	5.755e-21	3.09045e-19
ENSG00000157168	5.5601	3.63705	21.5865	5.94462e-21	3.1856e-19
ENSG00000152954	3.05719	4.94435	17.8508	5.98127e-21	3.19855e-19
ENSG00000254585	4.13852	1.63057	14.5684	6.00962e-21	3.20701e-19
ENSG00000170075	-5.21559	3.79764	-14.5654	6.0672e-21	3.231e-19
ENSG00000076555	-2.65176	6.37414	-14.5641	6.09127e-21	3.23709e-19
ENSG00000008283	3.59066	2.4538	19.3802	6.2222e-21	3.29983e-19
ENSG00000122367	-5.48791	5.8843	-14.5442	6.48023e-21	3.42957e-19
ENSG00000141458	-2.5518	6.73633	-18.358	6.57272e-21	3.47134e-19
ENSG00000148826	-5.12447	4.79546	-14.5382	6.60386e-21	3.48062e-19
ENSG00000164741	-1.77284	6.60245	-14.6546	6.71343e-21	3.5311e-19
ENSG00000279113	4.9281	-1.58985	18.6905	6.93545e-21	3.6404e-19
ENSG00000261121	-5.4477	2.27364	-14.5215	6.95725e-21	3.64438e-19
ENSG00000184349	4.66828	2.42948	17.3136	7.11516e-21	3.71948e-19
ENSG00000224928	5.55806	-1.73454	19.4973	7.20821e-21	3.76045e-19
ENSG00000112053	5.20756	1.67711	18.4782	7.27898e-21	3.78965e-19
ENSG00000181215	4.79869	4.91167	26.8666	7.3534e-21	3.82063e-19
ENSG00000171617	2.97506	4.22336	18.0254	7.39798e-21	3.82957e-19
ENSG00000028528	-1.83166	7.37461	-19.1029	7.41355e-21	3.82957e-19
ENSG00000132849	2.25608	6.41573	23.4023	7.41545e-21	3.82957e-19
ENSG00000283415	5.13779	0.687469	14.4987	7.47055e-21	3.85026e-19
ENSG00000135127	3.64876	5.55052	20.8947	7.65398e-21	3.93688e-19
ENSG00000184788	2.94515	1.80331	14.4847	7.80471e-21	4.00636e-19
ENSG00000005513	-4.88657	4.50438	-14.4835	7.83421e-21	4.01346e-19
ENSG00000198932	2.27092	8.38358	22.9285	7.91151e-21	4.04498e-19
ENSG00000112851	-2.54261	8.13705	-18.8091	7.97292e-21	4.06825e-19
ENSG00000203809	4.99385	-0.321131	16.9055	8.07228e-21	4.11076e-19
ENSG00000010278	-5.03529	3.78368	-14.4714	8.1364e-21	4.1352e-19
ENSG00000130449	-1.5596	6.77317	-18.3242	8.29792e-21	4.20894e-19
ENSG00000128242	-2.83963	4.29762	-15.8632	8.3849e-21	4.24465e-19
ENSG00000149633	-5.38569	5.65276	-14.586	8.40191e-21	4.24487e-19
ENSG00000169258	3.58027	3.44918	18.4165	8.75623e-21	4.41517e-19
ENSG00000106261	-1.67013	8.62262	-17.1068	8.88574e-21	4.46812e-19
ENSG00000172782	5.55377	1.22798	21.7456	8.89611e-21	4.46812e-19
ENSG00000166173	-2.35602	6.08204	-20.2023	8.93359e-21	4.47816e-19
ENSG00000188153	-3.33336	6.85611	-14.562	9.0233e-21	4.5143e-19
ENSG00000127585	3.31098	4.48284	20.4186	9.14843e-21	4.56797e-19
ENSG00000160097	3.94275	3.83499	18.0594	9.38167e-21	4.67532e-19
ENSG00000127249	-2.69962	5.72617	-18.5158	9.6348e-21	4.79214e-19
ENSG00000138075	4.472	-1.54958	14.5354	9.81739e-21	4.8735e-19
ENSG00000006607	-1.32351	6.78306	-14.5314	9.88102e-21	4.88892e-19
ENSG00000261115	2.27808	5.69798	25.9122	9.88664e-21	4.88892e-19
ENSG00000085117	-4.30819	3.7388	-19.0309	9.95804e-21	4.91474e-19
ENSG00000160584	-1.70527	8.78023	-17.5299	9.98899e-21	4.92054e-19
ENSG00000127946	-3.27357	7.05231	-18.4507	1.00247e-20	4.92224e-19
ENSG00000052126	2.36241	7.615	29.7656	1.00309e-20	4.92224e-19
ENSG00000144619	4.37589	4.67425	17.4915	1.01467e-20	4.96956e-19
ENSG00000165959	-4.11025	7.41089	-14.3994	1.01982e-20	4.98524e-19
ENSG00000256020	-5.05402	-0.705036	-17.2349	1.08651e-20	5.30113e-19
ENSG00000200163	5.40904	-1.3084	21.0461	1.08882e-20	5.30229e-19
ENSG00000166257	5.0451	4.5051	21.5903	1.09127e-20	5.30413e-19
ENSG00000134243	-2.63496	8.19437	-18.5529	1.10577e-20	5.36447e-19
ENSG00000114993	-3.81526	6.21889	-18.0026	1.11212e-20	5.3847e-19
ENSG00000164176	-2.91243	6.75541	-18.6739	1.11415e-20	5.3847e-19
ENSG00000101265	-4.75958	5.84292	-14.3691	1.12138e-20	5.40257e-19
ENSG00000166862	3.15194	2.713	19.3547	1.12206e-20	5.40257e-19
ENSG00000131016	2.43017	6.85857	17.6765	1.14508e-20	5.50305e-19
ENSG00000231566	4.1993	-2.10784	14.4806	1.15483e-20	5.53953e-19
ENSG00000161544	3.84504	1.24291	14.3591	1.15747e-20	5.54179e-19
ENSG00000007402	4.33834	5.60794	23.6799	1.18429e-20	5.65924e-19
ENSG00000167549	4.73917	5.56499	28.8215	1.18642e-20	5.65924e-19
ENSG00000200812	5.73438	-0.717076	20.0364	1.19328e-20	5.68138e-19
ENSG00000076604	-3.16161	4.22337	-18.849	1.19882e-20	5.69718e-19
ENSG00000151552	-2.91105	6.87151	-20.5276	1.22548e-20	5.81307e-19
ENSG00000213047	2.78714	3.7996	18.126	1.24506e-20	5.88454e-19
ENSG00000155980	2.65148	7.37243	20.6904	1.24514e-20	5.88454e-19
ENSG00000140153	-1.64963	5.89955	-19.58	1.29586e-20	6.11298e-19
ENSG00000159164	2.36286	6.68817	20.0995	1.29885e-20	6.1158e-19
ENSG00000082293	4.66581	3.87175	17.9203	1.33113e-20	6.2563e-19
ENSG00000199489	6.50674	0.216096	21.3658	1.34655e-20	6.31718e-19
ENSG00000171450	4.56631	2.46996	17.3816	1.37303e-20	6.42963e-19
ENSG00000168032	4.4409	2.50362	18.1238	1.41346e-20	6.60689e-19
ENSG00000213023	2.99639	3.11811	19.6066	1.41877e-20	6.61963e-19
ENSG00000180929	-4.2323	2.38077	-14.2927	1.42615e-20	6.64199e-19
ENSG00000073008	1.76548	5.21748	19.9229	1.43361e-20	6.66461e-19
ENSG00000113578	-3.22351	4.21161	-17.8901	1.44143e-20	6.68881e-19
ENSG00000149557	-2.41104	7.52632	-16.9122	1.45641e-20	6.7461e-19
ENSG00000256849	5.15994	-1.16054	17.1363	1.47047e-20	6.79894e-19
ENSG00000177679	5.91825	6.26929	19.34	1.47799e-20	6.8214e-19
ENSG00000264050	-4.81565	0.0404214	-14.2808	1.48077e-20	6.82193e-19
ENSG00000118276	3.78284	4.70525	18.4972	1.50361e-20	6.91471e-19
ENSG00000230615	-3.14588	1.53865	-14.275	1.50826e-20	6.9154e-19
ENSG00000176438	-3.52818	5.79534	-17.4624	1.50916e-20	6.9154e-19
ENSG00000023171	2.12256	7.03219	18.0098	1.63372e-20	7.47283e-19
ENSG00000092051	3.91731	5.28867	18.7407	1.652e-20	7.54295e-19
ENSG00000179796	3.80813	3.75778	17.4862	1.69382e-20	7.72013e-19
ENSG00000196187	-5.32041	7.62538	-14.2361	1.70545e-20	7.75935e-19
ENSG00000197993	-4.43097	4.41291	-14.3444	1.76487e-20	8.01547e-19
ENSG00000224795	-5.95796	2.2773	-14.2238	1.77286e-20	8.03749e-19
ENSG00000163075	3.29838	3.41752	18.6823	1.78961e-20	8.09909e-19
ENSG00000091844	2.92843	3.05579	18.5253	1.79318e-20	8.10092e-19
ENSG00000156097	4.77441	2.9953	24.9648	1.803e-20	8.13097e-19
ENSG00000198756	-2.5665	6.58182	-17.1488	1.88477e-20	8.48479e-19
ENSG00000006210	3.45512	4.34892	18.3052	1.8949e-20	8.5154e-19
ENSG00000100842	-5.71013	3.92087	-14.3176	1.92084e-20	8.61685e-19
ENSG00000185634	-3.58742	4.35597	-17.136	1.95727e-20	8.76493e-19
ENSG00000137843	4.62367	0.925237	17.606	1.97147e-20	8.81311e-19
ENSG00000180777	6.30409	2.10912	21.3274	1.98558e-20	8.86072e-19
ENSG00000067955	-2.70853	4.74377	-16.2482	2.00664e-20	8.93913e-19
ENSG00000091622	3.7074	5.1477	18.7087	2.02233e-20	8.99338e-19
ENSG00000149054	5.05607	0.543298	16.7376	2.10272e-20	9.33471e-19
ENSG00000135503	1.82188	5.04822	16.5064	2.11481e-20	9.36612e-19
ENSG00000186479	3.38784	3.70732	17.9614	2.11711e-20	9.36612e-19
ENSG00000179104	-2.45228	6.93998	-17.4877	2.17931e-20	9.62464e-19
ENSG00000160188	3.31723	2.72874	18.6385	2.18894e-20	9.65055e-19
ENSG00000202373	5.56296	-0.867538	18.7449	2.19899e-20	9.67632e-19
ENSG00000111816	-2.8527	3.77603	-14.2731	2.2034e-20	9.67632e-19
ENSG00000283709	3.05407	4.24644	21.8926	2.20612e-20	9.67632e-19
ENSG00000159712	3.10479	4.51426	14.154	2.2112e-20	9.68201e-19
ENSG00000204131	2.76742	3.78783	19.5698	2.22901e-20	9.74335e-19
ENSG00000040933	1.36505	7.08862	19.4868	2.24065e-20	9.77756e-19
ENSG00000164161	-3.58163	5.99539	-14.1474	2.25814e-20	9.83711e-19
ENSG00000262188	-6.00599	0.90932	-14.1437	2.28436e-20	9.93447e-19
ENSG00000188124	5.42681	-0.30547	16.6503	2.3509e-20	1.02065e-18
ENSG00000157851	-1.95714	7.13431	-14.1306	2.38113e-20	1.03202e-18
ENSG00000162522	3.65176	2.79921	19.4975	2.43228e-20	1.05241e-18
ENSG00000067715	4.49638	6.82755	17.1814	2.44374e-20	1.05559e-18
ENSG00000101542	-2.9776	5.70542	-14.1108	2.53597e-20	1.09358e-18
ENSG00000102385	3.03162	5.16442	19.895	2.58065e-20	1.11098e-18
ENSG00000112981	2.80821	2.93778	17.3623	2.60308e-20	1.11699e-18
ENSG00000127603	-1.54143	11.9	-16.1172	2.60563e-20	1.11699e-18
ENSG00000135821	-3.76814	7.5146	-14.102	2.6077e-20	1.11699e-18
ENSG00000022267	2.62344	4.58771	18.148	2.61255e-20	1.1172e-18
ENSG00000109846	-4.08504	5.62161	-14.2117	2.67918e-20	1.14379e-18
ENSG00000253877	-5.79166	0.492002	-18.28	2.73517e-20	1.16574e-18
ENSG00000100167	2.62041	5.44478	23.8712	2.74084e-20	1.16622e-18
ENSG00000100596	-1.86966	6.61242	-19.2011	2.75362e-20	1.16857e-18
ENSG00000166046	-2.41141	6.17601	-18.0763	2.75696e-20	1.16857e-18
ENSG00000183580	-3.51422	3.92142	-16.3414	2.76005e-20	1.16857e-18
ENSG00000107742	2.72316	7.09425	17.9785	2.82847e-20	1.19548e-18
ENSG00000253554	5.76939	0.68911	14.0759	2.83299e-20	1.19548e-18
ENSG00000103056	3.3774	3.70529	18.1041	2.83761e-20	1.19548e-18
ENSG00000148400	-4.67129	4.92945	-14.0745	2.84565e-20	1.1969e-18
ENSG00000154556	2.73337	6.07805	21.2036	2.90712e-20	1.22075e-18
ENSG00000044115	-2.34702	6.3585	-14.0644	2.93865e-20	1.23197e-18
ENSG00000132842	-1.79731	6.31917	-17.1463	2.94783e-20	1.2338e-18
ENSG00000156218	-2.19225	4.33646	-17.8213	3.10202e-20	1.29501e-18
ENSG00000204580	-2.60389	6.33831	-14.0472	3.10417e-20	1.29501e-18
ENSG00000171621	-3.61129	2.76546	-14.0463	3.11324e-20	1.29668e-18
ENSG00000196277	2.44858	5.31163	14.1222	3.23353e-20	1.34265e-18
ENSG00000119326	2.57146	3.49195	18.4713	3.23768e-20	1.34265e-18
ENSG00000158856	3.97198	4.61811	22.9743	3.23935e-20	1.34265e-18
ENSG00000131386	-3.57158	4.8653	-14.0323	3.25516e-20	1.34702e-18
ENSG00000033327	-1.90129	6.83771	-19.555	3.27228e-20	1.35184e-18
ENSG00000198597	-2.54549	6.92955	-16.9473	3.27734e-20	1.35184e-18
ENSG00000161682	3.23103	3.11721	18.4173	3.30694e-20	1.36185e-18
ENSG00000110777	-4.53959	1.35439	-14.0259	3.32178e-20	1.36577e-18
ENSG00000164303	-4.7797	3.40557	-14.1399	3.33661e-20	1.36967e-18
ENSG00000102466	2.79601	5.07046	21.9573	3.35389e-20	1.37456e-18
ENSG00000283503	4.27642	2.94016	20.5491	3.39682e-20	1.38778e-18
ENSG00000134215	3.84231	4.00876	18.613	3.397e-20	1.38778e-18
ENSG00000050030	3.05202	3.77301	20.1426	3.40644e-20	1.38889e-18
ENSG00000244055	-2.53128	4.75609	-18.7001	3.41085e-20	1.38889e-18
ENSG00000136052	2.75687	3.89807	20.6213	3.41598e-20	1.38889e-18
ENSG00000233508	4.82632	-0.504762	15.6589	3.43126e-20	1.3929e-18
ENSG00000003147	3.33298	5.27082	19.8889	3.55012e-20	1.43887e-18
ENSG00000110888	1.97534	7.60194	17.0829	3.61353e-20	1.46225e-18
ENSG00000131044	-1.95171	4.72136	-14.1119	3.63253e-20	1.46558e-18
ENSG00000200638	5.94043	-0.404937	19.1731	3.63321e-20	1.46558e-18
ENSG00000186318	-1.29926	6.96296	-13.9952	3.66315e-20	1.47534e-18
ENSG00000081377	-1.70191	6.51816	-19.0278	3.86151e-20	1.55279e-18
ENSG00000164070	2.87774	6.03932	27.5239	3.87753e-20	1.55679e-18
ENSG00000103544	-1.32276	6.67356	-18.114	3.89775e-20	1.5605e-18
ENSG00000179406	-1.82262	4.91753	-17.336	3.89897e-20	1.5605e-18
ENSG00000114439	-1.53275	6.53967	-14.0831	3.95088e-20	1.57881e-18
ENSG00000198626	2.4012	8.33606	18.5558	3.96483e-20	1.58192e-18
ENSG00000182185	-2.73943	4.0021	-17.5122	3.99175e-20	1.59018e-18
ENSG00000204186	2.60673	5.92111	18.9936	4.01801e-20	1.59816e-18
ENSG00000263069	2.55388	3.42185	18.8497	4.09602e-20	1.62535e-18
ENSG00000139737	-2.94124	7.55132	-16.6399	4.10489e-20	1.62535e-18
ENSG00000165795	-3.99518	6.08661	-17.9392	4.1054e-20	1.62535e-18
ENSG00000143418	-1.6517	5.51565	-13.9571	4.13781e-20	1.63565e-18
ENSG00000133313	-1.8136	6.37486	-18.4553	4.18017e-20	1.64985e-18
ENSG00000257556	5.51066	-0.777506	17.3427	4.25504e-20	1.67681e-18
ENSG00000103540	-2.42298	7.38497	-18.5834	4.29274e-20	1.68907e-18
ENSG00000200726	6.38598	1.77357	19.1153	4.35048e-20	1.70916e-18
ENSG00000267665	4.96378	-0.0764304	14.0505	4.41991e-20	1.73167e-18
ENSG00000140479	-4.23194	6.9121	-13.9363	4.42129e-20	1.73167e-18
ENSG00000225978	5.61471	-0.694693	16.7894	4.49835e-20	1.75916e-18
ENSG00000279495	-1.85416	5.42658	-13.9256	4.57524e-20	1.78651e-18
ENSG00000153233	5.1226	2.05048	19.526	4.71911e-20	1.83988e-18
ENSG00000140577	-1.02769	6.5714	-14.0238	4.7372e-20	1.84412e-18
ENSG00000154099	4.9572	4.1772	18.3895	4.80894e-20	1.86921e-18
ENSG00000122778	2.18311	5.3508	13.9068	4.85939e-20	1.88596e-18
ENSG00000166171	2.33076	2.41542	16.6954	4.88697e-20	1.89379e-18
ENSG00000145428	3.5073	2.83442	20.6074	4.99055e-20	1.93101e-18
ENSG00000188517	4.10059	3.71663	19.3548	5.0005e-20	1.93194e-18
ENSG00000105696	2.94927	4.95781	17.0878	5.12297e-20	1.97628e-18
ENSG00000232352	-4.76429	-1.30217	-13.8839	5.22988e-20	2.01449e-18
ENSG00000165566	-3.14806	7.55904	-20.9037	5.3708e-20	2.06566e-18
ENSG00000182230	5.98024	1.34973	19.2719	5.38784e-20	2.06911e-18
ENSG00000122545	-2.48936	8.59028	-18.1047	5.42832e-20	2.08153e-18
ENSG00000198732	-3.18331	4.6872	-13.9819	5.49954e-20	2.10569e-18
ENSG00000158352	-5.53025	5.87672	-13.8672	5.51674e-20	2.10912e-18
ENSG00000084093	-4.56601	3.299	-13.8645	5.56523e-20	2.12449e-18
ENSG00000200680	6.32463	1.09501	19.2952	6.00516e-20	2.28902e-18
ENSG00000119139	-2.22059	3.85363	-17.1226	6.01691e-20	2.29009e-18
ENSG00000065923	2.42859	5.30441	17.0871	6.05113e-20	2.2997e-18
ENSG00000232040	4.899	1.5706	16.5187	6.11341e-20	2.31993e-18
ENSG00000152518	-4.59464	3.47819	-13.8346	6.12545e-20	2.32106e-18
ENSG00000211584	-2.16932	5.83042	-18.1601	6.14626e-20	2.3255e-18
ENSG00000183111	-2.63368	6.32608	-16.4817	6.18293e-20	2.33593e-18
ENSG00000180190	2.50047	4.07429	19.4755	6.33022e-20	2.38805e-18
ENSG00000171811	4.53769	4.72466	18.9805	6.57739e-20	2.47765e-18
ENSG00000146267	2.92966	4.2861	23.2121	6.95868e-20	2.61532e-18
ENSG00000201969	6.35632	0.463884	19.3188	6.96328e-20	2.61532e-18
ENSG00000177807	-5.24622	4.71569	-13.9031	6.99705e-20	2.62415e-18
ENSG00000189159	2.43706	2.35685	18.1735	7.04236e-20	2.63466e-18
ENSG00000250994	4.04613	-2.2114	13.9018	7.04565e-20	2.63466e-18
ENSG00000012124	-5.98898	5.87524	-13.901	7.09899e-20	2.65074e-18
ENSG00000132639	3.30638	6.48961	18.949	7.14613e-20	2.66446e-18
ENSG00000152495	2.38373	4.21364	16.2849	7.16727e-20	2.66753e-18
ENSG00000232837	4.3646	-1.40279	15.487	7.17521e-20	2.66753e-18
ENSG00000178764	-2.60399	4.87454	-16.6334	7.26087e-20	2.69546e-18
ENSG00000232872	2.88524	2.61661	20.2843	7.37578e-20	2.73416e-18
ENSG00000061918	2.90354	4.65498	19.7687	7.53764e-20	2.79013e-18
ENSG00000227036	-2.2776	5.75915	-13.7683	7.58033e-20	2.80188e-18
ENSG00000284686	-4.0368	0.369949	-13.7661	7.63291e-20	2.81725e-18
ENSG00000171502	5.42551	3.3639	17.6149	7.8193e-20	2.88189e-18
ENSG00000199833	6.15274	0.881323	19.2229	7.96242e-20	2.92783e-18
ENSG00000104361	2.96044	3.59026	17.9111	7.96679e-20	2.92783e-18
ENSG00000135362	-5.0775	4.64494	-13.7511	8.0109e-20	2.93982e-18
ENSG00000164649	-2.88851	3.11994	-13.7499	8.04346e-20	2.94754e-18
ENSG00000136237	-2.88303	7.45003	-13.8586	8.09964e-20	2.96389e-18
ENSG00000075539	-2.57373	8.74095	-17.044	8.17775e-20	2.9882e-18
ENSG00000100991	-1.27223	6.96668	-16.4931	8.31544e-20	3.03419e-18
ENSG00000240534	-6.03469	1.47108	-13.849	8.36742e-20	3.04881e-18
ENSG00000179403	-3.89868	4.89066	-13.736	8.41019e-20	3.06004e-18
ENSG00000206432	2.77747	3.79067	17.704	8.50347e-20	3.08828e-18
ENSG00000116191	2.59478	4.23659	18.607	8.5119e-20	3.08828e-18
ENSG00000225746	3.77051	6.11837	19.2316	8.52894e-20	3.09008e-18
ENSG00000056736	-2.81842	3.15599	-13.7263	8.67706e-20	3.13931e-18
ENSG00000158748	5.59623	-1.06995	17.6102	8.8582e-20	3.20032e-18
ENSG00000073150	3.85378	2.72228	20.5851	8.9118e-20	3.21515e-18
ENSG00000179915	1.87561	8.1307	13.7108	9.12282e-20	3.28665e-18
ENSG00000138944	5.59624	2.36049	17.9815	9.15857e-20	3.2949e-18
ENSG00000182255	4.16635	2.58881	22.0387	9.28733e-20	3.33528e-18
ENSG00000119042	-3.91336	2.96723	-13.8138	9.29686e-20	3.33528e-18
ENSG00000114019	-2.59292	6.44349	-18.7147	9.38001e-20	3.3604e-18
ENSG00000174306	-1.26216	6.92844	-18.5365	9.93054e-20	3.55266e-18
ENSG00000261594	4.27791	-1.20746	13.6798	1.00825e-19	3.602e-18
ENSG00000180834	-3.79612	2.95961	-13.6765	1.01908e-19	3.63562e-18
ENSG00000125820	-4.26396	3.79439	-13.783	1.02574e-19	3.65291e-18
ENSG00000137713	-2.06276	5.14234	-17.2707	1.02678e-19	3.65291e-18
ENSG00000105409	4.25947	3.84485	19.0011	1.03524e-19	3.67193e-18
ENSG00000147488	-5.4052	7.59012	-13.6713	1.03638e-19	3.67193e-18
ENSG00000255916	5.5888	-0.930969	18.9893	1.03688e-19	3.67193e-18
ENSG00000197694	2.82337	9.80405	17.9004	1.03786e-19	3.67193e-18
ENSG00000008294	-1.22334	9.01751	-16.2984	1.04069e-19	3.67686e-18
ENSG00000166091	-5.39349	3.06231	-13.6674	1.0493e-19	3.70219e-18
ENSG00000085982	-1.44175	7.10268	-13.6625	1.06633e-19	3.75709e-18
ENSG00000143995	-3.30789	5.75387	-13.6601	1.07463e-19	3.78112e-18
ENSG00000085831	5.05478	3.05292	20.4927	1.08562e-19	3.81455e-18
ENSG00000080200	-3.16261	6.82229	-13.7625	1.08979e-19	3.82397e-18
ENSG00000074317	4.13835	3.72488	13.6531	1.09895e-19	3.85083e-18
ENSG00000163013	3.44692	4.8266	18.039	1.10241e-19	3.85769e-18
ENSG00000177156	-1.56098	5.55445	-13.6509	1.10699e-19	3.86844e-18
ENSG00000130477	3.47603	6.74285	19.7461	1.10961e-19	3.8723e-18
ENSG00000103449	-3.75278	4.50526	-13.6481	1.11694e-19	3.89256e-18
ENSG00000153395	2.19086	5.28454	18.2071	1.16879e-19	4.06774e-18
ENSG00000178234	1.56211	5.90708	20.9458	1.17195e-19	4.07321e-18
ENSG00000196730	2.84828	5.3236	13.6304	1.18284e-19	4.10548e-18
ENSG00000136451	-1.89564	5.49746	-18.059	1.18585e-19	4.11036e-18
ENSG00000201992	6.12529	0.200117	20.0383	1.19365e-19	4.1318e-18
ENSG00000248211	4.22615	-1.90938	13.6264	1.19832e-19	4.13789e-18
ENSG00000167524	1.3966	6.00221	13.6263	1.19864e-19	4.13789e-18
ENSG00000104290	2.13963	5.24587	21.9633	1.21645e-19	4.19231e-18
ENSG00000184371	-3.15311	4.64731	-13.6214	1.21768e-19	4.19231e-18
ENSG00000160307	-3.72897	5.82392	-13.6178	1.23221e-19	4.23665e-18
ENSG00000171044	2.11552	4.63757	13.7148	1.24662e-19	4.28045e-18
ENSG00000186260	1.79325	6.17947	13.6099	1.26387e-19	4.33388e-18
ENSG00000250366	5.08307	1.60123	22.909	1.28929e-19	4.41427e-18
ENSG00000117600	2.86324	4.62731	20.3955	1.29076e-19	4.41427e-18
ENSG00000173715	3.13147	4.07174	19.5049	1.32228e-19	4.51602e-18
ENSG00000164588	4.97335	2.80031	17.4298	1.32772e-19	4.52856e-18
ENSG00000022567	2.67777	4.4036	19.564	1.33014e-19	4.5308e-18
ENSG00000138814	1.30596	6.24536	13.6916	1.33882e-19	4.55431e-18
ENSG00000107147	6.53754	3.55002	20.6376	1.35541e-19	4.60462e-18
ENSG00000169562	-4.87758	2.84313	-13.6945	1.36269e-19	4.62323e-18
ENSG00000185090	2.06454	2.48292	17.3874	1.36507e-19	4.62517e-18
ENSG00000227016	4.83394	-0.580709	15.9628	1.38598e-19	4.6898e-18
ENSG00000258844	-4.86004	1.92813	-13.6886	1.39095e-19	4.70042e-18
ENSG00000240412	5.3623	-0.47298	15.9923	1.39641e-19	4.71265e-18
ENSG00000152822	4.42175	4.07823	23.5511	1.4149e-19	4.76876e-18
ENSG00000200503	6.24087	7.12367	20.0889	1.42526e-19	4.79739e-18
ENSG00000143315	-1.72933	4.21065	-13.6749	1.45446e-19	4.88925e-18
ENSG00000167654	2.29023	6.49372	13.5657	1.4587e-19	4.89706e-18
ENSG00000054803	5.43921	0.65723	13.5587	1.49217e-19	5.00287e-18
ENSG00000255136	5.26813	-0.692058	18.6303	1.49579e-19	5.00845e-18
ENSG00000281969	-4.82111	4.25662	-13.5555	1.50775e-19	5.0419e-18
ENSG00000116985	-4.01615	1.32116	-13.5527	1.52152e-19	5.08132e-18
ENSG00000167535	4.02923	3.32492	18.4662	1.53891e-19	5.13271e-18
ENSG00000283183	3.0385	4.13414	17.1826	1.56707e-19	5.21982e-18
ENSG00000143674	3.39237	3.10959	18.1396	1.57853e-19	5.25116e-18
ENSG00000154930	-4.50389	4.8486	-17.1033	1.58455e-19	5.26435e-18
ENSG00000115109	2.02382	5.76936	20.9361	1.59003e-19	5.27573e-18
ENSG00000253974	5.99577	2.35068	20.1573	1.62015e-19	5.36872e-18
ENSG00000125170	3.11638	3.38068	19.9574	1.67064e-19	5.52766e-18
ENSG00000175220	-2.50756	6.235	-22.4168	1.67392e-19	5.52766e-18
ENSG00000187984	5.85973	2.672	18.0152	1.67459e-19	5.52766e-18
ENSG00000265763	-4.22132	3.81239	-13.5197	1.69361e-19	5.58324e-18
ENSG00000128283	-5.19374	3.89114	-13.5193	1.69607e-19	5.58417e-18
ENSG00000197324	-3.48973	3.35965	-13.5182	1.70189e-19	5.59613e-18
ENSG00000157193	2.63047	5.93364	19.3841	1.74809e-19	5.74067e-18
ENSG00000068650	-1.93503	7.35294	-16.926	1.75434e-19	5.75382e-18
ENSG00000125744	3.01697	3.42351	19.9629	1.76521e-19	5.78207e-18
ENSG00000185742	6.03193	2.80669	13.502	1.79394e-19	5.86869e-18
ENSG00000137821	2.0654	6.22571	20.7611	1.81064e-19	5.91575e-18
ENSG00000170802	-2.86166	4.79895	-17.1961	1.81658e-19	5.92761e-18
ENSG00000185105	4.6835	-1.54932	17.7392	1.82994e-19	5.96361e-18
ENSG00000115652	1.7926	5.46953	20.221	1.84828e-19	6.01571e-18
ENSG00000163235	-2.90666	3.08539	-16.6631	1.88538e-19	6.12869e-18
ENSG00000203930	1.51901	9.50157	13.5876	1.88999e-19	6.13589e-18
ENSG00000133687	3.07625	4.56533	18.33	1.89537e-19	6.14557e-18
ENSG00000152413	1.92856	5.00997	17.7123	1.90781e-19	6.17807e-18
ENSG00000235518	4.6683	0.320516	17.8715	1.92289e-19	6.21905e-18
ENSG00000203727	4.84001	3.24329	18.398	1.93606e-19	6.25376e-18
ENSG00000189067	-4.08661	2.85017	-13.5792	1.96748e-19	6.34723e-18
ENSG00000124507	4.59052	4.67295	18.5272	1.97639e-19	6.36797e-18
ENSG00000175785	-2.95066	4.58517	-13.5772	1.98736e-19	6.39527e-18
ENSG00000250131	-3.12931	1.00995	-13.4687	1.99958e-19	6.42396e-18
ENSG00000111490	3.1412	5.12981	23.7079	2.0013e-19	6.42396e-18
ENSG00000114541	-2.99652	7.86826	-15.2824	2.01344e-19	6.449e-18
ENSG00000110080	-2.82657	5.34908	-16.8285	2.01413e-19	6.449e-18
ENSG00000135824	4.42058	3.88629	17.3699	2.03122e-19	6.49559e-18
ENSG00000166343	1.82003	3.3858	15.704	2.04549e-19	6.53309e-18
ENSG00000161082	4.33537	4.47993	19.8527	2.05246e-19	6.54718e-18
ENSG00000183778	1.74304	4.25819	13.4589	2.06422e-19	6.57648e-18
ENSG00000008441	-3.63716	6.46685	-13.456	2.08403e-19	6.63134e-18
ENSG00000108947	4.4502	2.08727	16.6662	2.09081e-19	6.64466e-18
ENSG00000168824	4.1844	3.40693	16.0016	2.09764e-19	6.65813e-18
ENSG00000161249	5.2597	2.58756	18.2223	2.12123e-19	6.72467e-18
ENSG00000199704	6.21867	-0.469653	18.7675	2.12425e-19	6.72591e-18
ENSG00000133019	4.17851	3.23668	17.5064	2.15408e-19	6.81195e-18
ENSG00000239828	-3.71461	2.07892	-16.9492	2.17626e-19	6.87361e-18
ENSG00000106526	2.10318	3.18083	16.6826	2.18596e-19	6.89573e-18
ENSG00000168959	2.68385	6.42507	19.0446	2.22407e-19	7.00734e-18
ENSG00000172086	-2.18032	4.0608	-16.9834	2.23407e-19	7.03018e-18
ENSG00000064787	-5.53743	6.02628	-13.4318	2.25483e-19	7.08679e-18
ENSG00000227745	5.23426	1.88747	13.4277	2.28524e-19	7.16668e-18
ENSG00000184254	-3.68131	2.63059	-17.6424	2.28584e-19	7.16668e-18
ENSG00000078269	-3.88497	8.17119	-13.4262	2.29649e-19	7.18715e-18
ENSG00000240809	5.78143	2.52031	17.6627	2.29967e-19	7.18715e-18
ENSG00000067141	-1.66474	6.80141	-16.8601	2.30079e-19	7.18715e-18
ENSG00000199970	5.69674	-0.41484	21.1613	2.31291e-19	7.21623e-18
ENSG00000227726	3.90801	-0.725892	13.4204	2.34061e-19	7.29375e-18
ENSG00000107954	3.79848	3.25482	16.993	2.42836e-19	7.55802e-18
ENSG00000169744	3.09639	2.94452	13.4052	2.45963e-19	7.64605e-18
ENSG00000231490	-3.4568	0.938145	-13.5094	2.46723e-19	7.66038e-18
ENSG00000100346	5.49295	3.97835	17.6768	2.47518e-19	7.67576e-18
ENSG00000104324	-2.41537	4.88927	-15.5431	2.48571e-19	7.69909e-18
ENSG00000136144	-1.58827	6.32506	-17.3779	2.49458e-19	7.71724e-18
ENSG00000183023	2.87979	7.01691	15.9618	2.51782e-19	7.77972e-18
ENSG00000136541	-4.94768	5.76146	-13.3975	2.5222e-19	7.78388e-18
ENSG00000181773	3.58757	0.668054	13.4913	2.59058e-19	7.98529e-18
ENSG00000001167	-2.00252	5.95061	-15.7172	2.60463e-19	8.01896e-18
ENSG00000178722	-4.44739	3.83958	-16.0041	2.64427e-19	8.1312e-18
ENSG00000152932	3.5487	5.02176	19.4425	2.67347e-19	8.21113e-18
ENSG00000279146	3.19053	1.65642	13.4606	2.7146e-19	8.32747e-18
ENSG00000123700	-3.45554	5.34507	-15.74	2.71815e-19	8.32841e-18
ENSG00000200486	6.81863	0.266591	19.1637	2.75227e-19	8.42287e-18
ENSG00000180739	-5.3004	3.11916	-13.3697	2.76228e-19	8.44341e-18
ENSG00000117691	-1.98926	4.60142	-17.6601	2.79056e-19	8.5197e-18
ENSG00000019505	4.80309	3.408	17.5281	2.85064e-19	8.69275e-18
ENSG00000134716	-4.72384	4.33262	-13.357	2.87864e-19	8.7677e-18
ENSG00000108239	-2.23127	6.43737	-16.4716	2.89087e-19	8.79451e-18
ENSG00000110002	2.58964	4.82645	24.307	2.89922e-19	8.80944e-18
ENSG00000256463	-4.68948	2.58863	-13.3489	2.95641e-19	8.97255e-18
ENSG00000011347	5.84347	4.54693	16.9485	3.00526e-19	9.11002e-18
ENSG00000122012	4.16507	5.18305	17.216	3.06725e-19	9.28695e-18
ENSG00000226717	4.62148	-1.37287	14.9685	3.12781e-19	9.45912e-18
ENSG00000135547	-4.1067	2.07067	-13.3277	3.16849e-19	9.57086e-18
ENSG00000176769	6.25448	1.28405	18.1693	3.20955e-19	9.68348e-18
ENSG00000113327	4.23802	4.23347	22.0266	3.22861e-19	9.7295e-18
ENSG00000118307	3.17664	2.52902	19.5726	3.24809e-19	9.77671e-18
ENSG00000080819	-2.35649	6.56265	-18.9309	3.28548e-19	9.87766e-18
ENSG00000143630	3.08949	4.21408	21.332	3.32925e-19	9.9975e-18
ENSG00000264522	-2.53163	7.23393	-16.1505	3.3337e-19	9.99916e-18
ENSG00000169085	-2.53126	2.87281	-13.4127	3.3626e-19	1.00705e-17
ENSG00000199767	3.84498	-2.27512	14.6561	3.36534e-19	1.00705e-17
ENSG00000116396	2.62771	5.21283	13.3078	3.38182e-19	1.0108e-17
ENSG00000071991	-5.76603	3.07075	-17.8734	3.53096e-19	1.05414e-17
ENSG00000244062	-5.06966	4.54654	-13.2917	3.56511e-19	1.06233e-17
ENSG00000176658	-2.64846	6.39855	-16.8019	3.56669e-19	1.06233e-17
ENSG00000156687	5.56281	3.52001	17.8667	3.66462e-19	1.09024e-17
ENSG00000087116	3.15396	4.08035	20.4463	3.72854e-19	1.10796e-17
ENSG00000126822	-4.34247	7.33424	-16.68	3.74942e-19	1.11288e-17
ENSG00000149970	3.23637	6.0474	21.4347	3.77125e-19	1.11806e-17
ENSG00000183837	4.43712	5.057	20.0471	3.8101e-19	1.12828e-17
ENSG00000160679	-1.11566	5.97803	-13.3683	3.82608e-19	1.1317e-17
ENSG00000183317	3.41738	4.91309	17.2659	4.04095e-19	1.19324e-17
ENSG00000101849	-2.10855	4.81433	-13.2534	4.04345e-19	1.19324e-17
ENSG00000175985	5.03103	1.98783	16.4526	4.17109e-19	1.22949e-17
ENSG00000178796	4.29921	-0.373116	13.2359	4.28242e-19	1.26085e-17
ENSG00000104375	-1.75248	4.64108	-13.2261	4.42327e-19	1.30083e-17
ENSG00000114948	2.71482	6.15452	19.6216	4.50562e-19	1.32353e-17
ENSG00000270419	-2.42177	4.01769	-17.7342	4.56783e-19	1.34026e-17
ENSG00000260232	4.67669	0.782374	16.8057	4.63849e-19	1.35944e-17
ENSG00000185278	-2.0727	6.90055	-17.8286	4.66449e-19	1.3655e-17
ENSG00000258913	5.67212	-0.411133	17.5839	4.67857e-19	1.36721e-17
ENSG00000237517	4.77834	2.5577	17.7556	4.68413e-19	1.36721e-17
ENSG00000187239	-2.08504	8.81196	-16.3702	4.68634e-19	1.36721e-17
ENSG00000144331	5.50801	1.79148	17.3617	4.69336e-19	1.3677e-17
ENSG00000261675	3.38727	1.47758	16.9324	4.73148e-19	1.37661e-17
ENSG00000196220	1.46208	8.26018	20.6623	4.73886e-19	1.37661e-17
ENSG00000169884	5.74722	0.40242	17.9996	4.74008e-19	1.37661e-17
ENSG00000231312	3.0259	4.97478	23.9351	4.74942e-19	1.37776e-17
ENSG00000242808	-3.54036	7.15105	-15.7208	4.7558e-19	1.37805e-17
ENSG00000107731	-2.26757	6.37163	-13.2007	4.80802e-19	1.39161e-17
ENSG00000198822	-2.45141	5.55355	-15.8161	4.8197e-19	1.39342e-17
ENSG00000157734	-4.02774	4.78955	-16.232	4.83594e-19	1.39653e-17
ENSG00000235711	4.84484	0.981555	15.8617	4.92662e-19	1.42112e-17
ENSG00000124406	-2.24009	8.45398	-16.1512	4.94641e-19	1.42522e-17
ENSG00000185842	3.41695	4.66264	17.9152	5.11617e-19	1.47248e-17
ENSG00000187147	-3.07571	8.11156	-16.1749	5.13979e-19	1.47762e-17
ENSG00000230444	4.53362	-1.57671	13.1782	5.17811e-19	1.48697e-17
ENSG00000131089	1.17	6.89386	17.4808	5.22182e-19	1.49784e-17
ENSG00000198948	-2.38084	5.74986	-13.2726	5.28438e-19	1.51409e-17
ENSG00000264845	4.10576	0.704076	13.1642	5.42171e-19	1.5517e-17
ENSG00000177511	3.50415	4.31029	19.3999	5.43314e-19	1.55324e-17
ENSG00000074356	-1.5511	7.83593	-17.0835	5.45124e-19	1.55667e-17
ENSG00000129158	1.30908	4.86	17.564	5.4863e-19	1.56494e-17
ENSG00000124496	1.78637	4.57821	13.16	5.49843e-19	1.56666e-17
ENSG00000127561	4.16963	3.00411	18.5349	5.54242e-19	1.57743e-17
ENSG00000139263	-2.80071	3.3823	-15.4302	5.55665e-19	1.57973e-17
ENSG00000047365	-2.73397	7.58535	-13.152	5.64487e-19	1.60303e-17
ENSG00000242861	-5.28446	0.646741	-13.1434	5.80767e-19	1.64744e-17
ENSG00000163485	-2.45349	5.0388	-13.1409	5.85561e-19	1.6592e-17
ENSG00000220305	-1.78593	2.22276	-13.2385	5.91684e-19	1.6747e-17
ENSG00000250007	4.03771	0.176333	15.1106	6.0082e-19	1.69865e-17
ENSG00000151376	2.36808	5.49723	17.6157	6.01474e-19	1.69865e-17
ENSG00000140015	3.98692	3.14164	16.8279	6.04833e-19	1.70625e-17
ENSG00000204282	-5.36494	2.28021	-13.1269	6.13222e-19	1.72802e-17
ENSG00000173821	-2.95618	8.16482	-13.1264	6.14207e-19	1.72889e-17
ENSG00000186297	5.67065	2.36639	15.3145	6.25408e-19	1.75752e-17
ENSG00000170085	1.8136	4.82591	15.796	6.2575e-19	1.75752e-17
ENSG00000223694	2.57192	2.01407	13.1204	6.26522e-19	1.75776e-17
ENSG00000177181	2.89225	3.79603	25.3501	6.32014e-19	1.77123e-17
ENSG00000123636	-2.09894	9.43382	-17.3559	6.36675e-19	1.78234e-17
ENSG00000201907	6.41288	2.2549	18.1609	6.44882e-19	1.80335e-17
ENSG00000204138	-1.6461	6.3761	-16.6569	6.57004e-19	1.83524e-17
ENSG00000198719	-2.53445	4.4334	-16.4271	6.66057e-19	1.8585e-17
ENSG00000055163	1.27569	7.31771	15.4296	6.67703e-19	1.86107e-17
ENSG00000158683	2.28916	4.08025	21.159	6.73713e-19	1.87578e-17
ENSG00000148541	-1.88396	7.43765	-15.8543	6.9273e-19	1.92663e-17
ENSG00000258122	4.40383	-1.41986	16.7035	6.95016e-19	1.93089e-17
ENSG00000207630	4.67194	-2.15866	17.1263	6.97389e-19	1.93539e-17
ENSG00000188641	-2.54476	6.50284	-13.0863	7.01097e-19	1.94166e-17
ENSG00000232504	-4.37731	3.72798	-16.13	7.01165e-19	1.94166e-17
ENSG00000162409	1.66672	5.44385	17.5184	7.05516e-19	1.9516e-17
ENSG00000173706	-3.39052	5.19059	-13.0828	7.09302e-19	1.95856e-17
ENSG00000148204	-5.23418	2.90184	-17.8543	7.09561e-19	1.95856e-17
ENSG00000117266	-4.03968	8.56338	-13.0809	7.13748e-19	1.96799e-17
ENSG00000273032	4.88722	2.45727	19.2388	7.22426e-19	1.98831e-17
ENSG00000124374	-2.27372	3.60149	-17.4789	7.22668e-19	1.98831e-17
ENSG00000185053	2.97791	3.20428	15.2881	7.33905e-19	2.01706e-17
ENSG00000186648	3.41747	5.47782	18.3616	7.70101e-19	2.11427e-17
ENSG00000170382	2.82389	4.39861	18.1233	7.71729e-19	2.11647e-17
ENSG00000124126	-3.69063	7.59491	-17.3433	7.96864e-19	2.18307e-17
ENSG00000223572	4.68447	2.92458	21.138	8.14429e-19	2.2288e-17
ENSG00000279878	6.08359	0.0553853	16.5737	8.20095e-19	2.23981e-17
ENSG00000179909	1.71621	5.05664	13.1279	8.20201e-19	2.23981e-17
ENSG00000113296	-1.83783	4.76362	-15.1748	8.23722e-19	2.24703e-17
ENSG00000124749	3.79554	4.21183	18.7957	8.44211e-19	2.30048e-17
ENSG00000186951	-1.68136	4.6987	-13.1287	8.45329e-19	2.30107e-17
ENSG00000008311	-2.72137	6.23735	-15.7147	8.46585e-19	2.30204e-17
ENSG00000137766	5.3065	5.51716	15.6723	8.52561e-19	2.31532e-17
ENSG00000279811	-4.72221	6.7592	-13.0269	8.53422e-19	2.31532e-17
ENSG00000113763	3.88536	3.5332	17.4609	8.54221e-19	2.31532e-17
ENSG00000261329	-6.06387	2.07382	-13.0264	8.55081e-19	2.31532e-17
ENSG00000154548	3.25525	2.34055	17.132	8.56742e-19	2.31736e-17
ENSG00000137941	-1.86082	8.92935	-15.7077	8.6037e-19	2.32472e-17
ENSG00000072133	3.15238	3.50293	16.6937	8.65071e-19	2.33496e-17
ENSG00000166159	5.4884	2.14917	17.1753	8.68902e-19	2.34283e-17
ENSG00000166073	2.8853	3.28256	19.6754	8.71198e-19	2.34656e-17
ENSG00000202188	5.88057	-0.377957	18.2411	8.82276e-19	2.3739e-17
ENSG00000152894	-2.29005	6.77003	-15.2799	8.89175e-19	2.3886e-17
ENSG00000166086	-2.33774	6.5131	-15.6485	8.89605e-19	2.3886e-17
ENSG00000132122	-2.18434	5.61004	-14.908	9.06318e-19	2.42872e-17
ENSG00000235823	-2.97698	5.35368	-18.1547	9.06445e-19	2.42872e-17
ENSG00000167123	-4.60865	9.01961	-17.0968	9.12386e-19	2.44209e-17
ENSG00000148680	4.46767	1.48219	16.9883	9.21243e-19	2.46322e-17
ENSG00000141338	-5.16948	6.01668	-12.9998	9.3366e-19	2.49382e-17
ENSG00000164398	2.03154	6.31411	13.0851	9.38288e-19	2.50357e-17
ENSG00000136158	-2.29562	4.19161	-12.9885	9.69373e-19	2.58382e-17
ENSG00000169255	2.16722	4.34265	16.9005	9.7352e-19	2.59218e-17
ENSG00000100181	-3.88776	4.10535	-16.0337	9.74607e-19	2.59237e-17
ENSG00000075711	-2.19199	8.45488	-16.6247	9.84717e-19	2.61655e-17
ENSG00000171160	1.51571	3.49998	15.1397	9.88284e-19	2.62331e-17
ENSG00000235903	-2.37875	5.25013	-18.9184	9.94028e-19	2.63582e-17
ENSG00000199960	6.27657	1.93731	17.9406	1.01444e-18	2.68718e-17
ENSG00000119950	-1.64545	6.5741	-18.2249	1.01972e-18	2.69837e-17
ENSG00000258725	2.31303	1.25721	12.9714	1.02614e-18	2.71256e-17
ENSG00000135525	-2.57371	9.27445	-17.5489	1.03669e-18	2.73604e-17
ENSG00000093072	-2.1513	3.35683	-13.0658	1.03716e-18	2.73604e-17
ENSG00000201482	6.15054	-0.367296	17.6778	1.04363e-18	2.75027e-17
ENSG00000163697	-1.26759	7.50493	-12.9659	1.04483e-18	2.75059e-17
ENSG00000179178	-5.45239	1.47086	-12.9654	1.04676e-18	2.75285e-17
ENSG00000165434	3.23844	4.58838	18.3016	1.04958e-18	2.7561e-17
ENSG00000197753	4.55996	1.17789	15.8524	1.05015e-18	2.7561e-17
ENSG00000101180	5.39275	0.920512	15.3428	1.05612e-18	2.76893e-17
ENSG00000227681	5.52292	0.311481	16.5765	1.06196e-18	2.7814e-17
ENSG00000168781	1.47521	5.16718	17.2422	1.08448e-18	2.83749e-17
ENSG00000286220	-5.01024	3.58265	-16.3382	1.08708e-18	2.84138e-17
ENSG00000145198	6.0223	3.25724	18.8651	1.09817e-18	2.86744e-17
ENSG00000174473	5.36645	4.2491	16.9705	1.11532e-18	2.90926e-17
ENSG00000138622	5.09445	2.37598	16.1881	1.1415e-18	2.97452e-17
ENSG00000213186	-4.55588	2.8577	-16.4691	1.14352e-18	2.97634e-17
ENSG00000187773	-4.89552	2.60279	-16.1082	1.14452e-18	2.97634e-17
ENSG00000187475	-5.16617	-1.1053	-15.8024	1.15343e-18	2.99646e-17
ENSG00000103404	-1.3538	6.99438	-15.9727	1.16279e-18	3.01772e-17
ENSG00000188352	2.25978	6.14404	19.7258	1.16922e-18	3.03134e-17
ENSG00000188379	-4.95123	-1.00918	-16.5083	1.17902e-18	3.05354e-17
ENSG00000107745	1.47292	6.08045	16.7361	1.18017e-18	3.05354e-17
ENSG00000165097	-1.19993	5.14231	-13.0221	1.18379e-18	3.05981e-17
ENSG00000120729	-3.62412	0.352168	-12.9257	1.19438e-18	3.08408e-17
ENSG00000178425	-2.46277	5.20257	-15.3378	1.20591e-18	3.1107e-17
ENSG00000101298	3.03739	5.30066	12.9207	1.21434e-18	3.12932e-17
ENSG00000176788	2.57218	5.0108	12.9891	1.22992e-18	3.16627e-17
ENSG00000179314	-1.57218	5.38378	-12.9118	1.25072e-18	3.21659e-17
ENSG00000197430	-5.80837	4.61111	-16.1676	1.27434e-18	3.27404e-17
ENSG00000164106	-3.61217	1.77466	-13.0003	1.28568e-18	3.29986e-17
ENSG00000197712	-3.11273	4.19155	-14.8075	1.31692e-18	3.37668e-17
ENSG00000169242	-3.67837	2.99117	-15.5998	1.33344e-18	3.41561e-17
ENSG00000281183	2.01739	4.47432	17.2824	1.3833e-18	3.5398e-17
ENSG00000253495	-4.71157	0.0997937	-12.8641	1.46648e-18	3.74752e-17
ENSG00000260019	-5.72257	0.444645	-12.96	1.4674e-18	3.74752e-17
ENSG00000026652	-2.10316	8.12866	-14.8892	1.4848e-18	3.78816e-17
ENSG00000157693	1.40476	4.85384	15.4326	1.49999e-18	3.82311e-17
ENSG00000135925	4.99575	-1.611	15.4882	1.5038e-18	3.829e-17
ENSG00000114757	-2.90402	7.92585	-14.3228	1.50829e-18	3.83663e-17
ENSG00000226239	5.64461	-0.942362	17.6448	1.54009e-18	3.91364e-17
ENSG00000149972	5.54503	2.49657	20.954	1.56985e-18	3.98531e-17
ENSG00000010818	1.52221	7.28754	12.9255	1.60627e-18	4.07373e-17
ENSG00000269386	-2.76214	3.32632	-16.6321	1.61712e-18	4.09717e-17
ENSG00000135299	3.00871	5.25236	16.8087	1.61881e-18	4.09742e-17
ENSG00000125730	-5.24791	5.69209	-12.8799	1.62317e-18	4.10439e-17
ENSG00000242082	3.70728	1.94477	17.2115	1.64982e-18	4.16767e-17
ENSG00000157259	-1.57244	7.07512	-17.936	1.67346e-18	4.22322e-17
ENSG00000091536	4.36138	3.42042	16.4695	1.6759e-18	4.22363e-17
ENSG00000084453	-5.12381	5.32134	-15.1757	1.67692e-18	4.22363e-17
ENSG00000272321	4.8717	-0.915493	15.4326	1.70534e-18	4.29098e-17
ENSG00000161681	4.69609	4.57366	18.9798	1.71739e-18	4.31706e-17
ENSG00000254270	6.43237	-0.193387	18.8069	1.72233e-18	4.32524e-17
ENSG00000245293	-3.17365	3.08836	-16.3128	1.73693e-18	4.35763e-17
ENSG00000102096	2.31951	2.07904	14.6018	1.75088e-18	4.38835e-17
ENSG00000235024	4.10302	-1.86827	14.7776	1.75892e-18	4.40418e-17
ENSG00000134291	2.78126	3.22146	16.065	1.76956e-18	4.42648e-17
ENSG00000100297	-3.91679	3.26478	-12.902	1.77381e-18	4.42849e-17
ENSG00000169330	3.18205	4.88552	15.9995	1.77381e-18	4.42849e-17
ENSG00000122729	1.71517	6.13353	18.2932	1.81396e-18	4.5243e-17
ENSG00000213057	2.21836	2.83624	14.9041	1.82808e-18	4.55507e-17
ENSG00000075035	4.23388	3.47623	18.9412	1.83031e-18	4.55621e-17
ENSG00000137642	-1.47756	8.84106	-15.1882	1.87125e-18	4.65359e-17
ENSG00000081181	2.28304	3.06878	16.4725	1.89378e-18	4.70506e-17
ENSG00000134574	-2.77569	3.05025	-15.9537	1.89659e-18	4.70748e-17
ENSG00000118160	2.52001	4.79891	17.3935	1.90311e-18	4.71909e-17
ENSG00000142959	4.2789	0.204985	12.7804	1.93937e-18	4.80435e-17
ENSG00000278041	-4.34065	4.00847	-12.7791	1.94757e-18	4.82001e-17
ENSG00000284693	-3.75499	-0.502231	-12.777	1.9617e-18	4.84748e-17
ENSG00000235806	3.55095	-2.37383	12.7768	1.96246e-18	4.84748e-17
ENSG00000132702	-4.48749	6.47373	-12.7756	1.97081e-18	4.86342e-17
ENSG00000237943	-3.8939	2.07134	-17.423	1.97459e-18	4.86805e-17
ENSG00000279803	-4.28381	2.78085	-15.997	2.00309e-18	4.93357e-17
ENSG00000125247	-2.41806	5.79535	-15.2487	2.01443e-18	4.95368e-17
ENSG00000102230	-1.76592	4.48275	-16.5524	2.01512e-18	4.95368e-17
ENSG00000163046	4.79421	3.40536	12.7683	2.0192e-18	4.95894e-17
ENSG00000186812	-1.85044	6.8491	-19.3348	2.05056e-18	5.02925e-17
ENSG00000129990	5.10312	3.19044	17.5203	2.05175e-18	5.02925e-17
ENSG00000144893	1.81206	5.95988	12.7565	2.10077e-18	5.14449e-17
ENSG00000166016	-2.48192	4.6211	-12.7497	2.14929e-18	5.25826e-17
ENSG00000176124	-4.2556	3.04417	-15.8134	2.15986e-18	5.27908e-17
ENSG00000157978	-4.48604	5.12194	-12.7441	2.18948e-18	5.34638e-17
ENSG00000256542	4.28496	-2.14027	14.8112	2.19171e-18	5.34673e-17
ENSG00000199005	3.92808	0.520982	12.8361	2.19923e-18	5.35997e-17
ENSG00000145730	3.19623	5.6232	18.5695	2.22964e-18	5.42891e-17
ENSG00000054690	-3.84923	9.96175	-15.8183	2.2545e-18	5.48423e-17
ENSG00000127412	-5.0108	2.91767	-12.8264	2.26838e-18	5.51276e-17
ENSG00000143416	-4.30048	0.583011	-12.7329	2.27357e-18	5.52014e-17
ENSG00000126733	3.41484	0.952133	15.3124	2.29188e-18	5.55932e-17
ENSG00000102760	-4.58678	2.9093	-15.3164	2.30546e-18	5.58697e-17
ENSG00000165125	-4.40441	3.84134	-12.7276	2.31455e-18	5.60371e-17
ENSG00000185352	2.82597	4.10259	16.7706	2.31938e-18	5.60567e-17
ENSG00000223403	4.18433	2.87146	17.4381	2.31974e-18	5.60567e-17
ENSG00000140600	-1.70987	6.97955	-16.1448	2.33851e-18	5.64571e-17
ENSG00000125841	1.9454	3.92901	15.1255	2.36079e-18	5.69412e-17
ENSG00000101144	-3.12156	3.26718	-12.8127	2.37732e-18	5.72861e-17
ENSG00000134569	-5.36948	5.1429	-15.1809	2.38339e-18	5.73783e-17
ENSG00000177459	4.10273	-0.0923188	12.7185	2.3864e-18	5.73968e-17
ENSG00000200478	6.09727	1.48976	18.2401	2.44035e-18	5.86394e-17
ENSG00000179420	-4.73244	1.28643	-12.7102	2.45323e-18	5.88937e-17
ENSG00000038002	-2.72195	2.59018	-14.9291	2.45732e-18	5.89366e-17
ENSG00000118733	3.7491	3.25413	15.9112	2.47646e-18	5.93402e-17
ENSG00000164124	-4.56195	6.68463	-14.9963	2.48735e-18	5.95454e-17
ENSG00000176840	5.88456	0.306645	16.3285	2.49602e-18	5.9697e-17
ENSG00000079215	-4.48108	5.51796	-12.797	2.50674e-18	5.98976e-17
ENSG00000112394	3.02128	2.65614	14.951	2.51187e-18	5.99641e-17
ENSG00000282080	4.04264	-0.404934	12.7024	2.51851e-18	6.00668e-17
ENSG00000141622	2.82014	4.07582	17.3699	2.53023e-18	6.02901e-17
ENSG00000137261	3.36299	4.44461	16.9999	2.54374e-18	6.05557e-17
ENSG00000119929	-1.60251	4.12065	-15.2819	2.56307e-18	6.09591e-17
ENSG00000228400	5.1598	-1.15697	16.0749	2.57331e-18	6.11459e-17
ENSG00000151490	3.26133	4.86752	15.6817	2.59339e-18	6.1566e-17
ENSG00000155816	1.87592	6.61748	12.6933	2.59614e-18	6.15742e-17
ENSG00000152092	1.26218	6.7737	12.6908	2.61863e-18	6.205e-17
ENSG00000196812	-2.06594	3.28447	-15.8379	2.67542e-18	6.33373e-17
ENSG00000163170	1.96312	2.75178	15.0218	2.67853e-18	6.33524e-17
ENSG00000104728	-2.73601	4.46322	-15.9258	2.70165e-18	6.38402e-17
ENSG00000167635	-1.52271	6.89449	-12.6811	2.70466e-18	6.38524e-17
ENSG00000272163	3.19189	1.91309	14.6536	2.71185e-18	6.38849e-17
ENSG00000130643	4.49633	4.10596	16.8385	2.71217e-18	6.38849e-17
ENSG00000135324	4.24003	1.29466	18.0552	2.71352e-18	6.38849e-17
ENSG00000066027	-1.91532	4.50236	-12.6773	2.74018e-18	6.44254e-17
ENSG00000069424	2.63513	5.13995	19.7544	2.74151e-18	6.44254e-17
ENSG00000243024	-2.77096	1.7792	-14.1703	2.76998e-18	6.49844e-17
ENSG00000166501	1.59683	6.94675	18.617	2.77117e-18	6.49844e-17
ENSG00000185670	-1.68658	2.7626	-12.7665	2.77291e-18	6.49844e-17
ENSG00000144847	-3.31608	5.05116	-15.02	2.80073e-18	6.55765e-17
ENSG00000072864	-4.92234	5.74341	-14.2873	2.80694e-18	6.56619e-17
ENSG00000278518	4.24322	-1.7464	14.2252	2.83434e-18	6.62424e-17
ENSG00000196517	-2.94412	4.79954	-14.9401	2.87002e-18	6.70152e-17
ENSG00000221866	3.58446	5.48869	17.4697	2.90274e-18	6.77174e-17
ENSG00000278840	4.03552	-1.91539	14.8799	2.91354e-18	6.79075e-17
ENSG00000228382	-4.46571	1.15448	-12.7507	2.92253e-18	6.80509e-17
ENSG00000100242	-3.05928	7.62125	-19.9221	2.92519e-18	6.80509e-17
ENSG00000012983	-1.70715	7.86244	-17.5056	2.92766e-18	6.80509e-17
ENSG00000135899	-4.53698	4.0276	-12.6572	2.931e-18	6.80667e-17
ENSG00000110871	-1.65416	4.36507	-12.7457	2.96707e-18	6.88419e-17
ENSG00000108784	-2.00702	3.27606	-17.4615	2.97431e-18	6.89475e-17
ENSG00000146859	-4.49955	1.94674	-12.6524	2.97917e-18	6.89976e-17
ENSG00000199712	6.28098	0.718655	17.3775	2.99092e-18	6.92073e-17
ENSG00000160014	1.84581	6.64582	16.5336	3.02887e-18	7.0022e-17
ENSG00000258520	3.89676	-1.18008	12.6471	3.03243e-18	7.00411e-17
ENSG00000182836	3.6171	2.96319	18.0444	3.07906e-18	7.10541e-17
ENSG00000116544	4.53757	3.86366	16.3329	3.08976e-18	7.1237e-17
ENSG00000225623	4.12996	-0.053773	15.3158	3.09526e-18	7.12996e-17
ENSG00000081138	5.15808	2.46491	17.2442	3.15117e-18	7.24682e-17
ENSG00000280206	-5.35477	1.72127	-12.7274	3.15165e-18	7.24682e-17
ENSG00000154263	2.91137	5.25619	19.6756	3.16443e-18	7.26967e-17
ENSG00000055813	3.77687	3.83153	18.5879	3.17011e-18	7.27619e-17
ENSG00000178082	-4.66455	2.5755	-16.9796	3.1858e-18	7.30567e-17
ENSG00000153246	4.12161	4.21161	17.0738	3.19661e-18	7.3239e-17
ENSG00000161912	-2.11902	5.2976	-15.1392	3.21035e-18	7.34881e-17
ENSG00000133083	3.40079	5.54634	16.0487	3.26318e-18	7.46307e-17
ENSG00000252837	4.91935	-1.56023	15.9848	3.28279e-18	7.50121e-17
ENSG00000164530	-5.7554	2.80572	-12.6219	3.30042e-18	7.53477e-17
ENSG00000260196	3.60189	1.32685	14.1228	3.30651e-18	7.54196e-17
ENSG00000062282	2.77156	2.14998	14.2926	3.31025e-18	7.54377e-17
ENSG00000159592	-0.982048	6.14507	-12.7047	3.34118e-18	7.60749e-17
ENSG00000251468	3.55767	0.781155	12.617	3.35583e-18	7.63406e-17
ENSG00000138028	3.11174	4.31074	15.7259	3.40643e-18	7.7423e-17
ENSG00000089091	1.03006	4.72129	12.6113	3.42027e-18	7.76685e-17
ENSG00000144815	-1.61381	6.9639	-14.6422	3.43441e-18	7.79206e-17
ENSG00000134198	4.09379	0.978328	15.2792	3.44091e-18	7.79991e-17
ENSG00000153933	1.86529	5.27316	19.7932	3.47014e-18	7.85922e-17
ENSG00000112232	2.7301	5.71628	18.5306	3.54467e-18	8.02092e-17
ENSG00000165716	2.27105	4.0526	12.6837	3.56262e-18	8.05442e-17
ENSG00000103034	2.79264	7.11064	17.4929	3.57082e-18	8.06583e-17
ENSG00000201143	6.42522	3.05145	17.8015	3.6505e-18	8.23855e-17
ENSG00000227398	1.84337	3.58855	15.5492	3.65452e-18	8.24037e-17
ENSG00000141198	2.31922	3.16585	14.3294	3.6827e-18	8.29661e-17
ENSG00000135709	2.21148	6.42523	24.6174	3.73643e-18	8.41025e-17
ENSG00000157219	5.0109	0.511801	15.0802	3.75802e-18	8.45142e-17
ENSG00000178233	4.05243	3.25737	17.4896	3.7717e-18	8.472e-17
ENSG00000141510	-1.94418	2.41979	-12.5821	3.77379e-18	8.472e-17
ENSG00000174145	5.91003	1.38392	15.2553	3.92381e-18	8.80108e-17
ENSG00000249206	4.38249	-1.95524	15.0441	4.06869e-18	9.11807e-17
ENSG00000107295	3.31581	4.08691	15.9639	4.07322e-18	9.12024e-17
ENSG00000184933	5.39915	0.199392	14.2962	4.08306e-18	9.1343e-17
ENSG00000270929	4.10673	-1.79597	12.5564	4.11576e-18	9.19941e-17
ENSG00000231185	2.4485	2.6989	15.1104	4.16855e-18	9.30928e-17
ENSG00000151914	-1.94932	12.3796	-15.3423	4.28135e-18	9.55257e-17
ENSG00000117016	4.75136	4.51001	16.4756	4.28768e-18	9.55257e-17
ENSG00000251429	-4.74767	5.10827	-15.764	4.28868e-18	9.55257e-17
ENSG00000103381	-1.88005	4.28931	-14.6956	4.30805e-18	9.58739e-17
ENSG00000172508	-5.08554	7.61265	-12.5412	4.3321e-18	9.63253e-17
ENSG00000118298	-5.19181	2.60308	-12.5338	4.44254e-18	9.86953e-17
ENSG00000077063	-1.89768	8.5474	-15.5389	4.51193e-18	1.0015e-16
ENSG00000281852	-4.53856	-1.72254	-12.5267	4.54975e-18	1.00868e-16
ENSG00000102109	2.55836	3.95705	16.5835	4.55214e-18	1.00868e-16
ENSG00000279355	-2.52922	5.42188	-12.5257	4.56544e-18	1.01075e-16
ENSG00000139200	2.76577	3.80769	14.9577	4.60983e-18	1.0197e-16
ENSG00000172350	4.00798	3.06587	18.749	4.62775e-18	1.02278e-16
ENSG00000283913	3.97994	0.824496	12.5203	4.64892e-18	1.02657e-16
ENSG00000154118	3.80705	4.17244	17.4503	4.6611e-18	1.02837e-16
ENSG00000274727	6.92579	0.101694	17.9385	4.68815e-18	1.03273e-16
ENSG00000104419	-3.44541	6.87912	-14.8788	4.68892e-18	1.03273e-16
ENSG00000119866	3.96926	4.20648	15.9068	4.69459e-18	1.03309e-16
ENSG00000154978	1.26742	4.82196	12.517	4.7011e-18	1.03364e-16
ENSG00000119283	2.63436	4.1419	17.2939	4.71418e-18	1.03562e-16
ENSG00000163482	1.53383	5.81962	18.0907	4.71866e-18	1.03572e-16
ENSG00000175772	5.06588	-0.476951	15.9721	4.73438e-18	1.03828e-16
ENSG00000257585	-4.57805	3.29932	-15.0544	4.75394e-18	1.04153e-16
ENSG00000156113	1.73839	7.44969	15.66	4.75735e-18	1.04153e-16
ENSG00000178947	2.26437	3.57201	16.2805	4.80919e-18	1.05198e-16
ENSG00000157827	-2.97052	9.62621	-15.2927	4.83225e-18	1.05613e-16
ENSG00000065609	1.97761	6.20543	21.9865	4.88227e-18	1.06615e-16
ENSG00000081479	-4.09851	7.67903	-12.5024	4.93957e-18	1.07774e-16
ENSG00000220575	4.83049	-1.06005	14.504	5.01175e-18	1.09256e-16
ENSG00000273001	3.93353	-1.25088	12.5833	5.08121e-18	1.10676e-16
ENSG00000256139	-3.08578	0.992519	-12.4933	5.09341e-18	1.10848e-16
ENSG00000070081	1.78001	5.27867	15.8613	5.11839e-18	1.11297e-16
ENSG00000174502	-4.4641	0.517149	-12.4871	5.20102e-18	1.12998e-16
ENSG00000170579	3.09585	6.37836	15.625	5.22009e-18	1.13316e-16
ENSG00000258342	-4.44231	3.90151	-14.9169	5.28488e-18	1.14625e-16
ENSG00000116266	-2.07605	6.28698	-15.8464	5.31669e-18	1.15218e-16
ENSG00000204323	-5.4617	3.27504	-12.5692	5.32346e-18	1.15267e-16
ENSG00000180423	-1.46894	3.06945	-12.4792	5.34206e-18	1.15572e-16
ENSG00000147234	3.24872	3.31766	15.0761	5.36866e-18	1.16049e-16
ENSG00000232310	-5.03482	1.59528	-15.6819	5.38088e-18	1.16215e-16
ENSG00000169668	5.18497	-1.35624	15.5656	5.39471e-18	1.16416e-16
ENSG00000257337	-2.13684	4.72479	-16.6286	5.43134e-18	1.17107e-16
ENSG00000204161	-5.30287	3.07813	-12.4731	5.45363e-18	1.17489e-16
ENSG00000242600	3.3277	1.31201	12.4728	5.46013e-18	1.1753e-16
ENSG00000176890	-3.01768	2.41129	-16.5545	5.48212e-18	1.17882e-16
ENSG00000168546	4.02329	2.91013	12.5203	5.48565e-18	1.17882e-16
ENSG00000135119	1.6322	4.53988	19.0592	5.5818e-18	1.19764e-16
ENSG00000101349	2.87771	3.15235	16.09	5.58259e-18	1.19764e-16
ENSG00000283633	-4.55746	0.864211	-12.5534	5.62452e-18	1.20562e-16
ENSG00000160678	-4.07775	3.18233	-12.5484	5.7027e-18	1.22136e-16
ENSG00000163565	-4.03972	3.74567	-12.546	5.74553e-18	1.22951e-16
ENSG00000255693	4.78128	2.26243	18.1522	5.75801e-18	1.23024e-16
ENSG00000259153	4.25374	-0.223578	12.5461	5.76201e-18	1.23024e-16
ENSG00000213468	-5.23077	2.1104	-12.4568	5.76339e-18	1.23024e-16
ENSG00000250072	-5.28617	3.18569	-12.5457	5.76824e-18	1.23025e-16
ENSG00000006831	-2.18629	5.88935	-12.5433	5.77324e-18	1.2303e-16
ENSG00000212428	5.88363	0.535192	16.5444	5.8133e-18	1.2378e-16
ENSG00000233393	-5.60473	1.43214	-15.8897	5.85967e-18	1.24664e-16
ENSG00000256443	6.75956	1.32006	15.9188	5.91663e-18	1.25771e-16
ENSG00000257183	-5.29555	-0.841041	-15.0003	5.96676e-18	1.26732e-16
ENSG00000166762	1.7834	6.91662	18.0541	6.00815e-18	1.27505e-16
ENSG00000215068	-4.74889	0.558467	-12.4442	6.01433e-18	1.27531e-16
ENSG00000185133	3.85754	2.94358	19.0387	6.06452e-18	1.28489e-16
ENSG00000168077	-4.22919	3.32895	-12.4408	6.08397e-18	1.28794e-16
ENSG00000258068	4.52429	-0.452473	14.8316	6.10449e-18	1.29122e-16
ENSG00000256870	5.75316	0.965202	16.1345	6.13959e-18	1.29757e-16
ENSG00000141542	-2.32911	5.99627	-16.1607	6.19173e-18	1.30751e-16
ENSG00000186481	2.86327	4.09938	17.3441	6.20675e-18	1.3096e-16
ENSG00000280294	2.82499	2.35305	14.7656	6.26946e-18	1.32175e-16
ENSG00000105792	2.07673	3.6854	15.8077	6.31682e-18	1.33064e-16
ENSG00000262223	-4.2805	3.61081	-16.7119	6.40028e-18	1.34711e-16
ENSG00000135069	-2.32833	3.86531	-16.8235	6.47963e-18	1.36269e-16
ENSG00000236279	5.35618	2.46392	18.3335	6.50541e-18	1.36699e-16
ENSG00000184949	2.17878	4.54519	15.4499	6.74013e-18	1.41515e-16
ENSG00000280486	-5.78448	0.426309	-15.7203	6.78925e-18	1.4243e-16
ENSG00000124251	-4.56795	2.94316	-15.7597	6.8686e-18	1.43942e-16
ENSG00000162437	2.45418	4.62677	18.0102	6.87259e-18	1.43942e-16
ENSG00000155846	2.54202	4.93145	16.8563	6.88268e-18	1.44036e-16
ENSG00000169116	3.85971	2.895	17.6369	7.04065e-18	1.47221e-16
ENSG00000185070	2.56568	5.6508	16.2779	7.17727e-18	1.49956e-16
ENSG00000106125	2.59088	2.14847	13.3838	7.24324e-18	1.51211e-16
ENSG00000157680	1.3737	6.71836	12.3837	7.38595e-18	1.54064e-16
ENSG00000154277	2.1104	7.21596	16.7221	7.44017e-18	1.55069e-16
ENSG00000096063	0.869449	6.14831	14.2341	7.48923e-18	1.55965e-16
ENSG00000107331	-3.32355	10.1546	-16.1752	7.5141e-18	1.56356e-16
ENSG00000270885	3.44546	2.13162	17.3937	7.52468e-18	1.56449e-16
ENSG00000106537	3.47022	2.51108	17.7316	7.55653e-18	1.56983e-16
ENSG00000278872	5.8673	-0.782806	16.2748	7.58993e-18	1.57549e-16
ENSG00000151468	1.70352	2.6843	13.6249	7.61782e-18	1.58e-16
ENSG00000274080	5.68227	0.988634	16.9255	7.65711e-18	1.58687e-16
ENSG00000223516	4.91799	-1.78095	13.9492	7.71858e-18	1.59831e-16
ENSG00000116983	4.39356	4.02012	15.6001	7.78325e-18	1.6104e-16
ENSG00000137221	-2.83221	6.92717	-17.2795	7.79332e-18	1.61119e-16
ENSG00000102271	-4.34999	3.17253	-15.7304	7.81239e-18	1.61382e-16
ENSG00000243232	1.71257	3.76007	14.8131	7.86561e-18	1.62351e-16
ENSG00000248719	-2.91934	0.779954	-13.6942	7.99319e-18	1.6479e-16
ENSG00000207816	6.15774	1.53218	15.416	7.99664e-18	1.6479e-16
ENSG00000154478	4.06772	2.95413	15.626	8.01633e-18	1.65063e-16
ENSG00000198794	1.67717	6.11973	16.8627	8.13244e-18	1.67319e-16
ENSG00000112183	3.82277	0.358005	12.3547	8.14999e-18	1.67546e-16
ENSG00000068885	-2.36662	5.43327	-16.8549	8.19399e-18	1.68315e-16
ENSG00000164715	1.61189	6.77664	20.9722	8.21119e-18	1.68533e-16
ENSG00000258399	3.68328	3.11774	17.1809	8.25153e-18	1.69226e-16
ENSG00000239344	4.04289	-0.107645	13.6155	8.31853e-18	1.70463e-16
ENSG00000283050	-1.77663	4.41094	-14.4367	8.36955e-18	1.71372e-16
ENSG00000118515	-2.55984	6.3053	-15.9501	8.5024e-18	1.73953e-16
ENSG00000271147	2.00225	3.54412	15.0238	8.54427e-18	1.7467e-16
ENSG00000004660	2.87718	4.38337	19.2098	8.59192e-18	1.75504e-16
ENSG00000226642	4.34458	1.69729	15.4933	8.63814e-18	1.76307e-16
ENSG00000143507	-2.52473	3.79388	-16.533	8.66258e-18	1.76666e-16
ENSG00000145087	3.1384	5.9663	20.5107	8.7131e-18	1.77555e-16
ENSG00000170419	3.65144	3.91142	17.7452	8.72305e-18	1.77563e-16
ENSG00000200757	5.64091	2.06632	17.7835	8.7274e-18	1.77563e-16
ENSG00000214253	-1.67576	5.32126	-14.7085	8.77831e-18	1.78457e-16
ENSG00000215158	-1.92236	6.03582	-20.3223	8.81109e-18	1.78982e-16
ENSG00000073969	2.07612	5.31227	18.7569	8.8477e-18	1.79583e-16
ENSG00000277883	5.3557	0.189237	17.1309	8.87245e-18	1.79943e-16
ENSG00000125510	3.14638	2.64959	14.2041	8.98802e-18	1.82143e-16
ENSG00000159753	3.78747	2.14064	16.4435	9.00696e-18	1.82382e-16
ENSG00000234690	-3.72273	1.50747	-12.3225	9.09197e-18	1.83958e-16
ENSG00000188707	2.63859	2.06997	13.9477	9.1241e-18	1.84462e-16
ENSG00000166896	2.51441	1.023	12.3204	9.15941e-18	1.8503e-16
ENSG00000078487	-1.97628	4.98219	-15.6281	9.18544e-18	1.8541e-16
ENSG00000148468	-1.43525	7.40772	-12.3193	9.19271e-18	1.8541e-16
ENSG00000144959	2.79541	3.19889	19.4435	9.20513e-18	1.85515e-16
ENSG00000234423	4.0453	0.484992	15.611	9.34426e-18	1.88171e-16
ENSG00000170074	5.39809	2.76634	15.6516	9.35569e-18	1.88253e-16
ENSG00000203797	-5.03907	1.21878	-12.3123	9.41465e-18	1.89291e-16
ENSG00000215475	4.64006	1.35086	18.413	9.45613e-18	1.89975e-16
ENSG00000277778	-4.26999	3.09439	-15.8188	9.54836e-18	1.91678e-16
ENSG00000142686	1.43848	4.8805	18.3744	9.70041e-18	1.94507e-16
ENSG00000196338	-1.37224	5.60037	-15.1892	9.70447e-18	1.94507e-16
ENSG00000178826	-3.91145	1.3661	-12.3027	9.72681e-18	1.94802e-16
ENSG00000145888	5.08823	0.983449	18.753	9.76128e-18	1.9534e-16
ENSG00000182870	5.42461	2.59547	18.7488	9.84536e-18	1.96869e-16
ENSG00000142408	3.52177	6.42432	17.3477	1.00264e-17	2.00333e-16
ENSG00000253973	4.27132	-1.05102	12.293	1.00551e-17	2.00748e-16
ENSG00000176533	-3.14329	5.39528	-13.8229	1.01446e-17	2.02379e-16
ENSG00000158747	2.69014	2.47166	12.2867	1.0271e-17	2.04741e-16
ENSG00000105717	2.75459	2.51435	14.437	1.03215e-17	2.05587e-16
ENSG00000143067	2.78699	3.9599	15.5621	1.03394e-17	2.05784e-16
ENSG00000184226	-2.02877	10.0688	-17.4663	1.04304e-17	2.07376e-16
ENSG00000227392	-6.25032	1.52141	-15.2788	1.04356e-17	2.07376e-16
ENSG00000164076	5.99645	3.46112	15.6764	1.04911e-17	2.08317e-16
ENSG00000277425	-2.79218	0.962433	-12.2789	1.05478e-17	2.09266e-16
ENSG00000136040	2.41883	4.93922	16.9879	1.05552e-17	2.09266e-16
ENSG00000076258	-4.85033	0.976651	-12.3643	1.05848e-17	2.09691e-16
ENSG00000272556	-2.43275	3.42586	-15.4522	1.06523e-17	2.10864e-16
ENSG00000174938	2.03771	5.42076	17.2549	1.08085e-17	2.13791e-16
ENSG00000147588	-4.43475	3.73334	-12.3519	1.09841e-17	2.17083e-16
ENSG00000125703	-2.27617	5.33205	-15.6582	1.09918e-17	2.17083e-16
ENSG00000224955	4.8588	-1.3125	13.6509	1.1001e-17	2.17096e-16
ENSG00000134222	-3.94424	5.80743	-14.4201	1.10197e-17	2.17297e-16
ENSG00000254746	5.20018	-0.608986	14.7382	1.10334e-17	2.17401e-16
ENSG00000279829	2.90049	0.201968	12.3482	1.1131e-17	2.19155e-16
ENSG00000160310	-1.30243	6.98731	-14.6428	1.12735e-17	2.2177e-16
ENSG00000104267	-2.98574	4.74429	-15.3466	1.12811e-17	2.2177e-16
ENSG00000166845	-3.59327	2.96354	-14.5824	1.13487e-17	2.22928e-16
ENSG00000198910	4.82627	4.03645	17.231	1.15386e-17	2.26484e-16
ENSG00000135912	-1.56565	6.12509	-12.3327	1.16655e-17	2.288e-16
ENSG00000143514	-2.65295	5.06938	-12.2422	1.19578e-17	2.34352e-16
ENSG00000112218	3.48389	2.5661	16.8839	1.1987e-17	2.34745e-16
ENSG00000116044	-2.06516	5.39363	-15.4253	1.20625e-17	2.36044e-16
ENSG00000244694	5.1958	2.88547	15.0931	1.21617e-17	2.37803e-16
ENSG00000159228	-2.7213	4.75403	-18.0829	1.24012e-17	2.423e-16
ENSG00000173727	-2.82087	0.960696	-12.2291	1.25016e-17	2.44076e-16
ENSG00000213088	3.92629	0.815041	13.9499	1.25807e-17	2.45434e-16
ENSG00000259335	-3.98584	-1.75462	-12.3092	1.26232e-17	2.46075e-16
ENSG00000279543	5.23149	0.339699	16.6013	1.26849e-17	2.4709e-16
ENSG00000233930	3.98378	3.1417	16.0521	1.28749e-17	2.506e-16
ENSG00000124493	6.43441	2.93941	15.5041	1.3055e-17	2.53914e-16
ENSG00000197444	3.52687	5.28506	19.0204	1.31925e-17	2.56394e-16
ENSG00000172673	-4.15563	-0.91188	-12.2126	1.32283e-17	2.56895e-16
ENSG00000107104	-2.33532	6.60718	-14.3008	1.34939e-17	2.61853e-16
ENSG00000249306	-3.98237	1.99132	-14.7672	1.35183e-17	2.62128e-16
ENSG00000237742	-4.60355	-0.805573	-12.2026	1.36906e-17	2.65268e-16
ENSG00000181072	5.49601	3.4468	12.1991	1.38519e-17	2.68192e-16
ENSG00000267339	-4.00405	1.92903	-16.4658	1.39155e-17	2.69219e-16
ENSG00000260911	-2.70289	2.82633	-14.3221	1.41894e-17	2.74311e-16
ENSG00000128309	-3.01983	3.30226	-16.1654	1.42575e-17	2.75419e-16
ENSG00000233040	2.98316	0.418074	12.2662	1.43009e-17	2.7605e-16
ENSG00000129422	-2.6642	7.73311	-14.3517	1.45879e-17	2.81377e-16
ENSG00000254712	5.58743	-0.0357212	15.7196	1.47995e-17	2.85245e-16
ENSG00000251890	4.27414	-1.41239	13.8454	1.57023e-17	3.02417e-16
ENSG00000259194	-4.13476	2.02094	-14.3116	1.60773e-17	3.09407e-16
ENSG00000165548	2.49304	5.04928	15.3492	1.61384e-17	3.10349e-16
ENSG00000130558	2.20865	5.03284	15.5629	1.62666e-17	3.1258e-16
ENSG00000173898	3.61602	5.98501	20.1574	1.63964e-17	3.14837e-16
ENSG00000137106	-1.41066	5.86489	-17.2891	1.64475e-17	3.15583e-16
ENSG00000251138	-5.52569	1.85393	-16.2883	1.66843e-17	3.19887e-16
ENSG00000128311	-3.9862	1.22772	-14.348	1.68934e-17	3.23653e-16
ENSG00000264706	4.43033	-2.35659	14.8299	1.71231e-17	3.27809e-16
ENSG00000281106	2.2961	2.04681	13.4263	1.73103e-17	3.31146e-16
ENSG00000135540	-3.16643	3.54984	-14.9838	1.74923e-17	3.34377e-16
ENSG00000225662	4.37375	-0.169095	14.1566	1.75873e-17	3.35943e-16
ENSG00000250686	3.14834	1.35934	17.0264	1.7667e-17	3.37062e-16
ENSG00000162337	-3.31585	3.14697	-12.2118	1.76722e-17	3.37062e-16
ENSG00000255790	4.6295	-1.02131	14.5372	1.77669e-17	3.38615e-16
ENSG00000101210	2.89523	6.2102	15.9683	1.77807e-17	3.38626e-16
ENSG00000128645	-5.63897	1.14679	-12.1255	1.78271e-17	3.39258e-16
ENSG00000203865	-2.58108	2.97888	-16.4859	1.79041e-17	3.40438e-16
ENSG00000019144	-3.57232	9.35709	-15.9022	1.79157e-17	3.40438e-16
ENSG00000108379	2.6484	2.61324	13.6444	1.80578e-17	3.42883e-16
ENSG00000172159	2.94084	3.86	15.5113	1.80753e-17	3.42962e-16
ENSG00000231607	-3.90513	3.61984	-14.2356	1.83195e-17	3.47338e-16
ENSG00000155368	-2.08816	3.80871	-14.4452	1.83601e-17	3.4785e-16
ENSG00000100225	-1.59305	7.19558	-15.2372	1.85591e-17	3.51361e-16
ENSG00000063015	2.89062	4.57631	16.4178	1.85992e-17	3.51806e-16
ENSG00000161298	1.53646	6.18126	20.9324	1.86149e-17	3.51806e-16
ENSG00000117791	2.39496	3.30442	12.1527	1.86238e-17	3.51806e-16
ENSG00000222068	-4.24897	0.175524	-12.1925	1.88111e-17	3.55083e-16
ENSG00000134986	2.51824	4.00797	17.5281	1.89917e-17	3.58228e-16
ENSG00000179542	3.02134	3.76447	18.1409	1.92683e-17	3.63177e-16
ENSG00000255794	5.22554	3.06116	15.333	1.94179e-17	3.65728e-16
ENSG00000226454	3.30337	1.4738	14.7539	1.95647e-17	3.68221e-16
ENSG00000109062	-3.85361	3.48237	-12.0974	1.96271e-17	3.68885e-16
ENSG00000150667	3.04631	2.3074	18.5222	1.96338e-17	3.68885e-16
ENSG00000196090	3.0214	5.56725	16.0506	1.96432e-17	3.68885e-16
ENSG00000186212	4.05739	-0.780178	12.0969	1.96651e-17	3.69027e-16
ENSG00000142549	3.63723	3.90498	17.8335	1.96872e-17	3.69171e-16
ENSG00000213363	2.7995	1.17866	12.0952	1.97753e-17	3.70552e-16
ENSG00000272564	-4.50417	1.19077	-13.8147	1.98723e-17	3.72097e-16
ENSG00000176435	-3.58686	2.13841	-14.0721	1.99177e-17	3.72675e-16
ENSG00000075043	3.6184	6.20855	17.9001	2.04586e-17	3.82515e-16
ENSG00000047597	3.57529	1.0019	13.8919	2.04748e-17	3.8254e-16
ENSG00000277829	-5.46066	1.41554	-12.0819	2.07037e-17	3.86535e-16
ENSG00000235513	-3.91778	2.78529	-14.2741	2.08669e-17	3.89298e-16
ENSG00000091428	2.18735	6.06892	17.0108	2.0887e-17	3.89389e-16
ENSG00000283162	2.78386	1.44652	14.8495	2.09174e-17	3.89672e-16
ENSG00000227110	-2.72851	4.68594	-14.3097	2.11302e-17	3.93351e-16
ENSG00000230960	-5.38963	-0.930107	-15.6432	2.11551e-17	3.93527e-16
ENSG00000250510	2.44704	3.97596	15.904	2.12254e-17	3.94548e-16
ENSG00000065989	3.04961	4.54866	15.9102	2.14425e-17	3.98295e-16
ENSG00000250198	-5.54222	1.77426	-15.2669	2.1511e-17	3.99278e-16
ENSG00000134996	-2.01921	4.10886	-13.7531	2.18833e-17	4.05894e-16
ENSG00000095752	5.38746	-0.276424	15.8726	2.19183e-17	4.06014e-16
ENSG00000158560	1.58334	7.13131	16.6864	2.19214e-17	4.06014e-16
ENSG00000200949	6.07784	3.804	18.4237	2.22025e-17	4.10922e-16
ENSG00000111249	4.51627	4.01206	15.1097	2.22593e-17	4.11676e-16
ENSG00000274659	4.71904	-1.51955	15.2488	2.23968e-17	4.13921e-16
ENSG00000117682	1.6752	5.94685	17.7719	2.24404e-17	4.14428e-16
ENSG00000198673	2.15523	4.93637	14.5451	2.25489e-17	4.16131e-16
ENSG00000259735	-4.6993	-0.857701	-12.1391	2.25948e-17	4.16678e-16
ENSG00000205683	-3.01897	5.40674	-12.053	2.28635e-17	4.21331e-16
ENSG00000144550	5.08021	2.16635	16.6019	2.31517e-17	4.26334e-16
ENSG00000183908	4.05188	2.17376	19.8735	2.33494e-17	4.29666e-16
ENSG00000214050	2.77979	2.57513	17.5606	2.33868e-17	4.30045e-16
ENSG00000182621	2.55555	6.70894	17.5044	2.35634e-17	4.32982e-16
ENSG00000182674	5.24536	1.53185	16.6214	2.36839e-17	4.34884e-16
ENSG00000158816	5.15072	2.14697	15.4673	2.39364e-17	4.39206e-16
ENSG00000110315	-2.07333	4.83464	-15.2803	2.39998e-17	4.40054e-16
ENSG00000201155	3.80466	-1.76521	13.6042	2.41611e-17	4.42694e-16
ENSG00000286084	3.84634	0.323987	12.8904	2.48858e-17	4.55647e-16
ENSG00000184185	4.69729	0.361761	12.0274	2.49658e-17	4.56785e-16
ENSG00000138653	5.01622	0.219899	16.3648	2.5127e-17	4.59406e-16
ENSG00000285269	-4.66544	1.68252	-15.023	2.53196e-17	4.62597e-16
ENSG00000145864	4.32719	3.86429	18.9192	2.53903e-17	4.63558e-16
ENSG00000121871	2.17074	4.14714	15.5133	2.54658e-17	4.64605e-16
ENSG00000231427	-5.64984	0.448031	-12.0178	2.58024e-17	4.70413e-16
ENSG00000105855	-2.42811	5.43385	-12.0931	2.62499e-17	4.7823e-16
ENSG00000246662	2.3279	1.33238	12.0094	2.65622e-17	4.83575e-16
ENSG00000125895	5.38567	1.59374	17.0346	2.66876e-17	4.85513e-16
ENSG00000086300	2.50258	3.47548	16.4608	2.68e-17	4.87213e-16
ENSG00000186462	2.14694	4.25686	16.0711	2.69837e-17	4.9011e-16
ENSG00000248485	3.51699	1.86105	13.9798	2.69977e-17	4.9011e-16
ENSG00000215218	3.05492	2.504	15.6066	2.70284e-17	4.9032e-16
ENSG00000277449	2.53595	1.5021	13.7052	2.71167e-17	4.91573e-16
ENSG00000151812	5.39152	1.12284	15.1735	2.74172e-17	4.96413e-16
ENSG00000175344	3.42822	2.1373	14.9852	2.74224e-17	4.96413e-16
ENSG00000151229	2.62187	5.0654	18.1024	2.74538e-17	4.9663e-16
ENSG00000264843	-4.20569	-2.09404	-13.4931	2.77686e-17	5.01971e-16
ENSG00000120262	2.94376	2.40095	14.6041	2.78659e-17	5.03374e-16
ENSG00000186231	-1.76255	5.69137	-16.6946	2.81429e-17	5.0802e-16
ENSG00000172020	2.73736	4.12669	15.2766	2.8176e-17	5.08259e-16
ENSG00000165194	2.14135	4.23869	11.9918	2.82286e-17	5.0885e-16
ENSG00000188859	2.14807	2.81812	14.115	2.8288e-17	5.09495e-16
ENSG00000164100	3.07547	2.98176	15.6854	2.83042e-17	5.09495e-16
ENSG00000250140	-4.92624	1.48546	-11.9902	2.83837e-17	5.10567e-16
ENSG00000214013	-1.6968	6.47956	-13.9049	2.86149e-17	5.14366e-16
ENSG00000175305	-3.49609	3.08467	-15.1787	2.87768e-17	5.16913e-16
ENSG00000103740	-4.6111	4.43989	-12.0668	2.87973e-17	5.16918e-16
ENSG00000224222	3.43299	-0.292972	12.0647	2.9063e-17	5.21265e-16
ENSG00000147676	5.01843	-0.618987	13.4142	2.90801e-17	5.21265e-16
ENSG00000240086	3.68343	0.901695	13.195	2.91547e-17	5.22237e-16
ENSG00000072201	2.62265	3.29258	14.3143	2.9194e-17	5.22574e-16
ENSG00000237686	2.70061	1.39141	11.9804	2.93563e-17	5.25113e-16
ENSG00000256721	3.28094	1.58255	14.2296	2.93912e-17	5.2537e-16
ENSG00000006116	4.31142	0.732472	14.9888	2.95051e-17	5.27039e-16
ENSG00000254081	-6.06102	-0.312569	-14.7799	2.9653e-17	5.29311e-16
ENSG00000163016	1.36371	3.92645	11.9765	2.97489e-17	5.30653e-16
ENSG00000281961	4.3524	-1.18929	14.8401	3.00988e-17	5.36521e-16
ENSG00000103647	-1.68641	6.40792	-15.9031	3.04384e-17	5.42197e-16
ENSG00000170091	3.01359	5.69611	15.4318	3.04673e-17	5.42334e-16
ENSG00000046653	-2.79932	6.62316	-16.292	3.08969e-17	5.496e-16
ENSG00000179241	-2.44819	4.70811	-11.9653	3.09257e-17	5.4973e-16
ENSG00000205927	-5.02303	3.38922	-14.6402	3.09984e-17	5.50641e-16
ENSG00000149582	1.68909	4.68353	16.3758	3.10908e-17	5.51899e-16
ENSG00000136881	3.59248	0.51577	11.9634	3.11268e-17	5.52156e-16
ENSG00000122863	-4.30658	5.00201	-11.9628	3.11925e-17	5.52939e-16
ENSG00000145934	4.25998	4.23675	15.2382	3.12795e-17	5.54096e-16
ENSG00000166262	-2.2731	2.28383	-14.2484	3.13667e-17	5.55258e-16
ENSG00000259771	-4.42593	-1.6143	-13.4006	3.15069e-17	5.57355e-16
ENSG00000176454	2.97325	5.74899	16.4001	3.15309e-17	5.57393e-16
ENSG00000254487	4.49336	-1.48675	13.6868	3.16161e-17	5.58515e-16
ENSG00000279693	3.55813	1.12411	16.0491	3.17036e-17	5.59674e-16
ENSG00000119906	-1.79199	7.85375	-16.1413	3.21487e-17	5.6714e-16
ENSG00000235397	-4.77789	-1.04678	-11.9538	3.21747e-17	5.67204e-16
ENSG00000268297	6.07746	-0.0226083	15.4962	3.22086e-17	5.67204e-16
ENSG00000136842	-1.78933	2.71024	-13.3604	3.22187e-17	5.67204e-16
ENSG00000223530	5.40211	-1.36145	13.3817	3.24083e-17	5.7015e-16
ENSG00000182054	-1.56192	4.8185	-13.7063	3.25122e-17	5.71585e-16
ENSG00000008118	4.83809	1.54452	14.6915	3.25377e-17	5.71641e-16
ENSG00000267521	4.32251	-0.994622	14.1113	3.26262e-17	5.72803e-16
ENSG00000156564	3.25421	3.80509	15.8382	3.28983e-17	5.77185e-16
ENSG00000234981	4.38862	-1.33168	13.7922	3.30625e-17	5.79629e-16
ENSG00000148411	-1.52229	5.76752	-11.9457	3.30829e-17	5.79629e-16
ENSG00000171604	-1.75396	5.71101	-15.057	3.34641e-17	5.85908e-16
ENSG00000201331	5.59465	4.4863	15.6286	3.3872e-17	5.92645e-16
ENSG00000188848	2.73969	2.59303	16.4858	3.3986e-17	5.94233e-16
ENSG00000039068	-5.70894	2.07923	-14.8159	3.41099e-17	5.95779e-16
ENSG00000231999	-2.25243	3.02643	-16.6485	3.41209e-17	5.95779e-16
ENSG00000189410	4.88226	1.68331	16.2276	3.41543e-17	5.95955e-16
ENSG00000237818	2.9835	1.91687	14.1324	3.4189e-17	5.96154e-16
ENSG00000202261	5.97945	1.48705	18.8246	3.4274e-17	5.97231e-16
ENSG00000260750	3.04396	1.23182	17.0816	3.53221e-17	6.15075e-16
ENSG00000274376	4.10118	1.86406	16.3814	3.56497e-17	6.20358e-16
ENSG00000107105	4.66655	3.71879	16.4847	3.60929e-17	6.27644e-16
ENSG00000152782	2.38699	2.83405	15.4659	3.62136e-17	6.29316e-16
ENSG00000275832	-2.91298	7.62299	-15.2349	3.6611e-17	6.35791e-16
ENSG00000250075	2.77943	1.25937	14.1922	3.69989e-17	6.42091e-16
ENSG00000200987	6.30902	2.61946	16.7159	3.7497e-17	6.50095e-16
ENSG00000132359	3.19073	5.18362	16.3525	3.75108e-17	6.50095e-16
ENSG00000101134	2.8011	2.3717	14.2004	3.79686e-17	6.57584e-16
ENSG00000166402	2.49167	6.12051	19.1873	3.80082e-17	6.57824e-16
ENSG00000005893	-2.55909	6.16471	-19.5098	3.81909e-17	6.60541e-16
ENSG00000224189	-5.01649	2.66187	-11.9797	3.87849e-17	6.70089e-16
ENSG00000100505	1.39101	7.96193	15.5834	3.87953e-17	6.70089e-16
ENSG00000223723	5.93865	-0.508085	17.8862	3.95058e-17	6.81902e-16
ENSG00000070886	6.6978	1.76566	14.8939	3.97406e-17	6.85492e-16
ENSG00000213938	-5.30024	0.56421	-14.0285	3.98632e-17	6.87144e-16
ENSG00000213366	-2.38127	4.24517	-15.6992	3.99774e-17	6.88649e-16
ENSG00000103550	-2.63526	6.89324	-15.4831	4.01624e-17	6.9137e-16
ENSG00000229473	-3.88141	0.369714	-11.9687	4.02871e-17	6.93052e-16
ENSG00000172794	4.45219	2.02008	18.1538	4.06232e-17	6.98365e-16
ENSG00000173227	4.0023	3.25815	17.3127	4.07034e-17	6.99273e-16
ENSG00000279419	-3.61989	2.73009	-15.8995	4.07602e-17	6.9978e-16
ENSG00000104231	1.30546	5.9145	16.3681	4.24594e-17	7.28464e-16
ENSG00000181722	-2.16295	7.33282	-18.9041	4.29297e-17	7.36041e-16
ENSG00000241462	2.91872	0.957808	11.8651	4.37257e-17	7.49187e-16
ENSG00000138316	-5.15344	2.87668	-16.2	4.3866e-17	7.51087e-16
ENSG00000108387	-2.40322	8.34506	-14.6707	4.4124e-17	7.55001e-16
ENSG00000106484	2.53608	4.64535	16.0005	4.42663e-17	7.5693e-16
ENSG00000134072	1.99116	3.68539	11.8595	4.45794e-17	7.61776e-16
ENSG00000213424	4.5559	-0.52714	14.7774	4.4783e-17	7.64436e-16
ENSG00000225376	-4.6807	0.560203	-13.6084	4.47948e-17	7.64436e-16
ENSG00000119782	3.24165	0.696787	11.8573	4.49224e-17	7.65918e-16
ENSG00000241756	3.30492	0.315632	15.5397	4.49414e-17	7.65918e-16
ENSG00000115271	-1.89383	4.36345	-14.5698	4.51168e-17	7.68229e-16
ENSG00000141524	-5.3253	5.3631	-11.9356	4.5137e-17	7.68229e-16
ENSG00000163590	1.90994	5.84116	15.4621	4.55606e-17	7.74684e-16
ENSG00000016602	-6.24414	1.7414	-15.3194	4.55767e-17	7.74684e-16
ENSG00000100625	2.94059	1.63184	13.3814	4.57841e-17	7.77692e-16
ENSG00000162104	1.69582	5.65297	16.2612	4.58832e-17	7.7886e-16
ENSG00000183542	-4.75969	-1.69524	-16.2629	4.60124e-17	7.80535e-16
ENSG00000243916	4.58341	-0.51726	13.5213	4.6318e-17	7.85198e-16
ENSG00000145911	5.12399	1.91171	15.5503	4.63635e-17	7.85451e-16
ENSG00000082458	1.51781	5.64403	14.6098	4.69409e-17	7.94707e-16
ENSG00000222095	4.52231	-0.858814	13.5789	4.6974e-17	7.94741e-16
ENSG00000101695	-3.33285	1.75004	-14.5784	4.75862e-17	8.04568e-16
ENSG00000179240	1.19441	4.76106	11.8395	4.77785e-17	8.07286e-16
ENSG00000201679	6.22844	2.61349	16.3353	4.80402e-17	8.11173e-16
ENSG00000158195	-1.94233	5.78293	-14.8273	4.83127e-17	8.15236e-16
ENSG00000276740	2.89119	2.18209	16.3543	4.87537e-17	8.22138e-16
ENSG00000160963	5.49582	0.438279	17.3441	4.93076e-17	8.30653e-16
ENSG00000259158	1.98304	3.57737	14.453	4.93236e-17	8.30653e-16
ENSG00000233058	2.19951	2.56047	15.5824	5.13804e-17	8.64723e-16
ENSG00000146122	-5.034	7.52235	-13.3575	5.14142e-17	8.64725e-16
ENSG00000183775	2.52732	4.44365	17.5741	5.14824e-17	8.65304e-16
ENSG00000232503	5.33948	-0.755566	14.5689	5.16791e-17	8.6804e-16
ENSG00000145555	-2.87758	5.76191	-13.9638	5.27031e-17	8.84658e-16
ENSG00000163040	3.71667	1.35206	17.9156	5.31038e-17	8.90802e-16
ENSG00000127220	2.65632	2.68631	14.2964	5.36028e-17	8.98584e-16
ENSG00000162300	-1.40879	4.25481	-16.3341	5.37449e-17	9.00376e-16
ENSG00000198964	-1.53566	6.42051	-14.8168	5.40465e-17	9.04306e-16
ENSG00000154642	-3.55737	4.09518	-14.4087	5.40501e-17	9.04306e-16
ENSG00000225889	-4.45895	1.90277	-11.7955	5.56529e-17	9.30515e-16
ENSG00000138646	-3.15892	1.74549	-11.792	5.63224e-17	9.41095e-16
ENSG00000156471	1.62835	4.89884	17.2447	5.71527e-17	9.54346e-16
ENSG00000235497	4.44096	-1.66439	15.3046	5.72544e-17	9.54937e-16
ENSG00000233885	-3.51913	2.32532	-13.8008	5.72627e-17	9.54937e-16
ENSG00000140575	-2.2796	8.15584	-13.702	5.76069e-17	9.60053e-16
ENSG00000148798	3.38108	4.62522	11.8511	5.76866e-17	9.60756e-16
ENSG00000151148	-0.901308	6.77362	-13.9419	5.77529e-17	9.61235e-16
ENSG00000201634	5.73482	0.00432243	17.1769	5.79778e-17	9.64351e-16
ENSG00000131323	1.15362	6.04729	14.6933	5.84106e-17	9.70921e-16
ENSG00000199968	4.99351	-1.88954	17.9364	5.88036e-17	9.76819e-16
ENSG00000267041	-1.87662	2.42771	-11.7794	5.88451e-17	9.76875e-16
ENSG00000164050	-3.56539	7.40733	-15.1166	5.88876e-17	9.76947e-16
ENSG00000141337	2.22464	3.71997	13.5598	5.92512e-17	9.82292e-16
ENSG00000129757	-4.0173	2.24695	-11.7773	5.92865e-17	9.82292e-16
ENSG00000281708	2.77219	3.10411	14.9722	5.96214e-17	9.87203e-16
ENSG00000253368	3.12371	1.7786	14.9597	5.99486e-17	9.91979e-16
ENSG00000273372	4.63247	0.202895	14.2967	6.09574e-17	1.00802e-15
ENSG00000092068	2.33509	4.04183	16.0881	6.14881e-17	1.01614e-15
ENSG00000119661	1.31251	3.92104	14.1266	6.16865e-17	1.01876e-15
ENSG00000176381	-4.62469	3.23731	-14.3555	6.21597e-17	1.02592e-15
ENSG00000231752	2.51945	2.34869	15.9453	6.22724e-17	1.02711e-15
ENSG00000182256	4.96231	1.9324	14.8565	6.26798e-17	1.03317e-15
ENSG00000126950	3.55701	2.2972	15.0301	6.39501e-17	1.05343e-15
ENSG00000169554	-4.44639	8.42509	-13.4831	6.4085e-17	1.05497e-15
ENSG00000164953	2.2409	3.97587	17.8082	6.41492e-17	1.05535e-15
ENSG00000242381	4.19918	-1.36143	13.3019	6.4503e-17	1.06049e-15
ENSG00000230725	4.88773	-1.0508	11.7504	6.50883e-17	1.06943e-15
ENSG00000058404	3.45138	5.84697	17.4608	6.53026e-17	1.07198e-15
ENSG00000250999	3.79328	-0.416972	11.7493	6.53451e-17	1.07198e-15
ENSG00000101977	2.32635	4.1484	20.9946	6.53691e-17	1.07198e-15
ENSG00000282692	4.31823	-2.15684	15.3588	6.57185e-17	1.07702e-15
ENSG00000110697	2.83468	4.91041	15.1396	6.58829e-17	1.07902e-15
ENSG00000100321	1.89447	6.84675	17.2063	6.63383e-17	1.08579e-15
ENSG00000163171	2.62966	2.35648	13.6357	6.66206e-17	1.08971e-15
ENSG00000204650	1.40631	6.3802	15.9323	6.79795e-17	1.11123e-15
ENSG00000201831	4.85245	2.10265	17.1608	6.83529e-17	1.11635e-15
ENSG00000218416	4.48296	-0.354633	12.7385	6.83797e-17	1.11635e-15
ENSG00000174137	-2.32524	3.04456	-15.01	6.85583e-17	1.11855e-15
ENSG00000202174	4.89689	-0.726657	14.1418	7.00042e-17	1.14141e-15
ENSG00000124356	-1.40626	6.12794	-14.0839	7.0413e-17	1.14735e-15
ENSG00000100473	4.44032	1.06852	13.6578	7.04729e-17	1.14759e-15
ENSG00000177479	-0.921268	7.87748	-11.795	7.18907e-17	1.16994e-15
ENSG00000186976	1.60408	4.42238	14.8386	7.21366e-17	1.17257e-15
ENSG00000199782	5.15335	-1.78811	14.1695	7.21443e-17	1.17257e-15
ENSG00000137726	2.29637	4.40495	13.2711	7.22727e-17	1.17392e-15
ENSG00000165300	2.32955	5.8784	16.033	7.25782e-17	1.17813e-15
ENSG00000196972	2.7141	3.05021	16.7511	7.31981e-17	1.1868e-15
ENSG00000124067	-4.26153	3.17459	-11.7932	7.3205e-17	1.1868e-15
ENSG00000005884	3.31756	4.62479	14.2248	7.36807e-17	1.19376e-15
ENSG00000261678	5.42922	3.05089	17.1832	7.40545e-17	1.19906e-15
ENSG00000133302	1.86537	4.98629	17.5845	7.42439e-17	1.20136e-15
ENSG00000185774	2.93823	5.40119	14.5053	7.49855e-17	1.2126e-15
ENSG00000125851	3.31743	3.40763	15.6891	7.64073e-17	1.23481e-15
ENSG00000174428	-1.96959	4.40155	-18.0169	7.68011e-17	1.24039e-15
ENSG00000186377	5.18601	1.68029	16.7895	7.71251e-17	1.24484e-15
ENSG00000182902	-3.53904	3.7419	-14.55	7.78286e-17	1.2554e-15
ENSG00000016391	-3.5059	3.39889	-15.3192	7.79382e-17	1.25563e-15
ENSG00000205978	2.77666	4.43648	13.6621	7.79404e-17	1.25563e-15
ENSG00000281692	-5.18725	1.10018	-14.8233	7.99269e-17	1.28682e-15
ENSG00000105483	-3.33729	4.64817	-11.6911	7.99995e-17	1.28718e-15
ENSG00000272631	2.16091	2.146	14.1999	8.00756e-17	1.28759e-15
ENSG00000258603	2.83208	1.84083	11.6902	8.02516e-17	1.28904e-15
ENSG00000070729	5.73031	1.57348	14.9913	8.02662e-17	1.28904e-15
ENSG00000137845	-1.69971	7.05544	-14.5406	8.04686e-17	1.29094e-15
ENSG00000186472	2.27489	8.53078	19.5287	8.04851e-17	1.29094e-15
ENSG00000232852	4.94317	-1.18588	14.0607	8.14512e-17	1.30562e-15
ENSG00000205116	-5.17386	1.70934	-11.6819	8.26175e-17	1.32348e-15
ENSG00000160190	1.95308	4.37614	14.6201	8.27147e-17	1.32421e-15
ENSG00000273329	-1.60291	5.03156	-17.4178	8.31475e-17	1.33031e-15
ENSG00000258783	5.62918	0.512266	13.8478	8.36091e-17	1.33686e-15
ENSG00000010282	-4.30182	6.51602	-11.7529	8.37242e-17	1.33786e-15
ENSG00000201943	5.89057	3.0634	16.3563	8.38511e-17	1.33906e-15
ENSG00000171812	-3.95147	-0.167731	-11.7509	8.41263e-17	1.34261e-15
ENSG00000196118	2.73757	2.42174	19.1657	8.49407e-17	1.35477e-15
ENSG00000134533	4.07728	1.70849	17.5377	8.50237e-17	1.35525e-15
ENSG00000139668	-1.43052	6.78745	-17.2292	8.54562e-17	1.36129e-15
ENSG00000261624	2.8838	1.98127	13.9023	8.58297e-17	1.36557e-15
ENSG00000253741	2.59016	2.2457	15.4914	8.58315e-17	1.36557e-15
ENSG00000155016	1.60506	4.15549	14.6871	8.68456e-17	1.38085e-15
ENSG00000114115	-3.03043	1.98656	-11.6664	8.72012e-17	1.38564e-15
ENSG00000177873	-1.39572	3.55344	-12.952	8.75375e-17	1.39013e-15
ENSG00000197375	1.35256	5.23973	11.6638	8.8011e-17	1.39678e-15
ENSG00000103855	2.25477	4.74569	14.1401	8.82742e-17	1.40009e-15
ENSG00000156959	2.52511	4.49832	13.8989	8.84569e-17	1.40212e-15
ENSG00000261710	-5.64151	-0.117139	-13.8372	8.86278e-17	1.40396e-15
ENSG00000111344	-3.22869	4.77738	-15.2265	9.05279e-17	1.43317e-15
ENSG00000116525	-1.76492	4.76345	-15.4102	9.08921e-17	1.43805e-15
ENSG00000071967	-3.73486	2.8308	-11.7289	9.14391e-17	1.4458e-15
ENSG00000123360	2.92067	3.88665	15.9597	9.14949e-17	1.4458e-15
ENSG00000178773	5.43652	2.92834	17.2917	9.23948e-17	1.45912e-15
ENSG00000172403	2.37436	3.89788	14.0567	9.28476e-17	1.46537e-15
ENSG00000146054	4.1535	2.12987	16.1661	9.39425e-17	1.48173e-15
ENSG00000167619	2.619	4.57483	15.7996	9.42986e-17	1.48644e-15
ENSG00000255910	4.65845	0.675362	14.7177	9.43598e-17	1.48649e-15
ENSG00000285476	6.10239	-0.044129	16.1841	9.46093e-17	1.4895e-15
ENSG00000163288	2.44543	4.35761	13.8533	9.50289e-17	1.49519e-15
ENSG00000242268	4.11129	0.206267	13.2355	9.5664e-17	1.50426e-15
ENSG00000224257	4.55561	-1.67516	13.397	9.66488e-17	1.51881e-15
ENSG00000279537	4.75778	-0.532009	14.6482	9.6906e-17	1.52192e-15
ENSG00000225506	3.54797	-0.251455	11.6356	9.70828e-17	1.52376e-15
ENSG00000184515	2.5856	2.64506	13.7483	9.80152e-17	1.53745e-15
ENSG00000107362	-1.48296	4.33772	-13.5857	9.83839e-17	1.54229e-15
ENSG00000278873	2.91616	2.99184	15.8288	9.85294e-17	1.54363e-15
ENSG00000255581	3.2601	-0.227829	11.629	9.9369e-17	1.55583e-15
ENSG00000233334	-4.97884	-0.336882	-14.1872	9.99418e-17	1.56384e-15
ENSG00000158079	-1.79185	6.39974	-14.5935	1.00289e-16	1.56832e-15
ENSG00000124479	-3.78887	-0.218896	-11.6935	1.02457e-16	1.60124e-15
ENSG00000118402	2.86919	3.14578	20.093	1.02785e-16	1.60539e-15
ENSG00000171246	4.88819	1.36946	15.4247	1.04403e-16	1.62966e-15
ENSG00000148339	1.78933	5.28578	15.5291	1.04921e-16	1.63594e-15
ENSG00000159388	-2.72756	4.25193	-11.6893	1.04933e-16	1.63594e-15
ENSG00000168348	4.95066	-0.682843	13.8021	1.06074e-16	1.65273e-15
ENSG00000165912	-4.57206	3.2064	-11.6828	1.07253e-16	1.67008e-15
ENSG00000112561	-4.14881	4.87207	-14.1664	1.07541e-16	1.67322e-15
ENSG00000196839	-5.54858	1.44542	-11.6821	1.07585e-16	1.67322e-15
ENSG00000200564	6.18816	2.25314	15.8252	1.07894e-16	1.677e-15
ENSG00000131149	2.07858	5.62108	14.7581	1.08458e-16	1.68474e-15
ENSG00000072954	2.13308	3.56356	11.6025	1.08984e-16	1.69134e-15
ENSG00000022355	4.11432	3.91904	18.2898	1.09015e-16	1.69134e-15
ENSG00000197852	-2.63196	2.68552	-14.3379	1.0983e-16	1.70297e-15
ENSG00000196557	5.01571	2.46146	15.374	1.10107e-16	1.70622e-15
ENSG00000284600	3.91208	-0.976904	12.9575	1.10509e-16	1.71141e-15
ENSG00000254241	-5.85825	-0.228904	-14.4787	1.11305e-16	1.72271e-15
ENSG00000204446	-2.47785	2.65313	-13.5961	1.11688e-16	1.72759e-15
ENSG00000253154	-4.62817	-0.496755	-14.3316	1.12491e-16	1.73896e-15
ENSG00000124313	2.23328	5.23894	15.7062	1.13436e-16	1.75252e-15
ENSG00000260588	3.98803	1.47383	15.7181	1.14249e-16	1.76401e-15
ENSG00000173209	-1.41321	7.59982	-18.5842	1.14681e-16	1.76961e-15
ENSG00000108395	1.40075	6.81365	15.936	1.15138e-16	1.77499e-15
ENSG00000161920	-1.02384	2.97913	-11.5867	1.15168e-16	1.77499e-15
ENSG00000171033	2.17689	3.89973	15.3572	1.16468e-16	1.79394e-15
ENSG00000053108	3.3638	3.09161	15.5126	1.17444e-16	1.80695e-15
ENSG00000254491	-5.87016	0.358785	-11.5811	1.17453e-16	1.80695e-15
ENSG00000230317	4.29965	-1.32995	12.9148	1.17879e-16	1.81241e-15
ENSG00000248859	3.79528	-1.54767	11.579	1.18338e-16	1.81831e-15
ENSG00000167614	-4.20937	5.5595	-11.5788	1.18405e-16	1.81831e-15
ENSG00000204851	2.21645	5.6379	15.6648	1.19731e-16	1.83758e-15
ENSG00000222552	3.94152	-1.86485	13.7326	1.19871e-16	1.83861e-15
ENSG00000075945	1.99406	6.00072	16.3723	1.21626e-16	1.86442e-15
ENSG00000117069	5.07809	1.21795	16.2278	1.24625e-16	1.90925e-15
ENSG00000112118	-1.2805	4.11823	-13.5993	1.24894e-16	1.91224e-15
ENSG00000113100	5.62075	0.452144	16.2729	1.25841e-16	1.92491e-15
ENSG00000111664	3.10367	3.01669	15.586	1.25872e-16	1.92491e-15
ENSG00000239922	-3.90978	2.21594	-11.5601	1.2644e-16	1.93243e-15
ENSG00000003096	2.43419	3.1128	17.5722	1.26774e-16	1.93639e-15
ENSG00000238194	-4.1883	-0.943241	-14.1605	1.26996e-16	1.93862e-15
ENSG00000140265	-0.94552	5.56108	-12.7066	1.27614e-16	1.94689e-15
ENSG00000231515	4.6229	-0.301628	14.6844	1.28051e-16	1.9524e-15
ENSG00000205037	5.14039	-0.912909	14.7475	1.28697e-16	1.96108e-15
ENSG00000127955	-1.77796	6.56772	-19.4967	1.28889e-16	1.96284e-15
ENSG00000184007	-1.40329	6.29531	-11.6254	1.29481e-16	1.97068e-15
ENSG00000272419	1.8138	3.57983	11.5509	1.30581e-16	1.98624e-15
ENSG00000224940	5.34969	1.2368	14.747	1.3269e-16	2.01712e-15
ENSG00000201300	5.63005	-0.319949	17.3891	1.33472e-16	2.02781e-15
ENSG00000121933	-5.3064	1.40204	-14.8325	1.34628e-16	2.04416e-15
ENSG00000188493	-1.68229	2.06913	-11.6164	1.34859e-16	2.04645e-15
ENSG00000163602	-1.77493	5.07966	-11.5409	1.35238e-16	2.05098e-15
ENSG00000163082	3.53224	2.62036	16.3292	1.36489e-16	2.06873e-15
ENSG00000174483	1.30057	4.00694	13.3118	1.36738e-16	2.07128e-15
ENSG00000112294	2.17782	4.07453	19.1227	1.37954e-16	2.08847e-15
ENSG00000251623	4.89049	-0.43004	16.032	1.39128e-16	2.105e-15
ENSG00000205810	-4.33394	-1.29725	-16.5034	1.40389e-16	2.12283e-15
ENSG00000164010	-2.00808	3.54984	-15.4572	1.40582e-16	2.12449e-15
ENSG00000234773	1.04041	3.51468	11.5969	1.41161e-16	2.13198e-15
ENSG00000135631	2.65775	4.07467	18.1982	1.43452e-16	2.1653e-15
ENSG00000116141	1.68136	5.8707	21.1908	1.43537e-16	2.16531e-15
ENSG00000109046	-1.35943	9.56588	-13.6101	1.44108e-16	2.17265e-15
ENSG00000148158	-1.14962	6.80189	-13.3668	1.44226e-16	2.17315e-15
ENSG00000011677	2.56683	2.71656	13.2854	1.44602e-16	2.17752e-15
ENSG00000115896	-1.95542	7.37719	-13.706	1.45234e-16	2.18576e-15
ENSG00000150051	3.76318	1.01164	13.1172	1.45328e-16	2.1859e-15
ENSG00000272941	-4.1831	0.223975	-11.5193	1.45825e-16	2.19208e-15
ENSG00000147113	-4.32538	2.41866	-11.5165	1.47275e-16	2.21258e-15
ENSG00000272182	-3.4879	0.93789	-13.1814	1.4844e-16	2.22878e-15
ENSG00000186056	-3.65769	2.39272	-14.1824	1.50345e-16	2.25606e-15
ENSG00000128285	3.93671	-0.0734124	11.5834	1.50929e-16	2.26349e-15
ENSG00000259200	3.2146	-2.20831	11.5077	1.51898e-16	2.27669e-15
ENSG00000132026	3.14956	-0.747698	11.5071	1.52202e-16	2.27992e-15
ENSG00000279819	-3.4451	2.82147	-14.5971	1.52543e-16	2.28368e-15
ENSG00000179148	5.20474	0.171718	13.2923	1.53714e-16	2.29987e-15
ENSG00000182534	1.36247	4.57855	16.0982	1.54481e-16	2.31001e-15
ENSG00000237515	1.70005	4.85178	11.5011	1.55445e-16	2.32307e-15
ENSG00000225465	2.26845	3.41911	13.9642	1.55937e-16	2.32905e-15
ENSG00000059915	3.80018	4.32231	17.9101	1.56148e-16	2.33085e-15
ENSG00000261490	-1.91407	1.92611	-11.4958	1.58397e-16	2.36303e-15
ENSG00000215196	2.37663	2.94212	11.5576	1.58534e-16	2.3637e-15
ENSG00000100697	-1.69114	8.49336	-14.7258	1.58799e-16	2.36628e-15
ENSG00000087460	1.47703	7.85034	13.8209	1.60413e-16	2.38894e-15
ENSG00000267568	4.4309	-1.14693	13.3926	1.60642e-16	2.39095e-15
ENSG00000249553	-3.22016	3.41857	-13.9465	1.62279e-16	2.41216e-15
ENSG00000132975	3.5487	2.08683	14.3086	1.62332e-16	2.41216e-15
ENSG00000253598	2.64449	1.33385	13.8281	1.62349e-16	2.41216e-15
ENSG00000066322	-2.46042	5.11202	-15.0274	1.6313e-16	2.42111e-15
ENSG00000079102	1.69652	5.82186	11.5536	1.6314e-16	2.42111e-15
ENSG00000212384	3.61317	0.867232	15.3952	1.63258e-16	2.42145e-15
ENSG00000092758	-4.87158	5.37769	-13.6445	1.65538e-16	2.45385e-15
ENSG00000237166	-5.65031	0.861687	-15.631	1.65802e-16	2.45634e-15
ENSG00000225867	-4.73211	-1.33224	-11.5547	1.66254e-16	2.46161e-15
ENSG00000200421	3.69421	-2.12237	13.936	1.67994e-16	2.48594e-15
ENSG00000157985	-1.38136	8.15064	-11.5458	1.70086e-16	2.51545e-15
ENSG00000143147	2.65835	3.91488	19.0871	1.70289e-16	2.517e-15
ENSG00000126214	-1.22536	6.96779	-15.845	1.71361e-16	2.53138e-15
ENSG00000240405	-4.31252	2.38316	-11.4705	1.73087e-16	2.55541e-15
ENSG00000143590	4.24682	-0.183846	15.6638	1.76627e-16	2.60617e-15
ENSG00000109381	-1.53836	6.4265	-13.5984	1.76759e-16	2.60661e-15
ENSG00000107317	-4.51728	5.95495	-13.5114	1.77578e-16	2.61718e-15
ENSG00000131019	4.17398	0.251776	13.2528	1.77903e-16	2.62047e-15
ENSG00000145526	3.26289	4.67002	13.7389	1.80046e-16	2.6505e-15
ENSG00000166394	-3.92063	2.80192	-13.9451	1.81533e-16	2.67085e-15
ENSG00000184524	2.0575	4.5137	14.9797	1.82076e-16	2.6773e-15
ENSG00000172725	-1.62658	4.40187	-13.314	1.82752e-16	2.68571e-15
ENSG00000152527	-2.70849	6.3498	-13.3538	1.83807e-16	2.69966e-15
ENSG00000204217	1.52339	6.1614	17.8881	1.84307e-16	2.70546e-15
ENSG00000162426	1.68125	3.18396	13.8153	1.8576e-16	2.72522e-15
ENSG00000100526	3.54022	-0.565984	12.8868	1.85979e-16	2.72687e-15
ENSG00000118690	1.35431	5.25133	15.5213	1.86965e-16	2.73976e-15
ENSG00000116106	4.66645	3.89792	13.3714	1.88048e-16	2.75406e-15
ENSG00000204352	2.82733	1.20065	13.1875	1.89035e-16	2.76693e-15
ENSG00000197748	2.3451	4.35001	15.6817	1.89715e-16	2.77529e-15
ENSG00000177694	-2.3131	3.60339	-17.0249	1.90152e-16	2.78011e-15
ENSG00000255547	4.77488	-1.9642	13.1714	1.90932e-16	2.78992e-15
ENSG00000244627	-1.72563	4.55699	-15.367	1.9191e-16	2.80261e-15
ENSG00000187801	1.62903	3.94245	13.8055	1.94504e-16	2.83887e-15
ENSG00000008056	3.24254	3.37414	13.7221	1.95321e-16	2.84918e-15
ENSG00000077684	0.796845	5.91516	11.5045	1.97565e-16	2.87879e-15
ENSG00000255857	-1.53154	3.09372	-14.1941	1.97576e-16	2.87879e-15
ENSG00000158815	3.72858	3.30562	20.3253	2.01392e-16	2.93273e-15
ENSG00000166006	5.22746	2.41664	15.0109	2.07708e-16	3.02298e-15
ENSG00000227879	3.94805	0.910167	14.2464	2.08098e-16	3.02694e-15
ENSG00000103723	2.68309	7.10914	18.8895	2.08731e-16	3.03441e-15
ENSG00000159784	-1.84692	6.22919	-11.4166	2.09198e-16	3.03948e-15
ENSG00000108352	2.81311	5.51899	17.6249	2.09795e-16	3.04643e-15
ENSG00000207762	4.12467	-1.83171	11.4845	2.1259e-16	3.08526e-15
ENSG00000215966	4.05226	-2.41234	13.0479	2.12944e-16	3.08865e-15
ENSG00000260412	5.52934	1.38682	14.4664	2.13349e-16	3.09277e-15
ENSG00000269982	-3.40994	1.45331	-11.482	2.14779e-16	3.11175e-15
ENSG00000255207	4.38053	-0.934356	13.2239	2.15442e-16	3.11958e-15
ENSG00000242618	-4.00309	0.106484	-12.8664	2.1605e-16	3.12663e-15
ENSG00000162444	-4.9517	0.320602	-13.7567	2.16538e-16	3.13191e-15
ENSG00000144152	2.3337	2.58907	14.0316	2.18325e-16	3.15597e-15
ENSG00000205562	4.81632	0.100199	14.2515	2.19091e-16	3.16527e-15
ENSG00000205930	-1.90516	3.02576	-14.4677	2.19344e-16	3.16713e-15
ENSG00000125844	-2.52573	6.82854	-14.9207	2.21403e-16	3.19507e-15
ENSG00000203867	4.09922	2.21429	13.9769	2.28175e-16	3.29094e-15
ENSG00000158315	-4.42209	3.20524	-13.8195	2.29443e-16	3.30737e-15
ENSG00000053524	1.29159	7.01038	11.3877	2.31573e-16	3.33618e-15
ENSG00000113810	-2.74117	3.55875	-13.7962	2.32024e-16	3.34081e-15
ENSG00000106268	-3.26359	0.0116705	-11.3856	2.33303e-16	3.35734e-15
ENSG00000122566	-1.16027	10.0393	-15.9128	2.35061e-16	3.38073e-15
ENSG00000163820	-3.66479	5.19503	-13.6615	2.37332e-16	3.40739e-15
ENSG00000257935	5.38301	-0.944365	14.6661	2.37336e-16	3.40739e-15
ENSG00000212719	1.70405	5.36025	18.1992	2.37386e-16	3.40739e-15
ENSG00000162869	-1.57833	7.14203	-12.9661	2.37446e-16	3.40739e-15
ENSG00000164236	4.62688	2.33754	13.3801	2.38093e-16	3.41476e-15
ENSG00000166473	-3.17565	4.12698	-13.0767	2.40772e-16	3.45125e-15
ENSG00000196150	1.20035	5.37515	11.4379	2.42466e-16	3.47358e-15
ENSG00000176720	-2.78288	5.30031	-16.8494	2.44877e-16	3.50617e-15
ENSG00000266844	-3.40551	2.36056	-14.0072	2.45739e-16	3.51654e-15
ENSG00000185986	1.42228	5.92258	14.0636	2.48992e-16	3.5611e-15
ENSG00000013523	-1.00936	6.12856	-13.8628	2.49727e-16	3.56961e-15
ENSG00000183098	2.85631	4.17999	14.0293	2.50142e-16	3.57356e-15
ENSG00000285712	-4.1272	0.162146	-13.1952	2.51075e-16	3.58488e-15
ENSG00000263278	6.22605	0.762844	14.2036	2.53083e-16	3.61154e-15
ENSG00000064270	-3.51217	3.45906	-13.5136	2.54192e-16	3.62535e-15
ENSG00000176749	1.86798	4.33535	14.7114	2.55132e-16	3.63674e-15
ENSG00000285051	-4.50958	2.53078	-13.91	2.59825e-16	3.70157e-15
ENSG00000133256	-2.70412	7.06953	-17.312	2.61102e-16	3.71769e-15
ENSG00000099256	-2.10945	3.83733	-14.6199	2.64741e-16	3.76742e-15
ENSG00000159433	-1.71502	8.27728	-14.67	2.6522e-16	3.77213e-15
ENSG00000226479	-1.3511	4.23229	-14.4943	2.66383e-16	3.78658e-15
ENSG00000144395	-2.35425	3.54848	-13.5125	2.6668e-16	3.78869e-15
ENSG00000271913	2.36031	2.23922	13.2645	2.6697e-16	3.7907e-15
ENSG00000105643	-3.61541	4.88115	-14.2951	2.6908e-16	3.81855e-15
ENSG00000235571	5.40179	-0.284267	14.6759	2.69405e-16	3.82104e-15
ENSG00000163884	-2.61882	4.6957	-18.9538	2.70465e-16	3.83395e-15
ENSG00000160439	2.17133	5.26343	16.3109	2.75194e-16	3.89884e-15
ENSG00000261959	-4.23636	-1.34715	-11.3372	2.76705e-16	3.91808e-15
ENSG00000246731	-5.11338	2.13104	-11.3366	2.77265e-16	3.92261e-15
ENSG00000243319	2.44591	4.9822	16.7739	2.77399e-16	3.92261e-15
ENSG00000025293	-0.825067	6.00516	-11.3363	2.77637e-16	3.92261e-15
ENSG00000279970	-4.24422	2.46089	-11.3363	2.77638e-16	3.92261e-15
ENSG00000076382	1.94075	4.99769	15.9941	2.79911e-16	3.95254e-15
ENSG00000084234	1.5724	7.59129	16.2457	2.80775e-16	3.96256e-15
ENSG00000139915	1.47038	6.67364	11.3315	2.82312e-16	3.98205e-15
ENSG00000137817	-0.952146	6.78169	-13.9436	2.82691e-16	3.98521e-15
ENSG00000256287	5.11152	-1.25702	14.0933	2.84367e-16	4.00663e-15
ENSG00000156804	-2.17218	5.89737	-11.3971	2.86445e-16	4.03369e-15
ENSG00000185760	3.89479	2.11017	18.7797	2.86876e-16	4.03754e-15
ENSG00000176887	2.42905	3.76341	14.4749	2.90626e-16	4.08808e-15
ENSG00000262691	2.65541	3.57705	13.4813	2.91141e-16	4.0925e-15
ENSG00000184916	3.03481	3.95539	15.0081	2.9126e-16	4.0925e-15
ENSG00000234502	3.93496	-0.165883	12.9197	2.93437e-16	4.12083e-15
ENSG00000278535	2.461	4.37603	16.0688	2.94589e-16	4.13474e-15
ENSG00000265110	-4.30187	-1.11366	-11.318	2.96081e-16	4.1534e-15
ENSG00000104450	2.35823	3.67307	14.986	2.98985e-16	4.19184e-15
ENSG00000111674	1.54329	7.38197	15.2434	3.01592e-16	4.22608e-15
ENSG00000124786	-1.86928	4.36519	-13.6404	3.05751e-16	4.28202e-15
ENSG00000117477	1.69314	3.55586	15.5358	3.06121e-16	4.28486e-15
ENSG00000163032	3.38042	4.51658	14.9045	3.06705e-16	4.29068e-15
ENSG00000250159	-1.39095	4.19896	-13.9213	3.07277e-16	4.29634e-15
ENSG00000004399	-4.15991	5.62712	-11.3067	3.08224e-16	4.30688e-15
ENSG00000260418	-2.23938	1.88962	-14.1963	3.08367e-16	4.30688e-15
ENSG00000114805	3.45032	3.69299	15.6128	3.12608e-16	4.36373e-15
ENSG00000166925	-2.61906	4.87033	-14.7558	3.13146e-16	4.36887e-15
ENSG00000167642	1.98379	3.19547	13.6191	3.15914e-16	4.40508e-15
ENSG00000200593	5.81968	3.64929	15.9929	3.16745e-16	4.41427e-15
ENSG00000175130	-3.13128	5.79429	-11.2981	3.1773e-16	4.42558e-15
ENSG00000141750	5.23785	1.36805	18.0254	3.20081e-16	4.45591e-15
ENSG00000164086	-1.88889	4.94613	-18.5309	3.21594e-16	4.47454e-15
ENSG00000213190	2.13097	4.01571	16.7122	3.23884e-16	4.50396e-15
ENSG00000064687	3.13536	5.34649	19.7658	3.24724e-16	4.51146e-15
ENSG00000156219	-4.72026	-0.342216	-11.363	3.24776e-16	4.51146e-15
ENSG00000128203	3.31437	1.75132	14.6304	3.2668e-16	4.53545e-15
ENSG00000004864	-2.04706	5.77065	-13.4742	3.27499e-16	4.54436e-15
ENSG00000228878	-2.07775	3.24606	-15.0738	3.31348e-16	4.59528e-15
ENSG00000268170	-4.37765	1.48255	-11.3558	3.33e-16	4.61569e-15
ENSG00000154856	-3.49593	3.44172	-12.8162	3.41257e-16	4.72758e-15
ENSG00000274118	4.70783	-0.466987	13.1388	3.41651e-16	4.73048e-15
ENSG00000151164	-3.13451	-0.0163165	-11.2769	3.42343e-16	4.7375e-15
ENSG00000055118	2.90263	4.72019	16.155	3.42801e-16	4.74128e-15
ENSG00000251442	-4.33572	0.618181	-14.219	3.44169e-16	4.75763e-15
ENSG00000035687	-1.24996	6.00868	-13.7702	3.46026e-16	4.78072e-15
ENSG00000257093	-1.38385	7.07175	-16.0668	3.46666e-16	4.78472e-15
ENSG00000280304	4.43809	-0.204761	12.3726	3.46689e-16	4.78472e-15
ENSG00000101868	-1.21697	5.40575	-14.2602	3.50303e-16	4.82957e-15
ENSG00000101842	4.10781	-1.35604	13.1439	3.50316e-16	4.82957e-15
ENSG00000167889	4.55707	3.21418	19.0993	3.51753e-16	4.84678e-15
ENSG00000184451	3.09609	1.26331	13.28	3.52958e-16	4.86076e-15
ENSG00000109158	4.6756	2.61374	14.2895	3.53404e-16	4.86429e-15
ENSG00000094804	2.47004	1.63451	14.0265	3.54779e-16	4.88059e-15
ENSG00000182389	2.14355	6.513	13.9246	3.61417e-16	4.96924e-15
ENSG00000224557	5.73586	-0.110359	14.7121	3.65775e-16	5.02646e-15
ENSG00000160781	-3.26381	4.76146	-13.0843	3.70923e-16	5.09448e-15
ENSG00000159086	-1.16038	7.99051	-15.0244	3.7198e-16	5.10626e-15
ENSG00000241990	-2.31555	2.40435	-11.3232	3.73038e-16	5.11804e-15
ENSG00000139438	-2.09601	5.70034	-17.0883	3.76894e-16	5.1666e-15
ENSG00000197971	-4.98091	10.2559	-13.1146	3.76982e-16	5.1666e-15
ENSG00000172260	1.6105	5.32029	16.7772	3.78015e-16	5.178e-15
ENSG00000235349	3.17061	-0.699102	11.2485	3.78528e-16	5.18225e-15
ENSG00000261273	4.28596	-1.35787	14.7278	3.80076e-16	5.20066e-15
ENSG00000175764	-1.98561	6.23592	-14.6406	3.80528e-16	5.20406e-15
ENSG00000164402	-2.35345	8.58987	-14.1397	3.80979e-16	5.20745e-15
ENSG00000147536	-3.08476	1.32932	-12.6047	3.81413e-16	5.21061e-15
ENSG00000143367	1.63722	3.15724	13.3538	3.83838e-16	5.24095e-15
ENSG00000285218	-4.82454	-1.49494	-13.8096	3.84931e-16	5.25306e-15
ENSG00000164620	3.37196	4.38013	15.2624	3.91527e-16	5.34023e-15
ENSG00000115687	1.9141	4.98143	14.8705	3.94936e-16	5.38386e-15
ENSG00000158156	-3.71994	0.921113	-11.235	3.97079e-16	5.4102e-15
ENSG00000236114	2.60021	2.55904	16.3555	3.97579e-16	5.41414e-15
ENSG00000283765	-4.19072	-1.58359	-13.6257	3.9809e-16	5.41821e-15
ENSG00000198915	2.90884	3.34238	13.7337	3.99136e-16	5.42957e-15
ENSG00000253372	-2.49124	3.29763	-13.6662	3.99377e-16	5.42997e-15
ENSG00000184117	1.32231	4.42958	14.4479	4.04101e-16	5.49127e-15
ENSG00000100100	-1.28092	5.43223	-13.4487	4.05972e-16	5.51377e-15
ENSG00000133056	-1.74627	7.42809	-17.0461	4.08924e-16	5.55093e-15
ENSG00000187514	-2.44637	6.99208	-13.2014	4.09762e-16	5.55753e-15
ENSG00000180884	1.2676	3.1862	12.3498	4.09845e-16	5.55753e-15
ENSG00000107554	2.1461	5.41557	13.7481	4.1044e-16	5.56266e-15
ENSG00000166411	1.60738	5.65186	18.7129	4.11248e-16	5.57066e-15
ENSG00000162873	4.48616	2.43855	15.9443	4.11639e-16	5.573e-15
ENSG00000235296	5.68258	0.589783	15.6524	4.11935e-16	5.57407e-15
ENSG00000184588	-1.79326	7.60484	-14.3195	4.15969e-16	5.62569e-15
ENSG00000186193	-5.16011	1.49344	-11.2205	4.18078e-16	5.65122e-15
ENSG00000261292	4.57635	-0.27024	13.5826	4.22608e-16	5.70725e-15
ENSG00000055950	-1.24485	3.74902	-11.2174	4.22668e-16	5.70725e-15
ENSG00000237478	4.06585	0.486605	13.8504	4.29068e-16	5.79061e-15
ENSG00000164604	2.85878	2.55604	12.3387	4.36498e-16	5.88778e-15
ENSG00000154237	-2.61301	4.15102	-15.37	4.38406e-16	5.9104e-15
ENSG00000173988	-4.10595	3.11144	-13.3659	4.42827e-16	5.96687e-15
ENSG00000128805	-1.93979	7.02364	-16.1561	4.47922e-16	6.03234e-15
ENSG00000051128	-4.43621	1.96523	-11.2006	4.48516e-16	6.03718e-15
ENSG00000180891	-2.25319	6.08228	-15.1828	4.51869e-16	6.07912e-15
ENSG00000198168	-2.26359	5.27539	-13.7266	4.54327e-16	6.10897e-15
ENSG00000112531	-3.76799	9.39289	-13.7399	4.56957e-16	6.14111e-15
ENSG00000144460	5.89738	4.09208	13.7853	4.59914e-16	6.17761e-15
ENSG00000205531	-0.774496	7.7903	-11.1906	4.64761e-16	6.23944e-15
ENSG00000157796	1.66095	6.04199	18.2917	4.65742e-16	6.24934e-15
ENSG00000172554	4.83126	0.794462	14.1205	4.69415e-16	6.29532e-15
ENSG00000173801	-2.41727	3.82897	-14.1852	4.69904e-16	6.29858e-15
ENSG00000206028	3.78483	2.17088	13.5934	4.71713e-16	6.31952e-15
ENSG00000109436	2.05312	5.07964	12.8804	4.72164e-16	6.32226e-15
ENSG00000264468	4.11239	-2.36287	12.9364	4.74449e-16	6.34523e-15
ENSG00000250326	-1.82396	2.64681	-13.4489	4.74563e-16	6.34523e-15
ENSG00000159409	4.01195	4.23008	16.6107	4.74622e-16	6.34523e-15
ENSG00000152270	1.96536	4.8205	11.2354	4.7575e-16	6.35698e-15
ENSG00000259048	-3.38634	2.58823	-13.5909	4.78054e-16	6.38444e-15
ENSG00000196391	1.18959	4.72548	13.9796	4.78433e-16	6.38617e-15
ENSG00000179455	-3.54692	4.04563	-11.2465	4.81517e-16	6.42398e-15
ENSG00000159363	1.81071	6.3484	16.994	4.81895e-16	6.42568e-15
ENSG00000111218	4.82191	2.0411	13.5477	4.83999e-16	6.45038e-15
ENSG00000183833	2.20689	2.82581	13.6884	4.87024e-16	6.48732e-15
ENSG00000163001	1.54483	5.82921	18.7054	4.95476e-16	6.59647e-15
ENSG00000089053	-1.37866	8.20256	-13.7311	4.97948e-16	6.62595e-15
ENSG00000175766	5.25316	-0.244726	13.3679	5.07854e-16	6.75425e-15
ENSG00000236289	-4.45766	0.0834794	-12.753	5.09282e-16	6.76973e-15
ENSG00000144908	-3.96672	3.28609	-14.2606	5.11432e-16	6.79478e-15
ENSG00000175224	-1.16606	6.09556	-14.5923	5.12142e-16	6.80068e-15
ENSG00000260903	5.67096	1.03401	16.2033	5.27483e-16	7.00077e-15
ENSG00000262668	4.74344	-1.59154	14.1922	5.30874e-16	7.04212e-15
ENSG00000109956	-1.92899	7.77536	-11.1528	5.31426e-16	7.0458e-15
ENSG00000095739	-3.65679	1.11195	-11.2153	5.4336e-16	7.20029e-15
ENSG00000143858	3.90523	3.8981	15.4036	5.49351e-16	7.27508e-15
ENSG00000154027	-2.06754	6.65022	-11.1434	5.49572e-16	7.27508e-15
ENSG00000113140	-3.1084	4.73324	-11.2078	5.58211e-16	7.38563e-15
ENSG00000182749	1.50727	3.32615	13.1377	5.68012e-16	7.50905e-15
ENSG00000136425	2.59231	1.46006	11.134	5.68125e-16	7.50905e-15
ENSG00000175229	2.7559	1.18688	12.8794	5.6894e-16	7.51593e-15
ENSG00000253521	3.63675	-1.28639	12.3295	5.72267e-16	7.55598e-15
ENSG00000233061	-1.97456	4.94922	-13.124	5.74358e-16	7.5797e-15
ENSG00000178917	1.34448	4.53413	13.2515	5.77274e-16	7.61424e-15
ENSG00000140284	4.89856	-0.772016	13.5385	5.79218e-16	7.63595e-15
ENSG00000107902	-1.55277	5.54422	-13.6324	5.80468e-16	7.6485e-15
ENSG00000285230	-1.69622	3.08452	-13.3025	5.82139e-16	7.66657e-15
ENSG00000102468	5.26328	1.56452	14.7717	5.83271e-16	7.67754e-15
ENSG00000242173	2.77319	4.37829	15.5941	5.84185e-16	7.68561e-15
ENSG00000120253	-1.74267	4.04757	-14.4224	5.86803e-16	7.71609e-15
ENSG00000119943	-2.13921	4.19395	-14.6485	5.89587e-16	7.74873e-15
ENSG00000172318	3.40978	1.87852	13.9987	5.90555e-16	7.75747e-15
ENSG00000118246	1.51755	5.88808	15.11	5.934e-16	7.79085e-15
ENSG00000203485	-3.66584	7.0826	-13.4353	6.00009e-16	7.87358e-15
ENSG00000168758	-1.98379	6.05263	-17.1087	6.04531e-16	7.92886e-15
ENSG00000204175	5.92473	1.22718	14.4582	6.08857e-16	7.98151e-15
ENSG00000106069	-2.25075	4.36002	-12.6051	6.1034e-16	7.99686e-15
ENSG00000133958	1.50601	7.67601	18.5272	6.11643e-16	8.00871e-15
ENSG00000230580	3.67668	-2.33444	12.9129	6.1187e-16	8.00871e-15
ENSG00000177272	4.03345	1.55481	11.1122	6.14013e-16	8.03266e-15
ENSG00000224965	3.46819	-1.07817	11.1118	6.1484e-16	8.03937e-15
ENSG00000089199	3.25235	5.26827	18.9622	6.16426e-16	8.056e-15
ENSG00000284610	3.02991	1.65473	12.8885	6.17639e-16	8.06773e-15
ENSG00000187527	-2.63529	1.14471	-12.5575	6.2204e-16	8.12108e-15
ENSG00000115808	-1.73826	7.10539	-14.3603	6.25759e-16	8.16547e-15
ENSG00000232499	2.26311	2.90706	13.5735	6.27266e-16	8.18033e-15
ENSG00000228793	-4.79666	1.68024	-13.4395	6.27537e-16	8.18033e-15
ENSG00000136518	-2.51774	2.96836	-13.2335	6.29395e-16	8.20039e-15
ENSG00000106829	-1.88438	5.8439	-13.8567	6.3075e-16	8.21386e-15
ENSG00000036530	1.86258	5.18566	15.8906	6.33899e-16	8.25068e-15
ENSG00000223768	1.78904	5.72082	14.32	6.40616e-16	8.33387e-15
ENSG00000137449	-1.54695	6.55391	-12.935	6.41281e-16	8.33828e-15
ENSG00000169621	-2.38869	2.62424	-11.099	6.43529e-16	8.36326e-15
ENSG00000150938	1.47173	5.18923	11.1555	6.44922e-16	8.37712e-15
ENSG00000128487	-1.43181	8.78168	-15.8196	6.49964e-16	8.43834e-15
ENSG00000167281	5.93058	2.669	14.0407	6.69827e-16	8.68982e-15
ENSG00000283294	2.97533	2.13253	13.4432	6.70013e-16	8.68982e-15
ENSG00000107872	1.98162	2.41729	14.6676	6.74886e-16	8.74859e-15
ENSG00000020129	1.47517	6.79028	14.3432	6.76806e-16	8.76904e-15
ENSG00000130707	3.95651	1.91868	14.2059	6.78815e-16	8.79061e-15
ENSG00000259017	4.5041	-1.74754	13.0872	6.8091e-16	8.8133e-15
ENSG00000123977	4.74021	-1.0427	15.3025	6.83766e-16	8.84579e-15
ENSG00000185862	-5.2261	0.654399	-13.5509	6.87624e-16	8.89122e-15
ENSG00000197308	4.81065	-1.32325	13.7688	6.91845e-16	8.94128e-15
ENSG00000215244	-3.79093	1.94885	-14.6766	6.932e-16	8.95427e-15
ENSG00000267909	5.35181	0.533841	14.361	6.94791e-16	8.97029e-15
ENSG00000124795	-1.63435	5.66434	-12.72	6.98114e-16	9.00865e-15
ENSG00000204991	2.99423	5.15295	16.315	7.01285e-16	9.04502e-15
ENSG00000284966	-3.23805	1.08919	-13.4272	7.02918e-16	9.06063e-15
ENSG00000268182	2.81595	3.6348	14.1025	7.03203e-16	9.06063e-15
ENSG00000235189	-5.01579	-0.975681	-14.1311	7.05025e-16	9.07954e-15
ENSG00000084444	1.83991	4.98596	13.8452	7.0841e-16	9.11856e-15
ENSG00000144645	3.40194	3.22098	17.4784	7.10975e-16	9.14697e-15
ENSG00000075391	1.45566	7.11038	16.9822	7.12166e-16	9.1577e-15
ENSG00000248441	4.60105	1.34893	13.4875	7.13793e-16	9.17401e-15
ENSG00000114631	1.57749	6.47404	15.3307	7.15337e-16	9.18925e-15
ENSG00000215165	4.01206	-0.31331	11.1346	7.20183e-16	9.24687e-15
ENSG00000129566	-1.39463	5.67311	-14.7825	7.24669e-16	9.2998e-15
ENSG00000273507	-4.41754	0.477629	-13.4811	7.26035e-16	9.31266e-15
ENSG00000106144	-1.11012	5.14924	-11.13	7.27214e-16	9.32312e-15
[truncated: 23,617 more rows]

## Sheet: B
Multiple disease traits of Dopa neurons and Non-neurons at FDR < 0.05
Datasets	gwasTrait	gwas acronym	BETA	BETA_STD	SE	P
Dopa neurons	ADHD	ADHD	0.033561	0.016328	0.014554	0.010561
Non neurons	ADHD	ADHD	-0.023203	-0.011382	0.014416	0.94624
Non neurons	Amyotrophic lateral sclerosis	ALS	0.011337	0.0055547	0.013431	0.19931
Dopa neurons	Amyotrophic lateral sclerosis	ALS	-0.0044721	-0.0021736	0.013594	0.62891
Dopa neurons	Bipolar Disorder	BD	0.018618	0.009063	0.015315	0.11206
Non neurons	Bipolar Disorder	BD	0.0099224	0.0048709	0.01519	0.25681
Dopa neurons	Bipolar Disorder type I	BD I	0.051595	0.025116	0.015905	0.00059052
Non neurons	Bipolar Disorder type I	BD I	0.008158	0.0040039	0.015866	0.30357
Dopa neurons	Bipolar Disorder type II	BD II	0.030073	0.014638	0.013529	0.01312
Non neurons	Bipolar Disorder type II	BD II	-0.021408	-0.010506	0.013529	0.94321
Non neurons	Coronary Artery Disease	CAD	0.042344	0.020782	0.015354	0.0029124
Dopa neurons	Coronary Artery Disease	CAD	-0.001124	-0.00054711	0.015552	0.52881
Non neurons	Crohn's Disease	CD	0.058643	0.028789	0.015405	7.0687e-05
Dopa neurons	Crohn's Disease	CD	-0.028428	-0.01384	0.01548	0.96685
Non neurons	Height	Height	0.13364	0.065592	0.021377	2.0885e-10
Dopa neurons	Height	Height	-0.028477	-0.013864	0.021451	0.90783
Non neurons	Inflammatory Bowel Disease	IBD	0.047504	0.023321	0.015682	0.0012279
Dopa neurons	Inflammatory Bowel Disease	IBD	-0.031115	-0.015149	0.015868	0.97504
Dopa neurons	Major Depressive Disorder	MDD	0.0719	0.035001	0.016695	8.339e-06
Non neurons	Major Depressive Disorder	MDD	-0.0033349	-0.0016365	0.016666	0.5793
Non neurons	Multiple Sclerosis	MS	0.046553	0.022817	0.016639	0.0025756
Dopa neurons	Multiple Sclerosis	MS	-0.021333	-0.010372	0.016739	0.89873
Dopa neurons	Parkinson Disease	PD	0.048617	0.023653	0.016166	0.00132
Non neurons	Parkinson Disease	PD	0.028217	0.01384	0.015945	0.0384
Non neurons	Rheumatoid Arthritis	RA	0.050442	0.024759	0.015021	0.00039352
Dopa neurons	Rheumatoid Arthritis	RA	-0.039137	-0.019051	0.015173	0.99505
Dopa neurons	Schizophrenia	SCZ	0.085909	0.041786	0.018003	9.2074e-07
Non neurons	Schizophrenia	SCZ	0.028078	0.013768	0.017971	0.059109
Non neurons	Ulcerative Colitis	UC	0.032662	0.016034	0.014782	0.013577
Dopa neurons	Ulcerative Colitis	UC	-0.027175	-0.013229	0.014975	0.9652

## Sheet: C
Pathway analysis of Dopa and Non-neurons at FDR < 0.05
Set	Pathway	pval	odds.ratio	Bonf_AdjP
Dopa neurons	Synaptic Signaling (GO)	6.02076e-29	2.56449	8.27253e-25
Dopa neurons	Neuronal System (Re)	1.78373e-26	3.30014	2.45084e-22
Non-neurons	Interspecies Interaction Between Organisms (GO)	1.19513e-19	1.95955	1.6421e-15
Non-neurons	Reg. of Immune Response (GO)	4.3702e-16	1.84255	6.00465e-12
Non-neurons	Innate Immune Response (GO)	8.70128e-16	1.92651	1.19556e-11
Non-neurons	Cytokine Production (GO)	4.81571e-14	1.91915	6.61678e-10
Non-neurons	Inflammatory Response (GO)	1.89844e-12	1.91229	2.60846e-08
Non-neurons	Metabolism of RNA (Re)	2.19336e-12	1.78132	3.01368e-08
Dopa neurons	Neurotransmitter Receptors and Postsynaptic Signal Transmission (Re)	2.21496e-12	3.05468	3.04335e-08
Non-neurons	Response to Biotic Stimulus (GO)	3.55803e-12	1.74352	4.88873e-08
Non-neurons	Processing of Capped Intron Containing Pre mRNA (Re)	3.57833e-12	2.62906	4.91662e-08
Non-neurons	Reg. of Immune Effector Process (GO)	4.19594e-12	2.33959	5.76523e-08
Non-neurons	mRNA Metabolic Process (GO)	6.19763e-12	1.90449	8.51555e-08
Dopa neurons	Reg. of Membrane Potential (GO)	6.69348e-11	1.9845	9.19684e-07
Non-neurons	Reg. of Defense Response (GO)	7.95134e-11	1.7489	1.09251e-06
Dopa neurons	G Alpha S Signalling Events (Re)	1.2479e-10	3.06588	1.71461e-06
Non-neurons	Reg. of Multi Organism Process (GO)	1.44363e-10	2.1042	1.98355e-06
Non-neurons	Cytokine Mediated Signaling Pathway (GO)	1.69983e-10	1.72159	2.33556e-06
Non-neurons	Viral Gene Expression (GO)	1.78979e-10	2.72921	2.45917e-06
Non-neurons	Neg. Reg. of Transcription By RNA Polymerase II (GO)	2.08721e-10	1.63226	2.86782e-06
Dopa neurons	Sensory Perception (GO)	2.15905e-10	1.83764	2.96653e-06
Dopa neurons	Signal Release (GO)	2.18754e-10	1.92446	3.00568e-06
Dopa neurons	Neuroactive Ligand Receptor Interaction (KG)	2.75849e-10	2.56649	3.79017e-06
Dopa neurons	Behavior (GO)	3.86997e-10	1.75785	5.31734e-06
Non-neurons	Lymphocyte Activation (GO)	4.11062e-10	1.75425	5.64799e-06
Dopa neurons	Reg. of Postsynaptic Membrane Potential (GO)	1.11706e-09	3.10114	1.53484e-05
Non-neurons	Spliceosome (KG)	2.38915e-09	3.24496	3.2827e-05
Non-neurons	Immune System Development (GO)	2.60359e-09	1.55352	3.57733e-05
Non-neurons	Adaptive Immune Response (GO)	3.24654e-09	2.05733	4.46074e-05
Non-neurons	Reg. of Response to External Stimulus (GO)	5.83304e-09	1.6246	8.0146e-05
Non-neurons	Cellular Response to DNA Damage Stimulus (GO)	6.32905e-09	1.53576	8.69612e-05
Dopa neurons	Synapse Assembly (GO)	6.7357e-09	2.54104	9.25485e-05
Dopa neurons	Muscle Contraction (Re)	7.35989e-09	2.44792	0.000101125
Dopa neurons	Reg. of Synaptic Vesicle Cycle (GO)	7.56797e-09	3.22385	0.000103984
Non-neurons	Cytoplasmic Pattern Recognition Receptor Signaling Pathway (GO)	7.72912e-09	6.73907	0.000106198
Dopa neurons	Synapse Organization (GO)	8.00511e-09	1.8142	0.00010999
Non-neurons	Neg. Reg. of Immune System Process (GO)	9.88536e-09	1.8798	0.000135825
Non-neurons	Chromatin Organization (GO)	1.02358e-08	1.58385	0.00014064
Dopa neurons	Monovalent Inorganic Cation Transport (GO)	1.07335e-08	1.75446	0.000147478
Non-neurons	Response to Virus (GO)	1.22565e-08	2.08744	0.000168404
Non-neurons	Reg. of Inflammatory Response (GO)	1.63312e-08	2.10872	0.000224391
Dopa neurons	Vesicle Mediated Transport in Synapse (GO)	2.40004e-08	2.27405	0.000329766
Dopa neurons	Reg. of Synaptic Plasticity (GO)	2.75465e-08	2.39212	0.00037849
Non-neurons	Reg. of RNA Metabolic Process (GO)	4.1435e-08	2.2175	0.000569316
Dopa neurons	Pos. Reg. of Calcium Ion Dependent Exocytosis (GO)	5.55522e-08	Inf	0.000763288
Non-neurons	Peptidyl Lysine Modification (GO)	6.12746e-08	1.80209	0.000841913
Non-neurons	Translational Initiation (GO)	6.31088e-08	2.3319	0.000867115
Dopa neurons	Calcium Signaling Pathway (KG)	6.78947e-08	2.44253	0.000932873
Dopa neurons	Reg. of Ion Transport (GO)	9.65245e-08	1.57498	0.00132625
Dopa neurons	Multicellular Organismal Signaling (GO)	1.23836e-07	2.26532	0.00170151
Non-neurons	Viral Life Cycle (GO)	1.90158e-07	1.89861	0.00261276
Non-neurons	Neg. Reg. of Defense Response (GO)	1.98538e-07	2.3662	0.00272791
Non-neurons	Leukocyte Cell Cell Adhesion (GO)	2.27843e-07	1.90868	0.00313056
Dopa neurons	Protein Protein Interactions AT Synapses (Re)	2.28923e-07	3.32031	0.0031454
Non-neurons	Interferon Signaling (Re)	3.22958e-07	2.23931	0.00443744
Non-neurons	Interleukin 6 Production (GO)	3.56476e-07	2.90671	0.00489798
Non-neurons	Neg. Reg. of Multi Organism Process (GO)	3.61313e-07	2.54764	0.00496445
Non-neurons	Reg. of Cell Adhesion (GO)	3.62987e-07	1.53598	0.00498744
Non-neurons	Pos. Reg. of Cell Activation (GO)	3.67774e-07	1.91949	0.00505321
Dopa neurons	Neuropeptide Signaling Pathway (GO)	3.76772e-07	3.98005	0.00517684
Non-neurons	Reg. of Adaptive Immune Response (GO)	4.08223e-07	2.56607	0.00560898
Non-neurons	Response to Interferon Gamma (GO)	4.15963e-07	2.37597	0.00571533
Non-neurons	Myc Repress Pathway (PI)	4.4124e-07	4.62036	0.00606264
Non-neurons	Smad2 3nuclear Pathway (PI)	4.88025e-07	3.84096	0.00670546
Non-neurons	Nuclear Transcribed mRNA Catabolic Process (GO)	4.90569e-07	2.093	0.00674042
Non-neurons	Cytokine Secretion (GO)	5.66396e-07	2.26698	0.00778228
Dopa neurons	Reg. of Neurotransmitter Transport (GO)	9.10903e-07	2.40993	0.0125158
Non-neurons	Protein Localization to Endoplasmic Reticulum (GO)	9.16778e-07	2.45257	0.0125965
Dopa neurons	Neurotransmitter Release Cycle (Re)	9.57539e-07	5.21855	0.0131566
Dopa neurons	Cardiac Muscle Contraction (KG)	1.0116e-06	3.82674	0.0138993
Non-neurons	B-Cell Activation (GO)	1.02907e-06	2.08596	0.0141394
Non-neurons	rRNA Processing (Re)	1.1966e-06	2.06696	0.0164413
Non-neurons	Leukocyte Migration (GO)	1.31591e-06	1.75012	0.0180806
Non-neurons	Pos. Reg. of Inflammatory Response (GO)	1.39265e-06	2.87153	0.019135
Non-neurons	Activation of Innate Immune Response (GO)	1.50623e-06	1.84223	0.0206957
Non-neurons	Selenoamino Acid Metabolism (Re)	1.53434e-06	2.61323	0.0210818
Non-neurons	I kappaB Kinase NF kappaB Signaling (GO)	1.64856e-06	1.91999	0.0226512
Dopa neurons	Synaptic Transmission GABAergic (GO)	1.66393e-06	5.5037	0.0228623
Non-neurons	Reg. of Proteolysis (GO)	1.66932e-06	1.49481	0.0229364
Non-neurons	Activation of The mRNA Upon Binding of The Cap Binding Complex and Eifs and Subsequent Binding to 43S (Re)	1.91307e-06	4.11344	0.0262856
Non-neurons	Response to Type I Interferon (GO)	2.32875e-06	3.19689	0.031997
Non-neurons	Immunoregulatory Interactions Between a Lymphoid and a Non Lymphoid Cell (Re)	2.49676e-06	2.91688	0.0343055
Non-neurons	Chromatin Organization (Re)	2.51444e-06	1.90703	0.0345484
Dopa neurons	Dopamine Neurotransmitter Release Cycle (Re)	2.81836e-06	22.4457	0.0387243
Non-neurons	Alpha Beta T-Cell Activation (GO)	3.16331e-06	2.54958	0.0434638
Non-neurons	Reg. of Response to Biotic Stimulus (GO)	3.16331e-06	2.54958	0.0434638
Non-neurons	Autoimmune Thyroid Disease (KG)	3.17175e-06	12.2373	0.0435799
Non-neurons	Reg. of Catabolic Process (GO)	3.39026e-06	1.37472	0.0465822
Dopa neurons	Potassium Channels (Re)	3.59066e-06	2.7875	0.0493357
Dopa neurons	Reg. of Neurotransmitter Levels (GO)	3.7258e-06	1.70909	0.0511925
Non-neurons	Humoral Immune Response (GO)	3.82757e-06	2.41687	0.0525908
Non-neurons	Cytokine Signaling in Immune System (Re)	4.0624e-06	1.41945	0.0558174
Dopa neurons	G Protein Coupled Receptor Signaling Pathway Coupled to Cyclic Nucleotide Second Messenger (GO)	4.15678e-06	1.98437	0.0571141
Dopa neurons	Cognition (GO)	4.26237e-06	1.76572	0.0585649
Non-neurons	Systemic Lupus Erythematosus (KG)	4.27274e-06	3.39433	0.0587074
Non-neurons	Neg. Reg. of Proteolysis (GO)	4.37979e-06	1.80671	0.0601784
Dopa neurons	Metal Ion Transport (GO)	4.58647e-06	1.40224	0.0630182
Non-neurons	Response to Molecule of Bacterial Origin (GO)	4.62397e-06	1.78859	0.0635334
Non-neurons	Interferon Gamma Signaling (Re)	4.87365e-06	3.02819	0.0669639
Dopa neurons	Voltage Gated Potassium Channels (Re)	5.02e-06	5.70507	0.0689747
Non-neurons	Reg. of Gene Expression Epigenetic (GO)	5.14182e-06	1.72126	0.0706486
Non-neurons	Reg. of Nucleobase Containing Compound Metabolic Process (GO)	5.30874e-06	1.52981	0.0729421
Dopa neurons	Action Potential (GO)	5.53347e-06	2.38413	0.0760299
Dopa neurons	Reg. of Cardiac Conduction (GO)	5.9497e-06	3.42716	0.0817489
Dopa neurons	Anion Transport (GO)	6.06533e-06	1.49942	0.0833377
Dopa neurons	Oxidative Phosphorylation (GO)	6.43122e-06	2.34871	0.0883649
Non-neurons	Interaction With Host (GO)	6.91195e-06	1.98948	0.0949702
Non-neurons	Neg. Reg. of Catabolic Process (GO)	7.19508e-06	1.75943	0.0988604
Non-neurons	Viral Myocarditis (KG)	7.46279e-06	3.69104	0.102539
Non-neurons	Production of Molecular Mediator Involved in Inflammatory Response (GO)	7.61804e-06	4.05131	0.104672
Non-neurons	Immune Response Regulating Cell Surface Receptor Signaling Pathway (GO)	7.77787e-06	1.6406	0.106868
Dopa neurons	Amine Ligand Binding Receptors (Re)	7.80082e-06	7.21736	0.107183
Non-neurons	Neg. Reg. of Cytokine Production (GO)	7.85282e-06	1.87923	0.107898
Non-neurons	Glial Cell Development (GO)	8.29619e-06	2.52803	0.11399
Dopa neurons	Phase 0 Rapid Depolarisation (Re)	8.30698e-06	4.68058	0.114138
Dopa neurons	Vesicle Localization (GO)	8.63409e-06	1.68668	0.118632
Non-neurons	Gliogenesis (GO)	8.79954e-06	1.76514	0.120906
Non-neurons	Reg. of Cellular Response to Stress (GO)	9.62341e-06	1.42511	0.132226
Dopa neurons	Synaptic Transmission Glutamatergic (GO)	9.90682e-06	2.63833	0.13612
Non-neurons	Neg. Reg. of Cell Population Proliferation (GO)	1.07338e-05	1.44217	0.147482
Non-neurons	Leukocyte Mediated Immunity (GO)	1.0874e-05	1.4266	0.149409
Non-neurons	Neg. Reg. of Innate Immune Response (GO)	1.09252e-05	4.843	0.150112
Non-neurons	Organic Cyclic Compound Catabolic Process (GO)	1.12472e-05	1.46024	0.154536
Non-neurons	Pos. Reg. of Response to External Stimulus (GO)	1.12507e-05	1.8082	0.154584
Dopa neurons	Activation of NMDA Receptors and Postsynaptic Events (Re)	1.21744e-05	2.74858	0.167276
Dopa neurons	Learning (GO)	1.29545e-05	2.14623	0.177995
Non-neurons	DNA Replication (KG)	1.43857e-05	5.8363	0.197659
Dopa neurons	Generation of Precursor Metabolites and Energy (GO)	1.53796e-05	1.50715	0.211316
Non-neurons	Tumor Necrosis Factor Superfamily Cytokine Production (GO)	1.59472e-05	2.37469	0.219115
Non-neurons	Neg. Reg. of Response to Biotic Stimulus (GO)	1.64229e-05	5.178	0.225651
Non-neurons	Reg. of Hemopoiesis (GO)	1.7418e-05	1.55928	0.239323
Dopa neurons	Memory (GO)	1.76417e-05	2.33366	0.242397
Non-neurons	Protein Catabolic Process (GO)	1.77789e-05	1.35744	0.244283
Dopa neurons	Amine Transport (GO)	1.83026e-05	2.70161	0.251478
Dopa neurons	Pos. Reg. of Synaptic Transmission (GO)	1.92891e-05	1.99089	0.265032
Non-neurons	Interleukin 1 Production (GO)	2.1145e-05	3.06304	0.290532
Dopa neurons	Pos. Reg. of Synapse Assembly (GO)	2.124e-05	2.97448	0.291837
Dopa neurons	Protein Localization to Synapse (GO)	2.242e-05	2.7266	0.308051
Dopa neurons	Huntingtons Disease (KG)	2.31233e-05	1.95874	0.317715
Dopa neurons	Cellular Respiration (GO)	2.41162e-05	1.91865	0.331357
Non-neurons	Type I Interferon Production (GO)	2.4709e-05	2.23838	0.339501
Non-neurons	Reg. of Viral Life Cycle (GO)	2.4709e-05	2.23838	0.339501
Non-neurons	Activation of HOX Genes During Differentiation (Re)	2.61785e-05	2.88014	0.359693
Dopa neurons	Cell Cell Adhesion Via Plasma Membrane Adhesion Molecules (GO)	3.03642e-05	1.72721	0.417204
Dopa neurons	Feeding Behavior (GO)	3.26314e-05	2.91458	0.448356
Non-neurons	Neg. Reg. of Immune Response (GO)	3.2829e-05	2.25905	0.451071
Non-neurons	Chromosome Maintenance (Re)	3.4738e-05	2.77815	0.4773
Non-neurons	Lymphocyte Activation Involved in Immune Response (GO)	3.56882e-05	2.13005	0.490356
Non-neurons	Maintenance of Cell Number (GO)	3.61655e-05	2.03567	0.496914
Dopa neurons	Alzheimers Disease (KG)	3.68201e-05	1.98097	0.505909
Non-neurons	Extrinsic Apoptotic Signaling Pathway (GO)	3.72885e-05	1.79665	0.512344
Dopa neurons	Reg. of Cation Transmembrane Transport (GO)	3.78143e-05	1.62326	0.519568
Dopa neurons	Reg. of Short Term Neuronal Synaptic Plasticity (GO)	3.85247e-05	Inf	0.52933
Dopa neurons	GABA Receptor Activation (Re)	3.8749e-05	3.47766	0.532412
Non-neurons	Posttranscriptional Reg. of Gene Expression (GO)	4.00092e-05	1.42346	0.549726
Dopa neurons	Adenylate Cyclase Inhibiting G Protein Coupled Receptor Signaling Pathway (GO)	4.12917e-05	2.70262	0.567348
Dopa neurons	Pos. Reg. of Dendritic Spine Morphogenesis (GO)	4.25995e-05	18.1613	0.585318
Dopa neurons	Potassium Ion Transport (GO)	4.65074e-05	1.78523	0.639012
Non-neurons	Reg. of B-Cell Activation (GO)	5.76483e-05	2.30915	0.792088
Dopa neurons	Oxidative Phosphorylation (KG)	5.82649e-05	2.2048	0.80056
Non-neurons	Cell Cycle (Re)	6.19318e-05	1.40053	0.850942
Non-neurons	Cellular Response to Abiotic Stimulus (GO)	6.59103e-05	1.61113	0.905607
Non-neurons	Intestinal Immune Network For IgA Production (KG)	6.75031e-05	5.26937	0.927492
Non-neurons	Reg. of Protein Stability (GO)	6.95538e-05	1.64824	0.955669
Non-neurons	Protein Modification By Small Protein Removal (GO)	7.01605e-05	1.63635	0.964005
Non-neurons	Cell Chemotaxis (GO)	7.13798e-05	1.76717	0.980758
Non-neurons	Amb2 Neutrophils Pathway (PI)	7.32075e-05	4.70536	1
Non-neurons	Reg. of Extracellular Matrix Organization (GO)	7.32075e-05	4.70536	1
Non-neurons	Pos. Reg. of Catabolic Process (GO)	7.36903e-05	1.4989	1
Non-neurons	Sumoylation (Re)	7.53198e-05	1.87196	1
Dopa neurons	The Citric Acid TCA Cycle and Respiratory Electron Transport (Re)	7.56411e-05	1.88233	1
Non-neurons	Peptidyl Lysine Trimethylation (GO)	7.68904e-05	4.00052	1
Non-neurons	Pos. Reg. of Cell Death (GO)	7.8104e-05	1.37783	1
Non-neurons	Reproduction (Re)	8.1237e-05	2.4353	1
Dopa neurons	Reg. of System Process (GO)	8.29828e-05	1.42409	1
Non-neurons	mRNA Export From Nucleus (GO)	8.35559e-05	2.221	1
Non-neurons	Integrin Mediated Signaling Pathway (GO)	8.74042e-05	2.35703	1
Dopa neurons	Aerobic Respiration (GO)	8.92266e-05	2.51387	1
Non-neurons	Interleukin 8 Production (GO)	9.25527e-05	3.11499	1
Non-neurons	Interleukin 10 Signaling (Re)	9.95512e-05	5.87949	1
Non-neurons	Pos. Reg. of NIK NF kappaB Signaling (GO)	0.000103638	2.82593	1
Non-neurons	mRNA Transcription (GO)	0.000105922	9.40238	1
Non-neurons	Cellular Senescence (Re)	0.000108767	1.90747	1
Dopa neurons	Amino Acid Transport (GO)	0.000111906	1.99785	1
Non-neurons	Reg. of Gliogenesis (GO)	0.000115093	2.19029	1
Non-neurons	RNA 3 End Processing (GO)	0.000116636	1.97531	1
Dopa neurons	Cyclic Nucleotide Biosynthetic Process (GO)	0.000117759	9.61343	1
Non-neurons	B-Cell Receptor Signaling Pathway (GO)	0.000118705	3.66055	1
Non-neurons	Reg. of Viral Induced Cytoplasmic Pattern Recognition Receptor Signaling Pathway (GO)	0.000119106	15.9838	1
Non-neurons	DNA Dependent DNA Replication Maintenance of Fidelity (GO)	0.000121861	3.88233	1
Non-neurons	Multi Organism Cellular Process (GO)	0.000122351	4.16754	1
Dopa neurons	Drug Transport (GO)	0.000132465	1.78285	1
Dopa neurons	Glutamate Secretion (GO)	0.000136457	3.52911	1
Non-neurons	Amyloid Fiber Formation (Re)	0.000139316	3.04213	1
Non-neurons	DDX58 IFIH1 Mediated Induction of Interferon Alpha Beta (Re)	0.000152449	2.7667	1
Dopa neurons	Cilium Movement (GO)	0.00015518	3.20866	1
Non-neurons	Endothelium Development (GO)	0.000160363	2.11477	1
Non-neurons	Translation (Re)	0.000160583	1.55954	1
Non-neurons	Leukocyte Proliferation (GO)	0.000163897	1.64316	1
Non-neurons	Homologous Recombination (KG)	0.000167718	5.64355	1
Non-neurons	Alpha Beta T-Cell Proliferation (GO)	0.000167718	5.64355	1
Non-neurons	Cytokine Metabolic Process (GO)	0.000170984	2.28391	1
Non-neurons	T-Cell Differentiation (GO)	0.000171833	1.72274	1
Dopa neurons	GPCR Ligand Binding (Re)	0.000171974	1.54475	1
Non-neurons	Methylation (GO)	0.000172769	1.5272	1
Non-neurons	Necrotic Cell Death (GO)	0.000175298	3.38857	1
Non-neurons	PCAF Pathway (Bi)	0.000182626	Inf	1
Non-neurons	Phagocytosis (GO)	0.000187421	1.65402	1
Non-neurons	Myeloid Dendritic Cell Activation (GO)	0.000187781	8.93183	1
Non-neurons	Neg. Reg. of MET Activity (Re)	0.000187781	8.93183	1
Non-neurons	DNA Repair (Re)	0.000190124	1.5357	1
Non-neurons	Myd88 Dependent Toll Like Receptor Signaling Pathway (GO)	0.000193516	4.39048	1
Dopa neurons	Insulin Secretion (GO)	0.00019518	1.74543	1
Non-neurons	Cell Killing (GO)	0.000197039	2.29957	1
Non-neurons	Leishmania Infection (KG)	0.000198268	2.65935	1
Dopa neurons	Cell Communication Involved in Cardiac Conduction (GO)	0.000201902	3.04407	1
Non-neurons	Response to Endoplasmic Reticulum Stress (GO)	0.000218493	1.57937	1
Non-neurons	Interleukin 6 Biosynthetic Process (GO)	0.000218957	15.0418	1
Dopa neurons	Microtubule Based Movement (GO)	0.00022074	1.58468	1
Non-neurons	Reg. of mRNA Splicing Via Spliceosome (GO)	0.000237645	2.24736	1
Non-neurons	Myeloid Cell Differentiation (GO)	0.00024154	1.49926	1
Non-neurons	Cytokine Cytokine Receptor Interaction (KG)	0.000243987	1.84892	1
Dopa neurons	Serotonin Receptor Signaling Pathway (GO)	0.000249243	6.76502	1
Non-neurons	Neg. Reg. of Hemopoiesis (GO)	0.000251886	2.01708	1
Dopa neurons	Excitatory Synapse Assembly (GO)	0.000255606	5.60862	1
Non-neurons	Ribonucleoprotein Complex Biogenesis (GO)	0.000257753	1.42429	1
Dopa neurons	Glutamate Receptor Signaling Pathway (GO)	0.00027749	2.14161	1
Non-neurons	Macrophage Activation (GO)	0.00027928	2.44912	1
Non-neurons	Astrocyte Differentiation (GO)	0.00027928	2.44912	1
Non-neurons	RB 1pathway (PI)	0.000279605	2.82447	1
Non-neurons	Cellular Amide Metabolic Process (GO)	0.000282982	1.27779	1
Non-neurons	Neg. Reg. of Type I Interferon Production (GO)	0.000286755	3.45043	1
Non-neurons	NOD Like Receptor Signaling Pathway (KG)	0.000310841	2.89652	1
Non-neurons	Cellular Defense Response (GO)	0.00031207	4.2331	1
Dopa neurons	Aerobic Electron Transport Chain (GO)	0.000317061	14.9515	1
Non-neurons	Antigen Processing and Presentation (KG)	0.000325011	2.64827	1
Non-neurons	Reg. of Viral Transcription (GO)	0.000325011	2.64827	1
Non-neurons	in Utero Embryonic Development (GO)	0.00033117	1.50397	1
Non-neurons	Ensheathment of Neurons (GO)	0.000331394	1.96053	1
Dopa neurons	Pos. Reg. of Synaptic Vesicle Transport (GO)	0.000340548	Inf	1
Dopa neurons	Membrane Depolarization During Action Potential (GO)	0.000342556	3.96903	1
Non-neurons	Neg. Reg. of Catalytic Activity (GO)	0.000370516	1.32561	1
Non-neurons	Pos. Reg. of Multi Organism Process (GO)	0.000373628	1.78055	1
Non-neurons	rRNA Metabolic Process (GO)	0.000377749	1.6697	1
Dopa neurons	Sensory Perception of Pain (GO)	0.000383344	2.17919	1
Dopa neurons	Glutamate Binding Activation of AMPA Receptors and Synaptic Plasticity (Re)	0.000385606	4.27376	1
Non-neurons	Infectious Disease (Re)	0.000396329	1.43957	1
Non-neurons	Neg. Reg. of Viral Genome Replication (GO)	0.000410416	3.19944	1
Non-neurons	Membrane Protein Proteolysis (GO)	0.000411688	2.75686	1
Non-neurons	Extrinsic Apoptotic Signaling Pathway Via Death Domain Receptors (GO)	0.000421475	2.31209	1
Dopa neurons	Striated Muscle Contraction (GO)	0.000438008	1.78636	1
Non-neurons	Toll Like Receptor Signaling Pathway (GO)	0.000439725	1.93545	1
Dopa neurons	Cyclic Nucleotide Mediated Signaling (GO)	0.000440051	1.71896	1
Non-neurons	Reg. of Myeloid Leukocyte Mediated Immunity (GO)	0.000441925	3.34542	1
Non-neurons	Apoptotic Signaling Pathway (GO)	0.000462606	1.34754	1
Non-neurons	Lymphocyte Mediated Immunity (GO)	0.000466792	1.67364	1
Dopa neurons	Circulatory System Process (GO)	0.000479832	1.38621	1
Dopa neurons	Transport of Small Molecules (Re)	0.000484351	1.31229	1
Non-neurons	Pos. Reg. of Cell Population Proliferation (GO)	0.000494508	1.28709	1
Non-neurons	Telomere Organization (GO)	0.000505563	1.77591	1
Non-neurons	Protein Targeting to Membrane (GO)	0.000506567	1.66274	1
Dopa neurons	Electron Transport Chain (GO)	0.000510046	1.72231	1
Non-neurons	Interferon Beta Production (GO)	0.000512632	2.9018	1
Non-neurons	Neuroinflammatory Response (GO)	0.000512632	2.9018	1
Non-neurons	Hdacs Deacetylate Histones (Re)	0.000512632	2.9018	1
Dopa neurons	Adult Behavior (GO)	0.000544883	1.85685	1
Non-neurons	Response to Wounding (GO)	0.000550119	1.34127	1
Dopa neurons	Multi Organism Behavior (GO)	0.000566904	2.49574	1
Non-neurons	Pos. Reg. of Hydrolase Activity (GO)	0.000571864	1.30365	1
Dopa neurons	Dopamine Transport (GO)	0.000587528	2.93995	1
Dopa neurons	Reg. of Neuronal Synaptic Plasticity (GO)	0.000597631	2.7495	1
Non-neurons	Pos. Reg. of Proteolysis (GO)	0.000599548	1.46041	1
Non-neurons	Hivnef Pathway (Bi)	0.000602825	2.68927	1
Non-neurons	Modification of Morphology or Physiology of Other Organism (GO)	0.000610576	1.96829	1
Dopa neurons	Racc Pathway (Bi)	0.000614446	13.8823	1
Dopa neurons	Presynaptic Modulation of Chemical Synaptic Transmission (GO)	0.000614446	13.8823	1
Non-neurons	Il6 7 Pathway (PI)	0.000622535	3.10492	1
Non-neurons	DNA Replication (GO)	0.000633947	1.52361	1
Non-neurons	Protein Acylation (GO)	0.00068264	1.57036	1
Non-neurons	Granulocytes Pathway (Bi)	0.000687094	Inf	1
Non-neurons	Reg. of Glial Cell Migration (GO)	0.000687094	Inf	1
Non-neurons	Neg. Reg. of Cell Activation (GO)	0.000695981	1.70499	1
Dopa neurons	Serotonin Receptors (Re)	0.000704034	Inf	1
Non-neurons	Reg. of Nuclease Activity (GO)	0.000706221	5.95396	1
Non-neurons	ERBB Signaling Pathway (GO)	0.000709417	1.84087	1
Non-neurons	Neg. Reg. of Extrinsic Apoptotic Signaling Pathway (GO)	0.000729143	2.04689	1
Non-neurons	Asthma (KG)	0.000732766	13.1589	1
Non-neurons	Processive Synthesis On The Lagging Strand (Re)	0.000732766	13.1589	1
Non-neurons	Intrinsic Apoptotic Signaling Pathway (GO)	0.000751796	1.50639	1
Non-neurons	Reg. of Response to Cytokine Stimulus (GO)	0.000754954	1.75436	1
Dopa neurons	Sympathetic Nervous System Development (GO)	0.000759213	8.00776	1
Dopa neurons	Locomotory Behavior (GO)	0.00076249	1.64705	1
Non-neurons	Reg. of B-Cell Differentiation (GO)	0.000776135	4.93611	1
Non-neurons	Mitotic Prophase (Re)	0.000829783	1.97299	1
Dopa neurons	Sodium Ion Transport (GO)	0.000833482	1.63088	1
Non-neurons	Reg. of Response to Endoplasmic Reticulum Stress (GO)	0.000838315	2.15837	1
Dopa neurons	TP53 Regulates Metabolic Genes (Re)	0.000841057	2.13998	1
Non-neurons	Response to Epidermal Growth Factor (GO)	0.000847573	2.90818	1
Non-neurons	Interleukin 4 and Interleukin 13 Signaling (Re)	0.000849192	2.05243	1
Dopa neurons	Reg. of Hormone Levels (GO)	0.000877225	1.38082	1
Non-neurons	Nucleotide Binding Domain Leucine Rich Repeat Containing Receptor NLR Signaling Pathways (Re)	0.000877654	2.6217	1
Non-neurons	Pos. Reg. of NF kappaB Transcription Factor Activity (GO)	0.000878204	1.75145	1
Dopa neurons	Dendrite Development (GO)	0.000879887	1.5706	1
Dopa neurons	NCAM Signaling For Neurite Out Growth (Re)	0.000971937	2.36408	1
Non-neurons	Reg. of Protein Modification By Small Protein Conjugation or Removal (GO)	0.000983179	1.57753	1
Dopa neurons	Dendrite Extension (GO)	0.00107024	3.91643	1
Non-neurons	Cellular Responses to External Stimuli (Re)	0.0010783	1.34778	1
Non-neurons	Fcer1 Pathway (PI)	0.00111252	2.50966	1
Non-neurons	Reg. of DNA Dependent DNA Replication (GO)	0.00112108	2.74423	1
Non-neurons	Neg. Reg. of RNA Metabolic Process (GO)	0.00112108	2.74423	1
Non-neurons	Pos. Reg. of Leukocyte Mediated Immunity (GO)	0.00112876	1.97838	1
Dopa neurons	Oxidation Reduction Process (GO)	0.00113654	1.2463	1
Dopa neurons	Neuromuscular Process Controlling Posture (GO)	0.00118534	12.8135	1
Non-neurons	Reg. of Leukocyte Migration (GO)	0.00123094	1.71617	1
Non-neurons	Toll Like Receptor Cascades (Re)	0.00123094	1.71617	1
Non-neurons	TAK1 Activates Nfkb By Phosphorylation and Activation of Ikks Complex (Re)	0.00126143	3.76122	1
Non-neurons	Liver Regeneration (GO)	0.00126143	3.76122	1
Non-neurons	Reg. of Alpha Beta T-Cell Differentiation (GO)	0.00127019	2.55414	1
Non-neurons	Pos. Reg. of Intracellular Signal Transduction (GO)	0.00127038	1.24688	1
Non-neurons	Signal Transduction By P53 Class Mediator (GO)	0.00128414	1.48981	1
Non-neurons	Pos. Reg. of Hemopoiesis (GO)	0.00128924	1.66738	1
Non-neurons	Response to Peptidoglycan (GO)	0.0013326	Inf	1
Non-neurons	Reg. of Ribonuclease Activity (GO)	0.0013326	Inf	1
Non-neurons	Macrophage Apoptotic Process (GO)	0.0013326	Inf	1
Non-neurons	Stress Response to Metal Ion (GO)	0.0013326	Inf	1
Non-neurons	Leading Strand Synthesis (Re)	0.00133289	12.2178	1
Non-neurons	Sumoylation of DNA Damage Response and Repair Proteins (Re)	0.00133621	2.12882	1
Non-neurons	Cell Adhesion Molecules Cams (KG)	0.00136596	1.85842	1
Non-neurons	Oligodendrocyte Development (GO)	0.00140561	2.91597	1
Dopa neurons	GABA Synthesis Release Reuptake and Degradation (Re)	0.00142287	5.69437	1
Non-neurons	Pos. Reg. of Extrinsic Apoptotic Signaling Pathway (GO)	0.00144655	2.60551	1
Non-neurons	DNA Damage Telomere Stress Induced Senescence (Re)	0.00144655	2.60551	1
Non-neurons	Protein Modification By Small Protein Conjugation (GO)	0.00146525	1.24454	1
Non-neurons	Intracellular Receptor Signaling Pathway (GO)	0.00146688	1.48546	1
Non-neurons	Pos. Reg. of Leukocyte Proliferation (GO)	0.00152934	1.83364	1
Non-neurons	Reg. of Epithelial Cell Differentiation (GO)	0.00152934	1.83364	1
Non-neurons	Defense Response to Bacterium (GO)	0.00152934	1.83364	1
Dopa neurons	Central Nervous System Neuron Differentiation (GO)	0.00154573	1.66228	1
Dopa neurons	Neuron Migration (GO)	0.00154648	1.6975	1
Non-neurons	Reg. of DNA Binding Transcription Factor Activity (GO)	0.00156969	1.37513	1
Non-neurons	Protein Targeting (GO)	0.00157377	1.35892	1
Dopa neurons	Neuron Projection Guidance (GO)	0.00164071	1.47131	1
Non-neurons	NOTCH Signaling Pathway (KG)	0.00164234	2.66548	1
Dopa neurons	Postsynaptic Specialization Organization (GO)	0.00164838	3.08661	1
Non-neurons	Neg. Reg. of Cell Adhesion (GO)	0.00167349	1.50194	1
Non-neurons	SNARE Interactions in Vesicular Transport (KG)	0.00171136	3.17385	1
Non-neurons	Adaptive Immune System (Re)	0.00176673	1.26771	1
Non-neurons	Pos. Reg. of Transcription of NOTCH Receptor Target (GO)	0.00176851	7.04799	1
Non-neurons	ATP Dependent Chromatin Remodeling (GO)	0.00176917	2.22924	1
Non-neurons	B-Cell Proliferation (GO)	0.00176917	2.22924	1
Non-neurons	Reg. of Antigen Receptor Mediated Signaling Pathway (GO)	0.00182692	2.48661	1
Non-neurons	Natural Killer Cell Activation (GO)	0.00182692	2.48661	1
Non-neurons	Fra Pathway (PI)	0.00185693	3.35817	1
Dopa neurons	Pos. Reg. of Nervous System Development (GO)	0.00190702	1.31445	1
Non-neurons	Neg. Reg. of Cell Death (GO)	0.00195778	1.23347	1
Dopa neurons	Reg. of Exocytosis (GO)	0.00196179	1.52951	1
Non-neurons	BARD1 Pathway (PI)	0.00198218	3.60401	1
Non-neurons	Protein Deglycosylation (GO)	0.00198218	3.60401	1
Non-neurons	Reg. of TP53 Activity Through Acetylation (Re)	0.00198218	3.60401	1
Non-neurons	Astrocyte Activation (GO)	0.00200395	5.32579	1
Non-neurons	Oligodendrocyte Differentiation (GO)	0.00205315	1.95071	1
Non-neurons	Response to Interferon Beta (GO)	0.00208799	4.46479	1
Dopa neurons	Integration of Energy Metabolism (Re)	0.00210707	1.84295	1
Non-neurons	Double Strand Break Repair (GO)	0.00212459	1.50768	1
Non-neurons	DNA Biosynthetic Process (GO)	0.00217118	1.57203	1
Dopa neurons	Reg. of Signaling Receptor Activity (GO)	0.00218966	1.3627	1
Non-neurons	Vacuolar Transport (GO)	0.00224849	1.70056	1
Non-neurons	mRNA Splicing Minor Pathway (Re)	0.0022646	2.38356	1
Dopa neurons	Presynaptic Depolarization and Calcium Channel Opening (Re)	0.00227472	11.7367	1
Non-neurons	Cytosolic DNA Sensing Pathway (KG)	0.00233958	2.92567	1
Non-neurons	Neg. Reg. of I kappaB Kinase NF kappaB Signaling (GO)	0.00233958	2.92567	1
Non-neurons	Pos. Reg. of Cell Killing (GO)	0.00233958	2.92567	1
Non-neurons	PRI miRNA Transcription By RNA Polymerase II (GO)	0.00239002	2.58675	1
Non-neurons	Tube Development (GO)	0.00240216	1.22249	1
Dopa neurons	Cell Morphogenesis Involved in Differentiation (GO)	0.00240353	1.25308	1
Non-neurons	Gamma Delta T-Cell Activation (GO)	0.00241367	11.2771	1
Non-neurons	Reg. of RNA Binding (GO)	0.00241367	11.2771	1
Dopa neurons	Reg. of Muscle Contraction (GO)	0.00243503	1.66786	1
Non-neurons	Neg. Reg. of Developmental Process (GO)	0.00244795	1.23511	1
Non-neurons	Neg. Reg. of Autophagy (GO)	0.00247727	2.04648	1
Non-neurons	E2F Pathway (PI)	0.00248024	2.10657	1
Non-neurons	Process Utilizing Autophagic Mechanism (GO)	0.00249338	1.31663	1
Dopa neurons	Calcium Ion Transmembrane Transport (GO)	0.00252047	1.42423	1
Dopa neurons	Inhibitory Postsynaptic Potential (GO)	0.00254745	6.93806	1
Non-neurons	MDA 5 Signaling Pathway (GO)	0.00258438	Inf	1
Non-neurons	Response to Interleukin 6 (GO)	0.00259725	3.05588	1
Non-neurons	Response to Tumor Necrosis Factor (GO)	0.00261592	1.46154	1
Non-neurons	Signaling By ROBO Receptors (Re)	0.00263593	1.50483	1
Dopa neurons	Reg. of Cell Projection Organization (GO)	0.00265016	1.26339	1
Non-neurons	Cellular Response to Virus (GO)	0.00272209	2.65054	1
Dopa neurons	Membrane Depolarization (GO)	0.00272594	1.94812	1
Non-neurons	Histone H3 Acetylation (GO)	0.00276144	2.29339	1
Dopa neurons	Neuromuscular Process (GO)	0.00279892	1.87206	1
Dopa neurons	Proton Transmembrane Transport (GO)	0.00283497	1.67006	1
Non-neurons	Intrinsic Apoptotic Signaling Pathway in Response to DNA Damage (GO)	0.00284093	1.82655	1
Non-neurons	AP1 Pathway (PI)	0.00285205	2.19566	1
Non-neurons	Dendritic Cell Differentiation (GO)	0.00285352	3.2234	1
Non-neurons	Neg. Reg. of Extrinsic Apoptotic Signaling Pathway Via Death Domain Receptors (GO)	0.00285352	3.2234	1
Dopa neurons	Long Term Potentiation (KG)	0.00289089	2.08977	1
Non-neurons	Chronic Myeloid Leukemia (KG)	0.00289318	2.05366	1
Dopa neurons	Response to Xenobiotic Stimulus (GO)	0.00294262	1.45898	1
Dopa neurons	Postsynapse Organization (GO)	0.00295759	1.5892	1
Non-neurons	Neg. Reg. of Gene Expression Epigenetic (GO)	0.00296711	1.85303	1
Non-neurons	ERAD Pathway (GO)	0.00296711	1.85303	1
Dopa neurons	Platelet Homeostasis (Re)	0.00296961	1.91784	1
Dopa neurons	Trigeminal Nerve Development (GO)	0.00300836	Inf	1
Non-neurons	P53 Pathway (Bi)	0.00305333	6.57724	1
Non-neurons	Pos. Reg. of Leukocyte Degranulation (GO)	0.00305333	6.57724	1
Non-neurons	Detection of Biotic Stimulus (GO)	0.00305333	6.57724	1
Non-neurons	Reg. of Extracellular Matrix Disassembly (GO)	0.00305333	6.57724	1
Non-neurons	Histone H4 K5 Acetylation (GO)	0.00305333	6.57724	1
Non-neurons	Neg. Reg. of Smooth Muscle Cell Differentiation (GO)	0.00305333	6.57724	1
Non-neurons	Reg. of Chromosome Organization (GO)	0.00307503	1.3864	1
Non-neurons	Interleukin 12 Production (GO)	0.00308845	2.72714	1
Non-neurons	Leukocyte Adhesion to Vascular Endothelial Cell (GO)	0.00309117	3.44684	1
Dopa neurons	Central Nervous System Neuron Development (GO)	0.00311298	1.97424	1
Dopa neurons	Brain Morphogenesis (GO)	0.00314716	3.07084	1
Dopa neurons	Sialic Acid Metabolism (Re)	0.00314716	3.07084	1
Non-neurons	NIK NF kappaB Signaling (GO)	0.00315271	1.61835	1
Non-neurons	Neg. Reg. of Protein Modification Process (GO)	0.0031639	1.28191	1
Non-neurons	Neg. Reg. of Cell Cycle G1 S Phase Transition (GO)	0.00316429	1.80051	1
Non-neurons	Reg. of Cysteine Type Endopeptidase Activity (GO)	0.00318991	1.49269	1
Non-neurons	Homeostasis of Number of Cells (GO)	0.00327233	1.47773	1
Non-neurons	Deadenylation of mRNA (Re)	0.00328292	3.75974	1
Non-neurons	Reg. of Viral Entry Into Host Cell (GO)	0.00328292	3.75974	1
Non-neurons	Leukocyte Transendothelial Migration (KG)	0.00331937	1.82453	1
Non-neurons	Inflammasomes (Re)	0.00334002	5.01183	1
Non-neurons	Tolerance Induction (GO)	0.00334002	5.01183	1
Non-neurons	Regulated Necrosis (Re)	0.00334002	5.01183	1
Non-neurons	Pos. Reg. of Phosphatidylinositol 3 Kinase Signaling (GO)	0.00334547	2.00528	1
Non-neurons	Homotypic Cell Cell Adhesion (GO)	0.00338006	2.06155	1
Dopa neurons	Gamma Aminobutyric Acid Signaling Pathway (GO)	0.00338396	3.84354	1
Non-neurons	Nthi Pathway (Bi)	0.00338678	4.22922	1
Non-neurons	Neg. Reg. of Nucleobase Containing Compound Metabolic Process (GO)	0.00338679	1.62617	1
Non-neurons	Transcriptional Activity of Smad2 Smad3:Smad4 Heterotrimer (Re)	0.003454	2.50804	1
Dopa neurons	Visual Behavior (GO)	0.00346335	2.35106	1
Dopa neurons	Axon Guidance (KG)	0.00346622	1.66019	1
Non-neurons	Vesicle Mediated Transport (Re)	0.00349586	1.25458	1
Non-neurons	Inositol Lipid Mediated Signaling (GO)	0.00362527	1.57649	1
Dopa neurons	Pos. Reg. of Dendrite Development (GO)	0.00362572	2.08714	1
Dopa neurons	Reg. of Postsynaptic Membrane Neurotransmitter Receptor Levels (GO)	0.00362572	2.08714	1
Non-neurons	Death Receptor Signalling (Re)	0.00363576	1.63465	1
Non-neurons	Mitotic Cell Cycle (GO)	0.00373649	1.20477	1
Non-neurons	Tgfbr Pathway (PI)	0.00386152	2.2343	1
Non-neurons	ncRNA Metabolic Process (GO)	0.00388316	1.31079	1
Non-neurons	Extracellular Structure Organization (GO)	0.00388416	1.34076	1
Dopa neurons	Synaptic Adhesion Like Molecules (Re)	0.00390676	4.27004	1
Non-neurons	Neg. Reg. of DNA Binding Transcription Factor Activity (GO)	0.00392443	1.62079	1
Non-neurons	DNA Double Strand Break Repair (Re)	0.00392669	1.60035	1
Non-neurons	RNA Polymerase II Transcription Termination (Re)	0.00395027	2.07026	1
Non-neurons	Hes Hey Pathway (PI)	0.00396026	2.56471	1
Dopa neurons	Microtubule Bundle Formation (GO)	0.0040257	2.04088	1
Non-neurons	Pos. Reg. of Organelle Organization (GO)	0.00404027	1.26344	1
Non-neurons	DNA Conformation Change (GO)	0.00405196	1.44124	1
Non-neurons	Nucleic Acid Phosphodiester Bond Hydrolysis (GO)	0.00412749	1.41117	1
Dopa neurons	Reg. of Cellular Localization (GO)	0.00421535	1.21342	1
Non-neurons	Pos. Reg. of mRNA Catabolic Process (GO)	0.00428798	2.38747	1
Dopa neurons	Melanogenesis (KG)	0.00430244	1.79319	1
Dopa neurons	Acetylcholine Binding and Downstream Events (Re)	0.0043389	10.6702	1
Non-neurons	Lym Pathway (Bi)	0.00434843	10.3301	1
Non-neurons	Yap1 and WWTR1 Taz Stimulated Gene Expression (Re)	0.00434843	10.3301	1
Non-neurons	Reverse Cholesterol Transport (GO)	0.00434843	10.3301	1
Non-neurons	MHC Pathway (Bi)	0.00434843	10.3301	1
Non-neurons	Neg. Reg. of PRI miRNA Transcription By RNA Polymerase II (GO)	0.00434843	10.3301	1
Non-neurons	TNFR1 Induced Proapoptotic Signaling (Re)	0.00434843	10.3301	1
Non-neurons	TP53 Regulates Transcription of Caspase Activators and Caspases (Re)	0.00434843	10.3301	1
Dopa neurons	Neuron Recognition (GO)	0.00434878	2.36597	1
Dopa neurons	Reg. of Action Potential (GO)	0.00434878	2.36597	1
Non-neurons	Neg. Reg. of B-Cell Activation (GO)	0.00435037	3.08867	1
Non-neurons	Reg. of Defense Response to Virus By Host (GO)	0.00435037	3.08867	1
Dopa neurons	SLC Mediated Transmembrane Transport (Re)	0.00435655	1.45687	1
Dopa neurons	Second Messenger Mediated Signaling (GO)	0.0043607	1.34148	1
Dopa neurons	Synaptic Vesicle Priming (GO)	0.00436671	4.98108	1
Dopa neurons	Establishment of Protein Localization to Postsynaptic Membrane (GO)	0.00436671	4.98108	1
Non-neurons	Pos. Reg. of Intrinsic Apoptotic Signaling Pathway (GO)	0.0044921	2.25753	1
Non-neurons	Adherens Junction (KG)	0.00449236	1.9641	1
Dopa neurons	O Linked Glycosylation (Re)	0.00458887	1.77253	1
Dopa neurons	Nephric Duct Development (GO)	0.00461069	6.40343	1
Dopa neurons	Calcium Ion Regulated Exocytosis of Neurotransmitter (GO)	0.00461069	6.40343	1
Dopa neurons	Pos. Reg. of Circadian Rhythm (GO)	0.00461069	6.40343	1
Dopa neurons	Reduction of Cytosolic Caplusplus Levels (Re)	0.00461069	6.40343	1
Non-neurons	Cell Cycle DNA Replication (GO)	0.00461841	2.0799	1
Dopa neurons	Synaptic Transmission Cholinergic (GO)	0.00464088	3.38152	1
Dopa neurons	Reg. of Dendrite Morphogenesis (GO)	0.0046566	1.82839	1
Non-neurons	Anatomical Structure Homeostasis (GO)	0.00476779	1.32898	1
Non-neurons	Protein Methylation (GO)	0.0047702	1.54955	1
Non-neurons	Reg. of Response to DNA Damage Stimulus (GO)	0.00477467	1.47657	1
Non-neurons	Pos. Reg. of Interleukin 2 Production (GO)	0.00478152	3.28971	1
Non-neurons	CXCR4 Pathway (PI)	0.00478554	1.769	1
Dopa neurons	Pos. Reg. of Neurotransmitter Transport (GO)	0.00487687	2.67037	1
Dopa neurons	Interaction Between L1 and Ankyrins (Re)	0.00490972	2.93692	1
Non-neurons	Protein DNA Complex Subunit Organization (GO)	0.00494802	1.44851	1
Dopa neurons	Reg. of Potassium Ion Transport (GO)	0.00498997	1.80469	1
Non-neurons	Asbcell Pathway (Bi)	0.00501169	Inf	1
Non-neurons	Interleukin 18 Production (GO)	0.00501169	Inf	1
Dopa neurons	Cardiac Muscle Cell Action Potential Involved in Contraction (GO)	0.00501412	2.2795	1
Dopa neurons	Mitochondrial Protein Import (Re)	0.00505032	2.03595	1
Non-neurons	Neg. Reg. of Response to External Stimulus (GO)	0.00505584	1.38948	1
Non-neurons	Reg. of Phagocytosis (GO)	0.00511805	1.92146	1
Non-neurons	N Glycan Trimming in The ER and Calnexin Calreticulin Cycle (Re)	0.00515647	2.71599	1
Non-neurons	Neg. Reg. of Adaptive Immune Response (GO)	0.00515647	2.71599	1
Non-neurons	T-Cell Mediated Cytotoxicity (GO)	0.00515647	2.71599	1
Non-neurons	Mitotic Recombination (GO)	0.00516789	3.57127	1
Non-neurons	Reg. of Execution Phase of Apoptosis (GO)	0.00516789	3.57127	1
Non-neurons	Neg. Reg. of Intracellular Signal Transduction (GO)	0.00519746	1.28919	1
Non-neurons	DNA Pk Pathway (PI)	0.0052337	6.10662	1
Non-neurons	Neg. Reg. of Cell Killing (GO)	0.0052337	6.10662	1
Non-neurons	Chemokine Secretion (GO)	0.0052337	6.10662	1
Non-neurons	Cellular Response to Mechanical Stimulus (GO)	0.0052615	1.96757	1
Non-neurons	Cell Division (GO)	0.00531388	1.25877	1
Non-neurons	Histone H4 Acetylation (GO)	0.00536122	2.02294	1
Non-neurons	AR Pathway (PI)	0.00540171	2.09064	1
Non-neurons	Pos. Reg. of Macrophage Activation (GO)	0.00544797	3.99372	1
Non-neurons	Neg. Reg. of Actin Filament Bundle Assembly (GO)	0.00544797	3.99372	1
Non-neurons	DNA Strand Elongation (GO)	0.00544797	3.99372	1
Non-neurons	Neuronal Stem Cell Population Maintenance (GO)	0.00544797	3.99372	1
Non-neurons	T-Helper 17 Type Immune Response (GO)	0.00544797	3.99372	1
Non-neurons	TRAF6 Mediated NF Kb Activation (Re)	0.00544797	3.99372	1
Non-neurons	Pos. Reg. of Lipid Storage (GO)	0.00552224	4.69795	1
Non-neurons	Cd8 Pos. Alpha Beta T-Cell Activation (GO)	0.00552224	4.69795	1
Dopa neurons	WNT Ligand Biogenesis and Trafficking (Re)	0.00556033	3.63025	1
Dopa neurons	Reg. of Behavior (GO)	0.00571255	2.20384	1
Non-neurons	TNF Signaling (Re)	0.00571809	2.47891	1
Non-neurons	Pos. Reg. of Apoptotic Signaling Pathway (GO)	0.00573604	1.52014	1
Non-neurons	Intrinsic Apoptotic Signaling Pathway By P53 Class Mediator (GO)	0.0057902	1.88223	1
Dopa neurons	Platelet Calcium Homeostasis (Re)	0.00604874	3.05087	1
Dopa neurons	Startle Response (GO)	0.00604874	3.05087	1
Dopa neurons	cGMP Mediated Signaling (GO)	0.00604874	3.05087	1
Dopa neurons	Long Term Memory (GO)	0.006083	2.72929	1
Dopa neurons	Assembly and Cell Surface Presentation of NMDA Receptors (Re)	0.006083	2.72929	1
Non-neurons	Telomerase Pathway (PI)	0.00616586	1.9714	1
Non-neurons	Neg. Reg. of Leukocyte Proliferation (GO)	0.00616586	1.9714	1
Dopa neurons	Reg. of Heart Rate (GO)	0.0061912	1.79364	1
Non-neurons	Interstrand Cross Link Repair (GO)	0.00626167	2.19454	1
Non-neurons	Heterotypic Cell Cell Adhesion (GO)	0.00626167	2.19454	1
Non-neurons	Reg. of Epidermis Development (GO)	0.00628025	2.03011	1
Non-neurons	Interleukin 2 Production (GO)	0.00632052	2.10259	1
Non-neurons	Mitotic DNA Integrity Checkpoint (GO)	0.0063551	1.70001	1
Dopa neurons	Mpr Pathway (Bi)	0.00655843	4.00254	1
Dopa neurons	Nos1 Pathway (Bi)	0.00655843	4.00254	1
Non-neurons	rRNA Modification (GO)	0.00657657	2.95397	1
Non-neurons	Response to Interleukin 1 (GO)	0.00659293	1.51397	1
Dopa neurons	Phospholipase C Activating G Protein Coupled Receptor Signaling Pathway (GO)	0.006707	1.83274	1
Dopa neurons	EPHB Fwd Pathway (PI)	0.00687848	2.4034	1
Dopa neurons	Reg. of Dendritic Spine Morphogenesis (GO)	0.00687848	2.4034	1
Dopa neurons	Dopamine Receptor Signaling Pathway (GO)	0.00687848	2.4034	1
Non-neurons	Response to Lipid (GO)	0.00702609	1.20718	1
Non-neurons	Reg. of Translational Initiation (GO)	0.00703181	1.92454	1
Non-neurons	Glial Cell Proliferation (GO)	0.00705568	2.35069	1
Dopa neurons	Acid Secretion (GO)	0.00711645	1.6887	1
Non-neurons	Interferon Gamma Production (GO)	0.00727306	1.8125	1
Non-neurons	Endosomal Transport (GO)	0.00730005	1.43174	1
Non-neurons	Signaling By NOTCH3 (Re)	0.00731066	2.21665	1
Non-neurons	Interferon Alpha Production (GO)	0.0073318	3.13262	1
Dopa neurons	Tricarboxylic Acid Cycle (GO)	0.00733989	2.56319	1
Dopa neurons	L1CAM Interactions (Re)	0.00737463	1.6289	1
Dopa neurons	Reg. of Postsynaptic Density Organization (GO)	0.00753779	4.62458	1
Non-neurons	NFAT Tfpathway (PI)	0.00756253	2.6112	1
Non-neurons	Reg. of Myelination (GO)	0.00756253	2.6112	1
Dopa neurons	Class C 3 Metabotropic Glutamate Pheromone Receptors (Re)	0.00758236	2.80303	1
Non-neurons	P53 Downstream Pathway (PI)	0.00759101	1.58309	1
Dopa neurons	Sensory Perception of Light Stimulus (GO)	0.0076261	1.50524	1
Dopa neurons	Nucleoside Phosphate Biosynthetic Process (GO)	0.0077322	1.37366	1
Non-neurons	Production of Molecular Mediator of Immune Response (GO)	0.00774776	1.52065	1
Non-neurons	Blymphocyte Pathway (Bi)	0.00778767	9.39115	1
Non-neurons	Histone H2B Ubiquitination (GO)	0.00778767	9.39115	1
Non-neurons	Nucleotide Binding Oligomerization Domain Containing 2 Signaling Pathway (GO)	0.00778767	9.39115	1
Non-neurons	Pos. Reg. of Leukocyte Adhesion to Vascular Endothelial Cell (GO)	0.00778767	9.39115	1
Non-neurons	Multi Organism Localization (GO)	0.0079583	1.88176	1
Non-neurons	Vasculogenesis (GO)	0.0079583	1.88176	1
Dopa neurons	Keratinization (GO)	0.0079593	2.30071	1
Non-neurons	Mismatch Repair (KG)	0.0080624	3.38284	1
Non-neurons	Pos. Reg. of Interleukin 1 Secretion (GO)	0.0080624	3.38284	1
Non-neurons	Osteoblast Proliferation (GO)	0.0080624	3.38284	1
Non-neurons	Neg. Reg. of Leukocyte Mediated Immunity (GO)	0.00819064	2.39312	1
Non-neurons	Establishment of Endothelial Barrier (GO)	0.00819064	2.39312	1
Non-neurons	T-Cell Selection (GO)	0.00819064	2.39312	1
Non-neurons	DNA Damage Recognition in Gg Ner (Re)	0.00819064	2.39312	1
Dopa neurons	GABA Pathway (Bi)	0.00821753	9.60242	1
Dopa neurons	Forebrain Morphogenesis (GO)	0.00821753	9.60242	1
Dopa neurons	Protein O Linked Glycosylation Via Serine (GO)	0.00821753	9.60242	1
Dopa neurons	Opioid Receptor Signaling Pathway (GO)	0.00821753	9.60242	1
Dopa neurons	Neurotoxicity of Clostridium Toxins (Re)	0.00821753	9.60242	1
Dopa neurons	Cell Migration in Hindbrain (GO)	0.00826632	5.86894	1
Non-neurons	Lysosome Localization (GO)	0.00863343	2.04707	1
Non-neurons	Type I Diabetes Mellitus (KG)	0.0086538	2.70224	1
Non-neurons	Blastocyst Formation (GO)	0.0086538	2.70224	1
Non-neurons	Neg. Reg. of Signal Transduction in Absence of Ligand (GO)	0.0086538	2.70224	1
Non-neurons	Lipopolysaccharide Mediated Signaling Pathway (GO)	0.00866518	2.13156	1
Non-neurons	Neg. Reg. of Proteasomal Protein Catabolic Process (GO)	0.00866518	2.13156	1
Dopa neurons	Taste Transduction (KG)	0.00866661	2.4273	1
Non-neurons	ATM Pathway (Bi)	0.00868429	3.75827	1
Non-neurons	NOTCH4 Intracellular Domain Regulates Transcription (Re)	0.00868429	3.75827	1
Non-neurons	CTLA4 Pathway (Bi)	0.00889834	5.63612	1
Non-neurons	Mmp Cytokine Connection (SA)	0.00889834	5.63612	1
Non-neurons	Reg. of Antigen Processing and Presentation (GO)	0.00889834	5.63612	1
Non-neurons	Entry of Bacterium Into Host Cell (GO)	0.00889834	5.63612	1
Non-neurons	Reg. of Helicase Activity (GO)	0.00889834	5.63612	1
Non-neurons	Midbody Abscission (GO)	0.00889834	5.63612	1
Non-neurons	Pos. Reg. of Cytokine Production Involved in Inflammatory Response (GO)	0.00889834	5.63612	1
Non-neurons	RNA Methylation (GO)	0.00894436	1.84254	1
Dopa neurons	Calcium Ion Import (GO)	0.00899764	1.87032	1
Dopa neurons	Exploration Behavior (GO)	0.00903718	3.41613	1
Non-neurons	TRAF6 Mediated IRF7 Activation (Re)	0.00904916	4.38415	1
Non-neurons	Reg. of Programmed Necrotic Cell Death (GO)	0.00904916	4.38415	1
Non-neurons	Reg. of Microglial Cell Activation (GO)	0.00904916	4.38415	1
Non-neurons	Tumor Necrosis Factor Secretion (GO)	0.00904916	4.38415	1
Dopa neurons	Inner Mitochondrial Membrane Organization (GO)	0.00908271	2.2127	1
Non-neurons	Reg. of Cellular Component Movement (GO)	0.00928634	1.18744	1
Non-neurons	Animal Organ Regeneration (GO)	0.00933929	1.88153	1
Non-neurons	Natural Killer Cell Mediated Cytotoxicity (KG)	0.00941476	1.66744	1
Non-neurons	Activation of GTPase Activity (GO)	0.00946545	1.7774	1
Non-neurons	Reg. of Lipid Localization (GO)	0.00953173	1.60745	1
Dopa neurons	Developmental Growth Involved in Morphogenesis (GO)	0.0095382	1.40052	1
Non-neurons	T-Cell Receptor Signaling Pathway (GO)	0.00960516	1.45505	1
Non-neurons	DNA Recombination (GO)	0.00965513	1.36749	1
Non-neurons	Interaction With Symbiont (GO)	0.00968703	1.92833	1
Dopa neurons	Nucleoside Triphosphate Biosynthetic Process (GO)	0.00969333	1.83828	1
Non-neurons	T-Helper 17 Cell Lineage Commitment (GO)	0.00971817	Inf	1
Non-neurons	Leukocyte Apoptotic Process (GO)	0.00983727	1.72532	1
Non-neurons	Neg. Reg. of Production of Molecular Mediator of Immune Response (GO)	0.00985257	2.81936	1
Non-neurons	Exit From Mitosis (GO)	0.00985257	2.81936	1
Non-neurons	Reg. of Superoxide Metabolic Process (GO)	0.00985257	2.81936	1
Non-neurons	Microtubule Organizing Center Localization (GO)	0.00985257	2.81936	1
Non-neurons	Chromosome Segregation (GO)	0.00993977	1.34058	1
Non-neurons	Lipid Storage (GO)	0.00996256	1.98558	1
Dopa neurons	Pyruvate Metabolism and Citric Acid TCA Cycle (Re)	0.010031	2.01806	1
Non-neurons	Signaling By Non Receptor Tyrosine Kinases (Re)	0.0101326	2.05719	1
Non-neurons	Pi3kci Pathway (PI)	0.0101531	2.1492	1
Non-neurons	RHO Gtpases Activate Formins (Re)	0.0101678	1.56934	1
Non-neurons	Peptidyl Tyrosine Modification (GO)	0.0102084	1.32402	1
Dopa neurons	Protein Localization to Cilium (GO)	0.0102415	2.1364	1
Non-neurons	Reg. of Cell Shape (GO)	0.0104882	1.52137	1
Non-neurons	Response to Osmotic Stress (GO)	0.0104955	1.84061	1
Non-neurons	Chemokine Production (GO)	0.0104955	1.84061	1
Dopa neurons	Response to Calcium Ion (GO)	0.0107038	1.5255	1
Dopa neurons	Retinal Ganglion Cell Axon Guidance (GO)	0.0108861	3.73598	1
Dopa neurons	Reflex (GO)	0.0108861	3.73598	1
Dopa neurons	Retina Layer Formation (GO)	0.0108861	3.73598	1
Dopa neurons	G Alpha Q Signalling Events (Re)	0.0109139	1.45256	1
Dopa neurons	Dopaminergic Neuron Differentiation (GO)	0.0109349	2.45607	1
Non-neurons	Protein Autoubiquitination (GO)	0.0109681	1.88129	1
Non-neurons	Fc Gamma R Mediated Phagocytosis (KG)	0.0109734	1.66091	1
Non-neurons	Neg. Reg. of Interleukin 6 Production (GO)	0.0109945	2.50643	1
Non-neurons	Nuclear Transcribed mRNA Poly a Tail Shortening (GO)	0.0109945	2.50643	1
Non-neurons	Cellular Response to Osmotic Stress (GO)	0.0109945	2.50643	1
Non-neurons	Activation of Cysteine Type Endopeptidase Activity Involved in Apoptotic Process (GO)	0.0110903	1.77316	1
Non-neurons	Modulation of Transcription in Other Organism Involved in Symbiotic Interaction (GO)	0.011137	2.97558	1
Non-neurons	Superoxide Anion Generation (GO)	0.011137	2.97558	1
Dopa neurons	Reg. of Secretion (GO)	0.0113441	1.20549	1
Non-neurons	Chromatin Remodeling (GO)	0.0114706	1.4872	1
Dopa neurons	Modulation of Excitatory Postsynaptic Potential (GO)	0.0114802	2.21824	1
Non-neurons	Reg. of Transferase Activity (GO)	0.0115473	1.1783	1
Dopa neurons	Gluconeogenesis (Re)	0.0115839	2.66918	1
Non-neurons	RAC1 Reg Pathway (PI)	0.0116345	2.30736	1
Non-neurons	Antimicrobial Humoral Response (GO)	0.0116345	2.30736	1
Non-neurons	Protein K48 Linked Ubiquitination (GO)	0.0117084	1.99148	1
Dopa neurons	NLS Bearing Protein Import Into Nucleus (GO)	0.0117267	3.02456	1
Dopa neurons	Long Term Potentiation (Re)	0.0117267	3.02456	1
Non-neurons	Regeneration (GO)	0.0117352	1.46703	1
Non-neurons	Cellular Extravasation (GO)	0.011901	2.06868	1
Non-neurons	Neg. Reg. of Cytokine Secretion (GO)	0.011901	2.06868	1
Non-neurons	Neg. Reg. of Tumor Necrosis Factor Superfamily Cytokine Production (GO)	0.0119023	2.16959	1
Non-neurons	Sumoylation of DNA Replication Proteins (Re)	0.0119023	2.16959	1
Non-neurons	Ossification (GO)	0.0119145	1.29673	1
Non-neurons	Pos. Reg. of Autophagy (GO)	0.0119351	1.61008	1
Non-neurons	Neg. Reg. of Cell Cycle Phase Transition (GO)	0.0120449	1.37693	1
Non-neurons	Neg. Reg. of Cell Cycle (GO)	0.0120698	1.22046	1
Non-neurons	Chromosome Localization (GO)	0.0123245	1.83852	1
Non-neurons	P53hypoxia Pathway (Bi)	0.012456	3.19446	1
Non-neurons	Integrin2 Pathway (PI)	0.012456	3.19446	1
Non-neurons	Reg. of Signaling By CBL (Re)	0.012456	3.19446	1
Non-neurons	Reg. of Androgen Receptor Signaling Pathway (GO)	0.012456	3.19446	1
Non-neurons	Diseases of Immune System (Re)	0.012456	3.19446	1
Dopa neurons	Organelle Transport Along Microtubule (GO)	0.0125525	1.73221	1
Non-neurons	Neg. Reg. of Apoptotic Signaling Pathway (GO)	0.0126692	1.39071	1
Non-neurons	Reg. of Endothelial Cell Differentiation (GO)	0.0126986	2.58442	1
Dopa neurons	Pyrimidine Containing Compound Transmembrane Transport (GO)	0.012851	Inf	1
Dopa neurons	PGC1A Pathway (Bi)	0.0128637	4.26818	1
Dopa neurons	Post Anal Tail Morphogenesis (GO)	0.0128637	4.26818	1
Non-neurons	Gene Silencing By RNA (GO)	0.0129781	1.45034	1
Non-neurons	Nucleobase Containing Compound Transport (GO)	0.0129803	1.36736	1
Non-neurons	Protein Sumoylation (GO)	0.0130019	1.7686	1
Non-neurons	Stress Activated Protein Kinase Signaling Cascade (GO)	0.0131176	1.33235	1
Non-neurons	Protein Localization to Vacuole (GO)	0.0133878	1.93308	1
Non-neurons	Protein Polyubiquitination (GO)	0.0134003	1.31573	1
Dopa neurons	Anion Transmembrane Transport (GO)	0.0134075	1.35443	1
Non-neurons	Toll Like Receptor Signaling Pathway (KG)	0.0134587	1.71368	1
Non-neurons	Neg. Reg. of Protein Catabolic Process (GO)	0.0136137	1.55435	1
Non-neurons	Response to Growth Factor (GO)	0.0136579	1.20473	1
Non-neurons	Tid Pathway (Bi)	0.0137056	3.52289	1
Non-neurons	Nfkb Pathway (Bi)	0.0137056	3.52289	1
Non-neurons	Tgfb Pathway (Bi)	0.0137056	3.52289	1
Non-neurons	Hif1a Pathway (PI)	0.0137056	3.52289	1
Non-neurons	Neg. Reg. of Interleukin 1 Production (GO)	0.0137056	3.52289	1
Non-neurons	Response to Muramyl Dipeptide (GO)	0.0137056	3.52289	1
Non-neurons	PERK Mediated Unfolded Protein Response (GO)	0.0137056	3.52289	1
Non-neurons	Protein Targeting to Lysosome (GO)	0.0137056	3.52289	1
Non-neurons	Interleukin 2 Biosynthetic Process (GO)	0.0137056	3.52289	1
Non-neurons	Tumor Necrosis Factor Biosynthetic Process (GO)	0.0137056	3.52289	1
Non-neurons	B-Cell Mediated Immunity (GO)	0.013734	1.66943	1
Non-neurons	Response to Cadmium Ion (GO)	0.0137726	1.99815	1
Non-neurons	Reg. of mRNA Catabolic Process (GO)	0.0138076	1.41324	1
Non-neurons	Endosomal Vacuolar Pathway (Re)	0.0138504	8.45202	1
Non-neurons	Reg. of Dendritic Cell Differentiation (GO)	0.0138504	8.45202	1
Non-neurons	Trophectodermal Cell Differentiation (GO)	0.0138504	8.45202	1
Non-neurons	Btg2 Pathway (Bi)	0.0138504	8.45202	1
Non-neurons	Extracellular Matrix Constituent Secretion (GO)	0.0138504	8.45202	1
Non-neurons	Leukocyte Aggregation (GO)	0.0138504	8.45202	1
Non-neurons	Protein Localization to Cell Cortex (GO)	0.0138504	8.45202	1
Non-neurons	Neg. Reg. of Inclusion Body Assembly (GO)	0.0138504	8.45202	1
Non-neurons	Inflammatory Response to Wounding (GO)	0.0138504	8.45202	1
Non-neurons	Reg. of Neutrophil Activation (GO)	0.0138504	8.45202	1
Non-neurons	NOTCH2 Intracellular Domain Regulates Transcription (Re)	0.0138504	8.45202	1
Non-neurons	MET Receptor Recycling (Re)	0.0138504	8.45202	1
Non-neurons	RUNX3 Regulates P14 ARF (Re)	0.0138504	8.45202	1
Dopa neurons	Neural Retina Development (GO)	0.0138667	1.95843	1
Non-neurons	Neg. Reg. of MAPK Cascade (GO)	0.013879	1.47048	1
Non-neurons	Ubiquitin Mediated Proteolysis (KG)	0.013908	1.50651	1
Non-neurons	Reg. of Humoral Immune Response (GO)	0.0139893	2.08185	1
Non-neurons	Ruffle Organization (GO)	0.0139893	2.08185	1
Non-neurons	Reg. of Ubiquitin Protein Transferase Activity (GO)	0.0139893	2.08185	1
Non-neurons	Neg. Reg. of RNA Catabolic Process (GO)	0.0139893	2.08185	1
Dopa neurons	Pallium Development (GO)	0.0140534	1.45445	1
Dopa neurons	Long Term Depression (KG)	0.0140688	1.84547	1
Dopa neurons	Reg. of Neurological System Process (GO)	0.0141443	1.52782	1
Non-neurons	Interleukin 1 Family Signaling (Re)	0.0142362	1.52236	1
Non-neurons	Transcriptional Reg. By RUNX1 (Re)	0.0144157	1.40678	1
Non-neurons	Lymphocyte Migration (GO)	0.0144838	1.83625	1
Dopa neurons	Axonemal Dynein Complex Assembly (GO)	0.0145134	3.20208	1
Dopa neurons	DARPP-32 Events (Re)	0.0145628	2.74502	1
Dopa neurons	Innervation (GO)	0.0145628	2.74502	1
Dopa neurons	Detection of Stimulus (GO)	0.0146405	1.33632	1
Dopa neurons	Barrestin Pathway (Bi)	0.0146598	5.3346	1
Dopa neurons	Mitochondrial Electron Transport Ubiquinol to Cytochrome C (GO)	0.0146598	5.3346	1
Dopa neurons	Reg. of Skeletal Muscle Adaptation (GO)	0.0146598	5.3346	1
Dopa neurons	Ganglion Development (GO)	0.0146598	5.3346	1
Dopa neurons	Synaptic Vesicle Docking (GO)	0.0146598	5.3346	1
Dopa neurons	Synaptic Vesicle Maturation (GO)	0.0146598	5.3346	1
Dopa neurons	Sodium Ion Import Across Plasma Membrane (GO)	0.0146598	5.3346	1
Dopa neurons	Inhibitory Synapse Assembly (GO)	0.0146598	5.3346	1
Non-neurons	Lair Pathway (Bi)	0.0146819	4.07044	1
Non-neurons	PML Pathway (Bi)	0.0146819	4.07044	1
Non-neurons	Th1th2 Pathway (Bi)	0.0146819	4.07044	1
Non-neurons	Integrin5 Pathway (PI)	0.0146819	4.07044	1
Non-neurons	NRIF Signals Cell Death From The Nucleus (Re)	0.0146819	4.07044	1
Non-neurons	Neg. Reg. of Ubiquitin Protein Transferase Activity (GO)	0.0146819	4.07044	1
Non-neurons	Lamellipodium Morphogenesis (GO)	0.0146819	4.07044	1
Non-neurons	P75ntr Signals Via NF Kb (Re)	0.0146819	4.07044	1
Non-neurons	FOXO Mediated Transcription of Cell Cycle Genes (Re)	0.0146819	4.07044	1
Non-neurons	Transcriptional Reg. By RUNX3 (Re)	0.0149693	1.61322	1
Non-neurons	G1 and S Phases (SA)	0.0149896	5.16574	1
Non-neurons	Neg. Reg. of Interleukin 12 Production (GO)	0.0149896	5.16574	1
Non-neurons	Response to Topologically Incorrect Protein (GO)	0.0150369	1.40049	1
Dopa neurons	Mitochondrial Membrane Organization (GO)	0.0150436	1.50988	1
Dopa neurons	Transmission of Nerve Impulse (GO)	0.015102	1.81171	1
Non-neurons	Protein Ubiquitination (Re)	0.0152526	1.76367	1
Non-neurons	Temperature Homeostasis (GO)	0.0153682	1.45253	1
Dopa neurons	Lipid Digestion (GO)	0.0154322	8.53427	1
Dopa neurons	Response to Histamine (GO)	0.0154322	8.53427	1
Dopa neurons	Reg. of Synaptic Vesicle Fusion to Presynaptic Active Zone Membrane (GO)	0.0154322	8.53427	1
Dopa neurons	AV Node Cell to Bundle of His Cell Communication (GO)	0.0154322	8.53427	1
Dopa neurons	SA Node Cell to Atrial Cardiac Muscle Cell Communication (GO)	0.0154322	8.53427	1
Dopa neurons	Activation of PPARGC1A Pgc 1alpha By Phosphorylation (Re)	0.0154322	8.53427	1
Dopa neurons	Opioid Signalling (Re)	0.0154709	1.65186	1
Dopa neurons	Polysaccharide Metabolic Process (GO)	0.0156773	1.58989	1
Non-neurons	Leukocyte Homeostasis (GO)	0.0157533	1.70725	1
Non-neurons	Platelet Derived Growth Factor Receptor Signaling Pathway (GO)	0.0157609	1.93591	1
Non-neurons	T-Cell Differentiation Involved in Immune Response (GO)	0.0157609	1.93591	1
Non-neurons	Glomerulus Development (GO)	0.0157609	1.93591	1
Non-neurons	Pos. Reg. of Viral Life Cycle (GO)	0.0157609	1.93591	1
Non-neurons	EPO Pathway (PI)	0.0158362	2.4017	1
Non-neurons	Peptidyl Tyrosine Autophosphorylation (GO)	0.0158362	2.4017	1
Non-neurons	Interleukin 6 Secretion (GO)	0.0158362	2.4017	1
Non-neurons	Termination of Translesion DNA Synthesis (Re)	0.0158362	2.4017	1
Dopa neurons	Response to Bronchodilator (GO)	0.0159482	2.00262	1
Non-neurons	Gland Morphogenesis (GO)	0.0159762	1.56857	1
Dopa neurons	Signalling to Erks (Re)	0.0161156	2.34894	1
Dopa neurons	Neutral Amino Acid Transport (GO)	0.0161156	2.34894	1
Non-neurons	Antigen Processing Cross Presentation (Re)	0.0161461	1.62525	1
Non-neurons	Arf6 Trafficking Pathway (PI)	0.0162169	2.00573	1
Non-neurons	Virion Assembly (GO)	0.0163812	2.22162	1
Non-neurons	Interleukin 10 Production (GO)	0.0163812	2.22162	1
Non-neurons	Macrophage Migration (GO)	0.0163812	2.22162	1
Non-neurons	Response to Chemokine (GO)	0.0164588	2.09701	1
Non-neurons	Sumoylation of Transcription Cofactors (Re)	0.0164588	2.09701	1
Non-neurons	Hematopoietic Progenitor Cell Differentiation (GO)	0.0167295	1.45376	1
Non-neurons	Reg. of Stem Cell Population Maintenance (GO)	0.016746	2.81863	1
Non-neurons	Nucleotide Excision Repair (Re)	0.0167802	1.53225	1
Dopa neurons	Specification of Symmetry (GO)	0.0169103	1.56452	1
Non-neurons	Reg. of Protein Catabolic Process (GO)	0.0169823	1.26863	1
Non-neurons	Ribosomal Small Subunit Biogenesis (GO)	0.0170362	1.83378	1
Non-neurons	Myeloid Leukocyte Differentiation (GO)	0.0170445	1.41999	1
Non-neurons	Cell Surface Interactions AT The Vascular Wall (Re)	0.0170809	1.55288	1
Non-neurons	Epigenetic Reg. of Gene Expression (Re)	0.0170809	1.55288	1
Non-neurons	Endocytosis (KG)	0.0170836	1.40607	1
Dopa neurons	Multicellular Organismal Response to Stress (GO)	0.0171784	1.75228	1
Non-neurons	Cellular Response to External Stimulus (GO)	0.0172044	1.29573	1
Dopa neurons	Starch and Sucrose Metabolism (KG)	0.0174932	2.53537	1
Dopa neurons	Reg. of Vesicle Fusion (GO)	0.0174932	2.53537	1
Dopa neurons	Cell Communication By Electrical Coupling (GO)	0.0174932	2.53537	1
Dopa neurons	Cilium or Flagellum Dependent Cell Motility (GO)	0.0174932	2.53537	1
Dopa neurons	Synaptic Membrane Adhesion (GO)	0.0174932	2.53537	1
Non-neurons	Cell Cycle Checkpoint (GO)	0.0174948	1.36736	1
Dopa neurons	Chrebp Pathway (Bi)	0.0178438	3.46852	1
Dopa neurons	Atrial Cardiac Muscle Cell to AV Node Cell Signaling (GO)	0.0178438	3.46852	1
Dopa neurons	Reg. of Presynaptic Cytosolic Calcium Ion Concentration (GO)	0.0178438	3.46852	1
Dopa neurons	ABC Transporters in Lipid Homeostasis (Re)	0.0178438	3.46852	1
Non-neurons	Reg. of Cytokine Production Involved in Immune Response (GO)	0.0179055	1.75834	1
Dopa neurons	Nitric Oxide Stimulates Guanylate Cyclase (Re)	0.0183088	2.84625	1
Dopa neurons	Energy Coupled Proton Transport Down Electrochemical Gradient (GO)	0.0183088	2.84625	1
Dopa neurons	Pyruvate Metabolic Process (GO)	0.0183088	2.84625	1
Dopa neurons	Axonal Fasciculation (GO)	0.0183088	2.84625	1
Non-neurons	P73pathway (PI)	0.0184485	1.70033	1
Non-neurons	Granulocyte Migration (GO)	0.0184485	1.70033	1
Non-neurons	S1P S1P3 Pathway (PI)	0.0184521	2.46664	1
Non-neurons	B-Cell Homeostasis (GO)	0.0184521	2.46664	1
Non-neurons	Reg. of Tumor Necrosis Factor Mediated Signaling Pathway (GO)	0.0185748	1.93912	1
Non-neurons	Membrane Invagination (GO)	0.0189948	1.79123	1
Dopa neurons	Amyotrophic Lateral Sclerosis ALS (KG)	0.0189993	1.89882	1
Non-neurons	Nfkappab Canonical Pathway (PI)	0.0190405	3.00613	1
Non-neurons	Reg. of B-Cell Receptor Signaling Pathway (GO)	0.0190405	3.00613	1
Non-neurons	Response to Platelet Derived Growth Factor (GO)	0.0190405	3.00613	1
Non-neurons	Reg. of Homotypic Cell Cell Adhesion (GO)	0.0190405	3.00613	1
Non-neurons	B-Cell Apoptotic Process (GO)	0.0190405	3.00613	1
Non-neurons	Inclusion Body Assembly (GO)	0.0190405	3.00613	1
Dopa neurons	Protein O Linked Glycosylation (GO)	0.0191061	1.57523	1
Non-neurons	Skeletal System Development (GO)	0.0191144	1.23593	1
Non-neurons	Viral Messenger RNA Synthesis (Re)	0.0191162	2.01443	1
Non-neurons	ATM Pathway (PI)	0.0192313	2.25551	1
Non-neurons	Neg. Reg. of Organelle Assembly (GO)	0.0192313	2.25551	1
Non-neurons	Macrophage Differentiation (GO)	0.0192313	2.25551	1
Dopa neurons	Cellular Hormone Metabolic Process (GO)	0.0192545	1.70166	1
Non-neurons	Response to dsRNA (GO)	0.0193831	2.11482	1
Non-neurons	RNA Phosphodiester Bond Hydrolysis Exonucleolytic (GO)	0.0193831	2.11482	1
Non-neurons	Pdgfrb Pathway (PI)	0.0194609	1.47922	1
Non-neurons	Neg. Reg. of Cellular Component Organization (GO)	0.0195889	1.18916	1
Non-neurons	Reg. of Intracellular Steroid Hormone Receptor Signaling Pathway (GO)	0.0197269	1.72425	1
Dopa neurons	Organophosphate Ester Transport (GO)	0.0198243	1.56226	1
Non-neurons	Reg. of DNA Replication (GO)	0.0200817	1.56819	1
Dopa neurons	Pancreas Development (GO)	0.0201162	1.765	1
Non-neurons	Vascular Endothelial Growth Factor Receptor Signaling Pathway (GO)	0.0202674	1.59653	1
Non-neurons	T-Cell Mediated Immunity (GO)	0.0203012	1.63056	1
Dopa neurons	C21 Steroid Hormone Metabolic Process (GO)	0.0204763	2.37231	1
Dopa neurons	Pos. Reg. of Amine Transport (GO)	0.0204763	2.37231	1
Dopa neurons	Mitophagy (Re)	0.0204763	2.37231	1
Dopa neurons	NFAT 3pathway (PI)	0.0205287	1.85511	1
Dopa neurons	Gnrh Signaling Pathway (KG)	0.0207298	1.60307	1
Non-neurons	Protein Maturation (GO)	0.0208039	1.32519	1
Non-neurons	Cell Adhesion Mediated By Integrin (GO)	0.0210358	1.75254	1
Non-neurons	Postreplication Repair (GO)	0.0210527	1.88035	1
Non-neurons	HIV Life Cycle (Re)	0.0210543	1.42849	1
Non-neurons	Neg. Reg. of Binding (GO)	0.0210543	1.42849	1
Dopa neurons	Mesoderm Development (GO)	0.0212476	1.53822	1
Non-neurons	Reg. of Heterotypic Cell Cell Adhesion (GO)	0.0213934	3.28757	1
Non-neurons	Fluid Transport (GO)	0.0213934	3.28757	1
Non-neurons	Integrin Activation (GO)	0.0213934	3.28757	1
Non-neurons	HDAC Classiii Pathway (PI)	0.0214652	2.55021	1
Non-neurons	Respiratory Burst (GO)	0.0214652	2.55021	1
Non-neurons	Pos. Reg. of Chromosome Segregation (GO)	0.0214652	2.55021	1
Non-neurons	Protein Quality Control For Misfolded or Incompletely Synthesized Proteins (GO)	0.0214652	2.55021	1
Non-neurons	Vascular Endothelial Growth Factor Production (GO)	0.0214652	2.55021	1
Non-neurons	Myeloid Cell Apoptotic Process (GO)	0.0214652	2.55021	1
Dopa neurons	Dicarboxylic Acid Transport (GO)	0.0215803	1.58781	1
Non-neurons	Golgi Organization (GO)	0.0216149	1.4581	1
Non-neurons	B-Cell Receptor Signaling Pathway (KG)	0.0216168	1.69289	1
Dopa neurons	Ck1 Pathway (Bi)	0.0216703	3.91188	1
Dopa neurons	Vocalization Behavior (GO)	0.0216703	3.91188	1
Dopa neurons	Synaptic Vesicle Clustering (GO)	0.0216703	3.91188	1
Dopa neurons	SHC Mediated Cascade:FGFR4 (Re)	0.0216703	3.91188	1
Dopa neurons	Lgi Adam Interactions (Re)	0.0216703	3.91188	1
Dopa neurons	Reg. of Axonogenesis (GO)	0.0217186	1.37561	1
Dopa neurons	Actin Filament Based Movement (GO)	0.0217246	1.48375	1
Non-neurons	N Glycan Biosynthesis (KG)	0.0219176	1.94279	1
Non-neurons	RNA Polyadenylation (GO)	0.0219176	1.94279	1
Non-neurons	Reg. of Cell Junction Assembly (GO)	0.0219204	1.60829	1
Non-neurons	Response to Antineoplastic Agent (GO)	0.0219204	1.60829	1
Dopa neurons	Oocyte Meiosis (KG)	0.0219519	1.52707	1
Dopa neurons	Hindbrain Development (GO)	0.0220935	1.43818	1
Dopa neurons	Response to Gonadotropin (GO)	0.0221882	2.59216	1
Dopa neurons	Zinc Ion Transport (GO)	0.0221882	2.59216	1
Dopa neurons	Synapse Maturation (GO)	0.0221882	2.59216	1
Non-neurons	Hepaticobiliary System Development (GO)	0.0223598	1.47063	1
Non-neurons	G1 Phase (Re)	0.0225619	2.02451	1
Non-neurons	Reg. of Cell Cycle Checkpoint (GO)	0.022586	2.29699	1
Dopa neurons	Protein Transport Along Microtubule (GO)	0.0226078	1.7093	1
Non-neurons	Nuclear Transport (GO)	0.022715	1.26667	1
Non-neurons	Neg. Reg. of Leukocyte Apoptotic Process (GO)	0.0228514	2.13591	1
Non-neurons	Pos. Reg. of T-Cell Mediated Immunity (GO)	0.0228514	2.13591	1
Non-neurons	Neg. Reg. of DNA Replication (GO)	0.0228514	2.13591	1
Non-neurons	Reg. of TP53 Expression and Degradation (Re)	0.0228514	2.13591	1
Non-neurons	RNA Modification (GO)	0.0229486	1.4289	1
Dopa neurons	Intrinsic Pathway (Bi)	0.0230034	2.9881	1
Dopa neurons	Type B Pancreatic Cell Development (GO)	0.0230034	2.9881	1
Dopa neurons	Calcium Mediated Signaling Using Intracellular Calcium Source (GO)	0.0230034	2.9881	1
Dopa neurons	Cell Cell Adhesion Mediated By Cadherin (GO)	0.0231687	2.05332	1
Dopa neurons	Detection of Abiotic Stimulus (GO)	0.0233439	1.50627	1
Dopa neurons	Reg. of NMDA Receptor Activity (GO)	0.0234793	2.24186	1
Non-neurons	Reg. of IFNA Signaling (Re)	0.0235569	3.7568	1
Non-neurons	Morphogenesis of An Endothelium (GO)	0.0235569	3.7568	1
Non-neurons	Histone H3 K4 Trimethylation (GO)	0.0235569	3.7568	1
Non-neurons	Antigen Processing and Presentation of Endogenous Antigen (GO)	0.0235569	3.7568	1
Non-neurons	Histone H3 K9 Trimethylation (GO)	0.0235569	3.7568	1
Non-neurons	Dermatan Sulfate Proteoglycan Biosynthetic Process (GO)	0.0235569	3.7568	1
Non-neurons	Pos. Reg. of Glial Cell Proliferation (GO)	0.0235569	3.7568	1
Non-neurons	Liver Morphogenesis (GO)	0.0235569	3.7568	1
Non-neurons	Neg. Reg. of Cytokine Production Involved in Inflammatory Response (GO)	0.0235569	3.7568	1
Non-neurons	Pd 1 Signaling (Re)	0.0235569	3.7568	1
Non-neurons	Antimicrobial Peptides (Re)	0.0235569	3.7568	1
Non-neurons	Neg. Reg. of Ossification (GO)	0.0236407	1.8281	1
Non-neurons	Class I MHC Mediated Antigen Processing Presentation (Re)	0.0244076	1.24899	1
Non-neurons	CTL Pathway (Bi)	0.0244302	7.51191	1
Non-neurons	Cytokine Pathway (Bi)	0.0244302	7.51191	1
Non-neurons	Monocyte Pathway (Bi)	0.0244302	7.51191	1
Non-neurons	Pos. Reg. of Osteoblast Proliferation (GO)	0.0244302	7.51191	1
Non-neurons	Diet Induced Thermogenesis (GO)	0.0244302	7.51191	1
Non-neurons	Reg. of Deoxyribonuclease Activity (GO)	0.0244302	7.51191	1
Non-neurons	Granulocyte Macrophage Colony Stimulating Factor Production (GO)	0.0244302	7.51191	1
Non-neurons	Neg. Reg. of Erythrocyte Differentiation (GO)	0.0244302	7.51191	1
Non-neurons	Pos. Reg. of Monocyte Differentiation (GO)	0.0244302	7.51191	1
Non-neurons	Trophoblast Cell Migration (GO)	0.0244302	7.51191	1
Non-neurons	Interleukin 2 Secretion (GO)	0.0244302	7.51191	1
Dopa neurons	Cellular Process Involved in Reproduction in Multicellular Organism (GO)	0.0244602	1.29405	1
Dopa neurons	Monocarboxylic Acid Transport (GO)	0.0245928	1.44543	1
Non-neurons	Cytosolic Sensors of Pathogen Associated DNA (Re)	0.0247339	1.74622	1
Non-neurons	Neg. Reg. of DNA Binding (GO)	0.0248489	1.88011	1
Non-neurons	Pkmts Methylate Histone Lysines (Re)	0.0248489	1.88011	1
Non-neurons	Neg. Reg. of Protein Maturation (GO)	0.0249046	2.66171	1
Non-neurons	Purinergic Receptor Signaling Pathway (GO)	0.0249046	2.66171	1
Dopa neurons	Limbic System Development (GO)	0.0249179	1.53463	1
Non-neurons	Receptor Mediated Endocytosis (GO)	0.024947	1.2947	1
Non-neurons	CBL Pathway (Bi)	0.0249839	4.69549	1
Non-neurons	Neg. Reg. of ATPase Activity (GO)	0.0249839	4.69549	1
Non-neurons	Reg. of Endothelial Cell Development (GO)	0.0249839	4.69549	1
Non-neurons	Pos. Reg. of Macrophage Differentiation (GO)	0.0249839	4.69549	1
Non-neurons	Establishment of Blood Brain Barrier (GO)	0.0249839	4.69549	1
Non-neurons	Skeletal Muscle Acetylcholine Gated Channel Clustering (GO)	0.0249839	4.69549	1
Non-neurons	ER Associated Misfolded Protein Catabolic Process (GO)	0.0249839	4.69549	1
Non-neurons	Reg. of Protein Deubiquitination (GO)	0.0249839	4.69549	1
Non-neurons	FCGR Activation (Re)	0.0249839	4.69549	1
Dopa neurons	Reg. of Axon Guidance (GO)	0.0255213	1.98294	1
Dopa neurons	Neg. Chemotaxis (GO)	0.0255213	1.98294	1
Dopa neurons	Glandular Epithelial Cell Differentiation (GO)	0.0255213	1.98294	1
Dopa neurons	Recycling of Bile Acids and Salts (Re)	0.0256714	4.80039	1
Dopa neurons	Reg. of cGMP Mediated Signaling (GO)	0.0256714	4.80039	1
Non-neurons	Tbc Rabgaps (Re)	0.0258972	1.94703	1
Non-neurons	Reg. of Histone Modification (GO)	0.026023	1.43945	1
Non-neurons	Reg. of Ossification (GO)	0.0261728	1.38979	1
Non-neurons	ERK1 and ERK2 Cascade (GO)	0.026233	1.30387	1
Non-neurons	Reg. of Toll Like Receptor Signaling Pathway (GO)	0.0263291	1.78136	1
Dopa neurons	Dendritic Spine Development (GO)	0.0263495	1.57141	1
Non-neurons	Reg. of Dephosphorylation (GO)	0.026377	1.35067	1
Non-neurons	Pathways in Cancer (KG)	0.0265092	1.26182	1
Non-neurons	Cell Aging (GO)	0.0265122	1.52559	1
Non-neurons	NOTCH HLH Transcription Pathway (Re)	0.0265327	2.34889	1
Non-neurons	Pos. Reg. of Transcription From RNA Polymerase II Promoter in Response to Stress (GO)	0.0265327	2.34889	1
Non-neurons	Reg. of Platelet Activation (GO)	0.0265327	2.34889	1
Non-neurons	GPI Anchor Biosynthetic Process (GO)	0.0265327	2.34889	1
Non-neurons	Reg. of Vasculature Development (GO)	0.0269673	1.27848	1
Non-neurons	DNA Catabolic Process (GO)	0.026972	2.16126	1
Non-neurons	Signal Transduction in Response to DNA Damage (GO)	0.0270215	1.45083	1
Non-neurons	Reg. of Mitochondrion Organization (GO)	0.0270296	1.3708	1
Non-neurons	Cell Substrate Adhesion (GO)	0.0271251	1.25937	1
Non-neurons	Lysophospholipid Pathway (PI)	0.0271967	1.70957	1
Non-neurons	Pos. Reg. of Leukocyte Chemotaxis (GO)	0.0271967	1.70957	1
Dopa neurons	Spermatid Differentiation (GO)	0.0273405	1.5014	1
Non-neurons	Sterol Metabolic Process (GO)	0.0276586	1.61224	1
Non-neurons	Mitotic Prometaphase (Re)	0.0277186	1.35442	1
Dopa neurons	Type II Diabetes Mellitus (KG)	0.0278557	1.92195	1
Non-neurons	Signaling By RHO Gtpases (Re)	0.0278902	1.22734	1
Non-neurons	Mitotic Spindle Assembly (GO)	0.0278966	1.8248	1
Non-neurons	Mononuclear Cell Migration (GO)	0.0278966	1.8248	1
Non-neurons	Reg. of Chemotaxis (GO)	0.0280678	1.36457	1
Dopa neurons	Cellular Homeostasis (GO)	0.0280829	1.15227	1
Dopa neurons	Motor Neuron Axon Guidance (GO)	0.0282041	2.66799	1
Dopa neurons	Epithelial Cilium Movement (GO)	0.0282041	2.66799	1
Dopa neurons	Adrenergic Receptor Signaling Pathway (GO)	0.0282041	2.66799	1
Non-neurons	Vacuole Organization (GO)	0.0285386	1.38889	1
Dopa neurons	Class B 2 Secretin Family Receptors (Re)	0.0286686	1.60255	1
Dopa neurons	Leptin Pathway (Bi)	0.0286854	7.4664	1
Dopa neurons	Gamma Carboxylation Transport and Amino Terminal Cleavage of Proteins (Re)	0.0286854	7.4664	1
Dopa neurons	Pos. Reg. of Glutamate Secretion (GO)	0.0286854	7.4664	1
Dopa neurons	Atrial Cardiac Muscle Cell Membrane Repolarization (GO)	0.0286854	7.4664	1
Dopa neurons	Organic Anion Transporters (Re)	0.0286854	7.4664	1
Dopa neurons	Zinc Influx Into Cells By The SLC39 Gene Family (Re)	0.0286854	7.4664	1
Non-neurons	Pinocytosis (GO)	0.0287695	2.81791	1
Non-neurons	Lipoprotein Metabolic Process (GO)	0.0287695	2.81791	1
Non-neurons	Toll Like Receptor 9 Signaling Pathway (GO)	0.0287695	2.81791	1
Non-neurons	Reg. of Lipopolysaccharide Mediated Signaling Pathway (GO)	0.0287695	2.81791	1
Non-neurons	Cellular Response to dsRNA (GO)	0.0287695	2.81791	1
Non-neurons	Histone H4 K16 Acetylation (GO)	0.0287695	2.81791	1
Non-neurons	ZBP1 Dai Mediated Induction of Type I Ifns (Re)	0.0287695	2.81791	1
Dopa neurons	Ndkdynamin Pathway (Bi)	0.0288413	3.20114	1
Dopa neurons	Ion Channel Transport (Re)	0.0288843	1.36261	1
Non-neurons	Ajdiss 2pathway (PI)	0.02937	1.87988	1
Non-neurons	Neg. Reg. of Response to Cytokine Stimulus (GO)	0.02937	1.87988	1
Non-neurons	Cortical Cytoskeleton Organization (GO)	0.02937	1.87988	1
Dopa neurons	Sensory Perception of Mechanical Stimulus (GO)	0.0294126	1.39181	1
Dopa neurons	Heparan Sulfate Proteoglycan Metabolic Process (GO)	0.0294497	2.04617	1
Non-neurons	Metabolism of Amino Acids and Derivatives (Re)	0.0295645	1.23994	1
Dopa neurons	Import Across Plasma Membrane (GO)	0.0296842	1.47261	1
Non-neurons	Spindle Organization (GO)	0.0297135	1.38166	1
Non-neurons	Execution Phase of Apoptosis (GO)	0.0297337	1.67611	1
Non-neurons	Tissue Remodeling (GO)	0.0297805	1.43042	1
Dopa neurons	O Glycan Biosynthesis (KG)	0.0299683	2.25338	1
Dopa neurons	Thyroid Cancer (KG)	0.0299683	2.25338	1
Dopa neurons	CREB1 Phosphorylation Through NMDA Receptor Mediated Activation of RAS Signaling (Re)	0.0299683	2.25338	1
Dopa neurons	Central Nervous System Development (GO)	0.0300931	1.143	1
Dopa neurons	Calcium Dependent Cell Cell Adhesion Via Plasma Membrane Cell Adhesion Molecules (GO)	0.0301638	1.86858	1
Dopa neurons	Purine Metabolism (KG)	0.0304199	1.38191	1
Non-neurons	Pos. Reg. of Reactive Oxygen Species Metabolic Process (GO)	0.0306466	1.95195	1
Non-neurons	Defense Response to Gram Pos. Bacterium (GO)	0.0306466	1.95195	1
Non-neurons	Neg. Reg. of Lymphocyte Differentiation (GO)	0.0306466	1.95195	1
Non-neurons	Pos. Reg. of Tyrosine Phosphorylation of STAT Protein (GO)	0.0306466	1.95195	1
Non-neurons	Reg. of TP53 Activity (Re)	0.0309062	1.37466	1
Non-neurons	Placenta Development (GO)	0.0309819	1.44147	1
Non-neurons	Complement and Coagulation Cascades (KG)	0.0310484	1.77564	1
Non-neurons	Gland Development (GO)	0.0310501	1.22593	1
Dopa neurons	Transport of Inorganic Cations Anions and Amino Acids Oligopeptides (Re)	0.0311287	1.50702	1
Non-neurons	Maturation of 5 8s rRNA (GO)	0.0311691	2.41569	1
Non-neurons	Role of Phospholipids in Phagocytosis (Re)	0.0311691	2.41569	1
Non-neurons	Hdms Demethylate Histones (Re)	0.0311691	2.41569	1
Dopa neurons	Pos. Reg. of Neurological System Process (GO)	0.0312817	1.72909	1
Dopa neurons	ATP Hydrolysis Coupled Cation Transmembrane Transport (GO)	0.0312817	1.72909	1
Non-neurons	Lipoprotein Biosynthetic Process (GO)	0.0314027	1.5391	1
Non-neurons	Pos. Reg. of Response to Endoplasmic Reticulum Stress (GO)	0.0315665	2.05029	1
Non-neurons	Cytoplasmic Translational Initiation (GO)	0.0318767	2.19231	1
Non-neurons	Anoikis (GO)	0.0318767	2.19231	1
Non-neurons	PERK Regulates Gene Expression (Re)	0.0318767	2.19231	1
Non-neurons	Pos. Reg. of Smooth Muscle Cell Proliferation (GO)	0.0319598	1.56743	1
Non-neurons	B-Cell Activation Involved in Immune Response (GO)	0.0319712	1.70122	1
Non-neurons	HDR Through Homologous Recombination HRR (Re)	0.0323388	1.64544	1
Dopa neurons	Reg. of Neuron Migration (GO)	0.0323828	1.97091	1
Non-neurons	Cellular Component Disassembly (GO)	0.032482	1.19293	1
Non-neurons	Cellular Response to Heat Stress (Re)	0.0325612	1.49997	1
Dopa neurons	Response to Ammonium Ion (GO)	0.0326776	1.4397	1
Dopa neurons	Nucleobase Containing Small Molecule Biosynthetic Process (GO)	0.0329567	1.48566	1
Non-neurons	Inflam Pathway (Bi)	0.0329885	3.05232	1
Non-neurons	Neg. Reg. of Stem Cell Differentiation (GO)	0.0329885	3.05232	1
Non-neurons	Membrane Protein Intracellular Domain Proteolysis (GO)	0.0329885	3.05232	1
Non-neurons	I kappaB Phosphorylation (GO)	0.0329885	3.05232	1
Non-neurons	Pos. Reg. of Extrinsic Apoptotic Signaling Pathway Via Death Domain Receptors (GO)	0.0329885	3.05232	1
Non-neurons	Neg. Reg. of Oxidative Stress Induced Intrinsic Apoptotic Signaling Pathway (GO)	0.0329885	3.05232	1
Non-neurons	DNA Damage Response Signal Transduction Resulting in Transcription (GO)	0.0329885	3.05232	1
Non-neurons	Dosage Compensation (GO)	0.0329885	3.05232	1
Non-neurons	Neg. Reg. of Phagocytosis (GO)	0.0329885	3.05232	1
Non-neurons	Podosome Assembly (GO)	0.0329885	3.05232	1
Non-neurons	Receptor Signaling Pathway Via STAT (GO)	0.0333459	1.46849	1
Dopa neurons	Neg. Reg. of Protein Localization to Nucleus (GO)	0.0333536	2.43936	1
Dopa neurons	Muscle System Process (GO)	0.033414	1.21983	1
Non-neurons	Neg. Reg. of Transferase Activity (GO)	0.0334899	1.28046	1
Dopa neurons	Insulin Like Growth Factor Receptor Signaling Pathway (GO)	0.0337917	2.13479	1
Dopa neurons	Inwardly Rectifying Kplus Channels (Re)	0.0337917	2.13479	1
Dopa neurons	Uptake and Actions of Bacterial Toxins (Re)	0.0337917	2.13479	1
Non-neurons	Hematopoietic Cell Lineage (KG)	0.0349079	1.66661	1
Non-neurons	Neg. Reg. of Epithelial Cell Proliferation (GO)	0.035134	1.45592	1
Non-neurons	Response to Ionizing Radiation (GO)	0.0353645	1.37924	1
Non-neurons	Cytoplasmic Translation (GO)	0.0355162	1.50488	1
Non-neurons	Response to UV (GO)	0.0356375	1.41141	1
Dopa neurons	p38MAPK Events (Re)	0.0359714	3.55645	1
Dopa neurons	Guanosine Containing Compound Biosynthetic Process (GO)	0.0359714	3.55645	1
Dopa neurons	Semaphorin Plexin Signaling Pathway Involved in Neuron Projection Guidance (GO)	0.0359714	3.55645	1
Dopa neurons	Gamma Aminobutyric Acid Transport (GO)	0.0359714	3.55645	1
Dopa neurons	CDP Diacylglycerol Biosynthetic Process (GO)	0.0359714	3.55645	1
Non-neurons	DNA Damage Response Detection of DNA Damage (GO)	0.0363309	1.95773	1
Non-neurons	Aging (GO)	0.0364403	1.25627	1
Non-neurons	Fcgamma Receptor FCGR Dependent Phagocytosis (Re)	0.0364473	1.52822	1
Dopa neurons	Ammonium Transport (GO)	0.0365458	1.50159	1
Non-neurons	Reg. of Membrane Protein Ectodomain Proteolysis (GO)	0.0365991	2.50483	1
Non-neurons	Renal System Vasculature Development (GO)	0.0365991	2.50483	1
Non-neurons	Protein Containing Complex Remodeling (GO)	0.0365991	2.50483	1
Non-neurons	Cellular Protein Containing Complex Localization (GO)	0.0365991	2.50483	1
Non-neurons	IL12 2pathway (PI)	0.0366588	1.76927	1
Non-neurons	Reactive Oxygen Species Metabolic Process (GO)	0.0367796	1.3718	1
Non-neurons	Cytosolic Transport (GO)	0.0367796	1.3718	1
Dopa neurons	Intraflagellar Transport (Re)	0.0368747	1.74219	1
Non-neurons	Reg. of Response to Oxidative Stress (GO)	0.0372092	1.55643	1
Non-neurons	Tob1 Pathway (Bi)	0.0373243	3.44325	1
Non-neurons	Nkt Pathway (Bi)	0.0373243	3.44325	1
Non-neurons	Lymph Node Development (GO)	0.0373243	3.44325	1
Non-neurons	Nuclear Pore Organization (GO)	0.0373243	3.44325	1
Non-neurons	Mitotic Cell Cycle Arrest (GO)	0.0373243	3.44325	1
Non-neurons	Reg. of Lipoprotein Lipase Activity (GO)	0.0373243	3.44325	1
Non-neurons	Megakaryocyte Development (GO)	0.0373243	3.44325	1
Non-neurons	Golgi to Vacuole Transport (GO)	0.0373243	3.44325	1
Non-neurons	Response to Laminar Fluid Shear Stress (GO)	0.0373243	3.44325	1
Non-neurons	Germinal Center Formation (GO)	0.0373243	3.44325	1
Non-neurons	Coronary Vasculature Morphogenesis (GO)	0.0373243	3.44325	1
Non-neurons	Reg. of Metallopeptidase Activity (GO)	0.0373243	3.44325	1
Non-neurons	STING Mediated Induction of Host Immune Responses (Re)	0.0373243	3.44325	1
Non-neurons	Signal Regulatory Protein Family Interactions (Re)	0.0373243	3.44325	1
Non-neurons	Upa Upar Pathway (PI)	0.0374357	2.06711	1
Non-neurons	Movement in Environment of Other Organism Involved in Symbiotic Interaction (GO)	0.0374357	2.06711	1
Non-neurons	Response to Copper Ion (GO)	0.0374357	2.06711	1
Non-neurons	Neg. Reg. of Exocytosis (GO)	0.0374357	2.06711	1
Non-neurons	Neg. Reg. of Alpha Beta T-Cell Activation (GO)	0.0374357	2.06711	1
Non-neurons	G1 Pathway (Bi)	0.0377267	2.23117	1
Non-neurons	IL1R Pathway (Bi)	0.0377267	2.23117	1
Non-neurons	Il23 Pathway (PI)	0.0377267	2.23117	1
Non-neurons	Reg. of mRNA 3 End Processing (GO)	0.0377267	2.23117	1
Non-neurons	Reg. of Type I Interferon Mediated Signaling Pathway (GO)	0.0377267	2.23117	1
Non-neurons	FGFR2 Alternative Splicing (Re)	0.0377267	2.23117	1
Non-neurons	Antigen Activates B-Cell Receptor BCR Leading to Generation of Second Messengers (Re)	0.0377267	2.23117	1
Non-neurons	Renal Cell Carcinoma (KG)	0.0377299	1.59117	1
Dopa neurons	Pigment Granule Localization (GO)	0.0383923	2.26786	1
Dopa neurons	Pos. Reg. of Blood Pressure (GO)	0.0383923	2.26786	1
Dopa neurons	Reg. of Cellular Respiration (GO)	0.0383923	2.26786	1
Dopa neurons	Reg. of AMPA Receptor Activity (GO)	0.0383923	2.26786	1
Non-neurons	Cell Junction Organization (GO)	0.038834	1.26177	1
Dopa neurons	Reg. of Sodium Ion Transport (GO)	0.0391662	1.53559	1
Non-neurons	Apoptosis (KG)	0.039734	1.53588	1
Non-neurons	Non Recombinational Repair (GO)	0.039734	1.53588	1
Non-neurons	Reg. of Cell Cycle Arrest (GO)	0.0397751	1.47435	1
Non-neurons	Mitotic Metaphase and Anaphase (Re)	0.0401578	1.31793	1
Non-neurons	JAK STAT Signaling Pathway (KG)	0.040384	1.44536	1
Non-neurons	Txa2pathway (PI)	0.0404438	1.72318	1
Non-neurons	Reg. of Immunoglobulin Production (GO)	0.0404438	1.72318	1
Dopa neurons	Progesterone Mediated Oocyte Maturation (KG)	0.0404527	1.52144	1
Dopa neurons	Xenobiotic Metabolic Process (GO)	0.0404527	1.52144	1
Non-neurons	Pos. Reg. of Myeloid Cell Differentiation (GO)	0.040505	1.56705	1
Dopa neurons	Cochlea Development (GO)	0.0408486	1.8016	1
Non-neurons	Signal Transduction in Absence of Ligand (GO)	0.0409741	1.60605	1
Non-neurons	Superoxide Metabolic Process (GO)	0.0410137	1.65623	1
Non-neurons	PECAM1 Interactions (Re)	0.0411326	4.22535	1
Non-neurons	Nucleotide Like Purinergic Receptors (Re)	0.0411326	4.22535	1
Non-neurons	Neg. Reg. of Endoplasmic Reticulum Unfolded Protein Response (GO)	0.0411326	4.22535	1
Non-neurons	Reg. of Development Heterochronic (GO)	0.0411326	4.22535	1
Non-neurons	Peptidyl Methionine Modification (GO)	0.0411326	4.22535	1
Non-neurons	Pos. Reg. of Transcription From RNA Polymerase II Promoter in Response to Endoplasmic Reticulum Stress (GO)	0.0411326	4.22535	1
Non-neurons	Type I Interferon Biosynthetic Process (GO)	0.0411326	4.22535	1
Non-neurons	Reg. of Fc Receptor Mediated Stimulatory Signaling Pathway (GO)	0.0411326	4.22535	1
Non-neurons	Response to Interleukin 18 (GO)	0.0411326	4.22535	1
Non-neurons	Neg. Reg. of Long Term Synaptic Potentiation (GO)	0.0411326	4.22535	1
Non-neurons	Neg. Reg. of Autophagosome Assembly (GO)	0.0411326	4.22535	1
Non-neurons	Reg. of RNA Polymerase II Regulatory Region Sequence Specific DNA Binding (GO)	0.0411326	4.22535	1
Non-neurons	Neg. Reg. of Extracellular Matrix Organization (GO)	0.0411326	4.22535	1
Non-neurons	Reg. of DNA Catabolic Process (GO)	0.0411326	4.22535	1
Non-neurons	Interleukin 6 Signaling (Re)	0.0411326	4.22535	1
Non-neurons	Dissolution of Fibrin Clot (Re)	0.0411326	4.22535	1
Dopa neurons	Pos. Reg. of Reproductive Process (GO)	0.041135	1.678	1
Dopa neurons	Bile Acid and Bile Salt Metabolism (Re)	0.0411896	1.95693	1
Dopa neurons	Phenol Containing Compound Biosynthetic Process (GO)	0.0411896	1.95693	1
Dopa neurons	Central Nervous System Neuron Axonogenesis (GO)	0.0411896	1.95693	1
Non-neurons	DNA Replication Independent Nucleosome Organization (GO)	0.0412314	1.87941	1
Non-neurons	p38MAPK Cascade (GO)	0.0412314	1.87941	1
Dopa neurons	Drug Catabolic Process (GO)	0.0417154	1.50813	1
Dopa neurons	Reg. of Cell Development (GO)	0.0417468	1.13552	1
Dopa neurons	Localization Within Membrane (GO)	0.0419288	1.35748	1
Non-neurons	Golgi Vesicle Transport (GO)	0.0422069	1.21817	1
Non-neurons	G Protein Coupled Purinergic Nucleotide Receptor Signaling Pathway (GO)	0.0426635	6.57204	1
Non-neurons	Neg. Reg. of Stem Cell Proliferation (GO)	0.0426635	6.57204	1
Non-neurons	Response to Selenium Ion (GO)	0.0426635	6.57204	1
Non-neurons	Zymogen Inhibition (GO)	0.0426635	6.57204	1
Non-neurons	HDL Remodeling (Re)	0.0426635	6.57204	1
Dopa neurons	Sensory Perception of Temperature Stimulus (GO)	0.0428135	2.4898	1
Dopa neurons	Nucleotide Transport (GO)	0.0428135	2.4898	1
Dopa neurons	Left Right Pattern Formation (GO)	0.0428135	2.4898	1
Non-neurons	Toll Endogenous Pathway (PI)	0.0429192	2.62972	1
Non-neurons	Error Free Translesion Synthesis (GO)	0.0429192	2.62972	1
Non-neurons	Pos. Reg. of Antigen Receptor Mediated Signaling Pathway (GO)	0.0429192	2.62972	1
Non-neurons	Myelin Assembly (GO)	0.0429192	2.62972	1
Non-neurons	Response to Mitochondrial Depolarisation (GO)	0.0429192	2.62972	1
Non-neurons	Phospholipid Catabolic Process (GO)	0.0431571	1.9646	1
Non-neurons	HSF1 Dependent Transactivation (Re)	0.0431571	1.9646	1
Dopa neurons	Amino Acid Transport Across The Plasma Membrane (Re)	0.0432829	2.13446	1
Dopa neurons	Glucagon Type Ligand Receptors (Re)	0.0432829	2.13446	1
Dopa neurons	Response to Acetylcholine (GO)	0.0432829	2.13446	1
Dopa neurons	Downstream Signaling of Activated FGFR1 (Re)	0.0432829	2.13446	1
Non-neurons	Neg. Reg. of Muscle Cell Differentiation (GO)	0.0433433	1.76214	1
Non-neurons	Neg. Reg. of Intrinsic Apoptotic Signaling Pathway (GO)	0.0434732	1.47781	1
Non-neurons	Connective Tissue Development (GO)	0.0436833	1.26842	1
Non-neurons	Maintenance of Location (GO)	0.0439076	1.24036	1
Non-neurons	Reg. of Body Fluid Levels (GO)	0.0439259	1.19745	1
Non-neurons	Reg. of Coagulation (GO)	0.0440897	1.5794	1
Dopa neurons	Srcrptp Pathway (Bi)	0.0442907	4.26633	1
Dopa neurons	Agpcr Pathway (Bi)	0.0442907	4.26633	1
Dopa neurons	Ptc1 Pathway (Bi)	0.0442907	4.26633	1
Dopa neurons	Adenohypophysis Development (GO)	0.0442907	4.26633	1
Dopa neurons	Axonal Transport of Mitochondrion (GO)	0.0442907	4.26633	1
Dopa neurons	Photoreceptor Cell Outer Segment Organization (GO)	0.0442907	4.26633	1
Dopa neurons	Determination of Dorsal Ventral Asymmetry (GO)	0.0442907	4.26633	1
Dopa neurons	Reg. of Neurotrophin TRK Receptor Signaling Pathway (GO)	0.0442907	4.26633	1
Dopa neurons	Reg. of Dopamine Receptor Signaling Pathway (GO)	0.0442907	4.26633	1
Dopa neurons	Reg. of Steroid Hormone Biosynthetic Process (GO)	0.0442907	4.26633	1
Dopa neurons	Retrograde Trans Synaptic Signaling (GO)	0.0442907	4.26633	1
Dopa neurons	Reg. of Postsynaptic Cytosolic Calcium Ion Concentration (GO)	0.0442907	4.26633	1
Dopa neurons	Synthesis of Pyrophosphates in The Cytosol (Re)	0.0442907	4.26633	1
Dopa neurons	Role of Second Messengers in Netrin 1 Signaling (Re)	0.0442907	4.26633	1
Dopa neurons	FGFRL1 Modulation of FGFR1 Signaling (Re)	0.0442907	4.26633	1
Non-neurons	FAS Pathway (Bi)	0.0444896	2.08765	1
Non-neurons	Reg. of Oligodendrocyte Differentiation (GO)	0.0444896	2.08765	1
Non-neurons	Neg. Reg. of Macroautophagy (GO)	0.0444896	2.08765	1
Non-neurons	mRNA Cis Splicing Via Spliceosome (GO)	0.0444896	2.08765	1
Non-neurons	Reg. of ERAD Pathway (GO)	0.0444896	2.08765	1
Non-neurons	Vdr Pathway (Bi)	0.0447185	2.2812	1
Non-neurons	Integrin Cs Pathway (PI)	0.0447185	2.2812	1
Non-neurons	Vascular Smooth Muscle Cell Differentiation (GO)	0.0447185	2.2812	1
Non-neurons	Peptidyl Glutamic Acid Modification (GO)	0.0447185	2.2812	1
Non-neurons	Reg. of Establishment or Maintenance of Cell Polarity (GO)	0.0447185	2.2812	1
Non-neurons	Neg. Reg. of Antigen Receptor Mediated Signaling Pathway (GO)	0.0447185	2.2812	1
Non-neurons	Reg. of Endoplasmic Reticulum Unfolded Protein Response (GO)	0.0447185	2.2812	1
Non-neurons	Regulatory T-Cell Differentiation (GO)	0.0447185	2.2812	1
Non-neurons	Pos. Reg. of Posttranscriptional Gene Silencing (GO)	0.0447185	2.2812	1
Non-neurons	Abortive Elongation of HIV 1 Transcript in The Absence of Tat (Re)	0.0447185	2.2812	1
Dopa neurons	Reg. of Meiotic Cell Cycle (GO)	0.0447388	1.88853	1
Dopa neurons	Sodium Ion Homeostasis (GO)	0.0447388	1.88853	1
Non-neurons	Blastocyst Development (GO)	0.0449037	1.49863	1
Dopa neurons	Glycosphingolipid Biosynthesis Ganglio Series (KG)	0.0458885	2.93389	1
Dopa neurons	Stathmin Pathway (Bi)	0.0458885	2.93389	1
Dopa neurons	RAP1 Signalling (Re)	0.0458885	2.93389	1
Dopa neurons	Pos. Reg. of Lyase Activity (GO)	0.0458885	2.93389	1
Dopa neurons	G Protein Coupled Glutamate Receptor Signaling Pathway (GO)	0.0458885	2.93389	1
Dopa neurons	Neuron Cell Cell Adhesion (GO)	0.0458885	2.93389	1
Dopa neurons	piRNA Metabolic Process (GO)	0.0458885	2.93389	1
Dopa neurons	Reg. of Delayed Rectifier Potassium Channel Activity (GO)	0.0458885	2.93389	1
Dopa neurons	Response to Epinephrine (GO)	0.0458885	2.93389	1
Dopa neurons	Midbrain Dopaminergic Neuron Differentiation (GO)	0.0458885	2.93389	1
Dopa neurons	Wnt5a Dependent Internalization of FZD4 (Re)	0.0458885	2.93389	1
Non-neurons	Muscle Cell Proliferation (GO)	0.0461359	1.31763	1
Non-neurons	TCPTP Pathway (PI)	0.0462386	1.81227	1
Non-neurons	Interleukin 3 Interleukin 5 and Gm Csf Signaling (Re)	0.0462386	1.81227	1
Non-neurons	Intra Golgi Traffic (Re)	0.0462386	1.81227	1
Non-neurons	Endomembrane System Organization (GO)	0.0463165	1.19627	1
Non-neurons	Erythrocyte Homeostasis (GO)	0.0463961	1.43428	1
Non-neurons	Cell Cycle (KG)	0.0464164	1.39145	1
Non-neurons	Extracellular Matrix Organization (Re)	0.0470046	1.2446	1
Dopa neurons	Reg. of Blood Pressure (GO)	0.0471123	1.35867	1
Non-neurons	VEGFR1 2 Pathway (PI)	0.047252	1.5548	1
Dopa neurons	Response to Drug (GO)	0.0477189	1.12708	1
Non-neurons	PTP1B Pathway (PI)	0.0477583	1.71376	1
Non-neurons	Histone H3 K4 Methylation (GO)	0.0477583	1.71376	1
Non-neurons	Multicellular Organismal Homeostasis (GO)	0.047785	1.19332	1
Non-neurons	TP53 Regulates Transcription of DNA Repair Genes (Re)	0.0479834	1.59393	1
Dopa neurons	Nucleoside Diphosphate Metabolic Process (GO)	0.0480033	2.02776	1
Dopa neurons	PLK1 Pathway (PI)	0.0481785	1.8299	1
Non-neurons	NOTCH Pathway (PI)	0.0482277	1.64483	1
Non-neurons	Nephron Development (GO)	0.0483764	1.38224	1
Dopa neurons	Netrin 1 Signaling (Re)	0.0487076	1.68576	1
Non-neurons	Hippo Signaling (GO)	0.0489966	1.87917	1
Non-neurons	Acute Inflammatory Response (GO)	0.0490891	1.50433	1
Dopa neurons	Morphogenesis of An Epithelial Fold (GO)	0.0494082	2.28657	1
Dopa neurons	Neg. Reg. of Amine Transport (GO)	0.0494082	2.28657	1
Dopa neurons	Reg. of Microtubule Based Movement (GO)	0.0494082	2.28657	1
Dopa neurons	Mitochondrial Fusion (GO)	0.0494082	2.28657	1
Dopa neurons	Neuromuscular Synaptic Transmission (GO)	0.0494082	2.28657	1
Non-neurons	Ameboidal Type Cell Migration (GO)	0.0495211	1.20618	1
Non-neurons	Embryo Development (GO)	0.0500704	1.12852	1
Non-neurons	Il7 Pathway (Bi)	0.0501819	2.81718	1
Non-neurons	TGF Beta Receptor Signaling in EMT Epithelial to Mesenchymal Transition (Re)	0.0501819	2.81718	1
Non-neurons	Neg. Reg. of Tissue Remodeling (GO)	0.0501819	2.81718	1
Non-neurons	Neg. Reg. of Lipid Storage (GO)	0.0501819	2.81718	1
Non-neurons	Heat Generation (GO)	0.0501819	2.81718	1
Non-neurons	Collagen Metabolic Process (GO)	0.0501819	2.81718	1
Non-neurons	Nitric Oxide Synthase Biosynthetic Process (GO)	0.0501819	2.81718	1
Non-neurons	Chaperone Mediated Autophagy (GO)	0.0501819	2.81718	1
Non-neurons	Pos. Reg. of Macrophage Migration (GO)	0.0501819	2.81718	1
Non-neurons	Reg. of Cell Matrix Adhesion (GO)	0.0509412	1.41074	1
Non-neurons	Neg. Reg. of Peptidyl Tyrosine Phosphorylation (GO)	0.0513268	1.75409	1
Non-neurons	Pos. Reg. of Reactive Oxygen Species Biosynthetic Process (GO)	0.0513268	1.75409	1
Non-neurons	Lymphocyte Costimulation (GO)	0.0513268	1.75409	1
Non-neurons	Protein Destabilization (GO)	0.0513268	1.75409	1
Non-neurons	Signaling By NOTCH2 (Re)	0.0513873	1.97289	1
Non-neurons	Response to Fluid Shear Stress (GO)	0.0513873	1.97289	1
Non-neurons	RNA Phosphodiester Bond Hydrolysis Endonucleolytic (GO)	0.0515404	1.56667	1
Non-neurons	Protein Kinase B Signaling (GO)	0.0516411	1.2693	1
Dopa neurons	Pos. Reg. of Hormone Secretion (GO)	0.0520179	1.41619	1
Non-neurons	Substrate Adhesion Dependent Cell Spreading (GO)	0.0520222	1.48613	1
Non-neurons	Sumoylation of Chromatin Organization Proteins (Re)	0.0522035	1.61126	1
Non-neurons	rRNA Modification in The Nucleus and Cytosol (Re)	0.0522035	1.61126	1
Non-neurons	FOXO Mediated Transcription (Re)	0.0522035	1.61126	1
Non-neurons	Pos. Reg. of Response to Cytokine Stimulus (GO)	0.0522361	1.67075	1
Non-neurons	Glycerolipid Catabolic Process (GO)	0.0522361	1.67075	1
Non-neurons	Cell Cycle Arrest (GO)	0.0525089	1.25861	1
Dopa neurons	Pos. Reg. of Synaptic Transmission Glutamatergic (GO)	0.0525415	1.94047	1
Dopa neurons	Monosaccharide Catabolic Process (GO)	0.0525415	1.94047	1
Dopa neurons	Neuronal Action Potential (GO)	0.0525415	1.94047	1
Dopa neurons	CYP2E1 Reactions (Re)	0.0526493	6.39883	1
Non-neurons	Reg. of DNA Templated Transcription in Response to Stress (GO)	0.0529166	1.38086	1
Non-neurons	IL12 STAT4 Pathway (PI)	0.0530028	2.11348	1
Non-neurons	Generation of Second Messenger Molecules (Re)	0.0530028	2.11348	1
Non-neurons	Neg. Reg. of Reactive Oxygen Species Biosynthetic Process (GO)	0.0530028	2.11348	1
Non-neurons	Resolution of D Loop Structures Through Synthesis Dependent Strand Annealing SDSA (Re)	0.0530028	2.11348	1
Non-neurons	Microautophagy (Re)	0.0530028	2.11348	1
Non-neurons	Caspase Pathway (Bi)	0.053092	2.34799	1
Non-neurons	Neg. Reg. of Protein Acetylation (GO)	0.053092	2.34799	1
Non-neurons	Pos. Reg. of Cell Substrate Adhesion (GO)	0.0532474	1.3998	1
Dopa neurons	Reg. of Small Molecule Metabolic Process (GO)	0.0532615	1.21848	1
Dopa neurons	Divalent Inorganic Cation Homeostasis (GO)	0.0532848	1.18648	1
Dopa neurons	Signaling By Insulin Receptor (Re)	0.0545393	1.52556	1
Dopa neurons	Aquaporin Mediated Transport (Re)	0.0547188	1.73463	1
Non-neurons	P38 Alpha Beta Downstream Pathway (PI)	0.0549175	1.80688	1
Non-neurons	Pos. Reg. of Glial Cell Differentiation (GO)	0.0549175	1.80688	1
Non-neurons	Embryo Implantation (GO)	0.0549175	1.80688	1
Non-neurons	Megakaryocyte Differentiation (GO)	0.0551359	1.54159	1
Dopa neurons	Barrestin Src Pathway (Bi)	0.0552352	2.56053	1
Dopa neurons	Pos. Reg. of Meiotic Cell Cycle (GO)	0.0552352	2.56053	1
Dopa neurons	Reg. of Feeding Behavior (GO)	0.0552352	2.56053	1
Dopa neurons	Catecholamine Biosynthetic Process (GO)	0.0552352	2.56053	1
Dopa neurons	Activation of Protein Kinase a Activity (GO)	0.0552352	2.56053	1
Dopa neurons	Type B Pancreatic Cell Proliferation (GO)	0.0552352	2.56053	1
Dopa neurons	Cytosolic tRNA Aminoacylation (Re)	0.0556842	2.13414	1
Dopa neurons	Respiratory System Process (GO)	0.0556842	2.13414	1
Dopa neurons	Protein Kinase C Signaling (GO)	0.0556842	2.13414	1
Dopa neurons	Glycosphingolipid Biosynthetic Process (GO)	0.0556842	2.13414	1
Dopa neurons	Sleep (GO)	0.0556842	2.13414	1
Dopa neurons	Nitric Oxide Mediated Signal Transduction (GO)	0.0556842	2.13414	1
Dopa neurons	Carbohydrate Metabolic Process (GO)	0.0557868	1.16204	1
Dopa neurons	Response to Activity (GO)	0.055915	1.60152	1
Dopa neurons	Mitochondrial Transmembrane Transport (GO)	0.0559239	1.44343	1
Dopa neurons	Organophosphate Biosynthetic Process (GO)	0.0559364	1.15916	1
Non-neurons	Neg. Reg. of Chromosome Organization (GO)	0.0563986	1.34888	1
Non-neurons	Cellular Response to Antibiotic (GO)	0.0563986	1.34888	1
Non-neurons	TNF Pathway (PI)	0.0564743	1.70318	1
Non-neurons	Pos. Reg. of Cell Matrix Adhesion (GO)	0.0564743	1.70318	1
Non-neurons	Cell Differentiation Involved in Kidney Development (GO)	0.0564743	1.70318	1
Non-neurons	RIG I Like Receptor Signaling Pathway (KG)	0.0567623	1.63226	1
Non-neurons	Demethylation (GO)	0.0567623	1.63226	1
Non-neurons	Sister Chromatid Cohesion (GO)	0.0567623	1.63226	1
Dopa neurons	Forelimb Morphogenesis (GO)	0.0568929	1.86772	1
Dopa neurons	Reg. of Sensory Perception (GO)	0.0568929	1.86772	1
Dopa neurons	Lipid Modification (GO)	0.0571069	1.25871	1
Non-neurons	Diseases of Signal Transduction (Re)	0.0572966	1.19116	1
Non-neurons	Antigen Processing and Presentation (GO)	0.0578053	1.27004	1
Dopa neurons	G Alpha Z Signalling Events (Re)	0.0578186	1.6954	1
Dopa neurons	Presynapse Organization (GO)	0.0578186	1.6954	1
Non-neurons	Reg. of DNA Binding (GO)	0.0579184	1.37936	1
Non-neurons	Cell Cycle G1 S Phase Transition (GO)	0.0580157	1.23744	1
Non-neurons	Il10 Pathway (Bi)	0.0582982	3.12979	1
Non-neurons	Trafficking and Processing of Endosomal TLR (Re)	0.0582982	3.12979	1
Non-neurons	Chemokine Receptors Bind Chemokines (Re)	0.0582982	3.12979	1
Non-neurons	Response to Protozoan (GO)	0.0582982	3.12979	1
Non-neurons	Reg. of Lymphocyte Chemotaxis (GO)	0.0582982	3.12979	1
Non-neurons	Glial Cell Fate Commitment (GO)	0.0582982	3.12979	1
Non-neurons	Reg. of Histone H4 Acetylation (GO)	0.0582982	3.12979	1
Non-neurons	Pos. Reg. of Myelination (GO)	0.0582982	3.12979	1
Non-neurons	PRC2 Pathway (Bi)	0.0582982	3.12979	1
Non-neurons	Neutrophil Homeostasis (GO)	0.0582982	3.12979	1
Non-neurons	T-Cell Chemotaxis (GO)	0.0582982	3.12979	1
Non-neurons	Nucleosome Positioning (GO)	0.0582982	3.12979	1
Non-neurons	Antibacterial Humoral Response (GO)	0.0582982	3.12979	1
Non-neurons	Neg. Reg. of Interferon Beta Production (GO)	0.0582982	3.12979	1
Non-neurons	Chemokine Biosynthetic Process (GO)	0.0582982	3.12979	1
Non-neurons	Hif2pathway (PI)	0.0583631	1.87894	1
Non-neurons	Humoral Immune Response Mediated By Circulating Immunoglobulin (GO)	0.0583631	1.87894	1
Non-neurons	Mismatch Repair (GO)	0.0583631	1.87894	1
Non-neurons	Peptidyl Asparagine Modification (GO)	0.0583631	1.87894	1
Non-neurons	Neg. Regulators of DDX58 IFIH1 Signaling (Re)	0.0583631	1.87894	1
Dopa neurons	Ionotropic Activity of Kainate Receptors (Re)	0.0587062	3.20021	1
Dopa neurons	Bundle of His Cell to Purkinje Myocyte Communication (GO)	0.0587062	3.20021	1
Dopa neurons	Reg. of Mesoderm Development (GO)	0.0587062	3.20021	1
Dopa neurons	Vitamin D Metabolic Process (GO)	0.0587062	3.20021	1
Dopa neurons	Collecting Duct Development (GO)	0.0587062	3.20021	1
Dopa neurons	Neurotransmitter Gated Ion Channel Clustering (GO)	0.0587062	3.20021	1
Dopa neurons	Trans Synaptic Signaling Modulating Synaptic Transmission (GO)	0.0587062	3.20021	1
Dopa neurons	Camk IV Mediated Phosphorylation of CREB (Re)	0.0587062	3.20021	1
Dopa neurons	Mitochondrial Iron Sulfur Cluster Biogenesis (Re)	0.0587062	3.20021	1
Non-neurons	Pancreatic Cancer (KG)	0.0587633	1.51844	1
Non-neurons	Pre NOTCH Expression and Processing (Re)	0.0587633	1.51844	1
Non-neurons	TGF Beta Signaling Pathway (KG)	0.0602576	1.4728	1
Non-neurons	Nucleus Organization (GO)	0.0602801	1.36981	1
Dopa neurons	Insulin Secretion Involved in Cellular Response to Glucose Stimulus (GO)	0.0603634	1.55706	1
Dopa neurons	Developmental Maturation (GO)	0.0605619	1.23937	1
Dopa neurons	Rhythmic Behavior (GO)	0.0610573	1.80617	1
Dopa neurons	O Glycosylation of TSR Domain Containing Proteins (Re)	0.0610573	1.80617	1
Non-neurons	Macromolecule Deacylation (GO)	0.0611389	1.41041	1
Non-neurons	Syndecan 4 Pathway (PI)	0.0613584	1.98308	1
Non-neurons	Establishment of Epithelial Cell Polarity (GO)	0.0613584	1.98308	1
Non-neurons	Reg. of Keratinocyte Differentiation (GO)	0.0613584	1.98308	1
Non-neurons	Foam Cell Differentiation (GO)	0.0613584	1.98308	1
Non-neurons	RUNX2 Regulates Bone Development (Re)	0.0613584	1.98308	1
Dopa neurons	Neg. Reg. of Embryonic Development (GO)	0.0616305	2.0156	1
Dopa neurons	Retrograde Transport Endosome to Plasma Membrane (GO)	0.0616305	2.0156	1
Dopa neurons	Reg. of Synaptic Vesicle Recycling (GO)	0.0616305	2.0156	1
Dopa neurons	Adrenaline Noradrenaline Inhibits Insulin Secretion (Re)	0.0616305	2.0156	1
Non-neurons	Trans Golgi Network Vesicle Budding (Re)	0.0624167	1.49701	1
Non-neurons	Cellular Response to Ionizing Radiation (GO)	0.0624167	1.49701	1
Non-neurons	Reg. of Organelle Assembly (GO)	0.0631237	1.27529	1
Non-neurons	Nuclear Envelope Reassembly (GO)	0.0631358	2.44159	1
Non-neurons	Dendritic Cell Migration (GO)	0.0631358	2.44159	1
Non-neurons	Reg. of Cholesterol Efflux (GO)	0.0631358	2.44159	1
Non-neurons	Ectoderm Development (GO)	0.0631358	2.44159	1
Non-neurons	Neg. Reg. of Oxidoreductase Activity (GO)	0.0631358	2.44159	1
Non-neurons	Neg. Reg. of NIK NF kappaB Signaling (GO)	0.0631358	2.44159	1
Non-neurons	Activated TAK1 Mediates P38 MAPK Activation (Re)	0.0633295	2.14675	1
Non-neurons	DNA Dealkylation (GO)	0.0633295	2.14675	1
Non-neurons	Genetic Imprinting (GO)	0.0633295	2.14675	1
Non-neurons	Embryonic Placenta Morphogenesis (GO)	0.0633295	2.14675	1
Dopa neurons	Protein Localization (Re)	0.0635494	1.29459	1
Non-neurons	Antiviral Mechanism By IFN Stimulated Genes (Re)	0.0635745	1.4556	1
Non-neurons	Transcriptional Reg. By TP53 (Re)	0.0637605	1.18834	1
Non-neurons	Maintenance of Protein Location (GO)	0.0639211	1.39835	1
Non-neurons	Reg. of DNA Recombination (GO)	0.064013	1.42369	1
Dopa neurons	Gap Junction (KG)	0.0642107	1.44488	1
Non-neurons	Pos. Reg. of DNA Biosynthetic Process (GO)	0.0643506	1.5273	1
Non-neurons	Neg. Reg. of Cellular Amide Metabolic Process (GO)	0.0646611	1.32019	1
Dopa neurons	Pos. Reg. of Muscle Contraction (GO)	0.0650378	1.75341	1
Dopa neurons	Autonomic Nervous System Development (GO)	0.0650378	1.75341	1
Dopa neurons	Glucagon Like Peptide 1 GLP1 Regulates Insulin Secretion (Re)	0.0650378	1.75341	1
Non-neurons	Response to Organic Cyclic Compound (GO)	0.0650803	1.12113	1
Non-neurons	p38MAPK Pathway (Bi)	0.0653723	1.80064	1
Non-neurons	FOXM1 Pathway (PI)	0.0653723	1.80064	1
Non-neurons	Cytokinetic Process (GO)	0.0653723	1.80064	1
Non-neurons	DAP12 Interactions (Re)	0.0653723	1.80064	1
Dopa neurons	Reg. of Intracellular Transport (GO)	0.0656174	1.17188	1
Dopa neurons	Cellular Ketone Metabolic Process (GO)	0.0657065	1.2826	1
Non-neurons	Nuclear Transcribed mRNA Catabolic Process Deadenylation Dependent Decay (GO)	0.0660907	1.4771	1
Dopa neurons	Sperm Motility (GO)	0.066457	1.60126	1
Dopa neurons	Pos. Reg. of Blood Circulation (GO)	0.066457	1.60126	1
Dopa neurons	Glutamine Family Amino Acid Metabolic Process (GO)	0.0665286	1.50274	1
Dopa neurons	Reg. of Cardiac Muscle Contraction (GO)	0.0665286	1.50274	1
Non-neurons	Neg. Reg. of Oligodendrocyte Differentiation (GO)	0.0667494	3.75533	1
Non-neurons	Natural Killer Cell Activation Involved in Immune Response (GO)	0.0667494	3.75533	1
Non-neurons	DNA Replication Dependent Nucleosome Organization (GO)	0.0667494	3.75533	1
Non-neurons	Immunological Synapse Formation (GO)	0.0667494	3.75533	1
Non-neurons	Complement Receptor Mediated Signaling Pathway (GO)	0.0667494	3.75533	1
Non-neurons	Posttranslational Protein Targeting to Endoplasmic Reticulum Membrane (GO)	0.0667494	3.75533	1
Non-neurons	Serine Family Amino Acid Catabolic Process (GO)	0.0667494	3.75533	1
Non-neurons	Bleb Assembly (GO)	0.0667494	3.75533	1
Non-neurons	Interleukin 8 Biosynthetic Process (GO)	0.0667494	3.75533	1
Non-neurons	Macropinocytosis (GO)	0.0667494	3.75533	1
Non-neurons	MHC Class II Biosynthetic Process (GO)	0.0667494	3.75533	1
Non-neurons	Cellular Hyperosmotic Response (GO)	0.0667494	3.75533	1
Non-neurons	Reg. of Neuromuscular Junction Development (GO)	0.0667494	3.75533	1
Non-neurons	ESCRT Complex Disassembly (GO)	0.0667494	3.75533	1
Non-neurons	Pos. Reg. of Double Strand Break Repair Via Homologous Recombination (GO)	0.0667494	3.75533	1
Non-neurons	Biotin Transport and Metabolism (Re)	0.0667494	3.75533	1
Non-neurons	Sumoylation of Immune Response Proteins (Re)	0.0667494	3.75533	1
Non-neurons	IRAK4 Deficiency Tlr2 4 (Re)	0.0667494	3.75533	1
Non-neurons	Sphingolipid De Novo Biosynthesis (Re)	0.0668856	1.69122	1
Non-neurons	Reg. of Erythrocyte Differentiation (GO)	0.0668856	1.69122	1
Non-neurons	Natural Killer Cell Mediated Immunity (GO)	0.0668856	1.69122	1
Non-neurons	TP53 Regulates Transcription of Cell Death Genes (Re)	0.0668856	1.69122	1
Dopa neurons	Glycogen Metabolism (Re)	0.0672493	1.92077	1
Non-neurons	Signaling By Nuclear Receptors (Re)	0.0682344	1.24439	1
Dopa neurons	Peptidyl Threonine Modification (GO)	0.0682942	1.35757	1
Non-neurons	Pos. Reg. of Cellular Amide Metabolic Process (GO)	0.0683656	1.32371	1
Non-neurons	Reg. of Proteasomal Protein Catabolic Process (GO)	0.0686048	1.27146	1
Non-neurons	Reg. of Cell Cycle Process (GO)	0.068617	1.12681	1
Dopa neurons	Neg. Reg. of Neuron Apoptotic Process (GO)	0.068945	1.30601	1
Dopa neurons	Ion Transport By P Type Atpases (Re)	0.0691253	1.57586	1
Dopa neurons	Cell Migration Involved in Sprouting Angiogenesis (GO)	0.0691253	1.57586	1
Non-neurons	Epithelial Cell Proliferation (GO)	0.0693478	1.19246	1
Non-neurons	Protein Localization to Organelle (GO)	0.0696028	1.11313	1
Non-neurons	Lung Epithelium Development (GO)	0.0697153	1.8787	1
Non-neurons	Pos. Reg. of Substrate Adhesion Dependent Cell Spreading (GO)	0.0697153	1.8787	1
Non-neurons	Reg. of Astrocyte Differentiation (GO)	0.0697153	1.8787	1
Non-neurons	Intra Golgi Vesicle Mediated Transport (GO)	0.0697153	1.8787	1
Non-neurons	Reg. of Mast Cell Activation (GO)	0.0697153	1.8787	1
Non-neurons	Acute Phase Response (GO)	0.0697153	1.8787	1
Non-neurons	Mononuclear Cell Differentiation (GO)	0.0697153	1.8787	1
Non-neurons	Epithelial Cell Apoptotic Process (GO)	0.0702588	1.42434	1
Non-neurons	Extracellular Matrix Disassembly (GO)	0.070514	1.5378	1
Dopa neurons	Eph Ephrin Signaling (Re)	0.0711323	1.39663	1
Dopa neurons	Pyrimidine Containing Compound Biosynthetic Process (GO)	0.0716936	1.55277	1
Dopa neurons	Phenylalanine Metabolism (KG)	0.0717242	2.66681	1
Dopa neurons	Lpa4 Pathway (PI)	0.0717242	2.66681	1
Dopa neurons	TCR RAS Pathway (PI)	0.0717242	2.66681	1
Dopa neurons	Retrograde Neurotrophin Signalling (Re)	0.0717242	2.66681	1
Dopa neurons	Cyclic Nucleotide Catabolic Process (GO)	0.0717242	2.66681	1
Dopa neurons	Retinal Metabolic Process (GO)	0.0717242	2.66681	1
Dopa neurons	Behavioral Response to Cocaine (GO)	0.0717242	2.66681	1
Dopa neurons	Epoxygenase P450 Pathway (GO)	0.0717242	2.66681	1
Dopa neurons	Reg. of Ketone Biosynthetic Process (GO)	0.0717242	2.66681	1
Dopa neurons	Naplus Cl Dependent Neurotransmitter Transporters (Re)	0.0717242	2.66681	1
Dopa neurons	Glutamate and Glutamine Metabolism (Re)	0.0717242	2.66681	1
Dopa neurons	Reg. of Oxidative Phosphorylation (GO)	0.0720323	2.13382	1
Dopa neurons	Eating Behavior (GO)	0.0720323	2.13382	1
Dopa neurons	Vesicle Fusion to Plasma Membrane (GO)	0.0720323	2.13382	1
Dopa neurons	Response to Muscle Activity (GO)	0.0720323	2.13382	1
Dopa neurons	Mitochondrial Genome Maintenance (GO)	0.0720323	2.13382	1
Dopa neurons	Long Chain Fatty Acid Biosynthetic Process (GO)	0.0720323	2.13382	1
Non-neurons	Reg. of Protein Maturation (GO)	0.0720967	1.58259	1
Non-neurons	Response to Gamma Radiation (GO)	0.0720967	1.58259	1
Non-neurons	Intracellular Estrogen Receptor Signaling Pathway (GO)	0.0720967	1.58259	1
Non-neurons	Nuclear Envelope Breakdown (Re)	0.0720967	1.58259	1
Non-neurons	Epithelial Cell Differentiation (GO)	0.0722756	1.15244	1
Non-neurons	Reg. of Autophagy of Mitochondrion (GO)	0.0723795	1.73438	1
Non-neurons	HDR Through Single Strand Annealing SSA (Re)	0.0723795	1.73438	1
Non-neurons	RUNX1 Interacts With CO Factors Whose Precise Effect On RUNX1 Targets Is NOT Known (Re)	0.0723795	1.73438	1
Dopa neurons	DAG and IP3 Signaling (Re)	0.0724684	1.66768	1
Dopa neurons	Mitochondrion Localization (GO)	0.0724684	1.66768	1
Dopa neurons	Tyrosine Metabolism (KG)	0.0725506	1.84319	1
Dopa neurons	Hnf3b Pathway (PI)	0.0725506	1.84319	1
Dopa neurons	Activation of Kainate Receptors Upon Glutamate Binding (Re)	0.0725506	1.84319	1
Dopa neurons	Response to Glucagon (GO)	0.0725506	1.84319	1
Dopa neurons	Response to Morphine (GO)	0.0725506	1.84319	1
Non-neurons	Lysine Degradation (KG)	0.0728864	1.64423	1
Non-neurons	Fanconi Pathway (PI)	0.0728864	1.64423	1
Non-neurons	ER Nucleus Signaling Pathway (GO)	0.0728864	1.64423	1
Non-neurons	Neg. Reg. of GTPase Activity (GO)	0.0728864	1.64423	1
Non-neurons	S Phase (Re)	0.073015	1.28276	1
Non-neurons	Gene Silencing By RNA (Re)	0.0731904	1.38549	1
Non-neurons	Integrin Cell Surface Interactions (Re)	0.0734818	1.44127	1
Non-neurons	Visual Phototransduction (Re)	0.0734818	1.44127	1
Non-neurons	Raccycd Pathway (Bi)	0.0735109	1.99588	1
Non-neurons	Pos. Reg. of ERBB Signaling Pathway (GO)	0.0735109	1.99588	1
Non-neurons	Neuron Death in Response to Oxidative Stress (GO)	0.0735109	1.99588	1
Non-neurons	Viral RNA Genome Replication (GO)	0.0735109	1.99588	1
Non-neurons	Metalloprotease Dubs (Re)	0.0735109	1.99588	1
Dopa neurons	Secreted Factors (Na)	0.0735341	1.24143	1
Non-neurons	Dc Pathway (Bi)	0.0735939	5.63242	1
Non-neurons	Il5 Pathway (Bi)	0.0735939	5.63242	1
Non-neurons	Reg. of Humoral Immune Response Mediated By Circulating Immunoglobulin (GO)	0.0735939	5.63242	1
Non-neurons	Very Low Density Lipoprotein Particle Clearance (GO)	0.0735939	5.63242	1
Non-neurons	Neg. Reg. of Interleukin 1 Beta Secretion (GO)	0.0735939	5.63242	1
Non-neurons	Triglyceride Rich Lipoprotein Particle Clearance (GO)	0.0735939	5.63242	1
Non-neurons	Dendritic Cell Apoptotic Process (GO)	0.0735939	5.63242	1
Non-neurons	Plasma Membrane Organization (GO)	0.0736194	1.41008	1
Dopa neurons	Organelle Biogenesis and Maintenance (Re)	0.0743394	1.1992	1
Non-neurons	Dephosphorylation (GO)	0.074654	1.15819	1
Dopa neurons	Signaling By Ntrks (Re)	0.0748467	1.37319	1
Dopa neurons	Ace2 Pathway (Bi)	0.0750717	3.73326	1
Dopa neurons	Etc Pathway (Bi)	0.0750717	3.73326	1
Dopa neurons	Pos. Reg. of Action Potential (GO)	0.0750717	3.73326	1
Dopa neurons	Amino Acid Betaine Metabolic Process (GO)	0.0750717	3.73326	1
Dopa neurons	Pos. Reg. of Insulin Like Growth Factor Receptor Signaling Pathway (GO)	0.0750717	3.73326	1
Dopa neurons	Transforming Growth Factor Beta1 Production (GO)	0.0750717	3.73326	1
Dopa neurons	Neg. Reg. of Activin Receptor Signaling Pathway (GO)	0.0750717	3.73326	1
Dopa neurons	Pos. Reg. of Fertilization (GO)	0.0750717	3.73326	1
Dopa neurons	Reg. of Oogenesis (GO)	0.0750717	3.73326	1
Dopa neurons	Transport of Nucleosides and Free Purine and Pyrimidine Bases Across The Plasma Membrane (Re)	0.0750717	3.73326	1
Non-neurons	Hif1 Tfpathway (PI)	0.0751233	1.51179	1
Non-neurons	Reg. of Histone Methylation (GO)	0.0751233	1.51179	1
Non-neurons	TRAF6 Mediated IRF7 Activation in Tlr7 8 or 9 Signaling (Re)	0.0751845	2.5821	1
Non-neurons	Mammary Gland Epithelial Cell Differentiation (GO)	0.0751845	2.5821	1
Non-neurons	Neg. Reg. of Glial Cell Proliferation (GO)	0.0751845	2.5821	1
Non-neurons	Cellular Response to Zinc Ion (GO)	0.0751845	2.5821	1
Non-neurons	Linoleic Acid Metabolic Process (GO)	0.0751845	2.5821	1
Non-neurons	Copper Ion Homeostasis (GO)	0.0751845	2.5821	1
Non-neurons	Peptidyl Lysine Dimethylation (GO)	0.0751845	2.5821	1
Non-neurons	Response to UV B (GO)	0.0751845	2.5821	1
Non-neurons	Reg. of Developmental Pigmentation (GO)	0.0751845	2.5821	1
Non-neurons	Dectin 2 Family (Re)	0.0751845	2.5821	1
Non-neurons	TRAF6 Mediated Induction of TAK1 Complex Within TLR4 Complex (Re)	0.0751845	2.5821	1
Non-neurons	FOXO Mediated Transcription of Cell Death Genes (Re)	0.0751845	2.5821	1
Non-neurons	DNA Templated Transcription Initiation (GO)	0.0758966	1.22838	1
Non-neurons	Il27 Pathway (PI)	0.075935	2.19119	1
Non-neurons	S1P Meta Pathway (PI)	0.075935	2.19119	1
Non-neurons	Cytoplasmic mRNA Processing Body Assembly (GO)	0.075935	2.19119	1
Non-neurons	Axon Ensheathment in Central Nervous System (GO)	0.075935	2.19119	1
Non-neurons	Vascular Smooth Muscle Contraction (GO)	0.075935	2.19119	1
Non-neurons	Mature B-Cell Differentiation (GO)	0.075935	2.19119	1
Non-neurons	Mitochondrion Morphogenesis (GO)	0.075935	2.19119	1
Non-neurons	Reg. of Protein Polyubiquitination (GO)	0.075935	2.19119	1
Non-neurons	Neg. Reg. of Viral Transcription (GO)	0.075935	2.19119	1
Non-neurons	Neg. Reg. of mRNA Splicing Via Spliceosome (GO)	0.075935	2.19119	1
Non-neurons	Interleukin 37 Signaling (Re)	0.075935	2.19119	1
Dopa neurons	Dicarboxylic Acid Metabolic Process (GO)	0.0765445	1.51236	1
Dopa neurons	Organic Acid Metabolic Process (GO)	0.0767314	1.11462	1
Dopa neurons	Nucleobase Containing Small Molecule Metabolic Process (GO)	0.0768688	1.18385	1
Non-neurons	Mitotic Sister Chromatid Segregation (GO)	0.0774458	1.29724	1
Dopa neurons	Reg. of Glycoprotein Biosynthetic Process (GO)	0.0775486	1.77853	1
Dopa neurons	Signaling By WNT in Cancer (Re)	0.0775486	1.77853	1
Non-neurons	WNT Noncanonical Pathway (PI)	0.078022	1.7933	1
Non-neurons	IL2 PI3K Pathway (PI)	0.078022	1.7933	1
Non-neurons	Integrin A4b1 Pathway (PI)	0.078022	1.7933	1
Non-neurons	Gpvi Mediated Activation Cascade (Re)	0.078022	1.7933	1
Non-neurons	Pos. Reg. of Protein Targeting to Mitochondrion (GO)	0.078022	1.7933	1
Dopa neurons	Cell Surface Receptor Signaling Pathway Involved in Cell Cell Signaling (GO)	0.0782796	1.13357	1
Dopa neurons	Nerve Development (GO)	0.0788342	1.49459	1
Non-neurons	Ecadherin Nascent Aj Pathway (PI)	0.079357	1.67759	1
Non-neurons	Reg. of Spindle Organization (GO)	0.079357	1.67759	1
Dopa neurons	Acrosome Reaction (GO)	0.0795106	2.00048	1
Dopa neurons	Ionotropic Glutamate Receptor Signaling Pathway (GO)	0.0795106	2.00048	1
Dopa neurons	Cyclin a B1 B2 Associated Events During G2 M Transition (Re)	0.0795106	2.00048	1
Non-neurons	Lipid Catabolic Process (GO)	0.0800735	1.20099	1
Non-neurons	COPI Mediated Anterograde Transport (Re)	0.0803626	1.38395	1
Non-neurons	Supramolecular Fiber Organization (GO)	0.0808816	1.13131	1
Non-neurons	MAPK Pathway (Bi)	0.0809029	1.40992	1
Non-neurons	Transcriptional Reg. of White Adipocyte Differentiation (Re)	0.0809029	1.40992	1
Dopa neurons	Reg. of Response to Drug (GO)	0.0818261	1.39411	1
Dopa neurons	Neg. Reg. of Blood Pressure (GO)	0.0822596	1.72383	1
Dopa neurons	Cell Recognition (GO)	0.082405	1.32969	1
Non-neurons	Protein Localization to Membrane (GO)	0.0824078	1.12986	1
Non-neurons	Reg. of Stem Cell Differentiation (GO)	0.0824498	1.35287	1
Dopa neurons	Crmps in Sema3a Signaling (Re)	0.0833923	2.34684	1
Dopa neurons	Glucocorticoid Metabolic Process (GO)	0.0833923	2.34684	1
Dopa neurons	Indole Containing Compound Metabolic Process (GO)	0.0833923	2.34684	1
Dopa neurons	DNA Methylation Involved in Gamete Generation (GO)	0.0833923	2.34684	1
Dopa neurons	Dendrite Self Avoidance (GO)	0.0833923	2.34684	1
Dopa neurons	Endoplasmic Reticulum Tubular Network Organization (GO)	0.0833923	2.34684	1
Dopa neurons	Signaling By NTRK3 TRKC (Re)	0.0833923	2.34684	1
Non-neurons	Glycine Serine and Threonine Metabolism (KG)	0.0835551	1.87847	1
Non-neurons	VEGF Pathway (Bi)	0.0835551	1.87847	1
Non-neurons	Response to Sterol (GO)	0.0835551	1.87847	1
Non-neurons	N Terminal Protein Amino Acid Modification (GO)	0.0835551	1.87847	1
Non-neurons	ECM Regulators (Na)	0.0838332	1.26834	1
Non-neurons	Protein Monoubiquitination (GO)	0.0843346	1.46601	1
Non-neurons	Platelet Activation (GO)	0.0845357	1.29304	1
Dopa neurons	Columnar Cuboidal Epithelial Cell Differentiation (GO)	0.0846671	1.37696	1
Non-neurons	Pathogenic Escherichia Coli Infection (KG)	0.084835	1.56591	1
Non-neurons	Cmyb Pathway (PI)	0.0849004	1.42597	1
Non-neurons	Signaling By NOTCH1 (Re)	0.0849004	1.42597	1
Dopa neurons	Arginine and Proline Metabolism (KG)	0.0854026	1.54767	1
Dopa neurons	Hedgehog Signaling Pathway (KG)	0.0854026	1.54767	1
Non-neurons	Bone Development (GO)	0.0860478	1.24224	1
Non-neurons	PIP3 Signaling in B Lymphocytes (SG)	0.0862409	1.72212	1
Non-neurons	Aurora B Pathway (PI)	0.0862409	1.72212	1
Non-neurons	Termination of RNA Polymerase II Transcription (GO)	0.0862409	1.72212	1
Non-neurons	Serine Family Amino Acid Metabolic Process (GO)	0.0862409	1.72212	1
Non-neurons	Interleukin 2 Family Signaling (Re)	0.0862409	1.72212	1
Non-neurons	Protein Exit From Endoplasmic Reticulum (GO)	0.086283	1.62837	1
Dopa neurons	Nuclearrs Pathway (Bi)	0.0864253	1.89677	1
Dopa neurons	Glutamine Family Amino Acid Catabolic Process (GO)	0.0864253	1.89677	1
Dopa neurons	Dopamine Metabolic Process (GO)	0.0864253	1.89677	1
Dopa neurons	Synaptic Transmission Dopaminergic (GO)	0.0864253	1.89677	1
Dopa neurons	Pos. Reg. of Organic Acid Transport (GO)	0.0864253	1.89677	1
Dopa neurons	Cell Projection Assembly (GO)	0.0865242	1.13715	1
Non-neurons	Establishment or Maintenance of Cell Polarity (GO)	0.0866192	1.23201	1
Dopa neurons	Pos. Reg. of Ion Transport (GO)	0.0866282	1.21567	1
Dopa neurons	Detection of Mechanical Stimulus (GO)	0.0867007	1.67694	1
Dopa neurons	Cellular Aldehyde Metabolic Process (GO)	0.0867007	1.67694	1
Dopa neurons	Ketone Biosynthetic Process (GO)	0.0867007	1.67694	1
Non-neurons	Neg. Reg. of Growth (GO)	0.0869781	1.21541	1
Non-neurons	Fc Receptor Signaling Pathway (GO)	0.0871826	1.24989	1
Dopa neurons	Core Matrisome (Na)	0.0877144	1.21018	1
Non-neurons	Costimulation By The CD28 Family (Re)	0.0877198	1.49489	1
Non-neurons	Prostate Cancer (KG)	0.0883265	1.38225	1
Non-neurons	Atrbrca Pathway (Bi)	0.0884337	2.0124	1
Non-neurons	Integrin A9b1 Pathway (PI)	0.0884337	2.0124	1
Non-neurons	Modulation By Host of Viral Process (GO)	0.0884337	2.0124	1
Non-neurons	Pigment Granule Organization (GO)	0.0884337	2.0124	1
Non-neurons	Epithelial Structure Maintenance (GO)	0.0884337	2.0124	1
Non-neurons	Response to Lead Ion (GO)	0.0884337	2.0124	1
Non-neurons	Killing of Cells of Other Organism (GO)	0.0884337	2.0124	1
Non-neurons	Mitochondrial Depolarization (GO)	0.0884337	2.0124	1
Non-neurons	Interleukin 8 Secretion (GO)	0.0884337	2.0124	1
Non-neurons	Plasma Membrane Tubulation (GO)	0.0884337	2.0124	1
Dopa neurons	Reg. of Protein Localization (GO)	0.0885058	1.10239	1
Non-neurons	Lamellipodium Organization (GO)	0.0890077	1.40975	1
Non-neurons	Fibroblast Proliferation (GO)	0.0890077	1.40975	1
Non-neurons	Classic Pathway (Bi)	0.0895786	2.81645	1
Non-neurons	Hsp27 Pathway (Bi)	0.0895786	2.81645	1
Non-neurons	Unwinding of DNA (Re)	0.0895786	2.81645	1
Non-neurons	Oligosaccharide Catabolic Process (GO)	0.0895786	2.81645	1
Non-neurons	Pos. Reg. of Macrophage Derived Foam Cell Differentiation (GO)	0.0895786	2.81645	1
Non-neurons	Organ or Tissue Specific Immune Response (GO)	0.0895786	2.81645	1
Non-neurons	Nose Development (GO)	0.0895786	2.81645	1
Non-neurons	Hepatocyte Apoptotic Process (GO)	0.0895786	2.81645	1
Non-neurons	Renal Absorption (GO)	0.0895786	2.81645	1
Non-neurons	Fatty Acid Elongation (GO)	0.0895786	2.81645	1
Non-neurons	Prion Pathway (Bi)	0.0895786	2.81645	1
Non-neurons	Endothelial Cell Morphogenesis (GO)	0.0895786	2.81645	1
Non-neurons	Adenosine Receptor Signaling Pathway (GO)	0.0895786	2.81645	1
Non-neurons	ER Overload Response (GO)	0.0895786	2.81645	1
Non-neurons	Neg. Reg. of Vascular Endothelial Growth Factor Receptor Signaling Pathway (GO)	0.0895786	2.81645	1
Non-neurons	Toll Like Receptor 2 Signaling Pathway (GO)	0.0895786	2.81645	1
Non-neurons	Reg. of Lysosomal Lumen pH (GO)	0.0895786	2.81645	1
Non-neurons	NLRP3 Inflammasome Complex Assembly (GO)	0.0895786	2.81645	1
Non-neurons	Monocyte Chemotactic Protein 1 Production (GO)	0.0895786	2.81645	1
Non-neurons	Methylation (Re)	0.0895786	2.81645	1
Non-neurons	Tissue Regeneration (GO)	0.0907573	1.53294	1
Non-neurons	Pos. Reg. of Dephosphorylation (GO)	0.0907573	1.53294	1
Non-neurons	RHO Gtpases Activate Pkns (Re)	0.0907573	1.53294	1
Dopa neurons	Aldosterone Regulated Sodium Reabsorption (KG)	0.0908887	1.6363	1
Dopa neurons	Sensory Perception of Taste (GO)	0.0908887	1.6363	1
Dopa neurons	Phenol Containing Compound Metabolic Process (GO)	0.0910233	1.50404	1
Dopa neurons	Peptide Ligand Binding Receptors (Re)	0.091033	1.34108	1
Non-neurons	Respiratory System Development (GO)	0.0912739	1.24162	1
Non-neurons	Cardiacegf Pathway (Bi)	0.0914459	2.25351	1
Non-neurons	Thymic T-Cell Selection (GO)	0.0914459	2.25351	1
Non-neurons	Cell Differentiation Involved in Embryonic Placenta Development (GO)	0.0914459	2.25351	1
Non-neurons	Pos. Reg. of Histone Deacetylation (GO)	0.0914459	2.25351	1
Non-neurons	Sertoli Cell Differentiation (GO)	0.0914459	2.25351	1
Non-neurons	Iron Ion Transmembrane Transport (GO)	0.0914459	2.25351	1
Dopa neurons	Ventricular System Development (GO)	0.0928213	1.81381	1
Dopa neurons	Neg. Reg. of Potassium Ion Transport (GO)	0.0928213	1.81381	1
Dopa neurons	Reg. of Amino Acid Transport (GO)	0.0928213	1.81381	1
Dopa neurons	Reg. of Transcription Involved in G1 S Transition of Mitotic Cell Cycle (GO)	0.0928213	1.81381	1
Dopa neurons	Export Across Plasma Membrane (GO)	0.0928213	1.81381	1
Dopa neurons	Sumoylation of Intracellular Receptors (Re)	0.0928213	1.81381	1
Non-neurons	P53 Reg. Pathway (PI)	0.0928846	1.47074	1
Non-neurons	Telomere Maintenance Via Telomere Lengthening (GO)	0.0931049	1.39458	1
Non-neurons	Valine Leucine and Isoleucine Degradation (KG)	0.093141	1.5853	1
Non-neurons	Ps1 Pathway (PI)	0.093141	1.5853	1
Non-neurons	Avb3 Opn Pathway (PI)	0.093409	1.78453	1
Non-neurons	IGF1 Pathway (PI)	0.093409	1.78453	1
Non-neurons	Protein K48 Linked Deubiquitination (GO)	0.093409	1.78453	1
Non-neurons	Neg. Reg. of Gene Silencing (GO)	0.093409	1.78453	1
Non-neurons	Synthesis of Active Ubiquitin: Roles of E1 and E2 Enzymes (Re)	0.093409	1.78453	1
Dopa neurons	Neg. Reg. of Hormone Secretion (GO)	0.0936465	1.48507	1
Dopa neurons	Inorganic Anion Transport (GO)	0.0938122	1.27173	1
Dopa neurons	Trachea Development (GO)	0.0938378	2.1335	1
Dopa neurons	Response to Leptin (GO)	0.0938378	2.1335	1
Dopa neurons	Establishment of Protein Localization to Mitochondrial Membrane (GO)	0.0938378	2.1335	1
Dopa neurons	Diseases Associated With Glycosylation Precursor Biosynthesis (Re)	0.0938378	2.1335	1
Dopa neurons	Renin Angiotensin System (KG)	0.093942	2.84415	1
Dopa neurons	Synthesis of Bile Acids and Bile Salts Via 24 Hydroxycholesterol (Re)	0.093942	2.84415	1
Dopa neurons	DSCAM Interactions (Re)	0.093942	2.84415	1
Dopa neurons	Layer Formation in Cerebral Cortex (GO)	0.093942	2.84415	1
Dopa neurons	Cell Migration Involved in Gastrulation (GO)	0.093942	2.84415	1
Dopa neurons	Ganglioside Biosynthetic Process (GO)	0.093942	2.84415	1
Dopa neurons	Detection of Mechanical Stimulus Involved in Sensory Perception of Sound (GO)	0.093942	2.84415	1
Dopa neurons	Membrane Hyperpolarization (GO)	0.093942	2.84415	1
Dopa neurons	Pos. Reg. of Synaptic Transmission GABAergic (GO)	0.093942	2.84415	1
Dopa neurons	Intraciliary Retrograde Transport (GO)	0.093942	2.84415	1
Dopa neurons	Calcium Import Into The Mitochondrion (GO)	0.093942	2.84415	1
Dopa neurons	Neg. Reg. of Vascular Permeability (GO)	0.093942	2.84415	1
Dopa neurons	Neg. Reg. of Amino Acid Transport (GO)	0.093942	2.84415	1
Dopa neurons	Limb Bud Formation (GO)	0.093942	2.84415	1
Dopa neurons	Cellular Response to Follicle Stimulating Hormone Stimulus (GO)	0.093942	2.84415	1
Dopa neurons	Pos. Reg. of Voltage Gated Potassium Channel Activity (GO)	0.093942	2.84415	1
Dopa neurons	Metabolism of Amine Derived Hormones (Re)	0.093942	2.84415	1
Dopa neurons	Chk1 Chk2 Cds1 Mediated Inactivation of Cyclin B:Cdk1 Complex (Re)	0.093942	2.84415	1
Dopa neurons	Butyrophilin BTN Family Interactions (Re)	0.093942	2.84415	1
Dopa neurons	MET Activates RAS Signaling (Re)	0.093942	2.84415	1
Dopa neurons	Receptor Mediated Mitophagy (Re)	0.093942	2.84415	1
Dopa neurons	Aspartate and Asparagine Metabolism (Re)	0.093942	2.84415	1
Dopa neurons	Biosynthesis of The N Glycan Precursor Dolichol Lipid Linked Oligosaccharide LLO and Transfer to a Nascent Protein (Re)	0.0943441	1.39117	1
Dopa neurons	Phase I Functionalization of Compounds (Re)	0.0943441	1.39117	1
Dopa neurons	Organelle Localization (GO)	0.0949994	1.11531	1
Dopa neurons	Flavonoid Metabolic Process (GO)	0.0950926	5.33152	1
Dopa neurons	Omega Hydroxylase P450 Pathway (GO)	0.0950926	5.33152	1
Dopa neurons	Signaling By Hedgehog (Re)	0.0951187	1.26549	1
Dopa neurons	Forebrain Development (GO)	0.095198	1.16312	1
Non-neurons	UCH Proteinases (Re)	0.0957302	1.35766	1
Non-neurons	Sulfur Compound Biosynthetic Process (GO)	0.095886	1.25392	1
Dopa neurons	Myotube Differentiation (GO)	0.0959782	1.38167	1
Non-neurons	Reg. of Protein Complex Assembly (GO)	0.0965248	1.15215	1
Non-neurons	Neg. Reg. of Cysteine Type Endopeptidase Activity (GO)	0.0971889	1.38036	1
Non-neurons	Microtubule Polymerization or Depolymerization (GO)	0.0972374	1.32976	1
Dopa neurons	L Amino Acid Transport (GO)	0.0985507	1.45168	1
Dopa neurons	Cellular Amino Acid Biosynthetic Process (GO)	0.0985507	1.45168	1
Dopa neurons	Syndecan 1 Pathway (PI)	0.0985709	1.56938	1
Dopa neurons	Reg. of Skeletal Muscle Tissue Development (GO)	0.0985709	1.56938	1
Dopa neurons	Glycogen Biosynthetic Process (GO)	0.0985709	1.56938	1
Dopa neurons	Organic Cation Transport (GO)	0.0987427	1.74593	1
Dopa neurons	Substrate Dependent Cell Migration (GO)	0.0987427	1.74593	1
Dopa neurons	EPHA Mediated Growth Cone Collapse (Re)	0.0987427	1.74593	1
Dopa neurons	Reg. of Reproductive Process (GO)	0.0993726	1.29833	1
Non-neurons	Neg. Reg. of ERBB Signaling Pathway (GO)	0.0999181	1.5473	1
Non-neurons	Histone H3 K9 Modification (GO)	0.0999181	1.5473	1
Non-neurons	Protein K63 Linked Ubiquitination (GO)	0.0999181	1.5473	1
Non-neurons	Reg. of DNA Templated Transcription Elongation (GO)	0.0999181	1.5473	1
Dopa neurons	Mitochondrial Transport (GO)	0.100465	1.19081	1
Non-neurons	Glypican 1pathway (PI)	0.100552	1.87823	1
Non-neurons	Reg. of Natural Killer Cell Activation (GO)	0.100552	1.87823	1
Non-neurons	Cytoplasmic Sequestering of Protein (GO)	0.100552	1.87823	1
Non-neurons	snRNA Processing (GO)	0.100552	1.87823	1
Non-neurons	Inner Ear Receptor Cell Stereocilium Organization (GO)	0.100552	1.87823	1
Non-neurons	Signaling By Erythropoietin (Re)	0.100552	1.87823	1
Non-neurons	Antigen Presentation: Folding Assembly and Peptide Loading of Class I MHC (Re)	0.100552	1.87823	1
Non-neurons	Lipid Homeostasis (GO)	0.1006	1.32047	1
Non-neurons	Post Golgi Vesicle Mediated Transport (GO)	0.1006	1.32047	1
Non-neurons	Tight Junction (KG)	0.101012	1.30012	1
Non-neurons	Reg. of GTPase Activity (GO)	0.101074	1.14108	1
Non-neurons	Delta Np63 Pathway (PI)	0.102314	1.61028	1
Non-neurons	Reg. of Protein Deacetylation (GO)	0.102314	1.61028	1
Non-neurons	Modification By Symbiont of Host Morphology or Physiology (GO)	0.102314	1.61028	1
Non-neurons	Cellular Response to Glucose Starvation (GO)	0.102314	1.61028	1
Non-neurons	Collagen Biosynthetic Process (GO)	0.102314	1.61028	1
Non-neurons	Reg. of Tissue Remodeling (GO)	0.102451	1.4764	1
Non-neurons	Neg. Reg. of Chromatin Organization (GO)	0.102451	1.4764	1
Non-neurons	Formation of Tc Ner Pre Incision Complex (Re)	0.102451	1.4764	1
Non-neurons	Neg. Reg. of Response to DNA Damage Stimulus (GO)	0.102577	1.39338	1
Non-neurons	Cell Cycle Checkpoints (Re)	0.102812	1.18461	1
Non-neurons	Prion Diseases (KG)	0.103039	1.70768	1
Non-neurons	Alpha Synuclein Pathway (PI)	0.103039	1.70768	1
Non-neurons	Neg. Reg. of Intracellular Steroid Hormone Receptor Signaling Pathway (GO)	0.103039	1.70768	1
Non-neurons	T-Helper 1 Type Immune Response (GO)	0.103039	1.70768	1
Non-neurons	Reg. of Vascular Endothelial Growth Factor Receptor Signaling Pathway (GO)	0.103039	1.70768	1
Non-neurons	Reg. of Granulocyte Chemotaxis (GO)	0.103039	1.70768	1
Non-neurons	Defense Response to Gram Neg. Bacterium (GO)	0.103039	1.70768	1
Non-neurons	T-Cell Cytokine Production (GO)	0.103039	1.70768	1
Non-neurons	Reactive Oxygen Species Biosynthetic Process (GO)	0.103096	1.33565	1
Non-neurons	Neg. Reg. of ERK1 and ERK2 Cascade (GO)	0.103112	1.42823	1
Dopa neurons	Peptide Cross Linking (GO)	0.103204	1.98113	1
Dopa neurons	Pos. Reg. of Behavior (GO)	0.103204	1.98113	1
Dopa neurons	Pos. Reg. of Heart Rate (GO)	0.103204	1.98113	1
Dopa neurons	Amine Biosynthetic Process (GO)	0.103204	1.98113	1
Dopa neurons	Low Density Lipoprotein Receptor Particle Metabolic Process (GO)	0.103204	1.98113	1
Dopa neurons	Neurotransmitter Receptor Localization to Postsynaptic Specialization Membrane (GO)	0.103204	1.98113	1
Dopa neurons	Pos. Reg. of Sodium Ion Transport (GO)	0.104232	1.68937	1
Dopa neurons	Insulin Signaling Pathway (KG)	0.104423	1.27415	1
Dopa neurons	Vesicle Mediated Transport to The Plasma Membrane (GO)	0.104633	1.33465	1
Dopa neurons	Carbohydrate Biosynthetic Process (GO)	0.10497	1.21932	1
Dopa neurons	Excretion (GO)	0.105428	1.51655	1
Dopa neurons	Mitochondrial Electron Transport NADH to Ubiquinone (GO)	0.105428	1.51655	1
Dopa neurons	Mitochondrial Biogenesis (Re)	0.105904	1.32815	1
Non-neurons	Anatomical Structure Regression (GO)	0.10648	3.28544	1
Non-neurons	Leydig Cell Differentiation (GO)	0.10648	3.28544	1
Non-neurons	Neg. Reg. of Humoral Immune Response (GO)	0.10648	3.28544	1
Non-neurons	Neg. Reg. of Epidermis Development (GO)	0.10648	3.28544	1
Non-neurons	Response to Folic Acid (GO)	0.10648	3.28544	1
Non-neurons	Estrogen Metabolic Process (GO)	0.10648	3.28544	1
Non-neurons	Pos. Reg. of Inflammatory Response to Antigenic Stimulus (GO)	0.10648	3.28544	1
Non-neurons	Monoubiquitinated Protein Deubiquitination (GO)	0.10648	3.28544	1
Non-neurons	Neg. Reg. of Cell Size (GO)	0.10648	3.28544	1
Non-neurons	Neg. Reg. of Single Stranded Viral RNA Replication Via Double Stranded DNA Intermediate (GO)	0.10648	3.28544	1
Non-neurons	NK T-Cell Activation (GO)	0.10648	3.28544	1
Non-neurons	Neg. Reg. of Type I Interferon Mediated Signaling Pathway (GO)	0.10648	3.28544	1
Non-neurons	Reg. of Autophagosome Maturation (GO)	0.10648	3.28544	1
Non-neurons	Pos. Reg. of Endoplasmic Reticulum Stress Induced Intrinsic Apoptotic Signaling Pathway (GO)	0.10648	3.28544	1
Non-neurons	Reg. of PERK Mediated Unfolded Protein Response (GO)	0.10648	3.28544	1
Non-neurons	Reg. of Gene Expression By Hypoxia Inducible Factor (Re)	0.10648	3.28544	1
Non-neurons	Beta Oxidation of Very Long Chain Fatty Acids (Re)	0.10648	3.28544	1
Non-neurons	Reg. of FOXO Transcriptional Activity By Acetylation (Re)	0.10648	3.28544	1
Non-neurons	Neutral Lipid Metabolic Process (GO)	0.10676	1.32549	1
Non-neurons	Protein Complex Oligomerization (GO)	0.10688	1.13023	1
Non-neurons	ARF 3pathway (PI)	0.106939	2.03451	1
Non-neurons	Response to Dietary Excess (GO)	0.106939	2.03451	1
Non-neurons	Reg. of Protein Sumoylation (GO)	0.106939	2.03451	1
Non-neurons	T-Cell Lineage Commitment (GO)	0.106939	2.03451	1
Non-neurons	Neg. Reg. of Endoplasmic Reticulum Stress Induced Intrinsic Apoptotic Signaling Pathway (GO)	0.106939	2.03451	1
Non-neurons	Amine Catabolic Process (GO)	0.106939	2.03451	1
Non-neurons	Reg. of Ubiquitin Protein Ligase Activity (GO)	0.106939	2.03451	1
Non-neurons	Histone H3 Deacetylation (GO)	0.106939	2.03451	1
Non-neurons	Reg. of Double Strand Break Repair Via Nonhomologous End Joining (GO)	0.106939	2.03451	1
Non-neurons	Protein Methylation (Re)	0.106939	2.03451	1
Non-neurons	Cellular Response to Light Stimulus (GO)	0.107299	1.30316	1
Non-neurons	Myeloid Cell Development (GO)	0.10821	1.45199	1
Dopa neurons	Pos. Reg. of Cell Morphogenesis Involved in Differentiation (GO)	0.108644	1.25459	1
Dopa neurons	Microtubule Based Process (GO)	0.108689	1.10752	1
Non-neurons	Taxis (GO)	0.108858	1.12376	1
Dopa neurons	Transport of Bile Salts and Organic Acids Metal Ions and Amine Compounds (Re)	0.109074	1.3877	1
Dopa neurons	Activin Receptor Signaling Pathway (GO)	0.109327	1.64151	1
Dopa neurons	Glycosphingolipid Biosynthesis Globo Series (KG)	0.109859	2.39981	1
Dopa neurons	Otic Vesicle Development (GO)	0.109859	2.39981	1
Dopa neurons	Organelle Inheritance (GO)	0.109859	2.39981	1
Dopa neurons	Activation of Transmembrane Receptor Protein Tyrosine Kinase Activity (GO)	0.109859	2.39981	1
Dopa neurons	Parasympathetic Nervous System Development (GO)	0.109859	2.39981	1
Dopa neurons	Response to Leucine (GO)	0.109859	2.39981	1
Dopa neurons	Engulfment of Apoptotic Cell (GO)	0.109859	2.39981	1
Dopa neurons	Lateral Sprouting From An Epithelium (GO)	0.109859	2.39981	1
Dopa neurons	Reg. of Fertilization (GO)	0.109859	2.39981	1
Dopa neurons	Reg. of Postsynaptic Neurotransmitter Receptor Activity (GO)	0.109859	2.39981	1
Dopa neurons	Synthesis of IP2 IP and Ins in The Cytosol (Re)	0.109859	2.39981	1
Dopa neurons	CREB1 Phosphorylation Through The Activation of Adenylate Cyclase (Re)	0.109859	2.39981	1
Non-neurons	Signaling By SCF KIT (Re)	0.110137	1.56554	1
Non-neurons	Telomere Capping (GO)	0.110137	1.56554	1
Non-neurons	Hif Pathway (Bi)	0.110733	2.34709	1
Non-neurons	Pos. Reg. of Viral Release From Host Cell (GO)	0.110733	2.34709	1
Non-neurons	Reg. of Nuclear Cell Cycle DNA Replication (GO)	0.110733	2.34709	1
Non-neurons	Neg. Reg. of T-Cell Mediated Immunity (GO)	0.110733	2.34709	1
Non-neurons	Myelin Maintenance (GO)	0.110733	2.34709	1
Non-neurons	Ventricular Trabecula Myocardium Morphogenesis (GO)	0.110733	2.34709	1
Non-neurons	Pos. Reg. of Receptor Recycling (GO)	0.110733	2.34709	1
Non-neurons	Formation of Cytoplasmic Translation Initiation Complex (GO)	0.110733	2.34709	1
Non-neurons	Rap Protein Signal Transduction (GO)	0.110733	2.34709	1
Non-neurons	Cell Cell Adhesion Mediated By Integrin (GO)	0.110733	2.34709	1
Non-neurons	Platelet Derived Growth Factor Receptor Beta Signaling Pathway (GO)	0.110733	2.34709	1
Non-neurons	Reg. of Innate Immune Responses to Cytosolic DNA (Re)	0.110733	2.34709	1
Dopa neurons	Appendage Development (GO)	0.111068	1.24351	1
Dopa neurons	Proximal Tubule Bicarbonate Reclamation (KG)	0.111625	1.86686	1
Dopa neurons	Neg. Reg. of Anion Transport (GO)	0.111625	1.86686	1
Non-neurons	Morphogenesis of a Branching Structure (GO)	0.112111	1.22379	1
Non-neurons	Skeletal System Morphogenesis (GO)	0.112133	1.21427	1
Non-neurons	Carm ER Pathway (Bi)	0.112248	1.77388	1
Non-neurons	Pos. Reg. of Epithelial Cell Apoptotic Process (GO)	0.112248	1.77388	1
Non-neurons	Neg. Reg. of Epithelial Cell Differentiation (GO)	0.112248	1.77388	1
Non-neurons	Retinoic Acid Receptor Signaling Pathway (GO)	0.112248	1.77388	1
Non-neurons	Response to Oxidative Stress (GO)	0.112385	1.13941	1
Non-neurons	Il1 Pathway (PI)	0.112425	1.64363	1
Non-neurons	ncRNA 3 End Processing (GO)	0.112425	1.64363	1
Non-neurons	Reg. of DNA Templated Transcription Initiation (GO)	0.112425	1.64363	1
Non-neurons	Activated T-Cell Proliferation (GO)	0.112425	1.64363	1
Non-neurons	Neg. Reg. of Lipid Localization (GO)	0.112425	1.64363	1
Non-neurons	Neg. Reg. of Cell Development (GO)	0.112636	1.16207	1
Non-neurons	Ppara Pathway (Bi)	0.113194	1.48329	1
Non-neurons	Morphogenesis of An Epithelial Sheet (GO)	0.113194	1.48329	1
Dopa neurons	MAPK Family Signaling Cascades (Re)	0.113739	1.17148	1
Non-neurons	TCR Pathway (PI)	0.113903	1.42969	1
Dopa neurons	Cellular Amino Acid Metabolic Process (GO)	0.114036	1.16911	1
Dopa neurons	Bile Acid Metabolic Process (GO)	0.114063	1.60049	1
Dopa neurons	Signaling By FGFR4 (Re)	0.114063	1.60049	1
Dopa neurons	Activation of MAPKK Activity (GO)	0.114394	1.45531	1
Non-neurons	Stem Cell Differentiation (GO)	0.115247	1.19346	1
Non-neurons	Signal Transduction By Protein Phosphorylation (GO)	0.115281	1.09593	1
Non-neurons	Neg. Reg. of Protein Modification By Small Protein Conjugation or Removal (GO)	0.115982	1.35081	1
Non-neurons	Reg. of Epithelial to Mesenchymal Transition (GO)	0.115982	1.35081	1
Non-neurons	Signaling By MET (Re)	0.115982	1.35081	1
Dopa neurons	Reg. of Calcium Ion Transmembrane Transporter Activity (GO)	0.116014	1.35008	1
Dopa neurons	Heparan Sulfate Heparin Hs GAG Metabolism (Re)	0.117076	1.43846	1
Dopa neurons	Lipid Phosphorylation (GO)	0.117076	1.43846	1
Dopa neurons	Endoplasmic Reticulum Organization (GO)	0.117076	1.43846	1
Dopa neurons	Reg. of Cellular Amino Acid Metabolic Process (GO)	0.117076	1.43846	1
Non-neurons	Response to Radiation (GO)	0.117228	1.13497	1
Non-neurons	Reg. of Protein Complex Disassembly (GO)	0.117658	1.29792	1
Non-neurons	CDC42 Pathway (PI)	0.118138	1.37585	1
Dopa neurons	Phospholipid Dephosphorylation (GO)	0.118473	1.56494	1
Dopa neurons	Degradation of Beta Catenin By The Destruction Complex (Re)	0.119075	1.33441	1
Dopa neurons	Response to Prostaglandin (GO)	0.119221	1.77798	1
Dopa neurons	Relaxation of Muscle (GO)	0.119221	1.77798	1
Dopa neurons	Glycolytic Process Through Fructose 6 Phosphate (GO)	0.119221	1.77798	1
Dopa neurons	Reg. of Protein Localization to Synapse (GO)	0.119221	1.77798	1
Non-neurons	T-Cell Differentiation in Thymus (GO)	0.119527	1.40926	1
Non-neurons	Production of Small RNA Involved in Gene Silencing By RNA (GO)	0.119681	1.45609	1
Dopa neurons	Amine Metabolic Process (GO)	0.119774	1.26203	1
Dopa neurons	Midbrain Development (GO)	0.120515	1.32721	1
Non-neurons	Reg. of Chromosome Segregation (GO)	0.121287	1.31074	1
Non-neurons	Il2rb Pathway (Bi)	0.121557	1.58943	1
Non-neurons	Reg. of Acute Inflammatory Response (GO)	0.121557	1.58943	1
Non-neurons	Blood Vessel Remodeling (GO)	0.121557	1.58943	1
Non-neurons	Pos. Reg. of DNA Recombination (GO)	0.121557	1.58943	1
Non-neurons	Schwann Cell Differentiation (GO)	0.121557	1.58943	1
Non-neurons	Ovarian Tumor Domain Proteases (Re)	0.121557	1.58943	1
Non-neurons	Biosynthesis of Unsaturated Fatty Acids (KG)	0.121621	1.878	1
Non-neurons	S1P S1P1 Pathway (PI)	0.121621	1.878	1
Non-neurons	Ecadherin Keratinocyte Pathway (PI)	0.121621	1.878	1
Non-neurons	Hyperosmotic Response (GO)	0.121621	1.878	1
Non-neurons	Vitamin Biosynthetic Process (GO)	0.121621	1.878	1
Non-neurons	Reg. of Platelet Derived Growth Factor Receptor Signaling Pathway (GO)	0.121621	1.878	1
Non-neurons	Inositol Trisphosphate Biosynthetic Process (GO)	0.121621	1.878	1
Non-neurons	Plasma Lipoprotein Remodeling (Re)	0.121621	1.878	1
Dopa neurons	Nucleoside Bisphosphate Metabolic Process (GO)	0.122038	1.40879	1
Dopa neurons	Ca2plus Pathway (Re)	0.122038	1.40879	1
Dopa neurons	Neg. Reg. of Reproductive Process (GO)	0.122585	1.53384	1
Dopa neurons	Sulfur Compound Transport (GO)	0.122585	1.53384	1
Dopa neurons	Membrane Repolarization (GO)	0.122585	1.53384	1
Dopa neurons	Smoothened Signaling Pathway (GO)	0.122673	1.24891	1
Non-neurons	Response to Extracellular Stimulus (GO)	0.12329	1.12423	1
Dopa neurons	Reg. of cAMP Dependent Protein Kinase Activity (GO)	0.123396	2.13317	1
Dopa neurons	Mitochondrial Transcription (GO)	0.123396	2.13317	1
Dopa neurons	Postsynaptic Modulation of Chemical Synaptic Transmission (GO)	0.123396	2.13317	1
Dopa neurons	Reg. of Gonad Development (GO)	0.123396	2.13317	1
Dopa neurons	Phase 4 Resting Membrane Potential (Re)	0.123396	2.13317	1
Non-neurons	Death Pathway (Bi)	0.123509	1.69039	1
Non-neurons	Attachment of Spindle Microtubules to Kinetochore (GO)	0.123509	1.69039	1
Non-neurons	Response to Interleukin 4 (GO)	0.123509	1.69039	1
Non-neurons	Neg. Reg. of DNA Repair (GO)	0.123509	1.69039	1
Non-neurons	Embryonic Digestive Tract Development (GO)	0.123509	1.69039	1
Non-neurons	Epithelial Cell Development (GO)	0.123656	1.20557	1
Non-neurons	Cellular Response to Toxic Substance (GO)	0.12421	1.18854	1
Dopa neurons	Retinoic Acid Metabolic Process (GO)	0.124541	3.19927	1
Dopa neurons	Receptor Guanylyl Cyclase Signaling Pathway (GO)	0.124541	3.19927	1
Dopa neurons	Reg. of Nitric Oxide Mediated Signal Transduction (GO)	0.124541	3.19927	1
Dopa neurons	Lipid Glycosylation (GO)	0.124541	3.19927	1
Dopa neurons	Saliva Secretion (GO)	0.124541	3.19927	1
Non-neurons	Small Cell Lung Cancer (KG)	0.124751	1.32661	1
Non-neurons	tRNA Processing (Re)	0.124834	1.28162	1
Non-neurons	Reg. of Triglyceride Catabolic Process (GO)	0.124989	4.69303	1
Non-neurons	Neg. Reg. of Megakaryocyte Differentiation (GO)	0.124989	4.69303	1
Non-neurons	Response to Mercury Ion (GO)	0.124989	4.69303	1
Non-neurons	Rhodopsin Pathway (Bi)	0.124989	4.69303	1
Non-neurons	Chylomicron Assembly (GO)	0.124989	4.69303	1
Non-neurons	Immunological Memory Process (GO)	0.124989	4.69303	1
Non-neurons	RUNX1 and FOXP3 Control The Development of Regulatory T Lymphocytes Tregs (Re)	0.124989	4.69303	1
Non-neurons	Era Genomic Pathway (PI)	0.125079	1.39046	1
Non-neurons	Response to Cold (GO)	0.12531	1.49184	1
Non-neurons	Pos. Reg. of Cell Cycle G1 S Phase Transition (GO)	0.12531	1.49184	1
Non-neurons	Homologous Recombination (GO)	0.12531	1.49184	1
Dopa neurons	Developmental Induction (GO)	0.126097	1.70688	1
Dopa neurons	Glutathione Metabolism (KG)	0.126424	1.50639	1
Dopa neurons	Drug Metabolic Process (GO)	0.126498	1.15852	1
Dopa neurons	Polyol Metabolic Process (GO)	0.126517	1.38352	1
Dopa neurons	Diencephalon Development (GO)	0.126517	1.38352	1
Non-neurons	Neg. Reg. of Protein Serine Threonine Kinase Activity (GO)	0.127115	1.25951	1
Dopa neurons	Axo Dendritic Transport (GO)	0.128593	1.37224	1
Dopa neurons	Synaptic Vesicle Recycling (GO)	0.128593	1.37224	1
Non-neurons	Ub Specific Processing Proteases (Re)	0.128891	1.20708	1
Dopa neurons	ABC Transporters (KG)	0.130014	1.482	1
Dopa neurons	NFAT Pathway (Bi)	0.130014	1.482	1
Dopa neurons	ERBB2 Erbb3 Pathway (PI)	0.130014	1.482	1
Dopa neurons	Response to Cocaine (GO)	0.130014	1.482	1
Dopa neurons	Peptidyl Cysteine Modification (GO)	0.130014	1.482	1
Non-neurons	CCR5 Pathway (Bi)	0.13019	2.06555	1
Non-neurons	Nfkappab Atypical Pathway (PI)	0.13019	2.06555	1
Non-neurons	Syndecan 3 Pathway (PI)	0.13019	2.06555	1
Non-neurons	Initial Triggering of Complement (Re)	0.13019	2.06555	1
Non-neurons	Natural Killer Cell Differentiation (GO)	0.13019	2.06555	1
Non-neurons	Neg. Reg. of Translational Initiation (GO)	0.13019	2.06555	1
Non-neurons	Protein Localization to Chromosome Centromeric Region (GO)	0.13019	2.06555	1
Non-neurons	Reg. of Cysteine Type Endopeptidase Activity Involved in Apoptotic Signaling Pathway (GO)	0.13019	2.06555	1
Non-neurons	Glomerular Epithelium Development (GO)	0.13019	2.06555	1
Non-neurons	Neg. Reg. of Chemokine Production (GO)	0.13019	2.06555	1
Non-neurons	Cholesterol Storage (GO)	0.13019	2.06555	1
Non-neurons	3 UTR Mediated mRNA Destabilization (GO)	0.13019	2.06555	1
Non-neurons	Formation of Senescence Associated Heterochromatin Foci SAHF (Re)	0.13019	2.06555	1
Non-neurons	RAB Reg. of Trafficking (Re)	0.130368	1.25324	1
Non-neurons	Spindle Localization (GO)	0.13043	1.54298	1
Non-neurons	Maintenance of Protein Localization in Organelle (GO)	0.13043	1.54298	1
Non-neurons	Peripheral Nervous System Development (GO)	0.130557	1.3731	1
Dopa neurons	LIS1 Pathway (PI)	0.132342	1.64871	1
Dopa neurons	Activation of Protein Kinase B Activity (GO)	0.132342	1.64871	1
Non-neurons	Angiopoietin Receptor Pathway (PI)	0.132653	1.46114	1
Non-neurons	Reg. of Protein Tyrosine Kinase Activity (GO)	0.132721	1.3336	1
Dopa neurons	Cell Redox Homeostasis (GO)	0.134246	1.34276	1
Non-neurons	Triglyceride Metabolic Process (GO)	0.134335	1.62208	1
Non-neurons	Amyloid Beta Clearance (GO)	0.134335	1.62208	1
Non-neurons	Carboxyterminal Post Translational Modifications of Tubulin (Re)	0.134335	1.62208	1
Dopa neurons	Organic Hydroxy Compound Metabolic Process (GO)	0.134605	1.1233	1
Dopa neurons	Reg. of Skeletal Muscle Cell Differentiation (GO)	0.135013	1.95544	1
Dopa neurons	Response to Caffeine (GO)	0.135013	1.95544	1
Non-neurons	D4gdi Pathway (Bi)	0.135061	2.50322	1
Non-neurons	Myosin Pathway (Bi)	0.135061	2.50322	1
Non-neurons	Reg Cascade of Cyclin Expr (SA)	0.135061	2.50322	1
Non-neurons	CD28 Dependent Vav1 Pathway (Re)	0.135061	2.50322	1
Non-neurons	Advanced Glycosylation Endproduct Receptor Signaling (Re)	0.135061	2.50322	1
Non-neurons	Reg. of Respiratory Burst (GO)	0.135061	2.50322	1
Non-neurons	White Fat Cell Differentiation (GO)	0.135061	2.50322	1
Non-neurons	Endocardium Development (GO)	0.135061	2.50322	1
Non-neurons	Fatty Acid Beta Oxidation Using Acyl CoA Dehydrogenase (GO)	0.135061	2.50322	1
Non-neurons	Neg. Reg. of Leukocyte Degranulation (GO)	0.135061	2.50322	1
Non-neurons	Pos. Reg. of B-Cell Differentiation (GO)	0.135061	2.50322	1
Non-neurons	Neg. Reg. of Myeloid Cell Apoptotic Process (GO)	0.135061	2.50322	1
Non-neurons	Respiratory Burst Involved in Defense Response (GO)	0.135061	2.50322	1
Non-neurons	DNA Unwinding Involved in DNA Replication (GO)	0.135061	2.50322	1
Non-neurons	Protein Polyglutamylation (GO)	0.135061	2.50322	1
[truncated: 11,742 more rows]
