# Supplementary material for: Downregulated transcription in chromosomal domains of midbrain dopamine neurons linked to schizophrenia.
Source: Research Square preprint supplement (doi:10.21203/rs.3.rs-5354582/v1), 2024-11-08
Supplement: Supplementary file 2 [file 6b73f0e7d9e3cb8276b1c352.xlsx]

## Sheet: A
Transcript analysis of Dopa neurons in SCZ vs Controls using limma
Tx ID	logFC	AveExpr	t	P.Value	adj.P.Val
ENST00000589427	2.34753	-0.236167	5.54002	7.67541e-07	0.0334195
ENST00000395761	2.88569	-1.02559	5.45256	8.64625e-07	0.0334195
ENST00000558937	2.35008	-1.52064	5.24449	1.90913e-06	0.0491945
ENST00000580011	2.11626	-1.47973	5.02132	4.41315e-06	0.0852885
ENST00000642855	2.108	-0.127476	4.92759	6.25452e-06	0.088083
ENST00000300060	2.24395	-0.526669	4.86696	7.8174e-06	0.088083
ENST00000274276	2.74122	0.68141	4.8615	7.97606e-06	0.088083
ENST00000600252	2.08576	-1.61166	4.81254	9.54915e-06	0.0892
ENST00000585609	2.18319	0.553683	4.75976	1.15802e-05	0.0892
ENST00000377670	1.87748	2.22116	4.73091	1.42884e-05	0.0892
ENST00000254528	1.66201	3.33135	4.69691	1.4557e-05	0.0892
ENST00000494150	1.97934	-1.37952	4.68728	1.50748e-05	0.0892
ENST00000375715	1.83999	-2.04807	4.64819	1.74126e-05	0.0892
ENST00000649871	1.2881	1.92333	4.63691	1.80889e-05	0.0892
ENST00000561486	1.04428	3.28255	4.62517	1.88711e-05	0.0892
ENST00000420294	-2.12051	-0.516279	-4.61031	1.99117e-05	0.0892
ENST00000573023	2.08769	-0.463406	4.55609	2.41917e-05	0.0892
ENST00000547744	1.88096	-0.100109	4.55471	2.43167e-05	0.0892
ENST00000560377	1.92068	-1.0109	4.55236	2.45168e-05	0.0892
ENST00000313543	2.2304	1.65109	4.53152	2.64155e-05	0.0892
ENST00000573104	-1.92315	0.00660525	-4.5282	2.69516e-05	0.0892
ENST00000558314	1.98307	-1.25506	4.52108	2.74341e-05	0.0892
ENST00000526990	1.98032	-0.407456	4.50968	2.85587e-05	0.0892
ENST00000473014	2.0524	-1.06483	4.52715	3.04409e-05	0.0892
ENST00000517099	-1.63213	1.05837	-4.48874	3.07715e-05	0.0892
ENST00000413432	0.66359	5.48099	4.47797	3.19739e-05	0.0892
ENST00000610745	2.74639	0.389152	4.47094	3.27822e-05	0.0892
ENST00000412951	1.79567	-2.11383	4.45434	3.47734e-05	0.0892
ENST00000498999	2.02528	1.06271	4.4487	3.54757e-05	0.0892
ENST00000523945	-1.95185	-0.398017	-4.44703	3.57853e-05	0.0892
ENST00000612349	2.3889	1.29747	4.43742	3.69226e-05	0.0892
ENST00000623026	1.90798	0.858075	4.4373	3.69388e-05	0.0892
ENST00000550683	2.32519	0.0819083	4.42872	3.80782e-05	0.0892
ENST00000261978	2.13563	1.42718	4.40671	4.11597e-05	0.0920987
ENST00000261233	1.83114	2.94812	4.40303	4.16984e-05	0.0920987
ENST00000434319	2.3153	-1.68453	4.39054	4.35784e-05	0.0935773
ENST00000446543	2.49342	0.413798	4.3884	4.58493e-05	0.0949768
ENST00000389916	2.04969	-0.0210973	4.35984	4.85483e-05	0.0949768
ENST00000414273	2.89164	3.81289	4.35047	5.0173e-05	0.0949768
ENST00000459077	1.40636	1.65574	4.34603	5.09618e-05	0.0949768
ENST00000612806	2.16657	-1.48833	4.33696	5.26077e-05	0.0949768
ENST00000469269	2.35147	-0.428074	4.33012	5.38842e-05	0.0949768
ENST00000370630	1.21817	2.86701	4.32598	5.46713e-05	0.0949768
ENST00000370742	1.90984	-1.34419	4.32343	5.51624e-05	0.0949768
ENST00000328032	-1.75643	1.44868	-4.31639	5.65383e-05	0.0949768
ENST00000359543	2.1309	1.36258	4.31243	5.73257e-05	0.0949768
ENST00000246006	2.23082	2.2357	4.31035	5.77449e-05	0.0949768
ENST00000312584	2.11006	0.847744	4.28156	6.38496e-05	0.0974917
ENST00000531319	-1.62019	1.68167	-4.28005	6.4653e-05	0.0974917
ENST00000491983	-1.92903	1.49448	-4.27567	6.51723e-05	0.0974917
ENST00000608763	-0.846381	5.96035	-4.27451	6.55228e-05	0.0974917
ENST00000357503	1.74998	1.13811	4.28457	6.55796e-05	0.0974917
ENST00000451137	1.92267	3.32648	4.26629	6.73365e-05	0.097757
ENST00000388820	1.75143	-0.388464	4.25898	6.9069e-05	0.097757
ENST00000563924	1.40224	5.38416	4.25533	7.04272e-05	0.097757
ENST00000248564	2.11646	0.238113	4.24827	7.16874e-05	0.097757
ENST00000326341	1.79455	-0.938318	4.2479	7.2081e-05	0.097757
ENST00000642525	-1.74445	0.162434	-4.21744	7.97749e-05	0.106142
ENST00000505254	2.07383	-0.972428	4.21299	8.10098e-05	0.106142
ENST00000373884	1.47492	1.3102	4.19234	8.70002e-05	0.112091
ENST00000474777	2.24474	-0.839673	4.17836	9.12978e-05	0.113898
ENST00000261405	1.95594	4.94403	4.17819	9.13496e-05	0.113898
ENST00000484652	-1.56097	2.35184	-4.16458	9.58131e-05	0.117059
ENST00000616721	2.00512	2.08589	4.15916	9.75313e-05	0.117059
ENST00000221132	2.11817	-0.938946	4.15651	0.00010069	0.117059
ENST00000632775	1.90992	-1.67595	4.14579	0.000102116	0.117059
ENST00000502844	-0.939764	3.88888	-4.14368	0.000102858	0.117059
ENST00000457540	1.72108	2.70576	4.14274	0.00010319	0.117059
ENST00000377047	-0.896849	7.24116	-4.13469	0.000106745	0.117059
ENST00000387347	1.27454	11.1321	4.13091	0.000107461	0.117059
ENST00000497230	2.275	0.200313	4.12963	0.000107934	0.117059
ENST00000602964	2.3564	1.98777	4.12392	0.000110063	0.117059
ENST00000582401	1.75195	3.10549	4.12309	0.000110542	0.117059
ENST00000524277	1.67074	-1.77719	4.11712	0.000112656	0.11755
ENST00000531322	-0.954052	3.26187	-4.11077	0.00011513	0.11755
ENST00000371488	1.95024	-1.74087	4.1164	0.00011682	0.11755
ENST00000376085	1.8223	-1.57736	4.10644	0.000117087	0.11755
ENST00000458341	1.64275	0.335561	4.09608	0.000121051	0.119763
ENST00000319092	1.12355	2.67486	4.08612	0.000125232	0.119763
ENST00000500741	-0.69259	5.51217	-4.0854	0.000125542	0.119763
ENST00000372852	1.6344	2.36294	4.08596	0.000125925	0.119763
ENST00000415547	-1.98257	-0.254265	-4.08487	0.000127038	0.119763
ENST00000488424	-1.93319	-0.198217	-4.07824	0.000128639	0.119811
ENST00000621798	-1.20756	3.46027	-4.06757	0.000133395	0.122761
ENST00000444604	1.70658	-0.853183	4.05641	0.000138549	0.12506
ENST00000450046	2.06796	-0.258259	4.05348	0.000140243	0.12506
ENST00000569183	-1.72051	-0.710296	-4.05178	0.000140746	0.12506
ENST00000460886	1.74611	-1.96933	4.04274	0.00014513	0.126061
ENST00000306279	1.85195	0.260831	4.04228	0.000145354	0.126061
ENST00000460489	1.25277	1.96332	4.06741	0.000146764	0.126061
ENST00000374695	1.30738	4.18069	4.02341	0.000154945	0.128077
ENST00000378402	1.91028	1.01256	4.03366	0.000157458	0.128077
ENST00000462701	-1.65239	-0.415522	-4.01453	0.000159664	0.128077
ENST00000280612	1.26232	4.78333	4.01153	0.000161291	0.128077
ENST00000409797	1.59054	-1.89956	4.01095	0.000161605	0.128077
ENST00000368918	0.645093	6.20156	4.00867	0.000163259	0.128077
ENST00000618852	0.63414	5.75528	4.007	0.000163779	0.128077
ENST00000642236	1.75471	-0.478282	4.00642	0.000164469	0.128077
ENST00000588712	-0.918402	3.8566	-4.00618	0.00016508	0.128077
ENST00000586292	1.88207	-0.91346	4.001	0.000167122	0.128077
ENST00000637474	-0.949237	6.79602	-3.99856	0.000169746	0.128077
ENST00000614517	2.28647	0.534298	4.0615	0.000170185	0.128077
ENST00000361789	1.48849	8.99001	3.98931	0.000173842	0.128077
ENST00000329399	1.78829	-1.8342	3.98681	0.000176504	0.128077
ENST00000310323	-1.58154	-1.19393	-3.99445	0.000177598	0.128077
ENST00000639345	-0.892674	7.14815	-3.98442	0.000177771	0.128077
ENST00000648170	1.80293	-0.925532	3.97519	0.000182298	0.128077
ENST00000233202	2.03785	-0.223966	3.98654	0.000182632	0.128077
ENST00000557873	1.42249	0.396312	3.97249	0.000183957	0.128077
ENST00000538967	-1.83971	-0.243373	-3.97041	0.000185251	0.128077
ENST00000645181	-1.00426	3.87539	-3.96815	0.00018666	0.128077
ENST00000343110	1.70292	3.28227	3.99029	0.000186978	0.128077
ENST00000502555	1.56511	-1.85955	3.96726	0.000187219	0.128077
ENST00000254691	1.9502	0.662742	3.95857	0.000192757	0.13071
ENST00000383781	-1.70771	-0.209297	-3.95239	0.000196796	0.131549
ENST00000524123	-1.14861	4.36874	-3.95214	0.000197398	0.131549
ENST00000534294	2.08803	0.106035	3.98754	0.000200208	0.132281
ENST00000366516	-1.28833	1.86826	-3.94642	0.000202806	0.13267
ENST00000249075	1.83003	-1.57114	3.93944	0.000205519	0.13267
ENST00000562968	2.04806	-0.70308	3.942	0.000205945	0.13267
ENST00000343737	1.79852	0.256385	3.94407	0.000209328	0.133735
ENST00000643485	1.6171	-1.65845	3.92943	0.000212511	0.134482
ENST00000569359	1.86322	-0.811701	3.93255	0.000214098	0.134482
ENST00000624177	1.78366	-0.539286	3.92373	0.000216595	0.134482
ENST00000358912	1.00214	4.38388	3.92254	0.000217457	0.134482
ENST00000618922	1.78316	-0.397879	3.91715	0.000221406	0.135838
ENST00000361390	1.51017	8.82943	3.91234	0.000224987	0.135945
ENST00000367976	1.83741	3.16993	3.90979	0.000226912	0.135945
ENST00000442316	-1.24608	5.93628	-3.90861	0.000228124	0.135945
ENST00000561742	1.85748	-1.70088	3.90666	0.00022929	0.135945
ENST00000542198	-1.69436	0.261038	-3.90624	0.000230736	0.135945
ENST00000568932	-1.85462	-0.421429	-3.90572	0.000232131	0.135945
ENST00000509840	-1.32543	1.95541	-3.90054	0.000234381	0.13623
ENST00000649389	-1.76258	0.506269	-3.89238	0.000242117	0.139676
ENST00000437680	-1.17976	2.87973	-3.88444	0.000247024	0.141452
ENST00000422542	1.56392	-1.94919	3.87516	0.000254603	0.144127
ENST00000397146	1.4062	2.98807	3.87298	0.000256449	0.144127
ENST00000623756	1.913	0.369095	3.86881	0.000260239	0.144127
ENST00000292432	1.81633	1.06657	3.86559	0.000262813	0.144127
ENST00000586137	-1.36546	1.8384	-3.86689	0.0002633	0.144127
ENST00000646407	1.52289	-1.86432	3.86452	0.000263747	0.144127
ENST00000469073	1.47054	0.870484	3.86338	0.000264747	0.144127
ENST00000591566	1.2688	1.62373	3.85982	0.000267879	0.144812
ENST00000296161	1.81193	2.63736	3.85475	0.00027242	0.146244
ENST00000439835	1.84905	-1.57845	3.84773	0.000278814	0.148644
ENST00000299084	0.601929	6.25844	3.84466	0.000281659	0.149133
ENST00000415861	0.819448	4.33489	3.83091	0.000294738	0.154996
ENST00000300527	1.84486	0.0542192	3.81971	0.000305821	0.158758
ENST00000307358	1.78959	-0.944686	3.81953	0.000305998	0.158758
ENST00000385269	-1.65886	1.24793	-3.81822	0.000310403	0.159377
ENST00000455608	1.70117	-1.95432	3.8143	0.000311315	0.159377
ENST00000545851	1.45941	1.32926	3.80629	0.000319628	0.162556
ENST00000341375	1.50604	-0.590811	3.8046	0.000322658	0.162938
ENST00000514057	1.66279	5.8628	3.80121	0.000325	0.162938
ENST00000371806	2.25575	-0.1657	3.79962	0.000326703	0.162938
ENST00000637105	-0.834276	5.58359	-3.79412	0.000332653	0.163427
ENST00000470226	1.88564	-1.53343	3.79151	0.000335514	0.163427
ENST00000567947	1.50356	0.0432018	3.7989	0.000337349	0.163427
ENST00000248071	2.14741	2.18107	3.78979	0.000337416	0.163427
ENST00000591814	1.60099	-1.22953	3.78903	0.000338254	0.163427
ENST00000425669	0.56849	4.86006	3.77756	0.000351245	0.16758
ENST00000303004	1.18689	4.09486	3.77586	0.000353177	0.16758
ENST00000531445	-0.86028	7.32427	-3.77562	0.000353453	0.16758
ENST00000364830	-1.05763	5.16393	-3.77498	0.00035552	0.16758
ENST00000276914	1.64125	0.451703	3.79127	0.000360928	0.168624
ENST00000624175	1.84174	-1.05876	3.76823	0.000362097	0.168624
ENST00000538168	-0.738317	7.17789	-3.76662	0.000366876	0.169826
ENST00000256951	1.90816	1.29052	3.75683	0.000375836	0.170849
ENST00000495487	-0.999403	2.55566	-3.75582	0.000377444	0.170849
ENST00000456687	1.79319	-1.55874	3.75407	0.000379233	0.170849
ENST00000490345	-1.52789	-1.18549	-3.75382	0.000379552	0.170849
ENST00000361567	1.50489	9.89731	3.75335	0.000380136	0.170849
ENST00000563002	1.80178	-1.43442	3.74767	0.000387238	0.172344
ENST00000264170	1.92657	0.319115	3.74428	0.00039154	0.172344
ENST00000481132	1.75825	1.01795	3.74286	0.000393359	0.172344
ENST00000466165	1.45056	0.611633	3.74203	0.000394416	0.172344
ENST00000273062	1.31459	1.56965	3.74105	0.000395677	0.172344
ENST00000294618	1.42686	2.15358	3.74818	0.000396839	0.172344
ENST00000542575	1.83562	-0.410179	3.73655	0.000401523	0.172729
ENST00000311852	1.78624	1.16193	3.73604	0.000402194	0.172729
ENST00000302236	1.53745	0.651037	3.73142	0.000408281	0.174374
ENST00000308064	-0.807556	5.73618	-3.7268	0.000416587	0.175665
ENST00000237853	0.729696	5.56738	3.72498	0.000416922	0.175665
ENST00000258534	1.45551	1.47647	3.72391	0.00041837	0.175665
ENST00000414222	-1.94518	1.107	-3.72196	0.000422409	0.175665
ENST00000394957	1.97046	1.9006	3.72916	0.000425554	0.175665
ENST00000413611	1.5892	1.06751	3.71812	0.000426308	0.175665
ENST00000400256	1.77749	-0.232555	3.72124	0.000428717	0.175665
ENST00000288840	1.90704	0.489614	3.71584	0.000429483	0.175665
ENST00000591365	-0.8439	5.10759	-3.71331	0.000433015	0.176178
ENST00000488036	1.85981	-0.313335	3.7083	0.000440672	0.177701
ENST00000356713	-0.505366	8.01587	-3.70716	0.000441742	0.177701
ENST00000586052	1.55667	-1.58225	3.7051	0.000444695	0.177701
ENST00000474768	1.54141	1.71134	3.70669	0.000446243	0.177701
ENST00000476899	-1.63438	0.951691	-3.70264	0.000448252	0.177701
ENST00000610286	-1.33231	2.88882	-3.69964	0.000454151	0.1782
ENST00000557493	1.62562	-0.261683	3.69851	0.000455556	0.1782
ENST00000361228	1.98677	-0.744693	3.69706	0.000456426	0.1782
ENST00000556475	-1.26164	3.56876	-3.69627	0.000460197	0.178769
ENST00000529093	-1.7257	-0.85856	-3.68825	0.000472879	0.182777
ENST00000591459	1.613	2.67399	3.68392	0.000476247	0.183163
ENST00000361453	1.51154	8.68302	3.67904	0.000483796	0.185146
ENST00000463990	1.77428	-2.10938	3.67335	0.000492774	0.187652
ENST00000497604	-0.816059	4.46041	-3.67009	0.000500137	0.189522
ENST00000569490	2.06074	-1.33038	3.66718	0.000504287	0.190163
ENST00000378024	1.55657	7.00751	3.66586	0.000510168	0.190636
ENST00000372476	1.57883	-0.151244	3.68772	0.000512464	0.190636
ENST00000648162	1.70068	-0.357092	3.65942	0.000515574	0.190636
ENST00000310624	-1.36186	8.54051	-3.66051	0.000518022	0.190636
ENST00000461790	1.90332	-0.233873	3.65447	0.000523653	0.190636
ENST00000490362	1.59861	-0.490396	3.65406	0.000524535	0.190636
ENST00000583027	-1.46046	-0.982467	-3.65395	0.000524546	0.190636
ENST00000478587	1.49118	-1.82037	3.6534	0.000525462	0.190636
ENST00000651400	1.6706	-0.878736	3.65134	0.000528961	0.190636
ENST00000456554	-1.24627	4.33368	-3.6499	0.000531416	0.190636
ENST00000537720	-1.07846	3.54637	-3.64806	0.000534563	0.190636
ENST00000393264	1.84012	-0.160871	3.64773	0.000535134	0.190636
ENST00000240499	0.474759	7.20702	3.64658	0.000538071	0.190803
ENST00000486511	-1.58187	0.756933	-3.64173	0.000545548	0.190941
ENST00000604401	-0.768963	3.70385	-3.64163	0.000545723	0.190941
ENST00000463067	-0.692532	4.79312	-3.6414	0.000546151	0.190941
ENST00000473775	1.60675	-1.24615	3.63985	0.00055034	0.190941
ENST00000490728	-1.16668	3.75308	-3.63874	0.00055081	0.190941
ENST00000436407	1.86702	-1.01318	3.63496	0.00055752	0.192058
ENST00000329454	2.23262	0.68188	3.62823	0.000569687	0.192058
ENST00000540600	-1.90044	0.468326	-3.63052	0.000569838	0.192058
ENST00000361739	1.20809	9.39875	3.62631	0.000573202	0.192058
ENST00000356297	-0.880379	4.13906	-3.62646	0.000575877	0.192058
ENST00000563209	-0.83189	5.59427	-3.62469	0.000576173	0.192058
ENST00000368586	-0.885924	7.48389	-3.62351	0.00057835	0.192058
ENST00000564549	-1.29797	2.34896	-3.6238	0.000582093	0.192058
ENST00000508630	1.71212	-0.701751	3.62045	0.000584054	0.192058
ENST00000608559	-1.80331	-0.0833465	-3.62159	0.000586376	0.192058
ENST00000542713	1.64711	2.79803	3.62646	0.000587596	0.192058
ENST00000522488	-1.4174	-0.904002	-3.61975	0.000588944	0.192058
ENST00000601806	1.72303	-1.28551	3.61734	0.000589976	0.192058
ENST00000237512	-1.1679	1.84017	-3.61618	0.000592075	0.192058
ENST00000519177	1.76241	-0.700122	3.61569	0.000593013	0.192058
ENST00000638012	-0.864122	5.7328	-3.61717	0.000593784	0.192058
ENST00000479620	-1.49209	1.32465	-3.61227	0.000599662	0.192181
ENST00000286713	0.954311	3.32957	3.6118	0.000600438	0.192181
ENST00000566895	1.23406	1.07429	3.61118	0.000601621	0.192181
ENST00000361381	1.48005	10.0376	3.60816	0.000607463	0.192817
ENST00000466223	-1.87854	0.960876	-3.60481	0.000613995	0.192817
ENST00000563787	1.87783	-0.561382	3.60383	0.000615916	0.192817
ENST00000361227	1.36774	5.45758	3.6034	0.000616759	0.192817
ENST00000289703	-1.39825	-1.10454	-3.60242	0.000618827	0.192817
ENST00000513926	1.59858	-0.736094	3.60219	0.000619147	0.192817
ENST00000492816	2.06868	0.773764	3.60121	0.000621072	0.192817
ENST00000251472	-0.626267	7.57508	-3.59803	0.000627406	0.193653
ENST00000491821	1.54366	-1.29912	3.59622	0.000631039	0.193653
ENST00000355594	-1.45052	1.15461	-3.59716	0.000633008	0.193653
ENST00000368738	2.07804	-1.17603	3.59557	0.000634293	0.193653
ENST00000523115	1.53138	-1.67888	3.5928	0.000637962	0.193653
ENST00000638421	1.68561	-0.89827	3.592	0.000641271	0.193653
ENST00000223095	1.88807	0.626391	3.59955	0.000641301	0.193653
ENST00000281806	-1.4902	-1.16824	-3.58719	0.000649463	0.194632
ENST00000582124	1.69583	-1.66383	3.58669	0.000650491	0.194632
ENST00000590400	1.46079	-0.594589	3.58592	0.000652096	0.194632
ENST00000534407	1.98116	-0.206477	3.58321	0.000657737	0.195029
ENST00000367755	1.61944	-1.80506	3.58286	0.000658472	0.195029
ENST00000220592	0.390727	8.1193	3.57173	0.000682188	0.201282
ENST00000406721	1.52152	-1.99515	3.56887	0.000688414	0.202262
ENST00000355155	1.49097	0.158524	3.56781	0.000690743	0.202262
ENST00000446847	1.42364	0.823667	3.56492	0.0006971	0.202512
ENST00000537171	-1.38958	1.52926	-3.56403	0.000699176	0.202512
ENST00000377989	1.71022	-0.985991	3.56037	0.000707239	0.202512
ENST00000455531	-0.717424	4.67777	-3.56032	0.000707338	0.202512
ENST00000566281	1.4926	-0.301255	3.57137	0.000708015	0.202512
ENST00000377214	1.48859	-1.94446	3.55869	0.000711019	0.202512
ENST00000609190	1.27004	1.50572	3.56256	0.000716687	0.202512
ENST00000294947	1.55258	-0.181963	3.55547	0.0007183	0.202512
ENST00000527748	-0.699894	4.74093	-3.55642	0.000719485	0.202512
ENST00000600463	1.93907	-0.0234913	3.55461	0.000720257	0.202512
ENST00000554336	-1.73066	0.379733	-3.55395	0.00072177	0.202512
ENST00000514100	-1.40106	1.78984	-3.55311	0.000723686	0.202512
ENST00000523676	-1.1046	1.95665	-3.55406	0.000725651	0.202512
ENST00000454584	-1.40932	2.1923	-3.5475	0.000736664	0.204162
ENST00000330964	0.773733	3.41544	3.54742	0.000736848	0.204162
ENST00000481559	-1.60319	-0.116202	-3.54394	0.000745121	0.205717
ENST00000428457	1.08482	1.9712	3.54018	0.000753911	0.207403
ENST00000615595	-1.7235	-0.648041	-3.53623	0.000764884	0.209676
ENST00000625078	1.86651	0.497866	3.53275	0.000771819	0.210829
ENST00000579611	1.42524	-1.89083	3.53161	0.000775628	0.211124
ENST00000618776	1.60022	2.51525	3.52969	0.000780915	0.211817
ENST00000515888	-1.41944	1.26161	-3.52572	0.000790685	0.213572
ENST00000498160	1.40045	-1.67217	3.52416	0.000793025	0.213572
ENST00000541424	-0.61147	5.94122	-3.5231	0.000795674	0.213572
ENST00000492299	-1.09106	3.5557	-3.52132	0.000803114	0.214823
ENST00000463680	-1.39287	-0.253669	-3.52034	0.000808037	0.215395
ENST00000522121	-1.47253	0.796372	-3.51664	0.000812469	0.21577
ENST00000366956	1.10453	2.71657	3.5182	0.000815028	0.21577
ENST00000372582	-1.42177	4.2565	-3.51472	0.000821885	0.2168
ENST00000457665	1.00405	2.30946	3.51462	0.000824527	0.2168
ENST00000505061	-1.40776	1.46014	-3.50785	0.000834924	0.218214
ENST00000466465	1.73414	-0.366154	3.50694	0.000837205	0.218214
ENST00000405705	-1.2609	1.47376	-3.50778	0.000838372	0.218214
ENST00000368599	1.38708	1.55785	3.51786	0.00084254	0.218563
ENST00000456355	1.80754	-1.07489	3.50591	0.000847026	0.218992
ENST00000392432	-1.45816	0.23986	-3.49909	0.000858705	0.220634
ENST00000499638	1.59752	-0.230477	3.49872	0.000859088	0.220634
ENST00000481558	-1.46837	1.40238	-3.49591	0.000866722	0.221858
ENST00000472247	1.21673	0.590841	3.49337	0.000873638	0.222238
ENST00000462451	1.43551	-2.07009	3.49326	0.000873957	0.222238
ENST00000280706	-1.65391	-0.143906	-3.49013	0.000882584	0.222726
ENST00000464039	1.22208	1.04325	3.50852	0.00088332	0.222726
ENST00000441435	1.56988	-0.688088	3.4892	0.000885162	0.222726
ENST00000560223	1.59923	-1.10642	3.48812	0.00088815	0.222726
ENST00000421735	1.78137	-1.26766	3.49289	0.000890282	0.222726
ENST00000504767	1.48196	-1.00644	3.48344	0.000901258	0.224745
ENST00000528790	1.89668	0.501767	3.47998	0.000911102	0.225576
ENST00000393409	-0.657786	8.82222	-3.48057	0.000913549	0.225576
ENST00000470269	1.02278	2.50814	3.47795	0.000916906	0.225576
ENST00000619230	-0.700203	4.94491	-3.47905	0.000918896	0.225576
ENST00000511380	-0.710087	5.22763	-3.47684	0.000920104	0.225576
ENST00000005178	1.80662	0.365824	3.4862	0.0009221	0.225576
ENST00000602957	-1.45634	-0.613036	-3.47041	0.00093877	0.227725
ENST00000412514	1.26123	0.99775	3.47062	0.000939039	0.227725
ENST00000562045	-0.964291	4.03977	-3.47014	0.000939941	0.227725
ENST00000550014	-1.34235	-1.07919	-3.46937	0.000942669	0.227725
ENST00000476324	1.66847	0.497023	3.4656	0.000953006	0.228161
ENST00000553465	-0.772443	6.1401	-3.4646	0.000958664	0.228161
ENST00000361335	1.47547	6.90092	3.46303	0.000960674	0.228161
ENST00000550663	-1.389	-1.06117	-3.46743	0.00096089	0.228161
ENST00000636594	1.47158	-2.09886	3.46357	0.00096202	0.228161
ENST00000442197	-0.890596	4.9207	-3.46298	0.000964547	0.228161
ENST00000586975	-1.27898	0.784901	-3.46138	0.000965622	0.228161
ENST00000634836	1.73267	-0.471731	3.46015	0.000969332	0.228161
ENST00000315713	1.62715	0.163453	3.4612	0.000971038	0.228161
ENST00000617932	1.05769	2.39122	3.45446	0.000988333	0.230455
ENST00000526612	1.51521	-1.82693	3.45329	0.000990295	0.230455
ENST00000282111	0.995532	2.92242	3.4526	0.000992429	0.230455
ENST00000619757	1.18073	2.3269	3.45251	0.000992725	0.230455
ENST00000443633	-1.2573	3.04346	-3.45191	0.000999507	0.231335
ENST00000584323	1.468	-0.71784	3.44883	0.00100416	0.231702
ENST00000553939	1.53087	-1.78919	3.44547	0.00101483	0.231702
ENST00000369016	1.38407	0.827377	3.44476	0.0010224	0.231702
ENST00000310078	0.513075	6.49681	3.44398	0.00102328	0.231702
ENST00000244869	1.84165	-1.72485	3.44093	0.00102918	0.231702
ENST00000361624	1.27242	11.2665	3.47131	0.0010292	0.231702
ENST00000486814	-1.07174	2.94875	-3.43997	0.00103223	0.231702
ENST00000469646	1.20213	0.856718	3.43982	0.00103274	0.231702
ENST00000557729	-2.3846	1.58043	-3.44045	0.0010337	0.231702
ENST00000513518	1.35656	-1.25514	3.43815	0.0010381	0.231702
ENST00000489461	-1.32066	1.37036	-3.43774	0.00104032	0.231702
ENST00000612016	1.87392	-1.27337	3.43726	0.00104096	0.231702
ENST00000638588	-1.16097	2.85167	-3.43454	0.00105066	0.231702
ENST00000632133	1.17501	2.67333	3.43344	0.00105342	0.231702
ENST00000482481	0.73507	5.0614	3.4326	0.00105617	0.231702
ENST00000559795	1.67195	-1.48827	3.43291	0.00105798	0.231702
ENST00000260526	0.666862	4.91351	3.43181	0.00105876	0.231702
ENST00000563240	-0.849328	6.27031	-3.43162	0.00105939	0.231702
ENST00000380430	-1.451	0.356831	-3.43164	0.00106579	0.231702
ENST00000519028	1.60032	-1.03708	3.42839	0.00107007	0.231702
ENST00000510003	-1.35716	0.617489	-3.42973	0.00107046	0.231702
ENST00000271638	1.59864	-1.81222	3.42815	0.00107085	0.231702
ENST00000364455	1.94342	0.818987	3.42927	0.00107284	0.231702
ENST00000438934	-0.78822	6.59604	-3.42817	0.00107303	0.231702
ENST00000566278	1.48069	-0.590918	3.42606	0.00107782	0.232089
ENST00000382031	-1.24901	4.88169	-3.42482	0.00108789	0.233121
ENST00000511006	0.81493	2.9505	3.44304	0.00108864	0.233121
ENST00000318442	1.81128	1.87215	3.42165	0.00109268	0.233339
ENST00000612677	1.60529	-1.29341	3.42041	0.00109689	0.233353
ENST00000425156	1.66063	-0.91782	3.42547	0.00109878	0.233353
ENST00000394085	0.769202	2.61061	3.41839	0.00110378	0.233771
ENST00000384287	-0.752811	5.35715	-3.41544	0.00111886	0.234595
ENST00000414573	-1.7708	-0.384347	-3.41383	0.00111947	0.234595
ENST00000534517	1.36837	-1.81472	3.41285	0.00112403	0.234595
ENST00000511377	-1.30909	0.308821	-3.41192	0.00112612	0.234595
ENST00000523936	-1.24441	-1.12676	-3.41152	0.00112751	0.234595
ENST00000463719	1.77698	1.25697	3.41149	0.00113243	0.234595
ENST00000473146	1.74108	-1.28813	3.40844	0.00113833	0.234595
ENST00000415611	1.72781	-1.43859	3.40758	0.00114134	0.234595
ENST00000563687	1.64661	-1.5536	3.40727	0.00114244	0.234595
ENST00000467998	-1.51125	0.159638	-3.40676	0.00114423	0.234595
ENST00000458420	-0.900215	7.87236	-3.40874	0.00114478	0.234595
ENST00000613925	0.947538	1.85009	3.40626	0.00114602	0.234595
ENST00000647307	-1.45809	1.23194	-3.40696	0.00115023	0.234595
ENST00000557989	-1.54011	0.477725	-3.40392	0.00115434	0.234595
ENST00000379433	1.17333	2.37899	3.40374	0.00115506	0.234595
ENST00000324288	1.47452	2.91866	3.40339	0.00115622	0.234595
ENST00000508554	1.4319	-0.277964	3.40238	0.00115983	0.234711
ENST00000488681	-1.37308	-0.179162	-3.39923	0.00117203	0.235243
ENST00000362135	-0.728992	4.34467	-3.40048	0.00117375	0.235243
ENST00000222693	1.51892	0.455334	3.40978	0.00117459	0.235243
ENST00000421841	1.51564	-1.52862	3.39828	0.00117463	0.235243
ENST00000333643	-1.22193	2.77924	-3.39675	0.00118018	0.235743
ENST00000381989	1.10448	5.04362	3.43948	0.00118803	0.236266
ENST00000445535	2.81249	1.63012	3.3926	0.00119541	0.236266
ENST00000362079	1.19263	8.73356	3.39194	0.00119784	0.236266
ENST00000373313	1.5255	3.22446	3.39059	0.00120284	0.236266
ENST00000473258	2.00006	-0.0339672	3.39024	0.00120415	0.236266
ENST00000431737	1.51718	-1.92618	3.38971	0.00120642	0.236266
ENST00000647943	-0.910957	3.6336	-3.39116	0.00120802	0.236266
ENST00000440984	1.26877	-0.414576	3.3887	0.00120989	0.236266
ENST00000555058	1.44718	-1.89717	3.38849	0.00121167	0.236266
ENST00000463497	0.7751	4.04753	3.3873	0.00121511	0.236266
ENST00000514160	-1.21096	2.03878	-3.38695	0.00121642	0.236266
ENST00000645147	1.39004	-1.45745	3.38549	0.0012219	0.236736
ENST00000482467	-1.31519	0.95542	-3.38373	0.00122874	0.237117
ENST00000479831	-1.35005	0.849927	-3.38484	0.00123071	0.237117
ENST00000468878	-1.07756	2.81932	-3.38216	0.00123519	0.237117
ENST00000425673	1.16915	1.88782	3.38616	0.00124002	0.237117
ENST00000562869	1.58768	-0.107555	3.38055	0.00124064	0.237117
ENST00000384868	-1.18327	1.76148	-3.38077	0.00124252	0.237117
ENST00000504669	1.71591	-0.213918	3.37933	0.00124533	0.237117
ENST00000481539	1.72943	-0.428559	3.37665	0.0012558	0.237783
ENST00000260702	1.61202	1.67936	3.37594	0.00125864	0.237783
ENST00000507668	0.617872	6.45416	3.37244	0.00127201	0.237783
ENST00000432195	1.76233	-1.16376	3.37978	0.00127375	0.237783
ENST00000636782	-1.40352	1.25255	-3.3719	0.00127414	0.237783
ENST00000445733	1.56049	-1.015	3.37127	0.00127658	0.237783
ENST00000488431	1.5115	-2.01225	3.37086	0.00127821	0.237783
ENST00000468399	1.03965	2.40762	3.3713	0.00128094	0.237783
ENST00000462196	1.57412	-1.56898	3.36656	0.00129522	0.237783
ENST00000552227	-0.920358	3.04513	-3.36737	0.00129567	0.237783
ENST00000329966	-1.3621	-0.446901	-3.3675	0.0012989	0.237783
ENST00000478440	1.52997	-1.81366	3.36549	0.00130006	0.237783
ENST00000556120	1.53909	-1.68078	3.36515	0.00130083	0.237783
ENST00000414583	1.89321	-0.554544	3.38659	0.00130787	0.237783
ENST00000389672	-1.19072	2.77084	-3.36347	0.00130951	0.237783
ENST00000563939	1.00676	2.3465	3.3626	0.00131107	0.237783
ENST00000614709	-1.12982	4.26591	-3.36191	0.00131382	0.237783
ENST00000589985	-0.778831	7.92155	-3.36115	0.0013169	0.237783
ENST00000307271	1.75056	2.14535	3.36063	0.00131899	0.237783
ENST00000291775	1.55058	-0.873069	3.36083	0.00132016	0.237783
ENST00000223357	1.50586	0.955553	3.35973	0.00132265	0.237783
ENST00000611033	-1.37002	1.82976	-3.35943	0.00132386	0.237783
ENST00000515221	-1.22983	0.841805	-3.35928	0.0013267	0.237783
ENST00000557024	1.38655	-2.06244	3.35766	0.00133108	0.237783
ENST00000238667	1.84909	1.31206	3.35681	0.00133457	0.237783
ENST00000227471	1.5767	-0.233149	3.35672	0.00133494	0.237783
ENST00000544220	1.2244	1.20893	3.37291	0.00133917	0.237783
ENST00000602315	1.76323	1.17707	3.35513	0.00134146	0.237783
ENST00000308527	0.8146	3.54869	3.35497	0.00134217	0.237783
ENST00000545837	1.51043	0.98773	3.35421	0.00134525	0.237783
ENST00000412504	-1.59649	-1.06093	-3.35434	0.00134566	0.237783
ENST00000421686	-0.787897	4.70374	-3.35304	0.0013515	0.237783
ENST00000591563	1.49411	-0.0609829	3.35171	0.0013556	0.237783
ENST00000366481	-0.848286	5.78492	-3.34973	0.00136395	0.237783
ENST00000473116	1.48564	-1.12716	3.34894	0.00136713	0.237783
ENST00000588696	1.38736	-1.07104	3.34739	0.00137363	0.237783
ENST00000456101	-1.21277	2.5257	-3.34721	0.00137439	0.237783
ENST00000356892	1.85929	0.452661	3.37095	0.00137662	0.237783
ENST00000330871	1.58524	1.3447	3.34544	0.00138188	0.237783
ENST00000256015	0.742521	4.57237	3.34477	0.00138472	0.237783
ENST00000292524	0.774382	2.57115	3.34748	0.00138534	0.237783
ENST00000586408	-1.54676	0.736025	-3.34349	0.00139014	0.237783
ENST00000523122	-1.5681	0.779741	-3.34273	0.00139411	0.237783
ENST00000463156	0.679371	4.37341	3.3424	0.0013948	0.237783
ENST00000327858	1.97422	0.230703	3.34252	0.00139494	0.237783
ENST00000601528	-0.850863	4.0073	-3.34233	0.00139507	0.237783
ENST00000361539	-0.554983	6.45805	-3.34189	0.00139738	0.237783
ENST00000322563	-1.32409	1.92757	-3.34209	0.00140276	0.237783
ENST00000429967	1.15213	2.28768	3.33998	0.00140514	0.237783
ENST00000415215	1.49086	-0.553521	3.33984	0.00140574	0.237783
ENST00000367175	-0.581394	5.88685	-3.33934	0.0014079	0.237783
ENST00000563116	1.42039	-1.77117	3.33914	0.00140878	0.237783
ENST00000513882	1.60691	-1.47424	3.33677	0.00141901	0.238543
ENST00000463471	1.62013	-0.283521	3.3362	0.00142147	0.238543
ENST00000636668	1.78196	-1.125	3.33596	0.00142254	0.238543
ENST00000281830	1.15751	2.86257	3.33458	0.00142856	0.238656
ENST00000478713	1.38641	0.164598	3.33924	0.00142939	0.238656
ENST00000483199	1.38063	-0.479312	3.32926	0.00145195	0.2419
ENST00000554577	1.91779	-0.886695	3.32762	0.00145925	0.242593
ENST00000548660	-0.799464	3.45121	-3.32556	0.00146844	0.243597
ENST00000518659	-0.946367	5.23587	-3.32492	0.00147434	0.24402
ENST00000612582	0.810503	4.56572	3.33037	0.00147915	0.24402
ENST00000257290	1.57586	1.89719	3.32867	0.00148173	0.24402
ENST00000640161	-1.18034	4.00379	-3.32377	0.00148362	0.24402
ENST00000618518	-1.39887	0.0243066	-3.32051	0.00149167	0.244146
ENST00000377126	0.640083	6.53885	3.32027	0.0014923	0.244146
ENST00000559937	1.47654	0.519287	3.32139	0.00149426	0.244146
ENST00000624581	1.1955	2.53941	3.31924	0.00149701	0.244146
ENST00000636391	-0.655923	6.39151	-3.31808	0.00150328	0.244524
ENST00000360270	1.24892	5.52485	3.32472	0.00150566	0.244524
ENST00000266086	1.4259	3.09597	3.31656	0.00152426	0.246739
ENST00000611654	1.52527	-1.28727	3.31251	0.00152802	0.246739
ENST00000469435	0.733054	3.22641	3.31266	0.00152977	0.246739
ENST00000483844	-1.47347	-0.577651	-3.31164	0.00153206	0.246739
ENST00000551354	1.785	0.31149	3.32494	0.00153621	0.246893
ENST00000250559	0.712145	4.08539	3.31006	0.00154017	0.246947
ENST00000416931	3.2379	0.156267	3.30931	0.00154294	0.246947
ENST00000434733	-1.28374	-1.53077	-3.30954	0.00154791	0.24723
ENST00000437864	1.53003	-1.06376	3.30621	0.00155757	0.248261
ENST00000523118	-1.42526	2.21199	-3.30446	0.00156922	0.249603
ENST00000374519	1.08878	1.26343	3.30231	0.00157613	0.24979
ENST00000486901	1.31977	-1.73797	3.30218	0.00157686	0.24979
ENST00000521370	1.61937	-1.29075	3.30636	0.00158522	0.250097
ENST00000390708	-0.968985	3.04537	-3.30041	0.00158527	0.250097
ENST00000458961	-1.30797	1.33668	-3.29976	0.00159367	0.250911
ENST00000377067	-1.2261	6.39594	-3.29558	0.00161254	0.252557
ENST00000471212	1.32084	-1.0022	3.2947	0.00161298	0.252557
ENST00000367568	1.98717	-0.19013	3.29451	0.00161393	0.252557
ENST00000471717	1.47716	-0.316699	3.29439	0.00162378	0.253586
ENST00000546049	-1.52027	-0.26855	-3.29103	0.00163106	0.254208
ENST00000494234	-1.22951	-0.964679	-3.28888	0.00164172	0.255355
ENST00000642389	0.57838	3.94378	3.28774	0.00164737	0.25572
ENST00000272928	1.53273	0.137835	3.28551	0.00165856	0.256055
ENST00000410411	-1.42948	1.89465	-3.28673	0.00166184	0.256055
ENST00000463191	1.38696	-2.13528	3.28471	0.00166257	0.256055
ENST00000550917	0.73667	3.58194	3.28671	0.00166381	0.256055
ENST00000396721	-1.66097	0.142993	-3.28596	0.0016661	0.256055
ENST00000461436	0.840329	2.66209	3.28241	0.00167422	0.256329
ENST00000535812	1.0436	2.12566	3.28129	0.00167991	0.256329
ENST00000244043	1.24878	2.56522	3.28127	0.00167998	0.256329
ENST00000381998	1.66818	-1.29647	3.28056	0.0016836	0.256329
ENST00000409032	-0.800701	3.80689	-3.28033	0.00168478	0.256329
ENST00000508851	1.37717	-0.194848	3.27974	0.00168777	0.256329
ENST00000479109	1.63832	0.0295946	3.28186	0.00169488	0.25655
ENST00000357085	1.85077	2.50103	3.27863	0.00169867	0.25655
ENST00000555700	1.54739	-1.18866	3.28066	0.00169918	0.25655
ENST00000321300	1.27812	0.850336	3.27646	0.00170462	0.256596
ENST00000496149	-1.20308	1.74852	-3.27617	0.00170613	0.256596
ENST00000565951	1.40663	-0.224801	3.27469	0.00171376	0.25707
ENST00000458332	1.53821	-0.489902	3.27377	0.00171853	0.25707
ENST00000539687	1.61538	-0.920793	3.28142	0.00171925	0.25707
ENST00000430088	-1.19176	-1.63259	-3.27038	0.00173935	0.25824
ENST00000579189	-1.39653	-0.861311	-3.26947	0.00174205	0.25824
ENST00000580476	-1.46671	10.7072	-3.26913	0.00175233	0.25824
ENST00000462567	1.23958	-2.15875	3.26676	0.00175531	0.25824
ENST00000597928	1.58336	-1.17434	3.26663	0.00175605	0.25824
ENST00000416430	-1.2481	2.28516	-3.26773	0.0017563	0.25824
ENST00000482299	-1.33839	0.325327	-3.26692	0.00175631	0.25824
ENST00000272852	-0.794682	4.71835	-3.26647	0.00175686	0.25824
ENST00000604000	0.508708	4.73644	3.26501	0.00176852	0.25824
ENST00000553421	-0.674073	5.2582	-3.26517	0.00177263	0.25824
ENST00000398460	-0.621009	9.9742	-3.26167	0.00178252	0.25824
ENST00000379561	0.85427	4.63537	3.26177	0.00178287	0.25824
ENST00000328252	-0.892913	5.32303	-3.26313	0.00178306	0.25824
ENST00000609119	-1.30404	1.44971	-3.26106	0.00178579	0.25824
ENST00000254810	0.689893	4.32091	3.26096	0.00178631	0.25824
ENST00000596411	-0.71853	3.73923	-3.26089	0.00178671	0.25824
ENST00000491330	1.51201	-1.78002	3.26065	0.00178874	0.25824
ENST00000588552	-0.725753	5.09826	-3.26028	0.00178998	0.25824
ENST00000559647	1.41217	-1.62791	3.26017	0.00179058	0.25824
ENST00000362583	-0.928604	4.30435	-3.25942	0.00179462	0.25824
ENST00000624769	1.60099	0.476201	3.27089	0.00179723	0.25824
ENST00000270349	-2.33713	5.48076	-3.25781	0.00181179	0.259849
ENST00000616257	-1.49642	0.338577	-3.25475	0.00182443	0.260664
ENST00000275493	1.23711	3.54482	3.25391	0.00182475	0.260664
ENST00000593586	-0.916945	4.06862	-3.25264	0.00183171	0.260664
ENST00000316491	0.790596	2.56558	3.25201	0.00183519	0.260664
ENST00000619635	-0.881963	6.49847	-3.25168	0.00183699	0.260664
ENST00000361752	1.18401	4.98231	3.25155	0.00183771	0.260664
ENST00000603245	-1.37511	1.15065	-3.24908	0.00185142	0.260917
ENST00000565555	-1.01471	3.07466	-3.24897	0.00185203	0.260917
ENST00000532673	-1.30667	0.984714	-3.2504	0.00185413	0.260917
ENST00000324093	1.30773	3.52677	3.26785	0.00185534	0.260917
ENST00000365504	-0.890054	2.8113	-3.24865	0.00185636	0.260917
ENST00000624986	1.10196	2.0722	3.25735	0.00186505	0.261662
ENST00000412268	1.44169	-1.99574	3.24518	0.00187328	0.26234
ENST00000485341	1.37081	-1.74011	3.24647	0.00188212	0.263103
ENST00000238831	0.364263	7.35479	3.24414	0.00188868	0.263535
ENST00000437610	-1.40438	0.465119	-3.24358	0.00189204	0.263535
ENST00000321725	2.01235	2.53716	3.2406	0.00189927	0.264066
ENST00000525222	-0.76211	3.74227	-3.23922	0.00190713	0.264505
ENST00000539966	0.599766	3.51753	3.23827	0.00191263	0.264505
ENST00000493171	1.44223	-0.151541	3.23826	0.00191269	0.264505
ENST00000567334	-1.70444	-0.203172	-3.2378	0.0019165	0.264556
ENST00000556754	1.33048	0.938681	3.237	0.0019199	0.264556
ENST00000487975	1.64409	-1.11133	3.23528	0.00192983	0.265451
ENST00000543363	0.913953	2.54841	3.23438	0.00193508	0.265634
ENST00000309295	0.885206	3.26734	3.23353	0.00194002	0.265634
ENST00000650933	1.46491	-0.28306	3.2332	0.00194192	0.265634
ENST00000483254	-1.45994	-0.182312	-3.23245	0.00194633	0.265634
ENST00000571644	1.72635	-0.133205	3.2321	0.00194834	0.265634
ENST00000479621	-0.762904	4.72033	-3.23074	0.00195633	0.266254
ENST00000509550	-0.673064	5.01733	-3.23176	0.00196018	0.266309
ENST00000504959	-1.10541	1.80981	-3.2289	0.0019735	0.266389
ENST00000624585	1.63652	0.241541	3.22775	0.00197394	0.266389
ENST00000485737	1.01191	1.38261	3.22622	0.00198384	0.266389
ENST00000432564	1.69335	-0.752701	3.23772	0.0019905	0.266389
ENST00000647584	1.27303	0.732463	3.22486	0.00199116	0.266389
ENST00000529941	1.55623	-1.00922	3.22461	0.00199261	0.266389
ENST00000567638	1.01365	0.765762	3.2243	0.00199499	0.266389
ENST00000266085	0.955214	5.78593	3.22352	0.00199922	0.266389
ENST00000531530	1.62635	0.282316	3.22329	0.0020005	0.266389
ENST00000362520	-0.848956	4.52507	-3.2243	0.00200451	0.266389
ENST00000497192	1.02757	2.12403	3.22185	0.00200918	0.266389
ENST00000545399	-1.6941	1.35423	-3.22137	0.00201205	0.266389
ENST00000349155	1.65514	-0.569883	3.22118	0.00201319	0.266389
ENST00000223293	1.68932	-0.71271	3.22084	0.00201524	0.266389
ENST00000606888	-0.595164	5.03991	-3.22194	0.00201557	0.266389
ENST00000461872	-1.227	1.16522	-3.22238	0.0020159	0.266389
ENST00000427457	-1.40088	0.286457	-3.21845	0.00202969	0.266521
ENST00000629885	1.3347	-1.5612	3.21845	0.00202971	0.266521
ENST00000480542	1.57901	-1.3538	3.21787	0.00203322	0.266521
ENST00000649101	0.949024	3.8625	3.21802	0.00203346	0.266521
ENST00000591080	1.42043	-1.96897	3.21766	0.00203454	0.266521
ENST00000478482	-2.18404	0.955859	-3.21745	0.00204467	0.266521
ENST00000547912	-1.37825	-1.24614	-3.21675	0.00204796	0.266521
ENST00000494390	-0.785678	4.64421	-3.21484	0.00205178	0.266521
ENST00000503466	-1.18502	0.435434	-3.21587	0.00205716	0.266521
ENST00000423354	1.44873	-0.352939	3.21367	0.00205896	0.266521
ENST00000568686	-0.596442	9.0283	-3.21494	0.00206013	0.266521
ENST00000628166	-1.478	1.07088	-3.21343	0.00206041	0.266521
ENST00000361851	1.16711	7.37054	3.21322	0.00206173	0.266521
ENST00000469794	1.99052	-0.452704	3.21584	0.00206904	0.26702
ENST00000463422	1.47801	0.695399	3.20903	0.00208773	0.268006
ENST00000430515	-1.80862	0.257098	-3.20867	0.00208997	0.268006
ENST00000341259	0.747291	4.57419	3.20811	0.00209344	0.268006
ENST00000456689	-1.4631	0.142725	-3.2081	0.00209352	0.268006
ENST00000650632	-1.51387	-0.0751165	-3.20802	0.00209401	0.268006
ENST00000531571	-1.32339	1.06811	-3.20665	0.0021026	0.268167
ENST00000327987	-0.654845	4.26736	-3.2062	0.00210735	0.268167
ENST00000564347	-1.38086	1.10543	-3.20634	0.00210843	0.268167
ENST00000571246	1.37506	-0.110588	3.20615	0.00210915	0.268167
ENST00000642539	-1.23629	0.665921	-3.20401	0.00211925	0.268587
ENST00000579349	-1.32527	0.197915	-3.20333	0.00212521	0.268587
ENST00000620563	-1.33899	-1.2071	-3.20708	0.00212641	0.268587
ENST00000607844	1.3478	-1.7061	3.20272	0.00212742	0.268587
ENST00000356864	1.30951	-1.977	3.20234	0.00212983	0.268587
ENST00000425134	1.55524	-0.981971	3.21857	0.00213931	0.269089
ENST00000357721	0.841992	2.47612	3.2001	0.00214413	0.269089
ENST00000566117	1.756	-1.31262	3.205	0.00214726	0.269089
ENST00000511903	-1.51157	-1.47419	-3.19918	0.00215053	0.269089
ENST00000457719	-1.69083	1.06746	-3.19907	0.00215121	0.269089
ENST00000588155	-1.00106	2.85344	-3.19923	0.00215928	0.269132
ENST00000634452	-1.5232	1.21684	-3.19836	0.00216185	0.269132
ENST00000637827	-1.5815	0.677111	-3.19732	0.00216199	0.269132
ENST00000652628	1.49799	0.31992	3.19612	0.00217029	0.269677
ENST00000494227	-0.907331	3.05892	-3.19556	0.00217335	0.269677
ENST00000584498	-0.736321	3.38493	-3.1956	0.00217977	0.269778
ENST00000529690	-1.3597	0.112292	-3.19281	0.00219132	0.269778
ENST00000458739	1.34709	0.533492	3.19247	0.00219346	0.269778
ENST00000570396	1.30553	-2.09872	3.19164	0.00219888	0.269778
ENST00000473053	-1.68181	-0.018631	-3.19082	0.00220469	0.269778
ENST00000334705	0.860176	2.86072	3.19042	0.00220688	0.269778
ENST00000385226	-1.59593	1.87165	-3.19147	0.00220716	0.269778
ENST00000297316	1.57457	-0.415893	3.18952	0.00221285	0.269778
ENST00000455537	-0.382142	7.98888	-3.19086	0.00221547	0.269778
ENST00000568244	1.41898	-1.93968	3.18871	0.00221819	0.269778
ENST00000455214	1.32261	-1.90779	3.18827	0.00222107	0.269778
ENST00000599831	-1.2286	2.4171	-3.18799	0.00222289	0.269778
ENST00000380252	-1.37077	-1.62282	-3.18802	0.00222332	0.269778
ENST00000233813	1.10967	5.84815	3.18706	0.00222907	0.269778
ENST00000499685	1.44267	-0.695603	3.18693	0.00222996	0.269778
ENST00000466777	1.40763	-1.37257	3.18574	0.00223785	0.269778
ENST00000635641	1.6069	-1.69506	3.18542	0.00224019	0.269778
ENST00000573371	0.800637	2.63178	3.18439	0.00224685	0.269778
ENST00000382592	1.19986	3.89751	3.20148	0.00224903	0.269778
ENST00000286201	1.2581	1.12367	3.18564	0.00224955	0.269778
ENST00000544988	1.38783	-1.99523	3.18385	0.0022505	0.269778
ENST00000497793	1.42956	0.470133	3.18361	0.0022521	0.269778
ENST00000637605	-1.33808	0.748597	-3.18378	0.00225443	0.269778
ENST00000434835	0.814656	2.21455	3.18147	0.00226643	0.270469
ENST00000553042	1.25688	0.168275	3.18103	0.00226944	0.270469
ENST00000467903	2.38744	0.537948	3.18082	0.00227081	0.270469
ENST00000475475	-0.652504	4.4429	-3.17994	0.00227681	0.270469
ENST00000645182	1.59166	-0.270968	3.1798	0.0022777	0.270469
ENST00000441305	-1.38114	0.181356	-3.17865	0.00229115	0.271127
ENST00000307662	1.06247	2.28785	3.18895	0.00229294	0.271127
ENST00000525623	-1.3759	-1.45937	-3.17742	0.00229392	0.271127
ENST00000591226	0.751084	2.91341	3.19957	0.00230101	0.271127
ENST00000323469	-0.756576	5.45774	-3.17723	0.00230631	0.271127
ENST00000484724	1.57368	0.0771929	3.18784	0.00230703	0.271127
ENST00000307194	1.77043	0.0357146	3.17539	0.00230779	0.271127
ENST00000244534	1.62346	1.22067	3.17362	0.00231991	0.272008
ENST00000479540	1.55181	-0.651555	3.17284	0.00232534	0.272008
ENST00000430081	-1.66863	0.629754	-3.17192	0.00233674	0.272008
ENST00000473460	-1.37329	-0.788923	-3.17098	0.00233966	0.272008
ENST00000423060	1.30658	1.43086	3.17067	0.00234222	0.272008
ENST00000295927	-1.14797	1.84592	-3.17037	0.00234245	0.272008
ENST00000640631	-0.464129	9.22701	-3.17035	0.00234254	0.272008
ENST00000309237	-1.42737	0.505616	-3.17016	0.0023491	0.272008
ENST00000518014	1.86477	0.648076	3.16919	0.0023506	0.272008
ENST00000476047	-0.656035	7.34991	-3.16829	0.00235691	0.272008
ENST00000498148	-1.57515	0.594545	-3.16969	0.00235772	0.272008
ENST00000465803	-0.735575	4.50803	-3.16859	0.00235858	0.272008
ENST00000527043	-1.20498	1.45793	-3.1677	0.00236103	0.272008
ENST00000597914	1.31753	0.926646	3.16505	0.00237965	0.273158
ENST00000499291	-0.702721	5.4243	-3.16477	0.00238173	0.273158
ENST00000315576	1.69917	-0.00112808	3.16231	0.00239906	0.273158
ENST00000378679	1.23713	0.499115	3.16165	0.00240378	0.273158
ENST00000609796	1.48009	-1.29273	3.16163	0.00240388	0.273158
ENST00000395469	-1.51648	0.0227332	-3.16217	0.00240665	0.273158
ENST00000366697	-1.47422	1.41451	-3.16118	0.00240778	0.273158
ENST00000575332	0.988931	1.32531	3.16104	0.00240807	0.273158
ENST00000304760	1.67436	1.65315	3.1673	0.00240903	0.273158
ENST00000624347	-0.745975	4.90519	-3.16094	0.00241424	0.273158
ENST00000651593	-0.559445	5.48474	-3.16014	0.00241454	0.273158
ENST00000595886	1.98304	-0.906222	3.15997	0.00241573	0.273158
ENST00000553114	-1.37536	0.121272	-3.15978	0.00241712	0.273158
ENST00000434069	-1.14354	-1.38158	-3.15811	0.0024291	0.273158
ENST00000392314	-1.31924	-1.08012	-3.15785	0.00243094	0.273158
ENST00000558929	1.39916	1.51269	3.15834	0.00243123	0.273158
ENST00000563886	1.75934	-0.0544433	3.15775	0.00243169	0.273158
ENST00000587762	1.38127	3.46208	3.15983	0.00243506	0.273158
ENST00000471048	-1.51883	-0.365051	-3.15658	0.00244014	0.273158
ENST00000475870	-0.697337	4.0215	-3.156	0.00244433	0.273158
ENST00000409177	1.56612	-0.115599	3.15572	0.00244634	0.273158
ENST00000486501	-1.36734	-0.590008	-3.15543	0.0024526	0.273158
ENST00000605613	1.13689	1.65583	3.16941	0.00245499	0.273158
ENST00000524302	-0.907131	2.62748	-3.15452	0.00245582	0.273158
ENST00000282020	-0.977994	3.52295	-3.15526	0.00246095	0.273335
ENST00000384404	-0.67884	5.10376	-3.15314	0.00246794	0.273513
ENST00000493254	1.50528	-0.791682	3.15204	0.00247308	0.273513
ENST00000321348	1.48912	-0.640382	3.16568	0.00247632	0.273513
ENST00000526983	1.31679	-0.0340659	3.15155	0.0024767	0.273513
ENST00000534356	1.4141	-1.67412	3.15053	0.0024842	0.273724
ENST00000532902	-1.47004	-0.671132	-3.15032	0.0024857	0.273724
ENST00000498816	-1.37294	0.53258	-3.15148	0.00249007	0.273759
ENST00000564709	-0.924164	2.29272	-3.14954	0.0024931	0.273759
ENST00000371933	0.377276	6.84446	3.14842	0.00249968	0.273965
ENST00000309755	-1.36865	0.543884	-3.1481	0.00250206	0.273965
ENST00000400335	0.50245	4.48618	3.15033	0.00250761	0.274164
ENST00000576080	-1.51995	-0.347221	-3.1469	0.00251097	0.274164
ENST00000583321	1.40318	-1.70221	3.14604	0.0025193	0.274686
ENST00000524518	1.63025	-0.204133	3.14493	0.00252561	0.274732
ENST00000631594	-0.420965	7.43166	-3.14567	0.00252683	0.274732
ENST00000445210	-0.757589	4.05769	-3.14444	0.00253487	0.274876
ENST00000307602	0.354023	7.6595	3.14377	0.00253527	0.274876
ENST00000221930	1.11071	3.54303	3.14224	0.00254576	0.274947
ENST00000245912	1.4416	-1.13427	3.14195	0.0025479	0.274947
ENST00000512188	1.60454	-1.1138	3.1413	0.0025528	0.274947
ENST00000393164	-1.44697	-0.014328	-3.13947	0.00256664	0.274947
ENST00000603877	0.905745	2.73397	3.13872	0.00257233	0.274947
ENST00000433454	-1.40817	1.85418	-3.13813	0.00257686	0.274947
ENST00000519309	1.35588	-1.90817	3.13794	0.00257822	0.274947
ENST00000263640	0.976622	1.6707	3.13844	0.00257906	0.274947
ENST00000637658	1.48957	-1.06068	3.13774	0.00257977	0.274947
ENST00000607703	1.58766	0.595625	3.13758	0.00258101	0.274947
ENST00000411702	1.62551	0.830755	3.13709	0.00258468	0.274947
ENST00000368134	-1.39896	2.54519	-3.13684	0.00258662	0.274947
ENST00000443575	-1.53325	-0.807112	-3.13762	0.002587	0.274947
ENST00000414504	-1.64696	1.02432	-3.13804	0.00258974	0.274947
ENST00000399816	-0.554552	6.01084	-3.13791	0.00259225	0.274947
ENST00000636946	-1.36547	0.636551	-3.13639	0.0025961	0.274947
ENST00000448864	1.3876	0.220895	3.13556	0.00259639	0.274947
ENST00000564237	0.543116	4.9692	3.13404	0.00260802	0.275427
ENST00000216879	1.50243	-0.801051	3.13348	0.00261233	0.275427
ENST00000547311	-1.34296	-1.03357	-3.13322	0.0026144	0.275427
ENST00000359308	-0.824445	3.66875	-3.13276	0.00261802	0.275427
ENST00000460390	-0.858355	2.85322	-3.13231	0.00262141	0.275427
ENST00000467149	1.70827	0.104344	3.15699	0.0026223	0.275427
ENST00000636933	-0.876116	5.07952	-3.13325	0.00262715	0.275499
ENST00000260408	0.491113	5.92835	3.13118	0.00263011	0.275499
ENST00000580816	-1.74978	-0.235939	-3.13186	0.00264004	0.27604
ENST00000560486	1.57773	-0.782094	3.12881	0.00264854	0.27604
ENST00000491636	-0.91279	5.53309	-3.12904	0.0026493	0.27604
ENST00000460750	-1.39335	2.18259	-3.1281	0.00265409	0.27604
ENST00000361681	1.22778	5.74959	3.12754	0.00265843	0.27604
ENST00000297268	1.42475	-1.73137	3.12716	0.00266143	0.27604
ENST00000573866	-1.92428	0.895232	-3.12695	0.00266309	0.27604
ENST00000392690	-0.865152	5.45379	-3.1283	0.00266385	0.27604
ENST00000449152	1.58931	0.615805	3.12639	0.00266744	0.276043
ENST00000461673	1.31118	-0.310566	3.12591	0.00267126	0.276068
ENST00000477973	0.501282	6.23935	3.12493	0.00267893	0.276491
ENST00000369163	1.5452	-0.257956	3.1232	0.00269264	0.277536
ENST00000643968	1.3079	0.272084	3.12261	0.00269732	0.277648
ENST00000487875	-1.04377	2.3918	-3.12161	0.00270528	0.278063
ENST00000557410	-1.44741	0.431203	-3.12118	0.00270966	0.278063
ENST00000519517	1.27103	0.0624056	3.12006	0.00271762	0.278063
ENST00000416077	1.33909	-0.789556	3.11916	0.00272479	0.278063
ENST00000258439	0.500095	5.33844	3.11892	0.00272672	0.278063
ENST00000595243	1.3675	-2.0519	3.11886	0.00272728	0.278063
ENST00000484567	1.26933	1.40282	3.12124	0.00273432	0.278063
ENST00000265381	-0.512655	8.66834	-3.11936	0.00273604	0.278063
ENST00000373578	-1.21045	1.92365	-3.11761	0.0027372	0.278063
ENST00000433477	0.799037	3.63559	3.11707	0.00274159	0.278063
ENST00000487189	-1.33728	0.892216	-3.11658	0.00274703	0.278063
ENST00000497882	-0.615456	4.52307	-3.11571	0.00275254	0.278063
ENST00000375773	1.37581	-1.93759	3.11559	0.0027535	0.278063
ENST00000623674	1.14902	4.43683	3.1155	0.00275421	0.278063
ENST00000476944	-1.45296	-1.18294	-3.11537	0.00275531	0.278063
ENST00000260356	1.14889	5.16697	3.11445	0.00276272	0.278448
ENST00000642511	1.37868	-0.240199	3.11333	0.00277183	0.278713
ENST00000492706	-1.04399	3.41832	-3.11324	0.00277257	0.278713
ENST00000548505	1.61913	-1.24163	3.11191	0.00278344	0.279443
ENST00000333972	1.59646	-1.08312	3.11083	0.00279229	0.279883
ENST00000385258	-1.12095	2.0474	-3.11037	0.0027974	0.279883
ENST00000519485	-1.28389	-0.605355	-3.11005	0.00279869	0.279883
ENST00000489736	1.50922	-1.79391	3.10957	0.00280401	0.280053
ENST00000612339	1.03334	3.01657	3.10878	0.00280913	0.280202
ENST00000395799	-1.10316	1.51374	-3.10761	0.00281876	0.280315
ENST00000451355	1.43899	1.93935	3.10761	0.00282108	0.280315
ENST00000544759	-1.48722	-0.217794	-3.10732	0.00282113	0.280315
ENST00000358008	-1.9834	0.567615	-3.10766	0.00282828	0.280445
ENST00000459902	-1.32468	0.403721	-3.10662	0.00283291	0.280445
ENST00000431927	-1.33584	0.0322882	-3.10557	0.00283566	0.280445
ENST00000495184	1.78742	-0.462864	3.10504	0.00284005	0.280445
ENST00000468474	1.39576	-1.87134	3.1084	0.00284617	0.280445
ENST00000470752	1.44198	-1.08993	3.10396	0.00284905	0.280445
ENST00000557872	-1.50094	1.04963	-3.10382	0.00285027	0.280445
ENST00000260506	-0.721108	4.82684	-3.10291	0.00285785	0.280445
ENST00000556674	0.919469	2.43221	3.1089	0.00285808	0.280445
ENST00000582009	-1.21684	0.183512	-3.10261	0.00286039	0.280445
ENST00000429368	-0.772594	5.12592	-3.10195	0.00286588	0.280445
ENST00000466898	1.29451	0.101995	3.10062	0.00287706	0.280445
ENST00000505393	1.43447	-1.56568	3.09953	0.00288767	0.280445
ENST00000534966	0.86751	2.77317	3.10015	0.00289188	0.280445
ENST00000496026	1.362	0.331549	3.09837	0.00289612	0.280445
ENST00000298229	1.37555	-1.67462	3.09837	0.00289613	0.280445
ENST00000416847	-0.737266	3.04146	-3.09826	0.00289698	0.280445
ENST00000383703	1.25753	-0.832518	3.09814	0.00289805	0.280445
ENST00000361899	1.24741	8.72068	3.09805	0.00289878	0.280445
ENST00000470186	1.03259	2.51259	3.09752	0.00290327	0.280445
ENST00000526269	1.49879	-1.61699	3.09863	0.0029079	0.280445
ENST00000491611	-1.34833	-0.317813	-3.09663	0.00291086	0.280445
ENST00000521749	-1.0702	1.69161	-3.09904	0.00291174	0.280445
ENST00000589980	1.5514	-0.711101	3.09636	0.00291315	0.280445
ENST00000432045	-0.729994	8.06743	-3.09765	0.00291455	0.280445
ENST00000368223	1.20108	4.26393	3.09594	0.00291677	0.280445
ENST00000521757	-1.27635	-1.30281	-3.09484	0.00292616	0.280999
ENST00000307201	0.843889	2.21831	3.09411	0.00293238	0.281246
ENST00000075503	-1.4457	2.15585	-3.09478	0.00293769	0.281407
ENST00000515569	-1.50611	-0.114508	-3.09215	0.00294926	0.282165
ENST00000380482	1.48333	-0.631885	3.09129	0.00295667	0.282525
ENST00000493242	1.60341	-0.911657	3.08686	0.00299518	0.285233
ENST00000420213	1.39631	-1.29982	3.08677	0.00299601	0.285233
ENST00000432307	1.06955	0.997828	3.08676	0.00299608	0.285233
ENST00000342147	1.58659	-0.541818	3.08484	0.00301287	0.286473
ENST00000392547	1.49071	0.816783	3.0839	0.00302124	0.286473
ENST00000490685	1.4429	-1.65241	3.08344	0.00302522	0.286473
ENST00000572417	1.47936	-1.97592	3.08777	0.00302743	0.286473
ENST00000517913	-1.49686	2.75898	-3.08435	0.00302842	0.286473
ENST00000586142	1.43655	-1.14115	3.08268	0.00303195	0.286473
ENST00000478100	1.37848	0.883399	3.08233	0.00303505	0.286473
ENST00000361360	0.736835	6.4517	3.08094	0.00304865	0.287346
ENST00000335154	0.837026	4.9934	3.07999	0.00305587	0.287346
ENST00000473562	1.72333	0.309903	3.07994	0.0030563	0.287346
ENST00000452181	-1.03998	2.92425	-3.08076	0.00305937	0.287346
ENST00000488090	-0.820545	3.39484	-3.07925	0.00306288	0.287346
ENST00000340058	-1.317	3.34458	-3.0796	0.00307326	0.28784
ENST00000382751	-0.387428	8.51675	-3.07921	0.0030756	0.28784
ENST00000606738	1.61617	0.487494	3.07543	0.00309677	0.289323
ENST00000515546	1.12091	0.242751	3.07481	0.00310232	0.289323
ENST00000375023	2.12663	-0.155826	3.07477	0.00310267	0.289323
ENST00000649129	1.47727	-0.218512	3.08304	0.00310943	0.289604
ENST00000226279	1.36629	-0.645411	3.07322	0.00312414	0.290304
ENST00000328850	1.35796	-1.90032	3.07301	0.00312446	0.290304
ENST00000403084	1.70387	-0.910332	3.07071	0.00313958	0.290964
ENST00000506997	1.01929	2.63406	3.07046	0.00314189	0.290964
ENST00000364377	-1.07754	5.20058	-3.06921	0.00315741	0.290964
ENST00000460833	1.23195	1.64384	3.06859	0.00316143	0.290964
ENST00000441617	-1.384	2.02396	-3.06783	0.003166	0.290964
ENST00000389286	0.854876	4.04428	3.06754	0.00316867	0.290964
ENST00000558681	1.07168	1.14292	3.06752	0.00316885	0.290964
ENST00000472225	1.26551	0.174193	3.08876	0.00316887	0.290964
ENST00000541339	-1.08979	1.48536	-3.06738	0.00317021	0.290964
ENST00000369802	1.38473	0.145876	3.0677	0.00317265	0.290964
ENST00000356628	1.26353	2.148	3.07178	0.00317297	0.290964
ENST00000405854	1.67123	-0.252857	3.06647	0.00317859	0.291135
ENST00000476089	1.64258	-1.36444	3.06569	0.00318578	0.291306
ENST00000552099	-1.0112	2.13354	-3.06545	0.00318799	0.291306
ENST00000638821	-1.14269	3.54869	-3.06627	0.00319471	0.291575
ENST00000296140	1.95055	-0.121034	3.06315	0.00320946	0.291994
ENST00000648200	-0.488465	9.77537	-3.06411	0.00321023	0.291994
ENST00000641216	1.13353	1.28258	3.06302	0.00321064	0.291994
ENST00000440102	-1.30137	2.31002	-3.06135	0.00323944	0.294034
ENST00000474481	-0.608717	3.86678	-3.05981	0.00324068	0.294034
ENST00000278742	1.51686	0.640539	3.05858	0.00325228	0.294439
ENST00000498027	0.886727	2.12444	3.0589	0.00325337	0.294439
ENST00000569467	1.36103	-0.959128	3.0574	0.00326345	0.294439
ENST00000552054	1.26876	-1.99143	3.05736	0.00326389	0.294439
ENST00000381410	0.643941	4.16314	3.05654	0.00327166	0.294439
ENST00000551314	-1.3116	-0.243108	-3.05613	0.00327552	0.294439
ENST00000648928	-0.973768	1.78735	-3.05726	0.00327646	0.294439
ENST00000412108	-1.12459	3.02183	-3.0559	0.00327771	0.294439
ENST00000523780	-1.28876	0.314419	-3.05645	0.00327941	0.294439
ENST00000564160	-0.754698	4.42658	-3.05378	0.00330989	0.295504
ENST00000541864	1.4107	-1.58722	3.05175	0.00331741	0.295504
ENST00000483930	1.25531	-1.78311	3.05154	0.00331949	0.295504
ENST00000616682	1.26882	1.00436	3.05163	0.0033266	0.295504
ENST00000506621	1.3287	-0.451364	3.05062	0.00332835	0.295504
ENST00000393480	1.40874	-0.185906	3.05553	0.00332846	0.295504
ENST00000434974	-0.898379	4.57177	-3.05069	0.00332879	0.295504
ENST00000455482	1.30299	1.78773	3.05609	0.00333119	0.295504
ENST00000565684	1.47551	-0.277439	3.05125	0.0033317	0.295504
ENST00000309955	0.513386	7.44269	3.04986	0.00333566	0.295504
ENST00000531546	1.50226	-1.62832	3.04958	0.00333838	0.295504
ENST00000637885	-1.47317	1.21633	-3.05086	0.00334127	0.295504
ENST00000519589	-1.00129	2.40031	-3.04932	0.00334339	0.295504
ENST00000334077	-1.38533	0.146849	-3.04892	0.00334479	0.295504
ENST00000535385	-0.894133	3.86816	-3.04776	0.00335601	0.296157
ENST00000509473	-1.05612	4.43023	-3.0483	0.00336218	0.296362
ENST00000396724	-1.36251	-0.922511	-3.04518	0.00338125	0.297704
ENST00000422149	1.32688	0.0223335	3.04409	0.00339911	0.297927
ENST00000378551	0.604783	4.09517	3.04315	0.00340118	0.297927
ENST00000623089	1.43593	-1.61419	3.04301	0.00340255	0.297927
ENST00000415146	1.35576	-0.844607	3.04281	0.00340449	0.297927
ENST00000337432	1.0263	1.70321	3.04258	0.00340678	0.297927
ENST00000395260	1.37277	-0.504515	3.04257	0.00340691	0.297927
ENST00000243346	1.53668	-0.616823	3.04192	0.00341325	0.298063
ENST00000484857	-1.21456	1.52655	-3.04163	0.00341617	0.298063
ENST00000535322	-1.33472	-1.07692	-3.04121	0.00342591	0.298487
ENST00000299665	1.63315	-1.54979	3.04036	0.00342875	0.298487
ENST00000502694	-1.47396	-0.594782	-3.03818	0.00345124	0.300068
ENST00000468573	-0.824083	5.44721	-3.03681	0.00346409	0.300068
ENST00000384000	-0.846573	4.81837	-3.03639	0.00347352	0.300068
ENST00000261623	1.67619	-0.63635	3.05134	0.0034748	0.300068
ENST00000600590	-1.1198	-1.72781	-3.03521	0.00348015	0.300068
ENST00000635752	1.26003	-0.766606	3.03521	0.0034802	0.300068
ENST00000592251	-1.01501	1.5813	-3.03507	0.00348162	0.300068
ENST00000551391	1.11374	0.680965	3.03487	0.00348363	0.300068
ENST00000472754	1.46258	-1.63856	3.0347	0.0034853	0.300068
ENST00000620260	-0.600087	5.29974	-3.03462	0.00349174	0.300068
ENST00000522771	-0.6369	14.0887	-3.03341	0.00349831	0.300068
ENST00000598319	1.80789	0.0505535	3.0325	0.00350758	0.300068
ENST00000485849	-1.34929	-0.379026	-3.03229	0.00350971	0.300068
ENST00000510546	1.28417	0.22493	3.03205	0.00351211	0.300068
ENST00000586198	-1.20787	-1.31219	-3.03201	0.00351321	0.300068
ENST00000262031	0.66279	5.00216	3.03097	0.0035231	0.300068
ENST00000322220	-0.915382	5.54481	-3.0317	0.00352589	0.300068
ENST00000494676	-0.826389	2.68233	-3.03038	0.00352907	0.300068
ENST00000530911	1.11711	1.48291	3.03028	0.00353015	0.300068
ENST00000216044	0.606529	3.8601	3.03003	0.00353442	0.300068
ENST00000372726	1.47532	-0.254242	3.02982	0.00353483	0.300068
ENST00000589740	-1.2829	1.04855	-3.03041	0.00354132	0.300068
ENST00000366784	1.76066	-0.109271	3.02906	0.0035426	0.300068
ENST00000307145	0.480574	5.9468	3.03243	0.00354909	0.300068
ENST00000532809	-1.45982	-0.113413	-3.02777	0.00355574	0.300068
ENST00000497497	-2.05065	0.647541	-3.02713	0.00356681	0.300068
ENST00000649183	-1.32031	-1.48723	-3.0269	0.00357032	0.300068
ENST00000558575	-1.36185	0.0716556	-3.02664	0.0035706	0.300068
ENST00000421685	0.646967	2.69876	3.02613	0.0035727	0.300068
ENST00000595146	0.56021	4.34824	3.02595	0.00357629	0.300068
ENST00000642044	-1.17832	1.54471	-3.02554	0.00357875	0.300068
ENST00000459368	-1.22213	-0.755148	-3.02544	0.0035798	0.300068
ENST00000379375	0.905246	3.64667	3.02521	0.00358219	0.300068
ENST00000363293	-0.933564	3.17091	-3.02625	0.00358478	0.300068
ENST00000536684	1.45431	1.58272	3.02492	0.0035852	0.300068
ENST00000477278	1.46031	-1.44666	3.0246	0.00358847	0.300068
ENST00000424524	-1.39703	1.9253	-3.02442	0.00359054	0.300068
ENST00000583651	-1.91116	0.338198	-3.02348	0.00360008	0.300472
ENST00000328823	1.07849	1.64883	3.02318	0.00360315	0.300472
ENST00000624883	-1.64369	0.539993	-3.02189	0.00361751	0.300995
ENST00000467116	1.22941	-1.26463	3.0213	0.00362278	0.300995
ENST00000533444	-1.02073	2.04494	-3.02121	0.00362435	0.300995
ENST00000383929	-0.733557	4.6634	-3.0212	0.00362499	0.300995
ENST00000414906	-1.46557	-0.659226	-3.0205	0.00363118	0.301186
ENST00000422466	-1.03179	1.37597	-3.01975	0.00363901	0.301358
ENST00000363762	-1.05552	3.90856	-3.01971	0.00364388	0.301358
ENST00000540578	0.97563	2.02089	3.01918	0.00364495	0.301358
ENST00000509420	-1.15353	2.49268	-3.01802	0.00365951	0.301905
ENST00000543397	-1.2159	1.1563	-3.0185	0.00366283	0.301905
ENST00000476454	-0.62767	4.07414	-3.01739	0.0036654	0.301905
ENST00000268459	0.780284	7.07358	3.01723	0.0036672	0.301905
ENST00000463604	1.06605	2.36877	3.01689	0.00367323	0.301979
ENST00000481568	1.62408	-0.483255	3.01576	0.00368113	0.301979
ENST00000447706	1.29919	-1.41727	3.01546	0.00368428	0.301979
ENST00000609151	0.918586	2.50091	3.01519	0.00369206	0.301979
ENST00000558837	-1.23053	1.68408	-3.01445	0.00370183	0.301979
ENST00000528686	-1.15945	-1.12107	-3.01375	0.0037024	0.301979
ENST00000376462	-0.980803	2.97867	-3.01356	0.00370676	0.301979
ENST00000591337	-1.16632	1.14755	-3.01283	0.00371221	0.301979
ENST00000489591	1.35483	-1.09797	3.01318	0.00371356	0.301979
ENST00000363151	-1.21989	-1.72246	-3.01343	0.00371546	0.301979
ENST00000459750	-0.509006	5.32499	-3.01272	0.00371584	0.301979
ENST00000606521	1.45182	-1.20114	3.01231	0.00371778	0.301979
ENST00000377269	-0.613578	4.90524	-3.01312	0.00371888	0.301979
ENST00000529565	1.88195	0.392389	3.01181	0.00372318	0.302011
ENST00000384970	-1.37061	0.696134	-3.01089	0.00373338	0.302469
ENST00000543292	-1.65396	0.639214	-3.01146	0.00373665	0.302469
ENST00000389680	0.931434	9.13772	3.00994	0.00374329	0.30269
ENST00000356384	1.24118	0.736822	3.01478	0.00375348	0.303196
ENST00000520413	-1.0073	5.5429	-3.00789	0.00376544	0.303845
ENST00000493635	1.69059	0.702628	3.01326	0.00377222	0.304045
ENST00000480784	-1.63393	-0.311991	-3.00693	0.00377579	0.304045
ENST00000467148	1.44912	0.203253	3.00642	0.00378134	0.304175
ENST00000564563	-1.3472	0.574469	-3.00544	0.00380075	0.304937
ENST00000325875	0.605699	3.00713	3.00465	0.00380092	0.304937
ENST00000385228	-1.09161	1.47182	-3.00564	0.00380265	0.304937
ENST00000220325	0.963111	3.58569	3.00241	0.00382517	0.306237
ENST00000636179	1.33362	0.198438	3.00226	0.00382677	0.306237
ENST00000616292	-0.839254	7.38113	-3.00206	0.0038395	0.306864
ENST00000608228	1.4358	-0.447607	3.00191	0.00384466	0.306864
ENST00000526897	1.3435	0.0474974	3.00015	0.00385002	0.306864
ENST00000593888	1.40888	-0.976765	2.99983	0.00385357	0.306864
ENST00000561054	1.60181	-0.825413	2.99944	0.00385795	0.306864
ENST00000519940	1.66748	0.0265147	2.99913	0.00386131	0.306864
ENST00000503814	0.382698	7.46551	2.99872	0.00386584	0.306864
ENST00000651671	1.26408	-0.311052	2.99868	0.00386636	0.306864
ENST00000518739	-0.9628	2.06872	-2.99791	0.0038755	0.306984
ENST00000437534	-1.04166	6.46077	-2.99783	0.00387582	0.306984
ENST00000629291	-1.39533	1.15704	-2.99798	0.00388211	0.307156
ENST00000463455	-1.26267	0.890685	-2.99794	0.00388594	0.307156
ENST00000635545	-1.29907	2.2609	-2.9971	0.00389322	0.307405
ENST00000514281	1.47019	-1.67611	2.99592	0.00389704	0.307405
ENST00000616590	-1.21793	0.283959	-2.99538	0.00390311	0.307506
ENST00000617191	1.47205	-0.201195	2.99495	0.00390789	0.307506
ENST00000549063	-0.87941	2.95312	-2.99396	0.00391902	0.307506
ENST00000445283	-1.42204	-0.380555	-2.99395	0.00391912	0.307506
ENST00000476730	-0.634298	5.77099	-2.9936	0.00392306	0.307506
ENST00000472488	1.55076	-0.506692	2.99341	0.00392534	0.307506
ENST00000537930	-1.34848	-1.08415	-2.99314	0.00392823	0.307506
ENST00000524877	1.13425	2.45885	2.99297	0.00393014	0.307506
ENST00000453229	-0.69611	3.63494	-2.99217	0.00393923	0.307905
ENST00000325885	-2.30962	1.08813	-2.99235	0.00395047	0.30825
ENST00000520981	-1.13279	1.37021	-2.99107	0.00395161	0.30825
ENST00000523191	1.31381	-0.551737	2.98979	0.00396616	0.309073
ENST00000502027	0.838348	2.38822	2.99069	0.00397968	0.309374
ENST00000540394	1.51214	-0.680222	2.9881	0.00398535	0.309374
ENST00000452382	-1.47679	-0.537771	-2.98808	0.00398565	0.309374
ENST00000373218	0.293644	7.75574	2.98804	0.00398603	0.309374
ENST00000533061	1.55823	-0.452186	2.98742	0.00399318	0.309618
ENST00000556285	1.35655	-0.326524	2.98649	0.00400382	0.30987
ENST00000625980	-0.590327	6.07761	-2.98638	0.00400715	0.30987
ENST00000408926	-1.27302	1.25848	-2.98693	0.0040114	0.30987
ENST00000453082	-0.482745	9.93472	-2.98574	0.00401246	0.30987
ENST00000325980	1.58302	-0.0278073	2.98454	0.00402625	0.310176
ENST00000492085	-0.449229	8.43011	-2.98543	0.00403035	0.310176
ENST00000345097	0.427901	5.73568	2.98394	0.00403314	0.310176
ENST00000469416	-1.36749	0.164275	-2.98368	0.00403616	0.310176
ENST00000417799	1.51595	-1.37682	2.98345	0.00403902	0.310176
ENST00000380872	0.694165	3.23825	2.98333	0.00404051	0.310176
ENST00000618844	1.08052	1.30795	2.98267	0.00404783	0.310266
ENST00000470802	-0.5538	4.92906	-2.98225	0.0040527	0.310266
ENST00000421812	-0.644494	7.17082	-2.98261	0.00405372	0.310266
ENST00000373381	-1.09338	3.66709	-2.9818	0.00406483	0.310809
ENST00000481880	-0.78044	2.39987	-2.98218	0.00407656	0.311398
ENST00000620472	1.17602	0.576344	2.97875	0.00409345	0.312267
ENST00000639578	1.18137	-2.22648	2.97805	0.00410163	0.312267
ENST00000531548	1.30441	0.365636	2.97774	0.00410531	0.312267
ENST00000539311	1.1849	-1.61619	2.97749	0.00410817	0.312267
ENST00000523711	0.785684	3.58113	2.97747	0.0041085	0.312267
ENST00000368489	-0.563222	7.49903	-2.97667	0.00411807	0.312267
ENST00000647335	1.18176	-0.626079	2.97845	0.00411938	0.312267
ENST00000451988	-1.33396	-0.362739	-2.97644	0.00412052	0.312267
ENST00000338882	-0.88308	3.87256	-2.97607	0.00412492	0.312267
ENST00000468190	1.12631	-1.41433	2.97593	0.00413426	0.312267
ENST00000434440	-0.98996	3.22028	-2.97524	0.00414437	0.312267
ENST00000339007	1.4301	-1.85429	2.97421	0.00414694	0.312267
ENST00000373910	-1.17135	-1.28233	-2.97391	0.00415222	0.312267
ENST00000492061	-1.21878	-1.12016	-2.97492	0.00415431	0.312267
ENST00000360578	-0.465703	9.41766	-2.9743	0.00415515	0.312267
ENST00000465306	1.42745	-1.82563	2.97334	0.00415723	0.312267
ENST00000381318	-0.368069	7.86323	-2.97404	0.00415838	0.312267
ENST00000464493	1.33453	-1.35982	2.97342	0.00416506	0.312267
ENST00000564158	0.629553	4.75522	2.97257	0.00416632	0.312267
ENST00000369063	-0.602946	5.22114	-2.97249	0.00416873	0.312267
ENST00000537592	1.57309	0.45611	2.97088	0.00418652	0.312888
ENST00000651315	-1.27102	0.649559	-2.97083	0.00418709	0.312888
ENST00000571564	-1.3649	-0.373584	-2.97066	0.00418916	0.312888
ENST00000306085	1.1781	3.75185	2.97637	0.00420078	0.312892
ENST00000481779	-1.2396	1.3964	-2.97013	0.0042022	0.312892
ENST00000479231	-1.37069	-0.23733	-2.96939	0.00420435	0.312892
ENST00000433211	1.38602	1.79814	2.9693	0.0042054	0.312892
ENST00000267068	0.343815	7.36039	2.96839	0.00421632	0.313006
ENST00000558671	-0.767647	4.24683	-2.96783	0.00422308	0.313006
ENST00000522190	0.643985	3.45039	2.97352	0.00422674	0.313006
ENST00000580203	0.45212	3.86372	2.96744	0.00422782	0.313006
ENST00000464461	1.31731	-1.75573	2.96712	0.00423167	0.313006
ENST00000609356	1.09115	0.703748	2.97604	0.00423868	0.313006
ENST00000366159	1.35789	-1.53908	2.97214	0.00424427	0.313006
ENST00000377113	-0.709463	4.07866	-2.96539	0.00425415	0.313006
ENST00000392357	-0.833335	2.60234	-2.9651	0.00425604	0.313006
ENST00000286298	0.577056	4.81326	2.96765	0.00425876	0.313006
ENST00000319172	1.21096	-0.206674	2.96868	0.00425959	0.313006
ENST00000361729	1.75052	-1.26141	2.96478	0.00425999	0.313006
ENST00000434618	0.488793	5.99504	2.96455	0.00426272	0.313006
ENST00000340635	-1.02879	4.08258	-2.96464	0.00426556	0.313006
ENST00000368358	-0.859091	4.20399	-2.96415	0.00426768	0.313006
ENST00000530343	1.36316	-0.36148	2.96254	0.00428722	0.313542
ENST00000389617	0.78363	2.68253	2.98642	0.00428774	0.313542
ENST00000417368	0.848353	5.07844	2.97297	0.00429406	0.313542
ENST00000582147	1.51217	-0.363228	2.96196	0.00429437	0.313542
ENST00000471704	1.3041	-0.520789	2.96117	0.00430397	0.313542
ENST00000609511	1.40315	-0.120269	2.96114	0.00430631	0.313542
ENST00000331351	-1.06622	4.38213	-2.96072	0.00431456	0.313542
ENST00000330943	1.48622	-1.26524	2.95904	0.00433026	0.313542
ENST00000431679	1.3203	-0.45729	2.96298	0.00433117	0.313542
ENST00000482490	1.53114	-1.32854	2.95885	0.00433259	0.313542
ENST00000453798	1.57802	0.739155	2.9584	0.0043456	0.313542
ENST00000481731	1.67808	-1.52365	2.95753	0.00434889	0.313542
ENST00000492535	0.496038	6.41178	2.95738	0.00435067	0.313542
ENST00000480902	-1.25235	0.379927	-2.95721	0.00435369	0.313542
ENST00000288235	1.30105	2.52509	2.95659	0.00436051	0.313542
ENST00000587905	-1.31861	1.09701	-2.95492	0.00438126	0.313542
ENST00000377474	0.749069	5.93838	2.95492	0.00438129	0.313542
ENST00000405331	0.859261	1.74943	2.95414	0.00439103	0.313542
ENST00000480030	-0.760841	3.4774	-2.95466	0.00439146	0.313542
ENST00000495017	-0.964687	2.50382	-2.95422	0.00439313	0.313542
ENST00000369301	0.349902	7.17504	2.95396	0.0043933	0.313542
ENST00000462222	-1.2834	0.441154	-2.95394	0.00439355	0.313542
ENST00000568408	-1.20005	-1.1083	-2.95402	0.00439551	0.313542
ENST00000600800	1.27889	0.619142	2.95317	0.00440308	0.313542
ENST00000411143	1.52348	-0.864438	2.95802	0.00440498	0.313542
ENST00000425402	1.50501	0.695567	2.95259	0.00441046	0.313542
ENST00000491192	1.51199	0.867723	2.95244	0.00441233	0.313542
ENST00000472046	0.601795	5.34758	2.95289	0.00441334	0.313542
ENST00000474221	1.44847	-0.548291	2.95891	0.00441549	0.313542
ENST00000488894	0.586653	3.04022	2.953	0.00441561	0.313542
ENST00000635124	-0.703167	3.06225	-2.95197	0.00441823	0.313542
ENST00000385207	-1.26805	2.84999	-2.95187	0.00441944	0.313542
ENST00000505623	1.51599	-1.27997	2.95177	0.00442069	0.313542
ENST00000504335	1.49102	0.497549	2.95447	0.00442464	0.313542
ENST00000608925	0.79478	2.41142	2.95143	0.00442498	0.313542
ENST00000459729	1.33012	0.122906	2.95391	0.00442529	0.313542
ENST00000524245	-0.931642	1.78056	-2.95134	0.00442614	0.313542
ENST00000640307	-0.949617	5.74412	-2.95238	0.00443061	0.313542
ENST00000597088	1.16724	-1.00773	2.95182	0.00443317	0.313542
ENST00000497965	-1.47121	0.728579	-2.95036	0.00443842	0.313627
ENST00000466229	2.14224	0.463443	2.95218	0.00445789	0.314441
ENST00000594312	1.29615	-0.0688879	2.94856	0.00446119	0.314441
ENST00000566085	-1.29769	0.605178	-2.94849	0.00446214	0.314441
ENST00000287814	1.26067	0.504606	2.94812	0.00446682	0.314484
ENST00000585594	-1.19278	2.36148	-2.94766	0.00448518	0.315386
ENST00000651189	-1.39873	-1.01224	-2.94629	0.00449005	0.315386
ENST00000336032	0.548158	5.86091	2.94612	0.00449219	0.315386
ENST00000559056	-1.31893	-0.409071	-2.94583	0.00449595	0.315386
ENST00000409652	1.15014	4.47373	2.94541	0.00450125	0.315471
ENST00000427716	0.54117	5.19434	2.94679	0.00450593	0.315513
ENST00000443878	0.998461	1.14899	2.9439	0.0045206	0.316059
ENST00000376705	-0.595827	5.99872	-2.9438	0.00452191	0.316059
ENST00000439415	1.09628	0.881311	2.94338	0.00454095	0.316482
ENST00000531583	-0.781552	3.90225	-2.94232	0.00454096	0.316482
ENST00000371523	-1.42729	0.322978	-2.94231	0.00454106	0.316482
ENST00000470126	1.04762	1.05599	2.94206	0.00454433	0.316482
ENST00000644817	1.67769	-0.116665	2.94135	0.00455341	0.316829
ENST00000603334	-0.723683	5.03357	-2.93823	0.0045939	0.319359
ENST00000488905	-1.14543	0.29568	-2.93552	0.00462938	0.320994
ENST00000460993	1.55669	-1.45544	2.93551	0.00462942	0.320994
ENST00000606169	-1.24309	2.37794	-2.93529	0.00463232	0.320994
ENST00000477632	0.975424	1.66818	2.93477	0.00463918	0.320994
ENST00000620307	1.32524	-0.524843	2.93464	0.00464089	0.320994
ENST00000560924	1.64455	-0.222937	2.93453	0.00464234	0.320994
ENST00000466846	0.429879	4.97763	2.93289	0.00466389	0.321262
ENST00000617031	-0.76848	2.74096	-2.93415	0.00466401	0.321262
ENST00000482693	0.490148	4.24269	2.93286	0.00466435	0.321262
ENST00000619805	1.28092	-0.28309	2.93262	0.00466757	0.321262
ENST00000463989	1.56675	-0.926609	2.93255	0.00466841	0.321262
ENST00000604036	-0.873135	3.57497	-2.9322	0.00467424	0.321262
ENST00000466761	-1.35978	-0.573217	-2.9319	0.00467725	0.321262
ENST00000542509	-1.0569	3.18882	-2.93096	0.00469128	0.321262
ENST00000634903	0.598249	3.21821	2.94399	0.00469169	0.321262
ENST00000591612	-0.513811	4.8447	-2.93101	0.00469359	0.321262
ENST00000344604	1.50774	-1.12222	2.93763	0.00469776	0.321262
ENST00000537830	1.11331	-1.99437	2.92996	0.00470283	0.321262
ENST00000375540	1.5279	-0.318725	2.92993	0.00470319	0.321262
ENST00000621707	1.55418	-1.04839	2.92981	0.00470476	0.321262
ENST00000592790	1.06551	3.34458	2.92976	0.00471036	0.321262
ENST00000525725	1.39519	-1.30217	2.93085	0.00471586	0.321262
ENST00000377934	1.68399	0.13916	2.92876	0.0047188	0.321262
ENST00000288383	-1.20563	1.04448	-2.92991	0.00472102	0.321262
ENST00000486329	1.40464	-1.66237	2.92776	0.00473217	0.32163
ENST00000535058	-0.610331	5.9063	-2.92836	0.00473475	0.32163
ENST00000541544	1.24242	-1.57473	2.9272	0.0047397	0.321683
ENST00000441879	-1.25936	0.431381	-2.92687	0.00474401	0.321694
ENST00000402984	1.44084	-1.66407	2.92653	0.00474868	0.321728
ENST00000489905	-1.48751	-0.626594	-2.92602	0.00475554	0.321911
ENST00000320241	1.79415	-0.24117	2.92826	0.00476799	0.322471
ENST00000480395	1.65758	0.54292	2.92427	0.00477905	0.322616
ENST00000529308	-0.693322	4.38007	-2.92409	0.00478152	0.322616
ENST00000648582	0.967956	1.72378	2.9269	0.00478265	0.322616
ENST00000593088	-1.06498	1.64993	-2.92357	0.00478855	0.322732
ENST00000547317	-1.30848	0.196697	-2.92312	0.00479456	0.322856
ENST00000639401	1.37938	-1.1969	2.9222	0.00480712	0.323215
ENST00000578653	1.27286	-0.111664	2.9222	0.00480934	0.323215
ENST00000466882	-1.17125	0.478231	-2.92182	0.00481244	0.323215
ENST00000301015	1.1273	3.75129	2.92118	0.00482641	0.323872
ENST00000423838	-1.32975	-1.12487	-2.91924	0.00484741	0.324999
ENST00000470420	-1.13208	-1.74758	-2.91867	0.0048553	0.325208
ENST00000410163	-0.830275	3.23969	-2.91908	0.00486133	0.325208
ENST00000399868	0.934388	2.27388	2.91811	0.00486315	0.325208
ENST00000370103	-0.894944	4.22764	-2.91771	0.00487568	0.325459
ENST00000452576	-1.51318	2.51466	-2.91676	0.00488148	0.325459
ENST00000374597	1.40548	-0.293084	2.91619	0.00488938	0.325459
ENST00000649441	-0.981908	1.70738	-2.91565	0.00489689	0.325459
ENST00000559299	1.2841	-1.44159	2.91538	0.00490058	0.325459
ENST00000621282	1.2194	1.53034	2.91533	0.00490121	0.325459
ENST00000264828	1.08864	4.14432	2.91493	0.00490688	0.325459
ENST00000363098	-1.08865	2.42401	-2.91547	0.00491293	0.325459
ENST00000478868	-0.960471	2.80457	-2.91444	0.00491365	0.325459
ENST00000636582	-0.86191	2.26282	-2.91443	0.00491369	0.325459
ENST00000433855	-0.898119	3.63916	-2.91569	0.00491422	0.325459
ENST00000560470	1.35766	0.051923	2.92079	0.00491742	0.325459
ENST00000475983	-0.788118	6.10627	-2.91376	0.00492303	0.325552
ENST00000598744	-1.0554	3.37921	-2.91336	0.00492853	0.325637
ENST00000293805	1.65386	-0.198947	2.91292	0.0049347	0.325766
ENST00000645467	-1.04546	2.25556	-2.91149	0.00495464	0.326803
ENST00000472146	1.15939	3.49936	2.93165	0.00496042	0.326827
ENST00000469216	1.66273	0.33846	2.91157	0.00496345	0.326827
ENST00000316368	1.36721	-0.749496	2.91214	0.00497458	0.326906
ENST00000456283	0.532477	5.0078	2.90966	0.00498021	0.326906
ENST00000528389	0.722946	3.14058	2.91499	0.00498087	0.326906
ENST00000425104	-0.790909	4.88986	-2.91018	0.00498156	0.326906
ENST00000521913	-0.749597	5.28399	-2.91008	0.00498882	0.327104
ENST00000553692	-0.934098	4.56538	-2.90852	0.00499628	0.32717
ENST00000564138	1.51408	0.676719	2.90838	0.0049983	0.32717
ENST00000462315	1.48426	0.856329	2.90805	0.00500283	0.32719
ENST00000465256	-0.738972	3.54281	-2.90778	0.00500745	0.327216
ENST00000317543	-1.4542	-0.289891	-2.90714	0.00502518	0.328097
ENST00000568936	-1.17285	-1.45737	-2.90606	0.00503099	0.328199
ENST00000506912	0.933474	1.93782	2.9051	0.00504469	0.328661
ENST00000624545	1.30766	-1.72563	2.90496	0.00504657	0.328661
ENST00000369500	-0.96038	3.96844	-2.90462	0.0050529	0.328718
ENST00000602298	1.43373	-1.42632	2.90429	0.00505814	0.328718
ENST00000479337	-1.3108	-1.50503	-2.904	0.0050602	0.328718
ENST00000488380	-0.606567	4.37696	-2.90353	0.00506698	0.328791
ENST00000423318	-1.50594	-0.0999052	-2.90411	0.00507106	0.328791
ENST00000375759	0.275823	9.70631	2.90303	0.00507409	0.328791
ENST00000387342	1.28521	3.80049	2.90266	0.00507943	0.328861
ENST00000652688	1.2941	0.28615	2.9078	0.00509972	0.329899
ENST00000296978	-1.31958	0.881126	-2.90134	0.00510866	0.329991
ENST00000648323	1.53148	-1.07614	2.90054	0.00510974	0.329991
ENST00000581612	1.30993	-0.366548	2.90014	0.0051155	0.329991
ENST00000493542	1.3782	-0.166506	2.89995	0.00511822	0.329991
ENST00000612320	-0.59028	5.79679	-2.89939	0.00512633	0.330238
ENST00000589161	-0.913834	3.28661	-2.89818	0.00514376	0.330874
ENST00000482459	-0.780078	3.51232	-2.89811	0.00514476	0.330874
ENST00000337929	1.61005	-0.420804	2.89737	0.00515544	0.331285
ENST00000397572	1.12442	0.229693	2.89687	0.00516277	0.331415
ENST00000580724	1.19351	0.704921	2.89664	0.00516604	0.331415
ENST00000531936	-1.25926	1.11173	-2.89612	0.00517364	0.331529
ENST00000598544	1.25308	-0.964654	2.89593	0.00517638	0.331529
ENST00000624667	-0.429943	8.20686	-2.89503	0.00518966	0.331716
ENST00000449202	0.78389	1.9594	2.89501	0.00518976	0.331716
ENST00000491997	1.1175	0.334253	2.89485	0.00519219	0.331716
ENST00000475358	1.46313	-1.30299	2.89604	0.0051996	0.331762
ENST00000300456	-0.423922	6.78854	-2.89421	0.00520148	0.331762
ENST00000601609	-0.638323	4.9061	-2.89325	0.00521559	0.331976
ENST00000565700	-0.671067	5.66261	-2.89307	0.00521814	0.331976
ENST00000472038	1.53359	-0.536557	2.89877	0.00522086	0.331976
ENST00000515080	-1.34006	-1.29885	-2.89281	0.00522202	0.331976
ENST00000467370	1.40293	-0.391284	2.89442	0.00522664	0.331997
ENST00000361069	1.22604	2.53252	2.89216	0.00523694	0.332315
ENST00000493493	-1.21495	4.49129	-2.89112	0.00524688	0.332315
ENST00000443658	1.46945	-0.93868	2.89104	0.00524797	0.332315
ENST00000531482	0.80158	1.89555	2.89098	0.00524884	0.332315
ENST00000309720	-1.39621	-0.0253049	-2.89111	0.00525891	0.33268
ENST00000418736	1.02829	0.646675	2.88934	0.00527309	0.333304
ENST00000449877	-1.40822	-0.231314	-2.8881	0.00529139	0.333684
ENST00000222573	0.952012	4.24813	2.89508	0.00529313	0.333684
ENST00000612113	-1.05045	1.8416	-2.88824	0.00529437	0.333684
ENST00000602059	0.933901	1.84426	2.88777	0.00529636	0.333684
ENST00000535194	1.33108	-0.252514	2.89284	0.00530627	0.334036
ENST00000527897	-1.15866	2.58116	-2.88597	0.00532319	0.334828
ENST00000371205	1.12094	2.92675	2.89306	0.00533551	0.335331
ENST00000536769	1.12279	1.55527	2.88777	0.00534884	0.335895
ENST00000459709	-1.30026	-1.06045	-2.8836	0.00535872	0.336242
ENST00000310613	1.37765	-0.224376	2.8812	0.00539473	0.336908
ENST00000256689	0.962785	1.81357	2.88115	0.00539555	0.336908
ENST00000506052	1.36362	-1.85741	2.88032	0.0054081	0.336908
ENST00000531674	1.3214	-0.878876	2.87969	0.00541759	0.336908
ENST00000256646	0.846153	5.27107	2.87886	0.00543029	0.336908
ENST00000500179	-0.817289	3.71508	-2.8787	0.00543265	0.336908
ENST00000258042	-1.56923	1.37003	-2.87856	0.00543489	0.336908
ENST00000444663	-1.20359	0.758773	-2.87851	0.0054356	0.336908
ENST00000506178	1.26616	-1.86619	2.8785	0.00543582	0.336908
ENST00000463753	1.37156	-0.212631	2.87812	0.0054418	0.336908
ENST00000484989	1.50587	-0.208548	2.87805	0.00544253	0.336908
ENST00000310085	-0.671215	4.50619	-2.87779	0.0054466	0.336908
ENST00000607145	1.37357	-0.748828	2.87756	0.00545038	0.336908
ENST00000581559	-1.35048	-0.362334	-2.877	0.00545869	0.336908
ENST00000531944	0.840204	1.30125	2.87886	0.0054604	0.336908
ENST00000411529	0.342625	7.72665	2.87666	0.00546382	0.336908
ENST00000334194	-1.07655	3.91721	-2.87664	0.00546419	0.336908
ENST00000496845	-1.03522	1.78405	-2.8779	0.00546498	0.336908
ENST00000607359	-1.01628	2.68242	-2.87624	0.00547083	0.336908
ENST00000347613	-1.06592	1.45047	-2.87618	0.00547114	0.336908
ENST00000376630	1.51513	4.07881	2.87613	0.00547189	0.336908
ENST00000384528	1.37205	-1.44028	2.87612	0.00547204	0.336908
ENST00000484822	0.621727	5.18659	2.87656	0.00547216	0.336908
ENST00000581818	1.31386	-0.718124	2.87595	0.00548215	0.336908
ENST00000650311	0.623746	2.65894	2.87532	0.00548434	0.336908
ENST00000506275	1.50093	-0.893407	2.88258	0.00549146	0.336908
ENST00000625916	-1.11449	1.48591	-2.87484	0.00549174	0.336908
ENST00000472791	0.997896	0.972691	2.87456	0.00549594	0.336908
ENST00000644354	-1.22307	0.246	-2.87454	0.00550346	0.336908
ENST00000418539	-0.845373	12.3702	-2.87404	0.00550437	0.336908
ENST00000651989	-1.2966	2.41966	-2.87401	0.00550444	0.336908
ENST00000648755	0.94797	0.996583	2.87256	0.00552684	0.337724
ENST00000494735	-0.81845	4.6512	-2.87254	0.00552763	0.337724
ENST00000288548	-0.8124	3.60162	-2.87259	0.0055314	0.337724
ENST00000522760	1.61029	-1.00622	2.87181	0.00553849	0.337724
ENST00000305097	1.15603	2.47392	2.87167	0.00554052	0.337724
ENST00000410912	-1.0623	2.11753	-2.87123	0.00554747	0.337724
ENST00000428027	-1.06868	2.47444	-2.87205	0.00555472	0.337724
ENST00000405140	-1.27614	-0.74221	-2.87061	0.00555711	0.337724
ENST00000439765	-1.25551	2.4861	-2.87016	0.00556396	0.337724
ENST00000643403	1.17858	0.617196	2.86978	0.00556993	0.337724
ENST00000507457	-1.08558	0.394292	-2.86972	0.00557087	0.337724
ENST00000481499	-1.29493	-0.428129	-2.86929	0.00557751	0.337724
ENST00000307637	1.52364	-1.09926	2.8688	0.00558525	0.337724
ENST00000360844	1.59143	-1.55546	2.86874	0.00558618	0.337724
ENST00000464026	0.976102	1.43519	2.86858	0.00558863	0.337724
ENST00000427598	-1.37747	-0.0410904	-2.86934	0.00558892	0.337724
ENST00000558173	-0.630373	4.48131	-2.86743	0.00560669	0.337724
ENST00000510075	-1.24806	0.95628	-2.86743	0.00560671	0.337724
ENST00000636257	-1.35756	0.63674	-2.86722	0.00561104	0.337724
ENST00000553823	-1.34423	-0.171407	-2.86675	0.00561735	0.337724
ENST00000474766	-1.09739	2.42241	-2.86668	0.00561846	0.337724
ENST00000447136	-1.26762	0.785511	-2.86657	0.00562034	0.337724
ENST00000490185	1.17182	0.45707	2.86769	0.00562192	0.337724
ENST00000554527	1.21232	-1.69602	2.87005	0.00562262	0.337724
ENST00000430296	-1.28932	2.80977	-2.86622	0.00563304	0.338088
ENST00000563425	1.60919	-1.11599	2.86544	0.00563789	0.338116
ENST00000336375	1.45929	-1.81818	2.86491	0.00564625	0.338355
ENST00000483947	1.30465	-2.04576	2.86884	0.00565275	0.338466
ENST00000304402	-1.00887	2.48491	-2.86544	0.00565685	0.338466
ENST00000299977	0.592266	4.55211	2.86375	0.0056646	0.338547
ENST00000266746	-1.01067	1.83275	-2.86342	0.00566977	0.338547
ENST00000262283	-1.57072	-0.862447	-2.8636	0.00567135	0.338547
ENST00000527159	-0.977917	2.86555	-2.86251	0.00568411	0.338797
ENST00000495008	-0.705045	3.84528	-2.8625	0.00568431	0.338797
ENST00000371468	-1.13059	-0.295522	-2.86186	0.0056945	0.339143
ENST00000436645	-1.50632	-0.101361	-2.86156	0.0056993	0.339168
ENST00000269389	1.51458	-1.64262	2.86118	0.00570536	0.339267
ENST00000635725	-1.26083	-0.18124	-2.86089	0.00572667	0.340272
ENST00000410601	1.27344	-1.19434	2.8591	0.0057384	0.340708
ENST00000419661	1.1493	-0.835461	2.85866	0.00574551	0.340868
ENST00000614966	0.906899	1.24229	2.85796	0.00575678	0.341264
ENST00000643006	1.2524	0.178578	2.85821	0.00576101	0.341264
ENST00000305536	-1.02821	3.16608	-2.85607	0.00579191	0.342165
ENST00000368555	-0.703924	3.74498	-2.85558	0.00579502	0.342165
ENST00000423662	-1.20369	0.959071	-2.85584	0.00579986	0.342165
ENST00000537491	-1.23495	2.26722	-2.85525	0.00580036	0.342165
ENST00000509697	1.65997	-1.2386	2.85496	0.0058051	0.342165
ENST00000515270	-1.12499	1.02096	-2.85539	0.0058067	0.342165
ENST00000612837	-1.48322	0.0537525	-2.85534	0.0058081	0.342165
ENST00000600623	1.23933	-1.98662	2.85437	0.00581457	0.342165
ENST00000220062	1.45296	-0.372786	2.85428	0.00581607	0.342165
ENST00000651847	1.32658	-1.20994	2.85371	0.00582532	0.342449
ENST00000232564	1.06014	2.82537	2.85331	0.00583172	0.342565
ENST00000482831	-0.689772	3.37007	-2.85424	0.00584502	0.342812
ENST00000341411	1.77332	0.0849747	2.85232	0.00584782	0.342812
ENST00000555818	-0.648568	4.78542	-2.85279	0.00585758	0.342812
ENST00000368124	-0.858024	2.54119	-2.85158	0.00585989	0.342812
ENST00000448979	0.951557	0.554223	2.85079	0.0058728	0.342812
ENST00000575203	1.24879	-1.91252	2.85077	0.00587319	0.342812
ENST00000587581	-1.19827	-0.753425	-2.8507	0.00587433	0.342812
ENST00000311575	0.672715	3.66231	2.85111	0.00587569	0.342812
ENST00000565433	1.65633	-1.0314	2.85041	0.00587912	0.342812
ENST00000498056	-0.927071	1.99481	-2.85073	0.00588534	0.342812
ENST00000565177	1.26309	-1.32398	2.84951	0.00589386	0.342812
ENST00000532883	0.859981	1.65532	2.8513	0.00589892	0.342812
ENST00000646579	1.19332	-0.217472	2.84949	0.00589949	0.342812
ENST00000471619	-1.27193	0.0486745	-2.84957	0.00590312	0.342812
ENST00000380455	-0.618864	8.40356	-2.8489	0.00590379	0.342812
ENST00000217233	-1.09068	2.2298	-2.84871	0.00590688	0.342812
ENST00000575979	-1.30071	-0.358258	-2.84848	0.00592001	0.343316
ENST00000481312	1.54497	-0.157239	2.84758	0.00592554	0.343379
ENST00000383925	0.887101	2.43652	2.84715	0.00593255	0.343528
ENST00000629067	-1.47248	0.230582	-2.84734	0.00593858	0.34362
ENST00000496884	-0.697283	4.00265	-2.84613	0.00594953	0.343679
ENST00000609630	-0.73259	6.13982	-2.84603	0.00595112	0.343679
ENST00000460658	1.17068	0.870349	2.84592	0.00595293	0.343679
ENST00000358432	1.31383	1.14014	2.84411	0.00598301	0.344209
ENST00000310833	1.55819	0.874945	2.84406	0.00598379	0.344209
ENST00000503625	-1.33574	2.55547	-2.84391	0.00598681	0.344209
ENST00000494901	1.37757	0.295434	2.84386	0.00598774	0.344209
ENST00000444890	1.60911	-0.781437	2.84356	0.00599214	0.344209
ENST00000440347	-1.34573	-0.761145	-2.84424	0.00599271	0.344209
ENST00000556860	1.04679	1.12421	2.84347	0.00599377	0.344209
ENST00000509321	-1.09059	1.91624	-2.8438	0.00599792	0.344209
ENST00000602669	0.667541	3.45593	2.84295	0.0060026	0.344209
ENST00000540971	-1.00013	2.8863	-2.84269	0.00600664	0.344209
ENST00000648997	-1.40391	0.0631862	-2.84187	0.00602028	0.344628
ENST00000651588	1.29919	-1.58678	2.84233	0.00602288	0.344628
ENST00000502597	1.14836	-0.0434628	2.84059	0.00604179	0.345454
ENST00000421866	0.898621	1.52158	2.8402	0.00604837	0.345575
ENST00000626089	-1.17329	1.73391	-2.84	0.00605443	0.345666
ENST00000488149	-0.423558	6.78629	-2.83918	0.00607677	0.346685
ENST00000560323	1.20484	-1.15486	2.83838	0.00608166	0.346708
ENST00000362841	-1.09431	-1.12809	-2.83846	0.00612748	0.348918
ENST00000636704	-1.36477	0.137083	-2.83516	0.00613351	0.348918
ENST00000414379	1.499	-1.58504	2.83528	0.00613395	0.348918
ENST00000523632	1.01156	1.03872	2.8341	0.00615149	0.349483
ENST00000559347	1.02599	1.45982	2.83402	0.00615294	0.349483
ENST00000535721	-1.15665	0.625858	-2.83468	0.00615799	0.349489
ENST00000560141	-0.584595	4.93675	-2.83355	0.0061677	0.349489
ENST00000523964	1.21638	-0.0287012	2.83305	0.00616949	0.349489
ENST00000470782	1.06353	0.578037	2.84309	0.00617233	0.349489
ENST00000584684	0.990521	-0.561177	2.83258	0.00617755	0.349489
ENST00000526813	0.683764	3.19361	2.83512	0.00618169	0.349489
ENST00000651979	1.59034	-1.03085	2.83215	0.00618483	0.349489
ENST00000557781	1.40404	1.86691	2.83165	0.00619341	0.349489
ENST00000526024	-1.21746	-1.04981	-2.83134	0.0061987	0.349489
ENST00000539296	1.01656	2.40143	2.8313	0.00620095	0.349489
ENST00000520114	-1.09501	1.93466	-2.83125	0.00620635	0.349489
ENST00000524947	-1.34835	-1.17666	-2.83075	0.00620892	0.349489
ENST00000488545	1.14153	1.81912	2.83058	0.00621182	0.349489
ENST00000552403	1.22746	-0.146688	2.83029	0.0062168	0.349515
ENST00000649682	1.5166	-0.20949	2.82923	0.00623509	0.350185
ENST00000502559	1.3989	-1.13246	2.83552	0.00624001	0.350185
ENST00000570234	1.0138	0.33376	2.82881	0.0062423	0.350185
ENST00000384076	1.54619	-0.467397	2.82942	0.0062524	0.350497
ENST00000487162	1.41961	-0.176969	2.82743	0.00626626	0.350849
ENST00000369244	0.366363	5.90942	2.82705	0.00627283	0.350849
ENST00000590824	1.48249	-1.28958	2.83185	0.0062769	0.350849
ENST00000619960	1.17945	-0.0844001	2.82638	0.00628449	0.350849
ENST00000418005	-0.771874	3.18323	-2.82648	0.00629131	0.350849
ENST00000381655	-0.412911	8.42635	-2.82606	0.00629313	0.350849
ENST00000588072	0.976347	1.35213	2.82585	0.00629371	0.350849
ENST00000511112	-1.15843	1.09122	-2.82578	0.00629499	0.350849
ENST00000392993	0.345633	6.57938	2.82488	0.00631071	0.351058
ENST00000467365	-1.16941	-0.205471	-2.82452	0.00631699	0.351058
ENST00000616679	0.616172	5.65077	2.82518	0.00632717	0.351058
ENST00000398203	-1.16854	0.853963	-2.82348	0.00633516	0.351058
ENST00000394157	0.978841	1.11375	2.83038	0.00633759	0.351058
ENST00000562350	-0.860361	3.16965	-2.82329	0.00633859	0.351058
ENST00000395471	-1.25131	0.433127	-2.82322	0.00633975	0.351058
ENST00000295025	0.511568	4.52437	2.82316	0.00634082	0.351058
ENST00000637701	-1.28934	0.693045	-2.82324	0.00634416	0.351058
ENST00000636710	1.29417	-0.548039	2.82269	0.00634897	0.351058
ENST00000620616	-0.577627	4.65192	-2.82229	0.00635613	0.351058
ENST00000384955	1.37659	0.0537249	2.82221	0.00635979	0.351058
ENST00000606712	1.0393	1.16663	2.82888	0.00636495	0.351058
ENST00000424208	-0.610137	8.16842	-2.82141	0.00637162	0.351058
ENST00000518698	-1.57581	0.925269	-2.82125	0.00637441	0.351058
ENST00000427175	0.650553	4.20699	2.82157	0.00637678	0.351058
ENST00000504298	0.71447	3.58212	2.82265	0.00638198	0.351058
ENST00000489888	1.01815	1.47276	2.82051	0.00638743	0.351058
ENST00000367288	1.2612	0.679363	2.82037	0.00638989	0.351058
ENST00000551504	1.13582	-0.0632905	2.82027	0.00639168	0.351058
ENST00000486773	1.31666	-1.81569	2.82013	0.00639411	0.351058
ENST00000556515	0.66638	3.1662	2.81977	0.00640045	0.351157
ENST00000485503	1.30148	-1.53454	2.82329	0.00641861	0.351599
ENST00000372733	1.20406	1.7914	2.8186	0.00642132	0.351599
ENST00000624669	1.42637	-0.683521	2.81817	0.00642884	0.351599
ENST00000494718	-0.655839	3.28476	-2.81817	0.00643016	0.351599
ENST00000577429	-1.21403	-0.981592	-2.81863	0.00643132	0.351599
ENST00000479685	-1.2472	1.48612	-2.81783	0.00643709	0.351599
ENST00000546631	-1.14525	0.985031	-2.81757	0.00644035	0.351599
ENST00000361050	1.88179	1.78621	2.81701	0.00644952	0.351849
ENST00000452825	0.632322	2.97658	2.81747	0.00646124	0.351849
ENST00000439670	0.442426	4.40191	2.81582	0.00647145	0.351849
ENST00000484271	-1.28301	-0.956141	-2.81575	0.00647204	0.351849
ENST00000487659	0.643651	2.79108	2.81562	0.00647492	0.351849
ENST00000368482	1.5862	-1.42909	2.81553	0.00647594	0.351849
ENST00000618591	1.58133	-0.985729	2.81576	0.00647679	0.351849
ENST00000422819	-1.1915	-0.211243	-2.81435	0.00649713	0.352326
ENST00000511150	-1.31009	-1.209	-2.8143	0.00649798	0.352326
ENST00000493471	-0.81816	1.73667	-2.81419	0.00650001	0.352326
ENST00000570921	-1.50467	1.66527	-2.81397	0.00650379	0.352326
ENST00000453244	-0.73529	3.51722	-2.81352	0.00651197	0.352522
ENST00000495441	1.45544	1.202	2.81283	0.0065244	0.352835
ENST00000381894	-0.763376	4.1222	-2.81269	0.00652689	0.352835
ENST00000556632	1.08016	1.25595	2.81165	0.00654571	0.353411
ENST00000493380	-0.504254	5.78221	-2.81176	0.00654669	0.353411
ENST00000575958	-1.27976	-0.30169	-2.81123	0.00655323	0.353504
ENST00000480821	-1.48239	0.455914	-2.81151	0.00655755	0.353504
ENST00000383263	-1.04006	3.11795	-2.81082	0.00657255	0.353646
ENST00000443687	-1.41283	-0.417498	-2.80994	0.00657668	0.353646
ENST00000373322	-1.09951	0.958336	-2.80984	0.00657833	0.353646
ENST00000601380	-1.08448	1.47663	-2.80908	0.00659215	0.353646
ENST00000310455	1.39362	1.04748	2.80901	0.00659343	0.353646
ENST00000443467	-1.25012	-0.0106577	-2.80976	0.0065982	0.353646
ENST00000264657	0.605978	4.04615	2.80868	0.00659955	0.353646
ENST00000647827	-1.12364	-0.193044	-2.80859	0.00660216	0.353646
ENST00000564336	1.38149	-1.32174	2.80911	0.00660267	0.353646
ENST00000612851	-1.14108	0.752171	-2.80986	0.00660657	0.353646
ENST00000419702	1.47326	-1.19585	2.80824	0.00661141	0.353646
ENST00000608140	1.33433	1.17958	2.80768	0.00661776	0.353646
ENST00000264377	-0.510149	6.4717	-2.80832	0.00662316	0.353646
ENST00000508487	1.51047	-1.57913	2.80732	0.00662423	0.353646
ENST00000436070	1.02194	0.403917	2.80786	0.00663714	0.353952
ENST00000591434	-1.14529	0.480839	-2.80674	0.00664514	0.353952
ENST00000480906	0.769842	2.30884	2.80944	0.00665103	0.353952
ENST00000431432	-1.6902	-0.884925	-2.80634	0.00665272	0.353952
ENST00000597936	1.29797	-1.26435	2.8045	0.00667601	0.353952
ENST00000446962	1.18808	-2.10093	2.80419	0.00668166	0.353952
ENST00000649486	-1.31302	-0.897499	-2.80387	0.00668763	0.353952
ENST00000455294	1.01227	0.666634	2.8037	0.0066906	0.353952
ENST00000448680	-1.17597	0.870698	-2.80308	0.00670214	0.353952
ENST00000651871	-1.68274	0.801572	-2.80378	0.00670254	0.353952
ENST00000515592	-0.564407	3.16285	-2.80291	0.00670522	0.353952
ENST00000435169	-1.27008	-0.387047	-2.80243	0.00671425	0.353952
ENST00000472025	1.24906	-0.0319409	2.80684	0.00671924	0.353952
ENST00000510701	1.3807	-1.02188	2.80607	0.00671993	0.353952
ENST00000614090	-1.15908	3.75356	-2.80184	0.00672857	0.353952
ENST00000597564	-1.23574	1.04598	-2.80368	0.00673549	0.353952
ENST00000595800	1.22243	-2.04188	2.80094	0.00674168	0.353952
ENST00000561209	-1.24237	2.1104	-2.80131	0.00674185	0.353952
ENST00000487031	-1.37448	-0.00508877	-2.80093	0.00674478	0.353952
ENST00000652183	-0.562194	4.5008	-2.80063	0.00674744	0.353952
ENST00000556499	-0.642759	4.43958	-2.80132	0.00674752	0.353952
ENST00000554360	0.406137	6.00961	2.80071	0.00674951	0.353952
ENST00000536829	1.16345	-2.08395	2.80359	0.00675029	0.353952
ENST00000263431	-0.955246	6.08346	-2.80048	0.00675116	0.353952
ENST00000478380	1.45997	-1.29984	2.80314	0.00675132	0.353952
ENST00000367876	0.697912	2.61327	2.80036	0.00675254	0.353952
ENST00000506979	1.15072	-1.95441	2.80024	0.00675474	0.353952
ENST00000608367	1.09664	-2.02049	2.80006	0.00675816	0.353952
ENST00000282670	-1.04202	2.03639	-2.80008	0.00676899	0.354279
ENST00000520623	-1.10807	2.35621	-2.79962	0.00677846	0.354534
ENST00000465288	1.20109	0.0168707	2.79804	0.00679568	0.35491
ENST00000374003	1.46267	-0.189605	2.79768	0.0068024	0.35491
ENST00000373467	1.04498	3.72727	2.79806	0.00680782	0.35491
ENST00000374757	-0.733784	2.63003	-2.79723	0.00681092	0.35491
ENST00000424943	1.33497	-0.301591	2.79699	0.0068154	0.35491
ENST00000340652	-0.539108	6.67649	-2.79696	0.00681606	0.35491
ENST00000649903	1.29307	-1.44188	2.79686	0.00681778	0.35491
ENST00000511495	-0.98113	1.04353	-2.7963	0.00682831	0.355219
ENST00000470985	-1.30381	0.319976	-2.79643	0.00684249	0.355608
ENST00000461450	1.45398	-1.12697	2.79525	0.00684932	0.355608
ENST00000340923	1.39014	-0.785376	2.79524	0.00685339	0.355608
ENST00000537616	0.603595	4.06212	2.79587	0.00685418	0.355608
ENST00000560994	-1.37506	-1.21942	-2.7929	0.00689278	0.35737
ENST00000503693	-1.17111	1.20122	-2.79251	0.00689992	0.357501
ENST00000519610	-0.570197	4.34374	-2.79205	0.00690858	0.35771
ENST00000505123	-1.41001	0.702459	-2.79223	0.00693047	0.358016
ENST00000450370	1.42688	-1.03645	2.79048	0.00693848	0.358016
ENST00000248248	0.386778	5.19744	2.79022	0.00694333	0.358016
ENST00000608984	0.925499	1.42679	2.79002	0.00694732	0.358016
ENST00000368364	1.34281	0.835617	2.78991	0.00694941	0.358016
ENST00000507023	1.01578	1.63081	2.78956	0.00695594	0.358016
ENST00000553443	-1.37466	2.85377	-2.79031	0.00695717	0.358016
ENST00000586389	0.69319	2.89466	2.78949	0.00695855	0.358016
ENST00000540506	1.38034	-0.882829	2.78833	0.00697948	0.358016
ENST00000548720	-0.99617	2.39027	-2.78799	0.00698599	0.358016
ENST00000641631	0.993499	0.478423	2.7876	0.00699362	0.358016
ENST00000496166	1.44151	-1.4296	2.79	0.00699501	0.358016
ENST00000556673	1.22114	-2.03063	2.78725	0.00700016	0.358016
ENST00000320672	0.578739	4.66465	2.78722	0.00700089	0.358016
ENST00000380858	-0.737468	4.22226	-2.78724	0.00700151	0.358016
ENST00000649872	1.27801	-1.42878	2.78707	0.00700369	0.358016
ENST00000244709	1.31192	-1.76285	2.78705	0.00700407	0.358016
ENST00000615437	-1.02623	2.33768	-2.78704	0.00700435	0.358016
ENST00000403538	1.21171	-1.84605	2.78674	0.00701491	0.358016
ENST00000515292	-1.16642	-1.35963	-2.78648	0.00701497	0.358016
ENST00000538231	-1.45939	0.375874	-2.78637	0.00701721	0.358016
ENST00000541244	-0.85987	2.65523	-2.78636	0.00701741	0.358016
ENST00000473800	1.38232	0.71843	2.78698	0.007021	0.358016
ENST00000489632	1.46936	-1.34889	2.78588	0.00702654	0.358061
ENST00000520132	0.744932	1.93735	2.79495	0.00703681	0.358198
ENST00000591756	1.30736	-1.41003	2.7857	0.00704888	0.358198
ENST00000638053	0.476721	5.57084	2.78428	0.00705749	0.358198
ENST00000493163	1.25967	-0.416517	2.78426	0.007058	0.358198
ENST00000477922	1.51663	-0.515902	2.78419	0.00705926	0.358198
ENST00000622183	-0.856642	3.54507	-2.7851	0.00706048	0.358198
ENST00000302277	-0.865126	4.51347	-2.78425	0.00706164	0.358198
ENST00000263238	0.468852	4.54849	2.78281	0.00708599	0.359197
ENST00000374945	-1.01216	2.00419	-2.78232	0.00709555	0.359446
ENST00000426923	1.22224	-1.76043	2.78197	0.00710237	0.359547
ENST00000549926	-0.818045	2.77739	-2.7837	0.00711287	0.359547
ENST00000513095	1.42785	-1.38106	2.78121	0.00711719	0.359547
ENST00000521150	-1.27439	-0.310964	-2.78119	0.0071176	0.359547
ENST00000562971	1.19449	-0.0783173	2.78102	0.00712081	0.359547
ENST00000487180	-1.18395	-1.59532	-2.783	0.00712589	0.359569
ENST00000436443	-1.15616	1.49505	-2.78037	0.00713551	0.35982
ENST00000475946	1.0729	3.62032	2.78821	0.00714133	0.359847
ENST00000317757	-1.39721	2.32491	-2.78063	0.0071474	0.359847
ENST00000575484	-0.76763	3.35622	-2.77952	0.00715022	0.359847
ENST00000469089	0.790106	1.81729	2.77921	0.00715621	0.359847
ENST00000530015	1.43787	3.07441	2.78838	0.00715934	0.359847
ENST00000441416	-1.87309	0.384127	-2.77962	0.00716581	0.359939
ENST00000568086	-1.1479	-0.59841	-2.77827	0.00717483	0.360156
ENST00000584285	-1.31857	0.418504	-2.77776	0.00718486	0.360156
ENST00000446498	1.30057	-0.152851	2.77731	0.00719502	0.360156
ENST00000460968	1.12997	-1.39172	2.78281	0.00719549	0.360156
ENST00000557379	-0.75196	3.49591	-2.77722	0.00719551	0.360156
ENST00000441558	1.39257	-0.912105	2.77708	0.00719809	0.360156
ENST00000507213	-0.881584	2.4249	-2.77681	0.00721525	0.360781
ENST00000242728	0.410568	6.62453	2.77558	0.00722786	0.361178
ENST00000589130	-1.44873	-0.509276	-2.77516	0.00723609	0.361356
ENST00000443659	-0.585809	3.98904	-2.77479	0.00724502	0.361434
ENST00000370882	1.21719	0.687138	2.77461	0.007247	0.361434
ENST00000479915	1.32042	0.943476	2.77469	0.0072536	0.36153
ENST00000504475	1.41348	2.41889	2.77988	0.00726429	0.361678
ENST00000625028	-1.23146	3.17956	-2.77419	0.00726842	0.361678
ENST00000479467	1.11446	0.0238768	2.77305	0.00727795	0.361678
ENST00000473232	-1.1418	0.97007	-2.7722	0.00729489	0.361678
ENST00000470652	1.18953	-2.06806	2.77201	0.00729865	0.361678
ENST00000412426	1.2431	-0.335807	2.77279	0.00730464	0.361678
ENST00000618775	-0.837635	4.36333	-2.77167	0.00730554	0.361678
ENST00000308537	1.10153	0.267431	2.77166	0.00730579	0.361678
ENST00000257836	1.12109	0.626115	2.77156	0.00730765	0.361678
ENST00000469904	-1.28401	-0.956628	-2.77142	0.00731046	0.361678
ENST00000496921	0.448216	4.08566	2.77101	0.00731871	0.361678
ENST00000381118	1.00879	1.34255	2.77081	0.00732269	0.361678
ENST00000590180	0.695949	2.64024	2.77178	0.00732288	0.361678
ENST00000581700	1.23795	-1.93937	2.77053	0.00732841	0.361678
ENST00000432334	1.25718	-1.20432	2.7703	0.00733293	0.361678
ENST00000558177	1.17781	-2.03154	2.7703	0.00733441	0.361678
ENST00000478009	-0.999001	1.98906	-2.77045	0.00733894	0.361678
ENST00000469969	-0.991459	1.70029	-2.77011	0.00734079	0.361678
ENST00000525065	0.608849	3.39318	2.7732	0.00734636	0.361722
ENST00000555157	1.21947	-1.60313	2.77068	0.00736606	0.361809
ENST00000466400	-0.903268	2.2959	-2.7686	0.00736724	0.361809
ENST00000475466	-1.29879	-0.938352	-2.77012	0.00737142	0.361809
ENST00000361357	0.4012	4.75958	2.76833	0.00737262	0.361809
ENST00000527254	1.08242	-2.0217	2.76832	0.00737283	0.361809
ENST00000273814	-1.05526	2.36204	-2.76815	0.00737621	0.361809
ENST00000301740	0.370638	10.6476	2.768	0.00738228	0.361877
ENST00000431431	1.03205	2.19264	2.76739	0.00739144	0.362019
ENST00000490466	1.11608	-1.95082	2.76724	0.00739455	0.362019
ENST00000511742	1.2703	-0.351854	2.76704	0.00739935	0.362025
ENST00000496064	1.32509	-0.880365	2.76608	0.00741807	0.362428
ENST00000422138	-1.18108	2.43803	-2.76678	0.00742367	0.362428
ENST00000446445	-1.2214	0.912076	-2.76576	0.00742457	0.362428
ENST00000422374	1.51582	-0.749247	2.76797	0.00742635	0.362428
ENST00000600936	-0.61712	4.50596	-2.76445	0.00745101	0.363203
ENST00000546745	1.21673	-1.78019	2.76437	0.00745271	0.363203
ENST00000521638	1.19215	-2.06141	2.76496	0.00745917	0.363203
ENST00000400237	-1.37192	2.20468	-2.76378	0.00746471	0.363203
ENST00000496764	-0.762936	4.13012	-2.76382	0.00746572	0.363203
ENST00000470369	1.45877	-1.13052	2.76258	0.00748923	0.363442
ENST00000555222	1.32904	-0.6792	2.76252	0.00749052	0.363442
ENST00000576204	1.27751	0.218835	2.76236	0.0074976	0.363442
ENST00000581425	-1.55076	2.60292	-2.76252	0.0075026	0.363442
ENST00000254508	-0.397582	7.30265	-2.7619	0.0075031	0.363442
ENST00000576222	1.13767	0.454972	2.76581	0.00750525	0.363442
ENST00000543615	1.1842	-1.95651	2.7618	0.00750528	0.363442
ENST00000652542	-0.734803	4.97645	-2.76148	0.00751338	0.363442
ENST00000441293	0.773999	2.59849	2.77654	0.00751986	0.363442
ENST00000647806	1.46375	1.36252	2.76094	0.00752281	0.363442
ENST00000298119	-0.406357	6.58928	-2.76081	0.00752557	0.363442
ENST00000574829	1.20212	-1.22788	2.7607	0.00752785	0.363442
ENST00000650889	-1.40471	-0.221657	-2.75995	0.00754328	0.363442
ENST00000254958	0.691468	5.4431	2.75994	0.0075447	0.363442
ENST00000555289	1.35729	-1.74924	2.7597	0.00754837	0.363442
ENST00000508743	1.17107	-0.162001	2.75962	0.00754995	0.363442
ENST00000646779	1.28284	-1.81185	2.75959	0.00755056	0.363442
ENST00000412589	-0.97883	2.69544	-2.75886	0.00757571	0.363944
ENST00000614398	-1.1753	-0.946077	-2.75836	0.00757592	0.363944
ENST00000648033	0.675664	3.26114	2.75832	0.00757689	0.363944
ENST00000427290	1.25127	-1.64935	2.75804	0.00758268	0.363944
ENST00000377732	-1.29873	-0.0810518	-2.75795	0.00758452	0.363944
ENST00000494914	-1.21132	-1.59045	-2.7572	0.00760005	0.364077
ENST00000451814	1.21322	-1.83531	2.75704	0.00760333	0.364077
ENST00000620288	1.49695	0.0280084	2.75695	0.00760521	0.364077
ENST00000620662	0.929255	1.62882	2.7569	0.00760613	0.364077
ENST00000581054	1.20253	0.548308	2.75664	0.00761149	0.364108
ENST00000449630	-1.17195	-0.514567	-2.75637	0.0076172	0.364156
ENST00000473883	1.46798	0.623534	2.75592	0.00762663	0.364247
ENST00000514990	1.21333	1.03838	2.75823	0.00762853	0.364247
ENST00000557543	0.492789	4.11425	2.75925	0.00763749	0.36445
ENST00000569174	0.646124	2.73501	2.75435	0.00765946	0.365273
ENST00000407149	-1.20649	-1.80484	-2.75321	0.00768296	0.365594
ENST00000470364	0.826873	2.20287	2.75317	0.00768394	0.365594
ENST00000384729	-0.678977	6.81182	-2.75332	0.00769284	0.365594
ENST00000488562	-0.998471	3.035	-2.75361	0.00769373	0.365594
ENST00000382531	-1.21988	0.0262267	-2.75343	0.00769414	0.365594
ENST00000238138	-0.870655	2.29348	-2.75266	0.00769458	0.365594
ENST00000559216	0.934962	1.34574	2.75229	0.00770229	0.365736
ENST00000566325	1.23293	-1.84675	2.75196	0.00770926	0.365842
ENST00000507424	-0.682366	4.51123	-2.7516	0.0077167	0.365889
ENST00000528511	1.01789	0.899888	2.75176	0.00771972	0.365889
ENST00000591258	1.213	0.455077	2.75072	0.00773531	0.366403
ENST00000398525	-0.742485	3.28721	-2.75032	0.00774375	0.366501
ENST00000459972	1.57719	-0.900666	2.751	0.00774686	0.366501
ENST00000254286	-1.19186	0.598571	-2.74994	0.00775696	0.366755
ENST00000649654	1.23152	0.527376	2.74886	0.00777486	0.367278
ENST00000433581	1.44658	-0.513649	2.7489	0.00777754	0.367278
ENST00000440421	1.19844	-1.27946	2.74784	0.0077962	0.367815
ENST00000472943	-0.975468	3.27424	-2.74846	0.0077992	0.367815
ENST00000491083	1.2949	1.26925	2.74709	0.00781215	0.367815
ENST00000558106	-1.21004	0.542362	-2.74694	0.00781537	0.367815
ENST00000396049	0.525407	4.97418	2.74711	0.00781554	0.367815
ENST00000533625	-1.31794	2.97636	-2.74689	0.00782905	0.367815
ENST00000370855	-0.625571	5.08187	-2.74701	0.00783628	0.367815
ENST00000430250	1.05349	0.54927	2.75236	0.0078402	0.367815
ENST00000394240	-1.12564	-0.561493	-2.74554	0.00784511	0.367815
ENST00000377325	-0.848789	3.94236	-2.74574	0.00784543	0.367815
ENST00000643915	1.28784	-0.469651	2.74548	0.00784648	0.367815
ENST00000374637	1.15615	-2.00417	2.74491	0.00785845	0.367815
ENST00000316881	0.514136	4.61517	2.74444	0.00786868	0.367815
ENST00000520393	-1.18615	2.59912	-2.74435	0.00787062	0.367815
ENST00000511524	-1.19278	0.585133	-2.74497	0.00787345	0.367815
ENST00000560995	-0.934743	1.38775	-2.74453	0.00787394	0.367815
ENST00000541419	-1.38134	-0.133781	-2.74393	0.00787941	0.367815
ENST00000251181	-1.25602	0.433111	-2.74391	0.00788223	0.367815
ENST00000443317	1.19722	-0.257496	2.7438	0.00788236	0.367815
ENST00000400362	-0.391066	6.16958	-2.74335	0.00789197	0.367815
ENST00000430067	1.28379	-0.864769	2.74324	0.00789913	0.367815
ENST00000355219	1.51205	-1.31277	2.74301	0.00789935	0.367815
ENST00000485984	-1.2202	1.278	-2.74283	0.00790535	0.367815
ENST00000476492	1.43166	-1.02789	2.74261	0.00790784	0.367815
ENST00000381440	0.824116	4.092	2.7432	0.00790785	0.367815
ENST00000619092	-0.37934	5.69553	-2.74315	0.00791329	0.367846
ENST00000264156	0.671968	4.24832	2.74203	0.00792041	0.367881
ENST00000589384	-0.827875	1.67311	-2.74188	0.00792354	0.367881
ENST00000503115	-1.19946	-0.713492	-2.7423	0.00793904	0.368152
ENST00000457174	1.31097	-0.662493	2.74103	0.00794192	0.368152
ENST00000644313	1.14461	0.770913	2.74121	0.00794367	0.368152
ENST00000317147	0.751138	2.28572	2.74475	0.00795582	0.368228
ENST00000594656	-0.742025	2.67539	-2.74023	0.00795911	0.368228
ENST00000571457	1.43163	-0.140145	2.74021	0.0079596	0.368228
ENST00000546530	-1.25965	-0.598794	-2.73945	0.00797594	0.368763
ENST00000332359	-0.840066	4.82719	-2.73884	0.00799252	0.369098
ENST00000367268	-1.31992	0.868565	-2.73908	0.00799487	0.369098
ENST00000520266	-0.799392	1.94293	-2.73846	0.0079975	0.369098
ENST00000523012	-0.465111	5.04435	-2.73808	0.00800579	0.369239
ENST00000490872	1.31578	-1.38779	2.73777	0.00801255	0.369239
ENST00000524768	0.871972	1.5319	2.7372	0.00802488	0.369239
ENST00000431473	-0.439408	6.7825	-2.73802	0.00802838	0.369239
ENST00000306336	0.458118	5.19759	2.737	0.00802912	0.369239
ENST00000430745	-0.674824	4.65894	-2.737	0.00802923	0.369239
ENST00000326621	1.3266	-1.2672	2.73594	0.0080523	0.369906
ENST00000494448	1.25712	-0.924121	2.7359	0.0080533	0.369906
ENST00000426282	-0.583215	4.06025	-2.73544	0.00806771	0.369927
ENST00000647649	1.11554	1.00921	2.73484	0.00807651	0.369927
ENST00000370274	1.22566	-0.352844	2.73461	0.00808137	0.369927
ENST00000614978	-1.38118	0.657731	-2.7349	0.00808539	0.369927
ENST00000484624	0.877083	1.55484	2.73441	0.00808574	0.369927
ENST00000584818	1.22783	-0.867864	2.73425	0.00808939	0.369927
ENST00000557291	-1.2884	2.01731	-2.73532	0.00809046	0.369927
ENST00000491277	1.4241	0.578618	2.73413	0.00809203	0.369927
ENST00000577309	-0.987114	1.85405	-2.7338	0.0080993	0.37004
ENST00000618281	-1.22519	-0.51449	-2.73337	0.00810878	0.370254
ENST00000398073	0.542298	5.95622	2.73528	0.00811648	0.370388
ENST00000554980	0.99797	1.30944	2.73828	0.00812461	0.370486
ENST00000461751	1.4507	-1.43915	2.73248	0.00812822	0.370486
ENST00000375654	0.700638	2.66972	2.73171	0.0081452	0.370577
ENST00000415465	1.26535	-1.10655	2.73169	0.0081458	0.370577
ENST00000652759	-1.30285	1.14553	-2.73171	0.00814625	0.370577
ENST00000565665	-1.16309	-0.249233	-2.73152	0.00814939	0.370577
ENST00000538174	1.18137	0.216127	2.73128	0.00815467	0.370599
ENST00000522386	-1.1829	1.44305	-2.73187	0.00816079	0.370659
ENST00000590035	-0.865664	2.10759	-2.73091	0.00818181	0.37067
ENST00000491850	1.16731	-0.395941	2.72986	0.00818618	0.37067
ENST00000264824	1.61987	0.735841	2.72964	0.00819107	0.37067
ENST00000466584	-1.1319	2.05559	-2.72931	0.00819848	0.37067
ENST00000516344	-0.963796	2.77327	-2.72957	0.00820642	0.37067
ENST00000396224	-1.14872	-1.58424	-2.72888	0.00820788	0.37067
ENST00000329293	1.27977	-1.39525	2.72868	0.00821249	0.37067
ENST00000586726	-1.29444	0.848987	-2.72953	0.00821352	0.37067
ENST00000540689	0.973233	1.66458	2.72851	0.00821613	0.37067
ENST00000533136	1.32756	-0.833354	2.72851	0.00821627	0.37067
ENST00000483969	1.20233	-2.05026	2.7285	0.00821641	0.37067
ENST00000591750	1.25153	-0.394401	2.7284	0.00821858	0.37067
ENST00000587535	1.26876	-1.27968	2.72713	0.00824687	0.37098
ENST00000489677	-1.12916	-1.54767	-2.72701	0.00824971	0.37098
ENST00000484990	1.23388	-1.87126	2.72674	0.00825557	0.37098
ENST00000370076	-1.24684	-1.19251	-2.72684	0.00825602	0.37098
ENST00000469966	-1.11683	0.918812	-2.72762	0.00825708	0.37098
ENST00000463698	-0.79831	2.34571	-2.72776	0.00825845	0.37098
ENST00000261461	0.606702	4.20565	2.72662	0.00825903	0.37098
ENST00000488857	-0.841827	2.35028	-2.72636	0.00826522	0.371042
ENST00000509430	-1.09168	-0.531197	-2.72586	0.00827544	0.371078
ENST00000464132	1.07848	1.67285	2.72584	0.00827575	0.371078
ENST00000453413	1.30545	-1.41529	2.72544	0.00828475	0.371078
ENST00000374446	-1.40479	0.361658	-2.72542	0.00828521	0.371078
ENST00000651201	-1.234	-0.228582	-2.72479	0.00830069	0.371103
ENST00000469087	1.61047	-0.548708	2.72462	0.00830325	0.371103
ENST00000381501	-0.9747	2.65034	-2.72524	0.00831324	0.371103
ENST00000448127	-0.746828	3.18504	-2.72495	0.00831325	0.371103
ENST00000637498	0.69607	2.60098	2.72403	0.00831638	0.371103
ENST00000491453	-1.2042	-0.234305	-2.72387	0.00832013	0.371103
ENST00000522534	-1.17773	-0.503303	-2.72386	0.00832035	0.371103
ENST00000540541	0.934278	1.61549	2.72369	0.00832417	0.371103
ENST00000504915	-0.757755	2.55965	-2.72342	0.00833014	0.371154
ENST00000478904	-1.08041	1.01758	-2.7228	0.00835234	0.371929
ENST00000560402	1.07637	1.51121	2.72185	0.00837027	0.372349
ENST00000482601	-1.05464	1.32019	-2.72233	0.00837141	0.372349
ENST00000545146	-1.07756	-1.67743	-2.72187	0.00837727	0.372396
ENST00000510504	-1.09643	2.2135	-2.72057	0.00839455	0.372619
ENST00000466407	0.668234	2.94856	2.72089	0.00839711	0.372619
ENST00000525672	1.25103	-1.58913	2.72018	0.00840358	0.372619
ENST00000642601	1.08371	-2.04226	2.71978	0.00841246	0.372619
ENST00000292823	-1.04902	-0.434003	-2.71965	0.00841559	0.372619
ENST00000637980	-1.33076	2.18832	-2.72027	0.00841589	0.372619
ENST00000476862	1.35335	-1.4331	2.71904	0.0084294	0.372619
ENST00000382740	-1.24126	0.248212	-2.71959	0.00843787	0.372619
ENST00000618889	-0.610288	6.13441	-2.71978	0.00843811	0.372619
ENST00000646260	-1.14191	1.47218	-2.71846	0.00844255	0.372619
ENST00000521394	1.03258	2.10421	2.71824	0.00844792	0.372619
ENST00000469572	-1.5023	0.113138	-2.71821	0.00844841	0.372619
ENST00000524533	1.11155	-2.08409	2.71792	0.00845501	0.372619
ENST00000580979	1.05271	1.70693	2.71782	0.00845724	0.372619
ENST00000510382	-0.520484	4.56282	-2.71899	0.008459	0.372619
ENST00000318602	1.28123	3.40569	2.71821	0.00846302	0.372619
ENST00000465667	-1.09694	0.215142	-2.71744	0.00846603	0.372619
ENST00000353234	-0.421465	6.69581	-2.7178	0.00847233	0.372619
ENST00000527648	-1.28952	0.115316	-2.71934	0.00847387	0.372619
ENST00000444717	1.17053	-0.43556	2.71688	0.00847871	0.37262
ENST00000284984	1.15862	3.32617	2.71644	0.00848889	0.372765
ENST00000437627	1.27791	-0.0337411	2.71636	0.00849167	0.372765
ENST00000498318	0.9753	1.09613	2.71498	0.0085239	0.372948
ENST00000463611	-0.7507	3.45672	-2.71524	0.00852579	0.372948
ENST00000575147	1.28491	-1.56314	2.71471	0.00852848	0.372948
ENST00000284154	1.42024	-0.782432	2.71481	0.00852893	0.372948
ENST00000296839	1.11665	2.30814	2.71465	0.00853002	0.372948
ENST00000434967	1.07691	0.739025	2.71444	0.00853481	0.372948
ENST00000595897	0.768913	2.61612	2.71436	0.00853657	0.372948
ENST00000375213	1.27897	-1.527	2.71428	0.00853885	0.372948
ENST00000583739	1.29104	1.26563	2.71552	0.00853924	0.372948
ENST00000196169	-1.30345	0.779806	-2.71352	0.00855609	0.373473
ENST00000591711	-1.26533	-0.182878	-2.71391	0.00856431	0.373566
ENST00000463997	0.636139	3.70072	2.71295	0.00857306	0.373566
ENST00000406397	-0.538032	4.58755	-2.7126	0.00857729	0.373566
ENST00000586801	-0.719293	4.90854	-2.71259	0.00857757	0.373566
ENST00000650347	1.29288	-0.0942584	2.71219	0.00858684	0.373636
ENST00000608842	-1.55384	0.485862	-2.71207	0.00858957	0.373636
ENST00000371384	0.549535	5.88057	2.7118	0.008596	0.373636
ENST00000568093	0.898331	3.17688	2.71186	0.00859851	0.373636
ENST00000523006	-0.881322	4.79731	-2.71102	0.00861478	0.373809
ENST00000586076	1.46925	-0.44274	2.71093	0.00861596	0.373809
ENST00000481679	1.20075	-1.7589	2.71135	0.00861698	0.373809
ENST00000625056	1.14949	-1.95336	2.71054	0.00862516	0.373953
ENST00000584643	0.618771	4.02049	2.71037	0.00864313	0.374386
ENST00000520161	1.32396	-1.78599	2.7094	0.0086517	0.374386
ENST00000649951	1.19374	0.51354	2.70975	0.00865178	0.374386
ENST00000557959	1.3561	-1.05366	2.70949	0.00865556	0.374386
ENST00000216121	-0.399298	5.96601	-2.71079	0.00865934	0.374386
ENST00000521268	-1.32567	-0.470179	-2.70849	0.00867285	0.374587
ENST00000490537	0.924748	1.41723	2.70846	0.00867368	0.374587
ENST00000543307	1.34474	-1.35806	2.70738	0.00870232	0.374854
ENST00000581659	-0.827283	5.85653	-2.70702	0.0087073	0.374854
ENST00000602436	1.16847	1.82642	2.70701	0.00870749	0.374854
ENST00000263228	0.27966	6.65378	2.70688	0.00871064	0.374854
ENST00000267549	1.55869	-0.360039	2.70756	0.00871324	0.374854
ENST00000524822	0.818935	1.3924	2.70667	0.00871561	0.374854
ENST00000586407	1.03463	0.469521	2.70653	0.00871898	0.374854
ENST00000387456	1.26817	-1.69699	2.70652	0.00871919	0.374854
ENST00000553253	-1.20039	0.0965332	-2.70614	0.00872796	0.374854
ENST00000497229	-0.940343	4.11315	-2.70595	0.00873259	0.374854
ENST00000439327	1.19337	0.573531	2.70612	0.00874329	0.374854
ENST00000549866	-0.630368	5.05091	-2.70545	0.00874418	0.374854
ENST00000476825	-1.13466	1.14723	-2.7056	0.0087442	0.374854
ENST00000567372	-1.20452	-0.0143408	-2.70522	0.00874979	0.374854
ENST00000416717	1.19127	-0.326069	2.70517	0.00875859	0.374854
ENST00000369155	1.05111	3.13044	2.70456	0.00876758	0.374854
ENST00000262995	1.05026	3.64945	2.70445	0.00876776	0.374854
ENST00000483067	1.0528	-2.12034	2.70428	0.00877181	0.374854
ENST00000327939	-2.13846	1.90636	-2.70487	0.00877201	0.374854
ENST00000584167	1.1685	-1.96116	2.70388	0.00878132	0.374922
ENST00000423281	-1.35504	1.97226	-2.7042	0.00878669	0.374922
ENST00000304636	1.19016	1.16193	2.70341	0.00879248	0.374922
ENST00000546910	1.58111	-1.14344	2.70668	0.00879412	0.374922
ENST00000427542	-1.43435	1.76868	-2.70376	0.00879979	0.374922
ENST00000479273	-1.18679	-0.121509	-2.70298	0.00880269	0.374922
ENST00000360104	0.379895	4.54911	2.6999	0.00887602	0.377721
ENST00000432673	1.32747	-0.756116	2.708	0.00887819	0.377721
ENST00000376682	1.27851	-1.42132	2.69929	0.0088905	0.377825
ENST00000244537	1.25427	0.23235	2.69889	0.00890068	0.377825
ENST00000425030	0.816798	3.10396	2.69881	0.0089019	0.377825
ENST00000652292	0.727005	3.1158	2.6986	0.00890715	0.377825
ENST00000502125	1.16481	4.73889	2.69866	0.00890799	0.377825
ENST00000540563	-1.40399	-0.763491	-2.6989	0.00891226	0.377825
ENST00000338302	1.25398	-1.60513	2.69819	0.00891691	0.377825
ENST00000394685	1.26515	-1.79201	2.69792	0.00892339	0.377825
ENST00000252486	0.947185	1.52647	2.69754	0.0089325	0.377825
ENST00000404299	-1.06427	-0.276195	-2.6974	0.00893576	0.377825
ENST00000624065	1.62488	-1.00813	2.69728	0.00893882	0.377825
ENST00000464800	-0.952737	1.35696	-2.69738	0.00893928	0.377825
ENST00000340356	1.4063	0.5997	2.69631	0.00896204	0.378574
ENST00000483367	-1.15765	-1.20895	-2.69643	0.00896679	0.378574
ENST00000637084	-0.55871	5.48388	-2.69552	0.00898124	0.378977
ENST00000361682	0.893816	1.04441	2.69515	0.00898994	0.379137
ENST00000380217	-1.10212	0.341854	-2.69468	0.00900678	0.379339
ENST00000554960	-1.15082	1.14442	-2.69531	0.0090091	0.379339
ENST00000563748	-0.644962	6.08469	-2.69471	0.00900945	0.379339
ENST00000443295	1.11096	0.315582	2.69399	0.00901819	0.3795
ENST00000599476	1.18487	0.3406	2.69361	0.00902726	0.379675
ENST00000464829	-1.33645	-0.231957	-2.69333	0.00903405	0.379739
ENST00000515151	1.0333	-0.209848	2.6931	0.00903968	0.379739
ENST00000441361	-1.00846	1.30383	-2.69272	0.00904882	0.379739
ENST00000326571	-1.44436	0.360407	-2.69276	0.00904913	0.379739
ENST00000528046	0.933569	2.23751	2.69316	0.00905333	0.379739
ENST00000617415	0.388472	6.15939	2.69131	0.00908317	0.380341
ENST00000521762	-1.0934	1.87783	-2.69141	0.00908978	0.380341
ENST00000407215	-0.904772	2.04426	-2.69068	0.00909895	0.380341
ENST00000558844	0.898189	1.14167	2.69024	0.00910937	0.380341
ENST00000378927	-0.623352	2.95328	-2.68975	0.00912152	0.380341
ENST00000581211	-1.22692	-0.671631	-2.6894	0.00912988	0.380341
ENST00000426837	0.847309	4.10055	2.68932	0.0091319	0.380341
ENST00000502864	1.52767	0.60339	2.68912	0.00913684	0.380341
ENST00000588516	-0.910025	2.92589	-2.68991	0.00914041	0.380341
ENST00000468623	1.24996	-1.02279	2.68897	0.00914062	0.380341
ENST00000502315	1.185	-1.46015	2.68896	0.00914075	0.380341
ENST00000418797	-1.0944	-1.69333	-2.68866	0.00914806	0.380341
ENST00000546425	1.20702	-1.8617	2.68885	0.00915557	0.380341
ENST00000601148	-1.14664	-1.07819	-2.68823	0.00915877	0.380341
ENST00000462717	1.24584	-0.00317749	2.68816	0.00916045	0.380341
ENST00000625181	-1.25764	1.49714	-2.6878	0.00916916	0.380341
ENST00000526677	1.73732	-0.0915054	2.70161	0.0091733	0.380341
ENST00000488425	-1.28951	-0.767537	-2.68731	0.00918124	0.380341
ENST00000487710	1.19441	-0.705902	2.68728	0.00918201	0.380341
ENST00000594696	0.915473	0.947633	2.6869	0.00919133	0.380341
ENST00000519647	1.31496	-1.19925	2.68658	0.00919927	0.380341
ENST00000533841	1.22019	-1.24061	2.68636	0.0092107	0.380341
ENST00000496727	-1.15405	0.373194	-2.68597	0.00921449	0.380341
ENST00000392929	-1.3787	-0.468282	-2.68592	0.00921552	0.380341
ENST00000587817	0.774918	3.75003	2.68593	0.00921616	0.380341
ENST00000631265	1.20132	-1.1468	2.68576	0.00921957	0.380341
ENST00000572476	1.1758	-1.75849	2.68557	0.00922419	0.380341
ENST00000561679	-0.57423	4.69685	-2.68539	0.00922867	0.380341
ENST00000354958	-0.684433	2.49494	-2.68562	0.00922887	0.380341
ENST00000546688	1.17924	-0.204475	2.68598	0.00923005	0.380341
ENST00000591132	-1.17466	0.862316	-2.68532	0.0092304	0.380341
ENST00000316981	0.84894	2.64943	2.6853	0.00923091	0.380341
ENST00000469884	-0.865646	3.55052	-2.68508	0.00923648	0.380341
ENST00000628350	1.25819	0.708355	2.68555	0.00923797	0.380341
ENST00000566954	1.39492	-1.60298	2.68767	0.00924075	0.380341
ENST00000462146	1.0337	2.33276	2.68443	0.00925319	0.380341
ENST00000257414	1.17931	1.38942	2.68436	0.00925417	0.380341
ENST00000649726	-1.07462	2.31462	-2.68448	0.00925465	0.380341
ENST00000591966	0.970935	0.792351	2.68361	0.00927401	0.380374
ENST00000253462	1.15253	0.636462	2.68991	0.00927684	0.380374
ENST00000425881	-1.16899	0.844548	-2.68322	0.00928258	0.380374
ENST00000644180	1.27457	0.598348	2.68389	0.00928705	0.380374
ENST00000506441	-1.1593	1.11687	-2.68293	0.00928983	0.380374
ENST00000479076	-0.922304	1.78237	-2.68252	0.00930006	0.380374
ENST00000382873	-1.20083	0.549904	-2.68196	0.00931401	0.380374
ENST00000394854	-1.43337	-0.240725	-2.68192	0.0093151	0.380374
ENST00000491458	1.31386	0.412356	2.68143	0.00932725	0.380374
ENST00000505526	-0.497495	4.37135	-2.68143	0.00932734	0.380374
ENST00000480308	1.82468	0.00603273	2.69196	0.00932882	0.380374
ENST00000636625	-0.521147	4.06261	-2.68164	0.00933131	0.380374
ENST00000589709	-1.3053	0.219773	-2.68102	0.0093374	0.380374
ENST00000530233	1.34373	-0.871067	2.68072	0.0093451	0.380374
ENST00000432178	1.13587	-1.26687	2.68109	0.0093465	0.380374
ENST00000650940	1.2999	-1.7782	2.68035	0.00935417	0.380374
ENST00000535372	1.18029	0.356889	2.68016	0.00935897	0.380374
ENST00000341744	0.904116	1.22291	2.68045	0.00936	0.380374
ENST00000496761	1.07676	-2.25204	2.68012	0.00936003	0.380374
ENST00000498273	0.743726	3.3352	2.68005	0.00936176	0.380374
ENST00000440184	-0.617127	4.92799	-2.68004	0.00936211	0.380374
ENST00000576952	-1.24854	1.38854	-2.67989	0.00936576	0.380374
ENST00000536092	1.35676	-1.44319	2.67978	0.00936862	0.380374
ENST00000443112	1.21162	0.353345	2.67935	0.00937938	0.380513
ENST00000578669	1.24503	-0.683471	2.67922	0.0093827	0.380513
ENST00000592791	-1.29882	-0.386546	-2.67894	0.00938967	0.380513
ENST00000313221	-1.16891	0.647604	-2.67878	0.00939356	0.380513
ENST00000409725	1.13876	-1.29759	2.67866	0.00939667	0.380513
ENST00000495827	0.873315	2.54063	2.67833	0.00940504	0.380653
ENST00000204549	-0.415965	8.42177	-2.68039	0.00941341	0.380792
ENST00000638958	0.672549	2.52172	2.67736	0.0094329	0.380875
ENST00000481797	-0.38878	6.53982	-2.67732	0.00943507	0.380875
ENST00000631375	-0.95357	1.11798	-2.67699	0.00943867	0.380875
ENST00000559750	1.24219	-0.766824	2.67748	0.00944554	0.380875
ENST00000572888	1.14055	-1.6309	2.67665	0.00944727	0.380875
ENST00000448726	-0.936767	1.77862	-2.6766	0.00944858	0.380875
ENST00000495851	-1.09409	1.06083	-2.67656	0.00944993	0.380875
ENST00000366654	1.0226	1.40664	2.67621	0.0094657	0.381116
ENST00000523207	-0.874342	6.03208	-2.67587	0.00946705	0.381116
ENST00000468439	1.07308	-1.98734	2.67588	0.00947071	0.381116
ENST00000394688	0.455493	4.16651	2.67507	0.00948753	0.381594
ENST00000604533	1.43503	-0.0262547	2.67454	0.00950082	0.381661
ENST00000642916	-1.14243	2.18764	-2.67423	0.00950898	0.381661
ENST00000564149	-1.68522	-0.123293	-2.67411	0.00951536	0.381661
ENST00000393567	-0.676517	4.6784	-2.67417	0.00952052	0.381661
ENST00000443917	-0.913229	2.10494	-2.6742	0.00952457	0.381661
ENST00000497063	-0.629823	4.77878	-2.67343	0.00952924	0.381661
ENST00000590472	0.594811	3.0975	2.67308	0.00953805	0.381661
ENST00000460009	1.10418	-0.234148	2.67301	0.00953989	0.381661
ENST00000531688	1.49064	-0.660835	2.67293	0.0095419	0.381661
ENST00000277216	-1.25161	1.15844	-2.6731	0.00954309	0.381661
ENST00000419003	1.15561	-0.0940456	2.67263	0.00954947	0.381661
ENST00000586176	1.12888	0.50843	2.67253	0.00955203	0.381661
ENST00000600213	1.2529	3.02177	2.67248	0.00955336	0.381661
ENST00000629214	-1.04803	2.15539	-2.67213	0.00956242	0.38175
ENST00000282388	1.23945	3.53213	2.67713	0.00956548	0.38175
ENST00000513329	-1.00604	1.41563	-2.67163	0.00957514	0.381939
ENST00000489886	-1.20254	-0.351237	-2.67125	0.00958475	0.38212
ENST00000231061	1.19073	1.82972	2.67116	0.00958958	0.38212
ENST00000615331	-0.811054	3.45636	-2.67016	0.00961289	0.38264
ENST00000366955	0.760028	2.74942	2.67015	0.00961305	0.38264
ENST00000623091	0.47655	3.91609	2.66996	0.00961802	0.38264
ENST00000603546	-0.811868	3.34589	-2.66972	0.00962397	0.38264
ENST00000457511	-1.11532	3.06474	-2.66959	0.00962739	0.38264
ENST00000217456	-1.19541	0.364014	-2.66908	0.00964065	0.382781
ENST00000505297	1.50313	-0.927636	2.67044	0.00964084	0.382781
ENST00000560975	0.711519	2.9735	2.6684	0.00965815	0.382795
ENST00000422202	1.21254	1.04788	2.66833	0.00965981	0.382795
ENST00000459781	1.47727	-0.853767	2.66833	0.00966003	0.382795
ENST00000438371	1.35263	-1.51763	2.66865	0.00966098	0.382795
ENST00000336156	-0.34697	7.14519	-2.66831	0.00967663	0.383122
ENST00000460300	1.16947	-1.9502	2.6679	0.00967915	0.383122
ENST00000332858	-0.538531	5.21271	-2.66753	0.00970182	0.383781
ENST00000530388	-0.350675	6.51971	-2.66666	0.00970572	0.383781
ENST00000201979	1.3985	-1.01223	2.66624	0.00971402	0.383874
ENST00000511362	1.18181	0.656364	2.66608	0.00971801	0.383874
ENST00000427589	-1.33702	0.87756	-2.66581	0.00972524	0.38389
ENST00000589506	-1.23533	0.293984	-2.66519	0.00974134	0.38389
ENST00000586787	-1.20074	-1.49248	-2.66473	0.00975373	0.38389
ENST00000504820	1.24762	0.115466	2.66458	0.00975701	0.38389
ENST00000592581	-1.25765	0.387039	-2.66453	0.00977007	0.38389
ENST00000426445	-0.638716	4.77828	-2.66379	0.00977823	0.38389
ENST00000554861	1.1524	-1.78969	2.6637	0.00977994	0.38389
ENST00000518792	0.971908	2.58664	2.66363	0.00978191	0.38389
ENST00000550079	1.12722	-1.53047	2.66397	0.00978223	0.38389
ENST00000532709	-0.616435	3.74043	-2.66389	0.00978322	0.38389
ENST00000636197	-0.974031	3.4787	-2.66337	0.00978878	0.38389
ENST00000438378	-0.555828	6.33185	-2.66326	0.00979146	0.38389
ENST00000516664	0.73354	1.90375	2.66326	0.00979163	0.38389
ENST00000455170	1.29034	-0.79894	2.6632	0.00979301	0.38389
ENST00000264703	-0.991979	1.69559	-2.66312	0.00979518	0.38389
ENST00000334859	1.16478	0.526131	2.66302	0.00979788	0.38389
ENST00000328224	-0.526372	6.4337	-2.66281	0.00980341	0.383912
ENST00000373518	-1.19511	-1.50208	-2.66239	0.00981524	0.384147
ENST00000641626	-0.870422	4.66854	-2.66219	0.00982389	0.384147
ENST00000330368	-0.870395	2.6913	-2.66228	0.00982431	0.384147
ENST00000586220	1.15838	-0.22283	2.66169	0.00983271	0.384281
ENST00000488127	1.45323	1.83185	2.674	0.00984972	0.384531
ENST00000233027	0.504891	3.95929	2.66071	0.00985849	0.384531
ENST00000344851	1.11033	-0.360603	2.66035	0.00986775	0.384531
ENST00000634389	-1.16184	-0.0259029	-2.66113	0.00987287	0.384531
ENST00000471323	-0.504744	4.81769	-2.6601	0.00987433	0.384531
ENST00000648704	1.21673	-1.9736	2.6601	0.00987437	0.384531
ENST00000573699	-1.27774	-0.638074	-2.65994	0.00987858	0.384531
ENST00000590966	1.27775	1.34028	2.65958	0.00988807	0.384531
ENST00000460674	1.44471	-1.08537	2.65949	0.00989042	0.384531
ENST00000470723	0.675362	2.34424	2.6603	0.00989498	0.384531
ENST00000535609	1.47442	-1.01784	2.65932	0.00989513	0.384531
ENST00000639185	0.476579	6.20283	2.66001	0.00990335	0.384531
ENST00000521941	1.22447	-1.34981	2.65899	0.00990377	0.384531
ENST00000622957	1.20251	-0.506795	2.65874	0.00991022	0.384549
ENST00000466194	0.967605	1.91759	2.65858	0.00991449	0.384549
ENST00000553338	-1.00873	1.48469	-2.6584	0.00991917	0.384549
ENST00000469483	1.27605	-1.53316	2.658	0.00992989	0.384577
ENST00000586259	1.28944	-1.18744	2.65904	0.00993144	0.384577
ENST00000522466	1.1941	-1.70129	2.65784	0.00993481	0.384577
ENST00000547222	-1.25927	-0.05106	-2.65658	0.00996736	0.385644
[truncated: 75,306 more rows]

## Sheet: B
Transcript analysis of Non-neurons in SCZ vs Controls using limma
	logFC	AveExpr	t	P.Value	adj.P.Val
ENST00000356810	-1.8149	-0.366921	-4.84898	6.90499e-06	0.381763
ENST00000532392	-1.91888	2.4319	-4.492	2.64221e-05	0.381763
ENST00000521942	-1.88382	-0.604089	-4.39884	3.67188e-05	0.381763
ENST00000562836	-1.54805	2.0247	-4.39659	3.70191e-05	0.381763
ENST00000616504	1.67175	-2.01881	4.37584	4.01987e-05	0.381763
ENST00000482204	1.64644	0.632934	4.36935	4.08625e-05	0.381763
ENST00000591439	-1.75021	0.278461	-4.34468	4.48661e-05	0.381763
ENST00000551017	1.32357	3.63307	4.33778	4.59568e-05	0.381763
ENST00000265748	1.7488	2.39722	4.32725	4.76858e-05	0.381763
ENST00000458420	-0.922348	4.99877	-4.26968	5.84974e-05	0.381763
ENST00000338728	-1.12629	3.02559	-4.23952	6.51659e-05	0.381763
ENST00000455841	1.80527	-0.897215	4.21219	7.18022e-05	0.381763
ENST00000406733	-1.37992	2.13319	-4.21133	7.24247e-05	0.381763
ENST00000357325	1.77189	0.0638882	4.209	7.27503e-05	0.381763
ENST00000399232	-0.8809	6.05109	-4.14233	9.22131e-05	0.382438
ENST00000591120	1.75203	-1.01339	4.13975	9.45379e-05	0.382438
ENST00000596133	-1.41771	1.25312	-4.13434	9.45595e-05	0.382438
ENST00000365128	-1.1092	8.59867	-4.11426	0.000101617	0.382438
ENST00000383907	-1.1405	8.15317	-4.11314	0.000102584	0.382438
ENST00000378475	-1.66366	0.972345	-4.10693	0.000104113	0.382438
ENST00000651563	1.82072	-0.364976	4.08182	0.000121891	0.426421
ENST00000476764	1.10321	1.37844	4.02448	0.000138802	0.44134
ENST00000457540	1.77735	3.90631	4.01805	0.000142015	0.44134
ENST00000474177	-1.31284	0.567721	-4.01351	0.000144178	0.44134
ENST00000457408	1.46372	-1.8454	3.98448	0.000159403	0.468428
ENST00000527934	-1.25449	1.99772	-3.9725	0.000166122	0.469396
ENST00000587850	-1.43122	2.2571	-3.91752	0.000200604	0.498912
ENST00000629498	-1.60139	-0.477536	-3.91723	0.000200804	0.498912
ENST00000518781	0.721454	4.76934	3.90382	0.000210216	0.498912
ENST00000402604	-0.680492	3.87417	-3.90336	0.00021054	0.498912
ENST00000528605	-0.765618	4.89607	-3.89501	0.000216622	0.498912
ENST00000375864	1.58	-1.00247	3.88139	0.000233906	0.498912
ENST00000624720	1.15021	2.13455	3.87267	0.000234619	0.498912
ENST00000389916	1.23594	5.34487	3.86792	0.000237792	0.498912
ENST00000512907	-0.75005	5.82748	-3.86006	0.000243943	0.498912
ENST00000467726	1.49901	-1.20634	3.85314	0.000249732	0.498912
ENST00000216121	-0.58807	4.40319	-3.85329	0.000251269	0.498912
ENST00000538339	1.41352	0.542387	3.82803	0.000271856	0.517565
ENST00000526727	-1.03804	2.95993	-3.82489	0.000274753	0.517565
ENST00000461025	-1.51083	-1.06958	-3.80183	0.000296936	0.522557
ENST00000384614	-1.23441	4.88616	-3.77818	0.000321999	0.522557
ENST00000534801	-1.46249	-0.184095	-3.77637	0.00032341	0.522557
ENST00000438666	1.59747	-0.630828	3.7819	0.000324955	0.522557
ENST00000386157	-0.92304	10.4562	-3.77486	0.00032724	0.522557
ENST00000577410	-1.17919	1.86593	-3.74661	0.000357219	0.522557
ENST00000262839	-1.20176	4.41072	-3.74475	0.00035945	0.522557
ENST00000527810	1.5803	-0.830197	3.72626	0.000382262	0.522557
ENST00000650135	-0.924195	3.39083	-3.72317	0.000386204	0.522557
ENST00000458862	-0.915345	8.60692	-3.72327	0.000386337	0.522557
ENST00000312719	-0.659708	5.89587	-3.71295	0.000399527	0.522557
ENST00000370630	0.922152	3.30664	3.71265	0.000400389	0.522557
ENST00000643936	-0.898093	2.75414	-3.71106	0.000402165	0.522557
ENST00000543561	0.612295	6.40835	3.70745	0.000406936	0.522557
ENST00000563440	-0.597887	5.32371	-3.70611	0.000409279	0.522557
ENST00000542367	-1.53661	-0.157238	-3.70032	0.000416598	0.522557
ENST00000504416	-0.556254	5.80354	-3.69121	0.000429348	0.522557
ENST00000460562	-0.591069	4.43605	-3.69078	0.000429953	0.522557
ENST00000260408	-0.371379	7.08365	-3.68993	0.000431171	0.522557
ENST00000262848	0.867372	6.30189	3.68814	0.00043516	0.522557
ENST00000513905	1.35554	-1.32041	3.68387	0.000441664	0.522557
ENST00000239223	-1.11876	7.48551	-3.68393	0.000442163	0.522557
ENST00000547203	-0.827387	4.38087	-3.67507	0.000452913	0.522557
ENST00000463770	1.48911	-0.739651	3.676	0.000464239	0.522557
ENST00000409517	-0.888662	2.69784	-3.64837	0.000494413	0.522557
ENST00000511050	-0.566958	5.85645	-3.64251	0.000504027	0.522557
ENST00000265036	1.39354	-1.0741	3.64047	0.000507409	0.522557
ENST00000229903	1.92432	0.934283	3.63879	0.000511361	0.522557
ENST00000508253	-1.559	-0.524771	-3.63024	0.00052469	0.522557
ENST00000449965	1.61482	-1.1744	3.62913	0.000526601	0.522557
ENST00000364359	-1.11192	5.65503	-3.62428	0.000535037	0.522557
ENST00000566667	1.52999	-1.56323	3.61897	0.000544405	0.522557
ENST00000425198	-0.43156	9.12207	-3.61808	0.000545991	0.522557
ENST00000596215	-1.33018	0.714755	-3.61502	0.000551473	0.522557
ENST00000437068	1.37759	-1.2622	3.61393	0.000553661	0.522557
ENST00000418358	-1.71248	-0.186194	-3.6096	0.000561571	0.522557
ENST00000528836	-1.31212	0.509083	-3.60903	0.000562358	0.522557
ENST00000255082	-1.71185	-0.295897	-3.60716	0.000565796	0.522557
ENST00000543501	1.53235	-1.38697	3.60569	0.000568526	0.522557
ENST00000568782	-1.4165	-0.438388	-3.60554	0.000568804	0.522557
ENST00000532465	-1.26874	1.44381	-3.60541	0.000569033	0.522557
ENST00000464419	1.45987	0.222867	3.59077	0.000597247	0.541696
ENST00000228434	-1.81878	1.29437	-3.586	0.000608649	0.545234
ENST00000357360	-1.18346	2.05301	-3.58105	0.000615991	0.545234
ENST00000473006	1.42023	-0.44306	3.57023	0.000637995	0.550115
ENST00000440498	-0.519189	6.14585	-3.56794	0.000642743	0.550115
ENST00000411734	1.41817	2.49115	3.56438	0.000650218	0.550115
ENST00000584646	1.60738	-0.661488	3.56379	0.000651458	0.550115
ENST00000531098	-1.14307	0.545323	-3.55858	0.000662649	0.553207
ENST00000394071	0.922574	1.82712	3.54103	0.000701194	0.578808
ENST00000568770	-1.39585	-0.977954	-3.53237	0.000728297	0.592417
ENST00000542817	0.989303	4.67378	3.52692	0.000733808	0.592417
ENST00000485632	-1.14767	2.50592	-3.51342	0.000766345	0.610018
ENST00000647554	-0.874538	2.80112	-3.50683	0.000783704	0.610018
ENST00000554980	0.845205	2.66783	3.49856	0.000803767	0.610018
ENST00000623576	-1.47006	0.00595337	-3.4937	0.000816363	0.610018
ENST00000385046	-0.636271	4.86858	-3.49239	0.0008198	0.610018
ENST00000469781	1.26641	2.2305	3.4915	0.000823297	0.610018
ENST00000362302	-1.42043	-0.455033	-3.4853	0.000838597	0.610018
ENST00000568575	1.32198	-0.647117	3.48463	0.000840403	0.610018
ENST00000474034	-1.47306	-1.19504	-3.48376	0.00084281	0.610018
ENST00000558004	-1.22031	0.858473	-3.48304	0.000844696	0.610018
ENST00000482416	1.52268	-1.024	3.48105	0.000850066	0.610018
ENST00000427953	1.43674	-0.592752	3.47889	0.000855945	0.610018
ENST00000549056	-0.672245	3.59446	-3.475	0.000869166	0.610018
ENST00000498352	-1.86607	3.0445	-3.46983	0.000886136	0.610018
ENST00000255039	0.613127	7.23929	3.46624	0.000892001	0.610018
ENST00000651552	-1.4194	2.91622	-3.46462	0.000895819	0.610018
ENST00000568686	-0.454511	7.66643	-3.46513	0.000896768	0.610018
ENST00000637103	1.29497	-0.538141	3.4505	0.000936966	0.615607
ENST00000438113	-1.38681	-0.147827	-3.44561	0.000951637	0.615607
ENST00000370320	1.4713	-1.2299	3.44537	0.000953847	0.615607
ENST00000496040	-1.85417	-0.277026	-3.43974	0.000971486	0.615607
ENST00000491645	-1.46733	-0.957517	-3.44231	0.000981657	0.615607
ENST00000242465	-1.58083	1.4214	-3.42386	0.00102452	0.615607
ENST00000507199	1.21811	1.83922	3.42176	0.00102633	0.615607
ENST00000589921	-1.11581	2.86854	-3.41973	0.00103293	0.615607
ENST00000477642	-1.2826	0.245589	-3.41819	0.00103797	0.615607
ENST00000636298	-1.2822	0.22834	-3.4173	0.00104087	0.615607
ENST00000577252	-1.22475	2.01111	-3.41684	0.00104241	0.615607
ENST00000372989	1.30223	0.733123	3.40641	0.00107726	0.615607
ENST00000557525	-1.35601	-0.82775	-3.40592	0.00107895	0.615607
ENST00000368899	-1.19598	1.35924	-3.40563	0.00107994	0.615607
ENST00000517660	1.38369	-1.26443	3.40236	0.0010911	0.615607
ENST00000434939	1.05697	0.95187	3.40045	0.00109769	0.615607
ENST00000406041	-0.845693	3.90677	-3.40034	0.0011012	0.615607
ENST00000363373	1.49949	1.3512	3.39894	0.00111091	0.615607
ENST00000498645	-1.26386	-0.332203	-3.39391	0.00112052	0.615607
ENST00000497800	-1.13988	1.71686	-3.39297	0.00112414	0.615607
ENST00000470389	-1.39461	0.868821	-3.38277	0.00116045	0.615607
ENST00000364642	-0.929343	3.09764	-3.38285	0.001161	0.615607
ENST00000439622	-0.834299	3.7914	-3.38207	0.00116308	0.615607
ENST00000548926	-1.44232	0.0681099	-3.38138	0.00116574	0.615607
ENST00000394945	1.41531	3.04829	3.37611	0.00118498	0.615607
ENST00000549637	1.34974	3.68761	3.37549	0.00118791	0.615607
ENST00000394511	-0.748329	3.82635	-3.37419	0.00119211	0.615607
ENST00000482848	-1.23834	1.35765	-3.37347	0.00119553	0.615607
ENST00000641058	-0.790003	2.24735	-3.37279	0.00120326	0.615607
ENST00000565074	1.52352	0.166958	3.37024	0.00120698	0.615607
ENST00000555111	-0.860948	2.56265	-3.36707	0.00121902	0.615607
ENST00000513546	0.65169	3.72243	3.36618	0.00122242	0.615607
ENST00000557779	1.4547	-0.114778	3.36458	0.00122854	0.615607
ENST00000467622	-0.81713	2.75951	-3.36382	0.00123153	0.615607
ENST00000561827	1.44575	-1.00051	3.36345	0.00123292	0.615607
ENST00000616019	1.49296	-0.958981	3.3619	0.00123889	0.615607
ENST00000474368	-1.2726	1.30054	-3.36083	0.00124332	0.615607
ENST00000472625	1.14242	0.460476	3.35726	0.001257	0.615607
ENST00000582401	0.576461	7.03959	3.35602	0.00126188	0.615607
ENST00000648969	-1.89506	2.53633	-3.34923	0.00128892	0.615607
ENST00000550660	-1.25814	-0.528258	-3.33728	0.00133886	0.615607
ENST00000433839	-1.58735	1.36094	-3.33312	0.00135527	0.615607
ENST00000476316	-0.901467	1.96334	-3.33285	0.00135642	0.615607
ENST00000504812	1.01361	3.34977	3.33253	0.00135779	0.615607
ENST00000607701	-0.612226	4.91608	-3.33197	0.00136024	0.615607
ENST00000483147	-1.3743	-0.487079	-3.33011	0.00136805	0.615607
ENST00000446751	-0.650738	6.1588	-3.3282	0.00137616	0.615607
ENST00000607692	-0.523539	5.5321	-3.32721	0.00138042	0.615607
ENST00000488474	1.59244	-0.259212	3.32709	0.00138092	0.615607
ENST00000328403	-0.862627	2.25861	-3.32578	0.0013892	0.615607
ENST00000262430	0.386992	8.89269	3.32309	0.00139838	0.615607
ENST00000392396	-1.1705	1.68758	-3.32225	0.00140646	0.615607
ENST00000417811	-0.51684	5.46177	-3.31955	0.00141367	0.615607
ENST00000449209	-1.36526	-1.15287	-3.31991	0.0014169	0.615607
ENST00000627198	-1.20726	1.10239	-3.31764	0.00142416	0.615607
ENST00000491602	1.36388	-0.043626	3.31485	0.00143445	0.615607
ENST00000365504	-1.16745	1.62725	-3.31458	0.00143562	0.615607
ENST00000475602	-0.949213	2.57718	-3.31099	0.00145169	0.615607
ENST00000516404	-1.2766	5.52099	-3.31045	0.00145415	0.615607
ENST00000593620	-1.23282	-1.43875	-3.30458	0.00148083	0.615607
ENST00000588595	1.38093	-1.82116	3.31543	0.0014816	0.615607
ENST00000592702	1.21675	-0.372482	3.30284	0.00148883	0.615607
ENST00000486882	-1.44691	2.94319	-3.30226	0.0014915	0.615607
ENST00000500527	-1.11125	1.05527	-3.30283	0.00149237	0.615607
ENST00000529285	1.26578	-1.13162	3.29487	0.00152595	0.615607
ENST00000227507	-0.83267	5.71035	-3.29329	0.0015334	0.615607
ENST00000429791	1.44156	2.12031	3.29404	0.0015338	0.615607
ENST00000454681	-0.673429	3.73202	-3.29214	0.00153888	0.615607
ENST00000440419	-0.597683	3.96301	-3.29196	0.00153974	0.615607
ENST00000390735	1.44819	-0.539602	3.2892	0.00155291	0.615607
ENST00000618958	1.01329	2.47252	3.29155	0.00155528	0.615607
ENST00000432797	1.27282	3.55882	3.28799	0.00155954	0.615607
ENST00000488370	0.952558	3.59344	3.2862	0.00156734	0.615607
ENST00000559199	-0.757411	3.07521	-3.28605	0.0015682	0.615607
ENST00000521610	-1.19344	-0.351416	-3.28589	0.00156901	0.615607
ENST00000421124	1.35651	0.105728	3.28339	0.00158207	0.615607
ENST00000647729	1.57083	-0.587809	3.27996	0.00159781	0.615607
ENST00000610576	1.00609	1.49741	3.27786	0.00160816	0.615607
ENST00000602981	-1.39274	0.528111	-3.27778	0.00160856	0.615607
ENST00000471913	-1.12135	2.29855	-3.27768	0.00160911	0.615607
ENST00000260379	1.31106	0.50344	3.27719	0.00161149	0.615607
ENST00000621930	1.43693	-0.367757	3.27554	0.00161969	0.615607
ENST00000526643	1.41054	-1.1616	3.27549	0.00161997	0.615607
ENST00000650918	-1.34834	5.63168	-3.27566	0.00162025	0.615607
ENST00000558990	-1.11622	-1.31726	-3.27369	0.00162896	0.615607
ENST00000510274	-1.42305	0.844911	-3.2727	0.00163393	0.615607
ENST00000463388	-1.2393	1.07625	-3.27269	0.001634	0.615607
ENST00000371437	-0.703019	3.90886	-3.26907	0.00165264	0.619453
ENST00000623083	-0.602832	4.8493	-3.26723	0.00166165	0.61967
ENST00000491475	-0.749415	3.82581	-3.26419	0.00167725	0.622328
ENST00000291759	-1.3849	1.56682	-3.25957	0.00170124	0.623839
ENST00000645312	-1.15945	1.36852	-3.25566	0.00172174	0.623839
ENST00000384504	-0.925026	4.83707	-3.25068	0.00174824	0.623839
ENST00000514057	1.10222	6.60212	3.2469	0.00177331	0.623839
ENST00000644170	-1.0482	1.31925	-3.24593	0.00177388	0.623839
ENST00000623527	-1.38771	0.78335	-3.24558	0.00177732	0.623839
ENST00000376414	-1.56481	1.57548	-3.24488	0.00178694	0.623839
ENST00000284273	-0.985037	2.88926	-3.2427	0.00179249	0.623839
ENST00000361567	0.930018	10.3436	3.24209	0.00179483	0.623839
ENST00000451651	1.37634	-1.72374	3.24174	0.00179945	0.623839
ENST00000497489	-0.968039	2.09279	-3.23839	0.00181528	0.623839
ENST00000421246	-1.2365	-0.901377	-3.23785	0.0018183	0.623839
ENST00000606566	-1.36864	0.106197	-3.23577	0.00182987	0.623839
ENST00000493781	-1.1493	0.933141	-3.23554	0.00183609	0.623839
ENST00000639318	1.42996	-1.56482	3.23414	0.00183897	0.623839
ENST00000534576	-1.38375	-0.865846	-3.23546	0.00186396	0.623839
ENST00000641966	-1.28033	0.740884	-3.22968	0.0018642	0.623839
ENST00000370103	-1.47638	0.211804	-3.22777	0.00187522	0.623839
ENST00000392452	-0.576806	3.97685	-3.22372	0.00190314	0.623839
ENST00000552169	1.89848	-0.36974	3.22184	0.00190938	0.623839
ENST00000274487	-0.737861	3.90752	-3.22215	0.00191021	0.623839
ENST00000318184	-1.47502	0.460094	-3.22096	0.00191446	0.623839
ENST00000513822	1.24344	-0.457425	3.22074	0.0019158	0.623839
ENST00000242249	-1.03851	2.36558	-3.21978	0.00192137	0.623839
ENST00000518094	1.12883	1.47851	3.21945	0.0019233	0.623839
ENST00000380067	-1.32902	-0.27487	-3.21767	0.00193374	0.623839
ENST00000512558	-0.585286	5.01585	-3.217	0.00193768	0.623839
ENST00000517732	-1.25942	2.2229	-3.21694	0.00193958	0.623839
ENST00000445091	2.27128	0.0571149	3.2164	0.00194122	0.623839
ENST00000384111	-0.740887	7.62558	-3.2155	0.00194659	0.623839
ENST00000652526	-1.30595	1.23751	-3.21328	0.00195974	0.623839
ENST00000496054	-1.33295	0.576728	-3.21306	0.00196497	0.623839
ENST00000364578	-0.990349	5.37884	-3.21227	0.00196844	0.623839
ENST00000627173	-1.25484	1.9377	-3.21015	0.00197852	0.623839
ENST00000473752	-1.21437	-1.18442	-3.21038	0.00197872	0.623839
ENST00000567927	1.19934	1.95689	3.20844	0.00198883	0.623839
ENST00000477927	-0.986949	3.13483	-3.2053	0.0020079	0.623839
ENST00000265634	1.59538	4.4508	3.20326	0.00202403	0.623839
ENST00000651890	-1.40025	0.500403	-3.20266	0.00202411	0.623839
ENST00000606865	-1.13015	1.46774	-3.20149	0.00203127	0.623839
ENST00000476784	-0.58759	3.08597	-3.20132	0.00203233	0.623839
ENST00000368467	-0.459201	5.40886	-3.19931	0.00204906	0.623839
ENST00000385573	-1.02786	3.70972	-3.19633	0.00206447	0.623839
ENST00000568538	-1.29347	0.539928	-3.19531	0.00206971	0.623839
ENST00000483853	-1.18098	0.712698	-3.19516	0.00207126	0.623839
ENST00000492185	1.63837	-1.27067	3.19532	0.00207193	0.623839
ENST00000480422	1.30985	-1.53282	3.19317	0.00208392	0.624887
ENST00000624792	1.30086	-1.35416	3.18908	0.00210915	0.627172
ENST00000525173	-1.29923	0.559893	-3.18819	0.00211483	0.627172
ENST00000529802	1.34477	-0.856045	3.18783	0.00211715	0.627172
ENST00000416605	-0.84633	2.13866	-3.18517	0.00213426	0.629255
ENST00000472270	-1.12395	1.29245	-3.18408	0.00214131	0.629255
ENST00000440865	1.08977	1.60371	3.18099	0.00216278	0.633031
ENST00000264954	0.803081	1.82322	3.17942	0.00217171	0.633123
ENST00000615884	1.52378	0.185965	3.17673	0.00218948	0.635779
ENST00000264235	-0.39816	6.67489	-3.17495	0.00220135	0.636709
ENST00000310389	-0.328841	7.82337	-3.17061	0.00223182	0.638569
ENST00000392993	-0.577974	6.83701	-3.17002	0.00223822	0.638569
ENST00000614205	1.12151	1.00427	3.16454	0.00227149	0.638569
ENST00000486153	1.23726	-0.772977	3.16357	0.00227814	0.638569
ENST00000296499	-1.19176	1.646	-3.16222	0.0022874	0.638569
ENST00000561325	-1.18263	0.050713	-3.16151	0.00229231	0.638569
ENST00000577382	-1.53827	0.907817	-3.16156	0.00229285	0.638569
ENST00000219689	-0.334673	8.74363	-3.16123	0.00229594	0.638569
ENST00000515217	-1.26034	1.27701	-3.16057	0.0022992	0.638569
ENST00000467292	1.44226	0.345999	3.1602	0.00230716	0.638569
ENST00000504805	1.21549	0.142214	3.15829	0.0023147	0.638569
ENST00000426104	1.29313	-1.09833	3.15808	0.0023161	0.638569
ENST00000599949	1.40228	-1.40137	3.15556	0.00233697	0.638569
ENST00000511829	-0.920018	3.33905	-3.15363	0.00234734	0.638569
ENST00000470978	-1.06767	1.2818	-3.15325	0.00235006	0.638569
ENST00000319420	0.828721	3.23552	3.1532	0.00235038	0.638569
ENST00000494628	0.978926	1.97156	3.15184	0.00236015	0.638569
ENST00000522258	-1.18452	-0.651828	-3.1507	0.00236905	0.638569
ENST00000477629	-0.768259	3.02029	-3.14704	0.00239428	0.638569
ENST00000521238	-0.884408	3.40582	-3.14488	0.00240988	0.638569
ENST00000265085	-0.315288	8.14074	-3.14472	0.0024156	0.638569
ENST00000391100	-0.765455	7.72036	-3.1427	0.00242669	0.638569
ENST00000415793	-0.904217	1.7744	-3.14093	0.00243866	0.638569
ENST00000545506	1.20689	-0.742713	3.14001	0.00244537	0.638569
ENST00000222573	0.539097	6.78736	3.13854	0.00245618	0.638569
ENST00000489817	-0.763091	3.34899	-3.13854	0.00245619	0.638569
ENST00000334895	1.50517	-1.03259	3.13632	0.00247262	0.638569
ENST00000467842	-0.371137	11.0364	-3.13422	0.00248816	0.638569
ENST00000459004	-0.833292	2.6463	-3.13415	0.00248871	0.638569
ENST00000393985	1.32093	-0.842613	3.13385	0.00249094	0.638569
ENST00000494482	-1.20248	0.649597	-3.13221	0.00250326	0.638569
ENST00000476892	-0.761328	3.07508	-3.13072	0.00251443	0.638569
ENST00000536845	-1.12375	0.784963	-3.13019	0.00251844	0.638569
ENST00000564513	1.51321	-1.49474	3.12952	0.00252344	0.638569
ENST00000466102	2.00985	0.854402	3.13107	0.00253328	0.638569
ENST00000385219	-0.703137	4.80981	-3.12538	0.00255779	0.638569
ENST00000428157	-1.39118	0.421037	-3.12588	0.00256029	0.638569
ENST00000610370	1.44637	-1.29077	3.12408	0.00256512	0.638569
ENST00000526423	-0.919681	1.69402	-3.12325	0.00257125	0.638569
ENST00000341744	-1.1085	0.186882	-3.12207	0.00258486	0.638569
ENST00000341772	-0.408423	8.30907	-3.12189	0.00258688	0.638569
ENST00000534891	1.18313	-0.744159	3.1281	0.00258827	0.638569
ENST00000446068	-0.938894	1.95973	-3.12087	0.00258958	0.638569
ENST00000635333	-1.77939	2.7105	-3.12026	0.0025943	0.638569
ENST00000260723	-1.09612	1.88732	-3.11856	0.00260752	0.638569
ENST00000471544	-1.12504	1.91875	-3.11855	0.00260761	0.638569
ENST00000496648	1.31035	-0.292066	3.11621	0.00262603	0.640295
ENST00000596637	1.34207	-0.962507	3.11549	0.00263209	0.640295
ENST00000493449	1.31029	-1.301	3.11164	0.00266194	0.642431
ENST00000339697	-0.465406	8.07281	-3.11266	0.00266239	0.642431
ENST00000514481	1.23707	-1.75603	3.11192	0.00266738	0.642431
ENST00000480433	-0.695495	3.43957	-3.11106	0.00267782	0.642431
ENST00000414273	1.78038	4.18307	3.1088	0.00268459	0.642431
ENST00000258111	0.589338	7.13835	3.10693	0.00270433	0.645053
ENST00000585990	1.35309	0.195322	3.10495	0.00271561	0.645299
ENST00000469510	-0.722189	2.74437	-3.10405	0.00272848	0.645299
ENST00000474966	1.13834	-1.75282	3.10188	0.00274196	0.645299
ENST00000604965	-0.913577	2.17916	-3.10057	0.00275374	0.645299
ENST00000452621	-1.01352	1.11676	-3.09828	0.00277229	0.645299
ENST00000553145	1.25163	-0.251522	3.09751	0.00277637	0.645299
ENST00000507395	-0.921361	1.29755	-3.09592	0.00278951	0.645299
ENST00000382100	-0.421001	6.28883	-3.0935	0.00280971	0.645299
ENST00000534452	-0.676866	3.75853	-3.09035	0.00283609	0.645299
ENST00000587267	0.827733	2.80295	3.08934	0.00284465	0.645299
ENST00000495743	-1.13557	-0.11445	-3.08862	0.00285075	0.645299
ENST00000530736	1.2529	-0.680245	3.09589	0.00285185	0.645299
ENST00000602230	-1.24092	-0.0369361	-3.08827	0.00285365	0.645299
ENST00000329236	1.30171	-0.790391	3.08845	0.00285527	0.645299
ENST00000624046	0.974282	2.23032	3.08656	0.00286901	0.645299
ENST00000534733	-0.739617	3.03546	-3.08696	0.0028694	0.645299
ENST00000464073	-1.19863	1.36068	-3.08642	0.00287074	0.645299
ENST00000504643	1.06113	0.201575	3.08482	0.00288307	0.645299
ENST00000458790	-1.44031	6.74743	-3.08422	0.00288819	0.645299
ENST00000364089	-1.05365	4.64816	-3.08306	0.00289813	0.645299
ENST00000447623	-1.1374	2.43038	-3.08161	0.00291095	0.645299
ENST00000301149	-0.802625	4.90686	-3.08098	0.00291609	0.645299
ENST00000240691	-1.16003	-1.13566	-3.08394	0.00292165	0.645299
ENST00000545802	-1.22836	1.37323	-3.08027	0.00292226	0.645299
ENST00000530729	-1.08681	2.09914	-3.07919	0.00293332	0.645299
ENST00000392217	1.20767	-2.11187	3.08003	0.00293456	0.645299
ENST00000539927	1.18613	-0.0468228	3.07777	0.00294393	0.645299
ENST00000587933	-1.27439	0.543	-3.07523	0.00296676	0.645299
ENST00000341322	-0.531922	4.71333	-3.07411	0.00297604	0.645299
ENST00000317357	-0.357845	6.7689	-3.07137	0.00300683	0.645299
ENST00000539541	-0.86081	2.40344	-3.06981	0.00301415	0.645299
ENST00000544714	-1.25301	-0.230076	-3.06972	0.00301575	0.645299
ENST00000529616	1.37282	0.76355	3.06884	0.00302277	0.645299
ENST00000491706	-0.75393	2.42105	-3.06862	0.00302694	0.645299
ENST00000434561	-1.12728	0.698602	-3.06776	0.00303284	0.645299
ENST00000466712	-1.36353	-0.865636	-3.06769	0.00303312	0.645299
ENST00000496192	1.1766	-1.59138	3.06942	0.00303858	0.645299
ENST00000482031	1.11375	0.251379	3.06824	0.00304757	0.645299
ENST00000222693	1.03416	1.80667	3.06472	0.00306342	0.645299
ENST00000371520	1.27353	-1.95508	3.06401	0.00306626	0.645299
ENST00000325875	0.583297	2.88376	3.06384	0.00307096	0.645299
ENST00000523917	-0.839849	1.84977	-3.06187	0.0030857	0.645299
ENST00000505560	-0.423151	6.24678	-3.06124	0.00309148	0.645299
ENST00000480860	-1.14355	-0.0449738	-3.0622	0.00309429	0.645299
ENST00000398259	-1.54038	0.353508	-3.05818	0.00312348	0.645299
ENST00000442490	-1.42753	-0.0973566	-3.05673	0.00313283	0.645299
ENST00000567228	1.41654	-1.23829	3.05566	0.00314321	0.645299
ENST00000359576	-0.75758	3.07992	-3.05553	0.00314448	0.645299
ENST00000488128	-0.692743	6.70934	-3.05509	0.00314807	0.645299
ENST00000375799	1.28767	0.538145	3.05475	0.00315173	0.645299
ENST00000199320	1.13396	0.463738	3.05151	0.00318393	0.645299
ENST00000556319	-1.28823	-0.299916	-3.05111	0.00318524	0.645299
ENST00000370574	1.42569	2.74539	3.05097	0.00318774	0.645299
ENST00000542567	-1.42984	-0.0984716	-3.05056	0.00319035	0.645299
ENST00000457598	-0.699341	3.52593	-3.0502	0.00319374	0.645299
ENST00000648057	1.54335	-1.33797	3.05135	0.00321193	0.645299
ENST00000496015	0.746287	3.04271	3.0481	0.00321357	0.645299
ENST00000481066	-0.658238	3.56556	-3.04751	0.0032192	0.645299
ENST00000440496	0.80714	2.35521	3.0473	0.0032236	0.645299
ENST00000615016	-1.32234	1.76617	-3.04531	0.00324403	0.647624
ENST00000294168	-0.582787	4.00664	-3.04247	0.0032673	0.650503
ENST00000512398	-0.858107	2.32337	-3.03973	0.00329725	0.653687
ENST00000274217	-1.02761	5.47291	-3.03925	0.00330255	0.653687
ENST00000561993	-0.832686	2.66566	-3.03805	0.00330999	0.653687
ENST00000431685	-1.30385	1.1914	-3.03595	0.00333812	0.656447
ENST00000485980	1.09286	3.53201	3.03479	0.00334183	0.656447
ENST00000613421	1.25516	-0.0751745	3.03327	0.0033568	0.657443
ENST00000587280	1.21662	-2.04239	3.03225	0.00336683	0.657443
ENST00000507353	-1.03202	0.978554	-3.032	0.00337758	0.657443
ENST00000513854	1.11215	0.154492	3.03019	0.00338724	0.657443
ENST00000533092	-1.13045	-1.32092	-3.02988	0.00339165	0.657443
ENST00000483783	1.0538	1.26693	3.02805	0.00340864	0.657512
ENST00000477101	-0.456748	5.21375	-3.02792	0.00340991	0.657512
ENST00000405720	-1.17008	1.97658	-3.02475	0.0034418	0.659663
ENST00000462201	-1.34053	-0.438116	-3.02334	0.00345783	0.659663
ENST00000504613	1.22771	-1.67742	3.02266	0.00346293	0.659663
ENST00000552133	-1.2828	-0.686821	-3.02253	0.00346422	0.659663
ENST00000242310	-0.908895	2.82433	-3.02275	0.00346596	0.659663
ENST00000426467	1.80138	0.315891	3.01919	0.0035014	0.660188
ENST00000255320	-1.03121	2.34176	-3.01955	0.00350174	0.660188
ENST00000563957	1.16213	0.219639	3.01841	0.00350628	0.660188
ENST00000518911	-0.981793	2.42942	-3.0198	0.00350639	0.660188
ENST00000608737	-1.13409	2.3334	-3.01746	0.00351601	0.660188
ENST00000477361	-0.39416	5.36949	-3.01605	0.00353054	0.660188
ENST00000309422	-1.11461	0.899528	-3.01624	0.00353795	0.660188
ENST00000572665	-1.32976	-0.147313	-3.01445	0.00355708	0.660188
ENST00000230480	-1.52275	1.32673	-3.01348	0.00355714	0.660188
ENST00000416235	-1.15979	3.16656	-3.01349	0.00356412	0.660188
ENST00000435224	-0.39647	7.50074	-3.01248	0.00356756	0.660188
ENST00000433750	-1.22082	0.786035	-3.00989	0.00359472	0.660563
ENST00000503537	-1.50794	1.61854	-3.00945	0.00360834	0.660563
ENST00000452930	1.28478	-0.555552	3.00746	0.00362119	0.660563
ENST00000533110	-1.32152	0.741993	-3.0067	0.00363957	0.660563
ENST00000325602	-1.47274	3.56535	-3.00426	0.00365933	0.660563
ENST00000576241	1.43743	-0.509004	3.00332	0.00366434	0.660563
ENST00000516652	-1.24579	-1.29103	-3.00173	0.00368767	0.660563
ENST00000288670	-0.438207	11.6805	-3.00092	0.00369007	0.660563
ENST00000221138	0.824233	3.32307	3.00074	0.00369212	0.660563
ENST00000587482	-1.22885	-0.691631	-3.00038	0.00369589	0.660563
ENST00000466597	-1.22691	0.887526	-2.99936	0.00371302	0.660563
ENST00000391141	-1.01081	5.1606	-2.99808	0.00372072	0.660563
ENST00000546615	-1.10935	-1.72168	-2.99715	0.00373085	0.660563
ENST00000447107	1.12642	0.495415	2.99597	0.00374366	0.660563
ENST00000614004	-0.978323	0.95618	-2.99603	0.00374741	0.660563
ENST00000483215	-1.26422	-0.852677	-2.99621	0.00375095	0.660563
ENST00000599907	-0.8857	3.10574	-2.9952	0.00375276	0.660563
ENST00000579991	-0.279888	8.45355	-2.99241	0.00378271	0.660563
ENST00000498452	1.19366	-1.82987	2.99175	0.00378995	0.660563
ENST00000461645	1.05666	1.28519	2.99342	0.00379195	0.660563
ENST00000415967	1.20957	-0.489334	2.99052	0.00380357	0.660563
ENST00000595036	-1.35938	0.0254684	-2.989	0.00382043	0.660563
ENST00000588712	-0.92698	2.4162	-2.9881	0.00383045	0.660563
ENST00000577346	1.24282	-0.0266102	2.98767	0.00383519	0.660563
ENST00000517994	-1.48844	2.90775	-2.98611	0.00385265	0.660563
ENST00000471941	0.518796	5.10674	2.98573	0.00385737	0.660563
ENST00000536093	1.1796	-1.47314	2.98552	0.00386483	0.660563
ENST00000548616	-0.924959	2.0028	-2.98445	0.00387127	0.660563
ENST00000222374	-0.330041	8.40205	-2.98438	0.00387217	0.660563
ENST00000479535	-1.23933	0.495287	-2.98519	0.00387371	0.660563
ENST00000580385	1.10586	0.621176	2.98417	0.00387444	0.660563
ENST00000489193	-0.603259	5.4034	-2.9835	0.00388201	0.660563
ENST00000381132	-1.15689	-1.01189	-2.98281	0.0038902	0.660563
ENST00000624650	-0.95002	1.9252	-2.98134	0.00390637	0.660563
ENST00000519118	-0.692305	3.87076	-2.98097	0.00391055	0.660563
ENST00000554759	1.21456	-1.58756	2.98013	0.00392307	0.660563
ENST00000559500	-1.13133	1.10046	-2.9798	0.00392395	0.660563
ENST00000638902	-0.662346	4.36489	-2.97903	0.00393266	0.660563
ENST00000361335	1.09816	7.61758	2.9787	0.00393641	0.660563
ENST00000552360	-0.579514	3.58656	-2.97653	0.00396137	0.660563
ENST00000607058	0.785405	2.72904	2.97537	0.00397703	0.660563
ENST00000426038	1.46165	-1.51264	2.97496	0.00397941	0.660563
ENST00000491587	1.38479	-1.1917	2.97422	0.0039879	0.660563
ENST00000544702	1.16577	-2.12509	2.97408	0.00398958	0.660563
ENST00000412649	0.534017	5.09435	2.97359	0.00399765	0.660563
ENST00000383789	-1.0067	1.79272	-2.97307	0.00400127	0.660563
ENST00000457760	1.22497	-1.0113	2.97337	0.00400355	0.660563
ENST00000482149	-0.991562	1.91335	-2.9725	0.00401645	0.660563
ENST00000495874	-1.03835	0.414551	-2.97095	0.00402593	0.660563
ENST00000422754	-1.06367	1.63231	-2.97014	0.00403535	0.660563
ENST00000565631	-1.24985	1.11021	-2.97	0.00403766	0.660563
ENST00000363217	0.737662	12.7486	2.96902	0.00405828	0.660563
ENST00000636363	-1.06589	1.40987	-2.96853	0.0040639	0.660563
ENST00000471682	1.29503	-0.995552	2.96802	0.00406541	0.660563
ENST00000405581	1.07541	0.890547	2.96652	0.00407785	0.660563
ENST00000570852	-1.16589	1.35549	-2.96588	0.00408549	0.660563
ENST00000596452	-1.12013	0.985171	-2.96522	0.00409332	0.660563
ENST00000514955	1.4379	-0.971322	2.96439	0.00410318	0.660563
ENST00000564676	-1.39427	0.310203	-2.96406	0.0041071	0.660563
ENST00000536349	-0.463905	6.80965	-2.96356	0.00411304	0.660563
ENST00000459810	1.12658	-1.02014	2.96354	0.00411806	0.660563
ENST00000502968	-1.34535	-0.0691649	-2.96022	0.00415288	0.664696
ENST00000272638	1.32972	-0.178231	2.95795	0.00418024	0.66564
ENST00000384762	-1.0715	4.34546	-2.95769	0.00418341	0.66564
ENST00000485522	-0.524709	3.66657	-2.95662	0.00419639	0.66564
ENST00000471733	-0.538587	4.31454	-2.9574	0.00419931	0.66564
ENST00000487766	0.979387	1.06271	2.95669	0.00420408	0.66564
ENST00000593591	-0.896363	1.97538	-2.95476	0.00421893	0.666554
ENST00000321250	1.22722	-0.485323	2.9526	0.00424531	0.669204
ENST00000509144	-1.46948	0.868829	-2.94887	0.00430429	0.669204
ENST00000531759	1.37366	-0.112204	2.94658	0.00431964	0.669204
ENST00000516344	-0.544665	3.69177	-2.94405	0.0043513	0.669204
ENST00000508743	-1.16425	0.0601577	-2.94335	0.00436003	0.669204
ENST00000558698	1.09595	0.507828	2.94259	0.00436967	0.669204
ENST00000453760	-1.52341	0.299754	-2.94003	0.00440201	0.669204
ENST00000489023	-0.797565	4.13507	-2.93966	0.00441395	0.669204
ENST00000474375	-1.20061	-0.663154	-2.93792	0.00442881	0.669204
ENST00000582786	-1.20416	0.840145	-2.93812	0.00442946	0.669204
ENST00000465062	1.39482	-1.63057	2.93754	0.00443363	0.669204
ENST00000263635	-0.31774	10.3833	-2.93746	0.00443458	0.669204
ENST00000409003	-0.351986	7.76455	-2.93613	0.00445157	0.669204
ENST00000648399	1.19997	-1.45108	2.93757	0.00446255	0.669204
ENST00000434168	1.22129	1.06562	2.93569	0.00446426	0.669204
ENST00000438545	1.0424	2.20304	2.93484	0.0044688	0.669204
ENST00000616986	-1.27311	0.436851	-2.9337	0.00448281	0.669204
ENST00000517956	-0.45725	7.2971	-2.93319	0.00448945	0.669204
ENST00000609522	-1.22891	-0.959593	-2.93275	0.00449506	0.669204
ENST00000465788	1.17685	-0.57698	2.93408	0.00449569	0.669204
ENST00000450996	1.71872	1.22264	2.9326	0.00449721	0.669204
ENST00000449024	1.34038	-1.17793	2.93469	0.00450146	0.669204
ENST00000557493	0.826662	1.71867	2.93178	0.00450765	0.669204
ENST00000487689	0.94249	1.35186	2.93143	0.0045122	0.669204
ENST00000548477	0.639436	2.78741	2.93264	0.00451734	0.669204
ENST00000361875	-0.287593	7.55837	-2.9309	0.00451991	0.669204
ENST00000582023	1.19076	-2.13936	2.93051	0.00452409	0.669204
ENST00000528790	-1.22623	2.9728	-2.93021	0.00452802	0.669204
ENST00000613386	-0.973667	4.63464	-2.93002	0.00453061	0.669204
ENST00000463018	-1.12447	1.50733	-2.9291	0.00454251	0.669204
ENST00000530970	-1.22881	-0.549831	-2.92905	0.00454316	0.669204
ENST00000319715	0.955654	2.7924	2.92896	0.00454817	0.669204
ENST00000506103	1.17772	-1.58939	2.92905	0.00454959	0.669204
ENST00000382751	-0.256812	8.57718	-2.9285	0.00455034	0.669204
ENST00000581703	1.31674	-1.50356	2.92841	0.00455452	0.669204
ENST00000478859	-0.416975	7.45181	-2.92662	0.00457496	0.669983
ENST00000651215	-1.24531	4.67628	-2.92589	0.0045855	0.669983
ENST00000592440	0.767733	1.88527	2.92628	0.00458717	0.669983
ENST00000574871	0.650271	3.33372	2.92433	0.00460509	0.670656
ENST00000458422	-1.21997	0.38809	-2.92361	0.00462437	0.670656
ENST00000529523	1.02811	0.121604	2.92258	0.00462822	0.670656
ENST00000403291	-0.44412	4.77995	-2.92258	0.0046283	0.670656
ENST00000381092	-1.16462	0.0672648	-2.91824	0.00468767	0.677922
ENST00000361453	0.898182	9.47052	2.91628	0.00471255	0.680181
ENST00000544745	1.29668	-0.892163	2.91445	0.00473789	0.68038
ENST00000258538	-1.02361	2.38545	-2.91471	0.00473908	0.68038
ENST00000412051	1.42286	0.481396	2.91409	0.00475026	0.68038
ENST00000578245	1.12686	-1.77104	2.91345	0.00475097	0.68038
ENST00000564514	1.25094	-1.30078	2.91165	0.00477542	0.680938
ENST00000323061	-0.517012	4.78609	-2.91219	0.00477809	0.680938
ENST00000635731	-0.813824	3.34412	-2.91163	0.00478354	0.680938
ENST00000564888	-0.880283	2.86475	-2.90931	0.00480753	0.680938
ENST00000523637	-0.807552	2.1603	-2.90926	0.00480827	0.680938
ENST00000449666	1.1194	-2.24322	2.9091	0.00481608	0.680938
ENST00000452145	-0.539655	7.09413	-2.90842	0.00481975	0.680938
ENST00000431363	1.29726	-0.894049	2.90682	0.0048448	0.682906
ENST00000384728	1.1621	-1.22986	2.90574	0.00485676	0.682906
ENST00000475726	1.28808	-1.59518	2.90584	0.00486157	0.682906
ENST00000502249	-0.745673	3.70311	-2.90398	0.00488131	0.683067
ENST00000504742	1.13288	-1.64691	2.90274	0.00489857	0.683067
ENST00000637525	-1.35796	0.522896	-2.90172	0.00491291	0.683067
ENST00000238994	-0.852769	3.84876	-2.90132	0.00491891	0.683067
ENST00000295208	-0.532517	6.08741	-2.8989	0.00495265	0.683067
ENST00000636652	-1.32876	-0.406694	-2.89843	0.00495929	0.683067
ENST00000568742	-1.17769	-1.1001	-2.89771	0.00497001	0.683067
ENST00000588190	-0.914091	2.26446	-2.89769	0.00497036	0.683067
ENST00000435941	-1.30897	-0.810955	-2.89763	0.00497061	0.683067
ENST00000537305	-0.647465	3.7074	-2.89685	0.00498504	0.683067
ENST00000357022	1.31525	-0.399455	2.89646	0.004991	0.683067
ENST00000427786	-0.922784	1.80522	-2.89507	0.00500698	0.683067
ENST00000468382	-0.63081	4.37808	-2.89396	0.0050228	0.683067
ENST00000269582	1.28831	-0.0403703	2.89495	0.00502872	0.683067
ENST00000307552	1.24133	-1.84313	2.89345	0.00503019	0.683067
ENST00000357376	-0.413973	6.08448	-2.89251	0.00504367	0.683067
ENST00000413421	-0.947299	-0.0683868	-2.892	0.00505092	0.683067
ENST00000546866	-1.1605	-1.59965	-2.89181	0.00505368	0.683067
ENST00000431514	-0.834384	2.55628	-2.89144	0.00505905	0.683067
ENST00000534125	1.17726	-0.839979	2.89141	0.00505944	0.683067
ENST00000482914	-0.967296	1.14881	-2.89043	0.00507377	0.683067
ENST00000546364	-0.905896	2.39783	-2.89006	0.00507897	0.683067
ENST00000376830	1.06171	3.31053	2.88939	0.00508893	0.683067
ENST00000554995	-0.602434	3.61374	-2.8891	0.00509289	0.683067
ENST00000560418	-0.83189	3.15607	-2.88894	0.00509516	0.683067
ENST00000443063	1.20246	-1.9408	2.89465	0.00513633	0.683721
ENST00000529592	-0.663356	3.82504	-2.88594	0.00513894	0.683721
ENST00000539593	1.11549	-1.69873	2.88549	0.0051455	0.683721
ENST00000650432	1.26359	-1.57667	2.88501	0.00515253	0.683721
ENST00000457326	-0.971072	3.96899	-2.88389	0.00517072	0.683721
ENST00000607417	-0.878227	7.34103	-2.88285	0.00518717	0.683721
ENST00000588151	-0.937007	2.07257	-2.88251	0.00518955	0.683721
ENST00000583156	-0.943787	2.45598	-2.88209	0.00519539	0.683721
ENST00000563563	1.30689	-1.25121	2.88202	0.00519649	0.683721
ENST00000600406	-1.654	0.825182	-2.88272	0.00519979	0.683721
ENST00000586538	1.2141	-1.71133	2.88191	0.00520241	0.683721
ENST00000504098	-1.00628	1.20068	-2.8807	0.0052191	0.68439
ENST00000347466	-0.841421	1.83519	-2.87892	0.00524276	0.68439
ENST00000377320	1.28536	-1.28605	2.87889	0.00524292	0.68439
ENST00000597945	1.24851	-0.370197	2.87871	0.0052456	0.68439
ENST00000534593	1.33502	-1.82236	2.87725	0.00526733	0.68439
ENST00000223864	-1.08808	1.05571	-2.87724	0.00526757	0.68439
ENST00000507520	-1.10157	0.929773	-2.87689	0.00527271	0.68439
ENST00000574268	1.12794	-0.0959609	2.87463	0.00530674	0.687592
ENST00000612472	-1.22736	0.279681	-2.87059	0.00536785	0.691472
ENST00000269399	1.34655	-1.22606	2.86905	0.00539126	0.691472
ENST00000400825	1.00425	1.48051	2.86889	0.00539372	0.691472
ENST00000489541	1.15813	-1.45352	2.86878	0.00539542	0.691472
ENST00000595541	-0.792186	2.31278	-2.86831	0.00540629	0.691472
ENST00000451193	-1.05924	1.27295	-2.86837	0.00540654	0.691472
ENST00000513250	-1.12169	0.281073	-2.86731	0.00541799	0.691472
ENST00000528804	0.613417	4.12805	2.86687	0.00542472	0.691472
ENST00000502261	-0.447359	8.34643	-2.86447	0.00546164	0.691472
ENST00000452814	1.24834	0.26964	2.86306	0.00550071	0.691472
ENST00000541763	1.2909	-1.0732	2.86153	0.00550732	0.691472
ENST00000450289	0.946283	1.41632	2.86196	0.00551653	0.691472
ENST00000581549	-1.20864	-0.464888	-2.86328	0.00553102	0.691472
ENST00000379922	-1.07513	-0.0303176	-2.85969	0.00553604	0.691472
ENST00000547253	-0.572794	3.14067	-2.8579	0.00556419	0.691472
ENST00000651802	1.65822	0.824852	2.85884	0.00556793	0.691472
ENST00000435383	-1.01401	1.39079	-2.85827	0.00556992	0.691472
ENST00000262811	-0.33273	8.6165	-2.85699	0.00557851	0.691472
ENST00000568252	-0.702466	4.0533	-2.8568	0.00558157	0.691472
ENST00000363484	-1.0919	5.99164	-2.85727	0.00558227	0.691472
ENST00000503000	-1.09084	1.64454	-2.85662	0.00558443	0.691472
ENST00000450065	1.32785	-1.10242	2.85561	0.00560035	0.691472
ENST00000566567	1.04473	-0.425905	2.85425	0.00562235	0.691472
ENST00000557045	-1.16953	-0.548391	-2.8532	0.00563851	0.691472
ENST00000620597	-1.22838	-1.24965	-2.85258	0.0056484	0.691472
ENST00000567776	1.05033	1.55719	2.85171	0.00566233	0.691472
ENST00000514577	1.21917	-1.17338	2.85219	0.00566976	0.691472
ENST00000487278	1.1354	0.287521	2.85063	0.00567963	0.691472
ENST00000576247	-1.05646	-0.343309	-2.85039	0.005696	0.691472
ENST00000578780	-0.96304	1.31877	-2.84854	0.00572465	0.691472
ENST00000430050	1.24632	-1.83214	2.84705	0.00574234	0.691472
ENST00000594656	-1.21617	-0.690463	-2.84894	0.00574972	0.691472
ENST00000625720	1.11903	0.192833	2.84547	0.00576295	0.691472
ENST00000409641	-1.14157	-0.0393888	-2.84488	0.00577335	0.691472
ENST00000520588	1.11855	-1.98796	2.84409	0.00578543	0.691472
ENST00000526722	1.03938	-2.01171	2.84382	0.00578969	0.691472
ENST00000642922	1.19203	-1.72932	2.84294	0.0058041	0.691472
ENST00000316836	-0.300914	6.75733	-2.84253	0.00581555	0.691472
ENST00000546640	1.44965	-0.406444	2.84221	0.00581615	0.691472
ENST00000364961	-1.51971	0.639284	-2.84185	0.00582205	0.691472
ENST00000549259	-0.949437	0.746092	-2.84165	0.00582521	0.691472
ENST00000507082	1.16564	-1.76672	2.84161	0.00582594	0.691472
ENST00000582634	-0.49326	4.19769	-2.84121	0.00583255	0.691472
ENST00000566823	-0.563595	3.63285	-2.83891	0.00587046	0.691472
ENST00000592703	1.04847	0.275159	2.83871	0.00587367	0.691472
ENST00000644160	1.06577	0.816694	2.83758	0.00592524	0.691472
ENST00000361381	0.895004	10.6839	2.83512	0.00593332	0.691472
ENST00000456957	-0.976518	1.6277	-2.83472	0.00593999	0.691472
ENST00000617833	0.775197	1.985	2.83441	0.0059451	0.691472
ENST00000322301	1.77567	1.7897	2.83432	0.0059574	0.691472
ENST00000282878	-0.870632	4.40944	-2.83373	0.00595805	0.691472
ENST00000606298	1.02165	0.921551	2.83281	0.00597207	0.691472
ENST00000318445	-0.341379	6.22365	-2.83218	0.00598252	0.691472
ENST00000533417	0.829682	1.45495	2.83196	0.00598634	0.691472
ENST00000318493	1.20368	-0.884768	2.83297	0.00600188	0.691472
ENST00000539241	-1.21661	0.458741	-2.82887	0.00603847	0.691472
ENST00000642160	-0.500931	3.90331	-2.82918	0.00604165	0.691472
ENST00000518942	-1.22914	0.474979	-2.82832	0.0060481	0.691472
ENST00000578916	1.38896	0.0952603	2.8283	0.00604818	0.691472
ENST00000595845	-1.27568	0.147225	-2.82736	0.00606409	0.691472
ENST00000406361	1.00405	0.0675754	2.82762	0.00607406	0.691472
ENST00000608010	-0.842688	2.49222	-2.82666	0.00607846	0.691472
ENST00000433650	-0.571219	3.83389	-2.82639	0.00608072	0.691472
ENST00000478475	1.06438	-0.321052	2.82475	0.00610876	0.691472
ENST00000303921	-0.338889	9.46807	-2.82474	0.00610881	0.691472
ENST00000431607	-0.808471	2.21972	-2.82457	0.00611511	0.691472
ENST00000422914	-1.27015	1.29994	-2.82455	0.0061152	0.691472
ENST00000302085	0.843428	1.37771	2.8237	0.00612677	0.691472
ENST00000371059	-1.12904	-1.55479	-2.82323	0.00613491	0.691472
ENST00000470761	-0.946602	1.02595	-2.82324	0.00613918	0.691472
ENST00000369838	-0.363167	5.79739	-2.82317	0.00614213	0.691472
ENST00000580044	-1.07361	-0.60286	-2.82155	0.00616382	0.691472
ENST00000540203	0.708052	2.1268	2.82109	0.00617176	0.691472
ENST00000502416	-1.23262	-0.752037	-2.82003	0.00619247	0.691472
ENST00000553064	-0.468777	4.92559	-2.81969	0.00620455	0.691472
ENST00000484265	-0.464645	3.41049	-2.81876	0.00621218	0.691472
ENST00000509383	-0.666539	2.25028	-2.81861	0.00621474	0.691472
ENST00000518283	-0.758253	1.99052	-2.81915	0.00621593	0.691472
ENST00000376398	-1.4794	0.24672	-2.81788	0.00622758	0.691472
ENST00000521411	1.46409	-1.89015	2.81666	0.00624889	0.691472
ENST00000617539	-0.836201	2.95349	-2.8166	0.00625093	0.691472
ENST00000605153	-1.10781	4.35315	-2.81696	0.00625212	0.691472
ENST00000485242	0.947809	0.605803	2.81613	0.00625972	0.691472
ENST00000400128	-1.11609	-0.424269	-2.8154	0.0062709	0.691472
ENST00000485621	-1.03408	0.183531	-2.81534	0.00627204	0.691472
ENST00000502521	0.438474	5.13229	2.81574	0.00628557	0.691472
ENST00000253794	-1.09157	-0.233544	-2.81411	0.00629362	0.691472
ENST00000506987	-1.11245	-0.764093	-2.81261	0.0063201	0.691472
ENST00000570980	1.18383	0.036394	2.81227	0.00632628	0.691472
ENST00000435791	-1.22861	0.438944	-2.81222	0.00632708	0.691472
ENST00000484882	-0.480759	6.27441	-2.81106	0.00634761	0.691472
ENST00000319863	1.1507	0.275505	2.81024	0.00636211	0.691472
ENST00000572629	1.06036	0.53213	2.81015	0.00636368	0.691472
ENST00000498559	1.15436	-1.60359	2.80847	0.0063953	0.691472
ENST00000483268	0.895666	1.14046	2.80877	0.00639704	0.691472
ENST00000582671	1.3317	-1.20739	2.80661	0.00643236	0.691472
ENST00000300862	1.25985	-0.211492	2.80622	0.00643568	0.691472
ENST00000588358	1.18128	-1.39082	2.80649	0.00643847	0.691472
ENST00000549369	-1.3551	0.217867	-2.80575	0.00644412	0.691472
ENST00000622143	-1.12611	-0.784637	-2.80565	0.00644427	0.691472
ENST00000421285	1.15453	2.86019	2.80557	0.00644573	0.691472
ENST00000575922	-1.3389	2.11089	-2.80514	0.00645351	0.691472
ENST00000470168	1.0791	-0.924037	2.80507	0.00645474	0.691472
ENST00000366663	1.7453	3.32656	2.8046	0.00646327	0.691472
ENST00000513811	-1.06804	0.610876	-2.80445	0.006466	0.691472
ENST00000318724	-0.980749	0.130101	-2.80509	0.00646736	0.691472
ENST00000497928	0.78358	1.91593	2.8025	0.0065025	0.691472
ENST00000516482	-1.00108	0.928417	-2.80313	0.00650394	0.691472
ENST00000524579	-0.600565	3.67339	-2.80275	0.00651579	0.691472
ENST00000300456	-0.329224	5.99614	-2.8004	0.00653996	0.691472
ENST00000624433	1.21413	0.258726	2.7999	0.00654861	0.691472
ENST00000510863	1.2272	-1.01953	2.79934	0.00655886	0.691472
ENST00000502424	-0.484078	5.93883	-2.79799	0.00658365	0.691472
ENST00000587646	0.863921	1.44713	2.79844	0.00658794	0.691472
ENST00000434275	-0.994655	-1.48085	-2.79816	0.00659469	0.691472
ENST00000511214	1.01692	0.598627	2.79733	0.00659569	0.691472
ENST00000264431	-0.460032	4.0708	-2.79592	0.00662171	0.691472
ENST00000439674	0.949045	1.69412	2.79589	0.00662506	0.691472
ENST00000394852	1.07842	-1.44587	2.79547	0.00663002	0.691472
ENST00000434216	1.30704	-0.761316	2.79467	0.00664472	0.691472
ENST00000549659	-0.954657	2.58441	-2.79447	0.00664858	0.691472
ENST00000465284	-0.555141	3.3506	-2.79356	0.0066653	0.691472
ENST00000466151	-0.4666	6.4043	-2.79231	0.00668867	0.691472
ENST00000494119	-0.491579	4.95302	-2.79151	0.00670413	0.691472
ENST00000369816	-0.740311	3.40473	-2.79162	0.00670931	0.691472
ENST00000606771	-1.13337	-0.646716	-2.79269	0.00672072	0.691472
ENST00000589107	-0.667221	3.70013	-2.7905	0.0067225	0.691472
ENST00000529252	1.56952	-0.117103	2.78949	0.00674138	0.691472
ENST00000390981	-0.901257	8.96638	-2.78968	0.00674166	0.691472
ENST00000651067	-1.03442	4.15905	-2.78872	0.00675678	0.691472
ENST00000604971	-0.747187	2.70845	-2.78834	0.00676292	0.691472
ENST00000508237	0.53185	6.24049	2.78762	0.00677768	0.691472
ENST00000428832	-1.29005	0.0168501	-2.78716	0.00678526	0.691472
ENST00000523276	-0.747501	2.38482	-2.78701	0.00679123	0.691472
ENST00000556977	-0.947004	1.79658	-2.7868	0.00679206	0.691472
ENST00000644428	1.18192	-0.512965	2.78677	0.00679252	0.691472
ENST00000473818	-1.23332	-0.670489	-2.78684	0.00680321	0.691472
ENST00000619867	1.20189	-1.63683	2.78597	0.00680921	0.691472
ENST00000546585	-1.19923	0.464116	-2.78492	0.00682753	0.691472
ENST00000534003	1.34365	1.1415	2.7845	0.0068463	0.691472
ENST00000489060	-0.988874	0.614984	-2.78377	0.00684939	0.691472
ENST00000592837	-0.862798	2.18774	-2.78393	0.00684958	0.691472
ENST00000557412	-0.48093	3.9793	-2.7835	0.00685464	0.691472
ENST00000264059	0.883167	3.63096	2.78334	0.00685772	0.691472
ENST00000585594	-1.14655	1.56246	-2.78294	0.00686528	0.691472
ENST00000481208	1.24593	-0.334643	2.78217	0.00688001	0.691472
ENST00000507102	1.06827	-1.49629	2.78176	0.00688779	0.691472
ENST00000642216	-1.1488	-0.310691	-2.78199	0.00689167	0.691472
ENST00000517662	-1.1051	1.7942	-2.78156	0.00689474	0.691472
ENST00000258963	1.13071	-1.95386	2.7818	0.00689525	0.691472
ENST00000578162	1.80179	0.912621	2.78141	0.00689734	0.691472
ENST00000365512	-1.01383	0.739543	-2.78097	0.00690295	0.691472
ENST00000383763	-1.17118	1.21338	-2.78087	0.00690509	0.691472
ENST00000529349	-1.08181	-0.698177	-2.78033	0.0069153	0.691472
ENST00000532581	-0.982347	0.595903	-2.78022	0.00691738	0.691472
ENST00000525314	-1.09092	0.786797	-2.77976	0.00692626	0.691472
ENST00000637973	-0.819215	2.29037	-2.77967	0.00692805	0.691472
ENST00000552411	-1.14876	-0.711134	-2.77957	0.00693229	0.691472
ENST00000489883	0.956942	0.609073	2.77884	0.00694391	0.691472
ENST00000551324	-1.12355	-1.13594	-2.77846	0.00695122	0.691472
ENST00000575147	-1.2835	-0.0773713	-2.778	0.006968	0.691472
ENST00000455170	1.20386	-0.303524	2.77667	0.00698583	0.691472
ENST00000479271	-0.494681	4.79195	-2.77643	0.00699092	0.691472
ENST00000402119	1.17085	-1.57783	2.77524	0.00701369	0.691472
ENST00000638210	-0.430838	6.11233	-2.77523	0.00701386	0.691472
ENST00000298492	-0.366553	5.51246	-2.77495	0.0070194	0.691472
ENST00000384304	-1.21755	3.84642	-2.77442	0.00703082	0.691472
ENST00000639845	-1.08508	0.29595	-2.77411	0.00703572	0.691472
ENST00000300873	-0.788932	2.68255	-2.77371	0.00704351	0.691472
ENST00000371852	-1.64282	3.04942	-2.77357	0.00704727	0.691472
ENST00000524160	1.19965	-1.79272	2.7733	0.0070554	0.691472
ENST00000299727	-0.721757	5.05481	-2.77291	0.00705909	0.691472
ENST00000534099	1.2521	0.712689	2.77257	0.00706578	0.691472
ENST00000485802	1.2084	0.1904	2.77202	0.00707661	0.691472
ENST00000553505	-1.33918	0.369698	-2.77137	0.00708943	0.691472
ENST00000554990	-0.398378	6.61139	-2.77125	0.0070918	0.691472
ENST00000534336	0.352108	11.1279	2.77107	0.00709526	0.691472
ENST00000567855	1.13061	-0.926719	2.77094	0.00709779	0.691472
ENST00000514111	-1.21082	-1.11429	-2.77043	0.00710793	0.691472
ENST00000467510	-1.18052	-0.168275	-2.77082	0.00711411	0.691472
ENST00000543785	-1.15798	2.02564	-2.76951	0.00712803	0.691472
ENST00000443700	-1.16388	-0.806611	-2.76914	0.00713337	0.691472
ENST00000468164	-0.487019	4.19699	-2.76896	0.00713686	0.691472
ENST00000584864	1.14718	-1.69273	2.76982	0.00713937	0.691472
ENST00000369558	1.1558	0.831416	2.76891	0.0071449	0.691472
ENST00000609423	0.699493	2.69336	2.76853	0.00714544	0.691472
ENST00000329970	-0.600316	3.69865	-2.76842	0.00714748	0.691472
ENST00000526042	-0.730976	2.90386	-2.76732	0.00716975	0.691472
ENST00000611654	1.19477	-0.629191	2.7673	0.00716982	0.691472
ENST00000515924	-1.07568	2.44433	-2.76719	0.00717196	0.691472
ENST00000362257	-1.21046	-1.45476	-2.76671	0.00718439	0.691472
ENST00000414095	1.137	-1.67055	2.76654	0.00718476	0.691472
ENST00000577411	1.15031	-1.64098	2.76741	0.00718637	0.691472
ENST00000488292	1.25879	-0.733347	2.76634	0.00719231	0.691472
ENST00000427371	-0.670977	2.66716	-2.76607	0.00719415	0.691472
ENST00000584557	1.30302	0.00412635	2.76533	0.00721619	0.691472
ENST00000441521	-0.514719	6.01061	-2.76495	0.00721656	0.691472
ENST00000562888	1.16384	0.285876	2.76468	0.00722201	0.691472
ENST00000235835	1.17354	-1.04967	2.76643	0.00723367	0.691472
ENST00000384583	-0.795612	4.01358	-2.76307	0.00725408	0.691472
ENST00000642825	1.17316	-2.16396	2.76339	0.00725416	0.691472
ENST00000602406	-0.840979	1.65644	-2.76304	0.00725475	0.691472
ENST00000485755	-1.11737	0.275663	-2.76258	0.00726411	0.691472
ENST00000227451	-0.654497	8.83064	-2.76248	0.00726596	0.691472
ENST00000443023	-0.784993	2.60968	-2.76313	0.00726617	0.691472
ENST00000569858	0.936195	2.42216	2.76193	0.00727704	0.691611
ENST00000429124	-0.280284	7.63898	-2.7585	0.00734962	0.694651
ENST00000636158	-1.10699	0.277353	-2.75803	0.00735664	0.694651
ENST00000329468	-0.785656	6.10897	-2.75752	0.00736769	0.694651
ENST00000465697	-0.880473	2.08369	-2.75723	0.00737219	0.694651
ENST00000397821	1.15656	1.62665	2.75729	0.00737483	0.694651
ENST00000535680	1.0902	-1.88193	2.75754	0.00737812	0.694651
ENST00000531235	-0.969128	0.702297	-2.7563	0.00739218	0.694651
ENST00000569225	-0.997284	1.54844	-2.75688	0.00739593	0.694651
ENST00000544352	1.13942	-1.47036	2.75585	0.00740032	0.694651
ENST00000489509	0.504306	3.39906	2.75562	0.00740517	0.694651
ENST00000304191	-0.937246	2.63716	-2.75523	0.00741304	0.694651
ENST00000504600	1.06844	-0.444048	2.75412	0.0074358	0.695596
ENST00000407684	-0.771835	2.96401	-2.75382	0.00744206	0.695596
ENST00000557238	-0.547023	5.36678	-2.75234	0.00747246	0.697462
ENST00000397637	-0.666964	6.03765	-2.75203	0.00748102	0.697462
ENST00000547169	-0.778876	1.51066	-2.75043	0.0075119	0.698871
ENST00000636147	-0.928628	2.32681	-2.75028	0.00751515	0.698871
ENST00000491840	-1.22083	-0.120145	-2.74893	0.00755333	0.699173
ENST00000469877	-0.434429	4.37067	-2.74743	0.00757439	0.699173
ENST00000613857	1.08999	-0.922594	2.74438	0.00763835	0.699173
ENST00000388106	1.25987	-0.914786	2.74418	0.00764251	0.699173
ENST00000364704	1.20213	-0.664079	2.74395	0.00764729	0.699173
ENST00000476927	-0.750125	1.91118	-2.7429	0.00766967	0.699173
ENST00000635995	1.11161	-1.40043	2.74286	0.00767027	0.699173
ENST00000440421	-1.13778	0.0479432	-2.74053	0.00772437	0.699173
ENST00000003100	-0.689468	4.42984	-2.73915	0.00774943	0.699173
ENST00000252575	-0.789934	5.47743	-2.7392	0.00775182	0.699173
ENST00000595200	-1.09379	0.982946	-2.73808	0.00777179	0.699173
ENST00000469089	-0.871584	1.89354	-2.73798	0.00777408	0.699173
ENST00000626994	-1.09361	-0.578878	-2.73795	0.0077746	0.699173
ENST00000423968	1.27448	0.645041	2.73835	0.007775	0.699173
ENST00000538941	0.675079	1.91853	2.73792	0.00777525	0.699173
ENST00000364432	-1.11073	5.40775	-2.73769	0.0077807	0.699173
ENST00000565246	-0.610602	3.61001	-2.73759	0.00779197	0.699173
ENST00000576129	1.08507	0.11318	2.73992	0.00779423	0.699173
ENST00000256999	-0.510623	5.16591	-2.73566	0.00782368	0.699173
ENST00000574657	-1.29774	0.70188	-2.73549	0.00782741	0.699173
ENST00000541072	1.11461	-1.88035	2.73554	0.00783076	0.699173
ENST00000609585	0.980666	-1.98395	2.73531	0.00783124	0.699173
ENST00000264377	-0.628089	3.51523	-2.73427	0.00785594	0.699173
ENST00000590248	-1.15335	0.0355982	-2.73318	0.00787724	0.699173
ENST00000505065	-1.04876	0.691793	-2.73331	0.00788614	0.699173
ENST00000522167	-0.622295	3.39736	-2.73245	0.00789314	0.699173
ENST00000264025	-0.405411	7.73233	-2.73225	0.00789736	0.699173
ENST00000448648	-1.03911	1.99563	-2.73219	0.00789882	0.699173
ENST00000377126	0.584319	7.53418	2.73218	0.00790617	0.699173
ENST00000357949	-1.23291	1.20721	-2.73177	0.00790794	0.699173
ENST00000453517	-1.21807	-1.14787	-2.73178	0.00790926	0.699173
ENST00000590371	-0.588296	3.2746	-2.73124	0.00792915	0.699173
ENST00000434150	1.25217	-1.39597	2.72993	0.00794792	0.699173
ENST00000458003	-1.05486	-0.546702	-2.72935	0.00796062	0.699173
ENST00000448660	-1.04416	-1.03227	-2.72917	0.00796449	0.699173
ENST00000305031	-0.968429	2.44359	-2.72872	0.00797425	0.699173
ENST00000651179	-0.960205	2.67119	-2.72861	0.00797968	0.699173
ENST00000605123	1.29409	2.22889	2.72825	0.00798465	0.699173
ENST00000368547	-0.367425	6.7677	-2.728	0.00799291	0.699173
ENST00000555101	1.08682	-0.702138	2.72753	0.00800033	0.699173
ENST00000330793	-1.14596	1.91132	-2.72752	0.00800069	0.699173
ENST00000469997	-0.747887	1.36447	-2.72743	0.00800263	0.699173
ENST00000508355	-0.584883	2.3813	-2.72736	0.00800426	0.699173
ENST00000426654	1.08102	-1.6772	2.72732	0.00800561	0.699173
ENST00000457242	0.684167	2.30719	2.72721	0.00800749	0.699173
ENST00000631455	-0.375231	7.93651	-2.72718	0.00800818	0.699173
ENST00000623271	-0.378409	5.27118	-2.727	0.00801413	0.699173
ENST00000612509	1.0379	1.06112	2.72724	0.00801458	0.699173
ENST00000308742	0.448091	5.04638	2.72656	0.00802164	0.699173
ENST00000464506	0.672743	2.53975	2.72557	0.00804355	0.699173
ENST00000476145	-1.03937	0.707554	-2.72598	0.00804846	0.699173
ENST00000551661	-1.02921	0.104447	-2.72591	0.00804868	0.699173
ENST00000410646	-0.858591	1.71269	-2.72531	0.00804927	0.699173
ENST00000296657	1.23836	2.11375	2.7245	0.00806792	0.699173
ENST00000373921	1.1408	1.49277	2.72347	0.00809411	0.699173
ENST00000592154	-0.549705	3.79704	-2.72329	0.00809767	0.699173
ENST00000466144	-1.32306	0.0571282	-2.72313	0.00809829	0.699173
ENST00000595860	1.06811	-1.90196	2.7229	0.00811339	0.699173
ENST00000219400	-0.397959	5.46843	-2.72218	0.00811864	0.699173
ENST00000506232	1.25105	-0.489779	2.7218	0.00812721	0.699173
ENST00000510078	1.17877	-0.854259	2.7216	0.00813927	0.699173
ENST00000432327	-1.22079	-1.09916	-2.72071	0.00815148	0.699173
ENST00000297369	-1.11607	0.282027	-2.72084	0.00815162	0.699173
ENST00000442508	-0.664545	2.58312	-2.72027	0.00816133	0.699173
ENST00000508948	0.846729	2.20983	2.72009	0.00816528	0.699173
ENST00000524809	0.748153	1.82871	2.71948	0.00817887	0.699173
ENST00000367296	-0.49707	3.37664	-2.71924	0.00818428	0.699173
ENST00000622121	-0.608632	3.73827	-2.71884	0.00819837	0.699173
ENST00000414209	0.98298	-1.91553	2.71767	0.00821947	0.699173
ENST00000555087	1.38052	-0.633053	2.7176	0.00822349	0.699173
ENST00000507337	0.950663	2.55609	2.71738	0.00822602	0.699173
ENST00000483871	-0.53451	5.58972	-2.71714	0.00823207	0.699173
ENST00000562838	-1.07154	-0.130742	-2.71667	0.00824217	0.699173
ENST00000378161	-0.950448	1.10878	-2.71659	0.00824381	0.699173
ENST00000556851	-1.02661	1.38056	-2.71656	0.00824447	0.699173
ENST00000601559	-0.798037	4.59552	-2.71635	0.00824931	0.699173
ENST00000543159	-1.10457	-0.393922	-2.71627	0.00825121	0.699173
ENST00000470164	1.25221	-1.55506	2.71561	0.00826609	0.699627
ENST00000569908	-0.98485	2.74003	-2.71481	0.00828405	0.700075
ENST00000502929	-1.06236	-0.0862946	-2.71423	0.00829733	0.700075
ENST00000371614	-1.04902	1.16822	-2.71411	0.00829997	0.700075
ENST00000610509	-0.43201	4.18276	-2.71338	0.00831661	0.700632
ENST00000261483	-0.292455	10.7918	-2.71272	0.0083316	0.700632
ENST00000238616	0.450591	3.44399	2.71204	0.00834711	0.700632
ENST00000462766	-0.495676	4.96294	-2.71164	0.00835617	0.700632
ENST00000648422	-0.413727	4.81146	-2.71189	0.0083572	0.700632
ENST00000493359	-0.983437	0.808896	-2.71141	0.00836707	0.700632
ENST00000456310	1.07512	-1.84898	2.71062	0.00837956	0.700632
ENST00000479308	1.00306	-0.565464	2.70991	0.00839575	0.700632
ENST00000553858	1.20414	-1.90738	2.70968	0.00840125	0.700632
ENST00000572301	1.52591	0.425898	2.70947	0.00840656	0.700632
ENST00000531958	1.56883	0.869929	2.71099	0.00841838	0.700632
ENST00000577114	-0.523147	4.07459	-2.70881	0.00842101	0.700632
ENST00000546957	-1.14864	-0.563129	-2.70854	0.00843067	0.700642
ENST00000468856	-0.432251	5.53868	-2.70767	0.00844743	0.701242
ENST00000459255	-0.984572	1.96485	-2.70633	0.00847826	0.703007
ENST00000517905	-0.994596	1.72283	-2.70503	0.00850846	0.703954
ENST00000580926	1.11577	-1.01148	2.70501	0.00850885	0.703954
ENST00000340926	-0.419681	4.99283	-2.70497	0.00853496	0.70522
ENST00000572977	-1.02814	1.01898	-2.70353	0.00854335	0.70522
ENST00000472002	0.988847	0.815994	2.70261	0.00856493	0.705483
ENST00000366541	0.800207	2.51737	2.70113	0.00859959	0.705483
ENST00000497424	0.931068	1.08257	2.70107	0.00860082	0.705483
ENST00000518516	-1.23602	2.3226	-2.70078	0.00860771	0.705483
ENST00000472518	0.479813	4.9595	2.70061	0.00861161	0.705483
ENST00000581958	1.20242	-1.5322	2.7008	0.00861339	0.705483
ENST00000387347	0.644694	11.8746	2.70049	0.0086145	0.705483
ENST00000478048	-1.14918	-0.595962	-2.70047	0.00862336	0.705483
ENST00000549719	-1.04843	0.376819	-2.69935	0.00865642	0.705485
ENST00000466288	-1.23233	0.903104	-2.69953	0.00865725	0.705485
ENST00000437104	-1.17958	-0.691623	-2.69815	0.00866954	0.705485
ENST00000308666	-0.586043	3.98996	-2.69808	0.00867685	0.705485
ENST00000494101	-0.525793	4.0546	-2.6978	0.00867783	0.705485
ENST00000516637	1.07232	-1.78367	2.69767	0.008681	0.705485
ENST00000452591	1.10878	-1.52348	2.69656	0.00870727	0.705704
ENST00000461826	-1.03871	0.620897	-2.69655	0.0087075	0.705704
ENST00000650422	-0.901634	0.736569	-2.6961	0.00871804	0.705704
ENST00000520279	-0.525835	4.16031	-2.69487	0.00874745	0.705704
ENST00000624919	0.636385	4.36613	2.69486	0.00874758	0.705704
ENST00000512954	-1.09586	-0.0729503	-2.69458	0.00875433	0.705704
ENST00000361390	0.772945	9.28925	2.69437	0.0087592	0.705704
ENST00000612208	-0.501087	5.53474	-2.69399	0.00876834	0.705704
ENST00000439875	1.16272	-2.01564	2.6931	0.00878971	0.705704
ENST00000619654	1.14115	2.41315	2.69228	0.00880942	0.705704
ENST00000441775	-1.15631	-0.48568	-2.69161	0.00882525	0.705704
ENST00000384863	-0.967754	-1.86693	-2.69203	0.00882839	0.705704
ENST00000447343	1.17027	-0.597055	2.69129	0.00883295	0.705704
ENST00000577571	-1.22218	1.84107	-2.69127	0.00883358	0.705704
ENST00000395471	1.61992	1.29657	2.69122	0.00883503	0.705704
ENST00000507748	0.94735	1.54497	2.69106	0.00883869	0.705704
ENST00000585223	-0.992986	1.33312	-2.69037	0.00886037	0.705704
ENST00000503335	-1.19151	0.376349	-2.69002	0.00886369	0.705704
ENST00000621058	1.15973	-0.510572	2.6895	0.00887624	0.705704
ENST00000372851	-1.0912	1.78853	-2.68883	0.00889386	0.705704
ENST00000379319	-1.06298	-0.27723	-2.68829	0.00890535	0.705704
ENST00000560587	-0.695188	2.04561	-2.68815	0.00891102	0.705704
ENST00000431844	-1.21031	0.118488	-2.68767	0.00892042	0.705704
ENST00000596510	-0.484335	7.12529	-2.68715	0.00893294	0.705704
ENST00000534706	1.04649	-1.76336	2.68648	0.0089493	0.705704
ENST00000306897	1.21176	-1.41133	2.68619	0.0089564	0.705704
ENST00000635856	-0.641972	2.8009	-2.68558	0.00897249	0.705704
ENST00000551880	1.22928	-0.817568	2.68563	0.0089773	0.705704
ENST00000505406	-1.20132	-0.552349	-2.68554	0.00897752	0.705704
ENST00000624092	-1.49536	0.821816	-2.68501	0.00898511	0.705704
ENST00000442399	0.838706	1.51988	2.68441	0.00899988	0.705704
ENST00000539677	-0.971836	1.10217	-2.68406	0.00901127	0.705704
ENST00000507787	0.755908	2.72863	2.68362	0.00901914	0.705704
ENST00000618550	-0.673423	3.56612	-2.68356	0.00902218	0.705704
ENST00000567432	-1.28716	-0.012935	-2.68354	0.00902584	0.705704
ENST00000374161	-1.19017	0.637935	-2.68301	0.00904049	0.705704
ENST00000464520	0.869586	3.22327	2.68258	0.00904457	0.705704
ENST00000410176	1.0247	-1.61895	2.68628	0.00905785	0.705704
ENST00000561996	1.21176	-1.86649	2.68514	0.00905833	0.705704
ENST00000557562	1.09301	-0.2133	2.68142	0.00907316	0.705971
ENST00000463261	0.557965	3.42678	2.6811	0.00908097	0.705971
ENST00000338356	1.19141	-1.34651	2.68061	0.00909925	0.706644
ENST00000565193	1.04552	0.703679	2.67976	0.00911402	0.707044
ENST00000399816	-0.825942	2.66783	-2.67879	0.00914066	0.707579
ENST00000624300	1.79178	2.3079	2.6781	0.00915574	0.707579
ENST00000581655	-0.949646	1.31144	-2.67805	0.0091564	0.707579
ENST00000579263	1.10667	0.153028	2.67738	0.00917315	0.707579
ENST00000361321	0.991516	1.42514	2.67735	0.0091738	0.707579
ENST00000514381	-1.25136	0.296266	-2.67729	0.00917871	0.707579
ENST00000327939	-1.21491	0.673485	-2.67705	0.00918899	0.707629
ENST00000586611	0.943813	3.54224	2.67622	0.00920203	0.707892
ENST00000454379	1.10579	-1.31751	2.68152	0.00921293	0.707989
ENST00000280481	-0.884622	4.19516	-2.67431	0.00924961	0.710065
ENST00000562740	1.14478	-1.57125	2.67373	0.00926428	0.710269
ENST00000494435	-0.576349	3.29567	-2.67337	0.00927336	0.710269
ENST00000384360	-0.727192	6.27774	-2.67292	0.00928471	0.710269
ENST00000507357	1.19854	-0.0070142	2.67325	0.00929095	0.710269
ENST00000592632	-1.01456	-0.687174	-2.67164	0.00931692	0.710624
ENST00000568895	1.12994	-1.78136	2.6714	0.00932309	0.710624
ENST00000373010	-0.989957	1.23206	-2.67097	0.0093339	0.710624
ENST00000591515	-0.918644	1.93559	-2.67094	0.00933442	0.710624
ENST00000265138	0.406475	6.42911	2.67027	0.00935425	0.710624
ENST00000529490	1.04034	-2.03181	2.66962	0.00936798	0.710624
ENST00000264709	-0.309593	7.85511	-2.66906	0.00938202	0.710624
ENST00000430766	0.853538	2.04572	2.6691	0.00938451	0.710624
ENST00000310624	-0.961196	6.19548	-2.66846	0.00940735	0.710624
ENST00000513965	-0.994248	-0.730564	-2.66935	0.00941117	0.710624
ENST00000623179	-0.448958	4.44068	-2.66785	0.00941292	0.710624
ENST00000554359	1.19664	-1.2457	2.66769	0.00941693	0.710624
ENST00000462353	-1.00547	1.5014	-2.66703	0.00943669	0.710624
ENST00000498274	1.1493	-1.0054	2.66666	0.00944318	0.710624
ENST00000289013	0.857093	2.80431	2.6661	0.00945763	0.710624
ENST00000539695	1.2319	-1.61876	2.66582	0.00946474	0.710624
ENST00000511479	-1.0626	-1.18567	-2.66552	0.00947232	0.710624
ENST00000604324	2.01042	0.319111	2.66565	0.00947525	0.710624
ENST00000477028	1.00001	-1.07367	2.66521	0.00948042	0.710624
ENST00000622757	-0.335268	7.96407	-2.66444	0.00950008	0.710624
ENST00000495212	1.13539	-0.920453	2.66415	0.00950748	0.710624
ENST00000417796	1.32561	0.751752	2.66403	0.0095172	0.710624
ENST00000584099	1.12822	-1.74414	2.66374	0.00951806	0.710624
ENST00000442264	-0.598275	2.64415	-2.6632	0.009532	0.710659
ENST00000551597	-0.594377	3.62133	-2.66332	0.00953787	0.710659
ENST00000509925	-1.04456	0.756076	-2.66121	0.00958326	0.713317
ENST00000562940	-0.979938	1.38446	-2.66075	0.00959996	0.713837
ENST00000377604	0.959048	-0.578068	2.65986	0.00962373	0.71488
ENST00000558900	1.08761	-1.42726	2.65887	0.00964812	0.715492
ENST00000583704	0.935002	2.14854	2.65883	0.00965144	0.715492
ENST00000481137	1.05615	-1.73665	2.65471	0.00975278	0.720458
ENST00000507458	1.25363	-1.699	2.65441	0.00976085	0.720458
ENST00000502687	-0.571344	3.24089	-2.65343	0.00978669	0.720458
ENST00000568199	0.497044	4.57342	2.65332	0.00978949	0.720458
ENST00000532265	-1.02655	-1.68429	-2.65283	0.00980246	0.720458
ENST00000316757	1.09501	1.28854	2.65287	0.00980493	0.720458
ENST00000496230	0.948698	1.06407	2.65136	0.00984128	0.720458
ENST00000647102	1.12695	0.00317776	2.65137	0.00984479	0.720458
ENST00000524633	-0.84931	2.08287	-2.65161	0.00984684	0.720458
ENST00000567100	-0.864729	1.06912	-2.65098	0.00985138	0.720458
ENST00000528999	-1.09292	0.344035	-2.65106	0.00985206	0.720458
ENST00000367434	-0.497107	5.32671	-2.65075	0.0098575	0.720458
ENST00000641626	-1.00996	2.28362	-2.65066	0.00985999	0.720458
ENST00000362006	1.25088	-0.720343	2.65024	0.00987099	0.720458
ENST00000558779	-0.952781	0.649598	-2.6501	0.00989157	0.720458
ENST00000429591	-1.01794	1.28187	-2.64904	0.00990303	0.720458
ENST00000395315	-0.414288	5.67843	-2.64867	0.00991279	0.720458
ENST00000412403	-1.00521	1.13809	-2.64865	0.00991348	0.720458
ENST00000516672	-0.336163	10.0874	-2.64827	0.00992352	0.720458
ENST00000265071	-0.595663	3.41952	-2.64792	0.0099328	0.720458
ENST00000282146	-0.995161	1.18891	-2.64783	0.00994152	0.720458
ENST00000510779	0.996496	-1.26071	2.64707	0.00995555	0.720458
ENST00000474842	1.01874	-0.385766	2.64583	0.00998896	0.720458
ENST00000529304	1.09772	-0.503746	2.64561	0.0099948	0.720458
ENST00000604556	-1.18006	-0.777606	-2.64542	0.0100001	0.720458
ENST00000381624	1.18824	-1.49659	2.64584	0.0100034	0.720458
ENST00000479769	0.941432	0.668217	2.6446	0.0100222	0.720458
ENST00000527475	-0.808684	3.88086	-2.64408	0.010036	0.720458
ENST00000600775	-1.03961	0.398028	-2.644	0.0100383	0.720458
ENST00000580501	-0.765342	3.27894	-2.64367	0.0100471	0.720458
ENST00000528138	1.14685	-1.16647	2.64361	0.0100489	0.720458
ENST00000642266	-0.427398	5.59158	-2.6433	0.0100571	0.720458
ENST00000644980	0.980346	-2.18292	2.64308	0.0100631	0.720458
ENST00000467095	1.0572	-1.86204	2.64256	0.0100771	0.720458
ENST00000637840	0.901006	1.33604	2.64195	0.0100946	0.720458
ENST00000615788	0.820091	1.33897	2.64188	0.0100957	0.720458
ENST00000367311	0.491315	5.62037	2.64172	0.0101	0.720458
ENST00000578234	0.905649	1.35651	2.64166	0.0101016	0.720458
ENST00000266087	1.25302	0.580506	2.64134	0.0101103	0.720458
ENST00000261588	0.356064	6.62993	2.6413	0.0101113	0.720458
ENST00000386037	-0.582742	8.22082	-2.64077	0.0101258	0.720458
ENST00000638890	-0.903502	3.00621	-2.6406	0.0101303	0.720458
ENST00000257359	-0.598847	4.73027	-2.63974	0.0101542	0.721461
ENST00000465601	-0.436769	4.83232	-2.63885	0.0101782	0.72181
ENST00000466471	-0.943098	1.04427	-2.63883	0.0101788	0.72181
ENST00000592137	-1.17993	-0.852416	-2.63806	0.0101999	0.722221
ENST00000405396	1.03754	-0.742171	2.6379	0.0102043	0.722221
ENST00000251287	-0.438983	9.36541	-2.63736	0.010219	0.722404
ENST00000545346	-0.351056	5.90315	-2.63668	0.0102375	0.722404
ENST00000337227	-0.630857	3.0082	-2.63637	0.0102463	0.722404
ENST00000482924	-0.996613	-1.43549	-2.64017	0.0102502	0.722404
ENST00000445533	-0.893112	-1.28833	-2.63547	0.0102722	0.722404
ENST00000611446	1.49586	1.76044	2.6368	0.0102769	0.722404
ENST00000448202	0.716028	2.3082	2.63537	0.0102809	0.722404
ENST00000482131	-1.0323	0.512082	-2.63495	0.0102897	0.722404
ENST00000581459	1.08065	-1.8633	2.63441	0.0103002	0.722404
ENST00000408667	-0.967604	-1.64963	-2.634	0.0103116	0.722404
ENST00000584180	-1.091	-1.28398	-2.63392	0.010315	0.722404
ENST00000391237	-0.823436	1.42178	-2.63385	0.0103255	0.722452
ENST00000391162	-0.394932	8.3832	-2.63293	0.0103411	0.722511
ENST00000560404	-0.589708	3.43395	-2.63272	0.0103479	0.722511
ENST00000467843	0.593579	4.10242	2.63261	0.0103559	0.722511
ENST00000471894	-1.06479	-1.29818	-2.62996	0.0104238	0.723265
ENST00000533965	-0.714716	1.8871	-2.62953	0.0104358	0.723265
ENST00000260818	0.734327	4.22929	2.62957	0.0104616	0.723265
ENST00000510786	-0.932454	1.45814	-2.62855	0.010472	0.723265
ENST00000476940	-1.10567	0.0245099	-2.62779	0.0104845	0.723265
ENST00000541674	1.15657	1.69695	2.62772	0.010487	0.723265
ENST00000551487	-0.885643	0.857257	-2.62736	0.0104966	0.723265
ENST00000616300	0.830523	1.68365	2.627	0.0105068	0.723265
ENST00000580294	-1.08034	0.070449	-2.62656	0.0105192	0.723265
ENST00000426537	0.530412	4.76981	2.6273	0.010522	0.723265
ENST00000469482	-0.619143	3.26239	-2.6261	0.0105323	0.723265
ENST00000605830	-0.806371	2.68828	-2.62585	0.0105391	0.723265
ENST00000464683	-1.18234	0.416389	-2.62657	0.0105413	0.723265
ENST00000352460	1.098	-0.582561	2.62536	0.010553	0.723265
ENST00000402742	1.3382	-0.865408	2.62465	0.010573	0.723265
ENST00000608933	0.3946	6.15028	2.62444	0.0105798	0.723265
ENST00000518190	-1.10952	-0.349932	-2.62382	0.0105966	0.723265
ENST00000428459	1.11801	-0.864677	2.62394	0.0105994	0.723265
ENST00000601148	0.978858	-1.62538	2.62307	0.0106316	0.723265
ENST00000521064	-0.902382	0.619941	-2.6218	0.0106635	0.723265
ENST00000406902	-1.0478	1.74965	-2.62136	0.0106665	0.723265
ENST00000475365	-0.801875	2.29168	-2.62124	0.0106735	0.723265
ENST00000611650	0.605696	2.15802	2.62107	0.010675	0.723265
ENST00000650302	-0.740853	2.4198	-2.62099	0.0106771	0.723265
ENST00000498680	-1.15796	0.567723	-2.62099	0.0106771	0.723265
ENST00000568720	0.998692	0.834842	2.62064	0.0106871	0.723265
ENST00000652600	-1.0061	1.16757	-2.62087	0.010698	0.723265
ENST00000555980	-0.882247	-1.09387	-2.62019	0.0107001	0.723265
ENST00000616444	1.38744	0.454069	2.62016	0.0107025	0.723265
ENST00000364587	-0.95165	7.1422	-2.61961	0.0107165	0.723265
ENST00000411807	-1.1372	0.511538	-2.61952	0.0107222	0.723265
ENST00000640868	1.01692	-1.10101	2.61908	0.0107317	0.723265
ENST00000504438	-1.04532	-0.730448	-2.61826	0.0107555	0.723265
ENST00000539611	-1.07177	-0.394535	-2.61817	0.0107578	0.723265
ENST00000610458	-1.06624	0.400264	-2.61815	0.0107585	0.723265
ENST00000321453	1.17675	-0.302562	2.61815	0.0107588	0.723265
ENST00000384176	-1.08572	2.35557	-2.61834	0.0107589	0.723265
ENST00000384158	-0.922332	6.53025	-2.61758	0.0107748	0.723265
ENST00000635464	-1.02254	-0.810897	-2.61911	0.010777	0.723265
ENST00000267113	1.02901	-1.60997	2.61748	0.0107777	0.723265
ENST00000601990	-1.15776	0.530978	-2.61739	0.0107804	0.723265
ENST00000494812	-0.919091	1.05219	-2.61709	0.0107893	0.723265
ENST00000522939	1.09343	-0.00716747	2.61857	0.0107902	0.723265
ENST00000620315	0.993561	0.940158	2.61566	0.0108303	0.723265
ENST00000643628	-0.835611	1.29969	-2.61553	0.0108391	0.723265
ENST00000533165	1.13408	-0.0584841	2.615	0.0108495	0.723265
ENST00000458793	-1.01907	0.184899	-2.61534	0.0108503	0.723265
ENST00000373605	-1.05788	-0.586962	-2.61521	0.0108601	0.723265
ENST00000494607	-1.00594	1.23096	-2.61444	0.0108673	0.723265
ENST00000568129	-0.92403	-1.41277	-2.61437	0.0108678	0.723265
ENST00000637180	1.18073	-0.978453	2.61455	0.0108707	0.723265
ENST00000414251	1.00198	-0.379271	2.61311	0.0109041	0.723265
ENST00000570400	-1.21152	0.266093	-2.61284	0.010912	0.723265
ENST00000343788	-0.858372	1.2879	-2.61275	0.0109148	0.723265
ENST00000541959	-1.05527	-1.09412	-2.61178	0.0109463	0.723265
ENST00000503991	-0.68149	3.99097	-2.61151	0.0109509	0.723265
ENST00000563824	1.05635	0.214396	2.61098	0.0109665	0.723265
ENST00000382346	0.985046	-1.70437	2.61088	0.0109692	0.723265
ENST00000296861	-0.341422	7.46763	-2.61124	0.0109711	0.723265
ENST00000254661	1.05779	-1.55375	2.61081	0.0109714	0.723265
ENST00000467792	-0.986583	-1.20417	-2.6111	0.0109723	0.723265
ENST00000639092	-0.936005	-1.54826	-2.60938	0.0110134	0.723265
ENST00000601484	0.575032	2.51646	2.60913	0.0110206	0.723265
ENST00000384744	-0.944859	8.23383	-2.60897	0.0110254	0.723265
ENST00000587451	-1.00105	-0.552174	-2.60883	0.0110297	0.723265
ENST00000456729	-1.01278	0.618382	-2.60889	0.011043	0.723265
ENST00000487180	1.13133	-1.41896	2.60941	0.0110508	0.723265
ENST00000579652	-1.07175	1.31172	-2.60816	0.0110578	0.723265
ENST00000260702	-0.928628	2.49405	-2.6077	0.011064	0.723265
ENST00000475487	-0.967327	0.415905	-2.6069	0.0110872	0.723265
ENST00000580054	1.07517	-0.474917	2.60664	0.0110939	0.723265
ENST00000458797	-0.379765	9.37351	-2.60653	0.0110973	0.723265
ENST00000507710	-0.52309	4.91979	-2.60616	0.0111087	0.723265
ENST00000518098	-0.752278	3.45984	-2.60613	0.0111124	0.723265
ENST00000261024	-0.950119	2.75916	-2.60622	0.0111133	0.723265
ENST00000581646	-1.06166	-0.604934	-2.60527	0.0111347	0.723265
ENST00000533453	-0.681056	2.53645	-2.60482	0.0111535	0.723265
ENST00000559364	-0.968589	1.78278	-2.60442	0.0111598	0.723265
ENST00000651247	-1.39993	1.73934	-2.60441	0.0111603	0.723265
ENST00000614849	-1.1415	0.0814645	-2.6043	0.0111634	0.723265
ENST00000452014	-1.06856	-1.5813	-2.60427	0.0111677	0.723265
ENST00000361227	0.826787	6.07993	2.6038	0.0111784	0.723265
ENST00000640390	-0.52662	3.90302	-2.60323	0.0111951	0.723265
ENST00000427220	0.747026	4.43028	2.60294	0.0112063	0.723265
ENST00000397512	0.8832	1.55163	2.60271	0.0112184	0.723265
ENST00000520251	-0.969722	1.93088	-2.60217	0.0112268	0.723265
ENST00000577576	-1.03575	1.28864	-2.60197	0.011233	0.723265
ENST00000493632	-1.01107	2.79174	-2.60152	0.011256	0.723265
ENST00000330212	-1.02745	-1.73693	-2.60105	0.0112604	0.723265
ENST00000415254	1.11776	0.779895	2.60099	0.0112622	0.723265
ENST00000358355	-1.07566	-0.991559	-2.6004	0.0112846	0.723265
ENST00000469971	-0.942069	-1.79142	-2.5999	0.0112995	0.723265
ENST00000410250	1.19461	-1.2587	2.60456	0.0113164	0.723265
ENST00000559419	-0.842892	2.00581	-2.59911	0.0113187	0.723265
ENST00000522795	1.21298	-0.587607	2.59871	0.0113306	0.723265
ENST00000635806	-0.983351	-0.813631	-2.59855	0.0113356	0.723265
ENST00000306315	0.886417	0.699145	2.59853	0.0113361	0.723265
ENST00000366523	-1.01346	-0.824573	-2.59865	0.0113363	0.723265
ENST00000381980	-1.00836	0.896645	-2.59855	0.0113413	0.723265
ENST00000366621	-0.607646	4.38761	-2.59727	0.0113743	0.72375
ENST00000259818	-0.543334	4.66274	-2.59721	0.0113929	0.72375
ENST00000470665	0.937808	0.697755	2.59911	0.011396	0.72375
ENST00000481940	-1.39439	0.204055	-2.59696	0.0114067	0.72375
ENST00000416539	-0.965	1.19498	-2.59619	0.0114074	0.72375
ENST00000385196	-0.862282	1.70889	-2.59615	0.011408	0.72375
ENST00000471411	1.79105	0.156488	2.59514	0.011439	0.724182
ENST00000331968	-0.901522	1.66231	-2.59501	0.0114431	0.724182
ENST00000364177	1.08804	-0.45158	2.59495	0.0114444	0.724182
ENST00000309539	-1.24548	3.08303	-2.5936	0.0114888	0.725646
ENST00000561376	-0.439336	4.80042	-2.5934	0.0114917	0.725646
ENST00000460019	-0.868252	1.47403	-2.5937	0.0114994	0.725646
ENST00000482269	1.13651	-0.955813	2.59477	0.0115071	0.725646
ENST00000361789	0.725317	9.1497	2.59114	0.0115608	0.727541
ENST00000362396	-0.862799	7.29882	-2.59103	0.0115643	0.727541
ENST00000505000	-1.0226	0.123881	-2.5912	0.011573	0.727541
ENST00000531146	-1.07802	0.477783	-2.59032	0.011586	0.727541
ENST00000626249	-0.919453	2.40316	-2.59031	0.0115877	0.727541
ENST00000361739	0.708258	9.76456	2.58953	0.0116102	0.727541
ENST00000363538	-1.05992	-0.925084	-2.58787	0.0116617	0.727541
ENST00000557083	-1.0406	2.36589	-2.58772	0.0116663	0.727541
ENST00000613958	0.951391	0.382306	2.58768	0.0116675	0.727541
ENST00000293670	-1.36514	1.41269	-2.5876	0.0116703	0.727541
ENST00000331825	-0.515688	8.36929	-2.58808	0.0116729	0.727541
ENST00000389520	-0.871798	1.34952	-2.58664	0.0117005	0.727541
ENST00000495607	1.13687	-0.958106	2.58658	0.0117015	0.727541
ENST00000445744	-2.27949	4.78278	-2.5865	0.0117041	0.727541
ENST00000459957	1.02323	-1.49096	2.58618	0.0117141	0.727541
ENST00000378634	1.05411	-0.95431	2.58751	0.0117286	0.727541
ENST00000489146	-0.874391	0.30456	-2.58508	0.0117483	0.727541
ENST00000612463	-1.6287	0.738185	-2.58462	0.0117629	0.727541
ENST00000560646	-0.942528	3.28427	-2.58436	0.0117705	0.727541
ENST00000490232	0.599901	14.8902	2.58329	0.0118041	0.727541
ENST00000463545	-1.16748	-1.32115	-2.58326	0.0118205	0.727541
ENST00000637750	1.14315	-0.0365461	2.58266	0.0118238	0.727541
ENST00000373548	-0.887201	1.6002	-2.58206	0.0118424	0.727541
ENST00000585561	-1.09115	-0.686755	-2.58207	0.0118488	0.727541
ENST00000625038	1.23063	-1.79482	2.58142	0.0118627	0.727541
ENST00000459963	-0.879821	1.63012	-2.581	0.0118759	0.727541
ENST00000216085	1.22393	-0.866756	2.58032	0.0118971	0.727541
ENST00000652500	-0.571709	3.17887	-2.58041	0.0118986	0.727541
ENST00000621275	-0.499692	6.2189	-2.58026	0.0118991	0.727541
ENST00000522344	-0.90061	0.718902	-2.58018	0.0119015	0.727541
ENST00000525384	-0.859054	1.58224	-2.5803	0.0119141	0.727541
ENST00000332912	-1.09787	0.253971	-2.57915	0.0119342	0.727541
ENST00000393330	1.02219	-1.04731	2.57873	0.0119476	0.727541
ENST00000592024	-0.805342	1.82003	-2.57849	0.0119551	0.727541
ENST00000540115	-0.9388	2.06802	-2.57858	0.0119676	0.727541
ENST00000534964	0.930092	1.43821	2.57796	0.0119719	0.727541
ENST00000561677	-1.03209	-0.597186	-2.57803	0.011972	0.727541
ENST00000643918	0.603755	4.6213	2.57762	0.0119896	0.727541
ENST00000517927	-1.29756	0.111098	-2.57735	0.011991	0.727541
ENST00000431116	-1.22606	-0.0243342	-2.57713	0.0119981	0.727541
ENST00000571554	1.19676	-1.06861	2.57656	0.0120257	0.727541
ENST00000624318	-0.433714	5.02688	-2.57603	0.0120331	0.727541
ENST00000412490	0.960818	0.447905	2.57624	0.0120343	0.727541
ENST00000432504	0.987562	0.811107	2.57589	0.0120389	0.727541
ENST00000514132	-0.834761	2.36281	-2.5757	0.0120436	0.727541
ENST00000623426	-0.702751	3.6544	-2.57393	0.0121001	0.727541
ENST00000464455	0.89766	0.74283	2.5738	0.0121042	0.727541
ENST00000582623	-0.665108	3.04108	-2.57366	0.0121087	0.727541
ENST00000544096	0.43825	4.05271	2.57385	0.012111	0.727541
ENST00000595967	0.93913	0.281451	2.57332	0.0121197	0.727541
ENST00000254528	-0.564507	6.92901	-2.57318	0.0121315	0.727541
ENST00000512442	-0.392201	5.94501	-2.57286	0.0121343	0.727541
ENST00000490651	1.08003	-1.80947	2.57299	0.0121421	0.727541
ENST00000511877	-1.03049	1.16906	-2.57261	0.0121424	0.727541
ENST00000364043	-0.876982	6.55018	-2.57247	0.0121469	0.727541
ENST00000559164	1.00576	-0.611464	2.57236	0.0121504	0.727541
ENST00000482997	1.00723	-0.535336	2.57226	0.0121536	0.727541
ENST00000524463	-0.968884	2.73504	-2.57177	0.0121698	0.727541
ENST00000608981	1.01119	-1.69721	2.57166	0.0121729	0.727541
ENST00000296318	-0.823335	2.31876	-2.5707	0.0122036	0.727541
ENST00000651271	-0.957649	1.92078	-2.57056	0.0122082	0.727541
ENST00000618589	-1.13697	0.991568	-2.5701	0.0122232	0.727541
ENST00000517204	-1.16307	1.36134	-2.57062	0.0122267	0.727541
ENST00000257527	-0.492572	5.28902	-2.56985	0.0122326	0.727541
ENST00000374024	-1.21882	0.221513	-2.56973	0.0122357	0.727541
ENST00000606664	1.26727	-0.410744	2.57116	0.0122456	0.727541
ENST00000528056	0.864116	1.3851	2.57023	0.0122482	0.727541
ENST00000523490	-0.586262	3.70171	-2.56924	0.0122508	0.727541
ENST00000449143	-1.10724	0.244895	-2.5691	0.0122553	0.727541
ENST00000374767	-0.567075	4.42197	-2.56892	0.0122657	0.727541
ENST00000525359	0.940238	-1.64343	2.56863	0.0122705	0.727541
ENST00000480824	-0.256485	7.27272	-2.56904	0.0122707	0.727541
ENST00000469944	-0.728461	2.1449	-2.56853	0.0122737	0.727541
ENST00000530824	-0.986883	2.12305	-2.56845	0.0122764	0.727541
ENST00000511959	-0.847635	1.93742	-2.56832	0.0122805	0.727541
ENST00000624814	-0.315917	11.0638	-2.56792	0.0122937	0.727541
ENST00000312438	1.08579	-1.86907	2.56891	0.0122996	0.727541
ENST00000623036	0.704428	1.3371	2.56666	0.0123344	0.729009
ENST00000342694	-1.09339	-0.755255	-2.56617	0.0123505	0.729374
ENST00000650301	-1.09369	-1.11377	-2.56429	0.0124193	0.729729
ENST00000408537	-1.0508	0.207966	-2.56371	0.0124309	0.729729
ENST00000487466	1.0409	-0.615706	2.56436	0.0124317	0.729729
ENST00000637671	-1.0183	-0.487957	-2.562	0.012498	0.729729
ENST00000525049	-0.997812	-1.33416	-2.56161	0.0125	0.729729
ENST00000567712	0.644217	2.2825	2.56157	0.0125011	0.729729
ENST00000318565	0.878439	2.91655	2.56156	0.0125016	0.729729
ENST00000602492	1.11679	-1.52124	2.56192	0.0125203	0.729729
ENST00000556542	-0.421252	6.13157	-2.56073	0.0125287	0.729729
ENST00000606080	-0.382969	6.89991	-2.56062	0.0125326	0.729729
ENST00000559300	1.16177	0.615312	2.55968	0.0125634	0.729729
ENST00000560663	-0.923706	2.54641	-2.55943	0.0125719	0.729729
ENST00000474153	-0.774785	1.68972	-2.55974	0.0125785	0.729729
ENST00000469578	-1.37526	1.75042	-2.55994	0.0125811	0.729729
ENST00000621186	-1.07286	-1.22947	-2.5589	0.0125895	0.729729
ENST00000561321	1.19965	0.166051	2.55876	0.0125941	0.729729
ENST00000263265	1.00892	2.13776	2.55848	0.0126032	0.729729
ENST00000448120	0.765745	1.78407	2.55825	0.0126109	0.729729
ENST00000489708	0.900975	-1.65104	2.55818	0.0126132	0.729729
ENST00000482665	0.938501	2.65074	2.55852	0.0126134	0.729729
ENST00000370215	1.08346	-1.73903	2.55745	0.0126377	0.729729
ENST00000517676	0.708199	2.92408	2.55743	0.0126382	0.729729
ENST00000648869	-1.11916	0.617476	-2.55756	0.0126418	0.729729
ENST00000361681	0.756074	6.81826	2.55712	0.0126484	0.729729
ENST00000588925	-0.888159	1.24984	-2.55698	0.0126533	0.729729
ENST00000649818	-0.982899	0.53057	-2.55749	0.0126557	0.729729
ENST00000620105	-0.737945	3.83059	-2.55661	0.0126656	0.729729
ENST00000468943	1.00614	-1.47786	2.55619	0.0126795	0.729729
ENST00000459959	-0.452596	3.87028	-2.55598	0.0126865	0.729729
ENST00000496495	1.1078	-1.07234	2.55572	0.0126951	0.729729
ENST00000582827	-0.933701	2.15756	-2.55588	0.012709	0.729729
ENST00000485866	-0.937885	-0.779639	-2.55593	0.0127134	0.729729
ENST00000530585	1.05749	-1.191	2.55494	0.0127214	0.729729
ENST00000638163	1.02134	-1.73194	2.55438	0.0127399	0.729729
ENST00000599000	1.0914	-0.798662	2.55387	0.0127594	0.729729
ENST00000493418	0.736614	1.94238	2.55327	0.0127784	0.729729
ENST00000447404	-0.608506	3.78844	-2.55338	0.0127846	0.729729
ENST00000608663	-0.916083	-0.19044	-2.55239	0.0128067	0.729729
ENST00000583528	-1.1261	0.0910725	-2.55209	0.0128171	0.729729
ENST00000395540	-0.402978	5.36737	-2.55205	0.012825	0.729729
ENST00000384281	-0.800428	8.27233	-2.55145	0.0128385	0.729729
ENST00000582343	-0.509765	4.67353	-2.55133	0.0128426	0.729729
ENST00000455411	-1.01504	0.205453	-2.55096	0.0128549	0.729729
ENST00000652099	1.03828	-0.131325	2.55118	0.0128563	0.729729
ENST00000498327	1.01182	-1.70634	2.55078	0.0128611	0.729729
ENST00000384785	1.13565	-1.39995	2.55052	0.0128699	0.729729
ENST00000597989	-0.636673	3.14585	-2.5504	0.0128742	0.729729
ENST00000646875	-1.41339	-0.464837	-2.54994	0.0128895	0.729729
ENST00000592793	1.00023	-1.15832	2.54898	0.012922	0.729729
ENST00000540240	-0.765831	2.03015	-2.54883	0.012929	0.729729
ENST00000485535	1.20162	2.12901	2.54989	0.0129321	0.729729
ENST00000504300	0.944964	-1.49862	2.54861	0.0129347	0.729729
ENST00000463698	-1.00455	0.542846	-2.54819	0.0129492	0.729729
ENST00000457168	-0.511098	3.35481	-2.54811	0.0129516	0.729729
ENST00000582010	-0.524032	3.5487	-2.54804	0.0129539	0.729729
ENST00000591998	0.611682	2.18213	2.54788	0.0129596	0.729729
ENST00000550135	0.279225	7.10406	2.54782	0.0129614	0.729729
ENST00000559857	-0.729315	1.85395	-2.5477	0.0129657	0.729729
ENST00000485756	0.812604	0.866703	2.54755	0.0129706	0.729729
ENST00000512775	1.04453	-0.970859	2.54761	0.0129758	0.729729
ENST00000363610	-1.13964	0.353286	-2.54716	0.0129841	0.729729
ENST00000604914	-0.885914	1.44395	-2.54678	0.0129969	0.729729
ENST00000512091	-0.359725	5.87531	-2.54611	0.0130196	0.729729
ENST00000608651	1.04954	-0.0322537	2.54611	0.0130199	0.729729
ENST00000375408	-0.995977	0.649461	-2.5461	0.01302	0.729729
ENST00000548358	-0.863213	1.15297	-2.54647	0.013028	0.729729
ENST00000379987	1.03803	1.02704	2.54578	0.0130507	0.729729
ENST00000594864	-0.975631	-1.1025	-2.54489	0.0130614	0.729729
ENST00000426428	-0.981311	3.94654	-2.54482	0.0130641	0.729729
ENST00000489821	1.01266	-2.17365	2.54423	0.0130843	0.729729
ENST00000478428	1.03014	-0.669336	2.54374	0.0131009	0.729729
ENST00000406360	0.821265	1.3185	2.54367	0.0131036	0.729729
ENST00000365444	-0.892091	1.82658	-2.54322	0.0131188	0.729729
ENST00000437441	-0.915816	0.418282	-2.54296	0.0131278	0.729729
ENST00000588382	-1.06273	0.134041	-2.54291	0.0131294	0.729729
ENST00000506421	-1.19291	1.82937	-2.54291	0.0131376	0.729729
ENST00000450820	-0.87919	2.4651	-2.54158	0.0131777	0.729729
ENST00000554480	-1.01631	-0.48012	-2.54126	0.0131865	0.729729
ENST00000647444	0.813619	1.76967	2.54117	0.0131897	0.729729
ENST00000464060	-0.360105	6.42858	-2.54129	0.0131925	0.729729
ENST00000505958	-0.508185	4.16367	-2.54099	0.0131959	0.729729
ENST00000557778	1.1653	-0.863252	2.54068	0.0132065	0.729729
ENST00000634823	1.07283	-1.75148	2.54068	0.0132065	0.729729
ENST00000442138	-0.458222	3.89874	-2.54075	0.0132072	0.729729
ENST00000576222	-0.845201	0.816946	-2.54009	0.013234	0.729729
ENST00000287771	1.04057	-1.73157	2.53945	0.0132493	0.729729
ENST00000400380	1.14793	-0.949378	2.53939	0.0132575	0.729729
ENST00000463240	-1.03483	0.972506	-2.53938	0.0132593	0.729729
ENST00000392693	0.959141	0.49314	2.53916	0.0132596	0.729729
ENST00000596581	-1.00142	2.0393	-2.53886	0.0132696	0.729729
ENST00000554662	-0.707366	2.34459	-2.53885	0.0132702	0.729729
ENST00000327891	-1.09076	-1.28635	-2.53884	0.0132703	0.729729
ENST00000504204	-1.0574	-0.895347	-2.53843	0.0132847	0.72997
ENST00000497120	-0.723292	1.9015	-2.5377	0.0133101	0.730821
ENST00000641117	0.999255	0.0302764	2.53619	0.0133629	0.732661
ENST00000524683	-0.626173	2.70532	-2.53519	0.0133976	0.732661
ENST00000474346	-1.078	1.42439	-2.53497	0.0134074	0.732661
ENST00000308736	0.333496	6.66566	2.53474	0.0134136	0.732661
ENST00000485656	1.10469	-1.21053	2.53469	0.013429	0.732661
ENST00000465749	-0.993626	0.204998	-2.53415	0.0134344	0.732661
ENST00000363299	-1.24975	1.51904	-2.53392	0.0134423	0.732661
ENST00000553344	-1.03253	-0.88025	-2.53383	0.0134454	0.732661
ENST00000557366	-0.941362	1.94214	-2.53338	0.0134613	0.732661
ENST00000417120	-0.481269	3.65599	-2.53303	0.0134737	0.732661
ENST00000486515	-1.03395	-0.263946	-2.53301	0.0134745	0.732661
ENST00000312600	0.598146	2.55103	2.53221	0.0135026	0.732661
ENST00000548896	-0.895306	0.691239	-2.53215	0.0135046	0.732661
ENST00000478895	1.03625	-0.787617	2.53208	0.0135071	0.732661
ENST00000466092	0.971663	-1.01967	2.53208	0.0135071	0.732661
ENST00000362490	-1.05288	-1.30412	-2.53225	0.0135116	0.732661
ENST00000402237	-0.689616	2.64141	-2.53197	0.0135131	0.732661
ENST00000471911	0.813239	1.2033	2.53193	0.0135364	0.732703
ENST00000454175	-0.454721	3.72529	-2.53015	0.0135755	0.732703
ENST00000624831	-0.307743	8.27616	-2.52988	0.0135853	0.732703
ENST00000586178	1.12225	2.51615	2.53001	0.0135877	0.732703
ENST00000459723	0.900543	0.862446	2.52981	0.0136058	0.732703
ENST00000458195	-1.06546	-0.517584	-2.52884	0.013622	0.732703
ENST00000634847	-0.895665	0.21173	-2.52843	0.0136366	0.732703
ENST00000592680	0.665348	2.68092	2.52827	0.0136425	0.732703
ENST00000622285	-1.18607	2.58086	-2.52817	0.0136461	0.732703
ENST00000636759	-1.27662	0.267269	-2.5279	0.0136555	0.732703
ENST00000588315	1.00679	-1.40909	2.52695	0.0136895	0.732703
ENST00000328090	1.24195	1.7234	2.52688	0.0136942	0.732703
ENST00000490818	0.904815	-0.799466	2.52669	0.0136988	0.732703
ENST00000559181	1.08691	-1.2746	2.52655	0.0137038	0.732703
ENST00000478408	-0.910416	1.19233	-2.52637	0.0137176	0.732703
ENST00000551627	1.07233	-0.602235	2.52628	0.0137222	0.732703
ENST00000261667	-0.314903	6.87849	-2.52537	0.0137543	0.732703
ENST00000545223	0.98891	-1.6087	2.52456	0.0137752	0.732703
ENST00000473474	-0.871105	1.13547	-2.5244	0.0137808	0.732703
ENST00000565873	1.28662	1.097	2.52374	0.0138049	0.732703
ENST00000567503	0.697178	2.55212	2.52358	0.0138103	0.732703
ENST00000588432	-0.900535	1.48634	-2.5234	0.0138171	0.732703
ENST00000510828	-0.863232	0.679914	-2.52332	0.0138198	0.732703
ENST00000481114	1.05072	-1.58613	2.52353	0.0138235	0.732703
ENST00000604183	1.12097	-0.0985324	2.52292	0.0138341	0.732703
ENST00000380815	-0.961532	2.26057	-2.52283	0.0138375	0.732703
ENST00000457754	1.15907	-1.29225	2.52177	0.0138769	0.732703
ENST00000572886	-0.983269	-0.424608	-2.52137	0.0138901	0.732703
ENST00000518364	-0.929402	-1.22688	-2.52131	0.0138928	0.732703
ENST00000644027	0.950405	0.261927	2.52118	0.0138971	0.732703
ENST00000556764	-0.777963	2.13747	-2.5213	0.0139004	0.732703
ENST00000601739	-0.952372	-1.83773	-2.5208	0.013911	0.732703
ENST00000510360	0.915572	1.73569	2.52076	0.0139123	0.732703
ENST00000530233	-1.14184	-0.328494	-2.52076	0.0139123	0.732703
ENST00000652741	1.00673	-1.942	2.52101	0.0139126	0.732703
ENST00000364729	-0.699168	5.25364	-2.52064	0.0139174	0.732703
ENST00000534156	-0.908764	0.0576938	-2.52013	0.0139351	0.732703
ENST00000523861	-0.336103	6.78634	-2.51994	0.0139423	0.732703
ENST00000328024	-0.305765	7.12917	-2.51978	0.0139532	0.732703
ENST00000641433	0.598944	2.88803	2.51951	0.0139627	0.732703
ENST00000559095	-1.21656	-0.0316292	-2.51933	0.0139649	0.732703
ENST00000565400	-1.16286	1.26507	-2.51907	0.0139802	0.732703
ENST00000443445	-0.82666	5.89074	-2.51858	0.0140079	0.732703
ENST00000421462	-0.631617	4.20805	-2.51799	0.0140138	0.732703
ENST00000514382	1.04729	-0.780568	2.5179	0.0140166	0.732703
ENST00000381787	-0.934462	-0.395094	-2.51789	0.0140168	0.732703
ENST00000394011	-0.616448	3.15771	-2.51788	0.0140173	0.732703
ENST00000496589	1.26434	-0.490355	2.51788	0.0140194	0.732703
ENST00000170564	0.477623	3.0986	2.51776	0.0140245	0.732703
ENST00000461818	0.909524	-1.93502	2.51964	0.0140312	0.732703
ENST00000512118	-0.571617	4.82901	-2.51739	0.0140351	0.732703
ENST00000588533	-1.02228	-1.22956	-2.51696	0.0140556	0.732703
ENST00000521686	-0.516777	4.83513	-2.51688	0.0140835	0.732703
ENST00000623254	-0.96769	0.56917	-2.51608	0.0140853	0.732703
ENST00000466171	-0.971674	0.12268	-2.51576	0.0140959	0.732703
ENST00000478198	1.19775	-0.699434	2.51558	0.0141015	0.732703
ENST00000403949	0.877666	1.28016	2.5166	0.0141019	0.732703
ENST00000460339	-0.925513	2.50357	-2.51574	0.0141075	0.732703
ENST00000637081	-0.740641	2.87223	-2.51559	0.01411	0.732703
ENST00000571888	0.974187	-1.57727	2.5151	0.0141192	0.732703
ENST00000527312	-0.759484	2.02641	-2.51488	0.0141271	0.732703
ENST00000571714	-0.954744	1.26373	-2.51474	0.0141323	0.732703
ENST00000601966	1.04654	-0.173225	2.5136	0.0141743	0.733898
ENST00000374624	-0.895604	-1.47771	-2.51315	0.0141909	0.733898
ENST00000327987	-0.481029	4.17937	-2.51313	0.0141917	0.733898
ENST00000590836	-0.456971	5.15453	-2.51296	0.0141978	0.733898
ENST00000434262	0.882737	0.190054	2.51435	0.0142088	0.733898
ENST00000421144	-1.06261	0.64194	-2.51224	0.0142245	0.733898
ENST00000621105	-1.03852	0.769909	-2.51211	0.0142304	0.733898
ENST00000513460	1.12811	-0.770803	2.51212	0.0142398	0.733898
ENST00000590462	0.96356	-1.41813	2.51136	0.0142572	0.733898
ENST00000361624	0.749734	11.3674	2.51132	0.0142586	0.733898
ENST00000644079	-0.502669	4.61906	-2.51035	0.0143098	0.733898
ENST00000166139	1.08071	-1.68743	2.50958	0.0143232	0.733898
ENST00000587645	1.02993	0.664638	2.5096	0.0143242	0.733898
ENST00000408534	-1.06727	-1.26026	-2.5095	0.0143261	0.733898
ENST00000553458	0.451799	4.78277	2.50957	0.0143266	0.733898
ENST00000228463	-1.24543	0.396802	-2.5093	0.0143348	0.733898
ENST00000520458	1.02855	-1.00851	2.50807	0.0143795	0.733898
ENST00000255078	0.44318	3.49886	2.50808	0.0143886	0.733898
ENST00000496105	-1.0434	0.195885	-2.50831	0.0143971	0.733898
ENST00000579528	-0.857445	-0.105665	-2.50767	0.0143971	0.733898
ENST00000308724	1.00776	-0.460297	2.50751	0.0144018	0.733898
ENST00000648548	-0.917671	1.3072	-2.50659	0.0144428	0.733898
ENST00000411841	1.08899	0.494058	2.50637	0.0144434	0.733898
ENST00000592582	-0.318718	5.27142	-2.50609	0.0144537	0.733898
ENST00000440322	1.09945	-0.432708	2.50596	0.0144585	0.733898
ENST00000433770	-0.963939	1.61364	-2.50585	0.0144628	0.733898
ENST00000477616	-1.12397	1.74089	-2.50542	0.0144795	0.733898
ENST00000416219	1.08813	-1.20587	2.50534	0.0144821	0.733898
ENST00000504512	1.24361	1.53502	2.50535	0.0144837	0.733898
ENST00000616609	1.03489	-1.58609	2.50522	0.0144938	0.733898
ENST00000642595	1.74093	0.512872	2.50494	0.0145018	0.733898
ENST00000575514	1.12237	-1.54597	2.50444	0.0145158	0.733898
ENST00000584312	1.09524	1.87046	2.50429	0.0145214	0.733898
ENST00000532338	0.557193	2.2737	2.5045	0.0145243	0.733898
ENST00000419362	-1.00278	-1.80439	-2.50409	0.0145291	0.733898
ENST00000497527	-0.823537	1.67224	-2.50388	0.0145369	0.733898
ENST00000418670	-0.583161	4.00728	-2.50384	0.0145384	0.733898
ENST00000429776	-1.07341	0.259172	-2.50362	0.0145478	0.733898
ENST00000619812	1.25003	-0.85718	2.50344	0.0145536	0.733898
ENST00000512441	1.02628	-0.31568	2.50348	0.014565	0.733898
ENST00000523834	1.03206	-0.952953	2.50424	0.0145674	0.733898
ENST00000607084	-0.930981	1.49221	-2.50274	0.0145845	0.733898
ENST00000430046	0.494228	3.44988	2.50261	0.0145849	0.733898
ENST00000469000	0.895464	0.441109	2.50196	0.0146097	0.734426
ENST00000436321	-1.07101	0.189546	-2.50153	0.0146258	0.734426
ENST00000536144	0.978208	-0.0657011	2.5046	0.0146293	0.734426
ENST00000442445	0.965077	0.642974	2.50143	0.0146353	0.734426
ENST00000425884	-0.949727	0.59373	-2.50074	0.014671	0.73554
ENST00000603392	-1.2274	0.053189	-2.50001	0.0146838	0.73554
ENST00000438795	-1.02815	2.33726	-2.49978	0.0146925	0.73554
ENST00000635860	1.09675	-0.940675	2.50088	0.0147033	0.73554
ENST00000480477	-0.972158	-1.21438	-2.49905	0.0147224	0.73554
ENST00000481883	-0.292276	5.55637	-2.49897	0.0147233	0.73554
ENST00000614492	1.1854	5.736	2.49878	0.0147306	0.73554
ENST00000425936	0.724071	1.96521	2.49839	0.0147455	0.73554
ENST00000455133	1.08624	-0.439557	2.49727	0.0147883	0.73554
ENST00000418561	-0.895029	1.0285	-2.49682	0.0148057	0.73554
ENST00000622787	-1.02374	-0.140281	-2.49667	0.0148115	0.73554
ENST00000582657	-0.909527	0.993483	-2.49624	0.0148277	0.73554
ENST00000462310	-1.05842	-0.0902604	-2.49613	0.014832	0.73554
ENST00000361147	-0.995145	0.173608	-2.49582	0.0148441	0.73554
ENST00000510382	-0.762031	3.38799	-2.49594	0.0148477	0.73554
ENST00000427448	-0.558298	3.65975	-2.49538	0.0148609	0.73554
ENST00000562872	1.13991	1.79042	2.49522	0.0148716	0.73554
ENST00000308748	0.853123	4.99764	2.49476	0.0148847	0.73554
ENST00000409708	0.644709	3.65788	2.49475	0.0148854	0.73554
ENST00000413510	-0.89928	3.94015	-2.4945	0.014895	0.73554
ENST00000480678	0.989425	0.298061	2.49447	0.014896	0.73554
ENST00000480748	-0.505595	3.81059	-2.49437	0.0148998	0.73554
ENST00000339859	0.537254	2.87283	2.49438	0.0149004	0.73554
ENST00000623878	-0.7495	1.6417	-2.49311	0.0149485	0.73554
ENST00000473912	1.07602	-0.612944	2.49306	0.0149504	0.73554
ENST00000583905	-0.674337	2.85893	-2.49302	0.0149518	0.73554
ENST00000431487	0.9097	0.566281	2.49286	0.0149581	0.73554
ENST00000559497	1.12487	-0.688926	2.4927	0.014977	0.73554
ENST00000430281	-1.03222	-0.960648	-2.49317	0.0149849	0.73554
ENST00000549550	0.953052	-1.09768	2.49193	0.0149942	0.73554
ENST00000602216	-0.674876	1.64947	-2.49147	0.015012	0.73554
ENST00000528055	-0.470026	5.08261	-2.49109	0.0150356	0.73554
ENST00000607055	0.571772	3.07525	2.49092	0.0150385	0.73554
ENST00000566190	1.03945	0.974196	2.49008	0.0150662	0.73554
ENST00000544365	0.808062	1.7737	2.49003	0.015072	0.73554
ENST00000522615	-1.12756	-1.38512	-2.48963	0.0150839	0.73554
ENST00000431285	0.94619	0.897956	2.48957	0.0150862	0.73554
ENST00000534522	1.14591	-1.3427	2.48908	0.0151051	0.73554
ENST00000483413	-0.911039	-0.646943	-2.48908	0.0151054	0.73554
ENST00000377142	-0.34989	7.63528	-2.48886	0.0151138	0.73554
ENST00000261858	-0.905285	-0.0600179	-2.48817	0.0151408	0.73554
ENST00000282466	-1.09144	4.21358	-2.48842	0.0151423	0.73554
ENST00000562293	-0.940599	0.00928273	-2.48787	0.0151531	0.73554
ENST00000491212	-0.920148	0.856944	-2.48782	0.0151545	0.73554
ENST00000371569	-0.606971	2.62344	-2.48779	0.0151571	0.73554
ENST00000565709	-0.790429	1.63713	-2.48681	0.0151942	0.73554
ENST00000491934	1.10138	0.383046	2.48787	0.0151961	0.73554
ENST00000537318	0.866693	2.99776	2.48667	0.0151997	0.73554
ENST00000528070	-0.850013	1.88552	-2.48618	0.015219	0.73554
ENST00000446558	-0.954571	-0.417239	-2.48548	0.0152464	0.73554
ENST00000618662	-0.998842	0.893432	-2.48548	0.0152541	0.73554
ENST00000582751	-0.8904	1.01094	-2.48458	0.0152819	0.73554
ENST00000579084	0.982483	-1.23639	2.48627	0.0152909	0.73554
ENST00000552813	-1.10782	-0.611262	-2.48551	0.0152918	0.73554
ENST00000592761	-0.374054	7.18539	-2.48428	0.0152936	0.73554
ENST00000358859	1.7909	2.29892	2.4845	0.0152938	0.73554
ENST00000476805	-0.837045	0.905665	-2.48429	0.0152957	0.73554
ENST00000545484	-1.06767	0.626831	-2.48382	0.015312	0.73554
ENST00000533809	-0.953288	0.358662	-2.48328	0.0153332	0.73554
ENST00000374852	-0.48203	3.03194	-2.48328	0.0153354	0.73554
ENST00000600236	1.07557	-0.826102	2.48554	0.0153396	0.73554
ENST00000231504	-0.444587	4.63651	-2.48277	0.0153654	0.73554
ENST00000499554	-0.99936	-1.17855	-2.4825	0.0153717	0.73554
ENST00000434385	-1.06498	-0.239149	-2.48244	0.0153745	0.73554
ENST00000578327	-1.0467	0.619111	-2.48214	0.0153786	0.73554
ENST00000378962	-1.20015	2.72358	-2.48206	0.015384	0.73554
ENST00000552197	-0.641371	3.72433	-2.48184	0.0153975	0.73554
ENST00000623550	-0.959725	1.58667	-2.48128	0.0154127	0.73554
ENST00000491761	0.822513	3.01509	2.48132	0.0154136	0.73554
ENST00000465154	1.11761	-0.736211	2.48081	0.0154314	0.73554
ENST00000547469	0.794344	1.47516	2.48061	0.0154391	0.73554
ENST00000624065	1.09937	-1.06683	2.48059	0.0154402	0.73554
ENST00000648510	-0.910959	2.01102	-2.48056	0.0154483	0.73554
ENST00000554082	-0.865852	0.749016	-2.47958	0.0154806	0.73554
ENST00000379177	-0.963461	0.353412	-2.47965	0.0154902	0.73554
ENST00000510409	-0.710329	2.40448	-2.47924	0.015494	0.73554
ENST00000537057	1.08821	-0.608932	2.47914	0.0155017	0.73554
ENST00000464123	1.06729	-1.84387	2.48116	0.0155126	0.73554
ENST00000470831	1.08312	-1.81188	2.4845	0.0155144	0.73554
ENST00000624701	-1.21276	1.04105	-2.47852	0.0155229	0.73554
ENST00000573167	1.10928	-0.316154	2.47832	0.0155308	0.73554
ENST00000546960	-1.10391	0.139747	-2.47829	0.015532	0.73554
ENST00000579899	-0.955208	1.189	-2.47823	0.0155345	0.73554
ENST00000534299	-0.981828	0.319467	-2.47827	0.0155531	0.73554
ENST00000638275	-0.94308	1.69532	-2.47774	0.015554	0.73554
ENST00000511682	-1.14119	-0.851011	-2.47768	0.0155566	0.73554
ENST00000564951	0.686024	1.61529	2.47767	0.0155567	0.73554
ENST00000432239	-1.00345	1.76724	-2.47751	0.0155631	0.73554
ENST00000422619	-1.00804	0.3442	-2.47746	0.0155652	0.73554
ENST00000539399	-0.855477	-1.08842	-2.47703	0.0155825	0.73554
ENST00000474919	-1.09657	-0.440942	-2.47693	0.0155865	0.73554
ENST00000391305	-0.806143	6.31627	-2.47688	0.0155887	0.73554
ENST00000639098	-1.05696	-0.26938	-2.47656	0.0156014	0.73554
ENST00000591143	-0.935089	0.559012	-2.47635	0.0156097	0.73554
ENST00000526020	1.02374	-1.64836	2.47625	0.0156138	0.73554
ENST00000457114	0.849998	1.28616	2.47613	0.0156187	0.73554
ENST00000465721	-0.82049	-0.548515	-2.47757	0.015649	0.736169
ENST00000423034	1.02989	-1.78445	2.47605	0.0156585	0.736169
ENST00000608273	0.645007	2.74031	2.47505	0.0156621	0.736169
ENST00000594797	1.00148	-0.617368	2.47479	0.0157173	0.737858
ENST00000523744	-0.559489	3.41739	-2.4737	0.015719	0.737858
ENST00000591296	-0.818647	1.00768	-2.47294	0.0157474	0.737858
ENST00000503405	0.816245	1.39633	2.47309	0.0157477	0.737858
ENST00000451037	-0.958335	1.59724	-2.4729	0.0157491	0.737858
ENST00000367558	-0.907802	5.02575	-2.47252	0.0157777	0.737858
ENST00000303375	-0.871351	1.37639	-2.47195	0.0157973	0.737858
ENST00000354276	-0.71064	2.50089	-2.47171	0.0157974	0.737858
ENST00000600757	-0.634703	3.32966	-2.47182	0.0158003	0.737858
ENST00000515337	-1.20084	-0.381724	-2.47153	0.0158047	0.737858
ENST00000564793	-0.930576	1.57938	-2.47107	0.0158365	0.737858
ENST00000582245	1.50671	4.13302	2.46968	0.0158804	0.737858
ENST00000611536	0.805843	1.57916	2.46971	0.0159068	0.737858
ENST00000554250	-0.979353	0.00251888	-2.46783	0.0159559	0.737858
ENST00000636405	0.695582	1.92718	2.46782	0.0159563	0.737858
ENST00000447975	1.03851	-1.81821	2.46774	0.0159597	0.737858
ENST00000622927	-1.0085	0.650234	-2.46681	0.0159986	0.737858
ENST00000535628	1.0075	-1.47506	2.46671	0.0160021	0.737858
ENST00000432416	0.956339	0.703338	2.46665	0.0160047	0.737858
ENST00000585258	0.618961	2.55278	2.46649	0.0160109	0.737858
ENST00000384792	-0.987849	8.16661	-2.46636	0.0160162	0.737858
ENST00000374291	0.871896	0.935778	2.46636	0.0160163	0.737858
ENST00000429700	-0.660412	3.38486	-2.46634	0.0160173	0.737858
ENST00000256103	-0.349846	6.77989	-2.46628	0.0160196	0.737858
ENST00000423513	-0.622723	2.65103	-2.4664	0.0160208	0.737858
ENST00000296529	1.23896	1.00621	2.46618	0.0160323	0.737858
ENST00000477202	0.82181	1.16251	2.46612	0.0160343	0.737858
ENST00000491449	0.690666	2.03372	2.4659	0.0160355	0.737858
ENST00000507605	-1.09693	-0.0890544	-2.46546	0.0160534	0.737858
ENST00000313433	0.75184	2.0538	2.46526	0.0160714	0.737858
ENST00000393179	-1.02111	-0.461977	-2.4651	0.0160738	0.737858
ENST00000585949	-0.775997	0.774338	-2.46497	0.0161002	0.737858
ENST00000642221	-0.519337	3.49128	-2.46389	0.0161186	0.737858
ENST00000405486	1.05893	0.358664	2.46489	0.0161191	0.737858
ENST00000469346	-1.05194	1.52596	-2.46384	0.0161206	0.737858
ENST00000382353	-1.21631	-0.350372	-2.46392	0.0161212	0.737858
ENST00000398637	-0.389707	6.3092	-2.46389	0.0161307	0.737858
ENST00000507437	-1.21485	1.90778	-2.46348	0.0161353	0.737858
ENST00000322954	0.435836	4.1717	2.46355	0.0161392	0.737858
ENST00000309602	-0.578913	3.08752	-2.46336	0.0161405	0.737858
ENST00000384333	-1.12571	-0.182574	-2.46296	0.0161643	0.737858
ENST00000446636	-0.466041	3.16209	-2.46277	0.0161648	0.737858
ENST00000481014	1.08258	-1.24666	2.4626	0.0161719	0.737858
ENST00000439811	1.0914	-1.55407	2.46235	0.0161825	0.737858
ENST00000402543	0.59642	2.60756	2.46207	0.0161941	0.737858
ENST00000405549	-0.949007	-0.0757666	-2.46202	0.0161958	0.737858
ENST00000424021	-1.0275	-0.471084	-2.46198	0.0161978	0.737858
ENST00000545747	1.07946	-1.55662	2.4616	0.0162136	0.737858
ENST00000361675	0.662904	9.23867	2.4608	0.0162467	0.737858
ENST00000392054	-0.789067	2.48562	-2.46079	0.0162488	0.737858
ENST00000641917	-0.828377	0.284069	-2.46073	0.0162495	0.737858
ENST00000437941	0.986676	-1.58719	2.46055	0.0162573	0.737858
ENST00000505107	-0.694032	1.85825	-2.4607	0.0162602	0.737858
ENST00000589379	1.02839	-1.91438	2.46036	0.0162651	0.737858
ENST00000508564	-1.05797	-0.046778	-2.46027	0.0162688	0.737858
ENST00000540943	-0.576973	3.76528	-2.45998	0.0162812	0.737858
ENST00000520333	-1.07492	-0.939863	-2.46103	0.0162812	0.737858
ENST00000245206	-0.475007	3.6718	-2.46037	0.0162882	0.737858
ENST00000471834	-0.654226	3.30723	-2.46032	0.0162906	0.737858
ENST00000342316	-0.937113	0.0230549	-2.45885	0.0163281	0.738073
ENST00000253031	0.563532	2.46437	2.45855	0.0163408	0.738073
ENST00000647969	-0.933335	-1.19954	-2.45852	0.0163423	0.738073
ENST00000477716	-0.590745	2.26536	-2.45784	0.0163712	0.738073
ENST00000378076	0.681684	4.96122	2.45793	0.0163812	0.738073
ENST00000523511	-0.954954	-0.0542982	-2.45762	0.0163864	0.738073
ENST00000592482	-0.516314	3.59558	-2.45734	0.0163916	0.738073
ENST00000406213	1.38053	1.59627	2.45725	0.0163955	0.738073
ENST00000510701	1.15239	-1.2781	2.4571	0.0164017	0.738073
ENST00000364902	-0.54268	5.11502	-2.45694	0.0164086	0.738073
ENST00000558155	1.04105	-1.73602	2.45676	0.0164161	0.738073
ENST00000373040	-0.798927	2.98748	-2.4564	0.0164315	0.738073
ENST00000582943	-1.1738	0.180632	-2.4562	0.0164403	0.738073
ENST00000617538	1.17533	-1.83874	2.45592	0.0164518	0.738073
ENST00000269834	1.20656	-1.76628	2.45584	0.0164548	0.738073
ENST00000363922	-0.861326	3.58375	-2.45581	0.0164561	0.738073
ENST00000549103	0.949475	-1.22874	2.4555	0.0164691	0.738205
ENST00000563037	1.04623	-1.66195	2.45553	0.0165158	0.739013
ENST00000439468	0.94483	-0.74206	2.45437	0.0165169	0.739013
ENST00000524326	1.0122	-1.57165	2.45865	0.0165173	0.739013
ENST00000564204	-0.630013	2.81122	-2.45335	0.0165785	0.739047
ENST00000393585	-1.13928	-0.691834	-2.45279	0.0165839	0.739047
ENST00000372007	-0.649518	4.12791	-2.45289	0.016585	0.739047
ENST00000429683	-0.934141	-0.0654923	-2.45273	0.0165866	0.739047
ENST00000262715	-0.920433	1.0659	-2.45242	0.0165995	0.739047
ENST00000586022	0.831591	1.04929	2.45242	0.0165996	0.739047
ENST00000646418	-0.485826	3.31089	-2.45211	0.0166128	0.739047
ENST00000560598	0.883767	3.10766	2.45181	0.0166258	0.739047
ENST00000502289	-1.10463	0.753346	-2.4516	0.016638	0.739047
ENST00000417455	-1.04167	0.545146	-2.45143	0.016642	0.739047
ENST00000435315	-1.09377	4.23131	-2.45143	0.0166427	0.739047
ENST00000495575	0.860421	1.68824	2.45128	0.0166483	0.739047
ENST00000566193	0.764778	0.226017	2.45207	0.0166488	0.739047
ENST00000419333	-0.948273	0.384443	-2.45086	0.0166697	0.739527
ENST00000465165	-0.997594	-1.37578	-2.45058	0.0166835	0.73969
ENST00000595232	1.38035	0.391399	2.45191	0.0167213	0.740588
ENST00000482493	-0.804805	0.792211	-2.44995	0.0167239	0.740588
ENST00000264552	0.657389	2.58754	2.44896	0.0167475	0.740915
ENST00000465670	0.525696	3.52503	2.44868	0.0167648	0.740915
ENST00000494606	-0.714922	2.916	-2.4482	0.0167801	0.740915
ENST00000270815	-0.334896	5.7711	-2.4478	0.016797	0.740915
ENST00000483662	1.12621	0.0662204	2.44774	0.0167997	0.740915
ENST00000531297	-0.98936	0.931898	-2.44746	0.0168118	0.740915
ENST00000429658	-1.09747	0.447637	-2.44715	0.0168251	0.740915
ENST00000482286	1.00611	-0.560501	2.44736	0.0168284	0.740915
ENST00000544848	1.07526	-1.48557	2.44694	0.0168341	0.740915
ENST00000571675	-0.997859	-0.496028	-2.44691	0.0168458	0.740915
ENST00000421331	0.846437	1.52332	2.44663	0.0168476	0.740915
ENST00000559597	-0.917458	0.769822	-2.44682	0.0168523	0.740915
ENST00000327979	1.23679	0.618004	2.44565	0.0168897	0.74111
ENST00000649020	1.03998	0.0838043	2.44567	0.0168905	0.74111
ENST00000608648	-0.507955	4.07052	-2.44561	0.0168914	0.74111
ENST00000422212	0.950656	4.62343	2.44553	0.0169029	0.74111
ENST00000607135	1.02903	-1.41621	2.44525	0.0169072	0.74111
ENST00000458892	-0.861773	4.71255	-2.44488	0.0169228	0.741329
ENST00000630830	-0.944469	2.86203	-2.445	0.0169332	0.741329
ENST00000462363	-1.02415	3.57436	-2.44437	0.0169527	0.741329
ENST00000577814	0.824331	1.59453	2.44363	0.0169769	0.741329
ENST00000471308	1.14982	-0.558182	2.44354	0.0169809	0.741329
ENST00000602657	-0.94423	0.280293	-2.44363	0.0169821	0.741329
ENST00000575554	-1.05313	1.05084	-2.44352	0.0169828	0.741329
ENST00000267584	-0.706522	2.90605	-2.44279	0.0170137	0.741587
ENST00000442081	0.731615	1.66583	2.44234	0.0170331	0.741587
ENST00000449714	-0.474719	5.20628	-2.44202	0.017047	0.741587
ENST00000578498	-0.470736	5.79106	-2.44187	0.0170538	0.741587
ENST00000361897	0.907235	0.437865	2.4415	0.0170729	0.741587
ENST00000407266	1.11673	-1.29221	2.44121	0.0170825	0.741587
ENST00000379607	0.484259	4.59394	2.44125	0.0170961	0.741587
ENST00000590311	0.801793	5.08565	2.44084	0.0170987	0.741587
ENST00000470788	-1.03505	0.000490478	-2.44125	0.0171012	0.741587
ENST00000636153	0.910921	-0.389374	2.44052	0.0171126	0.741587
ENST00000454803	-0.955899	-0.640754	-2.4404	0.0171323	0.741587
ENST00000478795	0.818551	0.858428	2.44011	0.0171363	0.741587
ENST00000496720	1.03166	-1.38404	2.44088	0.0171762	0.741587
ENST00000429865	0.7773	1.16417	2.44054	0.0171785	0.741587
ENST00000338957	-0.445099	4.32064	-2.4384	0.0172055	0.741587
ENST00000332272	-0.343324	7.18052	-2.43835	0.017215	0.741587
ENST00000302632	-1.24982	2.87406	-2.43807	0.0172203	0.741587
ENST00000563779	-0.499521	3.39155	-2.43795	0.017225	0.741587
ENST00000584799	-0.784564	1.39994	-2.43793	0.0172284	0.741587
ENST00000487670	0.713137	1.26352	2.43863	0.0172288	0.741587
ENST00000492101	-0.601682	3.89186	-2.43769	0.0172366	0.741587
ENST00000513314	-0.812493	-1.15371	-2.43756	0.0172424	0.741587
ENST00000499131	-0.61707	1.98861	-2.4368	0.0172756	0.741587
ENST00000595006	-0.94972	0.559808	-2.43676	0.0172776	0.741587
ENST00000597421	0.955354	-1.60857	2.43652	0.017288	0.741587
ENST00000593922	1.06329	-0.787029	2.43615	0.0173079	0.741587
ENST00000600059	-0.982621	0.803791	-2.43572	0.0173303	0.741587
ENST00000599096	1.00352	-1.13261	2.43544	0.0173355	0.741587
ENST00000432789	0.480432	3.43639	2.4351	0.0173507	0.741587
ENST00000507271	-0.952601	-0.951967	-2.43451	0.0173769	0.741587
ENST00000426929	-0.800628	1.77983	-2.43443	0.0173805	0.741587
ENST00000629214	-0.820925	1.06471	-2.43442	0.0173813	0.741587
ENST00000548666	-0.645932	2.2529	-2.43433	0.0173861	0.741587
ENST00000502704	-0.386004	3.89577	-2.434	0.0173993	0.741587
ENST00000587412	1.04159	-0.474069	2.43394	0.0174024	0.741587
ENST00000473487	-0.990271	-0.880456	-2.43376	0.0174103	0.741587
ENST00000475109	-0.651082	2.10199	-2.43376	0.0174109	0.741587
ENST00000564607	-1.10773	-1.10742	-2.43366	0.0174147	0.741587
ENST00000384035	1.15153	-0.0191414	2.43362	0.0174164	0.741587
ENST00000465018	-1.04411	-0.901025	-2.43341	0.0174257	0.741587
ENST00000566914	0.769422	1.47607	2.43358	0.0174302	0.741587
ENST00000551316	0.703458	1.55864	2.43319	0.0174354	0.741587
ENST00000397193	-0.523033	3.08878	-2.433	0.0174456	0.741587
ENST00000376371	0.808621	1.14816	2.4328	0.0174529	0.741587
ENST00000587246	-1.04026	0.0238886	-2.43228	0.0174758	0.741587
ENST00000517594	-0.552083	3.79746	-2.43191	0.0174921	0.741587
ENST00000357604	0.796042	2.01549	2.43168	0.0175027	0.741587
ENST00000571644	-1.02643	3.87576	-2.43141	0.0175146	0.741587
ENST00000449034	1.00676	-1.32386	2.43133	0.0175181	0.741587
ENST00000530599	0.951883	0.698282	2.43193	0.0175189	0.741587
ENST00000497596	0.768116	1.44104	2.43079	0.0175423	0.741587
ENST00000562087	-1.28454	1.27219	-2.43059	0.0175515	0.741587
ENST00000362079	0.728274	8.60351	2.43092	0.017557	0.741587
ENST00000285018	-1.01356	1.89257	-2.43034	0.0175623	0.741587
ENST00000569263	1.05201	-1.60605	2.43021	0.0175684	0.741587
ENST00000580873	-1.01325	0.0821862	-2.43056	0.0175698	0.741587
ENST00000606270	0.826515	1.35212	2.43021	0.0175778	0.741587
ENST00000582192	-0.340244	7.69044	-2.42987	0.017586	0.741587
ENST00000441015	-0.971105	0.984522	-2.4296	0.0175954	0.741587
ENST00000415174	-1.1894	0.144486	-2.42952	0.0175994	0.741587
ENST00000557718	-0.859249	1.64765	-2.42946	0.0176046	0.741587
ENST00000289431	0.615632	2.46364	2.42926	0.0176145	0.741587
ENST00000642021	-0.93748	1.68752	-2.42885	0.0176291	0.741771
ENST00000591642	1.15744	-0.648616	2.42863	0.0176391	0.741771
ENST00000558364	0.898227	1.22486	2.42824	0.0176593	0.741888
ENST00000372491	-0.744189	3.28862	-2.42812	0.0176621	0.741888
ENST00000434296	-0.930119	4.23519	-2.42785	0.017676	0.742049
ENST00000494061	-0.480685	3.5209	-2.4272	0.0177032	0.742764
ENST00000315901	-1.01223	-1.3906	-2.42688	0.0177179	0.742956
ENST00000422685	-0.457671	3.74597	-2.42652	0.0177341	0.743214
ENST00000359236	0.339246	4.81422	2.42621	0.0177515	0.743519
ENST00000578662	1.02514	-1.65275	2.42573	0.0177695	0.743615
ENST00000396085	-0.549575	4.15444	-2.42563	0.017774	0.743615
ENST00000524798	0.954704	-0.968852	2.42523	0.0177922	0.743951
ENST00000462134	-1.05968	-0.601341	-2.42493	0.0178057	0.744023
ENST00000418264	1.02437	-1.5361	2.42475	0.0178142	0.744023
ENST00000469150	-0.244894	6.44993	-2.42487	0.0178307	0.744289
ENST00000364285	0.906916	-1.30358	2.42387	0.0178539	0.744833
ENST00000587275	-0.780216	1.72063	-2.42318	0.017885	0.745615
ENST00000462265	0.967043	-0.973153	2.42477	0.0178958	0.745615
ENST00000323060	-0.709954	1.58943	-2.42279	0.017903	0.745615
ENST00000533532	-0.982152	-1.38605	-2.42235	0.0179235	0.746044
ENST00000371623	-0.343148	7.74862	-2.42159	0.0179578	0.746751
ENST00000594089	0.450222	3.13783	2.42105	0.0179823	0.746751
ENST00000434182	-0.496033	3.65909	-2.42089	0.0179894	0.746751
ENST00000491670	-0.566785	3.35996	-2.42107	0.0179905	0.746751
ENST00000374185	-0.859157	0.618985	-2.42089	0.0179913	0.746751
ENST00000367561	0.941385	-0.972188	2.42039	0.0180125	0.74721
ENST00000393381	-0.58193	3.2612	-2.42011	0.0180254	0.747322
ENST00000467440	-0.641019	2.54256	-2.41974	0.0180455	0.747723
ENST00000544478	1.16702	0.0450838	2.41952	0.0180554	0.747723
ENST00000512029	-0.906197	0.973239	-2.41831	0.0181078	0.749467
ENST00000271628	-0.541594	3.80742	-2.41812	0.0181264	0.749631
ENST00000437375	0.730867	1.20375	2.41771	0.0181353	0.749631
ENST00000588822	0.979795	1.02425	2.41751	0.0181447	0.749631
ENST00000371209	0.940531	-1.86924	2.41736	0.0181644	0.749631
ENST00000378961	-1.10527	4.06966	-2.41711	0.0181755	0.749631
ENST00000585471	-0.978786	1.89291	-2.41697	0.0181808	0.749631
ENST00000635801	-0.983368	-0.504721	-2.41662	0.0181856	0.749631
ENST00000465784	1.20155	0.244541	2.41645	0.0181933	0.749631
ENST00000585652	-0.383878	3.88714	-2.41629	0.0182253	0.750119
ENST00000420756	0.602753	2.64967	2.41575	0.0182256	0.750119
ENST00000562615	-0.864972	-0.465843	-2.41584	0.018239	0.750166
ENST00000456902	-0.992551	-0.290402	-2.41509	0.0182565	0.750166
ENST00000484948	-0.660128	1.56614	-2.41505	0.0182686	0.750166
ENST00000463060	1.15817	-1.18688	2.41451	0.0182878	0.750166
ENST00000390884	1.61226	-0.405522	2.41417	0.018299	0.750166
ENST00000286824	0.993531	-0.294249	2.41401	0.0183061	0.750166
ENST00000445707	-0.543549	5.49567	-2.41427	0.0183095	0.750166
ENST00000532995	-1.02028	-1.37667	-2.41384	0.0183143	0.750166
ENST00000527770	1.01111	-2.04271	2.41369	0.0183211	0.750166
ENST00000495768	-0.933963	1.0716	-2.41325	0.0183448	0.750166
ENST00000552428	-0.434799	4.86628	-2.41366	0.0183482	0.750166
ENST00000618852	0.241885	7.52951	2.41309	0.0183493	0.750166
ENST00000507026	-0.880027	0.417056	-2.41263	0.0184005	0.750292
ENST00000363871	-0.877267	2.1858	-2.41188	0.0184053	0.750292
ENST00000493790	1.00263	0.242278	2.41171	0.0184134	0.750292
ENST00000374487	-0.924505	3.07416	-2.41144	0.0184261	0.750292
ENST00000514356	-0.668654	4.67525	-2.41106	0.0184454	0.750292
ENST00000520023	-0.996397	1.32471	-2.41095	0.0184586	0.750292
ENST00000503975	1.01854	-0.3771	2.41035	0.0184769	0.750292
ENST00000299157	-0.798171	1.96291	-2.41032	0.0184783	0.750292
ENST00000382496	-0.412844	6.07646	-2.4108	0.0184799	0.750292
ENST00000459895	-0.999102	0.503399	-2.41013	0.0184872	0.750292
ENST00000551579	-0.853219	-0.776927	-2.41	0.0184934	0.750292
ENST00000530167	0.907685	1.66581	2.41009	0.0184949	0.750292
ENST00000488242	-1.03732	-0.770076	-2.40982	0.0185017	0.750292
ENST00000505926	0.811084	1.78829	2.40947	0.0185195	0.750292
ENST00000598587	-0.937134	0.20387	-2.4093	0.0185262	0.750292
ENST00000506033	0.873436	-1.46109	2.40921	0.0185305	0.750292
ENST00000330133	-0.848048	1.89936	-2.40947	0.0185315	0.750292
ENST00000616257	-0.996543	-0.463557	-2.40899	0.0185407	0.750292
ENST00000565057	0.621506	1.7316	2.40786	0.0185936	0.750292
ENST00000530932	-0.981656	0.770975	-2.40786	0.0185937	0.750292
ENST00000481381	-0.497497	4.46934	-2.40767	0.0186028	0.750292
ENST00000523058	-1.03436	0.913038	-2.40779	0.0186077	0.750292
ENST00000505306	0.956971	-1.52032	2.40735	0.0186179	0.750292
ENST00000473467	0.926793	-1.15576	2.40676	0.0186457	0.750292
ENST00000460235	0.744714	1.07545	2.40669	0.0186489	0.750292
ENST00000542927	1.24886	-0.640667	2.40655	0.0186564	0.750292
ENST00000495053	1.07686	0.279544	2.40638	0.0186635	0.750292
ENST00000542532	-1.02914	-1.10179	-2.40693	0.0186666	0.750292
ENST00000484374	-0.975892	1.05558	-2.40612	0.018676	0.750292
ENST00000474806	0.738653	4.30851	2.40579	0.0186916	0.750292
ENST00000314392	-0.601141	3.40984	-2.40514	0.018722	0.750292
ENST00000370641	1.07017	-1.45221	2.40507	0.0187256	0.750292
ENST00000229708	1.24148	-1.09364	2.40478	0.0187393	0.750292
ENST00000553385	-1.02315	0.415953	-2.40471	0.0187426	0.750292
ENST00000617689	-0.883943	-0.0201204	-2.40463	0.0187463	0.750292
ENST00000494958	0.933257	-0.209906	2.40452	0.0187517	0.750292
ENST00000448408	-0.849038	3.11031	-2.40407	0.0187778	0.750292
ENST00000532032	-0.960684	0.82001	-2.40387	0.018803	0.750292
ENST00000426721	0.440297	5.77163	2.40325	0.018812	0.750292
ENST00000496233	-1.01126	-1.09085	-2.4032	0.0188143	0.750292
ENST00000319104	0.722494	2.38525	2.40371	0.0188436	0.750292
ENST00000480254	-0.789522	2.33533	-2.40247	0.0188519	0.750292
ENST00000478472	0.978561	0.228845	2.4023	0.0188634	0.750292
ENST00000591081	-0.824267	1.06347	-2.40191	0.0188755	0.750292
ENST00000528520	-0.472851	3.90751	-2.40177	0.0188822	0.750292
ENST00000367474	-1.04601	2.15023	-2.4018	0.0188837	0.750292
ENST00000534610	0.51832	3.58109	2.40166	0.0188876	0.750292
ENST00000463860	-0.636512	2.63585	-2.40164	0.0188884	0.750292
ENST00000390930	-0.466791	11.6959	-2.4018	0.0188921	0.750292
ENST00000464987	0.936324	-1.89002	2.40152	0.0188942	0.750292
ENST00000430973	-1.09632	0.153201	-2.40161	0.0189129	0.750292
ENST00000516768	-0.623123	4.89427	-2.40091	0.0189234	0.750292
ENST00000225603	1.31832	-0.194175	2.40078	0.0189297	0.750292
ENST00000578599	-1.07866	-0.717494	-2.4005	0.018943	0.750292
ENST00000417376	-0.860759	1.28074	-2.40035	0.0189499	0.750292
ENST00000485056	-0.830486	1.26039	-2.4004	0.018951	0.750292
ENST00000467739	-0.597733	3.22576	-2.39993	0.0189735	0.750292
ENST00000619059	0.835048	0.0313787	2.40027	0.0189784	0.750292
ENST00000465716	-0.640544	2.38762	-2.39907	0.0190114	0.750292
ENST00000423335	-0.877853	1.67738	-2.39887	0.0190212	0.750292
ENST00000339468	0.351953	5.04936	2.39881	0.0190238	0.750292
ENST00000579228	-0.704012	1.9527	-2.39851	0.0190382	0.750292
ENST00000518335	-0.973681	0.411665	-2.39847	0.0190405	0.750292
ENST00000409004	-0.999133	0.110373	-2.39848	0.0190523	0.750292
ENST00000608770	-0.502621	4.285	-2.39799	0.0190634	0.750292
ENST00000361669	-0.345546	6.22753	-2.39768	0.0190781	0.750292
ENST00000256319	-0.328635	4.9898	-2.39768	0.0190782	0.750292
ENST00000524189	-0.282008	10.338	-2.39762	0.0190813	0.750292
ENST00000556247	-0.638735	2.23182	-2.39739	0.0190924	0.750292
ENST00000371733	0.950641	-0.145174	2.39705	0.0191088	0.750292
ENST00000562831	-0.929155	-0.0738071	-2.39696	0.0191131	0.750292
ENST00000329092	-0.851387	0.762427	-2.39702	0.0191244	0.750292
ENST00000593581	-0.401171	5.69972	-2.39643	0.0191383	0.750292
ENST00000517097	-0.636804	4.26437	-2.39582	0.0191679	0.750292
ENST00000454982	0.913459	-1.40402	2.39552	0.0191827	0.750292
ENST00000568420	0.946062	-0.952668	2.39532	0.0191921	0.750292
ENST00000471532	0.986313	0.837013	2.39491	0.0192121	0.750292
ENST00000588735	1.05934	-1.07178	2.39765	0.0192193	0.750292
ENST00000607089	1.0581	-0.269499	2.39473	0.0192207	0.750292
ENST00000394430	1.12114	-1.14199	2.39437	0.0192382	0.750292
ENST00000558427	-0.838626	1.23974	-2.39426	0.0192602	0.750292
ENST00000562570	1.11612	-0.261693	2.39387	0.0192647	0.750292
ENST00000571311	-0.381409	4.85121	-2.39444	0.0192682	0.750292
ENST00000585132	0.956632	0.119212	2.39336	0.0192875	0.750292
ENST00000436590	1.01442	0.15721	2.39309	0.0193054	0.750292
ENST00000371707	-0.924748	0.935793	-2.39279	0.019315	0.750292
ENST00000522573	-0.927852	1.0146	-2.39331	0.0193154	0.750292
ENST00000621460	-1.02951	-0.89465	-2.39434	0.019317	0.750292
ENST00000598636	0.964507	-1.55802	2.39186	0.0193603	0.750292
ENST00000570785	1.20968	-1.08728	2.39205	0.0193629	0.750292
ENST00000504810	-0.65069	2.49987	-2.392	0.0193711	0.750292
ENST00000493324	0.657328	1.64901	2.39147	0.0193794	0.750292
ENST00000598548	-0.837362	1.22619	-2.39137	0.0193841	0.750292
ENST00000625078	1.12799	3.28612	2.39133	0.0193861	0.750292
ENST00000515202	-0.827447	0.946617	-2.39127	0.0194117	0.750292
ENST00000378075	1.1159	-1.20687	2.39087	0.0194153	0.750292
ENST00000282282	-0.66591	3.20531	-2.39065	0.0194192	0.750292
ENST00000545254	-1.00204	-1.4278	-2.39017	0.0194431	0.750292
ENST00000505445	-0.606686	2.69773	-2.38997	0.0194526	0.750292
ENST00000395679	-0.488689	2.88509	-2.39043	0.0194623	0.750292
ENST00000561235	-0.519725	3.59312	-2.38971	0.0194655	0.750292
ENST00000555205	-0.647032	2.22252	-2.3891	0.0194956	0.750292
ENST00000624057	0.496006	3.59263	2.389	0.0195003	0.750292
ENST00000491911	0.473633	3.64101	2.38897	0.0195019	0.750292
ENST00000538948	-0.824907	1.07341	-2.38854	0.0195228	0.750292
ENST00000471341	-0.956549	0.310254	-2.3884	0.0195299	0.750292
ENST00000519677	0.986164	-0.907923	2.38815	0.0195425	0.750292
ENST00000392288	-0.80234	1.35728	-2.38801	0.0195491	0.750292
ENST00000394642	0.937447	-0.992046	2.38793	0.0195527	0.750292
ENST00000263980	-0.923984	1.85138	-2.38798	0.019566	0.750292
ENST00000340912	0.652028	2.15703	2.38755	0.0195716	0.750292
ENST00000527933	0.976683	-1.46844	2.38755	0.0195717	0.750292
ENST00000610495	-1.00473	1.95489	-2.38752	0.0195728	0.750292
ENST00000525451	0.993258	-1.76765	2.38727	0.0195852	0.750292
ENST00000507607	0.884667	-0.445852	2.38741	0.0195861	0.750292
ENST00000521315	1.03856	-0.488842	2.3872	0.019589	0.750292
ENST00000472048	1.05123	-2.12604	2.38724	0.0195934	0.750292
ENST00000380629	0.375798	5.32139	2.38676	0.019611	0.750292
ENST00000368202	-0.414779	4.64472	-2.38654	0.0196214	0.750292
ENST00000444861	-1.04486	0.78343	-2.38642	0.0196354	0.750292
ENST00000477102	-0.642309	2.30853	-2.38621	0.0196375	0.750292
ENST00000519143	1.01937	-1.12456	2.3862	0.0196383	0.750292
ENST00000357223	0.995109	0.626301	2.38681	0.0196513	0.750292
ENST00000599944	-1.31267	-0.375918	-2.38589	0.0196536	0.750292
ENST00000373333	-0.817426	2.02346	-2.38587	0.0196608	0.750292
ENST00000467568	-0.920945	-0.842335	-2.38593	0.0196696	0.750292
ENST00000641797	-1.18691	0.509657	-2.38567	0.0196846	0.750292
ENST00000481733	1.08724	0.675175	2.38499	0.0196979	0.750292
ENST00000588452	-0.464299	3.88136	-2.38463	0.0197161	0.750292
ENST00000310396	-1.06759	2.28242	-2.38441	0.01973	0.750292
ENST00000487562	0.977701	-0.285369	2.38444	0.019732	0.750292
ENST00000590101	0.894787	-1.86609	2.38423	0.0197358	0.750292
ENST00000477147	-0.909381	-0.879173	-2.38391	0.0197515	0.750292
ENST00000543460	-0.75469	1.52436	-2.38384	0.0197549	0.750292
ENST00000443669	-1.00216	-0.241423	-2.38375	0.0197594	0.750292
ENST00000324607	-0.500271	6.05878	-2.38375	0.0197598	0.750292
ENST00000524192	-0.6205	2.31089	-2.38347	0.0197736	0.750292
ENST00000593548	-1.06473	-0.765842	-2.38388	0.0197776	0.750292
ENST00000504432	0.856348	0.163323	2.383	0.0197991	0.750292
ENST00000251170	-0.308707	10.0983	-2.38219	0.0198371	0.750292
ENST00000328453	0.848346	2.493	2.38254	0.0198527	0.750292
ENST00000622038	-1.01284	0.530793	-2.38192	0.0198538	0.750292
ENST00000615535	0.685369	6.36334	2.38176	0.0198588	0.750292
ENST00000548441	1.17681	-1.01771	2.38161	0.0198663	0.750292
ENST00000405995	0.659626	3.72598	2.38137	0.0198781	0.750292
ENST00000483510	1.00331	-1.29075	2.38096	0.0198988	0.750292
ENST00000578006	-0.944943	1.38456	-2.38092	0.0199006	0.750292
ENST00000591745	-0.855849	2.01477	-2.38087	0.0199029	0.750292
ENST00000496716	0.83255	0.82855	2.38081	0.0199063	0.750292
ENST00000450395	-0.643478	2.34037	-2.38018	0.0199376	0.750292
ENST00000517577	-1.02563	0.613006	-2.38025	0.0199419	0.750292
ENST00000384028	-0.82482	1.53968	-2.37943	0.019975	0.750292
ENST00000521209	-0.666617	2.20266	-2.37939	0.0199825	0.750292
ENST00000549157	1.03207	-0.522876	2.37928	0.0199826	0.750292
ENST00000515860	1.12584	-1.16464	2.38158	0.019987	0.750292
ENST00000589509	1.06699	-1.27527	2.37893	0.0200001	0.750292
ENST00000481160	-0.98182	-1.03089	-2.37888	0.0200029	0.750292
ENST00000609389	-0.948782	1.89507	-2.37881	0.0200065	0.750292
ENST00000465429	-0.37865	5.34467	-2.37869	0.0200122	0.750292
ENST00000573994	1.0562	-1.62371	2.37889	0.0200205	0.750292
ENST00000566023	0.976397	-0.822375	2.37821	0.0200363	0.750292
ENST00000591045	0.875884	0.17598	2.3781	0.0200421	0.750292
ENST00000645439	1.21261	-0.3005	2.37817	0.0200456	0.750292
ENST00000528776	-0.980922	-1.43915	-2.37972	0.0200563	0.750292
ENST00000434072	0.967439	-1.89503	2.38476	0.0200665	0.750292
ENST00000481691	-1.20699	-0.440131	-2.37746	0.0200742	0.750292
ENST00000637626	-1.02621	-0.428917	-2.37745	0.0200749	0.750292
ENST00000542747	-0.559451	3.11065	-2.37772	0.0200769	0.750292
ENST00000366408	0.995066	-0.631336	2.37728	0.0200835	0.750292
ENST00000488797	-0.67945	2.79907	-2.37771	0.0200909	0.750292
ENST00000493642	-0.728237	1.58875	-2.37675	0.02011	0.750292
ENST00000369516	-1.15345	-0.536698	-2.37657	0.0201213	0.750292
ENST00000444210	0.842307	0.763954	2.37649	0.0201233	0.750292
ENST00000565298	0.621825	2.42977	2.37702	0.0201294	0.750292
ENST00000384737	-0.903	5.07747	-2.37561	0.0201674	0.750779
ENST00000582909	-1.03372	0.385671	-2.37539	0.0201789	0.750779
ENST00000424536	0.777242	0.537654	2.37531	0.0201829	0.750779
ENST00000448100	0.968151	-1.87856	2.37512	0.0201923	0.750779
ENST00000567652	1.9906	2.01405	2.3751	0.0201936	0.750779
ENST00000493855	0.896451	-2.01659	2.37575	0.0202201	0.751023
ENST00000591850	1.01608	-1.30538	2.37444	0.0202267	0.751023
ENST00000425402	0.78185	5.3229	2.37431	0.0202353	0.751023
ENST00000488962	-0.789552	0.117807	-2.3742	0.0202578	0.751023
ENST00000369592	-0.703904	2.32078	-2.37377	0.0202607	0.751023
ENST00000511860	-1.06021	-0.426894	-2.37379	0.0202615	0.751023
ENST00000489933	-0.88617	1.90203	-2.37322	0.0202891	0.751361
ENST00000642089	-1.05188	0.115389	-2.37318	0.020291	0.751361
ENST00000623263	-0.940537	0.339309	-2.37281	0.0203133	0.751806
ENST00000539414	0.983003	-0.839239	2.37233	0.0203344	0.751988
ENST00000436143	-0.570164	4.46608	-2.37218	0.0203419	0.751988
ENST00000366333	-0.488568	3.56255	-2.37195	0.0203534	0.751988
ENST00000477558	-1.00286	0.605753	-2.3718	0.0203613	0.751988
ENST00000320211	-0.91311	0.676513	-2.37143	0.0203802	0.751988
ENST00000541704	0.361119	4.65492	2.37098	0.0204094	0.751988
ENST00000638372	-0.380086	5.00415	-2.37084	0.0204197	0.751988
ENST00000315987	0.942757	-1.65951	2.3705	0.0204278	0.751988
ENST00000494257	1.02079	-1.12099	2.37039	0.0204331	0.751988
ENST00000594216	-0.496339	4.40862	-2.37038	0.020434	0.751988
ENST00000633956	-0.387125	5.26595	-2.37027	0.0204392	0.751988
ENST00000563362	-0.878502	0.888593	-2.37024	0.020441	0.751988
ENST00000572973	0.925595	0.548307	2.36926	0.020491	0.752934
[truncated: 71,468 more rows]

## Sheet: C
Transcript analysis of Dopa neurons in BD vs Controls using limma
	logFC	AveExpr	t	P.Value	adj.P.Val
ENST00000610674	1.59843	9.88933	5.13089	3.01658e-06	0.111634
ENST00000430787	-3.48131	1.11974	-5.04779	4.07743e-06	0.111634
ENST00000555972	-2.22279	0.794529	-5.01931	4.44637e-06	0.111634
ENST00000649694	1.04709	4.4498	4.89888	7.11188e-06	0.111634
ENST00000352732	0.799218	7.84137	4.86587	8.04279e-06	0.111634
ENST00000647673	1.12277	4.47834	4.83898	8.66452e-06	0.111634
ENST00000553872	2.08674	0.116254	4.65228	1.741e-05	0.167137
ENST00000647893	1.45729	3.03774	4.6301	1.89301e-05	0.167137
ENST00000457952	1.41318	1.84287	4.62248	1.94586e-05	0.167137
ENST00000267377	1.16311	5.0337	4.54083	2.60563e-05	0.189213
ENST00000573866	1.94978	0.895232	4.52618	2.69242e-05	0.189213
ENST00000418001	-3.36113	0.529717	-4.43874	3.67506e-05	0.21748
ENST00000555989	1.44058	-0.410295	4.43144	3.84214e-05	0.21748
ENST00000538596	1.73043	1.03885	4.41973	3.96926e-05	0.21748
ENST00000365731	1.70027	0.445371	4.3942	4.37616e-05	0.21748
ENST00000452069	2.23496	0.449302	4.38602	4.50129e-05	0.21748
ENST00000385026	1.85137	-1.57543	4.33099	5.43824e-05	0.228876
ENST00000526107	2.01918	-1.33783	4.3147	5.77189e-05	0.228876
ENST00000372524	1.49402	3.45585	4.31464	5.772e-05	0.228876
ENST00000434736	1.75647	-1.04115	4.30781	5.92146e-05	0.228876
ENST00000588382	-2.04579	-0.242019	-4.28244	6.36545e-05	0.234321
ENST00000477280	1.4992	1.98815	4.27347	6.67581e-05	0.234576
ENST00000622628	1.18075	2.85978	4.25107	7.09952e-05	0.238618
ENST00000384010	1.14301	3.39945	4.23475	7.63049e-05	0.245778
ENST00000261024	1.32151	2.77128	4.1928	8.79346e-05	0.271908
ENST00000442636	1.6128	0.0520288	4.13891	0.000104556	0.301855
ENST00000519143	1.69931	0.233433	4.14065	0.000105429	0.301855
ENST00000650079	1.22258	3.18823	4.12433	0.00010991	0.303447
ENST00000552488	-0.894355	3.19704	-4.10255	0.000118409	0.308649
ENST00000565488	1.77836	-0.231457	4.09917	0.00011978	0.308649
ENST00000530336	1.89513	0.814479	4.0925	0.000123993	0.3092
ENST00000560167	1.80288	-0.98416	4.05653	0.000140432	0.339248
ENST00000404537	-1.78315	-0.298467	-4.04004	0.000146462	0.343094
ENST00000512085	1.20474	1.81736	4.00648	0.000166207	0.352412
ENST00000465159	-1.73984	1.2879	-3.99855	0.000168512	0.352412
ENST00000438629	1.85527	-0.89434	3.99526	0.000172494	0.352412
ENST00000422149	1.69258	0.0223335	3.99117	0.000174665	0.352412
ENST00000651182	-3.16238	1.74855	-3.98258	0.000179908	0.352412
ENST00000373235	-1.20219	4.17917	-3.97195	0.000186457	0.352412
ENST00000457339	1.98761	-1.06766	3.95701	0.000196294	0.352412
ENST00000604156	1.42809	0.808632	3.95069	0.000199838	0.352412
ENST00000496424	1.7579	-1.11854	3.94773	0.000199893	0.352412
ENST00000521165	-1.87552	-0.266245	-3.94099	0.000204457	0.352412
ENST00000430165	1.63037	0.318279	3.94219	0.000206241	0.352412
ENST00000568177	0.735424	5.29616	3.92938	0.000212552	0.352412
ENST00000634819	-2.30345	0.531474	-3.92833	0.000214661	0.352412
ENST00000538714	0.790265	4.48846	3.92447	0.000216064	0.352412
ENST00000263955	2.18548	1.86281	3.91691	0.000223335	0.352412
ENST00000465385	1.51513	0.501418	3.91373	0.000226122	0.352412
ENST00000557136	-2.3884	-0.627112	-3.90843	0.000227939	0.352412
ENST00000606653	-2.36804	1.58542	-3.89799	0.000238069	0.354675
ENST00000628146	-1.95599	0.682619	-3.89473	0.000238579	0.354675
ENST00000340067	0.765541	4.23273	3.8879	0.000246997	0.355028
ENST00000525835	1.88022	0.64372	3.8841	0.00024971	0.355028
ENST00000558407	-1.86445	-0.720582	-3.88033	0.000252904	0.355028
ENST00000487016	1.30098	1.81511	3.87212	0.000257187	0.355028
ENST00000219302	1.59102	-1.2497	3.8656	0.000265682	0.360321
ENST00000480473	-2.14716	-0.695287	-3.83845	0.00029067	0.387413
ENST00000296129	1.38501	1.5412	3.82731	0.000301169	0.388899
ENST00000478636	1.95304	0.104506	3.81975	0.000305782	0.388899
ENST00000648842	0.8594	2.69094	3.82179	0.00030723	0.388899
ENST00000521502	1.88125	-0.624892	3.81121	0.000317732	0.388899
ENST00000515932	1.48369	-1.90797	3.80351	0.000322559	0.388899
ENST00000559231	-1.72904	-1.54672	-3.80144	0.000324917	0.388899
ENST00000341197	-1.92589	-0.696964	-3.80203	0.000327001	0.388899
ENST00000602501	1.9461	-0.518693	3.77192	0.000361117	0.401414
ENST00000482259	1.60003	-1.10966	3.77175	0.000361271	0.401414
ENST00000496727	-1.82389	0.373194	-3.76891	0.000361294	0.401414
ENST00000624361	0.483219	6.42107	3.77133	0.000362294	0.401414
ENST00000587451	-2.16465	0.0772951	-3.76977	0.000364023	0.401414
ENST00000591276	-1.42052	0.519132	-3.76485	0.00036868	0.401414
ENST00000439670	0.57726	4.40191	3.74807	0.000390412	0.41742
ENST00000624602	1.20728	1.62213	3.74113	0.000395585	0.41742
ENST00000643779	0.72577	6.27935	3.74134	0.00039958	0.41742
ENST00000523877	1.30515	-0.322674	3.72979	0.000414836	0.425452
ENST00000585057	-1.74853	-0.874642	-3.69769	0.000455503	0.425452
ENST00000492106	1.67305	0.392597	3.69574	0.000462792	0.425452
ENST00000325455	1.86811	1.93694	3.6923	0.000467789	0.425452
ENST00000542763	-1.94614	-1.09812	-3.69058	0.000467879	0.425452
ENST00000468190	1.40799	-1.41433	3.69057	0.000469084	0.425452
ENST00000523561	1.39917	-0.557333	3.69097	0.000469564	0.425452
ENST00000567743	-0.806348	3.21279	-3.68351	0.000476868	0.425452
ENST00000603827	1.76402	1.19685	3.68371	0.000480639	0.425452
ENST00000485966	-1.63066	0.96773	-3.68082	0.000481025	0.425452
ENST00000573553	0.991369	1.89534	3.67876	0.000484238	0.425452
ENST00000281321	-2.61161	-0.0465409	-3.67875	0.000486857	0.425452
ENST00000568072	-1.67423	-0.847836	-3.67457	0.000490831	0.425452
ENST00000477395	-1.63269	-0.323654	-3.66902	0.000499692	0.425452
ENST00000561163	-1.94602	1.40096	-3.66882	0.000504613	0.425452
ENST00000481190	2.1106	0.135746	3.66808	0.000506017	0.425452
ENST00000583336	-1.42982	-1.78167	-3.66032	0.000513902	0.425452
ENST00000569825	-1.23457	1.86102	-3.65994	0.00051452	0.425452
ENST00000464419	-1.6186	-0.704837	-3.65919	0.000518099	0.425452
ENST00000551804	1.37524	0.135043	3.66072	0.000518364	0.425452
ENST00000589447	-1.96656	-1.27823	-3.65318	0.000525832	0.425452
ENST00000651596	1.04054	1.55898	3.65396	0.000529598	0.425452
ENST00000436441	1.34347	0.512516	3.64613	0.000543227	0.425452
ENST00000276055	1.05413	3.19662	3.64445	0.000545443	0.425452
ENST00000605001	-1.80571	-1.4901	-3.64065	0.000547707	0.425452
ENST00000220659	0.658909	3.67673	3.64042	0.000552889	0.425452
ENST00000583094	-1.6052	-1.24552	-3.63397	0.000559291	0.425452
ENST00000641659	-1.7307	-1.96959	-3.63543	0.00056137	0.425452
ENST00000529238	1.75428	-0.983081	3.62585	0.000579123	0.428796
ENST00000502653	1.03141	1.46414	3.62567	0.000579617	0.428796
ENST00000409546	1.10004	1.68944	3.61176	0.000600516	0.428796
ENST00000352460	-1.7693	-0.740662	-3.61186	0.000601006	0.428796
ENST00000380252	-1.67544	-1.62282	-3.61055	0.000604776	0.428796
ENST00000526948	-1.48149	1.84719	-3.6055	0.000614742	0.428796
ENST00000603310	1.46612	-1.24554	3.60136	0.000626675	0.428796
ENST00000529240	1.5742	-0.718208	3.59703	0.000629409	0.428796
ENST00000636161	-1.80242	1.04807	-3.597	0.00062948	0.428796
ENST00000443083	-1.28274	1.18471	-3.59933	0.000629714	0.428796
ENST00000620242	1.04815	1.87375	3.597	0.000633584	0.428796
ENST00000374786	-1.34264	2.47779	-3.59469	0.000639259	0.428796
ENST00000495611	-1.20361	1.54326	-3.59094	0.000641746	0.428796
ENST00000331858	1.50951	1.20888	3.59012	0.000643439	0.428796
ENST00000509114	1.48811	-1.28457	3.58679	0.000650291	0.429659
ENST00000581063	-1.72797	0.66327	-3.58214	0.000659993	0.432374
ENST00000574657	1.78588	-0.878296	3.57518	0.000678095	0.432901
ENST00000383742	-1.7843	-1.77278	-3.57505	0.000678263	0.432901
ENST00000636347	-1.34569	1.78038	-3.57261	0.000680286	0.432901
ENST00000623958	1.51132	0.309284	3.56014	0.00070774	0.432901
ENST00000551248	-1.75692	-0.697577	-3.56025	0.000711211	0.432901
ENST00000636068	-1.68572	-0.796487	-3.55799	0.000713701	0.432901
ENST00000367558	0.944602	5.06298	3.54822	0.00074089	0.432901
ENST00000488284	-1.47362	-0.196532	-3.54351	0.00074601	0.432901
ENST00000319595	1.06389	2.80813	3.54504	0.000748782	0.432901
ENST00000377602	1.21057	4.93362	3.54457	0.000750147	0.432901
ENST00000601941	1.26243	1.57966	3.54136	0.000751108	0.432901
ENST00000648340	1.52932	-1.22875	3.53912	0.000756438	0.432901
ENST00000478664	0.729306	3.36667	3.54084	0.000758021	0.432901
ENST00000461595	1.7231	-1.03368	3.53911	0.000762527	0.432901
ENST00000419373	1.79786	-1.02826	3.53182	0.000774088	0.432901
ENST00000395770	1.53687	-0.425755	3.53449	0.000774342	0.432901
ENST00000595074	-1.71339	-1.21944	-3.53384	0.000774477	0.432901
ENST00000287590	1.16367	2.58308	3.53053	0.000778197	0.432901
ENST00000592754	-1.54217	2.16616	-3.5303	0.000782384	0.432901
ENST00000463203	-1.79629	-1.271	-3.52774	0.000784108	0.432901
ENST00000473602	-1.93126	-1.15817	-3.5277	0.000784201	0.432901
ENST00000343544	-1.69245	-0.823375	-3.52699	0.000785965	0.432901
ENST00000310323	-1.51885	-1.19393	-3.52555	0.000789598	0.432901
ENST00000533658	1.70827	0.0104261	3.52293	0.00080205	0.432979
ENST00000492456	-1.21647	1.12688	-3.51659	0.000818259	0.432979
ENST00000362265	-1.91132	1.09193	-3.51107	0.000833153	0.432979
ENST00000373289	1.55924	-0.532936	3.50522	0.000841729	0.432979
ENST00000625182	-0.730973	4.84417	-3.50636	0.00084446	0.432979
ENST00000548550	-1.60428	-1.15892	-3.5013	0.000852162	0.432979
ENST00000533552	1.27699	0.445089	3.50208	0.000856896	0.432979
ENST00000637891	-1.61232	-1.64906	-3.49949	0.000857585	0.432979
ENST00000534979	0.777467	3.85197	3.4997	0.000862357	0.432979
ENST00000475513	1.30369	1.5975	3.49906	0.000863823	0.432979
ENST00000559408	-1.81968	2.10033	-3.49916	0.000864479	0.432979
ENST00000568729	-1.7086	0.767888	-3.49652	0.000865066	0.432979
ENST00000527139	-1.80164	-0.987718	-3.49565	0.000867412	0.432979
ENST00000410051	-1.7639	2.0614	-3.49788	0.000868153	0.432979
ENST00000646831	0.740072	3.04519	3.49547	0.000875204	0.433697
ENST00000601054	-1.95852	0.43407	-3.48784	0.000890431	0.435458
ENST00000526766	0.52109	5.53933	3.48916	0.000892313	0.435458
ENST00000265109	-2.24319	0.776814	-3.48548	0.000902318	0.435458
ENST00000563037	1.4516	-0.553016	3.48158	0.000906551	0.435458
ENST00000424181	1.57074	0.205628	3.4824	0.000911606	0.435458
ENST00000491025	-1.66587	-1.77349	-3.47618	0.000921987	0.435458
ENST00000317943	-1.5699	0.432105	-3.47675	0.000925403	0.435458
ENST00000531925	-1.6417	-0.889267	-3.47516	0.000929113	0.435458
ENST00000453904	0.764266	3.81536	3.47594	0.000929979	0.435458
ENST00000472266	1.35513	-0.142198	3.47341	0.000937221	0.435458
ENST00000593480	-1.614	-1.28858	-3.46619	0.000951243	0.435458
ENST00000363499	1.56252	-1.64406	3.46351	0.00095923	0.435458
ENST00000525097	1.51812	-1.72628	3.46183	0.000964286	0.435458
ENST00000456967	1.43238	0.871409	3.45644	0.000987134	0.435458
ENST00000454044	-1.39094	7.13533	-3.45155	0.000995707	0.435458
ENST00000599207	-1.24336	1.57381	-3.45304	0.000997732	0.435458
ENST00000490800	1.63558	-1.44438	3.45244	0.000999795	0.435458
ENST00000462465	1.28766	0.755226	3.44935	0.00100255	0.435458
ENST00000479019	-1.66547	2.20593	-3.45166	0.00100261	0.435458
ENST00000587547	0.840424	2.92051	3.45095	0.00100566	0.435458
ENST00000409327	1.62443	0.356248	3.44749	0.00101362	0.435458
ENST00000530930	0.729369	3.41172	3.44619	0.00101937	0.435458
ENST00000622183	0.866382	3.54507	3.44463	0.00102539	0.435458
ENST00000560702	-1.92414	2.64915	-3.44081	0.00103767	0.435458
ENST00000597940	1.58754	-0.854768	3.43824	0.00103781	0.435458
ENST00000615561	1.03654	1.65229	3.43749	0.00104023	0.435458
ENST00000456053	0.763189	2.98071	3.43717	0.00104954	0.435458
ENST00000494293	-1.41848	0.307877	-3.43221	0.00105744	0.435458
ENST00000416089	-1.80516	0.677263	-3.42938	0.00106679	0.435458
ENST00000492148	-1.68032	0.886178	-3.42831	0.00107033	0.435458
ENST00000559509	-1.99147	1.96135	-3.42906	0.00107323	0.435458
ENST00000517910	1.10815	1.41843	3.42536	0.00108737	0.435458
ENST00000500090	-1.70115	-1.3574	-3.42125	0.00109404	0.435458
ENST00000586664	-1.25999	0.146649	-3.41901	0.00110166	0.435458
ENST00000530904	-1.78905	-0.925587	-3.41729	0.00111215	0.435458
ENST00000650146	1.18568	1.58584	3.41757	0.00111496	0.435458
ENST00000430209	-1.57017	-1.44983	-3.41406	0.00111869	0.435458
ENST00000430296	1.04715	2.80977	3.41507	0.00112341	0.435458
ENST00000520400	-1.36159	0.268464	-3.41237	0.00112936	0.435458
ENST00000432176	1.18859	4.1144	3.4117	0.00113555	0.435458
ENST00000542503	1.05693	1.85346	3.41027	0.00113889	0.435458
ENST00000447509	1.39101	-1.54658	3.40806	0.00113966	0.435458
ENST00000521117	1.32392	-1.56134	3.40754	0.00114942	0.435458
ENST00000636933	0.703138	5.07952	3.40782	0.00114954	0.435458
ENST00000574991	1.26767	1.03124	3.40698	0.0011522	0.435458
ENST00000520512	-1.66979	-1.52745	-3.3991	0.00117874	0.435458
ENST00000384476	1.08585	2.58784	3.39727	0.00118662	0.435458
ENST00000511553	1.49201	-0.085115	3.39645	0.00118677	0.435458
ENST00000450251	1.20653	1.9482	3.39587	0.00119179	0.435458
ENST00000480906	0.925041	2.30884	3.3948	0.00119317	0.435458
ENST00000635867	-1.61968	0.0729339	-3.3948	0.00119496	0.435458
ENST00000332772	1.12825	1.2084	3.39113	0.00121008	0.435458
ENST00000364648	1.24673	1.3953	3.3883	0.00121139	0.435458
ENST00000642855	-1.74741	-0.127476	-3.38907	0.0012151	0.435458
ENST00000577760	-1.47045	0.173882	-3.38259	0.00123289	0.435458
ENST00000311534	1.30773	0.125152	3.38399	0.00123675	0.435458
ENST00000568767	1.34303	0.125566	3.38155	0.00123682	0.435458
ENST00000541960	0.830293	2.74968	3.38269	0.00124174	0.435458
ENST00000547380	1.59343	-0.455543	3.3814	0.00124661	0.435458
ENST00000618051	-1.56506	-1.71532	-3.37837	0.00124901	0.435458
ENST00000641211	1.40883	-1.31828	3.37993	0.00125194	0.435458
ENST00000515716	-1.80889	-1.87006	-3.37794	0.00125409	0.435458
ENST00000375741	-0.912948	2.96095	-3.37658	0.00125589	0.435458
ENST00000426595	-1.48766	0.102668	-3.376	0.00125815	0.435458
ENST00000492088	1.47196	3.29465	3.37716	0.00126033	0.435458
ENST00000522794	1.14075	1.91172	3.37511	0.00127009	0.435458
ENST00000372927	1.36189	-0.740756	3.36981	0.00128233	0.435458
ENST00000421413	1.45224	0.222777	3.37057	0.00128907	0.435458
ENST00000652255	1.36825	-1.33263	3.36494	0.00130168	0.435458
ENST00000497626	0.685751	3.4945	3.36346	0.00131678	0.435458
ENST00000465788	-1.82127	-0.278451	-3.36112	0.00131704	0.435458
ENST00000583419	-1.73035	-0.485299	-3.36009	0.00132647	0.435458
ENST00000478696	-0.90006	3.11306	-3.36018	0.00133032	0.435458
ENST00000510890	0.732252	3.40805	3.35766	0.0013311	0.435458
ENST00000442184	-1.85141	-0.854415	-3.35901	0.00133196	0.435458
ENST00000515993	-1.49024	-1.83681	-3.35808	0.00133667	0.435458
ENST00000611489	-1.53954	-1.25029	-3.35426	0.00134505	0.435458
ENST00000423422	-1.60342	-1.54452	-3.35409	0.00134572	0.435458
ENST00000400371	-1.38822	0.931825	-3.35372	0.00134727	0.435458
ENST00000630447	1.72131	1.11336	3.35361	0.00134771	0.435458
ENST00000580031	0.5044	5.19089	3.3559	0.00134818	0.435458
ENST00000424112	1.02176	1.30293	3.35507	0.00134825	0.435458
ENST00000445733	-1.70769	-1.015	-3.3531	0.00134984	0.435458
ENST00000325319	-1.76973	-1.2593	-3.35095	0.00135877	0.435458
ENST00000560636	1.16649	1.49761	3.34803	0.00138075	0.435458
ENST00000372499	1.5198	0.098228	3.34581	0.00138908	0.435458
ENST00000389131	-1.70893	1.93399	-3.34147	0.00139875	0.435458
ENST00000404620	1.22469	2.63306	3.33851	0.00141148	0.435458
ENST00000563601	0.784624	2.85501	3.33924	0.0014169	0.435458
ENST00000300061	-1.82095	-0.91279	-3.33668	0.00141942	0.435458
ENST00000648178	-2.97474	2.29054	-3.3375	0.00142354	0.435458
ENST00000563909	-1.54696	-0.580874	-3.33611	0.00142356	0.435458
ENST00000362135	0.609716	4.34467	3.33783	0.0014246	0.435458
ENST00000624743	-1.82737	-1.53652	-3.33344	0.00143354	0.435458
ENST00000569877	1.06966	4.70557	3.33493	0.00143754	0.435458
ENST00000577278	-1.77991	-1.18542	-3.33207	0.00143952	0.435458
ENST00000546542	-1.493	-1.95763	-3.33067	0.00144571	0.435458
ENST00000408999	-2.10097	4.09887	-3.3328	0.00144667	0.435458
ENST00000442072	-1.51742	-1.642	-3.3273	0.00146553	0.435458
ENST00000505522	0.834515	3.59672	3.32621	0.00147595	0.435458
ENST00000491281	1.65479	0.627092	3.32289	0.00148042	0.435458
ENST00000554725	-2.36666	0.42836	-3.3221	0.00149305	0.435458
ENST00000395784	0.478406	4.80071	3.32207	0.00149468	0.435458
ENST00000508810	0.922402	2.77583	3.31954	0.00149563	0.435458
ENST00000498302	1.12495	-0.572239	3.32149	0.00149762	0.435458
ENST00000384354	0.725075	3.33846	3.32097	0.00149967	0.435458
ENST00000426589	1.56531	-0.591966	3.32014	0.00150328	0.435458
ENST00000538100	-0.897078	4.1182	-3.31768	0.00150416	0.435458
ENST00000618786	0.793909	12.8785	3.31636	0.00151915	0.435458
ENST00000647624	0.871046	2.81962	3.31426	0.00151991	0.435458
ENST00000537194	-1.9136	-1.1162	-3.31272	0.00152702	0.435458
ENST00000493553	-1.50016	-0.102523	-3.31251	0.001528	0.435458
ENST00000550699	-1.60388	0.395808	-3.31224	0.00152927	0.435458
ENST00000605818	-1.59611	-1.45478	-3.31321	0.00153014	0.435458
ENST00000638052	1.2844	0.295001	3.30928	0.00154311	0.435458
ENST00000566847	1.08882	1.97283	3.30786	0.00154977	0.435458
ENST00000551954	-1.7817	0.634066	-3.3063	0.00155717	0.435458
ENST00000646972	-1.54788	-1.4867	-3.30527	0.00156204	0.435458
ENST00000360032	-1.64627	-1.50177	-3.30563	0.00156916	0.435458
ENST00000422481	-1.62514	3.02845	-3.30398	0.00157804	0.435458
ENST00000464278	0.81635	3.4764	3.30274	0.00158437	0.435458
ENST00000549580	-1.21773	0.644174	-3.30207	0.00158662	0.435458
ENST00000505479	-1.27131	0.709617	-3.29975	0.00158844	0.435458
ENST00000535357	0.853686	2.52911	3.30132	0.0015919	0.435458
ENST00000608517	1.0567	1.11914	3.29992	0.00159824	0.435458
ENST00000409789	1.51589	-0.130715	3.29987	0.00159902	0.435458
ENST00000585978	0.849921	2.37032	3.29763	0.00160997	0.435458
ENST00000460132	-1.27775	0.674593	-3.29342	0.00161926	0.435458
ENST00000390511	-1.64183	0.391004	-3.29204	0.00163535	0.435458
ENST00000528137	-1.64936	-1.64089	-3.28896	0.0016413	0.435458
ENST00000476927	1.1277	1.26501	3.28807	0.00164576	0.435458
ENST00000467005	1.58227	-0.68328	3.28912	0.00165147	0.435458
ENST00000540502	-0.955286	4.58889	-3.28615	0.00165536	0.435458
ENST00000389124	-1.52517	1.2214	-3.28702	0.00165996	0.435458
ENST00000467015	-1.62537	-0.877182	-3.28348	0.00166878	0.435458
ENST00000623729	1.05199	3.99367	3.2828	0.00168311	0.435458
ENST00000651374	0.804025	3.00183	3.27974	0.00168778	0.435458
ENST00000534436	0.972119	1.96734	3.28191	0.00168836	0.435458
ENST00000474434	1.47769	-1.48922	3.27926	0.00169022	0.435458
ENST00000587770	-1.77402	-0.918079	-3.27724	0.00170061	0.435458
ENST00000274368	-1.39682	0.16699	-3.27765	0.00170457	0.435458
ENST00000629782	1.32435	-0.554738	3.27854	0.00170555	0.435458
ENST00000429214	0.920367	1.97672	3.27676	0.00171461	0.435458
ENST00000332947	0.661202	5.27862	3.27637	0.00171651	0.435458
ENST00000513875	1.40432	0.222771	3.27411	0.00171679	0.435458
ENST00000377182	1.08982	4.02204	3.27598	0.00171827	0.435458
ENST00000355653	0.724242	5.2029	3.27578	0.00171954	0.435458
ENST00000560497	1.39796	-0.959919	3.27335	0.00172072	0.435458
ENST00000533870	1.66451	2.72202	3.27495	0.00172367	0.435458
ENST00000489224	0.625464	4.09564	3.275	0.00172372	0.435458
ENST00000531997	1.83145	-1.33768	3.27076	0.00173428	0.435813
ENST00000308251	1.44413	1.77095	3.27179	0.0017364	0.435813
ENST00000530372	-1.55387	-1.85696	-3.26689	0.00175466	0.436426
ENST00000598885	-1.01034	2.60181	-3.26843	0.00175535	0.436426
ENST00000435207	1.11761	1.19311	3.26764	0.00176268	0.436426
ENST00000474586	0.614013	4.84068	3.26606	0.00176697	0.436426
ENST00000516201	0.541856	10.9704	3.26506	0.00177656	0.436426
ENST00000488147	-1.03223	4.20482	-3.26307	0.00178435	0.436426
ENST00000336418	0.411739	5.84623	3.26261	0.00178862	0.436426
ENST00000543072	1.39357	-0.574722	3.26188	0.00179254	0.436426
ENST00000505861	-2.17067	0.419197	-3.26068	0.00179505	0.436426
ENST00000217999	-2.70602	2.90712	-3.25751	0.00180503	0.436426
ENST00000385092	1.45724	-1.37332	3.25607	0.00181286	0.436426
ENST00000525311	1.65601	0.0817746	3.25535	0.00181682	0.436426
ENST00000645625	1.29001	0.682997	3.2543	0.00182253	0.436426
ENST00000537909	-1.63159	0.603377	-3.25391	0.00183501	0.436426
ENST00000648510	0.75002	4.60792	3.25184	0.00183612	0.436426
ENST00000525461	-1.56961	0.2703	-3.25159	0.00183747	0.436426
ENST00000301729	-1.49791	1.09467	-3.25103	0.00184059	0.436426
ENST00000562484	1.5628	0.0506335	3.25237	0.00184487	0.436426
ENST00000442116	1.5007	-1.45413	3.24728	0.00187402	0.436426
ENST00000495084	1.57963	-0.9659	3.24275	0.00188702	0.436426
ENST00000536170	-0.960631	3.18765	-3.24396	0.00189064	0.436426
ENST00000592806	1.401	-0.470548	3.24419	0.00189128	0.436426
ENST00000464280	-0.985462	2.10808	-3.24199	0.00189132	0.436426
ENST00000537498	-1.06749	3.83217	-3.24311	0.00189664	0.436426
ENST00000521273	-0.933909	4.03383	-3.24208	0.00190207	0.436426
ENST00000522054	-1.19281	0.735054	-3.23972	0.00190428	0.436426
ENST00000474107	-2.43434	0.690561	-3.24097	0.00190891	0.436426
ENST00000494484	0.452333	4.51559	3.24041	0.00191211	0.436426
ENST00000590040	0.698043	3.12204	3.23927	0.00191904	0.436426
ENST00000555421	-1.43785	-1.48806	-3.23679	0.00193162	0.436426
ENST00000505821	1.43928	-1.10745	3.23651	0.00193547	0.436426
ENST00000373477	-1.56684	-0.625828	-3.23292	0.00194357	0.436426
ENST00000525475	1.45763	0.210419	3.23274	0.00194463	0.436426
ENST00000442352	-1.38394	4.58682	-3.23233	0.00194704	0.436426
ENST00000580257	2.67524	0.69997	3.23356	0.00194754	0.436426
ENST00000474807	-1.69355	0.748259	-3.23159	0.00195135	0.436426
ENST00000478482	1.59198	0.955859	3.23235	0.00195847	0.436426
ENST00000608963	-1.37271	1.69356	-3.2282	0.0019713	0.436426
ENST00000541092	1.12732	0.555128	3.23019	0.00197216	0.436426
ENST00000420204	-1.45817	-1.04236	-3.22624	0.00198292	0.436426
ENST00000477752	1.20714	0.448339	3.22754	0.00198729	0.436426
ENST00000537735	-1.3494	2.1365	-3.22545	0.00198762	0.436426
ENST00000479300	-1.58445	-0.59631	-3.22418	0.00199519	0.436426
ENST00000480488	1.22473	0.252275	3.22623	0.00199553	0.436426
ENST00000521090	-2.08301	0.134044	-3.22494	0.00199891	0.436426
ENST00000511382	1.56908	-0.752366	3.22407	0.00200816	0.436426
ENST00000419061	1.48599	-1.05381	3.22376	0.00200828	0.436426
ENST00000540159	-0.627096	4.0437	-3.22143	0.00201168	0.436426
ENST00000540198	1.1817	0.144026	3.2208	0.00201547	0.436426
ENST00000369553	1.62295	-0.557206	3.21979	0.00202162	0.436489
ENST00000457958	-1.63929	-1.75554	-3.21889	0.00202705	0.436489
ENST00000504475	1.68222	2.41889	3.21683	0.00204388	0.43889
ENST00000435634	0.367749	7.36423	3.21284	0.00206409	0.440779
ENST00000231368	0.450375	7.69623	3.21478	0.00206552	0.440779
ENST00000579267	1.45597	0.475532	3.21285	0.00207587	0.440779
ENST00000422587	-2.65973	0.518266	-3.21085	0.00207642	0.440779
ENST00000375943	-1.53767	-0.921135	-3.20964	0.00208392	0.440779
ENST00000485797	-1.66213	-1.03096	-3.20916	0.00208689	0.440779
ENST00000407977	1.44873	-0.0673067	3.20306	0.00212531	0.44732
ENST00000475909	-1.52848	0.105703	-3.20203	0.00213637	0.44732
ENST00000305798	-1.4942	-1.14272	-3.1977	0.00215956	0.44732
ENST00000416052	0.962307	2.08102	3.19762	0.00216008	0.44732
ENST00000525626	-1.47219	-1.8449	-3.19741	0.00216142	0.44732
ENST00000494924	-1.44248	1.17826	-3.19693	0.00216447	0.44732
ENST00000616690	-1.57208	-0.448812	-3.19632	0.00216845	0.44732
ENST00000489127	-1.71823	-1.58355	-3.19612	0.00217031	0.44732
ENST00000652245	1.46857	-1.10368	3.19777	0.00217254	0.44732
ENST00000373004	1.86703	3.443	3.19669	0.00217755	0.44732
ENST00000381150	1.47035	-0.0819495	3.19586	0.00218524	0.44732
ENST00000464816	1.09962	0.692014	3.19479	0.00219216	0.44732
ENST00000534463	-1.40997	0.310855	-3.19253	0.00219309	0.44732
ENST00000520068	-2.08682	-0.35769	-3.18687	0.00224157	0.45239
ENST00000497584	-1.5166	0.15877	-3.18665	0.00224271	0.45239
ENST00000623232	0.442485	5.12057	3.18401	0.00224943	0.45239
ENST00000512874	-1.11606	1.45378	-3.18347	0.00225301	0.45239
ENST00000462591	0.805633	2.92413	3.18483	0.00225634	0.45239
ENST00000501211	0.531939	7.50473	3.18052	0.00227287	0.45239
ENST00000576225	-1.20528	0.607226	-3.18029	0.00227444	0.45239
ENST00000497273	-1.64709	-0.687201	-3.17868	0.00228793	0.45239
ENST00000424542	-2.0136	1.11094	-3.17733	0.0022945	0.45239
ENST00000450540	-1.52415	0.997067	-3.17674	0.00229853	0.45239
ENST00000219197	1.1733	3.66587	3.17599	0.00231722	0.45239
ENST00000535934	-1.52231	0.627246	-3.17351	0.00232072	0.45239
ENST00000497953	0.785425	2.11331	3.17443	0.00232812	0.45239
ENST00000295522	1.34999	2.07634	3.17349	0.00233529	0.45239
ENST00000618691	0.438053	6.841	3.17161	0.00234661	0.45239
ENST00000225603	-1.61135	-1.07938	-3.16952	0.00235057	0.45239
ENST00000281416	1.24068	-1.5457	3.17053	0.00235182	0.45239
ENST00000570311	-1.12625	2.61692	-3.16649	0.00236951	0.45239
ENST00000359481	-1.44064	-1.78643	-3.16566	0.00237738	0.45239
ENST00000519659	1.02809	-0.776942	3.16478	0.00239594	0.45239
ENST00000601696	-1.40273	-1.02342	-3.16173	0.00240319	0.45239
ENST00000643509	1.47652	-0.0853758	3.16094	0.00240884	0.45239
ENST00000416717	-1.55895	-0.326069	-3.16139	0.00241168	0.45239
ENST00000309865	1.6871	1.99986	3.15954	0.00241884	0.45239
ENST00000477750	-0.936431	5.4958	-3.16028	0.00242163	0.45239
ENST00000297439	-1.70606	-1.15693	-3.15902	0.00242254	0.45239
ENST00000272641	-1.06444	5.26641	-3.16079	0.00242369	0.45239
ENST00000556556	-1.73112	-0.670896	-3.15725	0.00243527	0.45239
ENST00000569391	1.57108	-1.12803	3.15896	0.00243585	0.45239
ENST00000509368	1.43932	2.79597	3.15915	0.00243647	0.45239
ENST00000587416	-1.50022	-0.99776	-3.15583	0.00244553	0.45239
ENST00000565009	0.815904	1.90566	3.15545	0.00246302	0.45239
ENST00000521150	-1.4629	-0.310964	-3.15288	0.00246697	0.45239
ENST00000474046	0.646515	6.23911	3.15471	0.00246857	0.45239
ENST00000509620	0.934207	1.46517	3.15256	0.00246933	0.45239
ENST00000616634	1.25132	-0.283915	3.15305	0.00247683	0.45239
ENST00000389554	-1.76898	-1.27715	-3.1509	0.00248142	0.45239
ENST00000579385	0.931872	2.46176	3.15236	0.00248545	0.45239
ENST00000468316	-0.990231	1.38095	-3.15202	0.00248606	0.45239
ENST00000384702	-1.51182	-1.8145	-3.14995	0.00248846	0.45239
ENST00000410506	1.42276	-1.04568	3.14957	0.00249126	0.45239
ENST00000521608	1.43429	-1.02359	3.15124	0.00249142	0.45239
ENST00000622329	1.41047	-1.35883	3.1481	0.00250209	0.45239
ENST00000259526	1.16709	2.39237	3.14979	0.00250401	0.45239
ENST00000536558	0.680833	2.50965	3.14899	0.00251066	0.45239
ENST00000650956	-1.54903	-1.96026	-3.14674	0.00251214	0.45239
ENST00000331006	0.552562	3.68024	3.14824	0.00251369	0.45239
ENST00000425254	1.38061	-0.538495	3.14556	0.00252093	0.45239
ENST00000483456	1.05426	1.45087	3.14693	0.00252486	0.45239
ENST00000560617	-1.97522	0.362838	-3.14549	0.00252941	0.45239
ENST00000450877	0.64732	3.91658	3.1439	0.00253332	0.45239
ENST00000605337	-1.27332	1.77323	-3.14338	0.00253719	0.45239
ENST00000536889	-1.43985	-1.78919	-3.14491	0.00253851	0.45239
ENST00000571564	-1.5377	-0.373584	-3.14303	0.00253979	0.45239
ENST00000413990	-1.61781	-0.770903	-3.14302	0.0025472	0.45239
ENST00000436857	-1.29363	0.517606	-3.14169	0.0025499	0.45239
ENST00000507678	0.550039	5.14897	3.14292	0.00255595	0.45239
ENST00000597731	-0.701881	5.98574	-3.14197	0.00256062	0.45239
ENST00000622989	0.858971	2.51649	3.14167	0.00256321	0.45239
ENST00000454147	-1.55359	4.15588	-3.13913	0.00258332	0.4549
ENST00000629303	1.15949	0.502326	3.13503	0.00260045	0.455486
ENST00000577287	1.53614	-0.452852	3.13688	0.00260152	0.455486
ENST00000531709	0.511549	6.78653	3.13517	0.00261176	0.455486
ENST00000498907	1.05253	3.23182	3.13419	0.00261454	0.455486
ENST00000622353	-1.3488	-0.947798	-3.13436	0.00261611	0.455486
ENST00000550192	0.677526	2.1985	3.13347	0.00262361	0.455765
ENST00000640464	0.994984	2.08108	3.13211	0.00263837	0.457302
ENST00000563764	-1.4178	-1.79607	-3.12914	0.00264595	0.45759
ENST00000463806	1.30328	0.387988	3.13004	0.00265408	0.457806
ENST00000617480	-1.22905	-0.346357	-3.12747	0.00265905	0.457806
ENST00000603415	0.720347	3.42965	3.1286	0.00266575	0.45794
ENST00000630598	0.795427	2.88053	3.12637	0.0026792	0.459123
ENST00000583565	0.755099	2.17428	3.12423	0.00268451	0.459123
ENST00000400314	-1.56719	-1.65399	-3.12336	0.00269135	0.459276
ENST00000262738	1.42351	1.82232	3.1237	0.00269897	0.459562
ENST00000535487	1.47376	-0.927084	3.12066	0.0027128	0.459595
ENST00000643665	-1.54091	0.335603	-3.12072	0.00272455	0.459595
ENST00000503042	0.634755	4.14341	3.11931	0.00273002	0.459595
ENST00000490033	-1.70158	-1.45892	-3.11789	0.00273648	0.459595
ENST00000494005	-1.37063	-1.79188	-3.11715	0.00274091	0.459595
ENST00000299339	-1.72725	-1.07507	-3.11672	0.00274887	0.459595
ENST00000484608	1.36153	-1.15527	3.11476	0.00276027	0.459595
ENST00000466107	-1.45483	-1.68463	-3.11525	0.00276168	0.459595
ENST00000373313	1.70359	3.22446	3.1145	0.00276232	0.459595
ENST00000490167	1.35776	-0.297644	3.11429	0.00276402	0.459595
ENST00000498188	-1.58248	1.36376	-3.11565	0.00276456	0.459595
ENST00000469761	1.34939	0.85293	3.11462	0.00277302	0.460012
ENST00000570292	-1.29819	0.3656	-3.11149	0.00278688	0.460629
ENST00000567102	-0.8773	4.40878	-3.11082	0.00280848	0.460629
ENST00000615842	0.875024	3.4798	3.11044	0.0028115	0.460629
ENST00000493380	0.466364	5.78221	3.10963	0.00281743	0.460629
ENST00000570002	1.47238	-0.267106	3.10747	0.0028199	0.460629
ENST00000582734	-1.33074	-0.717359	-3.10876	0.00282405	0.460629
ENST00000638083	0.484037	5.59294	3.10852	0.00282414	0.460629
ENST00000489019	-1.42623	-0.570476	-3.10668	0.0028264	0.460629
ENST00000580740	-1.45933	-0.924077	-3.10777	0.00283037	0.460629
ENST00000447875	1.20142	-0.598157	3.10744	0.00283636	0.460634
ENST00000279394	-0.598445	3.94872	-3.10475	0.00284247	0.460659
ENST00000539521	-1.33305	-2.08626	-3.10241	0.00286429	0.462354
ENST00000510214	-1.72934	-0.297368	-3.10207	0.00286489	0.462354
ENST00000652628	-1.72798	0.31992	-3.10183	0.00287887	0.463024
ENST00000495076	-0.685273	4.16464	-3.10015	0.00288102	0.463024
ENST00000472042	1.45278	-1.0426	3.09931	0.00288815	0.463207
ENST00000421423	1.17485	1.06734	3.0963	0.00291367	0.465696
ENST00000532298	-1.62629	-0.286306	-3.09627	0.00291572	0.465696
ENST00000371809	-1.39084	-1.57873	-3.09444	0.00292954	0.466939
ENST00000516740	0.770387	2.22411	3.09509	0.00294046	0.467715
ENST00000564844	0.881078	2.19778	3.09166	0.00295352	0.468016
ENST00000577698	0.746132	3.38371	3.09332	0.00295446	0.468016
ENST00000589645	-1.53164	-0.929457	-3.09	0.00296782	0.468306
ENST00000468174	1.13535	-1.05174	3.09187	0.00296875	0.468306
ENST00000564269	1.20579	1.58788	3.08924	0.00297447	0.468306
ENST00000620791	-0.842387	3.29719	-3.08827	0.00298292	0.468682
ENST00000422700	1.26776	0.334069	3.08501	0.00301142	0.468993
ENST00000543496	1.55936	-0.111057	3.08621	0.00301536	0.468993
ENST00000419746	0.554289	4.69393	3.08632	0.00301623	0.468993
ENST00000584565	-1.13966	1.09053	-3.08403	0.00302001	0.468993
ENST00000421109	-1.95425	0.701521	-3.08497	0.00302601	0.468993
ENST00000590047	-1.51847	-1.44139	-3.08319	0.0030275	0.468993
ENST00000428891	-1.41981	1.70536	-3.08484	0.00302907	0.468993
ENST00000527288	-1.55692	-1.54665	-3.08287	0.00303343	0.468993
ENST00000480558	-1.0109	2.83423	-3.08117	0.00304538	0.4699
ENST00000519906	-1.60739	-1.44701	-3.07946	0.00306172	0.471481
ENST00000469778	-1.49874	-0.721955	-3.07821	0.00307179	0.472091
ENST00000465305	-1.857	0.280323	-3.07869	0.0030833	0.47292
ENST00000634778	0.407984	5.50989	3.0774	0.00309519	0.473286
ENST00000418873	0.868467	3.06893	3.07512	0.00309954	0.473286
ENST00000547870	-1.59289	-0.590383	-3.07462	0.00310406	0.473286
ENST00000470699	1.46218	-1.22606	3.07388	0.00312297	0.475232
ENST00000529535	1.32758	0.479907	3.06851	0.00315979	0.479891
ENST00000544764	-1.26831	0.633584	-3.06492	0.00319291	0.480637
ENST00000579472	1.4146	-1.23254	3.06434	0.00319833	0.480637
ENST00000422138	0.93067	2.43803	3.06563	0.00320372	0.480637
ENST00000509014	-1.00332	1.49915	-3.06338	0.0032073	0.480637
ENST00000635168	-1.55929	2.08315	-3.06446	0.0032118	0.480637
ENST00000436413	-1.93339	0.802182	-3.06157	0.00323834	0.480637
ENST00000479184	1.22141	-0.855614	3.05944	0.00324418	0.480637
ENST00000541674	1.49295	1.63969	3.05875	0.00325071	0.480637
ENST00000477177	-1.37437	-1.75491	-3.05741	0.0032634	0.480637
ENST00000605249	0.389569	7.27428	3.05911	0.00326518	0.480637
ENST00000396543	1.42907	-0.308809	3.05698	0.00326748	0.480637
ENST00000624429	0.832013	4.4995	3.05875	0.00326792	0.480637
ENST00000586185	-1.64668	-0.651211	-3.0579	0.0032683	0.480637
ENST00000588281	-1.53642	-0.690154	-3.05674	0.00326974	0.480637
ENST00000481074	1.15543	0.270954	3.05614	0.00327545	0.480637
ENST00000358047	-1.29682	1.4199	-3.05587	0.00327803	0.480637
ENST00000486833	1.42225	0.880189	3.05749	0.00327868	0.480637
ENST00000470353	0.753623	2.33162	3.05676	0.00328392	0.480637
ENST00000640355	0.453205	5.82126	3.05594	0.00329509	0.480637
ENST00000579767	1.12331	1.38721	3.05268	0.00330846	0.480637
ENST00000617669	1.29027	-0.96316	3.05412	0.00331101	0.480637
ENST00000534221	1.3281	-0.0909573	3.0516	0.00331891	0.480637
ENST00000419245	1.30964	-1.02456	3.05311	0.00332163	0.480637
ENST00000514630	-1.58178	0.32411	-3.05174	0.00332377	0.480637
ENST00000414370	0.829116	1.9934	3.05274	0.00332601	0.480637
ENST00000510566	0.63671	3.02826	3.05188	0.00333442	0.480637
ENST00000607720	-1.51484	-1.33787	-3.05074	0.00333855	0.480637
ENST00000559333	1.29582	0.711392	3.05069	0.00334411	0.480637
ENST00000540868	1.03522	1.82405	3.04635	0.00336981	0.480637
ENST00000532716	1.23457	-1.49558	3.04574	0.00337573	0.480637
ENST00000525294	-1.18412	2.20818	-3.0456	0.00338896	0.480637
ENST00000506435	-1.53356	-1.28285	-3.04351	0.0033976	0.480637
ENST00000358869	1.2588	1.5746	3.04451	0.00339847	0.480637
ENST00000507184	-1.56761	-0.122089	-3.04314	0.00340124	0.480637
ENST00000519180	-1.89945	1.51901	-3.04281	0.00340454	0.480637
ENST00000584441	-1.52184	-0.776181	-3.04198	0.00342355	0.480637
ENST00000587344	0.362148	7.42928	3.04229	0.00342383	0.480637
ENST00000306434	0.409501	8.00934	3.04214	0.00342973	0.480637
ENST00000462749	-1.54586	-0.35759	-3.04052	0.00344145	0.480637
ENST00000573717	-1.62793	-0.32378	-3.03752	0.00345746	0.480637
ENST00000362195	-1.044	1.90754	-3.03697	0.00346253	0.480637
ENST00000264839	0.74334	3.61967	3.03877	0.00346315	0.480637
ENST00000609443	-1.20836	2.46953	-3.03836	0.0034645	0.480637
ENST00000442449	1.21993	2.13903	3.03829	0.0034663	0.480637
ENST00000555006	-2.14662	-0.417545	-3.03666	0.00346869	0.480637
ENST00000329474	-0.803665	4.46452	-3.03798	0.00347006	0.480637
ENST00000375856	0.49905	7.42593	3.03777	0.00347229	0.480637
ENST00000555359	0.714488	2.21181	3.03742	0.0034748	0.480637
ENST00000596180	1.37172	-1.36488	3.03429	0.00348941	0.480637
ENST00000534127	-1.46681	-1.66762	-3.03548	0.00349104	0.480637
ENST00000461889	-1.35758	-0.907037	-3.03342	0.00349823	0.480637
ENST00000618052	-1.41004	-1.76263	-3.03314	0.00350107	0.480637
ENST00000563553	-1.82112	-0.53111	-3.03308	0.00350168	0.480637
ENST00000621230	0.622131	4.05589	3.03272	0.00350532	0.480637
ENST00000344096	0.502443	5.51668	3.03442	0.00350684	0.480637
ENST00000507722	-1.28881	1.65098	-3.03183	0.00351438	0.480637
ENST00000531297	1.59012	-1.13432	3.03272	0.00351969	0.480637
ENST00000529014	0.790083	2.34423	3.03166	0.00352905	0.480637
ENST00000491511	-1.375	-1.26741	-3.02978	0.00353525	0.480637
ENST00000608023	0.273864	10.548	3.02953	0.00353775	0.480637
ENST00000363515	1.25027	-0.921921	3.03075	0.00354408	0.480651
ENST00000589379	-1.76958	0.574314	-3.02966	0.00355335	0.480691
ENST00000569583	1.48516	-1.0147	3.02932	0.00355681	0.480691
ENST00000605292	-1.90254	-0.605911	-3.02688	0.00356493	0.480948
ENST00000632820	1.47038	0.352688	3.0266	0.00358502	0.481809
ENST00000471726	1.11084	1.22167	3.0264	0.00358802	0.481809
ENST00000505325	0.530282	5.05258	3.02452	0.00360672	0.481809
ENST00000614707	-1.62488	-1.32063	-3.02392	0.00361011	0.481809
ENST00000476760	-1.64966	-0.870022	-3.02153	0.00362037	0.481809
ENST00000513785	-1.37715	-0.0463749	-3.02114	0.00362449	0.481809
ENST00000390504	-1.42888	-0.976917	-3.02066	0.00362948	0.481809
ENST00000639345	0.514703	7.14815	3.0219	0.003635	0.481809
ENST00000542675	-1.67357	-0.307665	-3.02109	0.00364083	0.481809
ENST00000559129	-2.00712	0.505295	-3.02036	0.00364686	0.481809
ENST00000380050	-0.843213	4.75054	-3.01984	0.00365346	0.481809
ENST00000423282	1.43007	-1.15121	3.01978	0.00365717	0.481809
ENST00000267460	-0.718346	5.62665	-3.01974	0.00365743	0.481809
ENST00000571870	-1.57635	-0.84381	-3.01612	0.00368371	0.481809
ENST00000418835	1.45896	-0.610548	3.01514	0.00368765	0.481809
ENST00000396671	0.929326	0.911516	3.014	0.00369983	0.481809
ENST00000521124	1.13238	-1.7967	3.01429	0.00371042	0.481809
ENST00000540373	-1.13606	1.08143	-3.0126	0.00371467	0.481809
ENST00000370053	-1.20518	2.26364	-3.01206	0.00372051	0.481809
ENST00000456944	-0.815872	2.64975	-3.0135	0.00372276	0.481809
ENST00000519435	1.41503	1.04537	3.01152	0.00372628	0.481809
ENST00000624360	0.499169	4.89827	3.01234	0.00373654	0.481809
ENST00000480207	1.23984	0.235831	3.0112	0.00374518	0.481809
ENST00000559722	-0.841939	2.04307	-3.01069	0.00375395	0.481809
ENST00000396982	1.49294	-1.1926	3.00889	0.00375462	0.481809
ENST00000611103	1.0713	0.806589	3.00846	0.0037592	0.481809
ENST00000421406	0.932005	4.67995	3.00946	0.00376237	0.481809
ENST00000479865	0.842421	3.56004	3.00945	0.00376713	0.481809
ENST00000563028	-2.68471	1.62961	-3.00842	0.00377164	0.481809
ENST00000506525	-1.0296	2.11671	-3.00824	0.00377247	0.481809
ENST00000586796	0.771322	1.48314	3.009	0.00377304	0.481809
ENST00000564843	-1.38158	-1.56878	-3.00802	0.00377463	0.481809
ENST00000489018	-1.4052	0.835836	-3.00837	0.00377699	0.481809
ENST00000545700	-1.30447	1.2243	-3.00528	0.00379377	0.482077
ENST00000513430	1.1857	0.561799	3.00647	0.00380036	0.482077
ENST00000595833	-1.35842	-1.22823	-3.00464	0.00380072	0.482077
ENST00000239906	0.381734	5.86487	3.00538	0.00380915	0.482077
ENST00000612427	-1.76976	-0.595376	-3.00377	0.00381548	0.482077
ENST00000046794	1.60195	-0.841318	3.00383	0.00382536	0.482077
ENST00000580476	0.819661	10.7072	3.00408	0.00382681	0.482077
ENST00000491805	-1.39843	0.0735858	-3.00328	0.00382898	0.482077
ENST00000484264	-1.41976	-1.28884	-3.00129	0.00384971	0.482527
ENST00000436982	1.25116	-0.761545	2.99974	0.00385456	0.482527
ENST00000554358	-2.04388	-0.148883	-3.00052	0.00385717	0.482527
ENST00000306087	-1.88784	6.46279	-3.00099	0.00385752	0.482527
ENST00000518827	0.815126	2.0205	3.00012	0.00386929	0.483217
ENST00000567306	0.639914	3.43467	2.99928	0.00387557	0.483221
ENST00000417687	-1.95172	-1.294	-2.99702	0.00388484	0.483597
ENST00000472625	-1.63069	0.063349	-2.99668	0.00390005	0.484234
ENST00000560255	0.698248	2.97515	2.99679	0.00390249	0.484234
ENST00000573220	1.17215	0.78051	2.9948	0.00390964	0.484332
ENST00000417443	0.496889	6.62195	2.99553	0.00391702	0.484332
ENST00000498997	-1.44315	-0.397994	-2.99369	0.00392207	0.484332
ENST00000565825	0.665422	3.29526	2.99223	0.0039574	0.486622
ENST00000467095	-1.35296	0.531886	-2.99047	0.00397684	0.486622
ENST00000485617	-0.695832	3.50923	-2.99027	0.00398081	0.486622
ENST00000472681	0.847565	1.84919	2.98825	0.00398366	0.486622
ENST00000585714	0.818562	2.99418	2.98992	0.00398487	0.486622
ENST00000526080	-1.45286	-0.624277	-2.98716	0.0039961	0.486622
ENST00000459825	1.24537	-0.420081	2.98694	0.0039987	0.486622
ENST00000558060	1.26256	0.120164	2.98758	0.00401121	0.486622
ENST00000566703	-1.49083	-0.623423	-2.98553	0.00401484	0.486622
ENST00000415244	-0.980796	2.45138	-2.98501	0.0040208	0.486622
ENST00000567359	-0.613337	4.54419	-2.98673	0.0040208	0.486622
ENST00000244513	-1.4221	-1.8174	-2.98653	0.00402168	0.486622
ENST00000323404	-1.35945	-0.295309	-2.98457	0.00402592	0.486622
ENST00000465667	-1.32224	0.215142	-2.98391	0.00403354	0.486622
ENST00000508573	-1.39929	-1.29986	-2.98312	0.00404373	0.486622
ENST00000480428	0.840333	1.80877	2.98396	0.00405301	0.486622
ENST00000545296	0.926942	1.19053	2.98307	0.00406376	0.486622
ENST00000432648	0.544991	5.16345	2.98295	0.0040642	0.486622
ENST00000522088	1.28036	0.016791	2.98116	0.00406534	0.486622
ENST00000390477	1.28472	-1.73422	2.98224	0.00406651	0.486622
ENST00000339824	-0.604324	6.5935	-2.98158	0.00407902	0.487365
ENST00000523993	-1.4811	-1.46658	-2.9801	0.00408581	0.487422
ENST00000540945	-1.50833	1.0987	-2.97828	0.0040989	0.487847
ENST00000505391	0.690393	3.02247	2.97862	0.0041134	0.487847
ENST00000643147	-1.4412	0.463014	-2.97668	0.00411775	0.487847
ENST00000563478	1.32247	-0.458542	2.97654	0.00411937	0.487847
ENST00000450638	-1.43169	-1.33617	-2.97641	0.00412093	0.487847
ENST00000225916	-0.750669	5.01301	-2.97412	0.00415687	0.491045
ENST00000417559	1.53585	-1.70686	2.97305	0.00416064	0.491045
ENST00000472477	1.32462	-0.968557	2.97242	0.00418621	0.491149
ENST00000577486	-1.20388	0.502918	-2.97058	0.00419013	0.491149
ENST00000435127	1.08189	2.9222	2.96996	0.00419748	0.491149
ENST00000471659	-1.4916	0.488833	-2.96954	0.00420257	0.491149
ENST00000511545	1.40312	-1.09172	2.97113	0.00420354	0.491149
ENST00000510612	1.46607	-0.719854	2.9694	0.00420417	0.491149
ENST00000550206	-1.6324	-0.51594	-2.96925	0.004206	0.491149
ENST00000461115	-0.528566	4.87633	-2.96681	0.00423543	0.493139
ENST00000507705	1.0421	0.917884	2.96842	0.00423705	0.493139
ENST00000435222	-1.35279	0.0985771	-2.96625	0.00424218	0.493139
ENST00000525008	-1.45241	0.33868	-2.96571	0.00424874	0.49316
ENST00000441511	-1.53934	-0.689554	-2.96483	0.00425941	0.493658
ENST00000369306	-1.51218	-0.683328	-2.96483	0.00427109	0.493888
ENST00000248598	1.54659	2.58492	2.96361	0.00427418	0.493888
ENST00000522066	-0.890529	2.45769	-2.96356	0.00429518	0.495574
ENST00000592583	1.23522	-1.05645	2.95944	0.0043253	0.496586
ENST00000650139	0.87941	2.24191	2.95938	0.004326	0.496586
ENST00000540136	-1.46557	0.891949	-2.95931	0.00432682	0.496586
ENST00000357922	-1.38831	1.29669	-2.9599	0.00433678	0.496586
ENST00000551059	1.12115	-0.542929	2.9601	0.00433861	0.496586
ENST00000543037	-1.10647	1.07443	-2.95956	0.0043425	0.496586
ENST00000642268	1.36112	-0.796927	2.95724	0.0043525	0.496747
ENST00000432874	-0.759363	2.48157	-2.95833	0.00435676	0.496747
ENST00000472516	1.25598	0.322389	2.95507	0.00437946	0.497731
ENST00000518272	0.657783	2.38714	2.9554	0.00439684	0.497731
ENST00000264930	1.28443	3.80039	2.95307	0.00441935	0.497731
ENST00000515240	1.08108	0.962431	2.9516	0.00442281	0.497731
ENST00000568112	-1.4293	-1.74733	-2.95196	0.00442292	0.497731
ENST00000492352	-2.10614	-1.48941	-2.95134	0.00442604	0.497731
ENST00000443800	-0.97808	2.17738	-2.9508	0.00443287	0.497731
ENST00000623230	1.35168	2.19315	2.95028	0.00445785	0.497731
ENST00000556436	-1.33828	-0.487077	-2.9486	0.00446073	0.497731
ENST00000330597	-1.32244	-1.90551	-2.94761	0.00447327	0.497731
ENST00000534102	-1.44878	-1.02544	-2.94786	0.00448337	0.497731
ENST00000450009	-1.69168	-1.7753	-2.94667	0.00448524	0.497731
ENST00000355797	0.505604	5.42722	2.94833	0.00448547	0.497731
ENST00000516600	-1.46673	-0.869495	-2.94466	0.0045109	0.497731
ENST00000449034	-1.42286	-1.56627	-2.94393	0.00452331	0.497731
ENST00000544969	1.22772	0.378871	2.9444	0.00453571	0.497731
ENST00000408460	-1.45899	-1.34479	-2.94267	0.00453647	0.497731
ENST00000554246	-1.22433	0.855748	-2.94405	0.00453788	0.497731
ENST00000559095	1.42294	-0.947869	2.94236	0.00454041	0.497731
ENST00000327026	-0.574966	7.50668	-2.94303	0.00454818	0.497731
ENST00000474223	0.908273	5.0561	2.94246	0.00455735	0.497731
ENST00000592841	-1.13255	-0.167342	-2.94204	0.00456112	0.497731
ENST00000419247	-1.2268	1.06171	-2.94062	0.00456283	0.497731
ENST00000600321	1.23572	0.126787	2.93986	0.00457275	0.497731
ENST00000395530	0.391327	6.43633	2.94134	0.00457425	0.497731
ENST00000479458	-1.09801	1.21589	-2.94114	0.00457544	0.497731
ENST00000579824	1.27546	-0.986816	2.94111	0.00457594	0.497731
ENST00000569752	1.3612	0.5118	2.93917	0.0045817	0.497731
ENST00000528495	-1.44802	-1.27583	-2.93902	0.00458368	0.497731
ENST00000545526	-1.44453	-0.252453	-2.93901	0.00458377	0.497731
ENST00000490375	0.971656	1.82884	2.93877	0.00458685	0.497731
ENST00000287675	0.446211	4.50539	2.93853	0.00459004	0.497731
ENST00000475364	-0.64968	3.92358	-2.9399	0.00459343	0.497731
ENST00000561881	0.950252	4.78989	2.93955	0.00459641	0.497731
ENST00000623717	-0.893368	4.67525	-2.93918	0.00460055	0.497731
ENST00000567598	0.599026	4.66499	2.93721	0.00460726	0.497731
ENST00000365097	-1.46842	-1.26011	-2.93676	0.00461372	0.497731
ENST00000426023	1.16799	0.184136	2.93814	0.00461666	0.497731
ENST00000417355	-1.52375	-0.691687	-2.9364	0.00461779	0.497731
ENST00000492191	-1.30291	-1.11513	-2.93601	0.00462292	0.497731
ENST00000383800	-1.15931	0.97288	-2.93571	0.00464812	0.499747
ENST00000468198	0.785699	3.85979	2.93343	0.00465687	0.499992
ENST00000492689	1.38506	-1.10745	2.93163	0.00468059	0.501596
ENST00000558894	-1.62676	-0.448744	-2.9323	0.00469134	0.501596
ENST00000340650	0.568908	3.35096	2.93191	0.00469762	0.501596
ENST00000394945	-1.72387	1.18337	-2.93078	0.00470213	0.501596
ENST00000493989	-1.77497	-0.0741673	-2.92942	0.00470992	0.501596
ENST00000199940	-0.47261	4.48681	-2.92872	0.00471936	0.501596
ENST00000492150	-0.795481	3.73052	-2.92883	0.00473296	0.501596
ENST00000584952	0.523441	4.25508	2.9275	0.00473563	0.501596
ENST00000509165	1.30815	-0.885615	2.92646	0.00474958	0.501596
ENST00000578916	-1.44453	0.644931	-2.92777	0.0047507	0.501596
ENST00000646875	1.20856	-0.787089	2.92633	0.00475135	0.501596
ENST00000509849	-1.38984	-1.4543	-2.92607	0.00475676	0.501596
ENST00000561402	-1.78139	0.505868	-2.92692	0.00475961	0.501596
ENST00000394974	0.988331	2.20767	2.92708	0.00476264	0.501596
ENST00000499948	1.27759	0.179986	2.92633	0.00477131	0.501714
ENST00000536795	-1.13329	1.61745	-2.92524	0.00478578	0.501714
ENST00000426156	1.21103	-0.214391	2.92512	0.00479002	0.501714
ENST00000506566	1.50323	-0.843987	2.92342	0.00479053	0.501714
ENST00000418295	-1.50082	-1.62414	-2.92408	0.00479622	0.501714
ENST00000577637	-0.904101	3.21992	-2.92214	0.0048079	0.502257
ENST00000463276	1.15728	-0.0471968	2.92159	0.00483843	0.504764
ENST00000563205	0.817744	2.7328	2.91907	0.00486613	0.506867
ENST00000313084	-1.36738	1.01346	-2.91865	0.0048717	0.506867
ENST00000488851	0.65057	2.37471	2.91737	0.0048953	0.508062
ENST00000440196	-1.43001	-1.47869	-2.91534	0.00491022	0.508062
ENST00000436386	-1.18898	-0.959904	-2.91566	0.00491542	0.508062
ENST00000465077	-2.05986	2.99494	-2.91408	0.00491852	0.508062
ENST00000410411	0.888203	1.89465	2.9156	0.00492001	0.508062
ENST00000460256	0.765303	2.0443	2.91449	0.00493544	0.508062
ENST00000651231	-1.35405	-0.2371	-2.91312	0.00494354	0.508062
ENST00000618844	1.01045	1.30795	2.91227	0.00494367	0.508062
ENST00000483887	-1.47591	-0.79939	-2.91191	0.0049487	0.508062
ENST00000505800	1.34062	-1.2772	2.91035	0.00497057	0.508062
ENST00000466604	0.903226	1.96734	2.91189	0.00497123	0.508062
ENST00000440126	0.737163	2.87767	2.91111	0.00498317	0.508062
ENST00000489905	-1.64976	-0.626594	-2.90677	0.00502098	0.508062
ENST00000606214	-1.35375	1.53087	-2.90635	0.00502696	0.508062
ENST00000432054	0.434449	4.44574	2.90571	0.00503594	0.508062
ENST00000603538	1.26375	0.528434	2.90728	0.00503604	0.508062
ENST00000612219	-1.50579	0.605896	-2.9051	0.00504461	0.508062
ENST00000524460	1.24089	-0.148	2.90478	0.00504911	0.508062
ENST00000487988	-1.46045	0.0305289	-2.90523	0.00504998	0.508062
ENST00000515332	1.25994	0.634602	2.90425	0.00505666	0.508062
ENST00000474089	-1.47883	-0.212211	-2.90401	0.00506161	0.508062
ENST00000532159	-1.08785	1.5835	-2.90513	0.00506759	0.508062
ENST00000471265	-1.34215	0.235678	-2.90329	0.00507041	0.508062
ENST00000364102	1.4085	-1.13693	2.90304	0.00507391	0.508062
ENST00000540191	-1.53504	-0.969126	-2.90287	0.00507642	0.508062
ENST00000443839	-1.67113	-0.34422	-2.90304	0.00507714	0.508062
ENST00000586926	-1.56658	0.980172	-2.90297	0.00508836	0.508062
ENST00000318160	-1.21887	6.6524	-2.90331	0.00509066	0.508062
ENST00000565251	-1.50966	0.155164	-2.90193	0.00509813	0.508062
ENST00000592862	-1.47589	-0.916925	-2.89953	0.00512424	0.508062
ENST00000509801	-1.14702	2.07647	-2.8995	0.00512479	0.508062
ENST00000538373	0.712225	2.66224	2.90105	0.00512579	0.508062
ENST00000368614	0.632242	3.16687	2.89932	0.0051273	0.508062
ENST00000216117	1.70668	0.446859	2.89979	0.00514191	0.508062
ENST00000564819	-1.1251	2.06298	-2.89809	0.00514506	0.508062
ENST00000478772	-1.86673	4.73769	-2.89932	0.00514878	0.508062
ENST00000368817	-1.43629	-1.78034	-2.89815	0.00515177	0.508062
ENST00000402410	-1.31678	-0.622244	-2.89731	0.00515633	0.508062
ENST00000522507	0.664819	2.22011	2.89889	0.00515639	0.508062
ENST00000578040	1.1534	0.989081	2.89714	0.00515887	0.508062
ENST00000584798	0.713109	3.35204	2.89682	0.00516343	0.508062
ENST00000577988	1.45752	1.97418	2.89746	0.00517673	0.508062
ENST00000348544	0.826765	1.52357	2.89595	0.00519812	0.508062
ENST00000449444	0.455911	6.01138	2.89586	0.00520049	0.508062
ENST00000524650	1.34207	-1.80824	2.89416	0.00520215	0.508062
ENST00000586826	-1.4241	-1.27892	-2.89385	0.00520676	0.508062
ENST00000560633	1.10039	-1.16982	2.89528	0.00520677	0.508062
ENST00000382152	-1.55673	-1.28213	-2.89466	0.0052093	0.508062
ENST00000501122	0.912793	12.8238	2.8949	0.00521131	0.508062
ENST00000631770	0.984809	1.90025	2.8949	0.0052118	0.508062
ENST00000530237	-1.27158	0.477773	-2.89274	0.005223	0.508512
ENST00000583677	-1.36261	-0.399336	-2.89059	0.00525465	0.509749
ENST00000425981	-1.50515	-1.70696	-2.89107	0.00525935	0.509749
ENST00000457255	1.23755	0.221504	2.89139	0.00525946	0.509749
ENST00000426077	0.473806	5.59694	2.89036	0.00528101	0.509749
ENST00000415655	-1.25442	-1.6846	-2.88987	0.00528464	0.509749
ENST00000550482	-0.899799	2.75737	-2.88834	0.00528784	0.509749
ENST00000473067	1.17527	-0.624802	2.88955	0.00529067	0.509749
ENST00000620605	1.20678	0.369977	2.8879	0.00529439	0.509749
ENST00000566333	-1.44434	0.192329	-2.88786	0.00529505	0.509749
ENST00000609749	1.37492	0.458064	2.88778	0.00530687	0.509867
ENST00000514582	-1.81667	-0.791562	-2.88811	0.00530947	0.509867
ENST00000510181	-1.0231	0.467869	-2.88556	0.00532928	0.511135
ENST00000522573	1.34648	-0.157254	2.88641	0.00534076	0.511233
ENST00000356239	-1.47771	-1.32384	-2.88453	0.00534468	0.511233
ENST00000476929	1.12181	1.9031	2.88464	0.00536645	0.511233
ENST00000471131	-1.34864	-1.07469	-2.88307	0.0053666	0.511233
ENST00000452430	1.26645	-1.70954	2.88286	0.00536979	0.511233
ENST00000476967	0.708153	2.03608	2.88406	0.00536998	0.511233
ENST00000511897	-1.45262	-0.310257	-2.88171	0.00538709	0.511808
ENST00000432901	-0.666425	3.5692	-2.88305	0.00538927	0.511808
ENST00000382405	1.0817	1.05348	2.88084	0.00540023	0.512142
ENST00000315691	0.826907	1.85035	2.88185	0.00540636	0.512142
ENST00000532392	0.788412	2.42191	2.88002	0.00541265	0.512142
ENST00000564696	0.642823	1.96183	2.8791	0.00542657	0.512582
ENST00000482406	1.42671	-0.385993	2.87924	0.00543944	0.512582
ENST00000259939	1.50468	4.63944	2.87955	0.00544105	0.512582
ENST00000391694	-1.51471	-0.205965	-2.87804	0.00544383	0.512582
ENST00000530682	1.05224	1.25513	2.87778	0.00546794	0.514
ENST00000467136	0.464642	5.20618	2.87768	0.00547218	0.514
ENST00000520771	-1.37672	1.06669	-2.87341	0.00551368	0.517269
ENST00000392054	0.816666	3.38154	2.87304	0.00554262	0.519353
ENST00000504219	-1.10301	1.44149	-2.87251	0.00555137	0.519468
ENST00000579253	-1.37092	0.822044	-2.87038	0.00556058	0.519468
ENST00000586976	1.11218	-1.26669	2.87016	0.005564	0.519468
ENST00000553596	0.668306	3.72038	2.86903	0.00558156	0.520479
ENST00000488067	0.929074	3.32188	2.86995	0.00558877	0.520523
ENST00000412558	-1.4719	-0.41623	-2.86774	0.00560174	0.520591
ENST00000615516	-1.54174	1.44524	-2.86826	0.00561044	0.520591
ENST00000469641	-0.871015	2.58244	-2.86619	0.00562604	0.520591
ENST00000555946	-1.60504	-1.34987	-2.86621	0.00563334	0.520591
ENST00000636691	0.651383	3.42183	2.86691	0.00563949	0.520591
ENST00000503104	1.23515	-0.168085	2.86657	0.00564444	0.520591
ENST00000364946	-1.65633	-1.26607	-2.86612	0.00564527	0.520591
ENST00000525903	-1.41995	-1.57178	-2.86441	0.00565416	0.520591
ENST00000507419	0.711207	2.75111	2.86372	0.00566495	0.520591
ENST00000651660	0.616872	6.15987	2.86408	0.00568271	0.520591
ENST00000597458	0.461501	5.30993	2.86243	0.00568539	0.520591
ENST00000507424	0.603537	4.51123	2.86202	0.00569196	0.520591
ENST00000412878	0.642291	3.14324	2.86313	0.00569966	0.520591
ENST00000424698	-1.77637	-1.00153	-2.86242	0.0057008	0.520591
ENST00000520026	1.46981	0.57581	2.86293	0.00570181	0.520591
ENST00000512155	-1.77229	-1.39385	-2.86132	0.00570301	0.520591
ENST00000483619	0.633684	2.72581	2.86126	0.00570399	0.520591
ENST00000519921	-0.834157	1.92277	-2.85959	0.00573057	0.521917
ENST00000569554	-1.23596	2.12642	-2.8595	0.00573201	0.521917
ENST00000359062	-1.20428	5.49671	-2.86007	0.00574656	0.522551
ENST00000509589	1.27296	-0.960582	2.85887	0.00575708	0.522551
ENST00000264220	1.16315	-0.433304	2.85765	0.00576166	0.522551
ENST00000484546	-1.025	1.8929	-2.85738	0.00576601	0.522551
ENST00000447683	-0.861321	2.47435	-2.85653	0.00579977	0.523769
ENST00000545259	-1.31066	-1.77716	-2.85501	0.00580432	0.523769
ENST00000577705	1.11274	0.984764	2.85564	0.00581554	0.523769
ENST00000383861	1.22691	5.31326	2.85577	0.0058156	0.523769
ENST00000554554	-1.41358	0.513566	-2.85425	0.00582368	0.523769
ENST00000441808	1.08958	1.14065	2.85506	0.00582809	0.523769
ENST00000340391	-1.29512	2.60492	-2.85428	0.00583259	0.523769
ENST00000633710	1.28345	-0.568616	2.8545	0.00583568	0.523769
ENST00000514613	-1.35038	-1.23803	-2.85153	0.00586071	0.523769
ENST00000479523	-1.48647	-0.467114	-2.85205	0.00586427	0.523769
ENST00000538356	-1.57525	-0.540681	-2.85178	0.00586817	0.523769
ENST00000420768	-1.58298	-1.61372	-2.85146	0.00587492	0.523769
ENST00000588131	0.807849	2.82053	2.85004	0.00588515	0.523769
ENST00000519174	-0.620096	3.6351	-2.85052	0.00589351	0.523769
ENST00000329492	-0.670931	5.0573	-2.84949	0.00589406	0.523769
ENST00000520882	-1.20076	-1.80565	-2.85044	0.00589606	0.523769
ENST00000466023	0.728493	2.08927	2.85043	0.00590364	0.523769
ENST00000560503	-1.3478	-1.61189	-2.84882	0.00590519	0.523769
ENST00000628413	-1.07676	3.32165	-2.85004	0.00590818	0.523769
ENST00000562811	0.775728	3.42221	2.84923	0.00592246	0.524433
ENST00000644939	-0.879501	5.16906	-2.84759	0.00594988	0.526258
ENST00000594208	1.0939	0.43773	2.84612	0.00597539	0.526871
ENST00000615573	-1.14805	-1.32094	-2.84397	0.00599267	0.526871
ENST00000471903	-1.37299	-2.05008	-2.84333	0.00599597	0.526871
ENST00000491235	-1.22231	1.22241	-2.84303	0.00600429	0.526871
ENST00000552294	-0.903855	2.57418	-2.84385	0.00600706	0.526871
ENST00000635775	0.612373	5.68112	2.84265	0.00600723	0.526871
ENST00000401880	-1.62867	-0.222859	-2.8426	0.00600808	0.526871
ENST00000624514	-1.50554	-1.41588	-2.84241	0.00601133	0.526871
ENST00000468708	-0.724959	2.43658	-2.84126	0.00603051	0.527953
ENST00000460238	1.61662	-0.825255	2.84194	0.00603897	0.528049
ENST00000618345	1.03233	-1.4023	2.84009	0.00605019	0.528049
ENST00000578918	1.16906	0.263575	2.83974	0.00605608	0.528049
ENST00000555594	1.40061	-0.969363	2.84	0.00607259	0.528049
ENST00000642092	-1.53456	-0.512546	-2.83888	0.00607295	0.528049
ENST00000460873	1.15472	2.12964	2.83993	0.00607648	0.528049
ENST00000460952	-1.28583	-1.47444	-2.83835	0.00607943	0.528049
ENST00000462527	-1.07358	0.304269	-2.83779	0.00611142	0.530095
ENST00000289707	1.51847	-0.516068	2.83678	0.00612371	0.530095
ENST00000603888	-1.66424	-0.352288	-2.83559	0.00612614	0.530095
ENST00000511657	-1.3556	-1.65132	-2.83538	0.0061496	0.530095
ENST00000253814	-0.598294	4.29295	-2.83416	0.00615045	0.530095
ENST00000498497	0.524679	6.29222	2.83548	0.00615401	0.530095
ENST00000380503	-1.44676	-1.12024	-2.83383	0.00615607	0.530095
ENST00000651871	-1.61848	0.801572	-2.83497	0.00615995	0.530095
ENST00000473348	-0.719259	4.0103	-2.83206	0.00618644	0.530095
ENST00000439823	1.32845	-0.752356	2.8308	0.00620812	0.530095
ENST00000556073	-1.08237	2.02473	-2.83078	0.0062084	0.530095
ENST00000569478	-1.28276	-2.04028	-2.83032	0.00621633	0.530095
ENST00000482518	0.742764	3.48571	2.83009	0.00622024	0.530095
ENST00000587365	-1.43759	-0.455601	-2.82964	0.0062281	0.530095
ENST00000540906	-0.693403	6.66707	-2.83068	0.00623361	0.530095
ENST00000651403	-1.67413	0.112675	-2.82911	0.00623723	0.530095
ENST00000482208	1.21642	0.161787	2.82871	0.00624414	0.530095
ENST00000425986	-1.52372	-1.44602	-2.82861	0.00624585	0.530095
ENST00000594579	1.11773	0.303305	2.82842	0.00624912	0.530095
ENST00000288135	-1.89017	5.71412	-2.82946	0.00625474	0.530095
ENST00000432178	1.18176	-1.26687	2.82907	0.00625798	0.530095
ENST00000604213	-0.672334	3.91786	-2.82914	0.00625912	0.530095
ENST00000586220	1.25347	-0.22283	2.82731	0.00626837	0.530095
ENST00000583390	1.25777	-0.857454	2.82626	0.00628665	0.530095
ENST00000650147	1.08385	0.910932	2.8276	0.0062884	0.530095
ENST00000492720	0.863377	1.80124	2.82724	0.00629347	0.530095
ENST00000398534	-1.15816	1.49551	-2.82659	0.00630286	0.530095
ENST00000626782	0.391439	4.85045	2.82665	0.00630459	0.530095
ENST00000585477	-1.37723	-1.63762	-2.82588	0.00630789	0.530095
ENST00000335616	-1.27218	-1.71879	-2.82453	0.00633919	0.530095
ENST00000428741	-0.705485	2.61904	-2.82295	0.00634438	0.530095
ENST00000569673	0.540195	6.68474	2.82288	0.00634577	0.530095
ENST00000475439	1.35	-0.943688	2.82368	0.00635449	0.530095
ENST00000373032	-1.51715	-0.862217	-2.82211	0.00635917	0.530095
ENST00000618127	0.822505	1.95441	2.82203	0.00636054	0.530095
ENST00000639787	-0.7899	2.2806	-2.82191	0.00636265	0.530095
ENST00000564875	1.23213	-0.611534	2.82235	0.0063802	0.530095
ENST00000381980	1.19746	-0.123149	2.82233	0.00638189	0.530095
ENST00000377693	-1.4152	-1.65813	-2.82057	0.0063864	0.530095
ENST00000649711	1.02494	1.76804	2.82048	0.00638787	0.530095
ENST00000288050	0.575314	4.76946	2.82042	0.006389	0.530095
ENST00000592960	1.31439	-0.678924	2.82076	0.00640074	0.530095
ENST00000299847	1.14429	-0.00482741	2.8205	0.00641435	0.530095
ENST00000463802	-1.39301	-1.63147	-2.81782	0.00643782	0.530095
ENST00000332246	1.31084	-0.419406	2.81743	0.00644193	0.530095
ENST00000568742	1.10218	-0.200954	2.81679	0.00645341	0.530095
ENST00000579249	1.14712	-0.118121	2.81665	0.00645587	0.530095
ENST00000379297	0.907473	1.33076	2.81788	0.00646073	0.530095
ENST00000550300	-1.26771	0.871952	-2.81634	0.00646136	0.530095
ENST00000614059	1.05568	0.42694	2.81601	0.00646739	0.530095
ENST00000644198	-1.35521	0.806585	-2.81596	0.00646814	0.530095
ENST00000233997	-1.45264	-0.643115	-2.81593	0.00646881	0.530095
ENST00000549613	-1.27468	1.68556	-2.81572	0.00647258	0.530095
ENST00000565861	1.20467	1.13889	2.81524	0.00648108	0.530095
ENST00000609485	0.964387	0.891681	2.81664	0.00648186	0.530095
ENST00000342743	-1.93058	4.45299	-2.81562	0.00649831	0.530095
ENST00000472191	-1.78119	0.828627	-2.81312	0.00651918	0.530095
ENST00000357495	-0.561329	5.46846	-2.81411	0.00652637	0.530095
ENST00000411602	0.922627	2.12229	2.81259	0.00652873	0.530095
ENST00000473135	-1.3233	-2.04783	-2.81335	0.00653714	0.530095
ENST00000479743	0.914461	2.12115	2.8134	0.0065394	0.530095
ENST00000451328	-1.51367	-2.01612	-2.81151	0.00656218	0.530095
ENST00000499247	0.816141	2.63077	2.81019	0.00657199	0.530095
ENST00000488719	-1.43461	0.822188	-2.81043	0.00657477	0.530095
ENST00000529127	-1.48098	-1.03727	-2.80995	0.00657636	0.530095
ENST00000527449	-1.07201	0.58198	-2.8109	0.0065855	0.530095
ENST00000578653	1.17307	-0.111664	2.81043	0.00659313	0.530095
ENST00000443870	0.543028	5.51823	2.80885	0.00659635	0.530095
ENST00000375153	-1.4128	0.283173	-2.80837	0.00660511	0.530095
ENST00000548738	-1.48637	-0.0817788	-2.80803	0.00661138	0.530095
ENST00000482587	0.391446	6.30002	2.80912	0.00661813	0.530095
ENST00000393319	-1.51653	0.651614	-2.80788	0.00662651	0.530095
ENST00000423723	-0.633744	4.92982	-2.80832	0.00662821	0.530095
ENST00000426704	-0.977878	1.97865	-2.80799	0.0066389	0.530095
ENST00000441716	-1.50732	-1.16307	-2.80682	0.00665427	0.530095
ENST00000371968	-1.08911	0.988424	-2.80486	0.00666942	0.530095
ENST00000604396	0.957718	1.00376	2.80564	0.0066773	0.530095
ENST00000504087	0.535643	5.37579	2.80584	0.00667856	0.530095
ENST00000462957	0.418081	4.71976	2.80558	0.00668379	0.530095
ENST00000560090	-1.86934	-0.972906	-2.80491	0.00668439	0.530095
ENST00000425075	1.04672	0.243932	2.80508	0.00668727	0.530095
ENST00000382897	-1.80995	-0.550325	-2.80322	0.00671439	0.530095
ENST00000552943	-0.780722	2.95972	-2.80344	0.00671808	0.530095
ENST00000417801	1.26561	-0.963887	2.80179	0.00672595	0.530095
ENST00000597015	-1.65182	-0.019713	-2.80224	0.00672878	0.530095
ENST00000294053	0.365339	5.32349	2.80225	0.00674365	0.530095
ENST00000262648	0.83516	4.13246	2.8021	0.00674519	0.530095
ENST00000533940	1.24804	-0.0357511	2.80206	0.00674738	0.530095
ENST00000644180	1.39447	0.598348	2.80124	0.00675986	0.530095
ENST00000521702	0.939273	1.66879	2.80062	0.00677313	0.530095
ENST00000480904	1.11521	0.457953	2.79885	0.0067806	0.530095
ENST00000414584	1.53358	-0.369442	2.79885	0.00678066	0.530095
ENST00000422958	1.20919	-1.31221	2.79981	0.00678408	0.530095
ENST00000427953	1.18799	-0.808845	2.79967	0.00678817	0.530095
ENST00000524433	-1.28562	-1.79312	-2.79825	0.00679187	0.530095
ENST00000370474	-0.519155	4.09232	-2.79796	0.00679719	0.530095
ENST00000608816	-1.56712	-1.09018	-2.79717	0.00681201	0.530095
ENST00000509366	0.603259	3.96851	2.79717	0.0068121	0.530095
ENST00000455714	-1.37893	1.00741	-2.79783	0.00681324	0.530095
ENST00000583058	-1.29415	-1.90671	-2.79688	0.00681742	0.530095
ENST00000417486	0.483854	3.5548	2.79677	0.00684705	0.530095
ENST00000502641	-1.04859	1.71709	-2.79617	0.0068493	0.530095
ENST00000469781	-1.20138	1.24327	-2.79517	0.00684969	0.530095
ENST00000547912	-1.26832	-1.24614	-2.79595	0.00685795	0.530095
ENST00000526405	1.45921	1.58433	2.79474	0.00687348	0.530095
ENST00000523227	1.15627	0.33831	2.79513	0.00687783	0.530095
ENST00000601587	1.47486	-0.628084	2.79511	0.00687849	0.530095
ENST00000488619	0.943322	-0.322018	2.7949	0.00688285	0.530095
ENST00000365188	0.787534	7.41826	2.79425	0.00689383	0.530095
ENST00000493163	1.21477	-0.416517	2.79343	0.0069081	0.530095
ENST00000519361	0.780015	2.13889	2.79189	0.00691157	0.530095
ENST00000484449	0.601426	3.1408	2.79175	0.00691423	0.530095
ENST00000462572	-1.63132	-1.55461	-2.79108	0.00692712	0.530095
ENST00000492667	-0.770433	3.40275	-2.79065	0.00693516	0.530095
ENST00000606629	0.790243	2.61583	2.79051	0.00693785	0.530095
ENST00000491136	-0.708165	3.81028	-2.79047	0.00693866	0.530095
ENST00000458438	1.24718	-0.495309	2.79167	0.00694203	0.530095
ENST00000552093	1.02705	-0.92414	2.79017	0.00694438	0.530095
ENST00000411065	1.20891	-1.50648	2.78984	0.00695064	0.530095
ENST00000266037	-0.296943	10.8007	-2.78922	0.00696244	0.530095
ENST00000559500	-0.95312	1.86476	-2.78901	0.00696661	0.530095
ENST00000420046	0.745815	2.09162	2.79025	0.00696943	0.530095
ENST00000602734	1.18329	-1.42221	2.78915	0.00699168	0.530095
ENST00000585899	-1.37976	-1.93244	-2.78781	0.00699652	0.530095
ENST00000381871	0.924525	1.33266	2.78595	0.00702534	0.530095
ENST00000432268	1.00092	1.5457	2.78669	0.00703576	0.530095
ENST00000449152	1.54568	0.615805	2.78522	0.00703939	0.530095
ENST00000367941	0.287722	7.47614	2.78588	0.00705528	0.530095
ENST00000428785	-1.26081	-1.7529	-2.78457	0.00706157	0.530095
ENST00000511494	0.394517	5.7289	2.7854	0.00706264	0.530095
ENST00000624033	-1.60676	-1.77326	-2.78432	0.00706446	0.530095
ENST00000422807	-1.4116	-1.28028	-2.78422	0.00706876	0.530095
ENST00000316586	-0.470865	4.70747	-2.78478	0.00707062	0.530095
ENST00000440965	-1.33347	-1.56293	-2.78362	0.0070716	0.530095
ENST00000529575	-1.54596	-0.591782	-2.78334	0.00707578	0.530095
ENST00000401053	-1.16658	0.646349	-2.78265	0.00708924	0.530095
ENST00000584484	0.945742	1.44242	2.78239	0.00709416	0.530095
ENST00000487671	-1.00236	0.951866	-2.78341	0.00710082	0.530095
ENST00000486853	1.19476	-1.10955	2.7834	0.00710222	0.530095
ENST00000488109	1.33301	-0.156391	2.78189	0.00710385	0.530095
ENST00000456601	-1.21624	0.641123	-2.78184	0.00710483	0.530095
ENST00000558031	-1.24543	0.317562	-2.78242	0.0071155	0.530095
ENST00000305253	0.425662	8.08668	2.78238	0.00712229	0.530095
ENST00000593076	-0.962699	1.92726	-2.78205	0.00712632	0.530095
ENST00000494859	0.646116	2.33294	2.78062	0.00712872	0.530095
ENST00000546733	-0.756439	1.99668	-2.78113	0.00714672	0.530095
ENST00000494062	0.726004	2.36577	2.77931	0.00715426	0.530095
ENST00000477552	-0.726649	3.40398	-2.77918	0.00715692	0.530095
ENST00000355520	0.350289	7.35322	2.77857	0.00716894	0.530095
ENST00000586859	-0.577315	3.35786	-2.77927	0.007177	0.530095
ENST00000458547	-1.33696	-0.937662	-2.77729	0.00719404	0.530095
ENST00000436222	-1.41978	-1.42316	-2.77704	0.0071993	0.530095
ENST00000407540	1.3763	0.1062	2.77675	0.00723039	0.530095
ENST00000559206	1.47383	1.68016	2.7762	0.00723485	0.530095
ENST00000578998	-0.912932	4.1432	-2.77607	0.00723768	0.530095
ENST00000505645	1.08834	0.899636	2.77503	0.00723864	0.530095
ENST00000372574	-1.37717	-1.23915	-2.77402	0.00725867	0.530095
ENST00000567141	-1.70639	2.44089	-2.77541	0.00725956	0.530095
ENST00000363405	1.24903	1.06329	2.7739	0.00726119	0.530095
ENST00000330055	1.47223	0.202137	2.77454	0.00726311	0.530095
ENST00000361320	0.479874	6.8324	2.77513	0.00726447	0.530095
ENST00000554092	-0.819136	3.15801	-2.7745	0.00726835	0.530095
ENST00000572684	-0.931256	2.81943	-2.7725	0.00728894	0.530095
ENST00000438675	1.10174	0.874125	2.77238	0.00729138	0.530095
ENST00000569095	0.924963	1.67454	2.77319	0.00730406	0.530095
ENST00000537880	-0.873631	2.77816	-2.77138	0.00731128	0.530095
ENST00000471649	-1.38005	-0.960337	-2.77082	0.00732255	0.530095
ENST00000651085	-1.3091	-0.174477	-2.77058	0.00732736	0.530095
ENST00000216264	0.484879	6.23534	2.77192	0.00732909	0.530095
ENST00000555481	-1.47018	-1.28938	-2.77045	0.00732998	0.530095
ENST00000454780	-2.2709	0.427108	-2.77119	0.00733728	0.530095
ENST00000489438	-1.52666	-0.801132	-2.76889	0.00736131	0.530095
ENST00000613919	1.22498	-0.0135639	2.76879	0.00736338	0.530095
ENST00000472429	-1.58273	-0.201167	-2.76864	0.00736623	0.530095
ENST00000652393	1.21261	0.0222883	2.76862	0.00736669	0.530095
ENST00000637250	-1.35741	-1.52673	-2.76732	0.00739295	0.530095
ENST00000570103	0.954857	0.930073	2.76839	0.0073947	0.530095
ENST00000509479	-0.59979	5.85673	-2.76622	0.00741525	0.530095
ENST00000438290	1.19393	1.75823	2.76726	0.00742152	0.530095
ENST00000292114	0.396857	4.39552	2.76704	0.00742262	0.530095
ENST00000443497	0.951448	0.506423	2.76726	0.00742285	0.530095
ENST00000525748	-1.57176	0.331413	-2.76565	0.00742676	0.530095
ENST00000446662	-0.768024	4.76809	-2.76629	0.00743605	0.530095
ENST00000554664	1.07566	0.542231	2.76641	0.00743896	0.530095
ENST00000485066	-0.665702	2.67678	-2.76612	0.00744543	0.530095
ENST00000489501	0.771352	6.02164	2.76533	0.00745818	0.530095
ENST00000508313	-1.30339	-1.17492	-2.76421	0.00746633	0.530095
ENST00000417716	0.68551	2.90512	2.76477	0.00746736	0.530095
ENST00000317757	0.907613	2.32491	2.76432	0.00748245	0.530095
ENST00000322954	1.31482	2.45634	2.76287	0.00748331	0.530095
ENST00000439431	-1.37095	-1.03164	-2.76258	0.00748915	0.530095
ENST00000362378	1.03279	0.969938	2.76245	0.00749186	0.530095
ENST00000482041	1.42938	-0.236136	2.7634	0.00749457	0.530095
ENST00000619805	1.15293	-0.28309	2.76225	0.00749592	0.530095
ENST00000422556	0.762446	2.07612	2.76349	0.00749706	0.530095
ENST00000287020	1.38699	-0.0980897	2.7621	0.00749916	0.530095
ENST00000564192	-1.32589	0.0784464	-2.76193	0.00750259	0.530095
ENST00000622998	0.631962	3.86101	2.76251	0.00751396	0.530095
ENST00000463225	1.32127	-0.276984	2.76115	0.00751857	0.530095
ENST00000560571	1.32587	-0.216302	2.76229	0.00752436	0.530095
ENST00000429771	-1.3729	-1.21508	-2.76086	0.00752442	0.530095
ENST00000432045	0.470774	8.06743	2.76228	0.00752504	0.530095
ENST00000464063	1.03896	-0.0162226	2.76222	0.00752571	0.530095
ENST00000586625	1.40741	0.775446	2.76188	0.00752981	0.530095
ENST00000546835	-1.47836	-1.89989	-2.76047	0.00753253	0.530095
ENST00000439736	0.857039	2.52	2.76126	0.00754349	0.530095
ENST00000419499	-1.3089	-0.132257	-2.75942	0.00755401	0.530095
ENST00000288221	-0.913897	4.05871	-2.76061	0.00755627	0.530095
ENST00000519382	-1.06451	0.561816	-2.76052	0.00755878	0.530095
ENST00000600959	1.17679	-0.506228	2.75902	0.00756235	0.530095
ENST00000611988	1.04676	0.706296	2.76043	0.00756246	0.530095
ENST00000417685	1.05568	1.14538	2.76031	0.00756455	0.530095
ENST00000368149	0.795126	6.49473	2.75865	0.00756994	0.530095
ENST00000367821	1.2317	0.16393	2.75901	0.00758047	0.530095
ENST00000605806	0.919103	2.14847	2.75848	0.00760148	0.530095
ENST00000434524	0.974635	0.931733	2.75666	0.00761117	0.530095
ENST00000588305	1.17427	-0.246484	2.75773	0.00761188	0.530095
ENST00000511000	-1.49732	1.31138	-2.7561	0.00762287	0.530095
ENST00000354232	0.570356	3.58956	2.75592	0.00762663	0.530095
ENST00000238918	0.528402	3.74863	2.75694	0.0076342	0.530095
ENST00000533218	-1.34369	-0.927351	-2.75523	0.00764098	0.530095
ENST00000599761	-1.43443	-0.656016	-2.7552	0.0076445	0.530095
ENST00000553457	0.636895	2.69655	2.75498	0.00764599	0.530095
ENST00000476979	1.12656	0.142874	2.75611	0.00765123	0.530095
ENST00000508033	1.3851	-0.819364	2.75391	0.0076684	0.530095
ENST00000258455	-0.468911	5.17486	-2.7539	0.00766865	0.530095
ENST00000331442	-1.87949	0.0059445	-2.7536	0.00767499	0.530095
ENST00000242819	-1.30521	-1.76691	-2.75448	0.00767612	0.530095
ENST00000524798	-1.15225	-0.78761	-2.75339	0.0076793	0.530095
ENST00000523303	-1.34112	-0.889743	-2.75308	0.00768586	0.530095
ENST00000403729	1.34204	1.31725	2.75408	0.00769299	0.530095
ENST00000567135	-1.51596	-0.314173	-2.75252	0.0076974	0.530095
ENST00000470371	-1.10957	2.42441	-2.75342	0.00770613	0.530095
ENST00000332715	-1.38319	-1.08574	-2.75191	0.00771031	0.530095
ENST00000604751	0.509101	4.19955	2.75144	0.00772021	0.530095
ENST00000424294	-1.50626	-0.291135	-2.75139	0.0077213	0.530095
ENST00000604900	-1.30836	-1.76456	-2.74914	0.00776872	0.530562
ENST00000617930	-1.46644	-1.71304	-2.74908	0.00776994	0.530562
ENST00000637926	-1.48351	1.97099	-2.74901	0.00777141	0.530562
ENST00000481331	-1.38265	0.438628	-2.74981	0.00777946	0.530562
ENST00000371984	-1.28156	0.0566065	-2.7495	0.00778034	0.530562
ENST00000480536	-1.24763	-1.30697	-2.7479	0.00779481	0.530562
ENST00000367993	-1.52591	-1.16166	-2.74783	0.00779643	0.530562
ENST00000608574	0.540954	3.569	2.74771	0.00779888	0.530562
ENST00000477049	1.14198	0.773726	2.74803	0.00782148	0.530562
ENST00000567010	-1.23463	-1.03788	-2.74664	0.00782177	0.530562
ENST00000652005	1.14278	-0.480847	2.7463	0.00782885	0.530562
ENST00000622996	0.369558	5.84534	2.74711	0.00784054	0.530562
ENST00000410009	-1.62462	-1.32777	-2.74571	0.00784139	0.530562
ENST00000264229	1.22	-0.828874	2.74647	0.00784824	0.530562
ENST00000478164	-1.33214	-1.12485	-2.74523	0.00785171	0.530562
ENST00000561202	-1.42201	-1.09225	-2.74468	0.00786341	0.530562
ENST00000490623	-1.20961	1.12865	-2.74527	0.00786369	0.530562
ENST00000494787	-1.1103	0.465247	-2.74485	0.00788015	0.530562
ENST00000482435	-1.35741	-0.186226	-2.7438	0.00788231	0.530562
ENST00000472465	-1.50265	-0.9956	-2.74375	0.00788342	0.530562
ENST00000509777	0.855474	2.15671	2.74513	0.00788365	0.530562
ENST00000592880	-1.32017	-1.98541	-2.74423	0.00789006	0.530562
ENST00000430665	-1.32144	-2.01901	-2.74328	0.0078934	0.530562
ENST00000331163	0.829945	3.0406	2.74417	0.0079	0.530562
ENST00000412287	-1.57111	-1.0483	-2.74233	0.0079139	0.530562
ENST00000271375	0.834609	5.46894	2.74353	0.00791681	0.530562
ENST00000469783	-1.46668	0.143196	-2.74151	0.00793158	0.530562
ENST00000570913	0.903715	1.38732	2.7415	0.00793177	0.530562
ENST00000552212	1.19869	-0.396733	2.74146	0.00793265	0.530562
ENST00000592791	-1.41513	-0.386546	-2.74057	0.00795188	0.530562
ENST00000502162	1.10064	0.739775	2.74129	0.00796493	0.530562
ENST00000205636	0.756397	4.25244	2.73979	0.00796874	0.530562
ENST00000555655	1.22299	-0.422294	2.74069	0.00797638	0.530562
ENST00000567278	0.679773	3.7038	2.73941	0.00797693	0.530562
ENST00000457984	1.02176	0.49179	2.73952	0.0080024	0.530562
ENST00000428004	-0.747561	2.85917	-2.73776	0.00801274	0.530562
ENST00000474975	1.28774	-1.30934	2.73799	0.00802462	0.530562
ENST00000495312	-1.24929	-0.788758	-2.73708	0.00802752	0.530562
ENST00000526550	0.721436	2.99161	2.73682	0.00803319	0.530562
ENST00000447427	0.721973	3.86369	2.73794	0.00803852	0.530562
ENST00000441700	-1.47081	-1.14536	-2.73612	0.00804849	0.530562
ENST00000482485	-0.650022	4.42055	-2.73588	0.00805364	0.530562
ENST00000589539	0.668417	3.36181	2.73577	0.00805606	0.530562
ENST00000561254	0.77009	2.59273	2.73646	0.00807019	0.530562
ENST00000315930	0.87969	5.20036	2.73598	0.00808046	0.530562
ENST00000565684	-1.60005	-0.277439	-2.73528	0.00809285	0.530562
ENST00000174618	0.380984	5.97662	2.73476	0.00809901	0.530562
ENST00000586667	-1.2046	1.19935	-2.73374	0.00810061	0.530562
ENST00000582992	-1.17409	-1.17107	-2.73466	0.00810404	0.530562
ENST00000539713	-1.02598	2.89007	-2.73334	0.00810942	0.530562
ENST00000310301	0.379142	5.52485	2.73439	0.00811517	0.530562
ENST00000467426	1.11113	-1.03817	2.73391	0.00812194	0.530562
ENST00000563501	-1.00441	2.47028	-2.73228	0.00813275	0.530562
ENST00000433031	1.20683	-1.02097	2.73218	0.00813496	0.530562
ENST00000428241	1.0922	-0.702953	2.73341	0.0081352	0.530562
ENST00000425296	0.641522	3.64272	2.73216	0.00813533	0.530562
ENST00000472829	-0.935777	0.704841	-2.73313	0.00814091	0.530562
ENST00000312026	0.297512	5.83651	2.73265	0.00815411	0.530562
ENST00000637023	-0.918272	2.47167	-2.73235	0.00815448	0.530562
ENST00000546134	-1.40152	-0.860323	-2.73124	0.0081557	0.530562
ENST00000398065	-0.781054	4.91819	-2.73119	0.00815682	0.530562
ENST00000613538	0.701071	2.68546	2.73174	0.0081753	0.530562
ENST00000634594	0.94337	5.47088	2.72982	0.00818707	0.530562
ENST00000413425	-1.47412	-1.25598	-2.72936	0.00819731	0.530562
ENST00000377541	-0.986817	2.6168	-2.7304	0.00820371	0.530562
ENST00000587928	-0.638711	3.41457	-2.73002	0.00820817	0.530562
ENST00000409622	-1.75136	-0.900136	-2.72871	0.00821163	0.530562
ENST00000569129	1.14921	-1.11179	2.7285	0.00821647	0.530562
ENST00000521381	0.518298	5.48211	2.72987	0.00821664	0.530562
ENST00000494667	-1.44487	-0.625983	-2.72943	0.00821793	0.530562
ENST00000468244	1.04975	0.411217	2.72827	0.00822155	0.530562
ENST00000396076	0.647025	2.8851	2.72824	0.00822226	0.530562
ENST00000489972	-1.29389	-1.93322	-2.72747	0.00823937	0.531025
ENST00000608736	-1.58831	-0.964616	-2.7273	0.00824316	0.531025
ENST00000580891	0.512771	3.5322	2.72668	0.00825692	0.531227
ENST00000397146	1.1105	2.98807	2.72654	0.00826004	0.531227
ENST00000613370	-1.13365	0.93055	-2.72602	0.00827185	0.531544
ENST00000502430	1.12442	-0.761452	2.72662	0.00828862	0.532179
ENST00000606615	1.29896	0.088839	2.72433	0.00830977	0.532754
ENST00000379454	0.685542	3.15091	2.72534	0.00831758	0.532754
ENST00000408818	0.948771	0.593649	2.72487	0.00832575	0.532754
ENST00000466698	-1.28368	-1.09679	-2.72355	0.00832729	0.532754
ENST00000464559	-1.39776	-0.646782	-2.72334	0.00833203	0.532754
ENST00000473056	-1.47402	0.589039	-2.72262	0.00834825	0.532963
ENST00000457779	-1.38413	-1.62068	-2.72244	0.00835237	0.532963
ENST00000484968	-1.32285	-1.38034	-2.72228	0.00835598	0.532963
ENST00000336415	-0.935082	2.32927	-2.72174	0.0083681	0.533124
ENST00000649758	0.745024	2.34984	2.72155	0.0083723	0.533124
ENST00000492049	-1.24462	-1.11867	-2.72064	0.0083931	0.534008
ENST00000531905	-0.840129	2.25067	-2.72057	0.0084132	0.534391
ENST00000532614	1.09324	0.466796	2.72078	0.00841598	0.534391
ENST00000481789	-0.861889	2.70206	-2.71946	0.00841985	0.534391
ENST00000554135	-1.16502	0.350643	-2.7199	0.00842974	0.534579
ENST00000534952	1.05228	0.567843	2.71946	0.00845051	0.535228
ENST00000508626	1.22606	-0.487301	2.71912	0.00845435	0.535228
ENST00000594469	1.05446	-0.312293	2.71892	0.00846171	0.535228
ENST00000478801	1.15737	1.61935	2.71873	0.00846766	0.535228
ENST00000437322	0.714936	2.66942	2.71668	0.00848333	0.53546
ENST00000458361	-1.36181	-1.33338	-2.7166	0.00848518	0.53546
ENST00000585227	-1.35268	-1.25061	-2.71607	0.00850455	0.536244
ENST00000357736	0.352475	6.62184	2.71583	0.00853213	0.536276
ENST00000440244	-1.65427	-1.05364	-2.71531	0.00853542	0.536276
ENST00000363221	-1.26018	0.251849	-2.71479	0.00854008	0.536276
ENST00000648997	1.13298	0.0631862	2.71408	0.00854309	0.536276
ENST00000502574	1.00416	1.1587	2.71513	0.00854401	0.536276
ENST00000338560	0.925547	3.11443	2.71491	0.00854667	0.536276
ENST00000454741	-0.722397	3.21656	-2.71356	0.00855517	0.536373
ENST00000591661	-1.4052	-1.35255	-2.71319	0.0085636	0.536468
ENST00000549670	-1.34094	-1.76912	-2.71234	0.00858739	0.537522
ENST00000327037	-1.31176	-0.666055	-2.71066	0.00862238	0.538195
ENST00000371806	1.90292	-0.1657	2.7104	0.00862843	0.538195
ENST00000488807	0.666052	2.98641	2.71158	0.00862899	0.538195
ENST00000473875	1.18461	-0.527632	2.71161	0.0086301	0.538195
ENST00000520597	1.02316	1.09952	2.71147	0.00863295	0.538195
ENST00000624365	-1.51686	0.203048	-2.70983	0.00864153	0.538296
ENST00000463899	0.746256	3.85946	2.71055	0.0086516	0.538456
ENST00000407637	-0.399812	5.49309	-2.70913	0.00865804	0.538456
ENST00000589702	0.59688	3.73602	2.70845	0.00869281	0.539359
ENST00000484749	0.787614	1.73841	2.7083	0.00869792	0.539359
ENST00000446321	1.16099	-0.116028	2.7073	0.0087008	0.539359
ENST00000635743	0.699207	3.70413	2.70714	0.00870444	0.539359
ENST00000422124	0.922582	1.04144	2.70636	0.0087228	0.539359
ENST00000602982	0.93311	1.05403	2.70746	0.00872388	0.539359
ENST00000414167	-1.22099	0.968844	-2.70623	0.00872594	0.539359
ENST00000619780	-1.43735	0.722557	-2.70613	0.00872837	0.539359
ENST00000582736	0.572096	3.25516	2.70581	0.00873583	0.539389
ENST00000470487	0.642537	3.78076	2.70535	0.00874661	0.539623
ENST00000472385	-1.41439	-1.11781	-2.70484	0.00875866	0.539936
ENST00000497691	-1.26179	0.307838	-2.7037	0.00878557	0.540448
ENST00000647576	-1.28134	0.182962	-2.70368	0.00878606	0.540448
ENST00000486168	1.23434	-0.674257	2.70491	0.00878794	0.540448
ENST00000554240	-1.34444	-1.63722	-2.70323	0.00879667	0.540555
ENST00000511651	-0.611432	4.04719	-2.70183	0.00882992	0.541517
ENST00000467719	1.24099	1.63433	2.70099	0.00884982	0.541517
ENST00000350028	-1.23282	-1.73165	-2.70142	0.00886247	0.541517
ENST00000580256	1.02309	3.31378	2.70124	0.00886775	0.541517
ENST00000485921	-0.923014	2.85966	-2.70116	0.00887494	0.541517
ENST00000573951	0.652575	3.86766	2.70073	0.00888547	0.541517
ENST00000637632	-1.31617	-1.69639	-2.70035	0.00888825	0.541517
ENST00000524031	-1.37451	0.221382	-2.70003	0.00889081	0.541517
ENST00000624657	-1.32132	-1.84021	-2.69866	0.00890568	0.541517
ENST00000314134	0.569391	3.69865	2.69908	0.00891396	0.541517
ENST00000618637	-1.32212	-1.61595	-2.69826	0.00891517	0.541517
ENST00000261205	-1.38316	0.55275	-2.69802	0.00892089	0.541517
ENST00000610087	0.493055	4.71833	2.69892	0.00892545	0.541517
ENST00000563036	0.786522	3.80129	2.69766	0.00892968	0.541517
ENST00000330889	1.33111	1.50903	2.69833	0.00893982	0.541517
ENST00000465825	0.751633	2.51223	2.69745	0.00896351	0.541517
ENST00000370596	1.16367	-1.2804	2.69755	0.00896427	0.541517
ENST00000335247	0.97965	3.68914	2.69575	0.00897562	0.541517
ENST00000364004	-1.30371	-0.437515	-2.69562	0.00897868	0.541517
ENST00000623202	0.979428	2.37531	2.6969	0.00897985	0.541517
ENST00000216489	1.17133	-0.160899	2.69555	0.00898034	0.541517
ENST00000550541	1.12456	-0.0190364	2.69674	0.00898226	0.541517
ENST00000496198	-1.00179	2.32185	-2.69463	0.00900264	0.541517
ENST00000477517	-0.858981	2.6683	-2.69439	0.00900852	0.541517
ENST00000538034	0.609511	3.00128	2.69419	0.00901324	0.541517
ENST00000225275	-1.36936	1.45407	-2.69516	0.00902038	0.541517
ENST00000428825	-1.39749	0.354739	-2.69385	0.00902159	0.541517
ENST00000652292	0.733727	3.1158	2.69352	0.00902947	0.541517
ENST00000408532	-1.17069	-0.736024	-2.69351	0.00902978	0.541517
ENST00000640164	-1.25896	-1.35179	-2.69349	0.00903034	0.541517
ENST00000425470	-1.2389	-1.39053	-2.69284	0.0090503	0.541517
ENST00000370225	-1.91307	-0.144569	-2.69231	0.0090589	0.541517
ENST00000467756	-1.31246	-2.17389	-2.692	0.00906743	0.541517
ENST00000502706	-1.3519	-0.00632921	-2.69201	0.00907971	0.541517
ENST00000515734	1.22854	-0.391327	2.69239	0.00908879	0.541517
ENST00000612444	0.840497	1.83405	2.69187	0.0090983	0.541517
ENST00000638084	-1.43104	1.1091	-2.69048	0.00910352	0.541517
ENST00000562474	-1.23981	0.0832058	-2.69016	0.00911139	0.541517
ENST00000292174	-1.31833	-1.43156	-2.6901	0.00911277	0.541517
ENST00000596148	-0.551201	4.90464	-2.69086	0.00911442	0.541517
ENST00000561187	0.967088	1.10035	2.69003	0.00911457	0.541517
ENST00000381582	0.583826	3.4052	2.69098	0.00911803	0.541517
ENST00000568686	0.380313	9.0283	2.69106	0.00912226	0.541517
ENST00000530589	0.549285	4.32957	2.6897	0.00912272	0.541517
ENST00000427004	-1.32198	-0.484466	-2.68925	0.00913353	0.541517
ENST00000588046	-1.19837	-1.53576	-2.68921	0.00913455	0.541517
ENST00000545841	-1.46299	-0.263156	-2.68951	0.00914582	0.541769
ENST00000435875	1.2858	1.93804	2.68805	0.00916315	0.541984
ENST00000469872	-1.4826	-0.809225	-2.68804	0.00916348	0.541984
ENST00000650432	-1.47678	-1.01402	-2.68809	0.00917998	0.542078
ENST00000306422	-1.73073	-1.09604	-2.68693	0.00919061	0.542078
ENST00000331569	1.2003	3.07958	2.68757	0.00920267	0.542078
ENST00000268933	1.11876	-0.637363	2.68727	0.00921502	0.542078
ENST00000460657	-0.809285	3.51403	-2.68653	0.00921713	0.542078
ENST00000619773	1.21406	1.12373	2.68585	0.00921739	0.542078
ENST00000651973	1.37114	-1.17829	2.68574	0.00922012	0.542078
ENST00000522499	-1.31181	-0.47904	-2.68568	0.00922159	0.542078
ENST00000483825	-1.36867	0.022944	-2.68615	0.00923615	0.542078
ENST00000326495	0.416796	5.33456	2.68625	0.00923899	0.542078
ENST00000461757	-1.25038	0.257734	-2.6857	0.00924283	0.542078
ENST00000548075	1.10135	0.576052	2.68589	0.0092492	0.542078
ENST00000490929	0.740817	1.9611	2.68533	0.00926207	0.542335
ENST00000589610	1.18928	-1.82244	2.68454	0.00926763	0.542335
ENST00000391247	1.30956	-0.806638	2.68354	0.00929982	0.543793
ENST00000442569	0.968601	1.69988	2.68209	0.00931086	0.543793
ENST00000527240	1.18133	-0.741738	2.6831	0.00931365	0.543793
ENST00000513025	-0.869884	1.58153	-2.68164	0.00932186	0.543862
ENST00000486744	-1.23758	-0.163892	-2.68097	0.00933869	0.544215
ENST00000431877	-1.31375	-1.0567	-2.68069	0.00934583	0.544215
ENST00000489387	-1.19914	-0.905486	-2.68056	0.00934904	0.544215
ENST00000474808	0.370964	5.39876	2.67999	0.00936332	0.544636
ENST00000266068	-1.36804	-0.48833	-2.6785	0.00940069	0.544987
ENST00000453678	-1.31134	-1.51901	-2.67836	0.0094043	0.544987
ENST00000430897	-1.88135	-0.138689	-2.67799	0.00941456	0.544987
ENST00000436514	-1.46042	-1.19692	-2.67831	0.00941991	0.544987
ENST00000376896	-1.56886	5.3218	-2.67897	0.00942042	0.544987
ENST00000595358	-0.650051	5.24142	-2.67846	0.00942756	0.544987
ENST00000496682	-1.31976	-1.19304	-2.67773	0.00943202	0.544987
ENST00000495047	-1.21748	-0.196877	-2.67816	0.00943283	0.544987
ENST00000476693	-0.937283	1.47913	-2.67753	0.00945804	0.544987
ENST00000520991	1.11403	0.0419719	2.67614	0.00946024	0.544987
ENST00000313400	-1.22317	-1.91749	-2.67616	0.0094648	0.544987
ENST00000635359	1.01029	-1.58368	2.67573	0.00947071	0.544987
ENST00000527864	-1.48928	1.22648	-2.67555	0.00947519	0.544987
ENST00000425551	1.08015	0.77896	2.67663	0.00947603	0.544987
ENST00000634733	-1.68396	-0.432955	-2.67607	0.00948098	0.544987
ENST00000574721	-0.568654	4.34336	-2.67626	0.00948436	0.544987
ENST00000379503	-1.61328	-1.79278	-2.6749	0.00949178	0.544987
ENST00000484934	-1.09364	1.62617	-2.67484	0.00950142	0.544987
ENST00000623735	-1.29115	-1.10167	-2.67427	0.00950762	0.544987
ENST00000560488	-1.27527	-1.78804	-2.67417	0.00951034	0.544987
ENST00000468031	-1.32173	0.0315376	-2.67435	0.00952574	0.545276
ENST00000369697	0.720663	6.96828	2.67443	0.0095373	0.545276
ENST00000374045	1.50176	-0.125217	2.67284	0.00954406	0.545276
ENST00000428732	-1.27478	-1.24202	-2.67268	0.00954837	0.545276
ENST00000567355	-0.887658	2.77429	-2.67234	0.00955686	0.545276
ENST00000496958	1.19007	-0.742766	2.67351	0.00955771	0.545276
ENST00000441363	-0.685951	3.40632	-2.67194	0.00956717	0.545413
ENST00000625111	-1.31627	-2.05944	-2.67148	0.00957892	0.545419
ENST00000418176	-1.11344	-0.540918	-2.6726	0.00958139	0.545419
ENST00000568646	-1.98346	-0.203644	-2.67168	0.00959703	0.545432
ENST00000584570	-1.20322	2.00886	-2.67164	0.00960345	0.545432
ENST00000505213	-1.23021	-1.18914	-2.67128	0.00960734	0.545432
ENST00000465525	-0.955552	2.60091	-2.67028	0.00960983	0.545432
ENST00000310442	0.39573	5.22095	2.66958	0.00962777	0.546037
ENST00000623749	-1.23683	-1.66183	-2.67033	0.00963462	0.546037
ENST00000527658	0.616574	3.84925	2.66982	0.00964352	0.546141
ENST00000415949	1.43169	0.785329	2.66954	0.00965674	0.5462
ENST00000412240	-1.45286	-1.29612	-2.66838	0.00965869	0.5462
ENST00000420058	-1.4703	-1.41407	-2.66844	0.00966806	0.54633
ENST00000230792	0.964815	2.07712	2.6688	0.00968088	0.546403
ENST00000418344	1.05426	2.08286	2.66742	0.00968348	0.546403
ENST00000562254	0.552592	4.06372	2.66767	0.00970789	0.547381
ENST00000379938	-1.70867	1.06357	-2.66709	0.00972262	0.547811
ENST00000331222	0.341321	6.04862	2.666	0.00975232	0.548416
ENST00000364509	1.39093	0.3001	2.66579	0.00975357	0.548416
ENST00000421480	0.565804	3.53778	2.66592	0.00975464	0.548416
ENST00000376302	-1.29944	-0.204299	-2.66416	0.00976807	0.548622
ENST00000623502	0.787706	2.96061	2.66507	0.00977249	0.548622
ENST00000400825	-1.22471	0.0803697	-2.66371	0.00977976	0.548632
ENST00000512701	0.326824	7.23059	2.66472	0.00978757	0.548672
ENST00000510576	-1.37841	-1.85222	-2.66308	0.0097963	0.548763
ENST00000625916	-0.85391	1.48591	-2.66247	0.00981217	0.548947
ENST00000309683	-0.370829	6.00387	-2.66277	0.00983513	0.548947
ENST00000580862	1.063	0.515089	2.66153	0.00983695	0.548947
ENST00000417208	1.32466	-1.40603	2.66202	0.00984017	0.548947
ENST00000647406	0.92546	1.25385	2.66224	0.00984097	0.548947
ENST00000554597	-1.23223	-2.00998	-2.66221	0.00984218	0.548947
ENST00000488243	1.32949	-0.15514	2.65989	0.00987984	0.550388
ENST00000402260	1.05816	-1.93508	2.66039	0.00989542	0.550388
ENST00000488837	-0.782518	2.3724	-2.65915	0.00989956	0.550388
ENST00000577549	-0.675835	2.56805	-2.65913	0.0099	0.550388
ENST00000361246	-0.273975	9.12603	-2.65983	0.00990952	0.550388
ENST00000218981	-0.952153	2.09917	-2.6589	0.00993426	0.550388
ENST00000477876	-1.09955	-1.76518	-2.65782	0.00993473	0.550388
ENST00000335681	-1.06998	4.44057	-2.65889	0.00993747	0.550388
ENST00000515088	-1.79048	-0.423328	-2.65822	0.00993875	0.550388
ENST00000458554	-1.20016	-0.0327515	-2.65732	0.00996574	0.550388
ENST00000602701	1.19419	-0.500002	2.6575	0.0099769	0.550388
ENST00000396820	-1.50374	-1.99893	-2.65583	0.00998736	0.550388
ENST00000392471	-1.33971	-0.553345	-2.65583	0.00998751	0.550388
ENST00000449969	-1.10877	2.19298	-2.65554	0.0099952	0.550388
ENST00000483389	-1.34744	-1.13499	-2.6555	0.00999617	0.550388
ENST00000298943	1.42993	1.76249	2.65626	0.0100039	0.550388
ENST00000592680	0.82787	3.12247	2.65617	0.0100052	0.550388
ENST00000512308	-1.4266	-0.294257	-2.65505	0.0100081	0.550388
ENST00000479938	-0.66509	5.77309	-2.65498	0.01001	0.550388
ENST00000370445	1.40092	0.67829	2.65477	0.0100155	0.550388
ENST00000529086	0.584661	2.94089	2.6547	0.0100175	0.550388
ENST00000450936	0.623199	2.67181	2.65481	0.0100439	0.550834
ENST00000650306	-1.2118	-0.819943	-2.6526	0.0100736	0.550834
ENST00000649425	0.727141	3.31239	2.65243	0.0100782	0.550834
ENST00000411376	1.16355	-1.66023	2.65224	0.0100832	0.550834
ENST00000624924	1.07999	0.901214	2.6522	0.0100844	0.550834
ENST00000519521	-1.18428	-2.03292	-2.65251	0.0100847	0.550834
ENST00000623229	0.769637	1.71375	2.65324	0.010091	0.550834
ENST00000338733	1.22053	-0.658193	2.6523	0.010112	0.550834
ENST00000396039	-1.29462	-1.68325	-2.65115	0.0101126	0.550834
ENST00000467105	1.13841	0.263002	2.65215	0.0101156	0.550834
ENST00000603521	0.492646	3.94334	2.65197	0.0101253	0.550834
ENST00000458681	-1.32593	-1.61844	-2.65065	0.0101261	0.550834
ENST00000498378	-0.690875	4.04098	-2.65154	0.0101293	0.550834
ENST00000265753	-1.23113	-1.58053	-2.65054	0.0101353	0.550834
ENST00000595006	-0.969608	1.97821	-2.65145	0.0101356	0.550834
ENST00000534720	-0.952494	3.23412	-2.65125	0.0101414	0.550834
ENST00000428080	1.28114	0.188667	2.6496	0.0101543	0.550834
ENST00000451037	-1.02289	3.29706	-2.64966	0.0101792	0.550834
ENST00000478904	-0.98535	1.01758	-2.64973	0.010185	0.550834
ENST00000379919	-1.06256	4.71031	-2.64928	0.010196	0.550834
ENST00000558014	0.817335	3.90648	2.64911	0.0101967	0.550834
ENST00000316375	-1.37796	-1.61888	-2.64781	0.0102027	0.550834
ENST00000472175	1.14263	-0.456096	2.64894	0.0102051	0.550834
ENST00000314835	-0.697304	5.0232	-2.64746	0.0102124	0.550834
ENST00000534225	1.69833	-0.225921	2.64826	0.0102125	0.550834
ENST00000608299	-1.40444	-0.224269	-2.64814	0.0102233	0.550834
ENST00000390503	-1.1208	-1.20348	-2.64779	0.0102295	0.550834
ENST00000558950	-1.29937	-0.444546	-2.647	0.0102336	0.550834
ENST00000421256	-1.3998	-0.0159075	-2.64646	0.0102394	0.550834
ENST00000542104	1.53303	1.00042	2.64627	0.0102446	0.550834
ENST00000588251	0.861541	1.07213	2.64618	0.0102471	0.550834
ENST00000495793	-1.038	2.17698	-2.64572	0.0102598	0.550834
ENST00000604929	-1.40732	0.426894	-2.64638	0.0102673	0.550834
ENST00000518472	-1.4413	-0.93741	-2.64542	0.0102679	0.550834
ENST00000394434	0.805987	2.06897	2.64514	0.0102756	0.550862
ENST00000548986	-1.19097	-2.05578	-2.64477	0.0102871	0.551098
ENST00000580803	0.801264	0.841819	2.64564	0.0102971	0.551251
ENST00000508376	-1.29161	-1.35405	-2.644	0.0103102	0.551572
ENST00000376352	0.530995	4.7993	2.64446	0.0103254	0.551709
ENST00000533412	1.19706	-0.156399	2.64424	0.0103339	0.551709
ENST00000577203	1.25818	0.65171	2.64364	0.0103509	0.551709
ENST00000420938	1.06674	0.490569	2.64231	0.0103529	0.551709
ENST00000495732	-1.71992	1.29258	-2.64354	0.010353	0.551709
ENST00000534795	-1.35366	-0.401749	-2.64202	0.0103611	0.551709
ENST00000466261	-1.22379	0.155395	-2.64196	0.0103627	0.551709
ENST00000449205	0.69344	1.66544	2.64264	0.0103772	0.551939
ENST00000450258	0.860157	2.28537	2.64126	0.0103819	0.551939
ENST00000311922	1.27326	1.73507	2.64217	0.0103885	0.551939
ENST00000621332	-0.385997	6.88885	-2.64074	0.0103961	0.551967
ENST00000258613	-1.3015	-1.20923	-2.63949	0.0104307	0.553424
ENST00000372521	-1.39571	0.985597	-2.63818	0.010467	0.553519
ENST00000532194	-1.1843	0.572526	-2.63775	0.010479	0.553519
ENST00000569848	-1.26081	0.577094	-2.63754	0.0104849	0.553519
ENST00000573328	-1.27351	-1.80597	-2.6374	0.0104887	0.553519
ENST00000492342	-0.745709	3.98864	-2.63695	0.0105014	0.553519
ENST00000436249	-0.63454	4.07003	-2.63802	0.0105061	0.553519
ENST00000543292	1.10635	0.639214	2.63758	0.0105153	0.553519
ENST00000604641	-1.31732	-1.92563	-2.63643	0.0105158	0.553519
ENST00000636697	1.31093	-0.349218	2.6364	0.0105167	0.553519
ENST00000520229	-1.3337	-1.05326	-2.63597	0.0105318	0.553519
ENST00000548478	-0.908311	2.12991	-2.6366	0.0105433	0.553519
ENST00000506361	-1.51835	-1.74889	-2.63554	0.0105438	0.553519
ENST00000624540	1.27016	0.10911	2.63655	0.0105461	0.553519
ENST00000630991	-1.18043	0.0873686	-2.63524	0.010549	0.553519
ENST00000485549	-1.37732	-0.30059	-2.63521	0.0105499	0.553519
ENST00000370490	-0.838264	5.29951	-2.63621	0.0105527	0.553519
ENST00000559410	-1.31721	-1.91529	-2.63505	0.0105543	0.553519
ENST00000620253	-1.29227	-0.679588	-2.63501	0.0105683	0.553881
ENST00000490232	0.657804	13.9629	2.63325	0.0106259	0.556522
ENST00000467652	0.805122	2.21273	2.63275	0.0106491	0.557199
ENST00000227155	1.27509	0.112679	2.63183	0.0106533	0.557199
ENST00000482018	1.12118	0.303707	2.63201	0.0106693	0.557567
ENST00000554149	-1.45269	-1.01618	-2.63172	0.0106747	0.557567
ENST00000563991	1.061	1.48104	2.63005	0.0106949	0.558245
ENST00000609220	0.84588	1.95137	2.63051	0.0107158	0.558396
ENST00000568777	0.283516	6.4163	2.62927	0.0107173	0.558396
ENST00000456857	-1.1557	1.27893	-2.62901	0.0107246	0.558396
ENST00000461511	0.870592	2.83161	2.63015	0.0107267	0.558396
ENST00000474968	-1.38101	-0.39983	-2.62852	0.0107386	0.558636
ENST00000489885	-0.729387	2.72649	-2.62915	0.0107544	0.559027
ENST00000375135	-0.412924	6.44208	-2.62851	0.0107605	0.559027
ENST00000649272	1.04959	-1.04522	2.6272	0.0107759	0.559132
ENST00000461693	-0.875198	2.50444	-2.62673	0.0107893	0.559132
ENST00000523572	-1.35051	-0.124866	-2.62738	0.0107983	0.559132
ENST00000508775	-1.25999	-2.18543	-2.62705	0.0108053	0.559132
ENST00000366513	0.365948	5.73337	2.62734	0.0108074	0.559132
ENST00000291576	-1.68603	-0.548906	-2.62553	0.0108237	0.559132
ENST00000611877	0.736686	2.72452	2.62647	0.0108307	0.559132
ENST00000489816	-1.43202	-0.654214	-2.62525	0.0108402	0.559132
ENST00000472297	-0.766163	4.80223	-2.62581	0.0108508	0.559132
ENST00000431078	-0.513973	8.96584	-2.62565	0.0108509	0.559132
ENST00000269582	-1.47796	-0.97101	-2.62535	0.0108521	0.559132
ENST00000498147	0.551565	3.16459	2.62562	0.010855	0.559132
ENST00000348159	-1.37807	-0.596455	-2.62438	0.0108566	0.559132
ENST00000543646	1.00226	1.0407	2.62435	0.0108924	0.559178
ENST00000415266	-1.19147	-1.94009	-2.62265	0.0109065	0.559178
ENST00000421486	0.638873	3.13613	2.62313	0.0109167	0.559178
ENST00000398015	-0.798214	3.14627	-2.62334	0.0109212	0.559178
ENST00000366952	-1.29977	-1.71806	-2.62236	0.0109249	0.559178
ENST00000457059	-1.08185	-1.37679	-2.62146	0.0109407	0.559178
ENST00000543324	0.759347	1.80672	2.62249	0.0109469	0.559178
ENST00000390523	-1.40167	-0.189492	-2.62057	0.0109665	0.559178
ENST00000372547	-1.30047	-0.506369	-2.62046	0.0109696	0.559178
ENST00000471217	-1.22703	2.57036	-2.62035	0.010973	0.559178
ENST00000509609	0.882201	1.19487	2.61998	0.0109836	0.559178
ENST00000311042	-1.45077	-0.455481	-2.62037	0.0109851	0.559178
ENST00000378588	1.08945	3.99027	2.61986	0.0109871	0.559178
ENST00000246672	-1.01754	5.96347	-2.62024	0.0109958	0.559178
ENST00000534773	-1.08818	0.621135	-2.6196	0.011025	0.559178
ENST00000548465	-1.35602	-0.880611	-2.61854	0.0110256	0.559178
ENST00000598819	-1.495	-0.735157	-2.61851	0.0110263	0.559178
ENST00000486150	-1.20712	-1.26816	-2.61828	0.0110331	0.559178
ENST00000496087	-1.41781	-1.18845	-2.61812	0.0110376	0.559178
ENST00000534322	-1.30743	-1.37769	-2.61823	0.0110427	0.559178
ENST00000636120	0.543259	3.51383	2.61891	0.0110494	0.559178
ENST00000420343	0.953006	0.750161	2.61872	0.0110522	0.559178
ENST00000600996	-1.36424	-0.984456	-2.61721	0.0110674	0.559178
ENST00000311148	-1.27674	-1.63475	-2.61695	0.011072	0.559178
ENST00000324109	-0.630741	7.02156	-2.61786	0.0110771	0.559178
ENST00000466939	1.1888	-0.944667	2.61766	0.0110771	0.559178
ENST00000380217	-1.00165	0.341854	-2.61741	0.0110858	0.559178
ENST00000559183	1.21177	0.738779	2.61646	0.0110861	0.559178
ENST00000287543	-1.05009	0.0134571	-2.61643	0.0110869	0.559178
ENST00000615794	1.34742	-1.26913	2.61748	0.0110874	0.559178
ENST00000557699	-0.658252	2.93524	-2.61641	0.0110875	0.559178
ENST00000334716	0.684958	2.85237	2.61636	0.0110889	0.559178
ENST00000647363	0.941773	0.339182	2.61719	0.0111012	0.559431
ENST00000380184	-1.44523	1.74004	-2.61557	0.0111122	0.559619
ENST00000484789	-1.28352	1.32178	-2.61429	0.0111497	0.559673
ENST00000396981	0.431641	4.1239	2.6151	0.0111621	0.559673
ENST00000415009	-1.2995	0.0192041	-2.61425	0.0111704	0.559673
ENST00000640132	-1.19274	1.65359	-2.61388	0.011189	0.559673
ENST00000565972	-1.07081	0.0149332	-2.61294	0.0111896	0.559673
ENST00000587329	-0.464159	4.3206	-2.61272	0.0111959	0.559673
ENST00000554824	0.953215	0.635853	2.61374	0.0112002	0.559673
ENST00000434469	1.1002	-0.779117	2.61229	0.0112086	0.559673
ENST00000546774	-0.881037	2.14974	-2.61193	0.0112194	0.559673
ENST00000515589	-1.11911	-1.66073	-2.6119	0.0112203	0.559673
ENST00000573896	-1.33412	1.07067	-2.61252	0.0112226	0.559673
ENST00000641219	-1.42366	2.8307	-2.61265	0.0112315	0.559673
ENST00000510876	1.03978	0.497597	2.61249	0.0112374	0.559673
ENST00000624315	0.924675	1.4661	2.61236	0.0112417	0.559673
ENST00000405515	-1.38798	-0.492075	-2.61116	0.0112423	0.559673
ENST00000359246	-0.42685	6.95676	-2.61183	0.0112496	0.559673
ENST00000580161	-1.0297	1.12139	-2.61185	0.0112516	0.559673
ENST00000472073	-1.29916	-1.55727	-2.61082	0.0112522	0.559673
ENST00000380698	0.54706	6.39221	2.61191	0.0112559	0.559673
ENST00000470951	-0.393274	6.70242	-2.61152	0.011265	0.559673
ENST00000511750	1.34646	-0.797011	2.61124	0.0112706	0.559673
ENST00000629089	0.457131	6.78944	2.61038	0.011287	0.559673
ENST00000569788	-1.04974	-0.570896	-2.61072	0.0112906	0.559673
ENST00000557246	-1.37764	-1.7249	-2.60973	0.011302	0.559673
ENST00000579913	-0.823271	4.66111	-2.60909	0.0113037	0.559673
ENST00000595376	-0.686485	4.27654	-2.60968	0.0113171	0.559673
ENST00000618284	-1.32411	-1.97437	-2.60874	0.0113365	0.559673
ENST00000567041	-1.21163	-1.37011	-2.6079	0.0113391	0.559673
ENST00000312876	-1.16971	-1.63921	-2.60851	0.0113428	0.559673
ENST00000610272	0.555755	3.64227	2.60871	0.0113493	0.559673
ENST00000618199	0.422716	4.42391	2.60721	0.0113598	0.559673
ENST00000523180	1.26644	-1.16231	2.60684	0.0113708	0.559673
ENST00000389912	0.973905	0.616521	2.60654	0.0113799	0.559673
ENST00000521316	0.8187	3.42353	2.60613	0.0113921	0.559673
ENST00000488038	-1.41788	-1.41613	-2.60635	0.011399	0.559673
ENST00000569558	-0.570006	4.4412	-2.60669	0.0114048	0.559673
ENST00000639070	-1.50371	-1.91311	-2.60527	0.0114178	0.559673
ENST00000635451	1.31895	-1.1225	2.6061	0.0114232	0.559673
ENST00000647900	0.58805	3.10661	2.60492	0.0114285	0.559673
ENST00000647901	-1.40256	-0.28486	-2.60465	0.0114366	0.559673
ENST00000521901	-0.68608	3.27319	-2.60567	0.0114371	0.559673
ENST00000334571	-1.00461	0.76244	-2.60442	0.0114434	0.559673
ENST00000479477	1.11631	1.15702	2.60434	0.0114459	0.559673
ENST00000396063	0.879914	1.3899	2.60405	0.0114547	0.559673
ENST00000517939	1.0933	-0.92147	2.60518	0.0114568	0.559673
ENST00000552813	1.12125	0.162069	2.60361	0.0114679	0.559673
ENST00000333480	-1.183	-1.91288	-2.60354	0.01147	0.559673
ENST00000564290	1.26326	-0.6006	2.60237	0.0115052	0.559673
ENST00000370409	-1.22422	-1.12661	-2.60255	0.0115106	0.559673
ENST00000320330	-0.524709	5.62968	-2.60256	0.0115203	0.559673
ENST00000548175	0.380152	5.6504	2.60306	0.0115209	0.559673
ENST00000485349	-1.32401	-0.251202	-2.60148	0.0115324	0.559673
ENST00000519955	0.833163	1.55527	2.60234	0.0115424	0.559673
ENST00000422819	-1.13636	-0.211243	-2.60111	0.0115435	0.559673
ENST00000538790	-1.22577	-0.973898	-2.60148	0.0115492	0.559673
ENST00000522515	0.820246	2.45344	2.60193	0.0115543	0.559673
ENST00000474856	-1.1092	0.0137626	-2.60071	0.0115558	0.559673
ENST00000496599	-1.39775	-0.335779	-2.60133	0.0115567	0.559673
ENST00000471995	0.670496	2.89392	2.60179	0.0115571	0.559673
ENST00000522982	-1.29404	-1.49077	-2.60051	0.0115635	0.559673
ENST00000265381	0.360748	8.66834	2.6012	0.0115778	0.559673
ENST00000583966	-1.05457	0.269339	-2.59993	0.0115794	0.559673
ENST00000393324	-1.04775	1.64425	-2.59946	0.0115937	0.559673
ENST00000468619	-0.915928	3.55331	-2.60026	0.011599	0.559673
ENST00000586003	-0.879865	2.43578	-2.59898	0.0116083	0.559673
ENST00000591493	1.02749	-1.71822	2.59881	0.0116137	0.559673
ENST00000571311	-0.473329	4.90181	-2.59891	0.0116388	0.559673
ENST00000565973	0.682698	2.98161	2.59894	0.0116439	0.559673
ENST00000564636	1.19067	-1.08232	2.59752	0.0116529	0.559673
ENST00000436922	1.19322	-0.600625	2.59736	0.0116579	0.559673
ENST00000614539	0.371393	5.79476	2.59725	0.0116613	0.559673
ENST00000477301	0.549726	2.78554	2.59817	0.0116691	0.559673
ENST00000460897	-1.1856	0.0329322	-2.59766	0.0116753	0.559673
ENST00000591120	-1.31029	-1.46953	-2.59642	0.0116867	0.559673
ENST00000596663	1.03996	1.73038	2.59743	0.0116895	0.559673
ENST00000283025	-1.44244	-0.195207	-2.59602	0.0116991	0.559673
ENST00000561686	-1.25957	0.600963	-2.59672	0.0117017	0.559673
ENST00000465463	0.473056	3.24452	2.59666	0.0117131	0.559673
ENST00000520278	-1.34638	-1.17786	-2.59524	0.0117229	0.559673
ENST00000477080	-1.11348	2.08678	-2.59626	0.011723	0.559673
ENST00000453697	-1.23857	1.37043	-2.59495	0.0117318	0.559673
ENST00000464154	1.0279	-0.229156	2.59469	0.0117398	0.559673
ENST00000341460	0.728732	2.73792	2.59556	0.0117421	0.559673
ENST00000494111	-1.67731	1.59487	-2.59451	0.0117453	0.559673
ENST00000523608	-1.2505	-2.05968	-2.59419	0.0117624	0.559673
ENST00000505184	-1.42214	-1.49637	-2.59395	0.0117628	0.559673
ENST00000549003	-1.19864	-1.81387	-2.59378	0.0117679	0.559673
ENST00000506024	1.43931	0.133669	2.59439	0.0117852	0.559673
ENST00000647456	-1.28691	-1.65183	-2.59312	0.0117884	0.559673
ENST00000316082	-1.20503	-1.85853	-2.59274	0.0118001	0.559673
ENST00000579265	-1.29013	-0.665718	-2.59269	0.0118016	0.559673
ENST00000493001	-1.17093	-1.61937	-2.59213	0.0118191	0.559673
ENST00000320393	0.60549	3.8372	2.59185	0.0118277	0.559673
ENST00000504946	-1.66072	-0.907096	-2.59172	0.0118316	0.559673
ENST00000492026	-1.17604	-0.637088	-2.59234	0.0118374	0.559673
ENST00000554047	0.634746	2.88512	2.59124	0.0118467	0.559673
ENST00000308342	-0.855295	3.61536	-2.59209	0.0118536	0.559673
ENST00000602473	-1.55518	0.484616	-2.59096	0.0118552	0.559673
ENST00000482881	1.11629	-1.08534	2.5916	0.0118688	0.559673
ENST00000399869	1.02784	2.73312	2.59048	0.0118703	0.559673
ENST00000411875	0.384866	4.71948	2.59037	0.0118736	0.559673
ENST00000578036	-0.504245	6.34701	-2.59078	0.0118839	0.559673
ENST00000437768	-1.80331	0.301196	-2.59	0.0119152	0.559673
ENST00000463031	-1.32833	-0.0121722	-2.58895	0.0119181	0.559673
ENST00000552053	-1.3213	-0.760535	-2.58882	0.0119219	0.559673
ENST00000637456	1.34524	0.324357	2.58959	0.0119292	0.559673
ENST00000602324	0.605327	3.89317	2.58915	0.0119321	0.559673
ENST00000584679	-1.33763	-1.42098	-2.58813	0.0119436	0.559673
ENST00000436639	-0.472804	5.22615	-2.58851	0.0119674	0.559673
ENST00000262999	-1.1864	-2.03521	-2.58726	0.011971	0.559673
ENST00000498205	-1.20069	-0.984433	-2.58796	0.0119727	0.559673
ENST00000562886	-0.334113	6.19117	-2.58783	0.0119831	0.559673
ENST00000324460	0.564817	8.27882	2.58806	0.0119834	0.559673
ENST00000555807	0.530181	4.2772	2.58647	0.0119956	0.559673
ENST00000559463	-1.08432	1.18444	-2.58623	0.0120032	0.559673
ENST00000454167	-1.34827	-0.978162	-2.58595	0.0120121	0.559673
ENST00000644627	-1.42398	-1.38063	-2.58554	0.0120248	0.559673
ENST00000637335	0.846417	1.31169	2.58523	0.0120347	0.559673
ENST00000573209	-1.3009	-1.3971	-2.58532	0.0120376	0.559673
ENST00000497135	-0.871774	1.7326	-2.58554	0.0120423	0.559673
ENST00000650834	-1.32543	-1.10628	-2.58495	0.0120435	0.559673
ENST00000576671	-1.31627	-1.67842	-2.58489	0.0120454	0.559673
ENST00000451919	-0.739034	2.1412	-2.58477	0.0120492	0.559673
ENST00000364310	1.29841	0.495258	2.58449	0.0120581	0.559673
ENST00000489197	-1.30917	-0.830679	-2.58442	0.0120601	0.559673
ENST00000530833	0.955985	1.07859	2.58436	0.0120623	0.559673
ENST00000488484	-1.30072	-1.45162	-2.58433	0.012063	0.559673
ENST00000542845	1.11124	-1.17106	2.58415	0.0120686	0.559673
ENST00000646865	1.03784	0.126548	2.58503	0.0120781	0.559673
ENST00000401970	1.30662	0.800158	2.58453	0.0120866	0.559673
ENST00000494833	-0.793018	2.51628	-2.5835	0.0120892	0.559673
ENST00000647660	1.31457	-0.419911	2.58397	0.0121038	0.559673
ENST00000612923	-1.35349	-1.14003	-2.58289	0.0121166	0.559673
ENST00000361418	0.731807	1.49438	2.58377	0.0121167	0.559673
ENST00000620116	-1.32246	-1.46639	-2.58206	0.012135	0.559673
ENST00000511701	1.03517	-0.339786	2.58291	0.0121462	0.559673
ENST00000647894	-1.24594	-0.917515	-2.58147	0.0121536	0.559673
ENST00000562710	-1.05545	2.44625	-2.58147	0.0121539	0.559673
ENST00000499554	1.09774	-0.974926	2.58237	0.012163	0.559673
ENST00000331803	-1.67412	-0.930506	-2.58117	0.0121631	0.559673
ENST00000614983	0.584821	2.0456	2.58196	0.0121745	0.559673
ENST00000605862	-0.42937	5.97727	-2.58063	0.0121804	0.559673
ENST00000367240	-0.621215	5.01977	-2.58045	0.0121862	0.559673
ENST00000471063	-1.41678	-0.520619	-2.58041	0.0121874	0.559673
ENST00000470588	-0.899593	2.72123	-2.58028	0.0121915	0.559673
ENST00000623591	0.74473	2.41275	2.58089	0.012202	0.559673
ENST00000255304	0.648604	1.96895	2.581	0.0122052	0.559673
ENST00000551090	-1.2099	-1.94465	-2.58009	0.0122058	0.559673
ENST00000484328	-1.19727	-0.457258	-2.58052	0.0122071	0.559673
ENST00000471405	-1.33916	-0.244593	-2.57978	0.0122074	0.559673
ENST00000465902	1.2591	0.254875	2.57943	0.0122187	0.559673
ENST00000563586	1.28716	-0.922781	2.57934	0.0122216	0.559673
ENST00000455749	0.984468	-0.209605	2.58028	0.0122264	0.559673
ENST00000450811	-1.20118	-1.7807	-2.57945	0.0122375	0.559673
ENST00000614558	0.646377	2.66321	2.57903	0.0122542	0.559673
ENST00000577326	1.06051	-1.40558	2.57849	0.0122708	0.559673
ENST00000519413	0.748606	1.59169	2.57855	0.0122844	0.559673
ENST00000527853	-1.397	0.119918	-2.57633	0.0123182	0.559673
ENST00000586932	-0.80892	2.51424	-2.57615	0.0123238	0.559673
ENST00000551722	0.766858	1.72957	2.57609	0.0123258	0.559673
ENST00000375495	0.715235	2.32729	2.57705	0.0123322	0.559673
ENST00000606225	0.743873	1.86664	2.57698	0.0123333	0.559673
ENST00000414504	1.03993	1.02432	2.57699	0.0123338	0.559673
ENST00000466970	-1.43766	-0.136299	-2.57585	0.0123391	0.559673
ENST00000401674	-1.50166	-1.40784	-2.57587	0.0123521	0.559673
ENST00000562792	1.17057	0.242404	2.57595	0.0123535	0.559673
ENST00000270691	-1.39445	-1.21055	-2.5751	0.0123578	0.559673
ENST00000546866	1.30696	-0.854327	2.5759	0.0123597	0.559673
ENST00000583290	1.16008	-1.27351	2.57485	0.0123657	0.559673
ENST00000566529	-1.62827	4.50085	-2.5758	0.0123701	0.559673
ENST00000588290	1.33641	-0.894321	2.57554	0.0123815	0.559673
ENST00000535147	-0.927913	1.03856	-2.57422	0.0123863	0.559673
ENST00000536613	-1.49441	0.046346	-2.574	0.0123935	0.559673
ENST00000198939	-1.21482	-1.68882	-2.57397	0.0123943	0.559673
ENST00000490321	0.916983	0.731255	2.57459	0.0124113	0.559673
ENST00000464367	-1.02449	0.780132	-2.57338	0.0124135	0.559673
ENST00000419362	1.20322	0.158292	2.57338	0.0124135	0.559673
ENST00000365512	-1.00103	0.240445	-2.57434	0.0124143	0.559673
ENST00000472714	-1.36438	1.41001	-2.57399	0.0124197	0.559673
ENST00000521034	-1.44519	-0.754754	-2.57412	0.0124223	0.559673
ENST00000556592	1.0242	-0.373776	2.57424	0.0124237	0.559673
ENST00000317103	-1.20202	-2.23014	-2.57254	0.0124407	0.559791
ENST00000588112	1.21556	-0.828062	2.5724	0.0124451	0.559791
ENST00000503314	-1.51068	3.88661	-2.57263	0.0124495	0.559791
ENST00000512069	0.574669	4.24663	2.57319	0.0124579	0.559791
ENST00000524295	0.507161	3.753	2.57281	0.0124699	0.559791
ENST00000449177	-1.14465	-1.97716	-2.5716	0.0124712	0.559791
ENST00000635484	-1.10475	-1.81466	-2.57143	0.012477	0.559791
ENST00000323699	0.762211	2.59059	2.57103	0.0124898	0.559891
ENST00000382422	-1.29346	-1.25993	-2.57091	0.0124941	0.559891
ENST00000466796	-1.43203	-0.81774	-2.57069	0.0125009	0.559891
ENST00000492364	0.887018	-0.396749	2.57146	0.0125122	0.560073
ENST00000413670	0.8995	5.70358	2.571	0.0125275	0.560389
ENST00000402432	1.24761	-1.64576	2.56953	0.0125389	0.560389
ENST00000287156	-1.31751	-0.844072	-2.56938	0.012545	0.560389
ENST00000548681	-1.10678	-0.472566	-2.57029	0.012549	0.560389
ENST00000609973	-0.590668	5.54697	-2.56991	0.012557	0.560389
ENST00000487270	-1.27575	-0.288446	-2.56752	0.0126048	0.560389
ENST00000591485	1.04942	0.462573	2.56798	0.0126192	0.560389
ENST00000496498	-1.31949	-1.15294	-2.56698	0.0126226	0.560389
ENST00000641687	-1.10645	0.168351	-2.56678	0.0126291	0.560389
ENST00000652035	-1.44049	-1.35368	-2.56656	0.0126365	0.560389
ENST00000644134	-1.51879	-0.551724	-2.56652	0.012639	0.560389
ENST00000338316	0.774	5.75497	2.56746	0.0126428	0.560389
ENST00000643913	0.852284	1.32995	2.56684	0.0126633	0.560389
ENST00000520564	-0.494497	5.20712	-2.56605	0.0126824	0.560389
ENST00000629277	0.385328	4.95966	2.56472	0.0126971	0.560389
ENST00000635528	-1.41612	-0.550591	-2.56551	0.0126991	0.560389
ENST00000330828	0.787128	1.8363	2.56568	0.0127041	0.560389
ENST00000645822	-1.2653	1.05385	-2.56524	0.0127069	0.560389
ENST00000462246	-1.33014	-1.4528	-2.56497	0.0127137	0.560389
ENST00000559432	-1.28036	-1.53643	-2.56459	0.0127167	0.560389
ENST00000520682	1.0564	-0.42205	2.56507	0.0127191	0.560389
ENST00000550715	-1.23025	0.036464	-2.56391	0.012724	0.560389
ENST00000582441	-1.22889	-1.38176	-2.56392	0.0127246	0.560389
ENST00000531473	1.26333	-0.799634	2.56455	0.0127318	0.560389
ENST00000523803	0.991653	0.178096	2.56356	0.0127356	0.560389
ENST00000297369	-0.73336	2.53339	-2.56413	0.0127519	0.560389
ENST00000276449	-1.19003	-1.62344	-2.5638	0.0127522	0.560389
ENST00000611093	1.31236	-0.709022	2.56296	0.0127555	0.560389
ENST00000644224	1.14553	0.299015	2.56284	0.0127593	0.560389
ENST00000538033	-0.713631	3.10335	-2.56283	0.0127596	0.560389
ENST00000558679	1.2405	-1.47994	2.56282	0.0127599	0.560389
ENST00000628823	-0.998259	2.0743	-2.56279	0.012761	0.560389
ENST00000561373	0.478233	3.69755	2.5639	0.0127626	0.560389
ENST00000577977	0.964643	0.643754	2.56364	0.0127704	0.560389
ENST00000456781	0.582832	2.26643	2.56327	0.0127836	0.560389
ENST00000527247	1.05619	-0.961092	2.56202	0.0127866	0.560389
ENST00000518190	1.02959	1.46702	2.56305	0.0127875	0.560389
ENST00000504509	1.22576	1.4811	2.56121	0.0128138	0.561216
ENST00000495341	0.798601	2.57494	2.56181	0.0128209	0.561216
ENST00000390530	-1.19871	-1.56792	-2.5607	0.0128306	0.561321
ENST00000477314	-1.17047	0.969551	-2.56071	0.0128597	0.562144
ENST00000489196	-0.497937	4.8405	-2.56067	0.0128697	0.562144
ENST00000362700	1.06544	-0.204457	2.5601	0.0128855	0.562144
ENST00000261980	-1.51177	-1.12843	-2.55878	0.0128949	0.562144
ENST00000482537	1.1215	-0.13274	2.55967	0.0129033	0.562144
ENST00000530298	-1.41455	-1.42882	-2.5585	0.0129043	0.562144
ENST00000531444	-1.148	0.489575	-2.55841	0.0129074	0.562144
ENST00000473270	0.777801	2.24013	2.55817	0.0129153	0.562144
ENST00000621592	-1.36166	-0.168327	-2.55806	0.0129191	0.562144
ENST00000465669	-1.25729	-1.19151	-2.55806	0.0129221	0.562144
ENST00000259271	-1.50009	-0.0082927	-2.55774	0.01293	0.562171
ENST00000377252	0.392598	6.63055	2.55827	0.0129501	0.562728
ENST00000502640	-1.15204	-2.09848	-2.55682	0.0129608	0.562784
ENST00000479798	0.936854	0.926189	2.55659	0.0130085	0.562784
ENST00000456173	0.7703	2.01471	2.5552	0.0130158	0.562784
ENST00000467118	0.83013	1.50334	2.55601	0.0130256	0.562784
ENST00000369787	-0.526641	6.84228	-2.55551	0.0130269	0.562784
ENST00000496353	-1.134	1.09181	-2.55442	0.0130421	0.562784
ENST00000609172	-0.981305	3.92648	-2.5551	0.0130467	0.562784
ENST00000445770	-1.34358	0.161526	-2.55426	0.0130475	0.562784
ENST00000583704	-0.821618	2.99514	-2.55421	0.0130493	0.562784
ENST00000474550	-0.948671	6.03503	-2.55511	0.0130556	0.562784
ENST00000459940	-1.06631	1.33783	-2.55381	0.0130628	0.562784
ENST00000441821	-0.894104	5.21443	-2.55409	0.0130813	0.562784
ENST00000587826	-1.18159	-2.08849	-2.55379	0.0130892	0.562784
ENST00000508399	-1.22023	-1.69671	-2.55373	0.013092	0.562784
ENST00000263754	0.428538	6.17059	2.55396	0.0130937	0.562784
ENST00000332853	-0.515481	5.72805	-2.55353	0.0131005	0.562784
ENST00000359788	0.91196	0.580024	2.55375	0.0131011	0.562784
ENST00000602898	0.336629	6.73248	2.55372	0.0131052	0.562784
ENST00000372887	-1.26611	-1.37807	-2.55244	0.0131091	0.562784
ENST00000624173	1.03752	0.620381	2.55348	0.0131126	0.562784
ENST00000496447	-0.87611	3.11795	-2.55306	0.0131241	0.562784
ENST00000636966	-0.907638	3.33427	-2.55299	0.0131244	0.562784
ENST00000474384	1.15127	-1.41419	2.5525	0.0131379	0.562784
ENST00000620364	-0.577243	7.585	-2.55257	0.013143	0.562784
ENST00000587988	-1.25098	-1.57829	-2.55131	0.0131477	0.562784
ENST00000474920	1.00024	0.529534	2.55225	0.0131515	0.562784
ENST00000460528	-1.39232	-1.09494	-2.55109	0.0131555	0.562784
ENST00000562686	-1.2114	0.116915	-2.55102	0.0131578	0.562784
ENST00000372227	-0.622623	4.09577	-2.55189	0.0131625	0.562784
ENST00000462213	0.561205	3.2731	2.5504	0.013179	0.563043
ENST00000369851	0.229506	8.42695	2.55016	0.0131872	0.563043
ENST00000508148	-1.33243	-0.778863	-2.55007	0.0131904	0.563043
ENST00000628776	-1.68651	-0.641	-2.55038	0.0132052	0.56312
ENST00000525053	0.943751	1.32636	2.5497	0.0132422	0.56312
ENST00000559184	0.917124	1.80703	2.54965	0.0132432	0.56312
ENST00000623168	-1.27561	-1.65518	-2.54848	0.0132448	0.56312
ENST00000413663	0.701089	2.40441	2.54949	0.0132474	0.56312
ENST00000619812	-1.67451	-0.634038	-2.54901	0.0132484	0.56312
ENST00000508488	0.648951	2.1905	2.54933	0.0132543	0.56312
ENST00000577870	-0.93873	1.57364	-2.549	0.01326	0.56312
ENST00000491240	-1.28789	-0.700716	-2.5479	0.0132648	0.56312
ENST00000485174	-1.39696	-0.86082	-2.54671	0.0133056	0.56312
ENST00000451839	1.17474	-0.396836	2.54744	0.0133157	0.56312
ENST00000432735	1.15877	-0.878742	2.54726	0.0133235	0.56312
ENST00000492147	0.526464	4.37754	2.54702	0.0133251	0.56312
ENST00000369295	1.01819	2.58575	2.54675	0.0133405	0.56312
ENST00000399232	-0.415911	7.60128	-2.54667	0.0133443	0.56312
ENST00000565737	1.18931	1.2134	2.54554	0.0133463	0.56312
ENST00000483951	-1.56904	-0.601036	-2.54572	0.0133471	0.56312
ENST00000362585	0.986478	0.71705	2.54645	0.0133526	0.56312
ENST00000446628	-1.29791	-1.21294	-2.54527	0.0133555	0.56312
ENST00000472164	1.0526	-0.939868	2.54507	0.0133624	0.56312
ENST00000620584	-1.56985	1.89797	-2.54551	0.0133713	0.56312
ENST00000426698	-1.27622	-1.4134	-2.54455	0.0133804	0.56312
ENST00000447986	-0.918072	1.53816	-2.54437	0.0133867	0.56312
ENST00000512489	1.10634	-0.044797	2.54541	0.0133907	0.56312
ENST00000489548	-0.922658	0.768506	-2.54405	0.0133978	0.56312
ENST00000412228	-0.644661	3.72317	-2.54404	0.0133981	0.56312
ENST00000506077	-1.1667	-1.90329	-2.54444	0.0134027	0.56312
ENST00000608912	-1.29572	-0.368508	-2.54364	0.0134123	0.56312
ENST00000486650	0.549822	3.87825	2.54356	0.013415	0.56312
ENST00000550329	-0.753223	2.01331	-2.54347	0.0134179	0.56312
ENST00000649558	-1.17329	-1.16616	-2.54349	0.0134276	0.56312
ENST00000541983	-1.14656	-1.75653	-2.54298	0.0134352	0.56312
ENST00000495375	-1.41314	-1.29293	-2.54295	0.0134419	0.56312
ENST00000525742	-1.20176	-1.75834	-2.54246	0.0134586	0.56312
ENST00000636752	-1.57213	-0.428062	-2.54325	0.0134605	0.56312
ENST00000649434	0.92583	1.00441	2.54192	0.0134722	0.56312
ENST00000509557	-1.06658	1.78036	-2.54278	0.0134733	0.56312
ENST00000575842	-1.14359	-1.86209	-2.54175	0.0134781	0.56312
ENST00000486510	-1.22468	-1.45769	-2.54123	0.0134962	0.56312
ENST00000458377	-1.18772	0.942486	-2.54119	0.0134975	0.56312
ENST00000537935	-1.40463	-0.983689	-2.54077	0.0135122	0.56312
ENST00000507359	-0.770355	3.57013	-2.5417	0.0135196	0.56312
ENST00000560050	0.672999	3.05472	2.54123	0.013529	0.56312
ENST00000402714	-0.558322	5.67005	-2.54117	0.0135351	0.56312
ENST00000533394	0.645704	1.52859	2.54003	0.0135383	0.56312
ENST00000339475	-1.8671	4.87081	-2.5411	0.0135384	0.56312
ENST00000502832	1.02484	1.42921	2.5407	0.0135523	0.56312
ENST00000605608	-0.705844	3.12074	-2.54062	0.0135541	0.56312
ENST00000580496	-0.411316	5.21866	-2.54051	0.013556	0.56312
ENST00000650271	-1.28336	-1.45898	-2.53894	0.0135763	0.56312
ENST00000456969	-1.29026	-1.12141	-2.53918	0.013583	0.56312
ENST00000439256	-1.35456	0.167094	-2.53936	0.0135856	0.56312
ENST00000618019	0.825225	2.8956	2.53972	0.0135879	0.56312
ENST00000388996	0.793794	2.09069	2.53838	0.0135961	0.56312
ENST00000515731	0.532489	2.54676	2.53916	0.0136024	0.56312
ENST00000614733	0.921111	-0.71922	2.53914	0.0136074	0.56312
ENST00000466096	-0.507088	5.81969	-2.53853	0.0136074	0.56312
ENST00000440009	1.01178	0.514004	2.53751	0.0136267	0.563306
ENST00000381440	0.819095	4.092	2.53831	0.0136267	0.563306
ENST00000422972	1.20532	-0.805129	2.53814	0.013637	0.563306
ENST00000504466	-0.909976	1.34943	-2.53824	0.0136411	0.563306
ENST00000341785	-1.21263	3.11471	-2.53743	0.0136669	0.56392
ENST00000377401	-1.23928	-0.332379	-2.53627	0.0136705	0.56392
ENST00000475463	0.50221	3.28379	2.5365	0.0137031	0.564108
ENST00000516707	1.04397	0.455184	2.5364	0.013704	0.564108
ENST00000620483	-1.3201	-0.786578	-2.53604	0.013704	0.564108
ENST00000406438	0.264705	7.09123	2.53579	0.0137177	0.564108
ENST00000577483	0.521029	3.16095	2.53561	0.0137284	0.564108
ENST00000485998	-1.32279	-1.23903	-2.53523	0.0137297	0.564108
ENST00000504799	-1.29756	-1.8009	-2.5354	0.0137299	0.564108
ENST00000261937	-1.38445	-0.0569336	-2.5345	0.0137335	0.564108
ENST00000529220	0.910217	1.11446	2.53539	0.0137424	0.564109
ENST00000482415	-0.530825	3.22734	-2.53468	0.0137611	0.564109
ENST00000363948	-2.08356	2.62125	-2.53426	0.0137788	0.564109
ENST00000648702	-1.46712	0.356009	-2.53306	0.0137845	0.564109
ENST00000625094	0.744227	2.00342	2.53386	0.0137883	0.564109
ENST00000463091	-1.21895	-2.03158	-2.53295	0.0137885	0.564109
ENST00000513115	-0.590583	3.20826	-2.53385	0.0137935	0.564109
ENST00000433040	-1.43761	-1.52972	-2.53228	0.0138123	0.564109
ENST00000616668	0.889035	0.743754	2.53333	0.0138132	0.564109
ENST00000446354	-1.24567	-1.46146	-2.53234	0.013817	0.564109
ENST00000429440	-0.424818	4.92641	-2.53295	0.0138234	0.564109
ENST00000559321	-1.9667	1.2704	-2.53279	0.0138273	0.564109
ENST00000412270	0.945043	0.73686	2.5328	0.0138283	0.564109
ENST00000527209	-1.04812	1.30077	-2.53156	0.0138381	0.56421
ENST00000508070	-1.33507	-1.61878	-2.53049	0.0138787	0.5651
ENST00000474511	-1.20147	0.186813	-2.53094	0.0138799	0.5651
ENST00000406185	-1.28895	-1.56521	-2.53063	0.0138819	0.5651
ENST00000305494	0.306777	5.64727	2.5308	0.0138975	0.565436
ENST00000435159	0.602023	6.44734	2.53072	0.0139075	0.565549
ENST00000356840	0.656638	2.30964	2.53044	0.013918	0.565579
ENST00000567707	-1.32879	-0.785841	-2.52942	0.0139289	0.565579
ENST00000544718	-1.25469	-0.756888	-2.52919	0.0139302	0.565579
ENST00000643780	0.32001	5.34811	2.52819	0.013959	0.566237
ENST00000579796	-1.36015	-0.177456	-2.52814	0.0139611	0.566237
ENST00000493880	1.05762	0.0640596	2.52846	0.0139903	0.567125
ENST00000563747	-0.960203	2.17078	-2.5276	0.0140035	0.567223
ENST00000517238	-1.3814	1.21409	-2.52741	0.0140074	0.567223
ENST00000463135	-1.08463	1.17202	-2.52656	0.0140181	0.56736
ENST00000600154	-1.33697	0.332235	-2.52643	0.0140304	0.567559
ENST00000459780	-1.69755	-0.54357	-2.52521	0.0140669	0.56874
ENST00000505393	-1.23393	-1.56568	-2.52546	0.0140828	0.568803
ENST00000623685	0.998104	-1.41171	2.52573	0.0140857	0.568803
ENST00000478418	0.394268	5.70208	2.52564	0.0140915	0.568803
ENST00000590577	1.26948	-0.837981	2.52422	0.0141031	0.568803
ENST00000540012	-1.13749	-0.637331	-2.52485	0.0141053	0.568803
ENST00000526787	-0.657318	4.06577	-2.52435	0.0141283	0.569184
ENST00000445174	0.933849	1.26008	2.52349	0.0141295	0.569184
ENST00000536684	1.64547	1.58272	2.52268	0.014159	0.570075
ENST00000509293	-0.734582	3.37713	-2.52271	0.0141848	0.57009
ENST00000584034	0.526504	3.37431	2.52303	0.0141866	0.57009
ENST00000645471	-1.2698	-1.50079	-2.52146	0.0142037	0.57009
ENST00000617808	-1.22304	-1.44441	-2.52145	0.0142042	0.57009
ENST00000475102	1.1026	-1.03631	2.52143	0.0142049	0.57009
ENST00000495348	-1.24718	-0.172748	-2.52176	0.0142107	0.57009
ENST00000290341	-1.23734	-1.85467	-2.52117	0.0142144	0.57009
ENST00000482728	-1.25926	-1.48809	-2.52018	0.0142506	0.57009
ENST00000272433	-1.16786	-0.815888	-2.52075	0.0142527	0.57009
ENST00000589859	0.725217	2.48933	2.52009	0.0142537	0.57009
ENST00000312033	0.886398	1.88001	2.52006	0.0142549	0.57009
ENST00000559374	-0.867066	2.07817	-2.5208	0.0142597	0.57009
ENST00000586770	-1.16854	0.739806	-2.51989	0.0142614	0.57009
ENST00000540088	1.48074	-0.237163	2.51978	0.0142652	0.57009
ENST00000617117	0.742749	2.63798	2.5205	0.0142781	0.57009
ENST00000262768	-0.632074	4.70885	-2.52012	0.0142781	0.57009
ENST00000352410	-0.735194	1.93688	-2.5189	0.0142978	0.57009
ENST00000508624	-0.634914	3.8846	-2.51975	0.0143071	0.57009
ENST00000534859	-1.17205	-1.69202	-2.51901	0.0143156	0.57009
ENST00000512995	-0.84995	1.48585	-2.51811	0.0143269	0.57009
ENST00000470022	-1.30073	0.784406	-2.51878	0.0143359	0.57009
ENST00000463948	-1.2795	-1.50776	-2.5184	0.0143522	0.57009
ENST00000312184	-1.07405	0.961321	-2.51719	0.0143609	0.57009
ENST00000487467	-0.914979	1.71716	-2.51697	0.0143691	0.57009
ENST00000378088	-1.21471	-0.878854	-2.51666	0.0143803	0.57009
ENST00000558106	-1.16704	0.542362	-2.51664	0.0143812	0.57009
ENST00000460831	-0.669091	2.26267	-2.51657	0.0143839	0.57009
ENST00000622285	0.860195	2.10094	2.51723	0.0143977	0.57009
ENST00000515506	0.823512	1.28495	2.51659	0.0143978	0.57009
ENST00000482540	-0.586537	2.36642	-2.51717	0.0144024	0.57009
ENST00000650099	-1.31276	-1.29022	-2.51588	0.0144119	0.57009
ENST00000493194	1.13562	-1.42857	2.51659	0.0144205	0.57009
ENST00000426213	1.17202	-1.83071	2.51536	0.0144286	0.57009
ENST00000598163	1.13339	-1.77475	2.5153	0.014431	0.57009
ENST00000374342	-1.20916	-1.55104	-2.51514	0.0144367	0.57009
ENST00000542698	0.434238	4.37158	2.51602	0.014443	0.57009
ENST00000479284	-0.61422	7.26176	-2.51559	0.0144498	0.57009
ENST00000532683	-0.371474	6.87397	-2.51437	0.0144656	0.57009
ENST00000601664	-1.06781	0.811	-2.51379	0.0144871	0.57009
ENST00000537625	-1.16261	-0.766963	-2.5144	0.014493	0.57009
ENST00000650006	1.11183	-0.832054	2.51333	0.0145042	0.57009
ENST00000535345	0.986631	-0.909115	2.51274	0.0145262	0.57009
ENST00000303221	0.540859	3.6008	2.51379	0.0145286	0.57009
ENST00000483082	-1.1844	-1.50409	-2.51347	0.0145304	0.57009
ENST00000557852	1.09913	1.29669	2.51361	0.0145337	0.57009
ENST00000568436	0.987994	0.568975	2.51253	0.014534	0.57009
ENST00000489870	0.674944	2.43692	2.51246	0.0145368	0.57009
ENST00000565777	-1.17481	0.68102	-2.5127	0.0145421	0.57009
ENST00000564041	1.04749	-1.77169	2.51289	0.0145483	0.57009
ENST00000495107	-0.821379	2.66575	-2.51284	0.0145528	0.57009
ENST00000612517	-1.21838	0.141322	-2.51122	0.014583	0.57009
ENST00000651281	0.762789	1.19061	2.51187	0.0145991	0.57009
ENST00000615251	0.716877	2.15118	2.51062	0.0146057	0.57009
ENST00000424872	-1.31276	-1.75356	-2.51053	0.0146089	0.57009
ENST00000596580	0.525876	7.3859	2.51149	0.0146135	0.57009
ENST00000398868	0.60479	4.88352	2.51122	0.0146197	0.57009
ENST00000295228	0.870393	3.46073	2.51121	0.0146228	0.57009
ENST00000483199	-1.22289	-0.479312	-2.50975	0.0146382	0.57009
ENST00000648917	-0.727628	4.39235	-2.51031	0.014654	0.57009
ENST00000389602	-1.18925	-1.67139	-2.50922	0.0146582	0.57009
ENST00000521978	0.778725	1.18957	2.51	0.0146705	0.57009
ENST00000650441	-1.34675	1.07129	-2.50937	0.0146842	0.57009
ENST00000463082	-1.3824	-1.47129	-2.50832	0.0146923	0.57009
ENST00000535599	-1.24198	-1.09041	-2.50829	0.0146933	0.57009
ENST00000262160	0.249884	7.31968	2.50828	0.0146938	0.57009
ENST00000548958	0.382655	5.11703	2.50897	0.0146993	0.57009
ENST00000636395	-0.739627	3.70333	-2.50769	0.0147159	0.57009
ENST00000511368	-1.41945	-1.76226	-2.50725	0.0147328	0.57009
ENST00000477199	-1.30386	-0.75076	-2.50657	0.0147583	0.57009
ENST00000623235	-1.2434	-1.66448	-2.50657	0.0147583	0.57009
ENST00000365147	1.21471	-0.363867	2.50766	0.0147584	0.57009
ENST00000237281	0.294369	7.08287	2.50743	0.0147668	0.57009
ENST00000578709	-1.24695	-1.8352	-2.50639	0.0147716	0.57009
ENST00000437715	0.873324	0.291982	2.50695	0.0147844	0.57009
ENST00000621778	1.25623	0.0325494	2.50575	0.0147897	0.57009
ENST00000583199	-1.19785	-2.00216	-2.50628	0.014793	0.57009
ENST00000536249	-1.27156	-0.623754	-2.50566	0.0147931	0.57009
ENST00000578727	-1.56268	-0.870999	-2.50561	0.0147949	0.57009
[truncated: 75,306 more rows]

## Sheet: D
Transcript analysis of Non-neurons in BD vs Controls using limma
	logFC	AveExpr	t	P.Value	adj.P.Val
ENST00000529428	1.40305	3.53894	5.21293	1.68787e-06	0.124001
ENST00000562489	2.21491	-0.777221	4.57633	1.91494e-05	0.625962
ENST00000548830	2.3223	-0.522467	4.49801	2.55613e-05	0.625962
ENST00000592610	1.71374	1.96776	4.41675	3.49109e-05	0.641191
ENST00000527246	-2.33767	-0.0902447	-4.28627	5.58e-05	0.811008
ENST00000368232	-1.29667	4.32167	-4.23488	6.62354e-05	0.811008
ENST00000363013	2.48023	0.883665	4.12345	9.93033e-05	0.870972
ENST00000565195	-2.38318	1.16856	-4.10866	0.000103486	0.870972
ENST00000486170	1.40317	3.10683	4.10322	0.000106699	0.870972
ENST00000485931	0.915261	5.22086	4.03948	0.000131759	0.898291
ENST00000571442	2.04384	-1.28365	4.00441	0.000150394	0.898291
ENST00000435541	-2.28091	-0.952918	-3.98718	0.000157923	0.898291
ENST00000361924	2.02404	-0.887759	3.9822	0.000160657	0.898291
ENST00000577163	1.32993	1.50027	3.93137	0.000191324	0.898291
ENST00000512441	1.82692	-0.31568	3.91921	0.000201389	0.898291
ENST00000362280	-2.18614	0.181173	-3.89682	0.000215289	0.898291
ENST00000459723	1.61104	0.862446	3.89028	0.000222145	0.898291
ENST00000637750	2.01559	-0.0365461	3.85509	0.000248091	0.898291
ENST00000299413	-0.662242	10.5094	-3.83723	0.000263537	0.898291
ENST00000543278	1.88643	-0.77024	3.81449	0.000287161	0.898291
ENST00000448589	1.98932	0.117743	3.81264	0.000288951	0.898291
ENST00000555253	-2.18542	1.0673	-3.76375	0.000340257	0.898291
ENST00000638429	-1.89786	-0.288418	-3.7601	0.000341495	0.898291
ENST00000348340	-1.98168	-1.47642	-3.74474	0.000359452	0.898291
ENST00000631520	1.87989	0.679963	3.73329	0.000376304	0.898291
ENST00000515169	1.53326	-0.931451	3.73056	0.000376829	0.898291
ENST00000596138	-1.68584	1.94199	-3.73296	0.000376861	0.898291
ENST00000490351	-1.98725	-0.684162	-3.7264	0.000382074	0.898291
ENST00000650868	2.3752	1.38701	3.71895	0.000391647	0.898291
ENST00000548588	-1.7172	1.60883	-3.71892	0.000394852	0.898291
ENST00000456222	1.88497	-1.08414	3.71781	0.000396445	0.898291
ENST00000539983	-1.97464	-0.818758	-3.71188	0.000400942	0.898291
ENST00000495054	-2.0227	-0.23037	-3.69729	0.000420801	0.898291
ENST00000503148	1.71331	-1.014	3.67671	0.000450392	0.898291
ENST00000497421	1.84704	-0.889463	3.67626	0.000454606	0.898291
ENST00000420118	-1.89219	1.32093	-3.66844	0.000462844	0.898291
ENST00000578830	-2.0438	1.25933	-3.66163	0.000473342	0.898291
ENST00000525355	1.84335	-0.631911	3.65881	0.000477753	0.898291
ENST00000505860	1.83056	-1.39492	3.65261	0.00048759	0.898291
ENST00000251871	1.78339	-0.692188	3.64709	0.000496494	0.898291
ENST00000569186	1.93638	-0.27687	3.64415	0.000501319	0.898291
ENST00000557260	1.72846	0.358596	3.62829	0.00052805	0.923661
ENST00000424242	1.52763	0.368367	3.62066	0.000545268	0.928163
ENST00000432348	1.86136	-0.459828	3.61138	0.000558057	0.928163
ENST00000431811	1.721	-1.52667	3.60569	0.000568526	0.928163
ENST00000510524	1.60224	0.317424	3.57356	0.000635802	0.991259
ENST00000516687	1.04907	1.60186	3.56921	0.000644434	0.991259
ENST00000441136	1.38003	0.695592	3.56474	0.000649442	0.991259
ENST00000522799	1.97713	-0.700642	3.53646	0.000716605	0.991259
ENST00000607942	1.92933	-1.16896	3.52573	0.000736615	0.991259
ENST00000590875	1.77624	-0.772947	3.5168	0.000758075	0.991259
ENST00000507145	2.04756	-1.3081	3.51605	0.000765033	0.991259
ENST00000623265	-2.14331	0.550374	-3.51492	0.000767677	0.991259
ENST00000444067	-1.04469	7.90524	-3.50582	0.000785278	0.991259
ENST00000643711	-2.06384	2.25328	-3.48684	0.000834501	0.991259
ENST00000645758	1.49337	-0.0401954	3.48819	0.000835784	0.991259
ENST00000246104	1.79818	-1.09181	3.48602	0.000836668	0.991259
ENST00000618939	-1.67622	2.46053	-3.46614	0.000891484	0.991259
ENST00000502915	1.9498	0.69397	3.46138	0.000905096	0.991259
ENST00000515866	1.66072	-0.851393	3.46263	0.000907459	0.991259
ENST00000422178	1.89102	-1.04232	3.45733	0.000916832	0.991259
ENST00000551214	-1.45483	2.53977	-3.45332	0.000928603	0.991259
ENST00000549223	1.82814	-1.07017	3.44754	0.000945811	0.991259
ENST00000519741	1.98235	-1.82073	3.43768	0.000975877	0.991259
ENST00000436407	1.94519	3.35926	3.43176	0.00100068	0.991259
ENST00000623719	0.538646	5.29297	3.42735	0.00101434	0.991259
ENST00000488060	-0.788838	5.49379	-3.42367	0.00102015	0.991259
ENST00000425841	1.59418	0.294407	3.42137	0.00102757	0.991259
ENST00000642070	1.43877	0.952424	3.41941	0.00103397	0.991259
ENST00000650312	1.76719	-0.554002	3.40217	0.00109178	0.991259
ENST00000587359	1.57907	-1.5585	3.40337	0.00109445	0.991259
ENST00000379188	-1.65525	0.229025	-3.40088	0.00110134	0.991259
ENST00000469356	-0.831798	5.77818	-3.40131	0.00110156	0.991259
ENST00000413911	-1.20343	3.30771	-3.39402	0.001127	0.991259
ENST00000547619	-1.44962	2.89458	-3.39239	0.0011326	0.991259
ENST00000620662	0.995918	3.83425	3.38929	0.00113694	0.991259
ENST00000419952	1.69194	-0.201937	3.38822	0.00114075	0.991259
ENST00000556335	1.8199	-0.327857	3.3875	0.00115036	0.991259
ENST00000563486	1.4814	0.378251	3.37936	0.00117294	0.991259
ENST00000450157	1.45023	-0.10912	3.37496	0.00119606	0.991259
ENST00000512462	1.87308	-1.69235	3.37288	0.00119703	0.991259
ENST00000650025	1.14888	1.69807	3.36244	0.00123682	0.991259
ENST00000441989	1.12013	1.66807	3.36276	0.00124248	0.991259
ENST00000624773	-2.11343	-0.274727	-3.35889	0.00125062	0.991259
ENST00000625074	1.5931	-0.869011	3.3556	0.00127064	0.991259
ENST00000483634	0.884625	2.92681	3.34732	0.00129663	0.991259
ENST00000586611	1.38897	3.54224	3.34432	0.00130883	0.991259
ENST00000583731	1.47315	0.242508	3.34418	0.0013094	0.991259
ENST00000339399	-0.792408	7.38696	-3.34196	0.00131849	0.991259
ENST00000639318	2.01486	-1.56482	3.33609	0.00134283	0.991259
ENST00000517996	0.806182	3.30285	3.33516	0.00135418	0.991259
ENST00000267812	-0.735976	7.82304	-3.33022	0.00136755	0.991259
ENST00000510997	0.967692	3.13805	3.32737	0.00138759	0.991259
ENST00000481117	-1.97705	-0.811249	-3.32156	0.00141219	0.991259
ENST00000464953	1.25347	0.888591	3.31965	0.00141323	0.991259
ENST00000535559	1.74858	-1.54227	3.31572	0.00143058	0.991259
ENST00000591729	1.67128	-1.68317	3.31533	0.0014323	0.991259
ENST00000619504	1.77558	-1.25493	3.31381	0.00143909	0.991259
ENST00000526951	-1.84225	-0.384341	-3.31548	0.00143915	0.991259
ENST00000636679	1.77191	-1.13395	3.30835	0.00146364	0.991259
ENST00000505013	1.62151	-1.60342	3.30904	0.00146882	0.991259
ENST00000525692	-1.64456	-1.06796	-3.30833	0.00147127	0.991259
ENST00000550356	-2.00405	-0.145758	-3.30325	0.00149412	0.991259
ENST00000471772	1.79431	-1.27683	3.29376	0.0015396	0.991259
ENST00000359523	1.22125	1.19428	3.29182	0.00154041	0.991259
ENST00000641161	1.85922	-0.938685	3.29149	0.00154198	0.991259
ENST00000424884	1.72729	-1.53237	3.29299	0.0015434	0.991259
ENST00000389120	-0.580408	8.18484	-3.28514	0.00157249	0.991259
ENST00000573267	-2.07693	0.352008	-3.28638	0.00157349	0.991259
ENST00000636512	1.7989	-1.57613	3.27394	0.00162772	0.991259
ENST00000478772	2.30242	-0.680069	3.27187	0.00163809	0.991259
ENST00000608229	1.74118	0.187432	3.26736	0.00166999	0.991259
ENST00000590834	1.23608	1.11872	3.26018	0.00169803	0.991259
ENST00000460829	-0.924433	3.04904	-3.26173	0.00169907	0.991259
ENST00000524237	-1.58427	1.87915	-3.25865	0.00170604	0.991259
ENST00000509987	1.59718	-0.633701	3.2577	0.00171099	0.991259
ENST00000437587	-2.15651	0.912017	-3.25833	0.0017168	0.991259
ENST00000559863	-1.91837	-0.564902	-3.25462	0.00172728	0.991259
ENST00000442173	1.67154	-0.950369	3.25331	0.00173419	0.991259
ENST00000584675	-1.73324	-0.944816	-3.25281	0.00173688	0.991259
ENST00000552924	-1.80902	-0.785477	-3.25249	0.00174772	0.991259
ENST00000561119	-1.35835	2.5173	-3.25055	0.00174896	0.991259
ENST00000498813	1.85928	-1.02291	3.24881	0.0017583	0.991259
ENST00000649410	1.71649	-0.433725	3.24879	0.00175839	0.991259
ENST00000564791	0.656725	4.17837	3.24768	0.0017644	0.991259
ENST00000462546	0.761077	4.93414	3.24619	0.00177244	0.991259
ENST00000641484	0.716901	3.14167	3.24393	0.00178475	0.991259
ENST00000190611	1.39761	2.08406	3.23819	0.00182571	0.991259
ENST00000560126	1.51451	0.616825	3.2344	0.00183752	0.991259
ENST00000527582	1.38817	0.186769	3.23174	0.00185253	0.991259
ENST00000257414	0.825058	3.80768	3.22812	0.00188273	0.991259
ENST00000481183	1.36373	-0.0357172	3.22236	0.00190628	0.991259
ENST00000475109	-1.18269	2.10199	-3.21425	0.00196318	0.991259
ENST00000598813	-1.0116	3.69745	-3.214	0.00196553	0.991259
ENST00000457174	1.63431	-0.925445	3.20795	0.00199179	0.991259
ENST00000441493	-0.556305	8.58415	-3.20747	0.00199468	0.991259
ENST00000344293	-0.536142	7.22855	-3.2075	0.00200452	0.991259
ENST00000636222	-0.727742	5.393	-3.20546	0.00200694	0.991259
ENST00000483237	1.55721	-0.805341	3.20381	0.00201701	0.991259
ENST00000442065	-1.78684	-1.51767	-3.20319	0.0020208	0.991259
ENST00000463428	0.959265	3.15902	3.20155	0.00203088	0.991259
ENST00000601966	1.65169	-0.173225	3.19384	0.00207898	0.991259
ENST00000342016	-0.858199	6.43071	-3.19311	0.00208357	0.991259
ENST00000364478	1.68711	0.167121	3.18929	0.0021175	0.991259
ENST00000469232	1.35283	1.75431	3.1846	0.00213798	0.991259
ENST00000555428	-1.81394	-0.886176	-3.18341	0.00214568	0.991259
ENST00000244906	-2.0118	0.89964	-3.18321	0.00214699	0.991259
ENST00000641433	0.91834	2.88803	3.18457	0.00214869	0.991259
ENST00000472505	-1.8369	-1.17738	-3.17853	0.00217757	0.991259
ENST00000477078	0.880507	2.70334	3.17797	0.00218126	0.991259
ENST00000445039	1.78103	-0.601364	3.17706	0.00219812	0.991259
ENST00000619775	0.836168	3.82991	3.17225	0.00221924	0.991259
ENST00000499624	0.465717	9.52991	3.17252	0.0022277	0.991259
ENST00000608018	1.77523	-0.300953	3.17063	0.00223013	0.991259
ENST00000517107	1.59025	-1.29165	3.16699	0.00225478	0.991259
ENST00000431034	1.18412	1.16246	3.16565	0.00226389	0.991259
ENST00000518695	0.726936	3.33766	3.16619	0.002271	0.991259
ENST00000557805	1.31994	0.357617	3.16149	0.0023036	0.991259
ENST00000511386	1.74614	-1.35782	3.14336	0.00242091	0.991259
ENST00000454117	1.6909	-1.64488	3.13642	0.00247188	0.991259
ENST00000419225	-1.9414	0.710298	-3.1359	0.00247568	0.991259
ENST00000519589	-1.81534	0.23702	-3.1319	0.00250552	0.991259
ENST00000587805	1.10558	1.91777	3.13251	0.0025119	0.991259
ENST00000363480	1.62478	-0.478973	3.12915	0.00252629	0.991259
ENST00000363723	1.68935	2.46879	3.13003	0.00253094	0.991259
ENST00000263635	-0.467647	10.3833	-3.12569	0.00255258	0.991259
ENST00000393667	-1.94569	-0.244762	-3.12693	0.00255455	0.991259
ENST00000581178	1.81438	-0.157678	3.1267	0.00255676	0.991259
ENST00000644824	1.41141	0.0534149	3.11238	0.00265609	0.991259
ENST00000553282	1.09944	0.715517	3.11159	0.00266237	0.991259
ENST00000607680	1.31385	1.39457	3.11143	0.00267526	0.991259
ENST00000619312	1.55294	-0.731205	3.10944	0.00269182	0.991259
ENST00000592622	1.57837	-0.914167	3.10894	0.00269566	0.991259
ENST00000428044	1.66603	-1.64276	3.10676	0.00270101	0.991259
ENST00000464308	-1.95753	-0.163163	-3.1057	0.00272139	0.991259
ENST00000504012	1.51267	-1.00444	3.10202	0.00273938	0.991259
ENST00000475432	1.2142	4.3439	3.10173	0.00275423	0.991259
ENST00000264515	-1.5687	1.28947	-3.10071	0.00276165	0.991259
ENST00000316534	1.76801	-1.00428	3.09615	0.00278765	0.991259
ENST00000439886	-1.7571	0.0802642	-3.09506	0.00279672	0.991259
ENST00000614643	1.28844	0.5452	3.09462	0.00280038	0.991259
ENST00000466990	1.0284	3.10485	3.09312	0.00281284	0.991259
ENST00000340177	1.68575	-1.19216	3.0929	0.00282738	0.991259
ENST00000498607	0.848265	3.02761	3.09275	0.00282765	0.991259
ENST00000485941	0.830935	3.0224	3.08761	0.00285927	0.991259
ENST00000421048	1.72536	-1.36848	3.08883	0.00286177	0.991259
ENST00000479120	1.55139	-1.03443	3.0871	0.0028636	0.991259
ENST00000617492	1.23246	0.23364	3.0868	0.00287873	0.991259
ENST00000493072	-1.6546	-1.36671	-3.08592	0.00288626	0.991259
ENST00000511717	-1.61344	-1.38337	-3.08501	0.00289332	0.991259
ENST00000559321	1.92196	-1.78496	3.08161	0.00291062	0.991259
ENST00000505261	1.26511	0.686319	3.08219	0.00291784	0.991259
ENST00000615419	1.23021	0.919161	3.08004	0.00292421	0.991259
ENST00000471373	0.875431	2.60062	3.08004	0.00292423	0.991259
ENST00000646363	1.1148	1.56904	3.08036	0.00293395	0.991259
ENST00000471000	1.37145	-0.155014	3.08009	0.0029364	0.991259
ENST00000612590	1.80546	0.247825	3.07775	0.00294414	0.991259
ENST00000549974	1.35056	0.106473	3.07466	0.00297117	0.991259
ENST00000412107	0.895552	2.10234	3.07406	0.00297644	0.991259
ENST00000532691	1.04053	2.09649	3.07281	0.00298753	0.991259
ENST00000494387	1.59741	-0.330208	3.07263	0.00298913	0.991259
ENST00000340634	1.72847	-0.391103	3.06855	0.00303875	0.991259
ENST00000649068	-1.39458	0.748788	-3.06646	0.00305671	0.991259
ENST00000479490	-1.74244	-0.364426	-3.06402	0.0030662	0.991259
ENST00000547862	-1.58308	0.549603	-3.0636	0.00306998	0.991259
ENST00000636158	1.30289	0.277353	3.06139	0.00310278	0.991259
ENST00000553642	1.13981	1.30372	3.06005	0.00311573	0.991259
ENST00000586510	1.64414	-0.942972	3.05668	0.00313331	0.991259
ENST00000454704	1.53338	0.0595395	3.0557	0.00314243	0.991259
ENST00000436391	-1.61894	-1.53529	-3.05508	0.00314816	0.991259
ENST00000597411	-1.78626	-0.295011	-3.05479	0.00315088	0.991259
ENST00000284425	1.44395	3.64951	3.05472	0.00315148	0.991259
ENST00000287543	-1.77996	-0.163318	-3.05413	0.00315695	0.991259
ENST00000532530	1.40015	0.737628	3.05296	0.00318153	0.991259
ENST00000486007	1.42962	-0.422605	3.0493	0.00320223	0.991259
ENST00000554097	1.05252	1.44412	3.05	0.00320846	0.991259
ENST00000606351	0.925289	3.05419	3.0488	0.00322055	0.991259
ENST00000295206	-1.599	3.11422	-3.04709	0.00322319	0.991259
ENST00000601506	-1.84389	0.710689	-3.04682	0.00322575	0.991259
ENST00000484353	1.18644	1.08036	3.04782	0.00322967	0.991259
ENST00000384622	1.28278	-0.0142175	3.04704	0.00323713	0.991259
ENST00000600437	1.63802	-1.78949	3.04484	0.00324458	0.991259
ENST00000363502	1.34509	-0.256281	3.04522	0.00325427	0.991259
ENST00000301194	-1.68342	-1.19827	-3.04336	0.00325875	0.991259
ENST00000382952	-1.86714	-1.34675	-3.04357	0.00326979	0.991259
ENST00000479009	-1.44866	1.9376	-3.04018	0.00328936	0.991259
ENST00000493307	1.73569	-1.58627	3.03947	0.00331034	0.991259
ENST00000542509	-1.68033	2.65494	-3.03394	0.00335021	0.991259
ENST00000648498	1.93807	2.24844	3.03357	0.00335389	0.991259
ENST00000596032	-1.51673	-0.990488	-3.03303	0.00335913	0.991259
ENST00000594077	1.48796	0.148096	3.02938	0.00339535	0.991259
ENST00000342680	1.02765	1.62804	3.02902	0.00339895	0.991259
ENST00000588417	0.966218	1.87778	3.02592	0.00342992	0.991259
ENST00000588072	0.831448	2.29183	3.02514	0.00343784	0.991259
ENST00000531505	0.880309	2.3556	3.02282	0.00346122	0.991259
ENST00000567827	1.67828	-1.15995	3.02246	0.00346491	0.991259
ENST00000652340	1.30691	0.0494115	3.02154	0.00348724	0.991259
ENST00000363948	1.68227	-0.411525	3.01847	0.00350563	0.991259
ENST00000493903	-1.22042	2.05701	-3.01763	0.00351428	0.991259
ENST00000551044	-1.89982	-1.09803	-3.01561	0.00354901	0.991259
ENST00000578280	-2.02463	0.288156	-3.01282	0.00356401	0.991259
ENST00000559478	1.37345	1.1488	3.01402	0.00356607	0.991259
ENST00000565985	0.601176	4.00951	3.01197	0.00358732	0.991259
ENST00000427159	-0.645173	6.00877	-3.00785	0.00361621	0.991259
ENST00000419992	1.9359	-1.28895	3.00514	0.00364487	0.991259
ENST00000598026	1.58894	-0.0752836	3.00384	0.00365874	0.991259
ENST00000605100	1.17662	1.18277	3.00505	0.00366032	0.991259
ENST00000649171	1.51626	1.1933	3.00493	0.00366149	0.991259
ENST00000413379	-1.62676	-1.73321	-3.00171	0.00368151	0.991259
ENST00000490090	1.69181	-0.345092	3.00225	0.00369077	0.991259
ENST00000641771	1.57841	-0.993984	3.00058	0.00369371	0.991259
ENST00000460475	-1.55306	1.36597	-2.99931	0.00372165	0.991259
ENST00000484012	1.43644	-0.554729	2.99772	0.00372463	0.991259
ENST00000600235	1.62099	1.07084	2.99687	0.00374904	0.991259
ENST00000636221	1.3174	0.835509	2.99465	0.003773	0.991259
ENST00000426898	1.31741	-1.73021	2.99307	0.00377546	0.991259
ENST00000514701	1.35055	-1.01728	2.99253	0.0037814	0.991259
ENST00000394976	-1.76937	1.3198	-2.9914	0.00379386	0.991259
ENST00000439374	1.27336	0.882523	2.9912	0.00379599	0.991259
ENST00000522121	-1.76826	-0.258081	-2.98935	0.0038281	0.991259
ENST00000338590	-1.86447	-0.105721	-2.98828	0.00382844	0.991259
ENST00000445477	-1.06936	2.34927	-2.98561	0.00385829	0.991259
ENST00000471739	-1.64921	-0.0749489	-2.98371	0.00387955	0.991259
ENST00000446543	1.76031	-1.56285	2.98364	0.00388043	0.991259
ENST00000369027	1.62874	-1.8718	2.9839	0.00389294	0.991259
ENST00000462425	1.46812	1.6858	2.98037	0.00391747	0.991259
ENST00000355305	1.38837	0.155877	2.98163	0.00391794	0.991259
ENST00000480964	-1.78376	-0.822572	-2.9797	0.00392505	0.991259
ENST00000572351	1.45552	0.0177216	2.9785	0.00393877	0.991259
ENST00000247207	-2.15286	-0.42866	-2.97972	0.00393931	0.991259
ENST00000360540	1.49182	0.575523	2.97954	0.0039416	0.991259
ENST00000462361	-1.56876	-0.26606	-2.97697	0.00395629	0.991259
ENST00000357743	-2.10139	-0.268819	-2.97561	0.00397188	0.991259
ENST00000458118	1.15768	1.5876	2.9751	0.00397778	0.991259
ENST00000419443	0.950385	1.85896	2.97449	0.00400014	0.991259
ENST00000296755	-0.536004	10.8829	-2.97362	0.00400918	0.991259
ENST00000462034	-1.60219	-0.854692	-2.96875	0.00405165	0.991259
ENST00000526909	1.64522	-1.54559	2.96667	0.00407613	0.991259
ENST00000381848	1.02499	3.50568	2.96481	0.00411419	0.991259
ENST00000374152	0.863845	2.43114	2.96332	0.00411582	0.991259
ENST00000479163	1.52499	-1.56511	2.96268	0.00412342	0.991259
ENST00000548559	1.68888	-1.76939	2.96232	0.00412778	0.991259
ENST00000578115	-1.57656	-0.557426	-2.9619	0.00413273	0.991259
ENST00000377670	1.26592	5.14491	2.96232	0.00414389	0.991259
ENST00000591516	1.58185	-1.32873	2.96072	0.004163	0.991259
ENST00000430505	1.57056	-1.40721	2.95865	0.00417184	0.991259
ENST00000519389	1.54853	0.422461	2.95885	0.00418469	0.991259
ENST00000566681	1.32058	-0.582479	2.95843	0.0041905	0.991259
ENST00000338548	1.48858	-1.13299	2.9575	0.00420177	0.991259
ENST00000448276	-1.75616	-1.03342	-2.95707	0.00420616	0.991259
ENST00000586796	1.29444	-0.0333274	2.95685	0.00420807	0.991259
ENST00000393985	1.66124	-0.842613	2.9556	0.00420873	0.991259
ENST00000354725	-0.586628	5.96089	-2.95444	0.00422287	0.991259
ENST00000583587	1.57705	-1.72217	2.95523	0.00422942	0.991259
ENST00000611703	1.4323	0.331461	2.95466	0.0042357	0.991259
ENST00000569803	1.4105	-0.221724	2.95242	0.00424758	0.991259
ENST00000378161	-1.54325	1.10878	-2.95161	0.00425753	0.991259
ENST00000595099	1.33877	0.112671	2.95054	0.0042707	0.991259
ENST00000366116	0.982014	1.92329	2.94987	0.00427884	0.991259
ENST00000473261	1.48805	-1.85879	2.94784	0.00430397	0.991259
ENST00000288135	1.35482	2.14977	2.94665	0.00431878	0.991259
ENST00000339526	-0.799195	6.00818	-2.94501	0.0043393	0.991259
ENST00000394668	1.34336	0.252689	2.94513	0.00435442	0.991259
ENST00000578812	1.49367	-0.411895	2.94254	0.00437021	0.991259
ENST00000516179	1.0978	1.27508	2.94232	0.00437308	0.991259
ENST00000575235	1.22067	0.791759	2.9397	0.00440613	0.991259
ENST00000538361	1.24773	0.598739	2.93834	0.0044234	0.991259
ENST00000585714	1.71901	-0.242364	2.93757	0.00443318	0.991259
ENST00000408865	-1.62539	-0.875261	-2.93757	0.00443321	0.991259
ENST00000609268	-1.80828	-0.878709	-2.93844	0.00443721	0.991259
ENST00000546995	1.4564	-1.02028	2.93661	0.00444552	0.991259
ENST00000463521	0.839781	2.66965	2.93202	0.00452086	0.991259
ENST00000592680	0.959798	2.68092	2.93049	0.00452438	0.991259
ENST00000268795	1.85035	-0.996189	2.92759	0.00456216	0.991259
ENST00000631455	-0.551319	7.93651	-2.92689	0.00457146	0.991259
ENST00000502962	-1.48976	0.537212	-2.92654	0.00459187	0.991259
ENST00000490775	1.56058	-1.29956	2.9248	0.00459889	0.991259
ENST00000520517	1.33112	0.0626779	2.92539	0.00460733	0.991259
ENST00000591978	0.675906	4.24994	2.92325	0.00461943	0.991259
ENST00000590481	1.15117	1.11759	2.92349	0.00463232	0.991259
ENST00000423230	1.46191	0.41401	2.92132	0.00464498	0.991259
ENST00000497924	1.49392	-1.01296	2.92157	0.00465883	0.991259
ENST00000322927	-0.422069	7.22195	-2.91933	0.00467165	0.991259
ENST00000304177	0.426913	6.88235	2.91884	0.00467817	0.991259
ENST00000469292	1.45542	-0.298306	2.91794	0.00469019	0.991259
ENST00000260379	1.44616	0.50344	2.91771	0.00469327	0.991259
ENST00000583666	-1.84869	-0.6924	-2.91415	0.00474141	0.991259
ENST00000466880	1.43347	-1.12956	2.91362	0.00474863	0.991259
ENST00000576787	1.08157	1.52526	2.91306	0.00475628	0.991259
ENST00000467960	1.3984	-0.120946	2.91207	0.00476974	0.991259
ENST00000484076	0.721088	3.04632	2.91139	0.00477906	0.991259
ENST00000572088	0.519388	6.14131	2.91094	0.00478517	0.991259
ENST00000502537	1.63841	-1.65708	2.90952	0.00482178	0.991259
ENST00000547004	1.42562	-1.85904	2.9077	0.00482974	0.991259
ENST00000474872	1.67277	-0.605116	2.90577	0.00485644	0.991259
ENST00000581265	0.596894	4.39505	2.90615	0.0048673	0.991259
ENST00000378116	-0.473838	9.74029	-2.90347	0.00488837	0.991259
ENST00000605131	1.5283	-0.367265	2.9039	0.00489955	0.991259
ENST00000492470	1.55317	-0.704187	2.90263	0.00490016	0.991259
ENST00000406539	-1.63193	-0.0434112	-2.90245	0.00491901	0.991259
ENST00000483700	1.51397	-0.215688	2.90078	0.00492607	0.991259
ENST00000572519	1.10671	1.10671	2.90048	0.00493039	0.991259
ENST00000470249	1.24442	0.586133	2.89923	0.00496512	0.991259
ENST00000616682	1.5344	0.0759758	2.89677	0.00498272	0.991259
ENST00000642688	1.66021	-0.352346	2.89512	0.00500629	0.991259
ENST00000479898	-1.7903	0.908248	-2.89564	0.00501515	0.991259
ENST00000359741	-1.76973	-0.883967	-2.89222	0.00504775	0.991259
ENST00000635552	0.633538	3.48665	2.89286	0.00505602	0.991259
ENST00000477410	1.13801	1.81529	2.89166	0.00507286	0.991259
ENST00000294829	-2.11195	-0.504373	-2.88951	0.00508692	0.991259
ENST00000357604	-1.69251	2.01549	-2.88946	0.00508764	0.991259
ENST00000495422	1.69328	-1.09599	2.88944	0.00508788	0.991259
ENST00000588651	1.54721	-0.0612871	2.88843	0.00510261	0.991259
ENST00000466107	1.65301	-1.3943	2.88787	0.00511074	0.991259
ENST00000478598	-1.77709	0.477995	-2.88751	0.0051159	0.991259
ENST00000593155	1.27751	-0.379723	2.88777	0.00512989	0.991259
ENST00000288670	-0.566138	11.6805	-2.8864	0.00513211	0.991259
ENST00000485756	1.09304	0.866703	2.88727	0.00513692	0.991259
ENST00000517720	1.23103	1.45412	2.88669	0.00514524	0.991259
ENST00000490005	1.01962	2.0097	2.88563	0.00516083	0.991259
ENST00000522842	1.4446	-0.413463	2.88396	0.00516785	0.991259
ENST00000645519	0.568628	4.70329	2.87925	0.00523756	0.991259
ENST00000515860	1.80823	-1.16464	2.8802	0.00524159	0.991259
ENST00000548878	1.30564	0.260547	2.87996	0.00524514	0.991259
ENST00000365391	1.73567	0.118501	2.87835	0.00525098	0.991259
ENST00000636820	-0.675432	8.20773	-2.87904	0.00525769	0.991259
ENST00000636068	-1.7287	-1.00622	-2.87637	0.00528049	0.991259
ENST00000479160	1.77431	-0.62492	2.87621	0.00528288	0.991259
ENST00000462311	1.00829	1.71964	2.87494	0.00530194	0.991259
ENST00000493416	-1.43546	2.06995	-2.87462	0.00530675	0.991259
ENST00000587038	-1.62425	-0.853168	-2.87347	0.00532409	0.991259
ENST00000619387	-0.661972	7.73651	-2.87438	0.00532896	0.991259
ENST00000467202	1.54782	-0.684857	2.87255	0.00533805	0.991259
ENST00000624164	-1.68685	-0.0686943	-2.87216	0.00534391	0.991259
ENST00000555335	1.66811	-1.73813	2.87331	0.00534526	0.991259
ENST00000526777	1.34406	-0.0233412	2.87244	0.00535683	0.991259
ENST00000516629	1.49722	-0.3665	2.87244	0.00535855	0.991259
ENST00000299240	-1.51791	0.324984	-2.87118	0.00535883	0.991259
ENST00000516171	1.37152	-0.924811	2.87143	0.00537395	0.991259
ENST00000005260	-1.77468	-0.540509	-2.871	0.00537954	0.991259
ENST00000476463	1.16447	0.681913	2.86779	0.00541059	0.991259
ENST00000384315	1.46986	-0.692064	2.86755	0.0054143	0.991259
ENST00000371947	-1.22244	1.66511	-2.86734	0.00541742	0.991259
ENST00000510694	1.51176	0.940656	2.8672	0.00541963	0.991259
ENST00000489134	1.59883	-0.826047	2.86651	0.00543025	0.991259
ENST00000444061	1.50479	0.165603	2.86642	0.00543161	0.991259
ENST00000610689	1.24363	0.666307	2.86618	0.00543532	0.991259
ENST00000524235	1.43978	-1.21818	2.86741	0.00543553	0.991259
ENST00000591691	-1.66583	1.0231	-2.86609	0.00543678	0.991259
ENST00000418757	-1.73483	-1.44887	-2.86594	0.00543906	0.991259
ENST00000356384	1.14727	1.93094	2.86574	0.00544207	0.991259
ENST00000233813	0.946996	5.54821	2.86569	0.00546185	0.991259
ENST00000560756	2.02011	-1.64026	2.86371	0.00547355	0.991259
ENST00000599808	-1.56848	-0.92898	-2.86433	0.00547888	0.991259
ENST00000533953	1.68787	-1.23581	2.86335	0.00547908	0.991259
ENST00000568420	1.47399	-0.952668	2.86439	0.00548168	0.991259
ENST00000569490	-2.57558	0.333051	-2.86239	0.00549399	0.991259
ENST00000583437	0.935902	3.57306	2.86227	0.00549579	0.991259
ENST00000650590	1.34766	0.513683	2.86101	0.00551545	0.991259
ENST00000365471	1.37073	-1.45788	2.86048	0.00552377	0.991259
ENST00000481185	1.67766	-0.693071	2.85888	0.0055487	0.991259
ENST00000290399	1.68851	1.05432	2.85884	0.00554939	0.991259
ENST00000465815	1.12411	2.0188	2.85807	0.00556151	0.991259
ENST00000586974	1.46169	-1.48846	2.85918	0.00556339	0.991259
ENST00000470703	0.67641	4.21519	2.85774	0.00556669	0.991259
ENST00000617331	1.28794	0.572546	2.85735	0.00557277	0.991259
ENST00000538994	1.62942	-1.50813	2.85604	0.00559348	0.991259
ENST00000570979	-1.62213	0.628789	-2.85531	0.005605	0.991259
ENST00000361675	-1.51286	9.23867	-2.85506	0.00562789	0.991259
ENST00000460340	-1.96243	-0.589131	-2.85455	0.00563457	0.991259
ENST00000643335	-1.59524	-0.44306	-2.85327	0.00563738	0.991259
ENST00000550614	1.68097	-0.39069	2.85128	0.00566914	0.991259
ENST00000461515	-1.3129	1.85978	-2.85077	0.00567745	0.991259
ENST00000415892	1.33393	0.172278	2.84988	0.00569166	0.991259
ENST00000590750	0.963424	2.74196	2.84852	0.00571346	0.991259
ENST00000439252	-0.69094	9.91834	-2.84849	0.00571405	0.991259
ENST00000644100	1.47241	-1.40561	2.84915	0.00572258	0.991259
ENST00000595615	-0.676849	5.56995	-2.84604	0.0057731	0.991259
ENST00000650821	1.55312	-1.22294	2.84394	0.00578779	0.991259
ENST00000321556	-0.69886	4.95301	-2.84364	0.00579266	0.991259
ENST00000370077	-2.05238	1.49182	-2.83944	0.00586155	0.991259
ENST00000590311	1.10875	5.08565	2.83941	0.00586217	0.991259
ENST00000639963	1.22413	1.38969	2.83922	0.00586531	0.991259
ENST00000472080	1.07174	1.03799	2.84003	0.00587034	0.991259
ENST00000330753	0.775621	5.00153	2.83783	0.00588831	0.991259
ENST00000542748	-1.08322	3.26991	-2.83753	0.00591321	0.991259
ENST00000282928	0.84326	4.2058	2.83712	0.00591943	0.991259
ENST00000411556	1.56738	-1.72863	2.83682	0.00592479	0.991259
ENST00000548731	0.789674	2.52517	2.83534	0.00594907	0.991259
ENST00000424138	-1.57284	-1.50835	-2.8353	0.00594935	0.991259
ENST00000531971	0.615964	4.28616	2.83233	0.00598	0.991259
ENST00000362934	1.17588	1.30859	2.83181	0.00598888	0.991259
ENST00000602342	0.927719	1.44711	2.83167	0.00599111	0.991259
ENST00000474849	-1.59183	-0.725684	-2.83194	0.00600585	0.991259
ENST00000550701	-1.41137	-0.985733	-2.83126	0.00601496	0.991259
ENST00000309880	-1.61974	0.663178	-2.82961	0.00602599	0.991259
ENST00000478903	1.13944	0.800773	2.83061	0.00602913	0.991259
ENST00000586142	1.6098	2.93753	2.82974	0.00604358	0.991259
ENST00000575331	-1.61095	-0.67729	-2.82867	0.00606192	0.991259
ENST00000566038	1.45858	-1.31918	2.82551	0.00609577	0.991259
ENST00000506009	-1.71199	-0.429372	-2.82534	0.00609856	0.991259
ENST00000552576	-0.52069	5.80362	-2.82627	0.00610288	0.991259
ENST00000415244	1.01678	2.24556	2.82494	0.00610544	0.991259
[truncated: 73,023 more rows]
