# Supplementary material for: Downregulated transcription in chromosomal domains of midbrain dopamine neurons linked to schizophrenia.
Source: Research Square preprint supplement (doi:10.21203/rs.3.rs-5354582/v1), 2024-11-08
Supplement: Supplementary file 3 [file 883621bd3d14bdd32623dd14.xlsx]

## Sheet: A
Dopa neurons SCZ vs Control
	logFC	AveExpr	t	P.Value	adj.P.Val
ENSG00000171747	1.8421	-0.846528	5.58555	7.38412e-07	0.0224167
ENSG00000172164	1.34329	1.38697	5.14222	3.68326e-06	0.024899
ENSG00000147872	1.17689	1.71937	5.08095	4.58999e-06	0.024899
ENSG00000257702	2.34946	-2.6967	5.06629	4.83762e-06	0.024899
ENSG00000124067	1.99617	1.68792	5.19474	4.91827e-06	0.024899
ENSG00000206561	-0.70104	4.91033	-5.05349	5.06448e-06	0.024899
ENSG00000108823	2.36087	-2.41506	5.00828	5.9528e-06	0.024899
ENSG00000107438	2.38935	-0.816062	4.97759	6.64142e-06	0.024899
ENSG00000213390	1.05359	2.16134	4.94841	7.38161e-06	0.024899
ENSG00000261490	1.06963	1.52667	4.90528	8.58776e-06	0.0253204
ENSG00000166825	2.48454	-0.214469	4.88663	9.17468e-06	0.0253204
ENSG00000173548	1.16855	2.47526	4.89972	1.04228e-05	0.0263678
ENSG00000111432	2.09774	-2.6987	4.78317	1.32181e-05	0.0308673
ENSG00000163739	2.85632	-1.58378	4.76017	1.43305e-05	0.0310747
ENSG00000130052	1.11543	2.72654	4.73378	1.57202e-05	0.0316375
ENSG00000274995	2.29485	-3.21061	4.6887	1.8405e-05	0.0316375
ENSG00000145623	2.45099	0.250828	4.68024	1.89568e-05	0.0316375
ENSG00000183098	-0.981043	5.40681	-4.66404	2.00582e-05	0.0316375
ENSG00000137834	2.21207	0.745257	4.65322	2.08292e-05	0.0316375
ENSG00000137809	1.78163	1.18412	4.6398	2.1825e-05	0.0316375
ENSG00000252908	-1.54448	-0.790451	-4.63508	2.21861e-05	0.0316375
ENSG00000120889	1.65919	1.51936	4.73031	2.40766e-05	0.0316375
ENSG00000067445	-0.797327	7.47273	-4.60919	2.42737e-05	0.0316375
ENSG00000082781	1.58561	2.14831	4.58296	2.72184e-05	0.0316375
ENSG00000285454	-1.15708	1.96016	-4.56058	2.87244e-05	0.0316375
ENSG00000106991	2.06457	1.4025	4.53399	3.14874e-05	0.0316375
ENSG00000090376	1.93705	2.39774	4.52429	3.25578e-05	0.0316375
ENSG00000137693	1.47191	1.68767	4.52039	3.29983e-05	0.0316375
ENSG00000178917	-0.554641	5.15093	-4.5156	3.35474e-05	0.0316375
ENSG00000198113	1.9645	-0.592359	4.4996	3.54455e-05	0.0316375
ENSG00000129158	-0.490449	5.45816	-4.49838	3.55949e-05	0.0316375
ENSG00000253848	-1.98036	-2.31442	-4.48877	3.67905e-05	0.0316375
ENSG00000172733	-0.577271	5.20336	-4.47467	3.86157e-05	0.0316375
ENSG00000139567	2.16653	0.391628	4.45218	4.17108e-05	0.0316375
ENSG00000164620	-1.13966	5.9065	-4.449	4.2461e-05	0.0316375
ENSG00000179144	2.24516	-0.0684135	4.44683	4.2481e-05	0.0316375
ENSG00000067182	1.97822	1.19659	4.54144	4.27977e-05	0.0316375
ENSG00000077150	1.8437	0.726086	4.43979	4.35167e-05	0.0316375
ENSG00000163909	1.79323	0.634733	4.45908	4.55842e-05	0.0316375
ENSG00000047457	2.61126	1.42441	4.42111	4.63862e-05	0.0316375
ENSG00000236303	-1.15646	2.31902	-4.42106	4.72519e-05	0.0316375
ENSG00000152104	1.27677	2.69609	4.40872	4.83898e-05	0.0316375
ENSG00000142173	1.61231	2.62302	4.39662	5.04282e-05	0.0316375
ENSG00000188783	1.90894	1.5646	4.39152	5.1312e-05	0.0316375
ENSG00000162494	1.84771	-3.39983	4.38889	5.18516e-05	0.0316375
ENSG00000099998	2.23856	0.63185	4.43249	5.26335e-05	0.0316375
ENSG00000132470	1.81945	1.48839	4.38181	5.30373e-05	0.0316375
ENSG00000173744	0.449172	6.2994	4.37229	5.53112e-05	0.0316375
ENSG00000106089	-0.963076	4.85907	-4.36764	5.56546e-05	0.0316375
ENSG00000174469	-0.599588	7.68198	-4.36918	5.57791e-05	0.0316375
ENSG00000213853	1.97377	0.373288	4.36511	5.61367e-05	0.0316375
ENSG00000285851	1.2746	0.166574	4.36428	5.62949e-05	0.0316375
ENSG00000250547	-1.59199	-0.0465679	-4.36297	5.66211e-05	0.0316375
ENSG00000149573	2.73178	-1.96766	4.35937	5.72417e-05	0.0316375
ENSG00000279041	1.99002	-0.88372	4.35898	5.73181e-05	0.0316375
ENSG00000137767	1.52149	-0.839003	4.35163	5.87658e-05	0.0318574
ENSG00000253208	-1.30639	2.40108	-4.33594	6.1976e-05	0.0320111
ENSG00000177374	1.22182	2.17096	4.32497	6.43218e-05	0.0320111
ENSG00000106624	1.59036	2.88985	4.32262	6.48356e-05	0.0320111
ENSG00000130158	1.38672	3.53914	4.32242	6.48797e-05	0.0320111
ENSG00000225746	-0.962238	7.81076	-4.31907	6.61432e-05	0.0320111
ENSG00000197256	1.32656	2.67303	4.3376	6.6207e-05	0.0320111
ENSG00000108405	2.07744	-1.4553	4.31544	6.64305e-05	0.0320111
ENSG00000132297	-2.28365	0.316456	-4.30998	6.88046e-05	0.0324961
ENSG00000052749	-0.647315	6.14893	-4.30463	6.95779e-05	0.0324961
ENSG00000077238	2.29803	1.85237	4.28902	7.26316e-05	0.033204
ENSG00000248008	-0.689446	3.65775	-4.28371	7.39448e-05	0.033204
ENSG00000112936	2.40372	0.491877	4.31505	7.43748e-05	0.033204
ENSG00000181215	-1.1529	7.16886	-4.27015	7.74014e-05	0.0337967
ENSG00000247627	2.00792	-0.694946	4.26566	7.85808e-05	0.0337967
ENSG00000161955	1.7117	-1.42701	4.26392	7.90422e-05	0.0337967
ENSG00000165458	1.0345	3.47753	4.25545	8.13257e-05	0.0340226
ENSG00000116962	1.54382	2.98153	4.2526	8.21101e-05	0.0340226
ENSG00000101638	-0.77013	6.0984	-4.24546	8.51327e-05	0.0340226
ENSG00000173530	2.15624	-0.777477	4.23613	8.67792e-05	0.0340226
ENSG00000049759	-0.504162	6.78071	-4.23536	8.76353e-05	0.0340226
ENSG00000128262	2.43223	-1.85709	4.23007	8.85608e-05	0.0340226
ENSG00000279839	2.05846	-2.76159	4.22645	8.96415e-05	0.0340226
ENSG00000064666	2.28501	-0.619948	4.22031	9.15081e-05	0.0340226
ENSG00000111674	-0.644979	8.03119	-4.2246	9.3438e-05	0.0340226
ENSG00000105255	-0.737221	5.78667	-4.21324	9.37005e-05	0.0340226
ENSG00000158270	1.81045	1.91529	4.20637	9.58781e-05	0.0340226
ENSG00000160883	1.93482	0.906516	4.20513	9.62762e-05	0.0340226
ENSG00000166997	-0.542776	4.46977	-4.19945	9.81252e-05	0.0340226
ENSG00000168994	1.23544	1.60057	4.24523	9.90821e-05	0.0340226
ENSG00000003436	2.03831	-0.0375386	4.18696	0.000102305	0.0340226
ENSG00000198771	1.94747	1.42384	4.18285	0.000103721	0.0340226
ENSG00000079841	-0.784758	7.4731	-4.18127	0.000104478	0.0340226
ENSG00000025708	2.27848	0.464545	4.17996	0.000104725	0.0340226
ENSG00000172037	1.28575	3.12283	4.17369	0.000106937	0.0340226
ENSG00000239040	1.33786	-0.0845964	4.17277	0.000107266	0.0340226
ENSG00000196118	-0.98922	3.68543	-4.15781	0.000112751	0.0340226
ENSG00000124440	1.56704	2.61345	4.15285	0.000114625	0.0340226
ENSG00000172322	2.6197	-2.06025	4.19482	0.000115338	0.0340226
ENSG00000143416	1.93281	-0.903618	4.1466	0.000117033	0.0340226
ENSG00000008277	-0.503075	7.64031	-4.14723	0.000117597	0.0340226
ENSG00000204301	1.50616	2.86436	4.14498	0.000117665	0.0340226
ENSG00000218536	-1.42611	-0.468484	-4.14633	0.000118187	0.0340226
ENSG00000235944	-0.956729	5.46553	-4.14013	0.000119579	0.0340226
ENSG00000258399	-1.03288	4.84966	-4.14147	0.00011965	0.0340226
ENSG00000171811	-1.02551	6.72883	-4.13974	0.000119733	0.0340226
ENSG00000125735	1.95869	-2.23703	4.1341	0.000121996	0.0340226
ENSG00000239481	-1.72457	-2.33128	-4.12668	0.000125039	0.0340226
ENSG00000228222	-1.31064	4.02478	-4.12623	0.000125241	0.0340226
ENSG00000174428	0.647898	3.65534	4.12297	0.000126675	0.0340226
ENSG00000132205	1.6327	2.05149	4.11959	0.000128015	0.0340226
ENSG00000255916	-1.44749	1.51535	-4.11768	0.000128827	0.0340226
ENSG00000163817	2.80671	0.236278	4.11757	0.000128876	0.0340226
ENSG00000103044	-0.661106	2.7436	-4.11464	0.000130134	0.0340226
ENSG00000225630	1.68372	0.873671	4.11422	0.000130316	0.0340226
ENSG00000125810	2.28789	0.574391	4.11273	0.00013096	0.0340226
ENSG00000239713	2.26015	-1.21811	4.11159	0.000131454	0.0340226
ENSG00000177182	-0.867873	4.72136	-4.11228	0.000132068	0.0340226
ENSG00000006607	0.416385	6.34584	4.1099	0.000132196	0.0340226
ENSG00000177173	1.19499	0.908924	4.10963	0.000132311	0.0340226
ENSG00000157110	1.65907	1.79968	4.10544	0.000134158	0.0340226
ENSG00000213398	1.59089	-0.201005	4.13367	0.000135421	0.0340226
ENSG00000197043	-0.603643	7.5958	-4.10161	0.000135873	0.0340226
ENSG00000175264	-0.745807	4.81115	-4.10099	0.000136195	0.0340226
ENSG00000189079	0.501607	5.8319	4.10058	0.000136336	0.0340226
ENSG00000116132	1.64723	0.994308	4.10034	0.000136442	0.0340226
ENSG00000119686	2.12081	0.627878	4.09971	0.000136727	0.0340226
ENSG00000118197	0.4824	4.23023	4.0965	0.000138188	0.0341067
ENSG00000257057	-1.78772	-1.67933	-4.08999	0.000141194	0.0344079
ENSG00000279637	1.92544	-2.25973	4.08397	0.000144031	0.0344079
ENSG00000118271	2.25215	-2.13449	4.08367	0.000144377	0.0344079
ENSG00000167107	1.58288	0.441437	4.0902	0.000144686	0.0344079
ENSG00000084093	1.74016	1.43719	4.08084	0.000145528	0.0344079
ENSG00000000971	2.44896	1.58936	4.17082	0.000147305	0.0344079
ENSG00000007866	2.06285	-1.35748	4.07691	0.000147532	0.0344079
ENSG00000237973	2.9195	2.06266	4.07155	0.000150061	0.0344079
ENSG00000050555	1.73863	2.1116	4.07744	0.00015103	0.0344079
ENSG00000155974	-0.86248	5.74077	-4.06695	0.000152438	0.0344079
ENSG00000223797	0.919727	1.77112	4.06378	0.000153955	0.0344079
ENSG00000234380	1.8271	-3.12841	4.06145	0.000155143	0.0344079
ENSG00000173442	1.26667	4.01178	4.05946	0.000156161	0.0344079
ENSG00000127920	2.01015	-1.50102	4.0583	0.000156757	0.0344079
ENSG00000265972	1.90739	2.7783	4.10938	0.00015732	0.0344079
ENSG00000075290	1.83543	-1.53084	4.06082	0.000157543	0.0344079
ENSG00000144908	1.81644	2.03628	4.09129	0.000161481	0.0346831
ENSG00000096433	1.33176	3.11404	4.04848	0.000161912	0.0346831
ENSG00000112186	-0.565663	4.75631	-4.0477	0.000162832	0.0346831
ENSG00000187922	1.98305	-3.17512	4.05355	0.000163373	0.0346831
ENSG00000205038	1.80957	-0.372238	4.05435	0.000170258	0.0358937
ENSG00000100767	1.98873	1.31015	4.02582	0.000174426	0.0364594
ENSG00000117151	0.80256	2.78768	4.02422	0.000175344	0.0364594
ENSG00000119699	0.65411	3.28573	4.02128	0.000177474	0.0366514
ENSG00000067082	0.697779	4.98574	4.01696	0.000179567	0.0368331
ENSG00000150048	1.98077	-2.08469	4.01482	0.000180836	0.0368393
ENSG00000174600	1.84831	0.791581	4.01282	0.000182025	0.0368393
ENSG00000106823	1.73147	0.952112	4.00725	0.000185372	0.0371115
ENSG00000214548	-0.897659	12.7816	-4.00612	0.000186064	0.0371115
ENSG00000150907	1.00534	3.36907	4.00415	0.000187926	0.0371115
ENSG00000201700	-1.20891	3.16055	-4.00472	0.000188259	0.0371115
ENSG00000118523	1.92227	1.43584	4.00008	0.00019042	0.0372954
ENSG00000147485	-0.923529	3.01828	-3.99761	0.000191966	0.037309
ENSG00000109743	1.76765	-0.872799	3.99486	0.000193045	0.037309
ENSG00000138448	0.62709	5.58387	3.99308	0.000194177	0.037309
ENSG00000122122	2.2587	-0.964416	3.98817	0.000197316	0.0373905
ENSG00000130307	2.20574	-0.394317	3.98493	0.000199418	0.0373905
ENSG00000141401	2.12583	-1.41398	3.98364	0.000200257	0.0373905
ENSG00000198483	-1.12108	4.44194	-3.9832	0.000201975	0.0373905
ENSG00000185404	1.06628	2.48508	4.006	0.000202419	0.0373905
ENSG00000128253	-1.46649	3.01781	-3.9804	0.000203965	0.0373905
ENSG00000119681	1.66388	2.62234	3.97746	0.000204343	0.0373905
ENSG00000144476	1.64348	-0.296129	3.97657	0.000204934	0.0373905
ENSG00000103710	1.93558	-0.332369	3.97545	0.000205686	0.0373905
ENSG00000112343	2.20132	0.834941	3.96966	0.000209607	0.0378764
ENSG00000135363	0.961402	2.99348	3.96699	0.000211436	0.0379809
ENSG00000139350	0.781909	1.88758	3.96492	0.000213732	0.0381674
ENSG00000054598	2.45496	0.238641	3.9614	0.000215326	0.0382226
ENSG00000151012	1.39764	3.30572	3.95918	0.00021689	0.0382226
ENSG00000236880	-2.03768	-2.17589	-3.96152	0.000217818	0.0382226
ENSG00000107738	2.24324	1.05536	3.95395	0.000220615	0.0384909
ENSG00000115919	2.20766	-0.352184	3.94926	0.000224009	0.0388055
ENSG00000284977	1.95939	0.861438	3.94794	0.000224974	0.0388055
ENSG00000101276	2.51291	-1.86854	3.94297	0.000228637	0.0392004
ENSG00000158195	0.715774	5.16525	3.95671	0.000230375	0.0392004
ENSG00000224963	1.66825	-2.28355	3.93962	0.000231137	0.0392004
ENSG00000131127	0.433798	6.05538	3.93857	0.0002325	0.0392123
ENSG00000229146	-1.34103	2.41834	-3.93002	0.000238606	0.0398978
ENSG00000077942	2.04425	1.45522	3.93328	0.000239192	0.0398978
ENSG00000142871	1.8452	1.80124	3.92118	0.000245394	0.0406899
ENSG00000147138	1.53624	-2.98318	3.91719	0.000248595	0.0406899
ENSG00000100167	-0.556119	6.73074	-3.91797	0.000250117	0.0406899
ENSG00000152661	1.97162	1.27669	3.91524	0.000250168	0.0406899
ENSG00000067955	0.857047	3.77195	3.9146	0.000250684	0.0406899
ENSG00000003400	1.52778	1.45396	3.91301	0.000251983	0.0406899
ENSG00000136425	-0.825472	2.5504	-3.91196	0.000253994	0.0407331
ENSG00000134775	-0.974357	6.64465	-3.90871	0.000255837	0.0407331
ENSG00000208004	-1.80019	-0.728319	-3.91196	0.000256276	0.0407331
ENSG00000198216	-0.574866	8.73279	-3.90442	0.000259089	0.0409097
ENSG00000136869	1.82388	1.95051	3.90324	0.000260082	0.0409097
ENSG00000168542	1.54193	1.82909	3.89822	0.000264339	0.041156
ENSG00000234961	2.0134	-2.83686	3.89785	0.000264656	0.041156
ENSG00000278177	-1.3255	0.978264	-3.89803	0.000266401	0.041156
ENSG00000144810	1.44836	0.51902	3.8933	0.000268576	0.041156
ENSG00000163762	1.83963	-0.679879	3.89283	0.000268987	0.041156
ENSG00000134597	-0.434555	4.92536	-3.89076	0.000270786	0.041156
ENSG00000169291	1.95743	1.04343	3.88783	0.00027336	0.041156
ENSG00000131196	1.69874	-0.0153918	3.96342	0.000275308	0.041156
ENSG00000166881	0.526679	3.19419	3.90037	0.00027538	0.041156
ENSG00000237133	-1.10496	1.06729	-3.88605	0.000275567	0.041156
ENSG00000249958	1.97405	-1.69144	3.97106	0.000276699	0.041156
ENSG00000155980	-0.639186	8.6079	-3.88144	0.000279504	0.041156
ENSG00000119703	-0.680501	3.73864	-3.8835	0.000280322	0.041156
ENSG00000198932	-0.642924	9.32068	-3.87901	0.000281259	0.041156
ENSG00000111452	1.34348	2.58587	3.87821	0.000281983	0.041156
ENSG00000163565	1.59383	2.33151	3.87612	0.000283894	0.0411888
ENSG00000074047	1.15123	0.27631	3.87419	0.000285662	0.0411888
ENSG00000111341	2.30638	-0.333378	3.87352	0.000286278	0.0411888
ENSG00000198785	-0.79091	5.98047	-3.87154	0.000288116	0.0412577
ENSG00000221866	-0.837162	7.21563	-3.87218	0.000289899	0.0413181
ENSG00000167553	1.15521	0.824414	3.89909	0.000291732	0.0413851
ENSG00000106560	2.00163	-2.0209	3.86547	0.0002938	0.0414846
ENSG00000090924	1.17096	2.67816	3.8618	0.000297302	0.0415568
ENSG00000163220	2.34959	-2.87632	3.87564	0.000297709	0.0415568
ENSG00000047617	1.43527	1.71632	3.85998	0.000299047	0.0415568
ENSG00000157227	1.82736	0.998592	3.85806	0.000300893	0.0415568
ENSG00000108309	-0.478069	7.13573	-3.85895	0.000301468	0.0415568
ENSG00000196169	1.763	0.092395	3.85402	0.000304833	0.0415568
ENSG00000162373	-0.598105	4.44166	-3.85035	0.000308449	0.0415568
ENSG00000139998	-0.57602	6.36139	-3.8498	0.000308996	0.0415568
ENSG00000198156	1.65935	-1.18276	3.85666	0.000311942	0.0415568
ENSG00000124212	1.22159	1.81373	3.8435	0.000315319	0.0415568
ENSG00000119714	-1.18364	1.70975	-3.84048	0.000319944	0.0415568
ENSG00000213279	1.9565	-1.95801	3.8389	0.00032001	0.0415568
ENSG00000179776	2.1026	0.656513	3.83851	0.000320408	0.0415568
ENSG00000102802	1.79638	-1.69118	3.83801	0.000320921	0.0415568
ENSG00000261033	-1.35613	0.46095	-3.84097	0.000321837	0.0415568
ENSG00000147642	-0.515767	6.5705	-3.83645	0.000322532	0.0415568
ENSG00000154277	-0.669473	8.23112	-3.83559	0.000323528	0.0415568
ENSG00000187984	-0.754705	5.45372	-3.83627	0.000324448	0.0415568
ENSG00000178033	1.49342	-0.219632	3.83436	0.000324705	0.0415568
ENSG00000241839	1.48334	1.20958	3.83391	0.000325174	0.0415568
ENSG00000107105	-1.01926	5.99462	-3.83579	0.000325399	0.0415568
ENSG00000228649	2.05979	-1.96422	3.83199	0.000327189	0.0415568
ENSG00000168961	1.58157	1.18904	3.83329	0.000327262	0.0415568
ENSG00000261371	1.29628	4.34976	3.83095	0.000328276	0.0415568
ENSG00000118707	1.98977	-1.33288	3.83032	0.000328944	0.0415568
ENSG00000198774	2.10063	-2.52226	3.82941	0.000329903	0.0415568
ENSG00000177350	-1.03443	1.78118	-3.83011	0.000332008	0.0416491
ENSG00000168032	-0.814955	4.57767	-3.82366	0.000337094	0.0418496
ENSG00000135365	0.373877	6.28544	3.82508	0.000337346	0.0418496
ENSG00000162733	0.811693	2.90891	3.82135	0.000338537	0.0418496
ENSG00000145920	-0.843824	6.84283	-3.82322	0.00033912	0.0418496
ENSG00000239382	-0.569976	4.4628	-3.81689	0.000343402	0.0420827
ENSG00000035928	0.441882	5.57665	3.81551	0.000344936	0.0420827
ENSG00000185880	-0.583842	5.05443	-3.81524	0.000345222	0.0420827
ENSG00000103723	-0.644456	8.28805	-3.81404	0.000346554	0.0420827
ENSG00000278654	-1.45434	2.324	-3.81161	0.000349258	0.0422421
ENSG00000160219	2.11434	0.74165	3.90964	0.000354079	0.0426328
ENSG00000108797	-0.652821	7.66161	-3.80577	0.000356272	0.0426328
ENSG00000278970	0.597803	2.7274	3.80432	0.000357494	0.0426328
ENSG00000004799	2.03252	1.55778	3.80278	0.00035926	0.0426328
ENSG00000135124	0.640449	3.4346	3.80246	0.000359631	0.0426328
ENSG00000142798	1.25658	3.61897	3.80134	0.000360914	0.0426328
ENSG00000102362	1.36762	2.25233	3.79834	0.000364394	0.0427623
ENSG00000143382	1.30903	1.35606	3.80038	0.000364828	0.0427623
ENSG00000249669	2.11853	2.71075	3.79371	0.00036982	0.0431808
ENSG00000226015	1.68696	-0.643476	3.78799	0.00037663	0.0436209
ENSG00000137494	-0.547215	6.0456	-3.78719	0.000377591	0.0436209
ENSG00000171533	-0.657199	6.86726	-3.78703	0.0003779	0.0436209
ENSG00000117525	1.58267	1.95345	3.78393	0.000381542	0.0437963
ENSG00000115380	1.6198	1.54522	3.7833	0.000382305	0.0437963
ENSG00000135540	1.37476	2.41796	3.78018	0.000386127	0.0439514
ENSG00000213719	1.90147	-0.146766	3.77983	0.000386555	0.0439514
ENSG00000028137	2.05928	0.943436	3.77622	0.000391026	0.0441676
ENSG00000174521	-0.890475	3.3121	-3.77444	0.000393251	0.0441676
ENSG00000165071	1.96718	-2.05074	3.77387	0.000393967	0.0441676
ENSG00000111859	1.15744	2.97476	3.77264	0.000395509	0.0441676
ENSG00000196569	1.78807	3.94883	3.77246	0.000395731	0.0441676
ENSG00000173727	1.254	0.116781	3.78604	0.000400652	0.0443528
ENSG00000026103	1.29007	0.87008	3.76782	0.000401628	0.0443528
ENSG00000115226	-0.625263	4.00518	-3.76792	0.000401773	0.0443528
ENSG00000158156	1.38214	-0.206	3.76184	0.000409339	0.0450243
ENSG00000145012	0.440725	5.84642	3.75725	0.000415355	0.0453625
ENSG00000143384	0.806056	5.63443	3.75704	0.000415633	0.0453625
ENSG00000283561	-1.60683	-0.723871	-3.75542	0.000417777	0.0453625
ENSG00000127528	2.09493	1.41882	3.75264	0.000421472	0.0453625
ENSG00000105137	1.88028	-0.719112	3.81167	0.000421921	0.0453625
ENSG00000182511	1.4668	1.1482	3.75176	0.00042266	0.0453625
ENSG00000256654	-1.24924	4.25788	-3.7544	0.000422873	0.0453625
ENSG00000230063	1.46174	-0.918499	3.74939	0.000425854	0.0455214
ENSG00000118503	1.3187	2.34948	3.75087	0.000429783	0.0456295
ENSG00000162924	0.600789	4.5188	3.74643	0.000429872	0.0456295
ENSG00000213949	1.86821	1.51715	3.74507	0.000431718	0.0456658
ENSG00000105971	1.25452	0.652488	3.78151	0.000434614	0.0456726
ENSG00000237517	-1.00221	4.82569	-3.74099	0.000438766	0.0456726
ENSG00000283638	1.92527	-2.90171	3.73831	0.000441075	0.0456726
ENSG00000151702	1.69846	1.05274	3.7375	0.000442215	0.0456726
ENSG00000232903	-1.39084	1.11141	-3.74058	0.000442219	0.0456726
ENSG00000172123	2.35351	-0.904454	3.73672	0.000443311	0.0456726
ENSG00000225931	1.81279	-3.33967	3.7521	0.000443655	0.0456726
ENSG00000103196	1.5332	1.54804	3.7356	0.000444875	0.0456726
ENSG00000261775	1.76054	-1.84878	3.75138	0.000445322	0.0456726
ENSG00000100285	-1.39457	6.59347	-3.73465	0.000449847	0.0459257
ENSG00000162722	-1.10212	3.81338	-3.73078	0.000451963	0.0459257
ENSG00000164707	1.38202	-0.349909	3.72795	0.000455789	0.0459257
ENSG00000173597	1.87203	-1.56797	3.72685	0.000457374	0.0459257
ENSG00000100979	1.04692	2.15848	3.72661	0.000457734	0.0459257
ENSG00000185591	0.452577	5.83848	3.7266	0.000457735	0.0459257
ENSG00000143375	-0.728944	6.35555	-3.72691	0.000458379	0.0459257
ENSG00000176454	-0.949461	7.0399	-3.72365	0.000462034	0.046053
ENSG00000197329	1.03886	3.37912	3.72321	0.000462684	0.046053
ENSG00000175489	2.41018	-2.03076	3.72178	0.000464771	0.0461095
ENSG00000119630	1.63474	-0.512221	3.72044	0.000466741	0.0461542
ENSG00000087245	1.33614	0.793115	3.71778	0.000470691	0.0463936
ENSG00000122986	1.8544	-0.779272	3.71606	0.000473254	0.0464953
ENSG00000096060	1.66051	3.60852	3.71501	0.000474827	0.0464993
ENSG00000149499	0.839481	3.28076	3.70996	0.000482467	0.0468332
ENSG00000110799	1.93152	3.67791	3.70975	0.000482782	0.0468332
ENSG00000163820	0.914638	3.73569	3.7097	0.000482864	0.0468332
ENSG00000152284	0.979032	1.64394	3.74164	0.000487986	0.0471792
ENSG00000255031	1.72202	-0.640562	3.70463	0.00049065	0.0472862
ENSG00000239169	-1.38882	-0.642798	-3.70533	0.000493339	0.0473949
ENSG00000114923	-0.78526	6.93381	-3.70045	0.00049716	0.0474222
ENSG00000161204	-0.395455	6.42864	-3.7	0.000497871	0.0474222
ENSG00000112679	0.553656	4.38806	3.69972	0.00049831	0.0474222
ENSG00000110719	1.17927	2.63578	3.69499	0.000505783	0.0479376
ENSG00000263426	-1.4473	8.81104	-3.69554	0.000506883	0.0479376
ENSG00000085265	1.89048	0.43114	3.69312	0.000508777	0.0479384
ENSG00000158258	-1.02509	6.50944	-3.69478	0.000510051	0.0479384
ENSG00000164035	1.5306	-0.432737	3.68996	0.000513876	0.0479694
ENSG00000156097	-0.713901	5.43725	-3.68779	0.000517385	0.0479694
ENSG00000279118	1.86835	-1.13542	3.68737	0.000518083	0.0479694
ENSG00000135127	-0.777844	7.22238	-3.68606	0.000520217	0.0479694
ENSG00000185518	-1.16997	5.00466	-3.68895	0.00052027	0.0479694
ENSG00000033122	-0.625809	7.8626	-3.68578	0.000520677	0.0479694
ENSG00000106366	2.21032	-0.969306	3.68531	0.000521441	0.0479694
ENSG00000196329	1.79726	-0.863377	3.68425	0.000523184	0.0479843
ENSG00000271601	0.524923	2.94183	3.68215	0.000528301	0.0483077
ENSG00000068078	1.37997	2.82965	3.6784	0.000532908	0.0485826
ENSG00000197694	-0.575512	11.1218	-3.67673	0.000535705	0.0486914
ENSG00000198797	-0.55611	5.61106	-3.67577	0.000537819	0.0487377
ENSG00000216490	2.17473	-1.59914	3.67389	0.000540514	0.048836
ENSG00000085831	-0.876866	5.5035	-3.67157	0.000544466	0.0489109
ENSG00000170382	-0.589443	5.75414	-3.67151	0.000544564	0.0489109
ENSG00000144579	1.08902	2.11336	3.66683	0.000552628	0.0494887
ENSG00000267519	1.6061	1.77288	3.66278	0.000559705	0.049975
ENSG00000232352	1.93531	-2.94203	3.66374	0.000562228	0.0500532
ENSG00000163840	1.6383	1.46096	3.65789	0.000568353	0.0504505
ENSG00000213999	1.49826	-2.71408	3.65687	0.000571015	0.050539
ENSG00000134574	0.925746	2.05545	3.67997	0.000577376	0.0509534
ENSG00000161542	-0.482076	6.88916	-3.64949	0.000583919	0.0510785
ENSG00000143858	-1.15957	5.7318	-3.65064	0.000586339	0.0510785
ENSG00000144645	-0.97363	4.96936	-3.64639	0.000591661	0.0510785
ENSG00000250158	1.6173	-2.46263	3.64392	0.000593774	0.0510785
ENSG00000199005	-0.846309	2.41658	-3.64419	0.000599178	0.0510785
ENSG00000171812	2.04111	-1.50577	3.64082	0.000599548	0.0510785
ENSG00000008118	-0.909226	3.86753	-3.64031	0.000600719	0.0510785
ENSG00000103335	1.38132	3.30094	3.6401	0.000600915	0.0510785
ENSG00000244682	2.77557	-0.146842	3.63997	0.000601153	0.0510785
ENSG00000231535	1.97664	-2.56437	3.64255	0.000603278	0.0510785
ENSG00000267630	-1.62655	-1.22161	-3.63884	0.000603278	0.0510785
ENSG00000143458	0.52508	5.8548	3.63799	0.000605285	0.0510785
ENSG00000184730	1.87629	0.00357089	3.63681	0.000607127	0.0510785
ENSG00000121769	-0.881136	3.34109	-3.63942	0.000607844	0.0510785
ENSG00000172216	1.30753	2.36384	3.63543	0.000609749	0.0510785
ENSG00000111490	-0.587255	6.6244	-3.63942	0.000609919	0.0510785
ENSG00000170786	-1.70908	0.616519	-3.63729	0.000613296	0.0510785
ENSG00000150457	1.26406	2.32384	3.63645	0.000613867	0.0510785
ENSG00000143515	-0.641109	6.63399	-3.63316	0.000614258	0.0510785
ENSG00000129450	2.14658	-1.08985	3.63295	0.000614501	0.0510785
ENSG00000171720	-0.364133	5.78741	-3.6321	0.000616916	0.0510785
ENSG00000123094	0.527226	4.95559	3.63166	0.000616977	0.0510785
ENSG00000196865	0.378173	5.54367	3.63132	0.000617624	0.0510785
ENSG00000268182	-0.768382	4.87506	-3.63049	0.000620589	0.0510785
ENSG00000103888	1.63306	4.19033	3.62965	0.000620857	0.0510785
ENSG00000123360	-0.637038	5.32227	-3.6287	0.000622748	0.0510956
ENSG00000115604	1.62895	-0.731048	3.64335	0.000626139	0.0512354
ENSG00000163661	-1.27177	-0.07484	-3.62448	0.000630958	0.0514909
ENSG00000102699	1.22907	3.53215	3.62318	0.000633524	0.0515041
ENSG00000197142	1.7524	0.0827663	3.62231	0.00063525	0.0515041
ENSG00000251697	-1.39977	-0.672925	-3.62153	0.000638012	0.0515041
ENSG00000182366	-1.78952	-1.54899	-3.62172	0.000640547	0.0515041
ENSG00000128274	2.01331	-0.486207	3.62514	0.000643791	0.0515041
ENSG00000173281	1.6274	0.564786	3.6178	0.000644245	0.0515041
ENSG00000106003	1.50698	0.994947	3.61563	0.000648623	0.0515041
ENSG00000065526	0.318682	8.11787	3.61393	0.000652056	0.0515041
ENSG00000198910	-1.09379	6.35551	-3.61557	0.000652061	0.0515041
ENSG00000275395	1.6193	2.20312	3.61291	0.000654146	0.0515041
ENSG00000275465	1.91069	-1.6032	3.61207	0.000655852	0.0515041
ENSG00000282164	-0.46699	5.56984	-3.61318	0.000656039	0.0515041
ENSG00000117069	-0.947795	3.7679	-3.61492	0.000656307	0.0515041
ENSG00000207014	-0.847386	3.44208	-3.61274	0.000659051	0.0515041
ENSG00000100401	-0.428666	7.41992	-3.61122	0.000659192	0.0515041
ENSG00000119946	-0.665205	6.16665	-3.61001	0.000660082	0.0515041
ENSG00000108784	0.580461	2.57398	3.60794	0.000664347	0.0515041
ENSG00000160255	1.77877	1.38302	3.60694	0.000666417	0.0515041
ENSG00000184368	-0.713856	7.22596	-3.60652	0.000667297	0.0515041
ENSG00000204396	-1.37505	3.22663	-3.60584	0.000668712	0.0515041
ENSG00000189108	-1.69327	2.39171	-3.60892	0.000668719	0.0515041
ENSG00000083168	0.314088	7.40718	3.60474	0.000671001	0.0515041
ENSG00000138119	1.39785	3.2758	3.60472	0.00067103	0.0515041
ENSG00000176697	-1.42029	2.35478	-3.60779	0.000671837	0.0515041
ENSG00000138131	1.71152	-0.0351204	3.60248	0.00067573	0.051672
ENSG00000275672	1.11493	0.646038	3.6005	0.000679916	0.0518615
ENSG00000148175	0.854809	3.87086	3.59607	0.00068934	0.052203
ENSG00000188848	-0.833356	3.91313	-3.59609	0.000690517	0.052203
ENSG00000157680	-0.48918	7.35636	-3.59457	0.000692568	0.052203
ENSG00000174453	-0.963138	3.31073	-3.59619	0.000692742	0.052203
ENSG00000185339	0.836809	3.08441	3.59503	0.000692991	0.052203
ENSG00000159708	-1.06251	2.17221	-3.59431	0.000696923	0.0523639
ENSG00000137171	-0.565449	5.58594	-3.59179	0.000698576	0.0523639
ENSG00000143674	-0.730248	4.73353	-3.59086	0.000700601	0.0523863
ENSG00000109618	0.564623	3.1128	3.58976	0.000702977	0.0524348
ENSG00000183665	-0.358221	4.32399	-3.58829	0.000706199	0.0524635
ENSG00000118369	-0.612805	5.95568	-3.5861	0.00071157	0.0524635
ENSG00000185432	1.60799	1.28668	3.64344	0.000711984	0.0524635
ENSG00000158869	1.35684	-0.347514	3.58527	0.000712848	0.0524635
ENSG00000115594	1.41654	1.60055	3.5847	0.000714117	0.0524635
ENSG00000188511	1.69599	-0.111461	3.58425	0.000715116	0.0524635
ENSG00000187556	-0.873048	1.53295	-3.5836	0.000716563	0.0524635
ENSG00000164692	1.91492	2.08039	3.59383	0.000717186	0.0524635
ENSG00000142102	1.62441	0.210055	3.58089	0.000722618	0.0527337
ENSG00000265107	1.70551	-1.18049	3.57976	0.000725151	0.0527917
ENSG00000198888	1.47844	7.05139	3.57619	0.000733221	0.0532515
ENSG00000239998	2.17707	-1.58507	3.57494	0.000736065	0.0533304
ENSG00000154016	1.66046	-1.98996	3.58299	0.000739097	0.0534226
ENSG00000101336	1.86431	0.80508	3.57198	0.000742846	0.053513
ENSG00000204261	1.73165	-1.27151	3.57142	0.000744139	0.053513
ENSG00000142089	1.79602	0.172646	3.57077	0.000745635	0.053513
ENSG00000215018	-0.818984	5.56197	-3.57176	0.000748767	0.053611
ENSG00000105784	-0.651408	5.05686	-3.56866	0.000753693	0.0538367
ENSG00000115641	1.47631	1.28863	3.56525	0.000758479	0.053959
ENSG00000170236	1.31525	-0.752817	3.56444	0.000760382	0.053959
ENSG00000144895	0.487454	4.10612	3.56267	0.000764575	0.053959
ENSG00000100297	1.25037	1.67397	3.56195	0.000766282	0.053959
ENSG00000173715	-0.653368	5.61115	-3.56244	0.000769384	0.053959
ENSG00000105281	1.8819	-0.0377396	3.55708	0.000777894	0.053959
ENSG00000160593	1.87618	0.595027	3.55694	0.000778245	0.053959
ENSG00000183888	2.20563	-1.06242	3.55689	0.000778352	0.053959
ENSG00000183087	-0.612074	6.90218	-3.55713	0.000778448	0.053959
ENSG00000128052	1.58845	0.720945	3.55579	0.000781002	0.053959
ENSG00000125733	1.02367	2.42116	3.55488	0.000783197	0.053959
ENSG00000115935	1.32364	3.56655	3.55472	0.000783589	0.053959
ENSG00000080573	1.39958	2.5162	3.56087	0.000783868	0.053959
ENSG00000080224	-0.914713	6.21552	-3.55345	0.000786674	0.053959
ENSG00000196209	2.21933	-0.884393	3.55341	0.000786765	0.053959
ENSG00000257511	0.752897	1.80634	3.55242	0.000789848	0.053959
ENSG00000226808	1.85467	-1.74908	3.55025	0.000794499	0.053959
ENSG00000243836	2.03729	-2.29992	3.54977	0.000795661	0.053959
ENSG00000204175	-1.13351	4.15356	-3.5495	0.000796323	0.053959
ENSG00000196878	-0.790374	2.48237	-3.54916	0.000797161	0.053959
ENSG00000118733	-0.730405	5.17151	-3.54817	0.000799697	0.053959
ENSG00000090554	1.31819	-0.360848	3.54709	0.00080229	0.053959
ENSG00000143624	-0.440994	8.31947	-3.54687	0.000802818	0.053959
ENSG00000159214	-0.667591	4.36249	-3.54576	0.000805574	0.053959
ENSG00000146648	1.14364	3.92614	3.54633	0.000806053	0.053959
ENSG00000231856	0.813192	0.89691	3.54522	0.000806916	0.053959
ENSG00000272990	1.29101	-0.307653	3.56217	0.000807738	0.053959
ENSG00000223572	-0.972477	5.18145	-3.54484	0.000807869	0.053959
ENSG00000237412	-1.32532	1.07687	-3.54432	0.000809159	0.053959
ENSG00000244306	1.60202	-0.355803	3.54258	0.000813518	0.053959
ENSG00000254910	1.53389	-3.59151	3.5423	0.000814217	0.053959
ENSG00000196914	-0.34322	8.6553	-3.54217	0.000814553	0.053959
ENSG00000210082	1.23473	9.38024	3.55171	0.000816203	0.053959
ENSG00000186487	-0.632494	9.0537	-3.54132	0.000816683	0.053959
ENSG00000198959	1.96022	1.88859	3.54066	0.000818347	0.053959
ENSG00000102034	1.74324	-1.05084	3.54331	0.000819983	0.053959
ENSG00000137261	-0.775167	6.07409	-3.53982	0.000821169	0.053959
ENSG00000213654	1.46341	0.654445	3.53693	0.00082783	0.0541783
ENSG00000144837	1.97245	-1.30432	3.53627	0.000829502	0.0541783
ENSG00000207600	-1.19333	-0.12019	-3.53693	0.00082986	0.0541783
ENSG00000168899	1.37024	-0.682219	3.53908	0.000835604	0.0543657
ENSG00000184156	-0.645482	6.67642	-3.53518	0.000836313	0.0543657
ENSG00000199453	-1.19177	2.28799	-3.53095	0.000843225	0.0546979
ENSG00000215244	1.2307	0.584772	3.56633	0.000845696	0.0547412
ENSG00000144410	-0.88359	2.80941	-3.52666	0.000854429	0.055053
ENSG00000137507	1.95109	0.909536	3.52649	0.000854867	0.055053
ENSG00000140368	1.26876	2.38684	3.52557	0.000857296	0.055053
ENSG00000185088	0.426715	3.29287	3.54625	0.000857766	0.055053
ENSG00000164294	1.90704	-2.19712	3.52363	0.000862421	0.055235
ENSG00000118985	0.670758	4.99691	3.52293	0.000864281	0.0552376
ENSG00000207993	-1.46253	0.0420773	-3.52154	0.000868172	0.0553697
ENSG00000260466	1.69482	-3.37693	3.51865	0.000875745	0.0555194
ENSG00000267056	1.63421	-3.4703	3.5173	0.000879404	0.0555194
ENSG00000114948	-0.653358	7.43173	-3.5183	0.000881871	0.0555194
ENSG00000168405	1.70725	1.8726	3.5161	0.000882635	0.0555194
ENSG00000115657	-0.61972	3.60351	-3.5157	0.000883719	0.0555194
ENSG00000124588	-0.754396	7.25462	-3.5166	0.000884494	0.0555194
ENSG00000100226	0.462463	5.15845	3.51495	0.000885779	0.0555194
ENSG00000233608	1.83502	-2.62772	3.51485	0.000886011	0.0555194
ENSG00000185585	1.56111	0.424614	3.5145	0.000886978	0.0555194
ENSG00000214193	-0.717649	5.85161	-3.51322	0.000890457	0.0556224
ENSG00000203710	2.13598	-0.706986	3.51161	0.000894893	0.055706
ENSG00000138185	1.34143	2.682	3.5114	0.000895465	0.055706
ENSG00000267905	-1.40347	0.711149	-3.51029	0.000898526	0.0557821
ENSG00000005844	1.90975	0.455375	3.50843	0.000903652	0.0559858
ENSG00000225217	3.06892	0.00604493	3.50677	0.000908263	0.0561227
ENSG00000053328	-0.581321	3.08289	-3.50569	0.000911305	0.0561227
ENSG00000079335	1.31367	1.34234	3.50565	0.000911407	0.0561227
ENSG00000259719	1.41908	-0.523742	3.50485	0.000913645	0.0561466
ENSG00000002746	-0.922719	6.61315	-3.50494	0.000918178	0.0563112
ENSG00000094804	-0.740072	2.78284	-3.50091	0.000924757	0.0566004
ENSG00000138061	1.88569	0.688229	3.49798	0.000933091	0.0568738
ENSG00000223403	-0.928074	4.76933	-3.49751	0.000934448	0.0568738
ENSG00000145198	-1.46751	5.90753	-3.49643	0.000937538	0.0568738
ENSG00000142405	1.75815	-1.69021	3.49506	0.000941478	0.0568738
ENSG00000196616	2.36322	-1.53097	3.50222	0.000941763	0.0568738
ENSG00000184113	2.0197	0.954881	3.49442	0.00094334	0.0568738
ENSG00000131943	-0.399388	5.02069	-3.49954	0.000945146	0.0568738
ENSG00000162337	1.1932	1.81481	3.49304	0.000947319	0.0568738
ENSG00000111817	0.670281	4.71058	3.49301	0.000947409	0.0568738
ENSG00000254165	0.727909	1.69439	3.49146	0.000951906	0.0568738
ENSG00000162692	1.6723	-0.186768	3.49144	0.000951968	0.0568738
ENSG00000078549	-0.579916	6.79014	-3.49233	0.000953474	0.0568738
ENSG00000203747	2.42103	-0.267005	3.49089	0.00095358	0.0568738
ENSG00000130997	-0.498577	5.31422	-3.49018	0.000955649	0.0568854
ENSG00000213694	1.478	1.12554	3.49987	0.00096789	0.0574701
ENSG00000279124	1.8379	-1.20106	3.48481	0.000971483	0.0574701
ENSG00000111321	1.44911	1.42648	3.49067	0.000972307	0.0574701
ENSG00000126778	1.74817	-2.49299	3.48344	0.000975564	0.0574701
ENSG00000228794	-0.443045	5.43606	-3.48313	0.000976484	0.0574701
ENSG00000143514	0.806938	4.02218	3.49289	0.000977539	0.0574701
ENSG00000143630	-0.597516	5.64836	-3.48178	0.000980526	0.0574701
ENSG00000213445	1.21207	2.03551	3.48923	0.000981566	0.0574701
ENSG00000277196	1.55594	0.308356	3.48108	0.000982636	0.0574701
ENSG00000051523	1.6249	0.797086	3.47952	0.00098734	0.0574701
ENSG00000108176	-0.604373	3.18767	-3.4806	0.000987589	0.0574701
ENSG00000143851	1.62647	-1.27379	3.47883	0.000989397	0.0574701
ENSG00000145242	-1.16933	5.16579	-3.47973	0.000991187	0.0574701
ENSG00000196917	1.88399	-2.50581	3.47699	0.000995001	0.0574701
ENSG00000197444	-0.613478	6.94107	-3.47648	0.000996531	0.0574701
ENSG00000117122	1.65035	-2.34466	3.50027	0.000998125	0.0574701
ENSG00000155850	0.590347	3.78382	3.48884	0.00099822	0.0574701
ENSG00000133083	-0.801954	7.19135	-3.47641	0.000999902	0.0574701
ENSG00000161921	1.53506	0.145002	3.47135	0.00101228	0.0574701
ENSG00000172350	-0.967399	4.93439	-3.47259	0.00101276	0.0574701
ENSG00000112511	-0.455365	6.10836	-3.47079	0.00101401	0.0574701
ENSG00000128585	0.349761	6.82007	3.47075	0.00101413	0.0574701
ENSG00000173200	1.91831	-1.47768	3.47033	0.00101543	0.0574701
ENSG00000112977	0.714151	2.51598	3.47377	0.00101754	0.0574701
ENSG00000169871	1.34319	2.30202	3.46964	0.00101756	0.0574701
ENSG00000049283	-1.6583	1.36979	-3.47214	0.00101819	0.0574701
ENSG00000230844	0.641081	1.5346	3.46788	0.00102306	0.0574701
ENSG00000103832	-1.33059	0.859297	-3.46784	0.00102316	0.0574701
ENSG00000186912	1.15467	-0.524263	3.46759	0.00102395	0.0574701
ENSG00000166928	2.69786	-0.144863	3.46756	0.00102405	0.0574701
ENSG00000161638	1.37171	2.56583	3.48619	0.00102416	0.0574701
ENSG00000119138	0.724198	4.76625	3.46647	0.00102747	0.0575497
ENSG00000174996	-0.560865	6.50138	-3.46422	0.00103452	0.0577694
ENSG00000242173	-0.692351	5.56138	-3.46376	0.00103599	0.0577694
ENSG00000066427	0.301567	5.66195	3.46341	0.0010371	0.0577694
ENSG00000137462	2.11201	0.63208	3.46101	0.00104471	0.0580042
ENSG00000108798	1.96328	0.254812	3.46087	0.00104514	0.0580042
ENSG00000137819	1.64509	-0.248461	3.45889	0.00105147	0.0581573
ENSG00000102287	1.12856	1.56964	3.45901	0.00105173	0.0581573
ENSG00000122735	-0.945694	3.41147	-3.45747	0.00105603	0.0581851
ENSG00000228779	1.54874	-2.85792	3.45746	0.00105606	0.0581851
ENSG00000119004	0.380046	4.07689	3.45558	0.00106213	0.0584134
ENSG00000065613	0.417376	6.93602	3.45556	0.00106824	0.058593
ENSG00000107562	1.78098	0.791168	3.45288	0.00107091	0.058593
ENSG00000253304	1.94833	-1.71169	3.45857	0.00107119	0.058593
ENSG00000116661	-0.690206	5.43125	-3.45272	0.00107511	0.0587016
ENSG00000234805	-2.01087	-1.68312	-3.45051	0.00107864	0.0587886
ENSG00000130592	1.92326	-0.96809	3.44901	0.0010836	0.0589531
ENSG00000255587	1.58222	-3.11961	3.44762	0.00108818	0.0589903
ENSG00000171115	1.86936	0.428855	3.44686	0.0010907	0.0589903
ENSG00000184117	-0.446711	5.05561	-3.44644	0.0010921	0.0589903
ENSG00000014257	2.12021	-1.71598	3.4457	0.00109454	0.0589903
ENSG00000111252	0.633146	4.12987	3.44544	0.00109541	0.0589903
ENSG00000013364	0.956747	3.72957	3.44514	0.00109641	0.0589903
ENSG00000123609	1.82495	-1.20127	3.44335	0.00110238	0.0589903
ENSG00000069122	1.76973	1.40965	3.4433	0.00110256	0.0589903
ENSG00000189343	1.60499	-2.23721	3.44277	0.00110434	0.0589903
ENSG00000136378	1.28153	-0.332713	3.4424	0.00110559	0.0589903
ENSG00000064012	1.48313	0.446961	3.44195	0.00110709	0.0589903
ENSG00000109906	0.706611	5.607	3.4418	0.0011076	0.0589903
ENSG00000175567	1.67105	0.38382	3.44108	0.00111002	0.0590158
ENSG00000174516	-0.53474	4.58735	-3.44081	0.00111618	0.0592394
ENSG00000286159	1.45787	-2.02595	3.43737	0.00112261	0.0594769
ENSG00000261716	0.597723	3.2607	3.43617	0.0011267	0.0595307
ENSG00000203877	-0.441037	4.42171	-3.43592	0.00112755	0.0595307
ENSG00000078747	0.362188	6.71989	3.43427	0.00113323	0.0596546
ENSG00000159658	0.394418	5.51755	3.4338	0.00113485	0.0596546
ENSG00000139364	-0.90598	6.91093	-3.43474	0.00113579	0.0596546
ENSG00000165731	-1.44953	5.21092	-3.43303	0.00114416	0.0599196
ENSG00000101546	-0.441892	5.62919	-3.43029	0.00114699	0.0599196
ENSG00000076067	0.608504	4.20187	3.43025	0.00114712	0.0599196
ENSG00000117226	1.83698	0.237006	3.42979	0.00114873	0.0599196
ENSG00000140853	1.37506	2.8003	3.42814	0.00115448	0.0601161
ENSG00000128656	-0.457293	5.47074	-3.42799	0.00116157	0.0602376
ENSG00000181450	0.46987	4.29654	3.42787	0.00116332	0.0602376
ENSG00000140950	-0.428094	5.83332	-3.42587	0.00116435	0.0602376
ENSG00000155760	1.35004	-0.618096	3.43251	0.00116601	0.0602376
ENSG00000197943	1.3096	2.94113	3.42466	0.00116673	0.0602376
ENSG00000196391	-0.363448	5.37004	-3.42396	0.0011692	0.060261
ENSG00000240291	0.452248	3.31245	3.42297	0.00117273	0.060261
ENSG00000198727	1.38264	7.20169	3.42285	0.00117314	0.060261
ENSG00000261286	-0.884395	3.75052	-3.42076	0.0011806	0.0604627
ENSG00000101665	0.424894	4.78663	3.42084	0.00118123	0.0604627
ENSG00000179915	-0.404075	9.00461	-3.42611	0.00118304	0.0604627
ENSG00000228391	-1.49728	-1.48267	-3.42191	0.00118525	0.0604736
ENSG00000114978	0.498763	4.1914	3.4332	0.00118864	0.0604787
ENSG00000196183	-1.64706	-3.07079	-3.41716	0.00119356	0.0604787
ENSG00000184465	-0.367178	6.62071	-3.41686	0.00119463	0.0604787
ENSG00000240891	-0.849274	3.68564	-3.41959	0.00119499	0.0604787
ENSG00000134115	-0.916388	4.67159	-3.41745	0.00119531	0.0604787
ENSG00000157873	1.43005	1.76466	3.41504	0.00120124	0.0606569
ENSG00000231521	1.6089	-2.80472	3.4142	0.00120429	0.0606569
ENSG00000158806	-0.753685	6.09032	-3.41405	0.00120483	0.0606569
ENSG00000166006	-1.08502	4.97775	-3.41276	0.00120961	0.0607345
ENSG00000204179	-0.8971	4.06412	-3.41253	0.00121037	0.0607345
ENSG00000267121	-0.635492	4.57888	-3.41132	0.00121483	0.0607993
ENSG00000171940	1.45508	1.85761	3.41109	0.00121567	0.0607993
ENSG00000236279	-1.01665	5.0181	-3.40926	0.00122379	0.0610593
ENSG00000056972	0.750969	2.35067	3.40681	0.00123201	0.0610593
ENSG00000065485	-0.427981	3.73793	-3.40624	0.00123407	0.0610593
ENSG00000282988	1.93254	-2.65365	3.4113	0.00123675	0.0610593
ENSG00000170425	1.82297	-2.84693	3.40489	0.00123867	0.0610593
ENSG00000031081	1.22695	2.33201	3.40987	0.00124026	0.0610593
ENSG00000198863	-0.372073	5.70263	-3.40445	0.0012403	0.0610593
ENSG00000166801	1.25149	2.37967	3.40394	0.00124222	0.0610593
ENSG00000240412	-0.835104	2.03084	-3.40385	0.00124255	0.0610593
ENSG00000197471	2.03507	-0.241192	3.40321	0.00124498	0.0610593
ENSG00000150967	-0.479567	6.28381	-3.40315	0.00124522	0.0610593
ENSG00000232702	1.35787	-2.59562	3.40301	0.00124573	0.0610593
ENSG00000205221	2.07723	-1.7348	3.40267	0.00124701	0.0610593
ENSG00000132274	1.53651	2.92001	3.40002	0.00125702	0.0614103
ENSG00000132932	-0.576195	8.46522	-3.3997	0.00125823	0.0614103
ENSG00000064687	-0.722463	6.6959	-3.39821	0.0012639	0.0615665
ENSG00000184515	-0.768767	3.71168	-3.3978	0.00126548	0.0615665
ENSG00000163072	1.8847	0.771196	3.47936	0.00127168	0.0616624
ENSG00000184949	-0.604616	5.55433	-3.39602	0.00127229	0.0616624
ENSG00000169884	-0.836617	3.16899	-3.39569	0.00127355	0.0616624
ENSG00000207703	-1.57292	-1.26005	-3.39514	0.00127607	0.0616864
ENSG00000136048	1.24071	0.888296	3.39145	0.00128996	0.0621293
ENSG00000164118	0.291016	4.70029	3.3911	0.0012913	0.0621293
ENSG00000237222	-1.78327	-0.989553	-3.39337	0.00129138	0.0621293
ENSG00000163520	1.16635	1.98958	3.40592	0.00130004	0.062368
ENSG00000107859	-2.21131	-1.61161	-3.39152	0.00130045	0.062368
ENSG00000075399	-0.554003	6.22064	-3.38676	0.00130833	0.0623921
ENSG00000135899	1.44766	2.11509	3.38666	0.00130873	0.0623921
ENSG00000100906	0.679065	4.34557	3.38658	0.00130901	0.0623921
ENSG00000170989	1.64438	0.539839	3.38632	0.00131004	0.0623921
ENSG00000107099	1.58543	2.71549	3.385	0.00131528	0.0623921
ENSG00000248752	1.63014	-2.57046	3.38475	0.00131628	0.0623921
ENSG00000161860	1.45436	-1.12434	3.38427	0.00131818	0.0623921
ENSG00000088340	-1.00861	4.74864	-3.38437	0.00131831	0.0623921
ENSG00000100234	1.08067	4.04638	3.38498	0.00132019	0.0623921
ENSG00000188157	-0.872575	6.10089	-3.38343	0.0013215	0.0623921
ENSG00000068489	1.34008	-0.600883	3.38229	0.00132606	0.0624704
ENSG00000167261	1.94145	-0.88348	3.38142	0.00132952	0.0624704
ENSG00000133639	0.726787	3.2359	3.38773	0.00133084	0.0624704
ENSG00000110422	0.39465	6.28306	3.38095	0.00133139	0.0624704
ENSG00000205730	1.04917	2.67759	3.37997	0.00133535	0.0625594
ENSG00000257027	0.717067	2.28047	3.37821	0.00134245	0.0627924
ENSG00000225096	0.65319	2.47321	3.37771	0.00134446	0.0627924
ENSG00000026025	1.17359	3.63251	3.37539	0.0013543	0.0631548
ENSG00000123146	1.44441	1.908	3.37476	0.00135642	0.0631569
ENSG00000270384	-1.97319	-2.15823	-3.37208	0.00136782	0.0635902
ENSG00000138722	1.69585	-2.09275	3.37044	0.00137417	0.0637877
ENSG00000140379	2.11364	-1.77948	3.36978	0.00137691	0.063817
ENSG00000037280	1.2459	1.06643	3.36896	0.0013803	0.063859
ENSG00000162062	-0.755112	2.25784	-3.3692	0.00138244	0.063859
ENSG00000105287	0.929585	2.5694	3.36965	0.00138412	0.063859
ENSG00000166676	-0.488642	5.6393	-3.36669	0.00138973	0.0638911
ENSG00000139197	-0.399015	5.5933	-3.36804	0.00139067	0.0638911
ENSG00000204264	1.68461	0.129703	3.36636	0.00139113	0.0638911
ENSG00000085276	1.61043	1.47709	3.36548	0.0013948	0.0639627
ENSG00000135604	2.16958	-1.85974	3.36455	0.00139869	0.0640442
ENSG00000269940	0.872838	1.73069	3.37809	0.00140636	0.0642985
ENSG00000135547	1.41559	0.531189	3.36157	0.00141125	0.064425
ENSG00000167114	-0.448075	5.84709	-3.36323	0.00142139	0.0647907
ENSG00000164938	0.609647	3.37315	3.35708	0.00143048	0.065107
ENSG00000242795	2.16024	-2.19294	3.35621	0.00143564	0.0652443
ENSG00000278431	-1.45706	-1.54697	-3.35565	0.00144083	0.06531
ENSG00000234936	1.5069	-2.1218	3.38047	0.00144371	0.06531
ENSG00000234409	-1.2816	1.85311	-3.35397	0.00144379	0.06531
ENSG00000134121	-0.534269	7.58165	-3.35345	0.00144606	0.06531
ENSG00000160753	-0.589664	6.55897	-3.35304	0.00144784	0.06531
ENSG00000197627	-1.86661	-2.30124	-3.3514	0.00145494	0.0655329
ENSG00000060140	-1.49814	1.32571	-3.35008	0.00147201	0.0660273
ENSG00000100433	-0.531926	4.37401	-3.34704	0.00147408	0.0660273
ENSG00000220600	-1.25206	0.260612	-3.34699	0.0014743	0.0660273
ENSG00000124145	1.63128	0.136745	3.42685	0.00147842	0.0660273
ENSG00000067369	-0.290025	8.48678	-3.34589	0.00147917	0.0660273
ENSG00000227712	-1.80664	-0.902229	-3.3458	0.00147962	0.0660273
ENSG00000233006	-0.430428	5.5045	-3.34669	0.00148115	0.0660273
ENSG00000279946	-0.901506	2.9453	-3.34519	0.00148763	0.0662192
ENSG00000103121	-0.386476	5.38783	-3.34327	0.00149768	0.0664962
ENSG00000109610	1.51609	-1.1162	3.34161	0.00149823	0.0664962
ENSG00000171388	1.15855	0.569422	3.34013	0.0015049	0.0666946
ENSG00000182150	0.335365	6.52572	3.33988	0.00150745	0.0667099
ENSG00000104472	0.640734	2.20284	3.34188	0.00151373	0.0668216
ENSG00000187800	1.51546	1.29799	3.33775	0.00151562	0.0668216
ENSG00000178171	-0.669715	5.30662	-3.33793	0.00151657	0.0668216
ENSG00000183963	1.41809	2.51326	3.33673	0.00152026	0.0668311
ENSG00000207961	-1.69524	-0.0984602	-3.33807	0.00152341	0.0668311
ENSG00000168874	1.53186	0.529248	3.33602	0.00152348	0.0668311
ENSG00000169429	2.18072	-2.85123	3.33556	0.00152559	0.0668311
ENSG00000251179	1.45725	-1.91708	3.33443	0.00153073	0.0669595
ENSG00000225891	1.34297	-0.346744	3.3326	0.0015395	0.0672462
ENSG00000158286	-0.712298	6.67377	-3.33147	0.00154434	0.0673383
ENSG00000104689	1.80797	-1.1926	3.33064	0.00154818	0.0673383
ENSG00000150471	-0.330107	7.90455	-3.3329	0.00154826	0.0673383
ENSG00000156873	-0.342706	4.70747	-3.32899	0.0015558	0.0674041
ENSG00000125895	-0.945735	4.20321	-3.32891	0.00155621	0.0674041
ENSG00000222095	-0.935757	1.29414	-3.33093	0.00155644	0.0674041
ENSG00000132938	-0.790613	6.60065	-3.32746	0.00156294	0.067566
ENSG00000100095	-0.506075	6.57754	-3.32757	0.00156609	0.067566
ENSG00000140545	1.41645	1.98956	3.32649	0.00156746	0.067566
ENSG00000078018	-0.446285	9.88181	-3.32615	0.00156908	0.067566
ENSG00000168792	0.979302	0.502697	3.32491	0.00157487	0.0676646
ENSG00000119778	0.355377	6.83037	3.32554	0.00157682	0.0676646
ENSG00000132357	1.63461	-0.060216	3.32407	0.00157883	0.0676646
ENSG00000144671	-0.793739	3.29747	-3.32345	0.00158176	0.0676646
ENSG00000153253	-0.480032	7.74681	-3.32329	0.00158251	0.0676646
ENSG00000139629	1.06473	1.67349	3.32093	0.00159369	0.0680467
ENSG00000259523	-1.57488	-1.35727	-3.32014	0.00159742	0.0681102
ENSG00000119782	-0.690623	2.34953	-3.31916	0.00160213	0.0681434
ENSG00000154133	1.76765	0.753292	3.31904	0.00160269	0.0681434
ENSG00000011422	1.00598	2.49359	3.31758	0.00161397	0.0684854
ENSG00000143067	-0.709005	5.27043	-3.31657	0.00161526	0.0684854
ENSG00000106128	-1.34541	1.53288	-3.31595	0.0016175	0.0684854
ENSG00000256612	-0.877314	2.95237	-3.31351	0.00162932	0.0688203
ENSG00000198840	1.32651	3.67809	3.31322	0.0016307	0.0688203
ENSG00000253894	-1.01467	0.500429	-3.31287	0.00163616	0.0688203
ENSG00000274642	-0.662332	3.91215	-3.312	0.00163665	0.0688203
ENSG00000243650	1.70643	-2.82938	3.31187	0.00163745	0.0688203
ENSG00000116016	1.55739	3.24178	3.31152	0.00163901	0.0688203
ENSG00000211997	-0.93407	1.16348	-3.31037	0.00164459	0.0689166
ENSG00000179604	1.08858	1.97011	3.31012	0.00164584	0.0689166
ENSG00000235568	1.2866	0.736134	3.30757	0.00165839	0.0693461
ENSG00000130024	0.374346	5.68452	3.30635	0.00166437	0.0695008
ENSG00000125744	-0.626765	4.88415	-3.30338	0.00167916	0.070022
ENSG00000171208	-0.95893	4.00938	-3.30429	0.00168433	0.0701401
ENSG00000114279	-0.746206	5.98102	-3.30196	0.00168863	0.0701401
ENSG00000161203	-0.342873	7.29273	-3.30309	0.00168893	0.0701401
ENSG00000274536	2.08235	-2.39209	3.30023	0.00169495	0.0702941
ENSG00000105220	-0.459339	7.99817	-3.29878	0.00170227	0.0704684
ENSG00000112983	-0.345046	7.33804	-3.29856	0.00170379	0.0704684
ENSG00000165868	-0.471842	7.59275	-3.29963	0.00170798	0.0705432
ENSG00000010610	1.47133	0.60934	3.29704	0.00171108	0.0705432
ENSG00000152556	-0.463201	7.04428	-3.29632	0.00171475	0.0705432
ENSG00000171133	1.54454	-2.52544	3.29629	0.0017149	0.0705432
ENSG00000129657	0.569686	5.31775	3.2953	0.00171998	0.0705771
ENSG00000236824	-0.944898	10.4802	-3.29559	0.0017224	0.0705771
ENSG00000225783	-0.634827	10.6348	-3.29476	0.0017227	0.0705771
ENSG00000239605	1.08832	-0.576051	3.29614	0.00173093	0.0708188
ENSG00000248527	1.60237	4.09404	3.28858	0.00175461	0.0715315
ENSG00000113721	1.24818	3.6634	3.28893	0.00175545	0.0715315
ENSG00000076864	-0.644922	7.39912	-3.28886	0.00175704	0.0715315
ENSG00000168067	-0.37382	5.52671	-3.28797	0.00175777	0.0715315
ENSG00000254703	1.59297	-3.41474	3.29277	0.00176136	0.0715815
ENSG00000078098	1.81349	-1.48836	3.28676	0.0017641	0.0715969
ENSG00000124596	0.449381	3.57991	3.28428	0.0017771	0.0718349
ENSG00000180573	1.3627	2.05829	3.28417	0.00177766	0.0718349
ENSG00000134030	-0.408687	7.48081	-3.28391	0.00177944	0.0718349
ENSG00000215068	1.75479	-1.28421	3.28377	0.00177978	0.0718349
ENSG00000152601	0.476586	6.01285	3.28314	0.00178311	0.0718349
ENSG00000090975	-0.558929	5.93329	-3.28259	0.00178634	0.0718349
ENSG00000196954	2.09316	0.189436	3.2825	0.00178653	0.0718349
ENSG00000152760	-0.774994	4.62065	-3.28191	0.00178965	0.0718652
ENSG00000249487	-1.28261	-1.04255	-3.28073	0.00179589	0.0720205
ENSG00000249781	-0.85292	2.17609	-3.27845	0.00180804	0.0723627
ENSG00000177463	0.330764	6.12814	3.27824	0.00180919	0.0723627
ENSG00000265043	-1.15389	-0.0732072	-3.27659	0.00181805	0.0724675
ENSG00000067066	1.46771	2.48388	3.27656	0.00181821	0.0724675
ENSG00000126561	0.8184	3.23346	3.28631	0.00182007	0.0724675
ENSG00000267102	1.7299	-3.02153	3.27538	0.00182457	0.0724675
ENSG00000105329	1.26602	2.42052	3.27468	0.00182835	0.0724675
ENSG00000270240	-1.0478	-0.0346603	-3.27468	0.00182837	0.0724675
ENSG00000146872	0.256857	5.99499	3.27454	0.00182949	0.0724675
ENSG00000105227	1.36758	0.461551	3.27421	0.0018309	0.0724675
ENSG00000183837	-0.850035	7.07144	-3.2729	0.00183799	0.0725804
ENSG00000275064	-1.56692	2.60778	-3.2728	0.00183854	0.0725804
ENSG00000182704	1.30755	0.244037	3.27164	0.00184487	0.0726974
ENSG00000146143	0.461144	2.62062	3.27105	0.00184811	0.0726974
ENSG00000012779	1.75454	0.983268	3.27094	0.00184868	0.0726974
ENSG00000261227	-0.639785	3.32059	-3.26836	0.00186347	0.0729956
ENSG00000156345	-0.510025	5.3187	-3.26767	0.00186665	0.0729956
ENSG00000232453	1.44822	-2.21724	3.26739	0.00186821	0.0729956
ENSG00000278828	1.60287	-2.01607	3.26639	0.00187374	0.0729956
ENSG00000139625	-0.452657	7.12852	-3.26576	0.00187723	0.0729956
ENSG00000125089	1.6072	1.11923	3.26457	0.00188382	0.0729956
ENSG00000123240	-0.464451	7.32751	-3.26452	0.00188415	0.0729956
ENSG00000176124	1.25262	1.6151	3.26444	0.00188457	0.0729956
ENSG00000138867	0.402671	3.78985	3.27011	0.00188492	0.0729956
ENSG00000145362	-0.321308	9.80497	-3.26561	0.00188627	0.0729956
ENSG00000133246	1.11563	1.87033	3.26389	0.00188759	0.0729956
ENSG00000185201	1.89313	-1.58596	3.28146	0.00188802	0.0729956
ENSG00000207942	-1.56355	0.815481	-3.26365	0.00188892	0.0729956
ENSG00000250994	-1.15588	-0.537906	-3.26321	0.0018914	0.0729956
ENSG00000173137	-0.531998	3.84981	-3.26304	0.00189234	0.0729956
ENSG00000176014	1.27995	0.578131	3.26219	0.00189709	0.0730039
ENSG00000184678	1.33631	1.44941	3.29604	0.00189736	0.0730039
ENSG00000240809	-0.820856	5.34508	-3.26067	0.00190565	0.0731312
ENSG00000230951	-0.938675	2.69558	-3.26062	0.00190591	0.0731312
ENSG00000104974	2.50496	-1.37986	3.26027	0.0019079	0.0731312
ENSG00000182674	-1.26007	4.03049	-3.25943	0.00191264	0.0732207
ENSG00000249307	1.06194	1.82362	3.25772	0.00192228	0.0732743
ENSG00000148356	-0.404953	6.43247	-3.25739	0.00192416	0.0732743
ENSG00000173898	-0.647153	7.67975	-3.25731	0.00192463	0.0732743
ENSG00000224257	-1.34841	0.30001	-3.25893	0.00192517	0.0732743
ENSG00000144339	-0.560075	5.83619	-3.25705	0.00192611	0.0732743
ENSG00000117682	-0.516863	6.76036	-3.25567	0.00193396	0.0734807
ENSG00000131042	1.985	-0.205645	3.2545	0.00194065	0.073495
ENSG00000078401	1.00032	1.87779	3.2544	0.00194124	0.073495
ENSG00000119906	0.391094	7.16235	3.2576	0.00194237	0.073495
ENSG00000168575	0.338538	6.07067	3.25391	0.00194402	0.073495
ENSG00000196542	-1.14319	2.31743	-3.25355	0.00194659	0.0735008
ENSG00000199390	-0.893857	2.5357	-3.25516	0.00194934	0.0735131
ENSG00000128342	1.78809	-3.22163	3.25164	0.00195708	0.0735923
ENSG00000269113	1.80418	-0.995421	3.25104	0.00196057	0.0735923
ENSG00000204277	-1.20301	0.0802957	-3.25094	0.00196113	0.0735923
ENSG00000273449	1.14652	-1.08385	3.25024	0.00196519	0.0735923
ENSG00000184508	-0.512653	3.18509	-3.25059	0.00196796	0.0735923
ENSG00000198435	1.39846	0.395381	3.27949	0.00197117	0.0735923
ENSG00000142185	-0.710298	7.7738	-3.24803	0.00197799	0.0735923
ENSG00000165995	-0.399411	6.39242	-3.24846	0.00197992	0.0735923
ENSG00000229359	-1.03472	2.09981	-3.24759	0.00198058	0.0735923
ENSG00000277559	1.31113	-0.805938	3.24874	0.00198294	0.0735923
ENSG00000167173	0.670982	3.30161	3.24707	0.00198364	0.0735923
ENSG00000166441	0.413431	4.30923	3.24649	0.00198699	0.0735923
ENSG00000204103	1.79126	1.54667	3.24622	0.00198859	0.0735923
ENSG00000186517	1.72792	0.7717	3.24614	0.00198906	0.0735923
ENSG00000153208	1.00109	4.30811	3.24521	0.00199451	0.0735923
ENSG00000137872	-0.954149	6.28367	-3.24664	0.00199631	0.0735923
ENSG00000130589	1.16999	1.54016	3.24454	0.00199842	0.0735923
ENSG00000153551	1.51185	-0.34465	3.24403	0.00200147	0.0735923
ENSG00000162645	1.98727	0.73387	3.24358	0.0020041	0.0735923
ENSG00000154760	1.4648	-0.41566	3.24351	0.0020045	0.0735923
ENSG00000279253	1.18778	0.782183	3.24342	0.00200503	0.0735923
ENSG00000254498	-1.02259	0.827053	-3.2433	0.00200577	0.0735923
ENSG00000166352	-0.527409	4.3933	-3.24277	0.00200887	0.0735923
ENSG00000170293	1.70537	-1.8858	3.24265	0.00200962	0.0735923
ENSG00000240692	-0.892324	1.20617	-3.24102	0.00201923	0.0737846
ENSG00000234626	2.02794	-1.44769	3.24094	0.00201973	0.0737846
ENSG00000105518	-0.705361	3.8428	-3.24041	0.0020229	0.073785
ENSG00000183762	0.482619	3.36378	3.24663	0.00202638	0.073785
ENSG00000164300	0.584949	5.57653	3.25444	0.00202784	0.073785
ENSG00000175538	1.4033	-0.31566	3.23926	0.00202976	0.073785
ENSG00000167202	0.372181	5.42467	3.2389	0.00203189	0.073785
ENSG00000111728	-0.474504	5.8619	-3.23925	0.00203838	0.0739321
ENSG00000213203	1.91623	-1.49915	3.23707	0.00204287	0.0739923
ENSG00000115825	1.09661	2.12063	3.23673	0.00204492	0.0739923
ENSG00000101298	-0.620423	6.80157	-3.23707	0.00204822	0.074018
ENSG00000138496	1.45184	1.90753	3.23554	0.00205205	0.074018
ENSG00000225031	1.12741	-0.768759	3.23495	0.00205559	0.074018
ENSG00000148400	1.20186	3.2077	3.23489	0.00205597	0.074018
ENSG00000143847	-0.704773	8.06411	-3.23381	0.00206254	0.074018
ENSG00000114554	-0.622281	7.63034	-3.23322	0.00207146	0.074018
ENSG00000159403	1.43009	1.75654	3.23191	0.00207409	0.074018
ENSG00000128284	1.56403	0.686418	3.23185	0.00207441	0.074018
ENSG00000227288	-1.13997	1.40741	-3.23131	0.00207774	0.074018
ENSG00000071967	1.34538	1.37792	3.23098	0.00207976	0.074018
ENSG00000263165	0.795623	0.801157	3.23096	0.00207984	0.074018
ENSG00000283078	-0.692722	1.20915	-3.23052	0.00208254	0.074018
ENSG00000102575	1.63911	-2.65821	3.2303	0.00208392	0.074018
ENSG00000184557	1.71005	0.273576	3.22999	0.00208577	0.074018
ENSG00000166800	-1.36116	0.317249	-3.22992	0.0020862	0.074018
ENSG00000142347	1.66904	1.69109	3.22945	0.00208913	0.074018
ENSG00000254416	1.90866	-2.42098	3.22957	0.00208928	0.074018
ENSG00000176490	-0.814659	4.06536	-3.23145	0.00208951	0.074018
ENSG00000082556	-0.855663	3.12272	-3.23033	0.00209285	0.0740323
ENSG00000245384	-0.986216	1.8128	-3.22852	0.00209479	0.0740323
ENSG00000272031	-0.519883	3.79583	-3.22707	0.00210732	0.0743027
ENSG00000268388	1.85563	-0.848859	3.22649	0.00210734	0.0743027
ENSG00000103811	0.594913	3.84935	3.22574	0.00211196	0.0743792
ENSG00000110852	1.63757	-1.66263	3.22492	0.00211707	0.0744642
ENSG00000000938	1.7214	0.648148	3.22448	0.00211978	0.0744642
ENSG00000244187	-0.545446	2.35227	-3.22432	0.00212405	0.0744642
ENSG00000163995	-0.59186	6.419	-3.22378	0.00212418	0.0744642
ENSG00000197448	-0.554214	5.80954	-3.22358	0.00212807	0.0745144
ENSG00000213876	1.53816	-3.81781	3.22551	0.00213057	0.0745158
ENSG00000255693	-0.671267	4.75029	-3.22181	0.00213644	0.0746353
ENSG00000245904	1.25843	0.0865379	3.2232	0.00213919	0.0746455
ENSG00000230417	-0.833023	4.78133	-3.22083	0.00214517	0.0747039
ENSG00000147065	1.292	3.92559	3.24342	0.00214655	0.0747039
ENSG00000172845	0.370989	5.53076	3.21993	0.00214825	0.0747039
ENSG00000257621	0.344834	6.49816	3.21985	0.00215509	0.0748559
ENSG00000166578	0.868238	1.24619	3.21828	0.00215951	0.0748628
ENSG00000165138	-0.546588	6.92635	-3.21804	0.00216022	0.0748628
ENSG00000104722	-1.05292	8.38484	-3.21824	0.00216409	0.0749116
ENSG00000073756	1.53054	0.619285	3.21585	0.00217411	0.0751725
ENSG00000207133	-0.787508	3.17811	-3.21545	0.0021797	0.0752514
ENSG00000198786	1.39557	8.11269	3.21472	0.00218134	0.0752514
ENSG00000116299	-0.576959	5.45228	-3.21381	0.00218736	0.0753635
ENSG00000106462	0.460026	2.8779	3.21969	0.00218956	0.0753635
ENSG00000179603	-1.09943	4.83285	-3.21287	0.00219316	0.0754019
ENSG00000149418	1.45863	-0.655342	3.21186	0.00219968	0.0754914
ENSG00000125967	-0.457835	5.44735	-3.21169	0.00220073	0.0754914
ENSG00000284664	1.19849	-0.492152	3.21097	0.0022054	0.0755661
ENSG00000273032	-0.936325	4.76206	-3.20916	0.00221709	0.0756986
ENSG00000123411	-0.336437	5.15354	-3.20929	0.00221906	0.0756986
ENSG00000166527	1.82086	-2.93841	3.20885	0.00221916	0.0756986
ENSG00000198712	1.1887	7.59495	3.20883	0.00221924	0.0756986
ENSG00000273077	1.50811	-2.24388	3.20782	0.00222941	0.0758954
ENSG00000107745	-0.339091	6.82381	-3.20779	0.00223001	0.0758954
ENSG00000131697	-0.427172	6.21312	-3.20617	0.0022366	0.0760345
ENSG00000148600	-0.876187	5.20824	-3.20474	0.0022517	0.076426
ENSG00000106367	-0.524744	2.8051	-3.20506	0.00225316	0.076426
ENSG00000169071	1.28523	-0.650646	3.21877	0.00225754	0.0764894
ENSG00000006534	1.67868	-0.109736	3.20245	0.00226103	0.076507
ENSG00000133019	-0.761333	5.27567	-3.20214	0.0022631	0.076507
ENSG00000241684	1.10971	2.8214	3.20173	0.00226594	0.0765176
ENSG00000237289	-0.986327	6.55135	-3.20131	0.00226863	0.0765235
ENSG00000169908	1.63069	-0.0341712	3.20062	0.00227317	0.0765915
ENSG00000144406	-0.545779	9.54941	-3.19887	0.00228481	0.0768171
ENSG00000225092	1.48481	0.193777	3.1995	0.00228493	0.0768171
ENSG00000134531	1.41577	0.924633	3.19793	0.0022911	0.0769393
ENSG00000006432	-0.457078	7.12026	-3.19731	0.00229524	0.0769934
ENSG00000113319	0.722969	6.03496	3.19663	0.00229997	0.0770004
ENSG00000134853	1.36198	2.18242	3.23239	0.00230053	0.0770004
ENSG00000273521	1.54948	-1.92613	3.19576	0.00230594	0.0770965
ENSG00000135926	0.978529	2.77088	3.19459	0.0023136	0.0772677
ENSG00000139132	0.44259	6.0522	3.19401	0.00231746	0.0773113
ENSG00000172782	-0.747462	4.02005	-3.193	0.00232436	0.0774403
ENSG00000124575	1.69387	-0.475233	3.19269	0.00232642	0.0774403
ENSG00000114019	0.489134	5.39798	3.19072	0.00233982	0.0777748
ENSG00000005884	-0.528914	6.25307	-3.19033	0.00234372	0.0777748
ENSG00000157557	0.608943	5.61774	3.19009	0.00234416	0.0777748
ENSG00000184384	0.838045	5.21563	3.18927	0.00234987	0.0778373
ENSG00000260565	-0.362902	7.43722	-3.18906	0.00235117	0.0778373
ENSG00000104903	1.83793	-0.421019	3.18846	0.00235532	0.0778896
ENSG00000164308	1.26675	1.16098	3.18714	0.00236443	0.0781059
ENSG00000144681	-0.980979	2.9836	-3.18791	0.00236738	0.0781184
ENSG00000114450	1.14019	2.26573	3.20517	0.00237438	0.0782644
ENSG00000112297	1.08505	1.89785	3.18428	0.00238415	0.0784184
ENSG00000135298	-0.348022	7.98554	-3.18393	0.00238661	0.0784184
ENSG00000154814	-0.361363	5.48806	-3.18463	0.0023868	0.0784184
ENSG00000167613	1.97974	0.433346	3.18344	0.00239003	0.0784394
ENSG00000075624	0.761215	7.81417	3.18784	0.00239496	0.0785164
ENSG00000204282	1.44563	0.191266	3.18185	0.00240112	0.0786336
ENSG00000284513	-1.21442	2.05355	-3.18328	0.00240604	0.0786977
ENSG00000105143	-0.802417	3.50538	-3.18083	0.00240827	0.0786977
ENSG00000137962	0.562465	5.50447	3.17977	0.00241568	0.0788552
ENSG00000277103	-0.747476	4.19357	-3.17892	0.00242167	0.0789656
ENSG00000168077	1.26801	1.65801	3.17616	0.00244121	0.0794481
ENSG00000185947	0.6333	3.10276	3.17609	0.0024417	0.0794481
ENSG00000104870	1.72322	1.07661	3.17572	0.00244437	0.0794499
ENSG00000262686	-1.58161	-2.20257	-3.1749	0.00245027	0.0794796
ENSG00000178695	0.861015	4.18065	3.17433	0.00245428	0.0794796
ENSG00000247240	0.948048	0.0440733	3.1741	0.0024559	0.0794796
ENSG00000081237	2.00793	1.69396	3.17389	0.00245741	0.0794796
ENSG00000197324	1.21571	2.08529	3.18007	0.00245862	0.0794796
ENSG00000069493	0.500304	3.20164	3.17339	0.00246099	0.0794796
ENSG00000170011	-0.9131	5.55175	-3.17391	0.00246577	0.0795492
ENSG00000188730	-0.618873	4.76683	-3.17231	0.00246884	0.0795639
ENSG00000186340	0.819201	3.67797	3.17078	0.0024797	0.0797269
ENSG00000174292	-1.25478	0.274847	-3.17021	0.00248383	0.0797269
ENSG00000121858	1.93394	-0.958951	3.16996	0.00248561	0.0797269
ENSG00000134317	-0.701244	4.28997	-3.16953	0.00248894	0.0797269
ENSG00000196843	1.14437	1.28223	3.16905	0.00249221	0.0797269
ENSG00000085741	-1.08699	1.46196	-3.17049	0.00249583	0.0797269
ENSG00000277268	-0.835206	3.45352	-3.1685	0.0024962	0.0797269
ENSG00000251408	-0.800796	2.59246	-3.16815	0.00249875	0.0797269
ENSG00000020633	1.84459	-1.58288	3.16791	0.0025005	0.0797269
ENSG00000042062	1.22125	2.3478	3.16767	0.00250238	0.0797269
ENSG00000134686	0.325544	6.19297	3.16759	0.00250279	0.0797269
ENSG00000168000	-0.51043	3.91371	-3.16706	0.00250927	0.0798496
ENSG00000160111	0.932425	2.47122	3.16521	0.00252015	0.0801117
ENSG00000149782	0.847084	2.41079	3.16392	0.0025296	0.0803198
ENSG00000173013	-0.714907	2.63186	-3.16359	0.00253207	0.0803198
ENSG00000269720	1.55242	-2.31864	3.16324	0.00253463	0.0803198
ENSG00000149972	-0.945924	5.17289	-3.1646	0.00254851	0.0806156
ENSG00000258861	-1.17121	2.56834	-3.16122	0.00254954	0.0806156
ENSG00000283297	1.45687	-2.87312	3.1609	0.00255193	0.0806156
ENSG00000156639	0.309712	5.2517	3.16161	0.0025588	0.0807485
ENSG00000182179	1.20739	1.82678	3.15854	0.00256945	0.0809201
ENSG00000152558	1.17832	1.32368	3.15827	0.00257146	0.0809201
ENSG00000189403	0.368561	5.88488	3.15875	0.00257224	0.0809201
ENSG00000178175	1.61442	0.43664	3.1575	0.0025772	0.0809316
ENSG00000278218	-1.63105	-2.50431	-3.15822	0.00257833	0.0809316
ENSG00000135870	0.254835	7.0017	3.15677	0.00258267	0.0809316
ENSG00000079101	-1.2256	2.27881	-3.15669	0.00258326	0.0809316
ENSG00000283765	1.48272	-2.92087	3.15492	0.00259652	0.0810906
ENSG00000256463	1.54245	0.929688	3.15489	0.00259673	0.0810906
ENSG00000095787	0.267715	6.65123	3.15442	0.0026003	0.0810906
ENSG00000085563	1.23216	2.71968	3.15437	0.00260069	0.0810906
ENSG00000124782	1.22334	5.09265	3.15492	0.00260169	0.0810906
ENSG00000132563	-0.544934	6.41395	-3.15424	0.00260522	0.0811173
ENSG00000173198	1.57754	-1.79576	3.15304	0.00261072	0.0811329
ENSG00000267339	0.971923	0.472942	3.15232	0.00261616	0.0811329
ENSG00000225470	0.464828	5.3709	3.15423	0.00261761	0.0811329
ENSG00000141574	1.95249	-2.46465	3.15093	0.00262675	0.0811329
ENSG00000080709	-0.741288	4.07865	-3.15157	0.00262686	0.0811329
ENSG00000066056	1.26742	0.700424	3.15082	0.00262756	0.0811329
ENSG00000166965	-0.55427	5.529	-3.15086	0.002629	0.0811329
ENSG00000008282	0.732464	2.50327	3.15021	0.0026322	0.0811329
ENSG00000006740	-0.477221	6.97482	-3.15018	0.00263243	0.0811329
ENSG00000202374	-0.812374	0.982527	-3.15091	0.00263245	0.0811329
ENSG00000154065	-0.756728	4.74571	-3.15076	0.00263742	0.0811528
ENSG00000270863	-0.815604	3.14013	-3.1494	0.00263844	0.0811528
ENSG00000117318	1.60594	-0.175174	3.14877	0.00264319	0.0812164
ENSG00000018869	0.391281	3.21967	3.14842	0.00264593	0.0812185
ENSG00000163040	-0.893164	3.05026	-3.14785	0.00265029	0.0812702
ENSG00000229543	-1.03016	1.32604	-3.1484	0.00265748	0.0813137
ENSG00000123908	0.33767	7.33738	3.14649	0.00266304	0.0813137
ENSG00000072818	0.855839	0.835935	3.14593	0.00266506	0.0813137
ENSG00000198763	1.39795	6.89377	3.14418	0.00267854	0.0813137
ENSG00000173653	-0.483184	3.28273	-3.14411	0.00267915	0.0813137
ENSG00000108352	-0.615887	6.83075	-3.14404	0.00267964	0.0813137
ENSG00000280237	-0.511221	6.3231	-3.14405	0.00268137	0.0813137
ENSG00000136250	1.21822	2.40281	3.14345	0.00268423	0.0813137
ENSG00000018280	1.63072	2.21993	3.14514	0.0026856	0.0813137
ENSG00000007968	1.98301	-2.91321	3.1423	0.0026932	0.0813137
ENSG00000172020	-0.7397	5.39467	-3.14239	0.00269455	0.0813137
ENSG00000134569	1.2381	3.06561	3.14169	0.00269793	0.0813137
ENSG00000108395	-0.390723	7.44941	-3.14151	0.00269932	0.0813137
ENSG00000146278	0.55362	5.00445	3.14146	0.00269973	0.0813137
ENSG00000215218	-0.609886	4.07005	-3.1436	0.00270009	0.0813137
ENSG00000010319	1.58087	1.19871	3.14134	0.00270068	0.0813137
ENSG00000279601	-1.47163	-0.45936	-3.14084	0.00270454	0.0813137
ENSG00000180370	0.407305	5.27826	3.14076	0.00270523	0.0813137
ENSG00000094963	2.35468	0.118655	3.16435	0.00270574	0.0813137
ENSG00000159685	-0.499805	5.0094	-3.14056	0.00270675	0.0813137
ENSG00000124574	-0.409185	5.97396	-3.14041	0.00270796	0.0813137
ENSG00000105696	-0.600608	6.26579	-3.13985	0.00271235	0.0813653
ENSG00000113140	1.19356	3.68786	3.15224	0.00271601	0.0813946
ENSG00000260310	1.39705	-3.55298	3.13828	0.00272469	0.081574
ENSG00000283602	1.25505	-1.69506	3.1375	0.00273084	0.0816776
ENSG00000145428	-0.605355	4.57008	-3.13604	0.00274237	0.0819417
ENSG00000148362	-0.513454	3.65378	-3.13356	0.00276208	0.0823942
ENSG00000116711	1.60958	0.136017	3.13345	0.00276294	0.0823942
ENSG00000260892	1.35122	-2.74729	3.13175	0.00277654	0.0826367
ENSG00000106682	0.334923	5.40854	3.13655	0.00277969	0.0826367
ENSG00000149582	-0.452297	5.46988	-3.1309	0.00278337	0.0826367
ENSG00000164398	-0.435673	7.28057	-3.13082	0.00278403	0.0826367
ENSG00000136518	0.604626	1.90256	3.13074	0.00278468	0.0826367
ENSG00000133026	-0.450094	8.7621	-3.13014	0.00278951	0.0826992
ENSG00000141338	1.34481	3.79173	3.12925	0.00279661	0.0828289
ENSG00000163703	-0.432956	6.56664	-3.12848	0.00280284	0.0829323
ENSG00000256690	1.49024	-2.06437	3.12692	0.00281552	0.0832264
ENSG00000249896	-0.536839	3.0632	-3.12573	0.00283265	0.0835754
ENSG00000262668	-1.29817	0.485197	-3.12502	0.00283283	0.0835754
ENSG00000135636	-0.84437	6.06143	-3.12391	0.00284055	0.0836673
ENSG00000206727	-0.904183	2.94234	-3.12436	0.00284146	0.0836673
ENSG00000160469	-0.463128	7.10189	-3.123	0.00284748	0.0837634
ENSG00000170430	-0.423749	4.73113	-3.12169	0.00285825	0.0839913
ENSG00000173372	1.76196	-1.043	3.12124	0.00286198	0.0839913
ENSG00000283217	-1.74878	0.620081	-3.1225	0.00286353	0.0839913
ENSG00000182698	-1.42592	-0.231955	-3.1203	0.00286972	0.0840917
ENSG00000164603	-0.386893	4.94935	-3.11987	0.00287332	0.0841158
ENSG00000156384	1.0063	0.874155	3.12528	0.00287683	0.0841376
ENSG00000151650	1.73654	-1.76116	3.11853	0.0028844	0.0842714
ENSG00000161652	-1.70069	-1.53731	-3.11822	0.00288696	0.0842714
ENSG00000137942	-0.482403	7.29359	-3.11831	0.00289549	0.0844393
ENSG00000004468	1.48108	-0.706614	3.11677	0.00289904	0.0844617
ENSG00000165379	-0.423352	6.57909	-3.11454	0.00291776	0.0848845
ENSG00000102265	1.67395	0.122541	3.11435	0.00291937	0.0848845
ENSG00000097021	-0.488098	5.61311	-3.11461	0.00292419	0.0848845
ENSG00000181211	-0.998833	3.64887	-3.11502	0.00292474	0.0848845
ENSG00000143947	0.610882	4.34138	3.1123	0.00293659	0.085147
ENSG00000183579	0.426509	3.52043	3.11383	0.00293955	0.0851517
ENSG00000181690	0.79884	2.19829	3.11044	0.00295232	0.08544
ENSG00000005059	1.3431	-0.244178	3.10844	0.00296936	0.0858511
ENSG00000140553	-0.478064	6.28439	-3.10693	0.00298233	0.0859947
ENSG00000271984	1.59441	-1.16683	3.10691	0.00298248	0.0859947
ENSG00000101460	-0.549996	5.1564	-3.10667	0.00298453	0.0859947
ENSG00000276517	0.428727	4.34888	3.10654	0.00298565	0.0859947
ENSG00000241231	1.68062	-3.08507	3.10473	0.00300121	0.0862423
ENSG00000111877	0.348484	4.6215	3.1047	0.00300149	0.0862423
ENSG00000075340	-0.535137	8.07472	-3.10408	0.00300684	0.0862423
ENSG00000198203	1.77884	0.0541288	3.1034	0.00301271	0.0862423
ENSG00000270441	0.906567	0.929253	3.10302	0.00301596	0.0862423
ENSG00000265206	1.57412	-0.776379	3.10265	0.00301923	0.0862423
ENSG00000101000	1.50587	-1.95861	3.10251	0.0030204	0.0862423
ENSG00000198914	0.738857	4.66906	3.10214	0.00302428	0.0862423
ENSG00000130822	-0.725895	5.39046	-3.10188	0.00302589	0.0862423
ENSG00000106819	1.56896	-2.02056	3.10181	0.00302652	0.0862423
ENSG00000230773	1.37814	-1.58993	3.10146	0.00302949	0.0862423
ENSG00000079215	1.39514	3.82832	3.12578	0.00303032	0.0862423
ENSG00000215808	2.03588	-2.3436	3.10127	0.00303118	0.0862423
ENSG00000178764	0.632378	3.89668	3.10116	0.00303657	0.0863148
ENSG00000120693	0.73595	4.57382	3.09976	0.00304438	0.0864141
ENSG00000169758	-0.668514	4.38985	-3.09945	0.00304707	0.0864141
ENSG00000171860	1.89052	-2.22577	3.09846	0.00305576	0.0864141
ENSG00000163602	0.499637	4.46551	3.0977	0.00306239	0.0864141
ENSG00000157150	1.33999	-1.2124	3.09735	0.00306552	0.0864141
ENSG00000126583	-1.16062	4.67973	-3.0973	0.0030659	0.0864141
ENSG00000222343	-1.47844	-0.0763031	-3.0993	0.00306776	0.0864141
ENSG00000171606	0.43821	4.52805	3.09711	0.00306781	0.0864141
ENSG00000236383	1.38573	-2.46288	3.09676	0.00307069	0.0864141
ENSG00000214309	-0.75233	2.93025	-3.09653	0.00307268	0.0864141
ENSG00000152518	1.54705	1.86599	3.09623	0.00307536	0.0864141
ENSG00000153558	-0.400375	5.30295	-3.09762	0.00307589	0.0864141
ENSG00000163823	2.09159	-1.72744	3.09603	0.00307707	0.0864141
ENSG00000256043	0.783149	1.88374	3.09382	0.00309666	0.0866368
ENSG00000244754	0.318805	8.74636	3.09341	0.00310085	0.0866368
ENSG00000156150	1.32511	-2.14713	3.09306	0.00310339	0.0866368
ENSG00000258910	-2.14068	0.827432	-3.09407	0.00310704	0.0866368
ENSG00000129467	1.41963	1.45406	3.09421	0.00311051	0.0866368
ENSG00000137100	-0.282318	4.75281	-3.09183	0.00311638	0.0866368
ENSG00000080854	-0.559473	6.57939	-3.09133	0.00311881	0.0866368
ENSG00000187908	1.54802	-0.414792	3.18542	0.00312111	0.0866368
ENSG00000136286	1.64	1.28613	3.09101	0.00312171	0.0866368
ENSG00000120690	1.13492	2.36856	3.09098	0.00312201	0.0866368
ENSG00000156508	0.717938	5.89664	3.09078	0.00312377	0.0866368
ENSG00000199107	-1.19404	0.0393941	-3.09073	0.00312417	0.0866368
ENSG00000119514	-0.640447	4.31287	-3.09053	0.00312604	0.0866368
ENSG00000232040	-0.552657	3.95483	-3.08999	0.00313084	0.0866368
ENSG00000227057	-0.462865	4.88101	-3.08987	0.00313191	0.0866368
ENSG00000152822	-0.739759	6.24977	-3.09282	0.00313329	0.0866368
ENSG00000133561	1.72882	-0.587465	3.09649	0.00313613	0.0866368
ENSG00000088320	1.621	-2.76033	3.08938	0.00313637	0.0866368
ENSG00000141469	2.10572	0.172506	3.08812	0.00314765	0.0868614
ENSG00000225434	1.87062	-2.75528	3.08724	0.00315563	0.0868614
ENSG00000117724	0.754349	1.25546	3.10254	0.00315932	0.0868614
ENSG00000158856	-0.568906	6.52797	-3.08673	0.00316018	0.0868614
ENSG00000206145	-1.41532	0.333997	-3.08649	0.00316239	0.0868614
ENSG00000169126	0.840654	0.530693	3.0864	0.00316316	0.0868614
ENSG00000152049	1.01162	1.20355	3.08625	0.00316453	0.0868614
ENSG00000185532	-0.481814	6.23477	-3.08588	0.0031679	0.0868755
ENSG00000171681	0.307799	7.11145	3.0854	0.0031723	0.0869175
ENSG00000103111	0.311197	4.8484	3.08462	0.0031794	0.0870336
ENSG00000256235	1.02249	0.655585	3.08299	0.00319565	0.0873817
ENSG00000162076	-0.437192	4.19271	-3.08259	0.00319788	0.0873817
ENSG00000165923	1.72045	-1.42574	3.08512	0.00320356	0.0874584
ENSG00000198938	1.19535	6.94484	3.08153	0.00320758	0.0874894
ENSG00000177409	1.94716	1.25772	3.08087	0.00321365	0.0874978
ENSG00000234810	1.74216	-1.99466	3.08087	0.00321365	0.0874978
ENSG00000103174	-0.482698	4.99578	-3.07991	0.00322245	0.0876088
ENSG00000070061	-0.332585	7.63839	-3.0798	0.0032235	0.0876088
ENSG00000103145	-0.607463	3.30423	-3.07929	0.00322826	0.0876273
ENSG00000162551	1.43373	-0.752527	3.07893	0.00323155	0.0876273
ENSG00000163359	1.31526	2.48117	3.07879	0.00323284	0.0876273
ENSG00000166068	0.448509	5.63375	3.07756	0.00324422	0.0876659
ENSG00000117245	-0.922857	3.80381	-3.07756	0.00324426	0.0876659
ENSG00000054654	0.774858	5.66158	3.0775	0.00324476	0.0876659
ENSG00000260658	-2.05297	0.477758	-3.07953	0.00324582	0.0876659
ENSG00000166796	-1.73029	-2.99041	-3.07703	0.00324911	0.0876769
ENSG00000137968	-0.687984	4.89141	-3.07738	0.0032558	0.0877779
ENSG00000144749	0.646392	4.30438	3.07601	0.00325864	0.0877779
ENSG00000221955	-0.916862	3.43172	-3.07522	0.003266	0.0878982
ENSG00000204390	0.776148	0.909779	3.07478	0.00327007	0.0879146
ENSG00000155659	2.53111	-0.932832	3.0901	0.0032724	0.0879146
ENSG00000145214	-0.574151	5.8548	-3.07335	0.00328347	0.0881339
ENSG00000148730	0.30464	5.92673	3.07262	0.00329035	0.0882406
ENSG00000169442	1.64952	-2.91302	3.0723	0.00329334	0.088243
ENSG00000274667	0.951198	-0.55071	3.07192	0.0032969	0.0882605
ENSG00000134352	0.419628	6.45417	3.06978	0.0033174	0.0885153
ENSG00000230580	-1.47575	-0.997259	-3.06973	0.00331762	0.0885153
ENSG00000167994	1.01	1.8279	3.06971	0.00331779	0.0885153
ENSG00000142611	0.662934	2.96204	3.07001	0.00331809	0.0885153
ENSG00000145934	-0.967437	6.27187	-3.06977	0.00332727	0.0885876
ENSG00000093134	1.62712	-3.27138	3.06867	0.00332873	0.0885876
ENSG00000225938	1.77543	-2.87687	3.06847	0.00332955	0.0885876
ENSG00000121691	1.13123	1.64111	3.06782	0.00333576	0.088675
ENSG00000231678	1.39806	-2.88393	3.06681	0.0033454	0.0888536
ENSG00000087085	-0.78733	5.61388	-3.06667	0.003351	0.0889245
ENSG00000146021	-0.32807	7.24105	-3.06587	0.00335459	0.0889421
ENSG00000260401	1.81579	-2.75763	3.06535	0.00335935	0.0889905
ENSG00000199968	-1.29154	0.433805	-3.06644	0.00336691	0.089113
ENSG00000256008	-1.46335	-0.0225821	-3.06528	0.00337122	0.0891493
ENSG00000178996	0.607914	4.36483	3.06365	0.00337565	0.0891889
ENSG00000089775	0.256363	5.69103	3.07528	0.00338239	0.0891894
ENSG00000128534	0.372661	5.35231	3.06284	0.00338343	0.0891894
ENSG00000136235	1.68314	1.06009	3.08743	0.00338449	0.0891894
ENSG00000011465	1.41906	2.33753	3.06169	0.00339459	0.0893387
ENSG00000146826	-0.460752	4.88539	-3.0611	0.00340026	0.0893387
ENSG00000231768	1.58222	-2.33751	3.06068	0.0034044	0.0893387
ENSG00000070729	-1.17155	4.22161	-3.06047	0.00340638	0.0893387
ENSG00000187266	0.700042	1.89163	3.06033	0.00340772	0.0893387
ENSG00000186818	1.85407	-0.449219	3.05986	0.00341232	0.0893387
ENSG00000115652	-0.431624	6.32957	-3.0597	0.00341383	0.0893387
ENSG00000221963	1.15729	2.74764	3.05933	0.00341752	0.0893387
ENSG00000103966	0.939802	2.55017	3.05924	0.00341835	0.0893387
ENSG00000206195	1.87843	-2.07027	3.05898	0.00342091	0.0893387
ENSG00000286260	1.45072	-1.54535	3.058	0.00343061	0.0893387
ENSG00000145703	1.15212	2.35278	3.05786	0.00343179	0.0893387
ENSG00000026508	1.38013	2.26768	3.05782	0.00343224	0.0893387
ENSG00000123552	-0.435331	5.72103	-3.05855	0.00343504	0.0893387
ENSG00000183605	-0.302258	4.73961	-3.05721	0.00343815	0.0893387
ENSG00000274105	1.19516	-1.18332	3.08292	0.0034401	0.0893387
ENSG00000173535	1.42358	-3.42186	3.057	0.00344018	0.0893387
ENSG00000110057	1.63018	0.327332	3.10643	0.00345559	0.0896621
ENSG00000134516	1.49873	3.11938	3.05502	0.00345964	0.0896906
ENSG00000100796	0.251311	6.44553	3.05141	0.00350068	0.090551
ENSG00000258651	-1.06788	-0.310628	-3.05047	0.00350473	0.090551
ENSG00000180353	1.40601	2.66781	3.05018	0.00350765	0.090551
ENSG00000265527	1.59484	-0.443066	3.05012	0.00350822	0.090551
ENSG00000135535	0.53616	5.53122	3.05006	0.00350886	0.090551
ENSG00000106404	0.804173	2.14338	3.04982	0.00351159	0.090551
ENSG00000185274	-0.768624	4.92751	-3.0496	0.00351371	0.090551
ENSG00000177663	0.622026	4.68045	3.04877	0.00352177	0.0905893
ENSG00000101222	-1.08724	0.828617	-3.04869	0.00352337	0.0905893
ENSG00000132182	-0.38058	6.60564	-3.05187	0.00352414	0.0905893
ENSG00000273621	-1.05878	-0.0645186	-3.04648	0.00355167	0.0910935
ENSG00000285529	-1.27527	0.299583	-3.04606	0.00355549	0.0910935
ENSG00000261747	-1.77389	-2.12666	-3.04514	0.00355823	0.0910935
ENSG00000111145	1.44843	0.514978	3.06845	0.00355882	0.0910935
ENSG00000140030	1.81205	-2.02463	3.06351	0.00355891	0.0910935
ENSG00000162039	1.18485	-0.78872	3.04433	0.0035665	0.0910935
ENSG00000124228	-0.412374	7.44022	-3.04524	0.00356774	0.0910935
ENSG00000204991	-0.580423	6.55277	-3.0442	0.00356777	0.0910935
ENSG00000234981	-1.15616	0.574118	-3.04362	0.00357363	0.0911665
ENSG00000213642	-0.796277	2.30861	-3.04265	0.00358352	0.0912661
ENSG00000006118	-0.41385	6.42236	-3.04265	0.00358354	0.0912661
ENSG00000151414	0.706707	3.10527	3.0419	0.0035912	0.0912662
ENSG00000127561	-0.66654	5.03859	-3.04189	0.00359301	0.0912662
ENSG00000122966	-0.583104	9.05081	-3.04159	0.00359433	0.0912662
ENSG00000198331	-0.623906	2.66955	-3.04147	0.00359557	0.0912662
ENSG00000131355	1.51203	-2.86327	3.04047	0.00360582	0.0914498
ENSG00000260232	-0.654275	3.16326	-3.03949	0.00361586	0.0915631
ENSG00000137252	-1.00989	1.57779	-3.04157	0.00361632	0.0915631
ENSG00000127084	1.16493	1.78776	3.03902	0.00362067	0.0915968
ENSG00000084710	-0.30894	7.58206	-3.03916	0.0036271	0.0916832
ENSG00000104524	-0.462446	3.01838	-3.03801	0.00363941	0.0919177
ENSG00000118620	0.282704	4.69265	3.03691	0.00364243	0.0919177
ENSG00000188191	-0.732473	6.20662	-3.03711	0.00365199	0.0920165
ENSG00000223834	1.60328	-1.52764	3.03901	0.00365389	0.0920165
ENSG00000163291	-0.370053	5.60786	-3.03706	0.00365544	0.0920165
ENSG00000104894	1.52555	1.091	3.03504	0.00366178	0.0920987
ENSG00000177674	0.995975	1.30657	3.03435	0.00366898	0.0920987
ENSG00000115267	1.25748	0.860039	3.03428	0.00366964	0.0920987
ENSG00000271425	0.908761	2.6757	3.03417	0.00367084	0.0920987
ENSG00000077080	-0.556991	4.73083	-3.03325	0.00368039	0.0922189
ENSG00000150361	-1.09508	5.4637	-3.03377	0.00368171	0.0922189
ENSG00000103034	-0.538385	8.4514	-3.0326	0.00368716	0.0922793
ENSG00000276203	-0.839345	2.77593	-3.03225	0.00369715	0.0924531
ENSG00000198804	1.24611	9.47984	3.03041	0.00371019	0.0924921
ENSG00000284713	-0.7652	2.85572	-3.03018	0.00371256	0.0924921
ENSG00000162374	-0.569142	5.84237	-3.0311	0.00371301	0.0924921
ENSG00000167207	1.12306	0.597114	3.03003	0.00371418	0.0924921
ENSG00000268758	2.05281	-1.75401	3.03779	0.0037167	0.0924921
ENSG00000164654	0.331373	5.31628	3.03055	0.00371903	0.0924921
ENSG00000122482	0.374391	6.10041	3.02921	0.0037228	0.0924921
ENSG00000104081	0.553843	2.35124	3.02876	0.00372749	0.0924921
ENSG00000162618	1.71729	-1.08274	3.02851	0.00373017	0.0924921
ENSG00000112559	1.66835	-1.72528	3.02801	0.00373546	0.0924921
ENSG00000145555	0.793626	4.64889	3.0275	0.00374089	0.0924921
ENSG00000135378	1.232	-1.12283	3.02732	0.00374275	0.0924921
ENSG00000138399	-0.391189	5.84186	-3.02772	0.00374333	0.0924921
ENSG00000119771	-0.626445	5.5061	-3.0281	0.00374407	0.0924921
ENSG00000224273	-1.41704	1.82388	-3.02716	0.00374441	0.0924921
ENSG00000248596	-1.43675	-0.911918	-3.0264	0.00375251	0.0926167
ENSG00000148357	-1.23104	4.78708	-3.02522	0.00376869	0.0928526
ENSG00000230223	-1.33156	2.05016	-3.02478	0.00376973	0.0928526
ENSG00000162825	-0.544346	4.79935	-3.02464	0.00377124	0.0928526
ENSG00000116285	0.423008	4.47063	3.02603	0.00378177	0.0930365
ENSG00000255581	-1.07473	1.19959	-3.02412	0.00378692	0.0930878
ENSG00000099999	-0.368603	5.52719	-3.02522	0.00379415	0.0931899
ENSG00000176387	-1.10352	0.408742	-3.02188	0.00380082	0.0932076
ENSG00000163016	-0.478601	4.54353	-3.02282	0.00380264	0.0932076
ENSG00000149577	0.387048	6.34993	3.02784	0.00380472	0.0932076
ENSG00000226476	1.31163	0.313415	3.02112	0.00380907	0.0932076
ENSG00000262943	-1.13868	5.09539	-3.02241	0.00381022	0.0932076
ENSG00000167363	-0.414644	6.44346	-3.01914	0.00383036	0.0935396
ENSG00000113810	0.830556	2.54105	3.01891	0.00383288	0.0935396
ENSG00000240240	-0.641345	3.93483	-3.01986	0.00383558	0.0935396
ENSG00000159216	1.50594	2.04919	3.0181	0.00384174	0.0935396
ENSG00000232354	1.44194	-1.23398	3.01782	0.00384475	0.0935396
ENSG00000224078	-0.381799	12.2393	-3.01768	0.00384625	0.0935396
ENSG00000137824	-0.302954	5.47103	-3.01813	0.00384856	0.0935396
ENSG00000164879	-0.809373	1.66879	-3.01708	0.00385413	0.0935396
ENSG00000115457	1.30977	0.924014	3.01691	0.00385771	0.0935396
ENSG00000174021	1.31492	-0.570179	3.01645	0.00385967	0.0935396
ENSG00000143740	-0.335486	4.67161	-3.01801	0.00386048	0.0935396
ENSG00000147434	-1.43173	1.34528	-3.01772	0.00386077	0.0935396
ENSG00000164736	1.52817	-2.12856	3.01603	0.00386428	0.0935502
ENSG00000200163	-1.15791	1.16695	-3.01663	0.00387881	0.0938271
ENSG00000201247	-1.20355	3.2427	-3.01469	0.00388423	0.0938556
ENSG00000100364	-0.544843	8.45409	-3.01391	0.00388747	0.0938556
ENSG00000159640	-0.72829	2.97187	-3.01374	0.00388926	0.0938556
ENSG00000024422	1.44675	0.841491	3.01669	0.00390128	0.0939752
ENSG00000204227	-0.396581	5.68234	-3.01258	0.00390212	0.0939752
ENSG00000141506	1.6347	0.808093	3.01229	0.00390527	0.0939752
ENSG00000170075	1.20671	1.84684	3.01207	0.0039077	0.0939752
ENSG00000181722	0.522733	6.50258	3.02054	0.00391249	0.0939752
ENSG00000081138	-0.797287	4.91746	-3.01154	0.00392273	0.0939752
ENSG00000233875	0.904792	-0.27644	3.00925	0.00393899	0.0939752
ENSG00000180530	0.424989	5.28632	3.00897	0.00394209	0.0939752
ENSG00000071282	0.940157	2.21248	3.00894	0.00394234	0.0939752
ENSG00000255624	-0.785495	1.3937	-3.00841	0.00394828	0.0939752
ENSG00000169860	1.25244	0.738574	3.00824	0.00395023	0.0939752
ENSG00000131781	1.30066	1.34516	3.00816	0.00395107	0.0939752
ENSG00000152804	1.70861	-1.29795	3.0079	0.00395397	0.0939752
ENSG00000133574	1.44802	0.580563	3.00784	0.00395464	0.0939752
ENSG00000083454	-0.685712	2.73064	-3.00801	0.00395513	0.0939752
ENSG00000280239	1.03882	0.198941	3.00982	0.00395835	0.0939752
ENSG00000147202	0.563751	4.56352	3.00743	0.00396001	0.0939752
ENSG00000124731	1.73389	-1.80187	3.00735	0.00396015	0.0939752
ENSG00000258457	1.35913	-1.86705	3.0073	0.00396066	0.0939752
ENSG00000122223	1.79276	-2.40411	3.01906	0.00396125	0.0939752
ENSG00000102081	0.291586	6.26924	3.0163	0.00396583	0.0939752
ENSG00000182752	-0.841826	3.5589	-3.00824	0.00396649	0.0939752
ENSG00000005243	0.938651	0.360882	3.01942	0.00396773	0.0939752
ENSG00000143878	0.777601	5.25794	3.00968	0.00396852	0.0939752
ENSG00000080345	0.335175	7.24434	3.00585	0.00397688	0.0940373
ENSG00000164690	-0.599252	3.91295	-3.00581	0.00397733	0.0940373
ENSG00000183484	1.29358	0.353279	3.00515	0.00398481	0.0941408
ENSG00000126215	0.637957	1.62892	3.00414	0.00399615	0.0942798
ENSG00000078081	-0.992776	0.354187	-3.00455	0.00399691	0.0942798
ENSG00000165424	1.20771	2.69208	3.00258	0.00401378	0.094366
ENSG00000154721	0.873437	1.81485	3.00252	0.00401447	0.094366
ENSG00000105383	2.29047	-0.474625	3.00189	0.00402151	0.094366
ENSG00000212907	1.3892	5.12092	3.00129	0.00402834	0.094366
ENSG00000186094	-0.516413	5.67446	-3.00124	0.00402899	0.094366
ENSG00000168280	-0.242495	8.72443	-3.00072	0.00403489	0.094366
ENSG00000232004	-1.15029	-0.606635	-3.00047	0.00403766	0.094366
ENSG00000142552	1.14756	2.06537	3.00046	0.00403781	0.094366
ENSG00000182255	-0.729456	4.61209	-3.00036	0.00403891	0.094366
ENSG00000211459	1.03434	7.36999	3.0003	0.00403963	0.094366
ENSG00000178878	1.13155	2.55427	2.99981	0.00404522	0.094366
ENSG00000227337	-1.26336	-0.980928	-2.99964	0.00404714	0.094366
ENSG00000114656	-1.01874	3.46156	-2.99908	0.00405348	0.094366
ENSG00000095752	-1.14371	2.28366	-2.99895	0.00405504	0.094366
ENSG00000135931	-0.345647	5.95504	-2.99859	0.00405915	0.094366
ENSG00000136305	1.55346	-0.510391	2.99852	0.00405993	0.094366
ENSG00000106077	-0.539487	2.67252	-2.99816	0.00406408	0.094366
ENSG00000285427	1.26712	-1.42748	2.99781	0.00406808	0.094366
ENSG00000258947	-0.6282	3.43795	-2.99937	0.00407408	0.094366
ENSG00000135577	-1.68085	-0.197796	-2.9966	0.00408199	0.094366
ENSG00000102349	-0.554692	4.61142	-2.99649	0.0040855	0.094366
ENSG00000131669	0.538955	2.65788	3.00056	0.0040938	0.094366
ENSG00000198848	1.68629	-2.13008	2.99502	0.00410013	0.094366
ENSG00000180448	0.975393	3.27866	2.99481	0.00410261	0.094366
ENSG00000267541	1.29313	-1.28483	2.99478	0.00410291	0.094366
ENSG00000175215	0.486037	5.96904	2.99473	0.00410493	0.094366
ENSG00000263069	-0.591634	4.58245	-2.99427	0.00410878	0.094366
ENSG00000110077	2.35003	0.453406	2.99422	0.00410937	0.094366
ENSG00000265531	2.18508	-2.29013	2.99754	0.00411197	0.094366
ENSG00000184428	-0.620165	5.49016	-2.99362	0.00411628	0.094366
ENSG00000140279	-1.83597	1.01642	-2.99433	0.00411971	0.094366
ENSG00000197279	-0.937962	2.01748	-2.9939	0.00412005	0.094366
ENSG00000109881	-0.729406	3.62931	-2.99319	0.00412124	0.094366
ENSG00000121068	1.56249	0.649727	2.99301	0.0041234	0.094366
ENSG00000281406	-1.29054	3.20505	-2.99303	0.00412467	0.094366
ENSG00000105613	-0.647004	8.04437	-2.99279	0.00412598	0.094366
ENSG00000140968	1.54485	1.74391	2.99273	0.00412662	0.094366
ENSG00000160062	1.07483	0.500173	2.99268	0.00412773	0.094366
ENSG00000189190	0.94572	1.46554	2.99235	0.00413102	0.094366
ENSG00000240207	-0.555284	5.02839	-2.99314	0.00413198	0.094366
ENSG00000060138	1.10519	3.07033	2.99245	0.00413572	0.094366
ENSG00000167536	-0.425811	4.23221	-2.9919	0.0041363	0.094366
ENSG00000278561	-1.2681	1.85287	-2.99254	0.00413897	0.094366
ENSG00000247157	-0.597582	4.21697	-2.99158	0.00414005	0.094366
ENSG00000207460	-0.782026	4.92133	-2.99182	0.00414697	0.094366
ENSG00000267041	0.569292	1.80613	2.9909	0.00414793	0.094366
ENSG00000177954	0.500502	3.59978	2.99073	0.00414988	0.094366
ENSG00000119820	0.319659	5.96058	2.99067	0.00415067	0.094366
ENSG00000149256	-0.426323	6.98905	-2.99066	0.00415288	0.094366
ENSG00000140995	-0.414983	7.16672	-2.98992	0.00415944	0.0944179
ENSG00000132688	1.19214	2.56705	2.98975	0.00416138	0.0944179
ENSG00000148291	-0.471923	2.55821	-2.98825	0.00417901	0.0947471
ENSG00000100365	1.82443	-0.84868	2.98611	0.00420428	0.0949586
ENSG00000206656	-0.788421	2.77246	-2.98592	0.00420643	0.0949586
ENSG00000222844	-1.04541	0.251257	-2.98582	0.00420764	0.0949586
ENSG00000004399	1.1531	3.87479	2.98576	0.0042083	0.0949586
ENSG00000123374	1.11593	-0.23574	2.98524	0.00421449	0.0949586
ENSG00000130751	-1.12609	2.142	-2.9852	0.00421493	0.0949586
ENSG00000196275	0.557066	2.64419	2.98555	0.00421541	0.0949586
ENSG00000136944	-1.97886	2.81678	-2.98606	0.00421631	0.0949586
ENSG00000259690	-0.826756	2.31915	-2.98507	0.00421649	0.0949586
ENSG00000165643	-1.60759	1.48785	-2.98458	0.00422223	0.0950175
ENSG00000123728	0.568072	2.99904	2.98334	0.00423696	0.0952782
ENSG00000166171	-0.436026	3.6092	-2.98286	0.00424273	0.0953069
ENSG00000205413	1.05376	1.86381	2.98245	0.00424763	0.0953069
ENSG00000127445	-0.385805	6.10956	-2.98336	0.00424845	0.0953069
ENSG00000235499	1.36724	-1.43919	2.98211	0.00425171	0.0953069
ENSG00000183654	-0.695989	3.04878	-2.98187	0.00425448	0.0953069
ENSG00000251467	0.673935	0.871574	2.98166	0.00425707	0.0953069
ENSG00000128596	-0.758304	8.14398	-2.98077	0.00426772	0.0954749
ENSG00000142632	1.12465	-1.05479	2.97989	0.00427819	0.0955102
ENSG00000075420	0.627495	4.525	2.97989	0.0042782	0.0955102
ENSG00000137845	0.376036	6.3889	2.97996	0.00428316	0.0955102
ENSG00000229770	-1.01925	1.3844	-2.97947	0.00428327	0.0955102
ENSG00000139926	0.790575	3.45409	2.98101	0.00428503	0.0955102
ENSG00000087077	0.91871	1.10998	2.97855	0.00429438	0.0956483
ENSG00000160188	-0.649132	4.21425	-2.97777	0.00430372	0.0957862
ENSG00000178573	0.909376	3.97265	2.97685	0.00431492	0.0958881
ENSG00000184838	-1.21255	3.54	-2.97734	0.0043189	0.0958881
ENSG00000134802	1.16762	0.60863	2.9764	0.00432037	0.0958881
ENSG00000207762	-1.18602	-0.174187	-2.97699	0.00432358	0.0958881
ENSG00000163638	1.47771	2.8184	2.97601	0.00432512	0.0958881
ENSG00000109927	-0.389147	5.09111	-2.97583	0.00432725	0.0958881
ENSG00000285752	-1.44083	-2.76692	-2.97499	0.00433748	0.0960446
ENSG00000145526	-0.815184	6.08611	-2.9744	0.00434467	0.0961337
ENSG00000163462	-0.51074	5.55184	-2.97256	0.00436717	0.0965205
ENSG00000123154	-0.368314	3.71765	-2.97265	0.00436851	0.0965205
ENSG00000161249	-0.813735	5.16152	-2.97196	0.00437452	0.096583
ENSG00000105483	1.11997	3.42586	2.97079	0.00438886	0.0968291
ENSG00000121807	1.8177	-2.88023	2.96991	0.00439969	0.0969918
ENSG00000255517	1.21612	-0.620084	2.97013	0.00440262	0.0969918
ENSG00000166450	0.871929	2.88676	2.96934	0.00440664	0.09701
ENSG00000160072	-0.449903	6.29948	-2.969	0.00441497	0.0970983
ENSG00000198886	1.33596	8.25667	2.9685	0.00441705	0.0970983
ENSG00000101350	-0.267357	6.04308	-2.96816	0.00442132	0.0971218
ENSG00000077264	-0.514794	8.01492	-2.96647	0.00444219	0.0975097
ENSG00000254901	0.439849	3.37431	2.96551	0.00445425	0.0975655
ENSG00000143502	-0.432673	6.01038	-2.9655	0.00445427	0.0975655
ENSG00000149136	-0.313467	6.21895	-2.96533	0.00445644	0.0975655
ENSG00000250630	-1.08767	-0.822124	-2.9659	0.00445927	0.0975655
ENSG00000149452	1.45839	-2.7262	2.96491	0.00446172	0.0975655
ENSG00000276045	1.22449	-0.689716	2.96987	0.00446401	0.0975655
ENSG00000115461	0.990592	4.35792	2.96426	0.0044698	0.0976217
ENSG00000162931	-1.03588	4.03016	-2.96258	0.0044909	0.0979512
ENSG00000104972	1.95514	-0.0391747	2.96239	0.00449329	0.0979512
ENSG00000226543	-1.48955	-2.15377	-2.96222	0.00449544	0.0979512
ENSG00000267281	0.972746	-1.21935	2.96196	0.0044986	0.0979512
ENSG00000112769	1.04471	3.85013	2.96365	0.00450169	0.0979512
ENSG00000186160	-1.11913	2.0795	-2.96152	0.00450425	0.0979512
ENSG00000172986	0.698037	2.11572	2.97492	0.00451605	0.0979813
ENSG00000177105	0.965105	1.56085	2.96058	0.00451611	0.0979813
ENSG00000259434	1.56905	-2.63455	2.96047	0.00451745	0.0979813
ENSG00000230823	-0.730886	3.01475	-2.96043	0.00451854	0.0979813
ENSG00000137770	0.293129	5.26103	2.95964	0.00452789	0.0980987
ENSG00000248479	-1.4516	0.560488	-2.95944	0.00453042	0.0980987
ENSG00000145016	-0.231962	7.46865	-2.95923	0.00453922	0.0982153
ENSG00000244482	1.93221	-1.8988	2.95851	0.00454227	0.0982153
ENSG00000228473	-1.45527	-2.29759	-2.958	0.00454871	0.0982444
ENSG00000244623	1.36441	-2.6243	2.95889	0.00455123	0.0982444
ENSG00000103569	1.80617	-2.73308	2.95764	0.00455333	0.0982444
ENSG00000148935	-0.527891	4.41078	-2.95735	0.00455701	0.0982541
ENSG00000072736	0.326518	5.32708	2.95639	0.00456919	0.0984468
ENSG00000241399	1.13349	-0.384512	2.95591	0.00457535	0.0985095
ENSG00000250846	-1.00859	2.89667	-2.95614	0.00459016	0.0987585
ENSG00000100342	1.53597	0.0138906	2.95446	0.00459392	0.0987692
ENSG00000255026	1.31596	-3.07325	2.95408	0.0045988	0.0988042
ENSG00000089101	-0.599304	3.08216	-2.9537	0.00460368	0.0988099
ENSG00000095066	-0.621149	7.19332	-2.95441	0.00460557	0.0988099
ENSG00000130303	1.85592	0.395798	2.9531	0.00461142	0.0988508
ENSG00000204682	-0.683094	2.23833	-2.954	0.00461582	0.0988508
ENSG00000203414	1.24138	-2.11356	2.95251	0.00461902	0.0988508
ENSG00000267575	-0.444377	4.98408	-2.9524	0.0046205	0.0988508
ENSG00000256904	-1.21545	-2.47195	-2.95059	0.00464384	0.0992802
ENSG00000053524	-0.401242	7.62035	-2.95149	0.00465334	0.0993439
ENSG00000278983	-0.525305	4.22757	-2.94926	0.00466117	0.0993439
ENSG00000146192	1.72324	1.42708	2.94904	0.00466395	0.0993439
ENSG00000087903	0.4954	3.18024	2.9495	0.00466604	0.0993439
ENSG00000188177	0.33743	6.31128	2.95062	0.00466633	0.0993439
ENSG00000178796	-0.833294	1.55231	-2.94885	0.0046665	0.0993439
ENSG00000163320	0.383253	4.76443	2.9486	0.00466973	0.0993439
ENSG00000106123	-0.874664	4.79066	-2.94779	0.0046802	0.0994969
ENSG00000151746	-0.317328	7.76053	-2.94736	0.00468582	0.0995467
ENSG00000139192	0.63441	3.11173	2.94753	0.00469328	0.099626
ENSG00000179583	1.13496	3.38405	2.94658	0.00469612	0.099626
ENSG00000129646	-0.566994	6.75684	-2.9463	0.00469974	0.0996331
ENSG00000231329	1.24245	-1.81167	2.95956	0.00470972	0.0997752
ENSG00000177181	-0.496844	5.22885	-2.94542	0.00472289	0.0999557
ENSG00000164038	-0.287735	5.35228	-2.9476	0.00472871	0.0999557
ENSG00000214533	-0.784404	1.41365	-2.94383	0.00473219	0.0999557
ENSG00000162496	1.34746	0.576663	2.94355	0.00473587	0.0999557
ENSG00000105877	1.02752	1.53311	2.94682	0.00473778	0.0999557
ENSG00000136830	1.09498	1.4594	2.94973	0.004738	0.0999557
ENSG00000176769	-0.839018	4.29811	-2.9423	0.00475239	0.100165
ENSG00000173889	0.228603	7.72695	2.94214	0.00475452	0.100165
ENSG00000231863	-0.8995	2.1773	-2.94168	0.0047607	0.100226
ENSG00000090339	1.27655	0.502551	2.94069	0.00477377	0.100414
ENSG00000173267	-0.888636	5.67299	-2.94145	0.00477899	0.100414
ENSG00000175161	-0.341343	7.3202	-2.94026	0.00477957	0.100414
ENSG00000233730	-1.14396	-1.04079	-2.93978	0.00478595	0.100478
ENSG00000070388	-0.701018	2.01984	-2.93854	0.00480347	0.100717
ENSG00000137936	0.457	3.44556	2.93843	0.00480394	0.100717
ENSG00000200832	-0.982194	0.035709	-2.9374	0.00483865	0.101375
ENSG00000180185	-0.404887	3.52353	-2.93585	0.00484447	0.101427
ENSG00000163867	0.290844	4.50709	2.93355	0.00486967	0.101772
ENSG00000131981	1.49552	-0.452716	2.93334	0.0048725	0.101772
ENSG00000234883	1.38091	-3.13898	2.93328	0.00487335	0.101772
ENSG00000110844	-0.450701	7.02475	-2.9332	0.00487438	0.101772
ENSG00000053254	0.268127	5.86527	2.93517	0.00488559	0.101936
ENSG00000166986	-0.268581	7.05929	-2.93195	0.00489131	0.101946
ENSG00000141510	0.802105	1.87816	2.93184	0.00489278	0.101946
ENSG00000202499	-0.748875	2.06787	-2.92956	0.00492395	0.102452
ENSG00000213722	0.694549	1.54236	2.92937	0.0049266	0.102452
ENSG00000140497	0.419695	4.05426	2.92923	0.00492847	0.102452
ENSG00000120708	1.48215	1.42583	2.92883	0.00493393	0.102452
ENSG00000113805	-0.47352	5.75726	-2.92883	0.00493394	0.102452
ENSG00000185105	-0.914172	0.673901	-2.92787	0.00494707	0.10265
ENSG00000171791	0.585448	4.58386	2.92818	0.00495026	0.10265
ENSG00000258498	1.58612	-1.22051	2.92704	0.00495855	0.102672
ENSG00000236760	-0.873819	1.65285	-2.92692	0.00496023	0.102672
ENSG00000108947	-0.862066	4.11996	-2.92632	0.0049685	0.102672
ENSG00000186862	-0.695727	6.11547	-2.92578	0.0049759	0.102672
ENSG00000205726	-0.30979	8.54217	-2.92568	0.00497724	0.102672
ENSG00000115325	0.918238	0.495751	2.92544	0.00498066	0.102672
ENSG00000167721	-0.270092	5.55236	-2.92532	0.00498225	0.102672
ENSG00000168487	0.694516	2.80793	2.92526	0.00498305	0.102672
ENSG00000071127	0.533256	5.27537	2.92714	0.00498478	0.102672
ENSG00000138002	-0.41607	8.04328	-2.92509	0.00498545	0.102672
ENSG00000133519	-0.742624	3.5897	-2.92487	0.00498851	0.102672
ENSG00000160460	-0.597897	8.94652	-2.92462	0.00503396	0.103537
ENSG00000137752	1.80816	-0.0483854	2.92099	0.00504258	0.103581
ENSG00000229064	-1.32083	-2.2516	-2.92096	0.00504293	0.103581
ENSG00000111077	0.634411	5.39226	2.91972	0.00506038	0.103749
ENSG00000169231	-0.479195	4.96774	-2.91946	0.00506392	0.103749
ENSG00000182870	-0.580279	5.36136	-2.91915	0.00506828	0.103749
ENSG00000249743	1.42208	-3.28574	2.91899	0.00507057	0.103749
ENSG00000236358	-0.876919	2.9656	-2.91953	0.00507287	0.103749
ENSG00000274884	-0.901619	1.23939	-2.91831	0.00508017	0.103749
ENSG00000273014	0.906367	0.696849	2.91864	0.00508276	0.103749
ENSG00000264717	-1.52885	-2.27538	-2.91843	0.00508366	0.103749
ENSG00000271913	-0.461932	3.37811	-2.91776	0.00508785	0.103749
ENSG00000239653	0.570521	3.52303	2.91778	0.00509277	0.103749
ENSG00000235296	-0.889076	3.42261	-2.91735	0.00509371	0.103749
ENSG00000182223	-2.30764	0.0131183	-2.91838	0.00509533	0.103749
ENSG00000285741	-1.33033	0.27752	-2.91694	0.00509943	0.103749
ENSG00000254349	-0.813142	3.12793	-2.92052	0.00509989	0.103749
ENSG00000139044	-0.670866	4.34184	-2.91663	0.00510388	0.103749
ENSG00000156381	-0.461843	3.99924	-2.91735	0.00510578	0.103749
ENSG00000164867	1.25136	1.79997	2.91444	0.00513492	0.104272
ENSG00000272144	1.43421	-2.89678	2.91315	0.00515334	0.104576
ENSG00000164669	-0.554787	4.48733	-2.91263	0.00516079	0.104597
ENSG00000136514	1.45893	-2.4764	2.91259	0.00516126	0.104597
ENSG00000137802	-0.469025	7.56103	-2.91194	0.00517063	0.104716
ENSG00000205424	1.46766	-2.40873	2.91881	0.0051761	0.104757
ENSG00000157554	1.4587	0.0910461	2.91093	0.00518511	0.104828
ENSG00000125398	0.824815	3.14515	2.9114	0.00518987	0.104828
ENSG00000172940	-0.694205	2.41448	-2.91024	0.005195	0.104828
ENSG00000183549	1.47876	-0.787146	2.91003	0.00519804	0.104828
ENSG00000126522	-0.408715	4.79739	-2.9096	0.00520425	0.104828
ENSG00000207569	-0.786635	2.50462	-2.9095	0.0052057	0.104828
ENSG00000168264	0.43771	5.22201	2.9098	0.00520628	0.104828
ENSG00000008324	-0.715852	1.86777	-2.90923	0.0052096	0.104828
ENSG00000184988	0.947649	2.80793	2.90904	0.00521229	0.104828
ENSG00000170873	0.295392	7.02828	2.909	0.00521413	0.104828
ENSG00000283913	-0.572607	2.73399	-2.90808	0.0052262	0.105001
ENSG00000221838	-0.45525	3.53417	-2.90764	0.00523254	0.105013
ENSG00000167037	-0.37029	7.64485	-2.90766	0.00523372	0.105013
ENSG00000109667	1.02858	1.42036	2.90713	0.00523989	0.105068
ENSG00000141646	0.302222	5.3064	2.90662	0.00524732	0.105135
ENSG00000109686	0.509761	5.69183	2.90642	0.00525016	0.105135
ENSG00000037042	-0.414703	6.72295	-2.90613	0.00525445	0.105142
ENSG00000155366	1.02097	1.28541	2.90592	0.00525745	0.105142
ENSG00000285589	0.710213	1.45584	2.9054	0.005265	0.105211
ENSG00000173212	-0.975866	2.33241	-2.90477	0.00527428	0.105211
ENSG00000162873	-1.11519	4.48702	-2.90458	0.00527786	0.105211
ENSG00000280429	1.39151	-3.50367	2.90441	0.0052795	0.105211
ENSG00000086289	-0.492685	5.1583	-2.9054	0.00528632	0.105211
ENSG00000035862	0.467759	7.06404	2.90356	0.00529884	0.105211
ENSG00000235545	-0.651619	1.7689	-2.90307	0.00529908	0.105211
ENSG00000125355	-1.02772	4.20406	-2.90428	0.00530102	0.105211
ENSG00000157483	1.11541	3.3191	2.90289	0.00530174	0.105211
ENSG00000170545	1.40564	-1.47545	2.9026	0.00530603	0.105211
ENSG00000135316	0.296457	5.95367	2.90241	0.0053087	0.105211
ENSG00000251372	1.74323	-3.36018	2.90205	0.00531468	0.105211
ENSG00000138030	-0.518132	3.31471	-2.90196	0.00531532	0.105211
ENSG00000229473	1.30654	-0.791759	2.96782	0.00531698	0.105211
ENSG00000133619	-0.490954	5.29049	-2.90159	0.00532083	0.105211
ENSG00000163482	-0.429695	6.51715	-2.90144	0.00532297	0.105211
ENSG00000166523	1.51264	-2.71504	2.90116	0.0053272	0.105211
ENSG00000206803	1.58638	-2.2912	2.90262	0.00532882	0.105211
ENSG00000205784	1.74803	-1.9706	2.92278	0.0053291	0.105211
ENSG00000068615	-0.469861	5.9041	-2.90079	0.00533284	0.105211
ENSG00000066294	1.71065	0.293693	2.90072	0.00533368	0.105211
ENSG00000109113	1.37346	-0.743006	2.90024	0.00534078	0.105283
ENSG00000257480	1.21505	-2.00959	2.89937	0.00536168	0.105397
ENSG00000235012	-0.806148	1.96715	-2.89844	0.00536729	0.105397
ENSG00000179399	-1.03071	5.2716	-2.89778	0.00537863	0.105397
ENSG00000173275	-0.72196	5.05085	-2.89731	0.00538416	0.105397
ENSG00000169926	0.510808	4.773	2.89705	0.00538804	0.105397
ENSG00000132437	-1.92211	2.75605	-2.89764	0.00538817	0.105397
ENSG00000259707	-0.529138	3.49576	-2.89695	0.0053894	0.105397
ENSG00000139160	0.488372	2.11129	2.89678	0.00539199	0.105397
ENSG00000099860	1.05029	2.01879	2.8966	0.00539462	0.105397
ENSG00000160447	1.26774	0.201479	2.89576	0.00540718	0.105397
ENSG00000076826	-0.647315	4.9738	-2.89566	0.00540867	0.105397
ENSG00000163349	0.328863	6.12239	2.89532	0.00541374	0.105397
ENSG00000143320	-0.748361	3.19447	-2.89519	0.00541571	0.105397
ENSG00000106034	1.1826	1.79653	2.91615	0.00541611	0.105397
ENSG00000168887	0.401694	4.64665	2.89611	0.00541957	0.105397
ENSG00000214212	1.34526	-0.326398	2.89491	0.00541994	0.105397
ENSG00000128394	1.55695	-1.14493	2.89486	0.0054206	0.105397
ENSG00000178075	0.790441	2.97214	2.89485	0.00542074	0.105397
ENSG00000110324	1.34811	2.61723	2.89483	0.00542114	0.105397
ENSG00000281706	-1.05272	1.63488	-2.89474	0.00542241	0.105397
ENSG00000104970	1.63437	-2.83472	2.89468	0.00542333	0.105397
ENSG00000142623	-1.04011	1.12403	-2.89589	0.00543341	0.105397
ENSG00000123095	0.460805	5.62191	2.89392	0.00543472	0.105397
ENSG00000267002	-0.432988	6.6045	-2.89368	0.00543837	0.105397
ENSG00000253771	-0.474555	5.24081	-2.89353	0.00544057	0.105397
ENSG00000214562	1.27187	-0.206483	2.89338	0.00544288	0.105397
ENSG00000242082	-0.842056	3.56129	-2.89358	0.00544526	0.105397
ENSG00000173826	-1.02564	1.64839	-2.89311	0.00544694	0.105397
ENSG00000029534	-0.590583	7.76577	-2.89308	0.00544728	0.105397
ENSG00000137801	1.0627	4.23768	2.89181	0.00546645	0.105648
ENSG00000172578	1.52506	0.360327	2.89172	0.00546779	0.105648
ENSG00000196323	0.360304	5.47911	2.89132	0.0054739	0.105648
ENSG00000279166	1.194	2.77564	2.8913	0.00547415	0.105648
ENSG00000167011	-1.11948	1.7551	-2.89135	0.00547895	0.105654
ENSG00000248890	-0.43506	2.56101	-2.89034	0.00548871	0.105654
ENSG00000248668	0.879838	-0.218576	2.89019	0.00549093	0.105654
ENSG00000255319	-1.35479	-0.875872	-2.88994	0.00549484	0.105654
ENSG00000226650	-0.781158	2.72595	-2.88966	0.00549903	0.105654
ENSG00000180176	-1.88814	4.36005	-2.88963	0.00549954	0.105654
ENSG00000237139	1.4931	-2.75539	2.9033	0.00550495	0.105654
ENSG00000132681	1.63745	-1.59514	2.89135	0.00550501	0.105654
ENSG00000006016	-1.23802	-1.06338	-2.88916	0.00550652	0.105654
ENSG00000163682	0.391065	4.37271	2.89139	0.00550927	0.105654
ENSG00000135046	1.63899	1.07499	2.88797	0.00552462	0.105881
ENSG00000139173	-0.537831	3.66397	-2.88817	0.00553305	0.105976
ENSG00000182578	1.4558	2.61186	2.88664	0.00554489	0.106136
ENSG00000156966	0.867631	1.26234	2.88631	0.00555001	0.106167
ENSG00000107672	0.342994	4.5344	2.88578	0.00555801	0.106253
ENSG00000157168	-0.565846	6.47847	-2.88473	0.00557416	0.106254
ENSG00000251450	0.998407	0.0383457	2.88462	0.00557594	0.106254
ENSG00000154553	1.00083	0.772376	2.88458	0.00557648	0.106254
ENSG00000131055	1.28368	-3.07445	2.89455	0.00557849	0.106254
ENSG00000110375	-1.12217	-1.52841	-2.88463	0.00558052	0.106254
ENSG00000154856	0.988415	2.01507	2.88421	0.00558214	0.106254
ENSG00000198954	-0.307444	5.80506	-2.88419	0.00558254	0.106254
ENSG00000145147	-0.57091	6.67137	-2.88341	0.00559442	0.106393
ENSG00000163001	-0.426812	6.54756	-2.88312	0.00559898	0.106393
ENSG00000149489	1.24752	-0.162165	2.90976	0.00560038	0.106393
ENSG00000088832	0.392871	3.90776	2.88276	0.00560459	0.106407
ENSG00000146530	-1.14112	3.19733	-2.88334	0.0056154	0.106455
ENSG00000266276	-1.17212	-2.08778	-2.88316	0.00561613	0.106455
ENSG00000105409	-0.772625	5.93007	-2.88177	0.00561983	0.106455
ENSG00000134146	0.351707	4.2938	2.89279	0.00562117	0.106455
ENSG00000262202	-1.87493	-0.981742	-2.88138	0.00562578	0.106476
ENSG00000144791	0.956724	3.34619	2.89164	0.00563308	0.106548
ENSG00000128016	1.49089	2.10708	2.88019	0.00564429	0.106693
ENSG00000267206	1.37459	-3.82857	2.87939	0.00565675	0.106698
ENSG00000243364	1.20973	-1.37935	2.87907	0.00566168	0.106698
ENSG00000182492	1.47427	1.03025	2.87919	0.0056649	0.106698
ENSG00000264968	1.34369	-1.30926	2.89344	0.00566992	0.106698
ENSG00000197249	2.06139	0.0651283	2.8785	0.00567062	0.106698
ENSG00000091879	1.06916	0.948177	2.87824	0.0056747	0.106698
ENSG00000256331	1.45552	-3.21541	2.87817	0.00567681	0.106698
ENSG00000264559	1.28817	-2.49935	2.87802	0.00567974	0.106698
ENSG00000110092	0.880593	2.51407	2.87758	0.00568495	0.106698
ENSG00000226312	1.19352	-1.34711	2.87751	0.00568608	0.106698
ENSG00000204482	1.52265	0.133836	2.8774	0.00568773	0.106698
ENSG00000103855	-0.42363	5.90673	-2.87706	0.00569314	0.106698
ENSG00000084734	-0.814712	2.74325	-2.87701	0.00569388	0.106698
ENSG00000243410	1.29308	-1.87104	2.87684	0.00569654	0.106698
ENSG00000102385	-0.499541	6.59673	-2.8766	0.00570035	0.106698
ENSG00000149781	0.914856	2.06548	2.87657	0.0057008	0.106698
ENSG00000154447	0.35068	4.43058	2.87516	0.00572297	0.107032
ENSG00000174125	1.40913	1.1416	2.87499	0.00572567	0.107032
ENSG00000124942	1.40439	5.53232	2.87807	0.00573585	0.107135
ENSG00000137312	-0.307054	6.52779	-2.87419	0.00573823	0.107135
ENSG00000122778	-0.465283	6.36818	-2.87424	0.00577626	0.107779
ENSG00000110446	1.5299	0.0459453	2.87142	0.00578208	0.107821
ENSG00000233783	-1.31684	-2.54219	-2.87147	0.00579158	0.107932
ENSG00000233393	1.64037	-0.882503	2.8699	0.0058063	0.108108
ENSG00000138039	1.76962	-0.563089	2.87754	0.00581206	0.108108
ENSG00000141736	0.595523	2.65123	2.88032	0.00581674	0.108108
ENSG00000162576	0.938982	1.61947	2.86917	0.00581783	0.108108
ENSG00000220785	0.699183	2.57874	2.8704	0.00581886	0.108108
ENSG00000137558	-1.00426	2.64299	-2.86788	0.00584716	0.108529
ENSG00000197321	0.611549	5.89708	2.86762	0.00584866	0.108529
ENSG00000106571	0.928127	1.59727	2.86691	0.00585406	0.108563
ENSG00000147113	1.44394	0.678512	2.86663	0.0058586	0.108581
ENSG00000105851	2.01125	-0.497617	2.87523	0.00586382	0.108611
ENSG00000200632	-1.18068	1.93166	-2.86661	0.00586905	0.108615
ENSG00000254415	2.04592	-2.69188	2.86567	0.005874	0.108615
ENSG00000076662	1.18568	-0.335584	2.86562	0.00587483	0.108615
ENSG00000164068	-0.366278	6.34775	-2.8654	0.00587833	0.108615
ENSG00000109787	0.561161	4.67398	2.86516	0.00588233	0.108623
ENSG00000161664	-1.39077	-0.144742	-2.86609	0.00589037	0.108696
ENSG00000165197	-0.456538	3.05224	-2.86476	0.00589347	0.108696
ENSG00000165661	-0.259588	5.45416	-2.86388	0.00590298	0.108797
ENSG00000182177	-1.38451	-0.415245	-2.86358	0.00590774	0.108797
ENSG00000003249	-0.599422	3.48704	-2.86424	0.00590971	0.108797
ENSG00000235436	-0.57777	3.79821	-2.8629	0.00591887	0.1089
ENSG00000230176	1.21084	-1.86776	2.86252	0.00592508	0.108948
ENSG00000172936	0.945641	1.67772	2.86185	0.00593593	0.109048
ENSG00000058063	0.249184	6.35728	2.86174	0.00593768	0.109048
ENSG00000119812	-0.345586	5.2268	-2.86144	0.00594276	0.109075
ENSG00000057294	1.07161	0.978537	2.86982	0.0059543	0.109135
ENSG00000130433	1.36028	-1.98866	2.8607	0.00595473	0.109135
ENSG00000161513	-0.524378	3.49197	-2.86057	0.00595681	0.109135
ENSG00000197177	-0.437172	4.9703	-2.86009	0.00596535	0.109166
ENSG00000107341	0.300088	4.85536	2.86003	0.00596567	0.109166
ENSG00000124098	0.540054	4.49663	2.85992	0.00596978	0.109169
ENSG00000279462	-0.861207	1.9491	-2.86003	0.00597303	0.109169
ENSG00000161021	0.308068	6.16975	2.85869	0.00600577	0.109701
ENSG00000055070	0.373795	4.22179	2.8572	0.00601205	0.109727
ENSG00000099889	-0.486991	5.50094	-2.85705	0.00601444	0.109727
ENSG00000269958	0.708719	1.59494	2.8567	0.00602028	0.109732
ENSG00000279187	1.70659	-2.79284	2.8566	0.00602193	0.109732
ENSG00000005194	-0.361556	4.12447	-2.85667	0.00604397	0.109953
ENSG00000164889	0.602919	4.2008	2.85514	0.006046	0.109953
ENSG00000163531	-0.368687	9.53288	-2.8555	0.00604785	0.109953
ENSG00000174498	-0.490727	3.42177	-2.855	0.00604856	0.109953
ENSG00000136732	1.53431	-0.630405	2.85467	0.0060538	0.109983
ENSG00000267504	-1.08607	0.346434	-2.85518	0.00606102	0.110022
ENSG00000267648	1.34898	-3.39618	2.85667	0.00606506	0.110022
ENSG00000240401	1.1493	0.26627	2.86426	0.00606682	0.110022
ENSG00000165480	-1.22255	-1.36229	-2.85301	0.00608146	0.110036
ENSG00000124549	0.951652	0.950652	2.85301	0.00608323	0.110036
ENSG00000221598	-0.98225	0.373806	-2.85277	0.00608535	0.110036
ENSG00000177125	0.318522	4.83767	2.85778	0.00608874	0.110036
ENSG00000101003	-0.494976	2.18359	-2.85255	0.00608904	0.110036
ENSG00000116701	1.93216	-0.179442	2.85253	0.00608938	0.110036
ENSG00000166411	-0.364093	6.43009	-2.85236	0.00609668	0.110103
ENSG00000101255	-0.623737	2.41357	-2.85177	0.00610211	0.110122
ENSG00000198039	-0.501402	5.96583	-2.8516	0.00610498	0.110122
ENSG00000170385	0.565978	3.28587	2.85115	0.00611249	0.110192
ENSG00000251365	-0.703483	1.96891	-2.85239	0.00611801	0.110226
ENSG00000005189	-0.541932	2.75312	-2.85024	0.0061301	0.110378
ENSG00000143546	1.60878	-3.21819	2.84969	0.00613687	0.110435
ENSG00000228446	0.547544	2.54858	2.84894	0.00615284	0.110553
ENSG00000157193	-0.51058	7.19536	-2.8491	0.00615342	0.110553
ENSG00000185885	1.42031	-1.25136	2.85961	0.00615666	0.110553
ENSG00000164190	0.306982	7.61049	2.84927	0.006158	0.110553
ENSG00000135596	-0.613403	7.08529	-2.84754	0.00617299	0.110743
ENSG00000110665	1.61632	-0.942781	2.85822	0.00617798	0.110743
ENSG00000132475	0.579979	5.00521	2.84708	0.00618086	0.110743
ENSG00000155324	1.25581	2.32851	2.84694	0.00618322	0.110743
ENSG00000270409	1.3963	-2.79197	2.84663	0.0061886	0.110775
ENSG00000103852	0.598138	3.18788	2.84561	0.00620573	0.110866
ENSG00000100191	1.26947	1.25029	2.85708	0.00620752	0.110866
ENSG00000272754	0.749665	0.592693	2.84538	0.00620964	0.110866
ENSG00000163239	2.02574	-1.84854	2.84978	0.00621354	0.110866
ENSG00000161944	1.43343	-1.89253	2.84466	0.00622178	0.110866
ENSG00000248774	1.20888	-1.58277	2.84466	0.00622188	0.110866
ENSG00000067842	-0.505697	7.46459	-2.84464	0.00622215	0.110866
ENSG00000234423	-0.74584	2.43102	-2.8446	0.0062229	0.110866
ENSG00000258867	1.59699	-2.92697	2.84684	0.0062343	0.111003
ENSG00000254713	-0.723908	2.10752	-2.84259	0.00625708	0.111315
ENSG00000206052	-0.517087	6.41451	-2.84247	0.00625916	0.111315
ENSG00000223583	1.28459	-1.91606	2.84238	0.00626531	0.11136
ENSG00000196967	0.383047	5.17559	2.84128	0.00627961	0.111455
ENSG00000259493	-0.889502	0.475329	-2.84115	0.00628181	0.111455
ENSG00000266538	0.63958	2.20198	2.84199	0.00628241	0.111455
ENSG00000201325	1.66944	-1.05942	2.84133	0.00628535	0.111455
ENSG00000108175	0.393937	6.78521	2.84003	0.00630489	0.111736
ENSG00000101751	0.278409	5.13688	2.84025	0.00631275	0.111758
ENSG00000279356	-0.49769	3.15279	-2.83931	0.00631347	0.111758
ENSG00000132749	-0.920065	1.32285	-2.83891	0.00632212	0.111845
ENSG00000104381	-0.272523	6.80647	-2.83797	0.00634293	0.112148
ENSG00000137331	1.00548	1.6769	2.83623	0.00636672	0.112503
ENSG00000178028	-0.278245	6.43449	-2.83557	0.00637932	0.112632
ENSG00000188573	-0.676778	2.47007	-2.83646	0.00638144	0.112632
ENSG00000183840	-0.926955	0.980961	-2.83477	0.00639203	0.112714
ENSG00000215305	-0.335607	5.14676	-2.83469	0.00639352	0.112714
ENSG00000228253	1.10821	5.56051	2.83448	0.00639721	0.112714
ENSG00000204525	0.895237	4.48731	2.83413	0.00640315	0.112731
ENSG00000204590	-0.389199	7.10689	-2.83388	0.00640753	0.112731
ENSG00000205937	-0.31124	7.4046	-2.83627	0.0064093	0.112731
ENSG00000179818	0.271465	6.96819	2.83331	0.00642051	0.11277
ENSG00000188921	0.911693	1.04323	2.83304	0.00642231	0.11277
ENSG00000169504	0.936462	3.12591	2.83302	0.00642267	0.11277
ENSG00000264941	-1.23337	-2.68983	-2.83146	0.00645115	0.113184
ENSG00000164794	-0.824103	1.25874	-2.83125	0.00645371	0.113184
ENSG00000168275	-0.519428	2.56822	-2.83159	0.00645895	0.113202
ENSG00000151923	0.247664	6.18601	2.83077	0.00646217	0.113202
ENSG00000101210	-0.544316	7.56755	-2.83286	0.00646621	0.113207
ENSG00000187735	0.313261	4.91623	2.83023	0.00647163	0.113237
ENSG00000145832	1.41246	0.780803	2.82921	0.00648959	0.113425
ENSG00000146700	-1.03451	-0.764215	-2.83071	0.00648988	0.113425
ENSG00000157064	-0.521282	6.35834	-2.82874	0.00650195	0.113571
ENSG00000215483	0.806119	2.47222	2.82875	0.00651085	0.113661
ENSG00000268001	1.50652	-2.75625	2.82705	0.00652795	0.113883
ENSG00000003402	0.502805	7.09092	2.82687	0.00653109	0.113883
ENSG00000266714	0.977242	4.68208	2.82552	0.00655509	0.114236
ENSG00000115414	1.28071	4.02514	2.83297	0.006568	0.114396
ENSG00000110934	1.61523	0.294922	2.82446	0.00657416	0.114437
ENSG00000268496	1.46356	-1.3082	2.8233	0.00659495	0.114704
ENSG00000105246	1.62116	-1.68357	2.82318	0.00659704	0.114704
ENSG00000047849	0.452679	7.15179	2.82248	0.0066097	0.114827
ENSG00000258227	1.89198	-2.047	2.82212	0.00661611	0.114827
ENSG00000214185	1.16908	-2.04507	2.82211	0.00661626	0.114827
ENSG00000139974	-0.332617	6.00845	-2.82195	0.00661924	0.114827
ENSG00000131153	1.00303	-0.481042	2.82136	0.00662984	0.114882
ENSG00000213640	-0.734433	3.80818	-2.82135	0.00662997	0.114882
ENSG00000264814	1.29645	-2.49623	2.82096	0.0066369	0.114935
ENSG00000105193	0.347653	4.05171	2.82058	0.00664378	0.114935
ENSG00000167702	-0.679347	6.71703	-2.82005	0.00665345	0.114935
ENSG00000224595	1.24229	-2.74477	2.8199	0.00665616	0.114935
ENSG00000110013	-0.457165	4.32595	-2.82106	0.00665828	0.114935
ENSG00000147465	-0.878145	2.92503	-2.82019	0.00665988	0.114935
ENSG00000005339	0.228101	7.82753	2.82038	0.0066612	0.114935
ENSG00000101224	-0.374758	6.47393	-2.8195	0.00666334	0.114935
ENSG00000125970	0.286993	5.36232	2.81901	0.00667226	0.115007
ENSG00000198945	-0.553811	4.68672	-2.81885	0.00667509	0.115007
ENSG00000234835	-0.710751	1.66892	-2.81836	0.00668399	0.115079
ENSG00000198915	-0.565028	4.75423	-2.81803	0.00669004	0.115079
ENSG00000204305	0.592332	1.87193	2.81799	0.00669071	0.115079
ENSG00000198300	-0.436456	9.41176	-2.81755	0.00669879	0.115079
ENSG00000273387	1.41524	-1.89087	2.81738	0.00670196	0.115079
ENSG00000165025	1.45357	1.2117	2.81737	0.00670204	0.115079
ENSG00000091986	1.07581	0.595262	2.81712	0.00670667	0.115094
ENSG00000169105	0.929298	-0.529271	2.81689	0.00671071	0.115098
ENSG00000047230	0.364767	4.07316	2.81674	0.00671476	0.115103
ENSG00000129990	-0.710102	5.68037	-2.81623	0.00672289	0.115138
ENSG00000171206	0.302038	6.00643	2.82057	0.00672441	0.115138
ENSG00000232807	1.5537	-1.36223	2.82419	0.0067286	0.115145
ENSG00000157782	-0.667792	5.35311	-2.81554	0.00673547	0.115197
ENSG00000231134	1.51017	-2.23626	2.81522	0.00674278	0.115223
ENSG00000267636	-1.18308	-1.0711	-2.81504	0.00674454	0.115223
ENSG00000248476	0.720427	1.79317	2.81594	0.00675335	0.115308
ENSG00000267515	0.794347	-0.548455	2.82716	0.00675855	0.115316
ENSG00000125746	-0.369548	6.88734	-2.81412	0.00676142	0.115316
ENSG00000197629	2.05409	0.108853	2.81386	0.00676616	0.115317
ENSG00000130612	-0.677027	3.12659	-2.81438	0.00676908	0.115317
ENSG00000110925	-0.364835	7.23156	-2.81297	0.00678266	0.115436
ENSG00000168872	-0.30668	5.63816	-2.81263	0.00678881	0.115436
ENSG00000149633	1.07633	3.27767	2.81236	0.00679387	0.115436
ENSG00000226318	0.475109	3.04149	2.81223	0.00679631	0.115436
ENSG00000161714	0.485399	3.03202	2.81241	0.00679797	0.115436
ENSG00000216809	-0.64534	3.29462	-2.81209	0.00679887	0.115436
ENSG00000165646	-2.13006	4.09267	-2.811	0.00682688	0.115847
ENSG00000070756	0.366537	5.93936	2.81003	0.00683685	0.115926
ENSG00000274628	-0.892318	1.75572	-2.81047	0.00684226	0.115926
ENSG00000281920	-1.11484	0.310432	-2.8097	0.00684298	0.115926
ENSG00000016391	0.747271	2.01065	2.80945	0.00684768	0.115926
ENSG00000254087	1.32303	1.3396	2.80929	0.00685062	0.115926
ENSG00000104881	1.11864	1.01177	2.80885	0.0068589	0.116001
ENSG00000249715	-0.476611	4.21142	-2.80796	0.00687538	0.116215
ENSG00000273830	-0.930133	0.338926	-2.80699	0.00689346	0.116379
ENSG00000177045	0.928938	-0.0105497	2.80696	0.00689408	0.116379
ENSG00000237862	-1.24411	0.997193	-2.80709	0.00689694	0.116379
ENSG00000224397	1.75896	-2.22503	2.80662	0.00690041	0.116379
ENSG00000119280	0.841239	3.87921	2.82976	0.00690563	0.116403
ENSG00000279400	1.60133	1.09375	2.80591	0.00691381	0.116476
ENSG00000231437	-0.881949	2.40187	-2.80574	0.00692284	0.116563
ENSG00000176383	-0.812921	2.02988	-2.80453	0.00693958	0.116733
ENSG00000228201	1.01709	-1.10514	2.80448	0.00694059	0.116733
ENSG00000255823	1.37948	-0.146278	2.80403	0.00694911	0.116774
ENSG00000206652	0.89541	0.642197	2.80394	0.00695071	0.116774
ENSG00000106976	-0.515869	9.35509	-2.80361	0.00695689	0.116796
ENSG00000079385	1.13768	0.162459	2.80346	0.00695977	0.116796
ENSG00000176994	0.242096	5.27537	2.80438	0.00696491	0.116818
ENSG00000253352	0.305738	6.81957	2.80277	0.00697276	0.116885
ENSG00000110148	-1.40452	0.284023	-2.80321	0.006983	0.116943
ENSG00000277556	-1.29552	-1.03577	-2.80203	0.00698687	0.116943
ENSG00000227704	1.0493	-1.24409	2.80198	0.00698776	0.116943
ENSG00000231607	1.0726	2.0149	2.80116	0.00700331	0.117139
ENSG00000139644	0.45362	6.02924	2.80069	0.00701218	0.117222
ENSG00000158373	1.15214	1.75188	2.8001	0.00702349	0.117292
ENSG00000279142	1.65477	-2.66201	2.80006	0.00702408	0.117292
ENSG00000102678	-0.668854	4.58562	-2.79966	0.00703167	0.117354
ENSG00000267416	-1.17326	-0.752875	-2.80034	0.00703869	0.117391
ENSG00000260456	-0.433917	2.51771	-2.79905	0.00704493	0.117391
ENSG00000234745	1.05619	4.19531	2.79894	0.00704547	0.117391
ENSG00000117713	0.275606	7.37722	2.79846	0.00705463	0.117479
ENSG00000267801	1.55409	-2.1644	2.79817	0.00706022	0.117508
ENSG00000226926	1.05095	-0.419346	2.80183	0.00706597	0.117539
ENSG00000167889	-0.554401	5.59121	-2.79711	0.00708044	0.117715
ENSG00000142655	-0.257623	4.64755	-2.79662	0.00708979	0.117806
ENSG00000174059	1.46438	0.674332	2.79597	0.00710234	0.117888
ENSG00000269883	-0.584181	2.63714	-2.79596	0.00710246	0.117888
ENSG00000243155	0.721729	1.04366	2.79543	0.00711782	0.118078
ENSG00000162849	-0.570721	5.94138	-2.795	0.00712822	0.118186
ENSG00000286063	-1.67944	-1.12963	-2.79541	0.00713417	0.11822
ENSG00000102316	-0.418825	6.06676	-2.7943	0.00715406	0.118419
ENSG00000164967	-0.525918	1.85151	-2.79313	0.00715703	0.118419
ENSG00000172318	-0.827351	3.52758	-2.79418	0.00715785	0.118419
ENSG00000109265	-0.608848	5.72142	-2.79274	0.0071658	0.118468
ENSG00000282556	1.41874	-1.86512	2.79253	0.00716864	0.118468
ENSG00000167895	1.08084	1.01738	2.79189	0.00718108	0.118609
ENSG00000120279	1.58708	-1.9908	2.79014	0.00721514	0.119107
ENSG00000142082	-0.331625	5.05526	-2.78976	0.00722253	0.119164
ENSG00000233672	1.19181	-0.0294084	2.78945	0.00723347	0.119254
ENSG00000275052	0.290477	6.15999	2.78925	0.00724532	0.119254
ENSG00000210077	1.31226	1.98788	2.78841	0.00724888	0.119254
ENSG00000129534	0.651304	3.82003	2.79164	0.00725103	0.119254
ENSG00000228376	-0.942564	1.85705	-2.788	0.00725696	0.119254
ENSG00000179796	-0.539131	5.54865	-2.78781	0.00726071	0.119254
ENSG00000284690	1.62578	-2.96399	2.78771	0.00726264	0.119254
ENSG00000248118	-1.45675	-0.625184	-2.78768	0.00726315	0.119254
ENSG00000286110	-0.497751	4.6432	-2.78767	0.00726334	0.119254
ENSG00000252473	0.769326	0.116892	2.78662	0.00728395	0.119528
ENSG00000117228	1.43281	0.0784076	2.78583	0.00729964	0.11972
ENSG00000085063	0.455488	5.35686	2.78816	0.00731773	0.119952
ENSG00000120949	1.78531	-2.43097	2.78404	0.00733482	0.120168
ENSG00000243916	-0.922669	1.57278	-2.7838	0.0073397	0.120183
ENSG00000183780	-0.725595	4.42301	-2.7845	0.00734847	0.120261
ENSG00000169760	-0.348838	6.9149	-2.78259	0.00736372	0.120446
ENSG00000090316	-0.275507	6.3463	-2.78473	0.00738253	0.120689
ENSG00000145244	-0.892636	2.81327	-2.78102	0.0074062	0.12101
ENSG00000223768	-0.357299	6.59927	-2.77992	0.00741684	0.121035
ENSG00000143226	1.66056	0.152607	2.77983	0.00741874	0.121035
ENSG00000264456	1.09945	-0.03562	2.77957	0.00742385	0.121035
ENSG00000224389	0.934522	0.558198	2.77951	0.00742498	0.121035
ENSG00000068079	1.1384	-0.291418	2.77921	0.00743098	0.121035
ENSG00000067057	-0.505825	6.69746	-2.77906	0.00743417	0.121035
ENSG00000145390	0.690358	6.23557	2.77898	0.00743562	0.121035
ENSG00000073670	-0.612638	6.17599	-2.77795	0.00745637	0.121196
ENSG00000157856	-0.71037	3.28252	-2.77792	0.00745697	0.121196
ENSG00000255545	-0.802362	4.07089	-2.77789	0.00745749	0.121196
ENSG00000185130	1.17053	-2.13227	2.7772	0.00747148	0.121359
ENSG00000172349	0.719173	3.36767	2.77685	0.00747854	0.121368
ENSG00000120868	0.416062	4.93737	2.77729	0.00748265	0.121368
ENSG00000131828	-0.277943	6.72654	-2.77657	0.00748403	0.121368
ENSG00000248103	-0.619852	1.37916	-2.77714	0.00748844	0.121374
ENSG00000232006	-0.996392	1.44036	-2.77692	0.00750688	0.121505
ENSG00000111218	-0.903691	4.35726	-2.77543	0.00750709	0.121505
ENSG00000189058	1.35349	4.00801	2.77786	0.00750854	0.121505
ENSG00000134508	0.646992	3.77803	2.77506	0.00751467	0.121523
ENSG00000026036	-0.583881	3.45588	-2.77488	0.00751831	0.121523
ENSG00000180596	1.13635	2.13072	2.78949	0.00752441	0.121523
ENSG00000205702	-0.558713	4.31319	-2.77476	0.00752563	0.121523
ENSG00000241769	-0.499868	4.22426	-2.77352	0.00754576	0.121783
ENSG00000229887	-1.28462	3.0925	-2.77238	0.00756894	0.122092
ENSG00000204161	1.43478	0.831735	2.77205	0.00757569	0.122136
ENSG00000202174	-1.13358	1.44413	-2.77141	0.00758875	0.122282
ENSG00000272808	1.20752	0.870404	2.77046	0.0076081	0.122516
ENSG00000150760	1.00306	4.18003	2.77009	0.00761585	0.122516
ENSG00000151474	-0.314159	8.08841	-2.76981	0.00762148	0.122516
ENSG00000273024	-0.583855	3.56087	-2.76941	0.00762974	0.122516
ENSG00000100379	-0.555808	3.51901	-2.76939	0.00763003	0.122516
ENSG00000188451	1.10872	-2.16442	2.76938	0.00763042	0.122516
ENSG00000187824	1.23503	-0.50192	2.76919	0.00763427	0.122516
ENSG00000102743	-0.493479	2.75786	-2.76912	0.00763558	0.122516
ENSG00000167543	0.583083	2.11936	2.76837	0.00765101	0.122672
ENSG00000139083	0.550086	4.01764	2.76806	0.00765737	0.122672
ENSG00000243978	-0.876678	1.20463	-2.76964	0.00765742	0.122672
ENSG00000177990	-0.763524	5.50813	-2.76706	0.00768148	0.122993
ENSG00000241158	1.43842	-2.37673	2.76648	0.00769133	0.123057
ENSG00000212766	-1.09642	1.11512	-2.76631	0.00769357	0.123057
ENSG00000266017	-0.826629	3.92188	-2.76608	0.00769825	0.123067
ENSG00000274561	0.450953	2.29364	2.76647	0.00771209	0.123105
ENSG00000145191	-0.310478	6.73597	-2.7651	0.00771857	0.123105
ENSG00000108219	0.685001	4.55166	2.76567	0.00772264	0.123105
ENSG00000170653	0.556283	4.37263	2.76489	0.00772289	0.123105
ENSG00000129009	1.63933	-1.0067	2.76627	0.00772437	0.123105
ENSG00000170234	0.419833	5.664	2.76518	0.00772495	0.123105
ENSG00000274618	1.19569	-1.55983	2.76471	0.00772974	0.123116
ENSG00000199914	-0.904714	0.79071	-2.76537	0.00774731	0.123281
ENSG00000066336	1.51402	1.31255	2.77059	0.00775398	0.123281
ENSG00000173638	0.454416	4.46815	2.76333	0.0077554	0.123281
ENSG00000132514	1.5441	-2.6187	2.76329	0.00775632	0.123281
ENSG00000067191	-0.390211	5.79746	-2.76298	0.0077626	0.123316
ENSG00000201846	-1.37388	-0.857229	-2.76269	0.00777026	0.123365
ENSG00000120156	0.675861	2.76631	2.76233	0.00777619	0.123365
ENSG00000172795	0.310619	5.38678	2.76225	0.0077779	0.123365
ENSG00000145882	-0.426382	5.66154	-2.76149	0.00779388	0.123554
ENSG00000166153	0.969106	0.0273037	2.76098	0.00780453	0.123659
ENSG00000100368	1.56423	-0.882874	2.76824	0.0078306	0.124007
ENSG00000073803	-0.248186	6.11268	-2.75827	0.00786142	0.124244
ENSG00000185933	-1.0465	1.01462	-2.75952	0.00786446	0.124244
ENSG00000171658	1.63476	-2.6742	2.75804	0.00786643	0.124244
ENSG00000188290	-0.514251	4.35509	-2.75794	0.00786846	0.124244
ENSG00000114631	-0.40941	7.15958	-2.75778	0.00787174	0.124244
ENSG00000114013	1.50872	0.033268	2.75775	0.00787236	0.124244
ENSG00000126970	-0.251703	3.69695	-2.75766	0.00787424	0.124244
ENSG00000108187	0.402699	3.07604	2.76022	0.00789074	0.124379
ENSG00000283183	-0.488803	5.5656	-2.75687	0.00789097	0.124379
ENSG00000134709	-0.47989	5.80555	-2.75919	0.00790365	0.124409
ENSG00000254226	-0.626919	2.71843	-2.75692	0.00790395	0.124409
ENSG00000173875	0.258694	5.66158	2.75618	0.00790558	0.124409
ENSG00000224613	-1.04455	-0.200041	-2.75635	0.0079145	0.124409
ENSG00000109625	1.55563	-2.57602	2.75576	0.00791455	0.124409
ENSG00000138380	0.329842	4.90769	2.75562	0.00791744	0.124409
ENSG00000161929	1.57165	-0.913132	2.75536	0.00792314	0.124434
ENSG00000133739	0.405529	4.43366	2.7559	0.00792736	0.124436
ENSG00000168172	0.265206	7.8735	2.76242	0.0079355	0.124481
ENSG00000133460	-0.55496	7.30451	-2.75433	0.00794488	0.124481
ENSG00000105948	-0.3466	4.65376	-2.75414	0.0079491	0.124481
ENSG00000112837	1.76598	1.0039	2.7663	0.0079506	0.124481
ENSG00000138621	0.380692	3.47588	2.75406	0.00795071	0.124481
ENSG00000184611	-0.733628	4.71908	-2.75423	0.00795944	0.124501
ENSG00000184371	0.91724	3.46275	2.7617	0.00796023	0.124501
ENSG00000159588	0.600064	1.73419	2.7554	0.00796733	0.124527
ENSG00000059377	1.11594	2.2517	2.75308	0.00797161	0.124527
ENSG00000172465	-0.459667	4.16105	-2.75287	0.00797623	0.124527
ENSG00000162694	-0.418396	4.68656	-2.75323	0.00798099	0.124527
ENSG00000068028	0.498745	3.49734	2.7524	0.00798616	0.124527
ENSG00000249188	-1.35696	-0.215256	-2.75238	0.00798653	0.124527
ENSG00000057252	0.406566	4.78246	2.75621	0.00799168	0.124544
ENSG00000272758	0.667784	1.31408	2.75177	0.00800197	0.12464
ENSG00000276248	-0.381317	3.86535	-2.75197	0.00800649	0.124647
ENSG00000223394	-1.41884	-1.08522	-2.75055	0.00802586	0.124884
ENSG00000090382	1.62817	0.0472758	2.74986	0.00804064	0.124945
ENSG00000268379	-0.615896	2.32846	-2.75342	0.00804203	0.124945
ENSG00000196876	-0.390614	8.91224	-2.74969	0.00804442	0.124945
ENSG00000008394	1.45023	-0.237929	2.74945	0.00804953	0.124945
ENSG00000042493	1.47135	-0.687385	2.74912	0.00805672	0.124945
ENSG00000100320	-0.282958	8.06215	-2.74906	0.00805784	0.124945
ENSG00000145247	-0.566395	3.87846	-2.74903	0.00805855	0.124945
ENSG00000027869	1.31104	-0.895505	2.7484	0.00807219	0.125092
ENSG00000232599	-0.991374	3.27715	-2.74796	0.00809145	0.125327
ENSG00000103042	-0.389329	5.58283	-2.74804	0.00810378	0.125454
ENSG00000135373	1.22574	-0.729447	2.74629	0.00811783	0.12555
ENSG00000066027	0.590294	3.70452	2.74595	0.00812619	0.12555
ENSG00000130762	-0.808842	3.71859	-2.74571	0.00813043	0.12555
ENSG00000177694	0.45129	2.69721	2.74567	0.0081315	0.12555
ENSG00000156096	1.67305	-3.19036	2.74984	0.00813366	0.12555
ENSG00000197147	0.476289	4.99086	2.74525	0.00814064	0.12555
ENSG00000269927	-1.25156	-2.4269	-2.74516	0.00814252	0.12555
ENSG00000185008	-0.513367	7.56748	-2.74482	0.00814986	0.12555
ENSG00000250131	1.02228	-0.117538	2.74467	0.00815315	0.12555
ENSG00000100599	1.30281	2.2222	2.74427	0.0081618	0.12555
ENSG00000226328	-0.329106	3.72601	-2.74414	0.00816585	0.12555
ENSG00000115361	1.19825	0.956878	2.74406	0.00816643	0.12555
ENSG00000153029	0.878295	2.01333	2.74396	0.0081686	0.12555
ENSG00000104522	-0.432246	3.24834	-2.74385	0.00817137	0.12555
ENSG00000274376	-0.819194	3.75137	-2.74381	0.00817206	0.12555
ENSG00000185627	-0.355284	5.6213	-2.74387	0.00818228	0.125644
ENSG00000158615	0.339399	5.4962	2.74298	0.00819011	0.1257
ENSG00000141668	-1.32368	3.39762	-2.7426	0.00820393	0.125849
ENSG00000105697	1.53149	-1.89296	2.74235	0.00821687	0.125984
ENSG00000173227	-0.599624	5.16558	-2.74149	0.00822281	0.12601
ENSG00000104728	0.670586	3.40178	2.74119	0.00822932	0.12601
ENSG00000133135	-1.00416	2.18053	-2.74208	0.00823416	0.12601
ENSG00000213131	-0.68146	2.16989	-2.74074	0.00823937	0.12601
ENSG00000187475	1.40715	-2.99486	2.74068	0.00824068	0.12601
ENSG00000274922	1.27911	-0.924335	2.74052	0.00824425	0.12601
ENSG00000279357	1.19318	-3.20013	2.74382	0.00825539	0.12601
ENSG00000101972	0.30872	6.10157	2.73999	0.00825578	0.12601
ENSG00000005483	0.281915	7.85743	2.74121	0.00825596	0.12601
ENSG00000109832	-0.405438	5.34153	-2.7395	0.00826663	0.12611
ENSG00000100395	-0.34209	5.77369	-2.73914	0.00827469	0.126153
ENSG00000100592	-0.300885	7.46007	-2.739	0.00827778	0.126153
ENSG00000273257	1.26149	-1.98913	2.73899	0.00830038	0.126217
ENSG00000243649	0.969538	-0.615545	2.73784	0.00830337	0.126217
ENSG00000122870	0.736674	3.29528	2.73776	0.00830552	0.126217
ENSG00000117594	1.23478	-0.11902	2.73773	0.00830575	0.126217
ENSG00000206077	-0.797749	7.24158	-2.73764	0.00830776	0.126217
ENSG00000127314	0.412687	5.12939	2.7376	0.00830872	0.126217
[truncated: 28,360 more rows]

## Sheet: B
Dopa neurons BD vs Control
	logFC	AveExpr	t	P.Value	adj.P.Val
ENSG00000258695	-2.44547	-0.992986	-5.43764	1.26179e-06	0.0383054
ENSG00000202601	1.96711	-1.5017	5.13858	3.86486e-06	0.0586647
ENSG00000262202	2.14773	-0.981742	4.86988	9.73497e-06	0.073983
ENSG00000223440	-3.50708	-0.794216	-4.81809	1.19858e-05	0.073983
ENSG00000197594	1.35401	3.27164	4.79743	1.28501e-05	0.073983
ENSG00000132297	1.46856	0.316456	4.7391	1.58033e-05	0.073983
ENSG00000139874	1.23278	3.17733	4.71743	1.70591e-05	0.073983
ENSG00000278771	1.6306	8.07561	4.65583	2.11239e-05	0.0801601
ENSG00000230679	1.70772	-1.85192	4.58582	2.63228e-05	0.0827871
ENSG00000206737	1.20441	1.61067	4.52854	3.28231e-05	0.0827871
ENSG00000165655	1.51853	1.64901	4.52471	3.31684e-05	0.0827871
ENSG00000151881	0.580154	3.11936	4.51489	3.43845e-05	0.0827871
ENSG00000150995	0.826067	7.69134	4.5	3.54514e-05	0.0827871
ENSG00000232944	1.86522	-1.50584	4.42179	4.73658e-05	0.0986153
ENSG00000134138	-2.02194	5.48736	-4.40583	4.98851e-05	0.0986153
ENSG00000138449	1.29334	1.92563	4.36451	5.68221e-05	0.0986153
ENSG00000179097	1.30188	0.897221	4.35316	5.9634e-05	0.0986153
ENSG00000231023	1.99133	-2.18129	4.35363	5.96558e-05	0.0986153
ENSG00000166292	1.84659	-0.811262	4.34314	6.17198e-05	0.0986153
ENSG00000271427	1.44975	-1.05179	4.29976	7.00458e-05	0.106323
ENSG00000236209	-3.53064	-1.33817	-4.27856	7.57432e-05	0.109496
ENSG00000189295	1.7825	-2.5686	4.25967	8.13884e-05	0.112309
ENSG00000280161	1.38708	-0.276015	4.22929	8.87946e-05	0.112784
ENSG00000281398	0.880085	3.1256	4.21021	9.6279e-05	0.112784
ENSG00000183281	1.21	1.50713	4.19377	0.000100004	0.112784
ENSG00000140526	0.658466	6.9487	4.18175	0.000105406	0.112784
ENSG00000243978	0.962561	1.20463	4.17836	0.000107274	0.112784
ENSG00000285106	0.747198	4.84532	4.17128	0.000109745	0.112784
ENSG00000265185	1.10116	3.08699	4.16974	0.000109944	0.112784
ENSG00000273062	1.31468	-0.810209	4.1666	0.000111454	0.112784
ENSG00000182747	1.84646	-0.765956	4.14103	0.000119223	0.11323
ENSG00000240891	0.850498	3.68564	4.146	0.000119354	0.11323
ENSG00000226329	2.0784	-1.3454	4.1342	0.000123955	0.114031
ENSG00000272635	1.72825	-2.38431	4.1205	0.000129938	0.115461
ENSG00000227431	1.1012	0.0988288	4.11067	0.000134148	0.115461
ENSG00000168273	0.721117	2.3604	4.10415	0.000136919	0.115461
ENSG00000260695	1.55817	-1.80987	4.08658	0.000142795	0.116898
ENSG00000231856	0.859259	0.89691	4.07013	0.000150762	0.116898
ENSG00000255008	1.40649	-1.3599	4.07295	0.000151734	0.116898
ENSG00000279212	1.68762	-1.5618	4.05945	0.000156164	0.116898
ENSG00000224977	1.72864	-1.67509	4.05906	0.00015905	0.116898
ENSG00000235527	0.792379	1.90045	4.04118	0.000165843	0.116898
ENSG00000199005	0.76442	2.41658	4.03769	0.000170487	0.116898
ENSG00000183114	0.801826	3.36782	4.0344	0.000172221	0.116898
ENSG00000214264	0.571423	3.6809	4.03149	0.000173279	0.116898
ENSG00000261083	1.57895	-1.24561	4.00322	0.000191014	0.125024
ENSG00000139354	1.67519	0.232684	3.98013	0.000205352	0.125024
ENSG00000104221	0.573118	3.26225	3.97402	0.000209896	0.125024
ENSG00000264910	1.79311	-1.4016	3.96903	0.000213225	0.125024
ENSG00000134363	1.33113	0.126877	3.95618	0.00021902	0.125024
ENSG00000279249	1.30149	3.97587	3.95623	0.000221286	0.125024
ENSG00000260285	0.715705	3.43848	3.94789	0.000225008	0.125024
ENSG00000132031	1.8127	1.33755	3.95065	0.000225438	0.125024
ENSG00000148488	1.49203	4.01558	3.94273	0.000231105	0.125024
ENSG00000275457	1.06548	1.00326	3.93791	0.000232427	0.125024
ENSG00000207082	0.779452	1.48576	3.92699	0.000244446	0.125024
ENSG00000260625	0.833342	1.48707	3.92495	0.000245675	0.125024
ENSG00000115884	1.63784	1.79898	3.92427	0.000246454	0.125024
ENSG00000234474	1.88934	-2.92174	3.91287	0.000252094	0.125024
ENSG00000233551	1.71608	-2.66215	3.91456	0.000253886	0.125024
ENSG00000100504	1.39619	3.65979	3.91085	0.000253891	0.125024
ENSG00000236514	1.12348	0.169916	3.91339	0.000255336	0.125024
ENSG00000136999	1.43696	0.824785	3.9065	0.000260753	0.12565
ENSG00000196872	0.938271	2.6592	3.8985	0.000267072	0.126684
ENSG00000262500	1.83144	-2.69737	3.876	0.000285573	0.133376
ENSG00000280189	1.23713	2.09509	3.85575	0.000304356	0.139995
ENSG00000274818	1.48155	-2.12003	3.83465	0.00032638	0.144137
ENSG00000226149	1.24179	1.57297	3.83441	0.000327229	0.144137
ENSG00000255504	1.80369	-3.09469	3.83471	0.000327606	0.144137
ENSG00000286082	-3.05823	-0.147245	-3.80293	0.000363936	0.157834
ENSG00000172519	-1.95931	-2.18098	-3.77743	0.000392275	0.164369
ENSG00000156466	1.62439	-1.27758	3.7751	0.00039242	0.164369
ENSG00000222041	1.03023	3.50471	3.77222	0.000399909	0.164369
ENSG00000260475	1.19678	0.105699	3.76702	0.000402641	0.164369
ENSG00000261934	-0.567103	3.7764	-3.76861	0.000406076	0.164369
ENSG00000273382	0.643567	1.73229	3.73636	0.000443811	0.175575
ENSG00000261786	0.697496	7.16598	3.7381	0.000445596	0.175575
ENSG00000286177	0.843705	1.17989	3.73121	0.000451111	0.175575
ENSG00000167094	1.28381	-0.4402	3.72133	0.000465441	0.178859
ENSG00000252549	0.891796	0.425311	3.71849	0.000475689	0.180512
ENSG00000218689	1.3182	0.732235	3.7028	0.000493486	0.184954
ENSG00000227540	0.647606	1.29015	3.70116	0.000501556	0.185011
ENSG00000164951	0.6645	4.74385	3.6952	0.000509127	0.185011
ENSG00000265100	0.886204	1.57182	3.69454	0.000511923	0.185011
ENSG00000253819	1.61459	-2.91724	3.68627	0.000525304	0.187614
ENSG00000241002	1.03784	1.68295	3.67782	0.000539201	0.188605
ENSG00000082175	1.75408	0.897033	3.67713	0.000540505	0.188605
ENSG00000124557	-2.5094	-1.31069	-3.66824	0.000556196	0.191875
ENSG00000213896	1.70948	-0.977574	3.65898	0.000572347	0.192545
ENSG00000165449	0.744904	3.07557	3.65326	0.000576657	0.192545
ENSG00000125355	1.07471	4.20406	3.65646	0.000577166	0.192545
ENSG00000233351	1.46049	0.181414	3.62976	0.00062688	0.198529
ENSG00000222343	1.17104	-0.0763031	3.63018	0.000627328	0.198529
ENSG00000171189	-1.42991	8.45798	-3.62157	0.000643406	0.198529
ENSG00000168743	1.5172	3.72517	3.62005	0.000644925	0.198529
ENSG00000233828	-1.76298	-1.31174	-3.61233	0.0006583	0.198529
ENSG00000260941	0.957694	1.46675	3.61253	0.000661655	0.198529
ENSG00000215492	-1.00159	2.2278	-3.61206	0.000663085	0.198529
ENSG00000271379	1.23299	-0.912574	3.60679	0.000666721	0.198529
ENSG00000265728	1.12872	0.525799	3.60643	0.000675032	0.198529
ENSG00000237298	0.449516	6.59203	3.6009	0.000685018	0.198529
ENSG00000147655	1.5646	2.33088	3.60025	0.000685842	0.198529
ENSG00000152377	-0.687038	6.23361	-3.59477	0.000696443	0.198529
ENSG00000274934	1.00205	-0.1647	3.58846	0.000705827	0.198529
ENSG00000102924	1.3157	2.49081	3.58964	0.000708272	0.198529
ENSG00000226380	0.73243	6.35048	3.58913	0.000711406	0.198529
ENSG00000184156	0.633716	6.67642	3.58662	0.000716793	0.198529
ENSG00000260339	0.718906	2.82023	3.58292	0.000718065	0.198529
ENSG00000280268	-2.04511	-3.24158	-3.57753	0.000730176	0.198529
ENSG00000172965	1.03364	4.38497	3.57681	0.000736414	0.198529
ENSG00000234257	1.68813	-2.17082	3.57301	0.00074047	0.198529
ENSG00000152904	0.597676	2.67274	3.57255	0.000747396	0.198529
ENSG00000168301	0.596961	4.13112	3.57305	0.000747776	0.198529
ENSG00000255231	1.02487	0.144749	3.56672	0.00076383	0.198529
ENSG00000168418	1.55349	0.861531	3.56208	0.000765963	0.198529
ENSG00000200972	1.62605	-2.99764	3.56027	0.000770254	0.198529
ENSG00000147408	1.09642	3.90397	3.55706	0.000783016	0.198529
ENSG00000110693	1.58039	3.97687	3.55122	0.000794401	0.198529
ENSG00000258655	0.785285	1.89227	3.54969	0.000795872	0.198529
ENSG00000165072	1.22236	2.40684	3.55177	0.000798065	0.198529
ENSG00000197852	0.991006	1.89116	3.54986	0.000799982	0.198529
ENSG00000201518	1.3143	-0.557496	3.54664	0.000803398	0.198529
ENSG00000279077	-0.685444	3.02859	-3.54631	0.000812457	0.198529
ENSG00000153898	1.46672	-0.456658	3.54318	0.000820973	0.198529
ENSG00000188997	0.590148	3.24632	3.53537	0.000840465	0.198529
ENSG00000240859	0.734252	1.29279	3.52774	0.000851579	0.198529
ENSG00000160305	-0.353035	7.76704	-3.52682	0.00085909	0.198529
ENSG00000186806	0.725099	1.8993	3.5267	0.000862315	0.198529
ENSG00000113448	0.497361	7.04747	3.52418	0.00086441	0.198529
ENSG00000171385	1.04183	5.98711	3.51781	0.000884194	0.198529
ENSG00000231507	-1.86005	-2.39746	-3.51576	0.000888069	0.198529
ENSG00000105852	1.42079	0.323126	3.51572	0.000889768	0.198529
ENSG00000127152	1.08269	3.10865	3.51359	0.000892013	0.198529
ENSG00000253669	1.05143	-0.200439	3.50732	0.000914695	0.198529
ENSG00000200385	1.36883	-2.81927	3.50713	0.000916958	0.198529
ENSG00000267702	0.466232	5.59317	3.50256	0.00092009	0.198529
ENSG00000171540	-2.47635	-2.45696	-3.50116	0.00092405	0.198529
ENSG00000186470	-1.49003	3.22755	-3.50327	0.000926476	0.198529
ENSG00000227582	1.50668	1.09286	3.50049	0.00093356	0.198529
ENSG00000139946	-0.7991	4.27984	-3.50074	0.000934994	0.198529
ENSG00000106733	0.526898	4.0456	3.4991	0.000938518	0.198529
ENSG00000187103	0.960309	0.875408	3.49547	0.000940296	0.198529
ENSG00000199135	-1.95036	-0.689878	-3.49535	0.000949803	0.198529
ENSG00000134873	-1.52625	-0.876706	-3.49378	0.000953036	0.198529
ENSG00000261842	-1.72471	-1.14869	-3.49083	0.000953741	0.198529
ENSG00000233216	1.24626	0.305201	3.49297	0.000957002	0.198529
ENSG00000165868	0.491648	7.59275	3.49146	0.000961321	0.198529
ENSG00000186684	1.28525	3.07992	3.4818	0.000980476	0.200218
ENSG00000279330	0.990869	0.723041	3.48106	0.000982691	0.200218
ENSG00000165304	1.31824	-2.49505	3.47504	0.00101134	0.201101
ENSG00000153707	-0.444486	8.68106	-3.46981	0.00101705	0.201101
ENSG00000163586	-2.14613	-0.939045	-3.47061	0.00102115	0.201101
ENSG00000102547	0.518666	4.28385	3.47045	0.00102434	0.201101
ENSG00000213785	1.82096	-1.71911	3.46741	0.00102451	0.201101
ENSG00000099338	1.09315	5.13502	3.46538	0.00103451	0.201101
ENSG00000174453	0.731786	3.31073	3.46595	0.00103828	0.201101
ENSG00000285597	0.94959	0.463698	3.46246	0.00104009	0.201101
ENSG00000285079	1.32208	-2.68934	3.45788	0.00105472	0.201101
ENSG00000111799	1.22794	6.40419	3.45598	0.00106083	0.201101
ENSG00000248132	-2.3162	-1.40639	-3.4546	0.00107433	0.201101
ENSG00000131914	-2.36492	-1.58012	-3.45418	0.00107677	0.201101
ENSG00000145920	0.745928	6.84283	3.45237	0.00108187	0.201101
ENSG00000213659	0.736146	1.20319	3.45271	0.00108281	0.201101
ENSG00000213699	0.462062	4.76936	3.45091	0.00108695	0.201101
ENSG00000260912	0.917132	0.847696	3.44616	0.00109301	0.201101
ENSG00000165633	-0.678685	4.31117	-3.44093	0.00111705	0.201407
ENSG00000230935	0.695359	0.439445	3.44126	0.00112052	0.201407
ENSG00000240589	0.688236	1.55713	3.43955	0.00112473	0.201407
ENSG00000163347	1.55094	0.623264	3.43757	0.00113268	0.201407
ENSG00000262074	1.07724	2.6301	3.43403	0.0011388	0.201407
ENSG00000107223	-0.496877	4.80714	-3.43042	0.00114655	0.201407
ENSG00000169660	-0.621185	4.81237	-3.43301	0.00114738	0.201407
ENSG00000261318	1.35052	-0.177985	3.42907	0.00115125	0.201407
ENSG00000125249	0.433027	4.67588	3.42979	0.0011599	0.201407
ENSG00000223733	1.244	-0.827147	3.42965	0.00116102	0.201407
ENSG00000183307	0.552376	2.79879	3.42245	0.00117459	0.201749
ENSG00000162643	1.24202	0.365852	3.42197	0.00117628	0.201749
ENSG00000283696	-1.70877	-0.781028	-3.41936	0.00118564	0.202211
ENSG00000144891	2.02392	-0.635526	3.42073	0.00119239	0.202227
ENSG00000260332	1.64349	-3.01788	3.41678	0.00120424	0.202864
ENSG00000127863	0.892376	2.82196	3.41544	0.00120952	0.202864
ENSG00000272150	0.582134	1.86862	3.41006	0.00121945	0.202898
ENSG00000251408	0.695983	2.59246	3.40733	0.00122958	0.202898
ENSG00000285598	-2.88986	0.376227	-3.40963	0.0012319	0.202898
ENSG00000157404	-1.84425	5.83169	-3.40844	0.00123645	0.202898
ENSG00000173406	1.08901	5.26624	3.4011	0.00125908	0.204756
ENSG00000260100	1.54268	-2.87985	3.40055	0.00126582	0.204756
ENSG00000189184	0.806649	3.16566	3.39687	0.00127802	0.204756
ENSG00000116819	-0.934411	4.24128	-3.39476	0.00128436	0.204756
ENSG00000224243	1.25934	-0.731771	3.39174	0.00128882	0.204756
ENSG00000244183	1.15703	-0.324883	3.39322	0.00129182	0.204756
ENSG00000163516	-0.519628	7.12549	-3.39065	0.0013006	0.204756
ENSG00000259554	0.995697	0.596394	3.39097	0.00130173	0.204756
ENSG00000254266	-1.5026	-2.63653	-3.38175	0.0013282	0.207323
ENSG00000214944	0.776325	5.31315	3.38321	0.00133171	0.207323
ENSG00000259460	-1.95671	0.135684	-3.37998	0.00134417	0.207798
ENSG00000213221	-1.27273	0.167806	-3.37184	0.00136841	0.207798
ENSG00000232949	1.48924	-2.56261	3.37178	0.00136864	0.207798
ENSG00000178935	0.477134	4.16846	3.36743	0.00138663	0.207798
ENSG00000207205	1.05066	0.80955	3.36892	0.00139144	0.207798
ENSG00000224318	0.70707	1.17525	3.36423	0.00140003	0.207798
ENSG00000196083	1.15495	4.0405	3.36661	0.00140069	0.207798
ENSG00000065135	0.301111	6.57643	3.36401	0.00140098	0.207798
ENSG00000283982	0.912941	3.79966	3.36192	0.00142184	0.207798
ENSG00000259642	0.693055	1.21366	3.36127	0.00142201	0.207798
ENSG00000151090	0.492376	4.7549	3.3598	0.0014273	0.207798
ENSG00000198597	-0.721242	5.71436	-3.35761	0.00142811	0.207798
ENSG00000254678	1.47831	-1.67706	3.35608	0.0014347	0.207798
ENSG00000270277	0.73699	1.63648	3.35815	0.0014392	0.207798
ENSG00000163606	1.14785	0.228142	3.35273	0.00144919	0.207798
ENSG00000123901	0.817001	1.45427	3.3522	0.0014633	0.207798
ENSG00000110906	0.428908	5.62486	3.35214	0.00146379	0.207798
ENSG00000123892	-1.90015	-2.5844	-3.34928	0.00146421	0.207798
ENSG00000112242	0.467145	4.2033	3.35104	0.0014679	0.207798
ENSG00000146376	1.05161	4.80668	3.34759	0.00147165	0.207798
ENSG00000232759	1.20752	1.12619	3.33591	0.001524	0.212926
ENSG00000230945	1.52339	-2.83089	3.33528	0.00152685	0.212926
ENSG00000221745	1.3039	-1.35881	3.33663	0.00153272	0.212926
ENSG00000095777	-1.28545	3.53624	-3.3329	0.00155189	0.212926
ENSG00000259946	1.20366	2.81574	3.3293	0.00155747	0.212926
ENSG00000232056	1.56439	-2.43936	3.32358	0.00158112	0.212926
ENSG00000239705	1.30736	-1.44453	3.32231	0.00158712	0.212926
ENSG00000230534	0.873464	0.29266	3.32207	0.00158828	0.212926
ENSG00000170266	0.38508	4.94403	3.32338	0.00159407	0.212926
ENSG00000260920	0.523445	2.92812	3.32137	0.0016052	0.212926
ENSG00000237232	-1.69549	-2.75423	-3.31774	0.0016089	0.212926
ENSG00000101204	0.733468	4.8152	3.31939	0.00161042	0.212926
ENSG00000255746	1.18649	0.0429361	3.31577	0.00161838	0.212926
ENSG00000239873	1.09701	1.84996	3.31816	0.00161918	0.212926
ENSG00000260589	0.720748	1.05464	3.31601	0.00162769	0.212926
ENSG00000139410	0.765544	1.85679	3.31288	0.00164231	0.212926
ENSG00000256420	0.683629	1.8209	3.31349	0.0016437	0.212926
ENSG00000229014	0.886605	1.18206	3.30909	0.0016509	0.212926
ENSG00000207761	0.996478	0.360529	3.31174	0.00165187	0.212926
ENSG00000279462	0.763568	1.9491	3.30943	0.00165667	0.212926
ENSG00000106588	0.431086	3.05863	3.30964	0.00165694	0.212926
ENSG00000270820	0.578314	2.62434	3.30813	0.00166776	0.212926
ENSG00000215452	-1.30685	-0.939672	-3.30243	0.00168389	0.212926
ENSG00000160838	-2.05621	-1.21116	-3.30207	0.00168572	0.212926
ENSG00000105198	1.42812	0.0441866	3.30121	0.00169002	0.212926
ENSG00000272906	0.663177	1.8025	3.30386	0.00169033	0.212926
ENSG00000100311	0.879705	3.00429	3.29925	0.00170698	0.213473
ENSG00000187688	1.03011	3.05799	3.29782	0.0017112	0.213473
ENSG00000138376	0.686798	2.23955	3.29537	0.00173133	0.213473
ENSG00000151458	0.591926	5.15525	3.29399	0.00173698	0.213473
ENSG00000266580	-1.63824	-1.19187	-3.29087	0.00174274	0.213473
ENSG00000132967	-0.900354	1.4039	-3.28947	0.00176521	0.213473
ENSG00000206573	0.308566	5.69985	3.287	0.00176784	0.213473
ENSG00000172318	0.791707	3.52758	3.28844	0.00176913	0.213473
ENSG00000102796	-0.504849	2.75896	-3.28785	0.00177274	0.213473
ENSG00000269986	1.41734	-2.41269	3.2861	0.00178315	0.213473
ENSG00000173852	-0.934586	5.05441	-3.28275	0.00178517	0.213473
ENSG00000215246	1.32175	0.74508	3.28253	0.00178634	0.213473
ENSG00000137509	0.580933	5.43828	3.28351	0.00179558	0.213473
ENSG00000232558	0.991363	0.661782	3.28109	0.00180675	0.213473
ENSG00000143333	0.896805	3.29607	3.28068	0.00180773	0.213473
ENSG00000276115	0.4541	3.95747	3.27617	0.00182031	0.213473
ENSG00000107105	0.800509	5.99462	3.27831	0.00182225	0.213473
ENSG00000278338	1.14194	-0.907522	3.2755	0.0018239	0.213473
ENSG00000125675	0.411305	7.4927	3.27469	0.00182828	0.213473
ENSG00000232780	1.3135	-0.0341848	3.27362	0.0018472	0.214855
ENSG00000233967	0.659802	2.50563	3.2654	0.00187919	0.217538
ENSG00000228944	1.18263	-2.55739	3.26443	0.00188459	0.217538
ENSG00000109452	0.908016	5.45903	3.26344	0.00190118	0.218622
ENSG00000164776	-0.718308	1.71985	-3.25997	0.00192192	0.220172
ENSG00000000003	0.773549	1.52952	3.25374	0.00195876	0.221791
ENSG00000184058	-1.88713	-1.79752	-3.24974	0.00196807	0.221791
ENSG00000263503	2.70809	-1.07664	3.24938	0.0019754	0.221791
ENSG00000134121	0.51695	7.58165	3.24827	0.0019766	0.221791
ENSG00000242661	1.01017	0.262499	3.25095	0.00197707	0.221791
ENSG00000198739	0.595823	5.14058	3.24967	0.00198118	0.221791
ENSG00000146054	-1.21811	4.06934	-3.24729	0.00199672	0.221791
ENSG00000270574	0.589581	2.1391	3.2408	0.00203742	0.221791
ENSG00000253284	0.629062	5.61802	3.23751	0.00204023	0.221791
ENSG00000182985	-0.509552	7.42256	-3.23749	0.00204848	0.221791
ENSG00000143603	0.9982	5.65625	3.23639	0.00205609	0.221791
ENSG00000103175	0.734637	2.97818	3.2328	0.00206866	0.221791
ENSG00000234665	1.26585	2.66916	3.23423	0.00207497	0.221791
ENSG00000224384	-1.85797	-2.75422	-3.23388	0.00207615	0.221791
ENSG00000100095	0.483222	6.57754	3.23275	0.00208223	0.221791
ENSG00000223561	1.2935	-1.42015	3.2295	0.00208877	0.221791
ENSG00000196862	-2.09075	2.20648	-3.23175	0.00209252	0.221791
ENSG00000166828	-1.84779	-2.81047	-3.2284	0.00209555	0.221791
ENSG00000224613	0.951544	-0.200041	3.23076	0.00209756	0.221791
ENSG00000256906	1.44302	-2.82424	3.22677	0.00210563	0.221791
ENSG00000267123	-2.26233	-0.180966	-3.22878	0.00210983	0.221791
ENSG00000137831	1.33242	5.72511	3.22585	0.00211132	0.221791
ENSG00000162694	0.449818	4.68656	3.2281	0.00211282	0.221791
ENSG00000162849	0.64362	5.94138	3.2268	0.00211704	0.221791
ENSG00000267640	0.538698	4.14306	3.2258	0.0021187	0.221791
ENSG00000234125	1.60787	-2.71535	3.22184	0.00213625	0.222174
ENSG00000144535	-0.432579	7.17458	-3.22427	0.002137	0.222174
ENSG00000224822	0.721751	1.83077	3.21484	0.00218056	0.223751
ENSG00000171877	-0.559879	5.97663	-3.21585	0.00218712	0.223751
ENSG00000249158	-0.471002	3.32466	-3.21648	0.00218792	0.223751
ENSG00000249861	1.39013	-0.125361	3.21487	0.00218953	0.223751
ENSG00000152642	0.377522	4.57569	3.21318	0.00220551	0.223751
ENSG00000150907	-0.986488	3.36907	-3.21116	0.00222168	0.223751
ENSG00000102780	0.695715	6.19417	3.21	0.00222506	0.223751
ENSG00000167600	0.899131	2.45935	3.20804	0.002239	0.223751
ENSG00000074370	1.21972	3.6832	3.20546	0.00224127	0.223751
ENSG00000228779	-1.68893	-2.85792	-3.20408	0.00225031	0.223751
ENSG00000151615	-2.48853	-1.97572	-3.20232	0.00227281	0.223751
ENSG00000258544	1.51506	-2.72562	3.2004	0.00227782	0.223751
ENSG00000237080	-1.72303	-2.02288	-3.19886	0.0022849	0.223751
ENSG00000163357	-1.85104	-3.16831	-3.19844	0.0022877	0.223751
ENSG00000229235	1.08357	0.311253	3.19743	0.00229449	0.223751
ENSG00000176933	1.38061	-1.03464	3.1977	0.0023058	0.223751
ENSG00000275198	0.912203	0.277557	3.19573	0.0023059	0.223751
ENSG00000153832	-0.480927	3.33079	-3.19524	0.00230921	0.223751
ENSG00000077044	-0.452461	7.02117	-3.19681	0.00231209	0.223751
ENSG00000097096	0.737799	2.26241	3.19453	0.00232147	0.223751
ENSG00000280639	1.63666	-0.712643	3.19278	0.00232582	0.223751
ENSG00000211856	-1.53359	-2.87227	-3.19241	0.00232833	0.223751
ENSG00000268153	1.29989	-0.258878	3.19436	0.00232937	0.223751
ENSG00000263426	1.18874	8.81104	3.19389	0.00233144	0.223751
ENSG00000260897	1.5692	-2.8201	3.19015	0.00234373	0.223751
ENSG00000264598	1.2477	-0.85196	3.19014	0.00234379	0.223751
ENSG00000280098	1.12708	0.473331	3.19072	0.00235803	0.224227
ENSG00000244502	0.925936	-0.55324	3.1865	0.00236883	0.224227
ENSG00000273768	0.896871	1.68807	3.18883	0.00237093	0.224227
ENSG00000272583	1.11215	-0.991755	3.1868	0.00238402	0.224469
ENSG00000237807	1.33659	-1.62596	3.18495	0.002393	0.224469
ENSG00000130813	-0.565747	5.90193	-3.18263	0.00239567	0.224469
ENSG00000257680	0.473783	3.78196	3.1803	0.00242483	0.226045
ENSG00000111405	-2.05841	-1.17054	-3.17902	0.00242739	0.226045
ENSG00000227232	-1.00109	2.38672	-3.17762	0.00244691	0.227158
ENSG00000276765	-1.59686	-2.26351	-3.17332	0.0024615	0.227158
ENSG00000261251	0.551755	1.11332	3.17559	0.00246179	0.227158
ENSG00000100744	0.361857	2.92489	3.17301	0.00248221	0.227875
ENSG00000198429	0.458887	4.39838	3.17011	0.00248457	0.227875
ENSG00000260062	1.58302	-1.93592	3.16893	0.00250871	0.228275
ENSG00000200275	1.42789	-0.757974	3.1665	0.00251076	0.228275
ENSG00000269959	0.705034	2.06416	3.16604	0.00251407	0.228275
ENSG00000223496	0.383474	5.52583	3.16446	0.00252568	0.228275
ENSG00000206588	1.46179	3.54687	3.16601	0.00252653	0.228275
ENSG00000254226	0.579898	2.71843	3.16484	0.0025392	0.228739
ENSG00000254786	1.84621	-3.13547	3.15957	0.00256179	0.228845
ENSG00000258649	1.3351	-2.33781	3.16127	0.00256579	0.228845
ENSG00000168060	-1.65207	-2.30268	-3.15848	0.00256984	0.228845
ENSG00000227879	-1.35999	2.68854	-3.15733	0.00257844	0.228845
ENSG00000226232	-1.70559	-2.07221	-3.15785	0.00257981	0.228845
ENSG00000143514	-0.875996	4.02218	-3.15817	0.00258594	0.228845
ENSG00000178947	0.558836	4.72364	3.15551	0.00260034	0.228845
ENSG00000094804	0.533807	2.78284	3.15437	0.00260068	0.228845
ENSG00000232623	0.661492	0.839643	3.15523	0.00261124	0.22911
ENSG00000157600	0.528099	4.35834	3.15241	0.00262466	0.229623
ENSG00000181211	0.805288	3.64887	3.15173	0.0026369	0.230032
ENSG00000141560	-0.395984	3.87897	-3.14859	0.00265415	0.230873
ENSG00000115896	-0.505664	6.50502	-3.14774	0.00266703	0.23133
ENSG00000265140	1.45413	-1.18961	3.14692	0.00267767	0.231591
ENSG00000232192	1.25733	-2.01386	3.14253	0.00269139	0.232117
ENSG00000178338	0.546176	5.22078	3.13986	0.00271223	0.233252
ENSG00000228495	1.18626	0.234301	3.13596	0.002743	0.235232
ENSG00000234352	-1.57736	-0.784736	-3.13688	0.00275613	0.23566
ENSG00000265991	1.11578	-0.440378	3.13338	0.00276352	0.23566
ENSG00000260930	-1.99781	-2.3033	-3.1315	0.00277856	0.236279
ENSG00000226053	1.30016	0.0762509	3.13011	0.00278972	0.236565
ENSG00000078295	1.07387	5.77858	3.12912	0.00280329	0.237054
ENSG00000248049	0.403606	5.57087	3.12621	0.00282126	0.23791
ENSG00000276147	1.27076	-2.85901	3.12603	0.00284033	0.238852
ENSG00000249240	1.14882	-0.682358	3.12395	0.00285499	0.238852
ENSG00000175426	1.08267	3.04093	3.12249	0.0028654	0.238852
ENSG00000079691	-0.623615	6.51244	-3.12253	0.00287125	0.238852
ENSG00000130340	-0.376535	6.36541	-3.11973	0.00288069	0.238852
ENSG00000221990	0.544731	1.87984	3.1189	0.00288132	0.238852
ENSG00000198909	-0.257944	6.23868	-3.11987	0.0028875	0.238852
ENSG00000266498	0.503451	2.43172	3.11402	0.00292212	0.241059
ENSG00000279310	0.94222	0.223327	3.11268	0.0029334	0.241334
ENSG00000199455	1.15225	-1.12336	3.11225	0.00295749	0.242508
ENSG00000267474	0.628465	1.92965	3.10983	0.00296628	0.242508
ENSG00000223416	1.09662	1.33311	3.10954	0.00297163	0.242508
ENSG00000145721	1.26779	-0.517485	3.1011	0.00303267	0.244188
ENSG00000272880	1.23632	-2.49704	3.10217	0.00303908	0.244188
ENSG00000164543	0.872152	2.59632	3.1024	0.00304038	0.244188
ENSG00000270792	-1.63547	-0.319246	-3.10134	0.00304132	0.244188
ENSG00000204356	-0.381483	4.87059	-3.09854	0.003055	0.244188
ENSG00000168528	-1.07436	0.641686	-3.1002	0.00305965	0.244188
ENSG00000163288	0.543372	5.5829	3.0961	0.00308056	0.244188
ENSG00000227671	0.948471	3.66478	3.09674	0.00308219	0.244188
ENSG00000149295	1.14356	3.74138	3.09623	0.00308776	0.244188
ENSG00000243854	0.607346	2.51883	3.09545	0.00309774	0.244188
ENSG00000111728	0.441855	5.8619	3.09481	0.00310757	0.244188
ENSG00000182890	0.524114	2.13037	3.09496	0.00310762	0.244188
ENSG00000119673	-0.829955	1.02307	-3.08799	0.00314884	0.244188
ENSG00000254485	0.940967	-0.0440076	3.08817	0.0031632	0.244188
ENSG00000223916	0.783222	0.539837	3.08866	0.00316476	0.244188
ENSG00000237149	0.765278	1.07928	3.08704	0.00317567	0.244188
ENSG00000277170	0.618497	0.221615	3.08717	0.0031782	0.244188
ENSG00000237233	1.29627	-2.39596	3.08458	0.00317971	0.244188
ENSG00000129682	1.00296	4.27653	3.08584	0.00318413	0.244188
ENSG00000049323	-0.943027	3.92711	-3.08552	0.00318671	0.244188
ENSG00000229926	1.1545	-0.192958	3.08357	0.00318895	0.244188
ENSG00000283335	-1.01395	0.645771	-3.08526	0.00318981	0.244188
ENSG00000172922	-0.465035	5.07409	-3.08419	0.00319711	0.244188
ENSG00000144668	0.692383	4.04587	3.08392	0.00320283	0.244188
ENSG00000072952	1.18284	4.3997	3.08273	0.0032036	0.244188
ENSG00000274560	1.04742	-1.14313	3.08356	0.00321103	0.244188
ENSG00000280987	0.975268	0.085086	3.08272	0.00321571	0.244188
ENSG00000082438	1.40752	4.552	3.08017	0.00322334	0.244188
ENSG00000243715	-1.42191	-1.67495	-3.07884	0.00323235	0.244188
ENSG00000134013	-1.02508	3.21021	-3.07992	0.00323745	0.244188
ENSG00000053747	1.07445	5.29673	3.07916	0.00324158	0.244188
ENSG00000187566	0.548323	1.54458	3.07727	0.00326785	0.244369
ENSG00000279942	-1.76337	-1.70639	-3.07496	0.00326842	0.244369
ENSG00000259439	1.48965	0.0129247	3.0738	0.00327931	0.244369
ENSG00000275023	-0.402254	7.17216	-3.07516	0.00327974	0.244369
ENSG00000153823	0.629633	4.83382	3.07507	0.00328422	0.244369
ENSG00000272746	0.558734	2.87929	3.07214	0.00329488	0.244562
ENSG00000254101	-1.84274	3.15832	-3.07356	0.00330442	0.244672
ENSG00000272129	0.861471	0.819796	3.06973	0.00331757	0.244879
ENSG00000150361	0.971481	5.4637	3.07088	0.00332335	0.244879
ENSG00000250555	-1.6512	-0.528862	-3.06707	0.00334284	0.24544
ENSG00000127334	0.399219	4.95878	3.06824	0.00335175	0.24544
ENSG00000260671	0.866891	1.96135	3.06506	0.00336212	0.24544
ENSG00000157542	0.918746	7.86049	3.06479	0.00336467	0.24544
ENSG00000079482	0.386587	6.5981	3.06462	0.00338128	0.24544
ENSG00000241383	1.51719	-2.1064	3.06236	0.00338812	0.24544
ENSG00000231920	1.19336	-0.495509	3.06396	0.00339344	0.24544
ENSG00000187955	0.898922	3.69435	3.06352	0.00339564	0.24544
ENSG00000260296	-0.846337	2.48646	-3.06006	0.00343473	0.246644
ENSG00000204969	-0.669825	1.51147	-3.0588	0.00343718	0.246644
ENSG00000249618	1.20658	-0.685174	3.0593	0.00344189	0.246644
ENSG00000247498	0.812528	1.77056	3.05653	0.0034448	0.246644
ENSG00000253357	0.822495	2.09809	3.0572	0.00345675	0.246918
ENSG00000187498	-0.799312	5.49973	-3.05568	0.00347378	0.247552
ENSG00000285783	0.930101	-0.588029	3.04988	0.00351067	0.249376
ENSG00000064763	0.699866	3.79528	3.04872	0.00353676	0.249376
ENSG00000279865	0.886726	-0.558119	3.04908	0.00354075	0.249376
ENSG00000259134	-2.07455	-2.02151	-3.04687	0.00354084	0.249376
ENSG00000164039	-0.875821	3.63958	-3.04819	0.00354951	0.249376
ENSG00000227992	0.953392	0.357845	3.04599	0.0035497	0.249376
ENSG00000215475	0.600468	3.76747	3.0474	0.00355687	0.249376
ENSG00000118496	0.352768	5.2757	3.04573	0.00356979	0.249704
ENSG00000065618	-1.51327	-0.376672	-3.04276	0.0035957	0.250079
ENSG00000166839	0.62042	4.9877	3.04266	0.00359797	0.250079
ENSG00000140287	1.5703	-0.0190284	3.04105	0.00359986	0.250079
ENSG00000266805	0.519997	1.70684	3.03883	0.00362263	0.251086
ENSG00000005961	-0.679792	3.857	-3.03004	0.00371409	0.255564
ENSG00000157625	0.35087	5.67285	3.03119	0.00372128	0.255564
ENSG00000270722	0.979883	0.347998	3.03112	0.00372687	0.255564
ENSG00000198173	-1.21262	-0.482747	-3.02837	0.0037316	0.255564
ENSG00000183935	0.633729	2.35574	3.0272	0.00374404	0.255564
ENSG00000049759	0.35568	6.78071	3.02766	0.00375979	0.255564
ENSG00000254707	-1.38241	-0.0805776	-3.0265	0.00377275	0.255564
ENSG00000075275	1.3854	1.22323	3.02581	0.00377637	0.255564
ENSG00000120278	-0.901096	5.51007	-3.02493	0.00377799	0.255564
ENSG00000261575	1.30143	-1.03298	3.02559	0.00377966	0.255564
ENSG00000260483	-1.67902	-1.70412	-3.02384	0.00377983	0.255564
ENSG00000165588	-1.87279	4.83114	-3.0248	0.00379346	0.255915
ENSG00000185985	-0.824941	6.22515	-3.02305	0.00381077	0.256142
ENSG00000222095	0.612973	1.29414	3.02298	0.0038137	0.256142
ENSG00000198960	-0.567889	2.7687	-3.01955	0.00382596	0.256144
ENSG00000137968	0.619244	4.89141	3.02117	0.0038306	0.256144
ENSG00000235016	-1.08414	-0.158085	-3.01976	0.00384512	0.256329
ENSG00000170485	-0.991282	6.54167	-3.01947	0.00385025	0.256329
ENSG00000279953	0.811326	-0.087386	3.01732	0.00387606	0.256458
ENSG00000199968	0.916476	0.433805	3.01654	0.00388417	0.256458
ENSG00000257037	1.24191	-2.41885	3.01347	0.00389231	0.256458
ENSG00000243886	-2.31719	-1.17371	-3.01498	0.00390107	0.256458
ENSG00000167767	-1.73323	-2.98887	-3.01155	0.00391345	0.256458
ENSG00000107242	0.56615	4.17934	3.01327	0.00391606	0.256458
ENSG00000213967	-0.635826	3.10279	-3.01268	0.00392661	0.256458
ENSG00000164694	0.977249	0.455396	3.01251	0.00392718	0.256458
ENSG00000182606	0.359093	7.23461	3.01135	0.00392823	0.256458
ENSG00000283341	0.468646	2.87704	3.01086	0.00394528	0.257019
ENSG00000224959	1.05786	-0.277492	3.00921	0.00396264	0.257555
ENSG00000199248	1.08124	-0.858709	3.00513	0.00398496	0.257555
ENSG00000140326	-0.384453	5.00844	-3.00627	0.00398921	0.257555
ENSG00000176584	-1.88992	-2.33922	-3.00466	0.00399026	0.257555
ENSG00000184160	1.29373	-0.384027	3.00486	0.00399891	0.257555
ENSG00000230223	0.895027	2.05016	3.00341	0.00400441	0.257555
ENSG00000263615	1.31224	-2.6749	3.00214	0.00401869	0.257927
ENSG00000269961	1.00188	-0.725846	3.00026	0.00404013	0.258429
ENSG00000107282	0.429228	7.10688	3.00204	0.00404354	0.258429
ENSG00000279598	0.510599	3.09205	3.00101	0.00405405	0.258557
ENSG00000180044	0.963502	-0.222677	2.99723	0.00410128	0.260748
ENSG00000278131	1.25433	-1.99499	2.99455	0.00410559	0.260748
ENSG00000256955	-1.70691	-2.98906	-2.993	0.00413887	0.261175
ENSG00000248610	0.984454	2.59012	2.99141	0.004142	0.261175
ENSG00000204227	-0.423136	5.68234	-2.99103	0.00414645	0.261175
ENSG00000281005	0.760909	2.13319	2.99195	0.00415793	0.261175
ENSG00000036828	-1.98152	3.40515	-2.99048	0.00417868	0.261175
ENSG00000159496	-0.876937	1.22926	-2.98651	0.00419947	0.261175
ENSG00000164199	0.922643	7.01843	2.98769	0.00420233	0.261175
ENSG00000124120	0.376626	4.13304	2.98725	0.00421269	0.261175
ENSG00000212549	1.41802	-2.58985	2.98483	0.00421936	0.261175
ENSG00000225206	1.23681	5.79516	2.98579	0.00421969	0.261175
ENSG00000223911	-1.31823	-2.48827	-2.9816	0.0042578	0.261175
ENSG00000264964	1.03436	-1.36501	2.98108	0.00429034	0.261175
ENSG00000233251	0.912119	2.49171	2.97963	0.00430063	0.261175
ENSG00000105894	-0.878768	4.09688	-2.97891	0.00430662	0.261175
ENSG00000280349	1.44092	-1.78351	2.97898	0.00431314	0.261175
ENSG00000265713	0.447716	3.39608	2.97852	0.00431805	0.261175
ENSG00000211863	-1.52447	-1.49645	-2.97842	0.00431939	0.261175
ENSG00000153774	-0.368597	5.29343	-2.97753	0.00432723	0.261175
ENSG00000134323	-1.11904	3.1596	-2.9778	0.00432992	0.261175
ENSG00000262209	-0.472655	3.62578	-2.97738	0.00433485	0.261175
ENSG00000100897	-0.272381	5.12537	-2.97517	0.00433528	0.261175
ENSG00000149527	-0.855639	6.281	-2.97565	0.00434417	0.261175
ENSG00000204514	0.310262	6.18212	2.97448	0.00436116	0.261175
ENSG00000234390	0.719993	0.808791	2.97287	0.00436335	0.261175
ENSG00000080189	-0.421656	5.70347	-2.97459	0.00436603	0.261175
ENSG00000223813	-1.0101	0.858801	-2.97363	0.00437535	0.261175
ENSG00000230257	-1.88125	-2.68039	-2.9716	0.00437887	0.261175
ENSG00000005381	-1.18468	0.868922	-2.9738	0.00437932	0.261175
ENSG00000143786	0.336638	4.22973	2.97068	0.0043902	0.261175
ENSG00000168875	-1.8201	4.57014	-2.97247	0.00439368	0.261175
ENSG00000184903	0.400984	4.19238	2.96991	0.00439963	0.261175
ENSG00000224530	1.15754	-1.04632	2.96746	0.00442992	0.261175
ENSG00000256533	0.587824	1.64459	2.96926	0.00443533	0.261175
ENSG00000183908	0.69286	4.41874	2.96872	0.0044359	0.261175
ENSG00000275481	0.445205	2.71329	2.96629	0.00444444	0.261175
ENSG00000154274	0.992015	0.49534	2.96815	0.00444753	0.261175
ENSG00000254427	0.63191	0.980358	2.96546	0.00447219	0.261175
ENSG00000279951	0.627822	0.822269	2.96384	0.00447506	0.261175
ENSG00000168785	-0.640296	5.579	-2.96181	0.00451061	0.261175
ENSG00000229827	1.07753	-1.3221	2.96236	0.00451135	0.261175
ENSG00000147119	0.85342	1.4134	2.96187	0.00452409	0.261175
ENSG00000165914	-0.40913	6.97958	-2.9611	0.00452652	0.261175
ENSG00000143147	0.690069	5.30041	2.95903	0.00453561	0.261175
ENSG00000280322	1.00328	-0.321937	2.96098	0.00453753	0.261175
ENSG00000151233	0.37967	5.19646	2.95939	0.00453881	0.261175
ENSG00000280277	1.26882	-0.913976	2.95828	0.00454512	0.261175
ENSG00000178921	-0.38873	4.56736	-2.96006	0.00454577	0.261175
ENSG00000177103	-0.944725	6.80312	-2.95958	0.00455267	0.261175
ENSG00000182405	0.415819	3.30099	2.95884	0.00456392	0.261175
ENSG00000139117	1.02836	3.78417	2.9579	0.00456471	0.261175
ENSG00000255893	1.02873	-1.19479	2.95827	0.00456934	0.261175
ENSG00000225933	1.28636	-1.64364	2.95638	0.00456939	0.261175
ENSG00000169242	-1.11446	1.37561	-2.95581	0.00457667	0.261175
ENSG00000279035	0.846934	0.145657	2.95641	0.0045863	0.261175
ENSG00000235121	-1.26444	-1.90532	-2.95573	0.00458661	0.261175
ENSG00000011201	0.885285	2.70923	2.95554	0.0046	0.261175
ENSG00000107593	-1.79661	-1.9376	-2.95488	0.00460421	0.261175
ENSG00000233922	-1.25469	0.297031	-2.955	0.0046113	0.261175
ENSG00000154478	0.802484	4.78247	2.95194	0.00462639	0.261542
ENSG00000133874	-1.26998	0.150088	-2.95088	0.00464003	0.261545
ENSG00000243287	1.07849	-1.64947	2.95269	0.00464487	0.261545
ENSG00000174951	1.10695	0.236952	2.95128	0.00466272	0.261545
ENSG00000286260	-1.72152	-1.54535	-2.94936	0.00468394	0.261545
ENSG00000169118	0.307993	4.82864	2.94891	0.0046879	0.261545
ENSG00000233670	1.04806	1.50328	2.94769	0.00469925	0.261545
ENSG00000236166	1.19515	-0.117587	2.946	0.00470364	0.261545
ENSG00000088926	-1.32772	2.8583	-2.94779	0.00470922	0.261545
ENSG00000232838	-0.635509	1.74505	-2.9475	0.00471158	0.261545
ENSG00000212100	1.24426	-1.32353	2.94754	0.00471259	0.261545
ENSG00000230194	1.24048	-1.39933	2.94645	0.00472585	0.261802
ENSG00000092607	-1.72061	-0.7176	-2.944	0.00474217	0.262227
ENSG00000213199	-0.878273	4.31435	-2.94044	0.00477708	0.263486
ENSG00000140400	-0.423085	7.23452	-2.93916	0.00479414	0.263486
ENSG00000117280	0.550099	3.13291	2.94098	0.00479499	0.263486
ENSG00000285817	1.43283	-2.33551	2.94024	0.00479964	0.263486
ENSG00000258445	0.424908	2.56497	2.94004	0.00480894	0.26352
ENSG00000253154	-1.65321	-2.91453	-2.93726	0.00482793	0.264084
ENSG00000096746	-0.338223	6.80852	-2.93609	0.00484779	0.26409
ENSG00000163513	1.57737	3.75746	2.93534	0.00486115	0.26409
ENSG00000118733	0.559393	5.17151	2.93489	0.00487104	0.26409
ENSG00000237636	-1.23376	5.10599	-2.93313	0.00487537	0.26409
ENSG00000227207	-2.62509	-1.43145	-2.93155	0.00489682	0.26409
ENSG00000188611	1.23921	2.57419	2.93243	0.00489878	0.26409
ENSG00000162383	-2.49477	1.64097	-2.93309	0.00490344	0.26409
ENSG00000237207	-2.01177	-3.1356	-2.93094	0.00490515	0.26409
ENSG00000273702	0.778193	0.917002	2.93283	0.00490704	0.26409
ENSG00000225213	0.578382	1.70279	2.93231	0.00491504	0.26409
ENSG00000207609	0.641592	1.57372	2.9306	0.00493648	0.264347
ENSG00000267575	0.429175	4.98408	2.92834	0.0049407	0.264347
ENSG00000011638	0.956684	0.270351	2.92892	0.00495708	0.264347
ENSG00000279289	0.847148	2.70761	2.92839	0.00496432	0.264347
ENSG00000171992	0.523253	4.56869	2.92724	0.0049784	0.264347
ENSG00000267784	0.469527	3.72784	2.92558	0.00497874	0.264347
ENSG00000279814	1.37848	0.43535	2.92675	0.00498078	0.264347
ENSG00000180269	1.13378	0.687638	2.92564	0.00500434	0.265134
ENSG00000159248	0.678418	1.47122	2.9248	0.00501855	0.265424
ENSG00000238390	0.535237	1.68168	2.92414	0.00502882	0.265504
ENSG00000254968	0.853074	-0.00583492	2.92125	0.0050389	0.265574
ENSG00000175984	-1.26012	2.56621	-2.92176	0.00506031	0.265582
ENSG00000277692	0.843669	-0.0636621	2.92077	0.00507174	0.265582
ENSG00000225689	1.09169	-1.27335	2.91869	0.00507474	0.265582
ENSG00000162438	-1.72031	-1.88112	-2.91857	0.0050765	0.265582
ENSG00000260172	-1.52578	-3.4426	-2.9182	0.005089	0.265582
ENSG00000015413	-1.80951	-1.25607	-2.91938	0.00509153	0.265582
ENSG00000283556	1.00315	0.163473	2.91493	0.00512794	0.266722
ENSG00000226659	1.524	-3.42739	2.91419	0.00513847	0.266722
ENSG00000172572	-1.19882	4.99066	-2.91483	0.00515823	0.266722
ENSG00000164825	-1.68156	-2.95247	-2.9127	0.00515974	0.266722
ENSG00000256271	-1.41757	-2.06465	-2.91243	0.00516355	0.266722
ENSG00000121101	-0.677994	1.97673	-2.91226	0.0051661	0.266722
ENSG00000253910	-0.494962	4.02222	-2.91327	0.00518123	0.266818
ENSG00000256982	-0.996942	1.94279	-2.91243	0.00519316	0.266818
ENSG00000183570	-1.32691	5.8719	-2.91196	0.00519433	0.266818
ENSG00000070159	1.08584	2.83101	2.90867	0.00521762	0.266965
ENSG00000162032	-0.497941	4.34002	-2.90941	0.00522395	0.266965
ENSG00000202017	1.41899	-2.16318	2.9067	0.00527661	0.266965
ENSG00000120337	0.825051	0.164864	2.90601	0.00528635	0.266965
ENSG00000165985	1.71821	0.272762	2.90545	0.00528987	0.266965
ENSG00000267607	-1.69752	-1.26091	-2.90429	0.00531031	0.266965
ENSG00000260105	-1.45441	-2.25257	-2.90302	0.00531103	0.266965
ENSG00000246889	-0.496723	2.59435	-2.90298	0.00532288	0.266965
ENSG00000176510	-1.4189	-2.89618	-2.90094	0.00533039	0.266965
ENSG00000201379	1.51889	-1.52515	2.90225	0.00533199	0.266965
ENSG00000252980	0.781406	-0.34938	2.90282	0.00533351	0.266965
ENSG00000260862	-0.604679	2.64158	-2.9025	0.00533845	0.266965
ENSG00000182544	0.664892	1.28457	2.90234	0.00534039	0.266965
ENSG00000180875	-1.18028	4.77279	-2.90012	0.00537002	0.266965
ENSG00000116922	0.384122	3.55228	2.89973	0.00537314	0.266965
ENSG00000148288	0.612103	4.18493	2.8978	0.00538922	0.266965
ENSG00000135862	0.64239	6.0051	2.89764	0.00539604	0.266965
ENSG00000130475	-0.474664	6.02523	-2.89628	0.00539947	0.266965
ENSG00000163710	-1.70249	2.74253	-2.89814	0.00540201	0.266965
ENSG00000239513	-1.69289	3.84064	-2.89812	0.00540266	0.266965
ENSG00000105397	-0.390474	6.3599	-2.8975	0.00540605	0.266965
ENSG00000271590	0.940602	1.02503	2.89713	0.0054116	0.266965
ENSG00000099954	-0.892567	5.9178	-2.89704	0.00541492	0.266965
ENSG00000184924	0.747409	0.131135	2.89666	0.00542539	0.266965
ENSG00000249679	-0.970986	-0.3846	-2.8943	0.00542905	0.266965
ENSG00000122705	-0.260676	5.16525	-2.89308	0.00544729	0.266965
ENSG00000112319	1.29063	2.78213	2.89444	0.00545115	0.266965
ENSG00000248424	-1.63832	-2.15979	-2.89259	0.00545472	0.266965
ENSG00000188199	-1.53169	-2.21724	-2.89148	0.00547141	0.266965
ENSG00000235095	1.22617	-2.80522	2.89013	0.00549189	0.266965
ENSG00000188133	-1.91514	2.58535	-2.89182	0.00549573	0.266965
ENSG00000272829	1.29065	-2.0365	2.88986	0.00549586	0.266965
ENSG00000122643	-0.331119	4.54991	-2.8904	0.0055004	0.266965
ENSG00000137337	-0.48642	6.48426	-2.89039	0.00550691	0.266965
ENSG00000248466	-1.53956	-1.40044	-2.89004	0.00551143	0.266965
ENSG00000269345	1.44198	-2.46884	2.89074	0.00551377	0.266965
ENSG00000247134	1.17151	-0.604535	2.88897	0.0055335	0.267494
ENSG00000215218	0.511736	4.07005	2.88768	0.00555981	0.267745
ENSG00000065717	-0.824332	6.78071	-2.88674	0.00556343	0.267745
ENSG00000171291	0.328265	6.04047	2.88486	0.00557218	0.267745
ENSG00000143995	-1.07057	4.23365	-2.88457	0.0055767	0.267745
ENSG00000260848	0.857938	1.33722	2.8856	0.0055828	0.267745
ENSG00000236478	-1.5972	-2.48667	-2.88292	0.00560196	0.26824
ENSG00000262693	1.16521	-1.55919	2.88337	0.00562658	0.268714
ENSG00000230729	1.3077	-2.82215	2.88081	0.00563461	0.268714
ENSG00000143032	1.55404	-1.21961	2.88054	0.00563882	0.268714
ENSG00000283273	1.45548	-1.58949	2.8815	0.00565103	0.268714
ENSG00000278897	0.416748	4.61519	2.87995	0.00565612	0.268714
ENSG00000136518	-0.619685	1.90256	-2.87836	0.00567282	0.269086
ENSG00000158864	-0.322566	6.41888	-2.87725	0.00569009	0.269485
ENSG00000154065	0.628903	4.74571	2.87724	0.00571676	0.269953
ENSG00000224271	-1.08531	0.834331	-2.8751	0.00572385	0.269953
ENSG00000276603	0.601445	1.28994	2.87643	0.00572679	0.269953
ENSG00000114770	0.300847	8.32321	2.87426	0.00573717	0.269953
ENSG00000231907	0.993792	-1.20291	2.87369	0.00574611	0.269953
ENSG00000086289	0.45906	5.1583	2.87504	0.00575573	0.269953
ENSG00000246477	-1.41401	-2.16317	-2.87172	0.00577729	0.269953
ENSG00000037749	0.280438	4.83092	2.87151	0.00579012	0.269953
ENSG00000257803	1.40409	-2.26035	2.87233	0.0057941	0.269953
ENSG00000227868	-1.46351	-1.12407	-2.87101	0.00579791	0.269953
ENSG00000274750	-1.87903	-1.5866	-2.87197	0.00580322	0.269953
ENSG00000265241	-0.278918	4.75836	-2.87082	0.00580668	0.269953
ENSG00000204435	-0.570517	2.83024	-2.86984	0.00582635	0.270453
ENSG00000266052	1.28595	-3.11859	2.86705	0.00585177	0.271164
ENSG00000110090	0.849816	4.88762	2.86803	0.00585954	0.271164
ENSG00000253006	0.989535	-0.451393	2.8652	0.00588158	0.271588
ENSG00000276791	0.558552	2.2544	2.86479	0.00588822	0.271588
ENSG00000272008	0.583708	1.75885	2.86596	0.00589553	0.271588
ENSG00000176716	-1.43777	1.89197	-2.86412	0.00593171	0.27284
ENSG00000227456	0.501032	2.58057	2.85736	0.00600939	0.275151
ENSG00000207280	0.856823	1.42885	2.85667	0.00604688	0.275151
ENSG00000225342	0.764101	0.291174	2.85505	0.00604749	0.275151
ENSG00000143891	1.29714	-0.358429	2.85632	0.00605218	0.275151
ENSG00000233237	0.701341	5.65611	2.85526	0.00605221	0.275151
ENSG00000168803	0.407447	4.23619	2.85436	0.006059	0.275151
ENSG00000227303	1.50382	-2.78362	2.8545	0.00608789	0.275151
ENSG00000109158	0.718713	5.10809	2.85251	0.00608967	0.275151
ENSG00000157823	0.282879	5.00541	2.8532	0.00609142	0.275151
ENSG00000237854	-0.372276	3.88442	-2.85381	0.00609229	0.275151
ENSG00000139675	-0.522884	3.61171	-2.85421	0.00609372	0.275151
ENSG00000249288	1.3807	-2.72044	2.8519	0.00609998	0.275151
ENSG00000010361	-0.557164	2.94083	-2.85298	0.00610804	0.275151
ENSG00000058335	-0.52151	8.48921	-2.85213	0.00611651	0.275151
ENSG00000214145	-1.41051	-1.70182	-2.8498	0.00615382	0.275151
ENSG00000151892	0.930046	5.93398	2.84926	0.00616156	0.275151
ENSG00000239510	1.24243	-0.691467	2.84815	0.00616282	0.275151
ENSG00000282728	1.29817	-0.99962	2.84948	0.00617117	0.275151
ENSG00000004975	-0.458745	5.45978	-2.84878	0.0061722	0.275151
ENSG00000267213	0.851142	1.29671	2.84904	0.00617223	0.275151
ENSG00000153558	0.350623	5.30295	2.84902	0.00617956	0.275151
ENSG00000196376	0.50502	5.07166	2.84737	0.00619309	0.275151
ENSG00000273419	-1.24809	-0.0967493	-2.84601	0.00619899	0.275151
ENSG00000103066	0.471255	3.79383	2.84685	0.00621202	0.275151
ENSG00000121903	0.430922	4.39049	2.84631	0.00621789	0.275151
ENSG00000197580	0.375881	5.59364	2.84569	0.00622611	0.275151
ENSG00000232969	1.08467	-2.04319	2.84438	0.00622666	0.275151
ENSG00000185716	0.327312	5.35448	2.84429	0.00625084	0.275818
ENSG00000227640	1.25702	0.00652792	2.8421	0.00629489	0.276246
ENSG00000256694	-1.39417	-1.00032	-2.84025	0.00629731	0.276246
ENSG00000176248	-0.328319	5.51887	-2.84024	0.00629739	0.276246
ENSG00000262576	-0.474817	3.9241	-2.84189	0.00629842	0.276246
ENSG00000272663	0.961752	-0.793779	2.83974	0.00630603	0.276246
ENSG00000132164	-1.25089	5.28879	-2.84061	0.00632167	0.276293
ENSG00000266228	0.90834	-0.381427	2.83834	0.00633018	0.276293
ENSG00000250266	1.35648	-0.474818	2.83806	0.00633505	0.276293
ENSG00000173218	1.02607	1.3524	2.83859	0.0063435	0.276293
ENSG00000166263	0.369814	4.41654	2.83629	0.00636557	0.276373
ENSG00000265984	1.00729	-0.608666	2.83556	0.00637834	0.276373
ENSG00000242607	0.713579	3.04284	2.83541	0.00638087	0.276373
ENSG00000227295	-1.51117	-2.55542	-2.83612	0.0063888	0.276373
ENSG00000204248	-0.736557	5.38313	-2.83613	0.00639587	0.276373
ENSG00000163687	-1.90404	-2.33086	-2.83613	0.00639997	0.276373
ENSG00000263105	1.08633	-1.07889	2.83264	0.00642929	0.277082
ENSG00000135912	-0.44469	5.52274	-2.83228	0.00643562	0.277082
ENSG00000163867	0.284185	4.50709	2.83179	0.00644417	0.277082
ENSG00000174448	1.15864	-2.28278	2.83243	0.00645288	0.277082
ENSG00000277556	0.973062	-1.03577	2.83061	0.0064649	0.277126
ENSG00000138308	-1.55243	-2.76174	-2.82972	0.00648069	0.277126
ENSG00000103507	-0.397462	4.43791	-2.82968	0.0064813	0.277126
ENSG00000255014	1.18903	-1.87957	2.82884	0.00652041	0.278196
ENSG00000235595	1.08155	0.620173	2.82855	0.00653221	0.278196
ENSG00000173212	0.69308	2.33241	2.82741	0.00654124	0.278196
ENSG00000162512	0.582054	5.82808	2.82741	0.00654437	0.278196
ENSG00000258417	1.41533	-2.76196	2.8274	0.00655216	0.278196
ENSG00000165092	1.50145	3.74188	2.82293	0.00662366	0.280268
ENSG00000279481	0.598288	1.90455	2.82297	0.00662609	0.280268
ENSG00000248015	-1.12585	1.0073	-2.82328	0.00662888	0.280268
ENSG00000274349	0.447687	3.70416	2.82091	0.00663787	0.280268
ENSG00000172638	-0.53685	3.13524	-2.81977	0.00668502	0.281184
ENSG00000260640	0.928762	-1.03911	2.8181	0.0066887	0.281184
ENSG00000008513	0.915327	4.94736	2.81889	0.00669559	0.281184
ENSG00000255647	0.976839	-0.66944	2.81753	0.0066991	0.281184
ENSG00000104824	-0.254186	6.65054	-2.8184	0.00670589	0.281184
ENSG00000079841	0.522673	7.4731	2.81672	0.00672677	0.281671
ENSG00000269887	0.640493	2.55441	2.817	0.00674082	0.28187
ENSG00000275527	-1.42587	-2.48717	-2.81461	0.00677154	0.282232
ENSG00000169507	1.31033	0.580344	2.81403	0.00677667	0.282232
ENSG00000169515	-1.06814	0.732899	-2.81326	0.00677736	0.282232
ENSG00000164188	-1.64314	2.23937	-2.81014	0.00687091	0.285736
ENSG00000169925	-0.335868	5.40657	-2.80912	0.00688451	0.28591
ENSG00000145386	0.472276	3.61797	2.80697	0.0069026	0.28619
ENSG00000256591	0.334377	3.64416	2.8061	0.00691012	0.28619
ENSG00000204338	-0.929668	0.889784	-2.80536	0.00692398	0.286373
ENSG00000227210	1.14652	-1.71996	2.80446	0.00697685	0.288017
ENSG00000154822	-0.370571	5.66283	-2.80188	0.00698962	0.288017
ENSG00000100784	-0.525931	6.2451	-2.80245	0.00700291	0.288017
ENSG00000231147	-1.57382	-1.27824	-2.80084	0.00700927	0.288017
ENSG00000258776	-2.04575	-1.06539	-2.80194	0.00701115	0.288017
ENSG00000078061	-0.4638	3.70909	-2.80114	0.00702592	0.288163
ENSG00000165973	-0.895939	5.66413	-2.80077	0.00704192	0.288163
ENSG00000161265	-0.557224	1.72296	-2.80007	0.00705326	0.288163
ENSG00000278983	0.461337	4.22757	2.79692	0.00708411	0.288163
ENSG00000185361	0.658724	1.99346	2.79759	0.00708544	0.288163
ENSG00000169618	1.24914	-1.61248	2.79875	0.00708675	0.288163
ENSG00000159917	0.303229	5.22604	2.79768	0.00708782	0.288163
ENSG00000223553	-1.52891	-0.62813	-2.79783	0.00709064	0.288163
ENSG00000169919	-0.358049	5.01206	-2.79682	0.00711809	0.288307
ENSG00000264448	1.12912	-1.39478	2.79431	0.00713419	0.288307
ENSG00000277590	1.07998	0.0225775	2.79412	0.00713793	0.288307
ENSG00000280789	-0.533557	3.8161	-2.79502	0.0071417	0.288307
ENSG00000255020	0.864232	0.487301	2.7952	0.00714495	0.288307
ENSG00000269445	-1.67256	-1.88697	-2.79455	0.00715117	0.288307
ENSG00000140320	0.366076	4.12067	2.79394	0.00716807	0.288605
ENSG00000035928	-0.344931	5.57665	-2.79267	0.00719258	0.289208
ENSG00000115183	-0.849921	7.13759	-2.79088	0.00721671	0.289795
ENSG00000179085	0.592126	1.28221	2.78923	0.00723296	0.290064
ENSG00000047230	-0.383741	4.07316	-2.79015	0.00724537	0.290178
ENSG00000226186	-1.46556	-2.26093	-2.78764	0.00726402	0.290426
ENSG00000198467	-0.932148	4.91837	-2.78839	0.00727549	0.290426
ENSG00000122584	0.817787	3.88809	2.78824	0.00728026	0.290426
ENSG00000275215	1.01284	0.813609	2.78522	0.00731163	0.290556
ENSG00000235615	1.26676	-1.77834	2.78413	0.00733317	0.290556
ENSG00000104635	0.520099	4.71164	2.7851	0.00734846	0.290556
ENSG00000198963	-1.46114	4.30303	-2.78457	0.00736049	0.290556
ENSG00000251452	0.892101	-0.668388	2.78271	0.00736132	0.290556
ENSG00000011304	-0.365222	5.60353	-2.78191	0.00738774	0.290556
ENSG00000101638	0.488954	6.0984	2.78303	0.00738774	0.290556
ENSG00000236744	0.782669	0.614935	2.78292	0.00738959	0.290556
ENSG00000120693	-0.760657	4.57382	-2.78287	0.00738984	0.290556
ENSG00000153822	1.17054	1.32618	2.78124	0.00739048	0.290556
ENSG00000187682	-1.29806	-1.54846	-2.78118	0.00739162	0.290556
ENSG00000271204	0.425744	5.44822	2.78228	0.00739881	0.290556
ENSG00000232546	0.852684	0.605803	2.78024	0.00741054	0.290556
ENSG00000169083	0.556722	3.51643	2.78103	0.00742748	0.290556
ENSG00000258399	0.607436	4.84966	2.78071	0.00743018	0.290556
ENSG00000199065	-0.956027	0.0998047	-2.77891	0.00743714	0.290556
ENSG00000286163	0.786418	-0.0983583	2.78034	0.00744623	0.290556
ENSG00000172062	-0.538831	1.85051	-2.77964	0.00746014	0.290725
ENSG00000273212	-1.6655	-2.83981	-2.77723	0.00747077	0.290766
ENSG00000254469	-0.411773	3.79093	-2.778	0.00749317	0.290932
ENSG00000114999	0.369818	6.25396	2.77731	0.00749421	0.290932
ENSG00000106025	-1.29541	1.53695	-2.77529	0.00750991	0.29117
ENSG00000274210	0.940129	0.331156	2.77592	0.00753029	0.291366
ENSG00000178789	-1.56789	-2.17687	-2.77409	0.00753417	0.291366
ENSG00000185904	0.784853	3.23237	2.77344	0.00757523	0.291736
ENSG00000188730	0.509374	4.76683	2.77275	0.00758005	0.291736
ENSG00000013725	0.827436	1.63451	2.7728	0.00758547	0.291736
ENSG00000154217	-0.475759	5.93772	-2.77199	0.0076082	0.291736
ENSG00000261873	-1.8845	-1.67907	-2.77182	0.00761689	0.291736
ENSG00000155016	0.309029	5.00412	2.76987	0.0076203	0.291736
ENSG00000176055	0.356631	3.81819	2.77076	0.00763523	0.291736
ENSG00000164270	1.00292	2.18124	2.76938	0.00764052	0.291736
ENSG00000162374	0.499474	5.84237	2.77034	0.00764282	0.291736
ENSG00000151746	0.306319	7.76053	2.76872	0.00764383	0.291736
ENSG00000076003	-0.675995	3.05616	-2.76756	0.00766767	0.291736
ENSG00000237861	0.658796	1.10757	2.76873	0.0076691	0.291736
ENSG00000129244	-1.00265	6.10941	-2.76877	0.00767591	0.291736
ENSG00000114054	-0.379763	5.55593	-2.76856	0.00767827	0.291736
ENSG00000114859	-0.426084	5.75807	-2.76593	0.00770137	0.291836
ENSG00000183688	1.18677	1.61494	2.7657	0.00770614	0.291836
ENSG00000112796	0.382943	3.97066	2.76727	0.00770975	0.291836
ENSG00000197724	-0.366303	6.04152	-2.76527	0.00774219	0.292103
ENSG00000126368	-1.06202	4.13898	-2.76501	0.00774889	0.292103
ENSG00000283442	1.26666	-2.45719	2.76368	0.00776413	0.292103
ENSG00000274297	1.36447	-1.75354	2.76233	0.00777634	0.292103
ENSG00000214900	0.534803	2.85546	2.76324	0.00777684	0.292103
ENSG00000273139	0.595621	1.47454	2.76211	0.00778087	0.292103
ENSG00000245532	1.08246	11.525	2.763	0.00778695	0.292103
ENSG00000267470	-0.657207	3.09982	-2.7631	0.00779377	0.292103
ENSG00000285999	0.634449	1.11854	2.76174	0.00781569	0.292533
ENSG00000285836	-1.28483	-1.63742	-2.75993	0.00782643	0.292533
ENSG00000101883	-2.59517	0.952785	-2.76031	0.00783417	0.292533
ENSG00000196531	-0.315398	5.97299	-2.75855	0.0078556	0.292774
ENSG00000105088	0.523398	4.30172	2.75856	0.00786628	0.292774
ENSG00000259066	0.950125	-1.16725	2.75939	0.00787197	0.292774
ENSG00000143473	0.767286	3.04009	2.7586	0.00787919	0.292774
ENSG00000272768	0.619943	1.96905	2.75798	0.00789476	0.292994
ENSG00000235532	-1.30766	-1.99542	-2.75556	0.00791877	0.293388
ENSG00000160318	0.729442	-0.0517009	2.75527	0.00792489	0.293388
ENSG00000286172	1.34509	-2.95764	2.75483	0.00793438	0.293388
ENSG00000080644	-1.64511	3.47358	-2.75597	0.00794689	0.293494
ENSG00000102359	1.71342	2.88851	2.75345	0.00797273	0.29409
ENSG00000144227	-1.00009	3.31348	-2.75418	0.00798624	0.294231
ENSG00000137872	0.745359	6.28367	2.75312	0.00800664	0.294625
ENSG00000144959	0.468026	4.7028	2.75171	0.00802317	0.294724
ENSG00000173614	0.489771	3.49978	2.75042	0.00802874	0.294724
ENSG00000204683	0.657483	2.0213	2.75074	0.00805393	0.29481
ENSG00000163083	0.993184	1.63622	2.75073	0.00805659	0.29481
ENSG00000085719	0.421406	5.69048	2.75047	0.00806022	0.29481
ENSG00000218536	0.696632	-0.468484	2.74951	0.00808704	0.295116
ENSG00000127588	1.15921	-1.39847	2.74921	0.00808802	0.295116
ENSG00000196581	0.612716	6.68483	2.74633	0.00811702	0.295747
ENSG00000171444	0.72198	5.72882	2.74555	0.00813404	0.295747
ENSG00000231440	-1.29139	-0.229891	-2.74594	0.0081631	0.295747
ENSG00000176998	0.981585	-0.701735	2.7453	0.00817815	0.295747
ENSG00000228767	-1.57338	-3.14118	-2.74322	0.00818475	0.295747
ENSG00000049246	-0.620999	7.27504	-2.74438	0.00819304	0.295747
ENSG00000179796	0.519506	5.54865	2.74269	0.00819647	0.295747
ENSG00000136114	-0.708164	2.40811	-2.74354	0.00821552	0.295747
ENSG00000197961	0.305737	5.72163	2.74299	0.00822116	0.295747
ENSG00000197321	-0.66804	5.89708	-2.74275	0.00822828	0.295747
ENSG00000103275	-0.222222	5.27473	-2.74175	0.00825074	0.295747
ENSG00000235085	-1.50998	-2.88267	-2.73988	0.00825818	0.295747
ENSG00000248550	-2.31002	2.27066	-2.74057	0.00828168	0.295747
ENSG00000267302	1.26125	-2.26564	2.73871	0.00828406	0.295747
ENSG00000253210	1.08328	-0.135821	2.73865	0.00828546	0.295747
ENSG00000231539	1.19099	-1.97162	2.73774	0.00830555	0.295747
ENSG00000243649	-1.38548	-0.615545	-2.73764	0.00830779	0.295747
ENSG00000134042	0.753535	1.66504	2.73729	0.00831562	0.295747
ENSG00000129675	0.645994	4.97276	2.73773	0.00832874	0.295747
ENSG00000231437	0.682752	2.40187	2.73764	0.00833216	0.295747
ENSG00000197258	0.935829	3.61987	2.73502	0.00836616	0.295747
ENSG00000139974	0.318951	6.00845	2.73548	0.00838004	0.295747
ENSG00000154310	-0.415756	8.6129	-2.73593	0.00838314	0.295747
ENSG00000197296	0.320041	3.97282	2.73564	0.00838745	0.295747
ENSG00000279799	0.760862	0.623637	2.73487	0.00839549	0.295747
ENSG00000166394	-1.06365	1.17773	-2.73357	0.00839863	0.295747
ENSG00000181381	-1.22922	4.51353	-2.73501	0.00840205	0.295747
ENSG00000106688	0.502425	4.48835	2.73462	0.00840726	0.295747
ENSG00000152078	-0.618742	4.51539	-2.73413	0.00842027	0.295747
ENSG00000234231	1.05433	-3.37123	2.7342	0.00842134	0.295747
ENSG00000275106	0.850929	-0.353136	2.73242	0.00842433	0.295747
ENSG00000233335	-1.722	-2.41326	-2.73227	0.00842787	0.295747
ENSG00000104267	-0.820976	3.34047	-2.73192	0.00843573	0.295747
ENSG00000110455	0.313247	5.12314	2.73155	0.0084441	0.295747
ENSG00000105146	-0.65535	1.98267	-2.73284	0.00845153	0.295747
ENSG00000122591	0.930526	4.93992	2.72985	0.00851275	0.295747
ENSG00000264069	0.749365	-0.558923	2.73007	0.00851836	0.295747
ENSG00000204666	-1.05664	-0.51878	-2.72818	0.0085203	0.295747
ENSG00000103064	0.342123	5.79016	2.72945	0.00852482	0.295747
ENSG00000140937	0.65229	6.33674	2.72906	0.00853353	0.295747
ENSG00000232517	1.31198	-2.50131	2.72896	0.00853582	0.295747
ENSG00000168539	1.01406	0.334769	2.72691	0.00854916	0.295747
ENSG00000183269	-1.54613	-2.84997	-2.72614	0.00856657	0.295747
ENSG00000141002	-0.345586	7.76641	-2.72674	0.00857955	0.295747
ENSG00000102290	0.832252	5.73733	2.72589	0.00859241	0.295747
ENSG00000151575	-0.39222	3.36058	-2.72635	0.00860305	0.295747
ENSG00000240244	0.889701	2.59185	2.72572	0.00860554	0.295747
ENSG00000263142	-0.961692	0.87088	-2.72418	0.00861151	0.295747
ENSG00000241597	0.599241	1.79577	2.72403	0.00861502	0.295747
ENSG00000114388	-0.367584	4.92666	-2.7238	0.0086203	0.295747
ENSG00000157343	-0.848757	0.0511871	-2.72352	0.00862674	0.295747
ENSG00000254236	1.18451	-2.53279	2.72256	0.00864874	0.295747
ENSG00000132326	-0.451529	5.20981	-2.7233	0.00865379	0.295747
ENSG00000273621	0.720056	-0.0645186	2.72405	0.00865441	0.295747
ENSG00000140807	-0.81643	5.87394	-2.72308	0.00867294	0.295747
ENSG00000278344	1.27343	-2.02628	2.72104	0.0086837	0.295747
ENSG00000216009	0.764589	0.183702	2.72066	0.00869254	0.295747
ENSG00000274776	0.399676	3.27392	2.72168	0.00869334	0.295747
ENSG00000185246	-0.282993	6.6231	-2.72177	0.00869905	0.295747
ENSG00000277978	-1.73039	-2.41815	-2.72075	0.00871487	0.295747
ENSG00000153246	0.744277	6.22292	2.72103	0.00871572	0.295747
ENSG00000249492	0.808248	0.245649	2.71919	0.00872664	0.295747
ENSG00000104059	0.541122	3.97536	2.71952	0.00873991	0.295747
ENSG00000133124	0.634332	3.19444	2.71959	0.00874091	0.295747
ENSG00000187098	0.764967	3.79892	2.71982	0.00874564	0.295747
ENSG00000185015	0.508018	3.5064	2.71974	0.00874829	0.295747
ENSG00000226306	1.25623	-1.05415	2.71873	0.00876133	0.295858
ENSG00000168310	-0.529228	4.7668	-2.71708	0.00880167	0.295957
ENSG00000201570	0.9857	-1.32574	2.71754	0.00880769	0.295957
ENSG00000143067	0.554349	5.27043	2.71666	0.00880919	0.295957
ENSG00000258101	0.586252	1.06711	2.71676	0.00881801	0.295957
ENSG00000263826	0.824915	0.323148	2.7144	0.00883853	0.295957
ENSG00000263120	0.634228	2.63952	2.71574	0.00884222	0.295957
ENSG00000129128	0.454103	5.86315	2.71558	0.00884461	0.295957
ENSG00000166147	-0.668001	8.83685	-2.71543	0.00884744	0.295957
ENSG00000108932	0.60544	3.58531	2.71455	0.008852	0.295957
ENSG00000248749	-1.47844	-3.08019	-2.71252	0.0088827	0.296369
ENSG00000271011	0.733213	-0.207547	2.71247	0.00888384	0.296369
ENSG00000226807	-1.56791	-2.94383	-2.71142	0.00890877	0.296734
ENSG00000236042	-1.47773	-3.08427	-2.71222	0.00891433	0.296734
ENSG00000166763	-1.0683	0.207589	-2.7099	0.00894478	0.297421
ENSG00000233213	0.935034	0.824183	2.71096	0.00895751	0.297519
ENSG00000107554	-0.541661	6.50858	-2.70994	0.00897864	0.297895
ENSG00000267838	0.422266	3.25921	2.70778	0.00899523	0.297901
ENSG00000149480	-0.33647	5.37162	-2.70742	0.00900391	0.297901
ENSG00000275810	0.749329	0.749892	2.70903	0.00900828	0.297901
ENSG00000183439	0.659179	1.46202	2.70835	0.00902021	0.297971
ENSG00000260409	0.907844	1.96259	2.70631	0.00903032	0.297981
ENSG00000118257	-0.568167	6.46021	-2.70671	0.00905533	0.298365
ENSG00000132635	-0.365948	4.81932	-2.70624	0.0090616	0.298365
ENSG00000171813	0.519497	3.76141	2.7021	0.00914976	0.30045
ENSG00000105808	-0.708959	2.54837	-2.70231	0.00916057	0.30045
ENSG00000243792	1.1437	-2.42972	2.70081	0.00916306	0.30045
ENSG00000138083	1.24398	1.27002	2.70075	0.00916454	0.30045
ENSG00000263684	-1.49747	-2.72551	-2.70014	0.00917935	0.300611
ENSG00000146242	0.893641	3.45143	2.7002	0.00921521	0.300896
ENSG00000225968	0.86905	3.09026	2.6996	0.00921906	0.300896
ENSG00000132846	-0.54082	2.82833	-2.69841	0.00922153	0.300896
ENSG00000154079	-0.331499	3.22693	-2.69816	0.00922769	0.300896
ENSG00000121690	-1.22732	0.943119	-2.69861	0.00924386	0.3011
ENSG00000106013	0.503046	3.43059	2.69647	0.00926896	0.301271
ENSG00000101974	0.737809	4.72364	2.69774	0.00926897	0.301271
ENSG00000236809	0.877399	-0.359699	2.69523	0.00929956	0.301942
ENSG00000066926	0.279765	4.99778	2.69619	0.00930978	0.301951
ENSG00000138604	-0.449567	5.31905	-2.69409	0.00932764	0.302207
ENSG00000257359	-1.61961	-2.24036	-2.6921	0.00937672	0.303474
ENSG00000108828	0.503352	5.22856	2.68993	0.00946825	0.30589
ENSG00000087494	0.942983	-0.475023	2.68799	0.00947921	0.30589
ENSG00000102349	0.460488	4.61142	2.68909	0.0094816	0.30589
ENSG00000091128	-1.19344	-0.954308	-2.6883	0.00949936	0.306043
ENSG00000179262	-0.314371	5.3397	-2.68751	0.00950651	0.306043
ENSG00000281468	0.678283	1.02175	2.68702	0.00954425	0.306297
ENSG00000254656	0.837892	2.8296	2.68583	0.00957129	0.306297
ENSG00000276476	1.42141	-2.66288	2.68417	0.00957542	0.306297
ENSG00000112079	0.41143	6.0747	2.68406	0.00957804	0.306297
ENSG00000156232	-0.252491	5.34251	-2.68511	0.00958708	0.306297
ENSG00000223928	0.717388	0.450708	2.68536	0.00958903	0.306297
ENSG00000259953	0.618986	3.46277	2.68457	0.00960101	0.306297
ENSG00000099783	-0.231558	7.0471	-2.68411	0.00960494	0.306297
ENSG00000261468	1.47313	-1.0533	2.68299	0.00960522	0.306297
ENSG00000239697	0.605964	1.58732	2.68236	0.00962124	0.306444
ENSG00000258240	1.01344	-0.997801	2.68366	0.00963001	0.306444
ENSG00000277911	-1.06571	-1.15126	-2.68132	0.00964764	0.30646
ENSG00000267361	0.643311	2.80862	2.68278	0.00965068	0.30646
ENSG00000201247	0.785901	3.2427	2.68056	0.00969637	0.30671
ENSG00000134317	0.521518	4.28997	2.68016	0.00970354	0.30671
ENSG00000022355	0.935346	6.00547	2.68008	0.00970453	0.30671
ENSG00000166822	0.406599	4.20157	2.68028	0.00970576	0.30671
ENSG00000251868	0.914094	-1.23271	2.68045	0.00970909	0.30671
ENSG00000231031	-2.17495	-3.00347	-2.67841	0.00973144	0.307097
ENSG00000261762	-1.60307	0.511331	-2.67792	0.00977887	0.308273
ENSG00000188848	0.529791	3.91313	2.67663	0.00980209	0.308377
ENSG00000117069	0.602546	3.7679	2.67686	0.00980248	0.308377
ENSG00000244045	0.279295	3.59478	2.67551	0.00982668	0.308495
ENSG00000108576	-1.30541	-0.678503	-2.67427	0.00982845	0.308495
ENSG00000219665	0.474203	3.8496	2.67385	0.00983949	0.308495
ENSG00000226025	1.16498	-0.404441	2.67327	0.00985446	0.308495
ENSG00000151240	-0.236448	7.95353	-2.67293	0.00986337	0.308495
ENSG00000105926	0.616428	5.21105	2.6739	0.00987099	0.308495
ENSG00000261019	0.5464	1.01708	2.674	0.00988018	0.308495
ENSG00000197557	0.365394	2.60385	2.67348	0.0098912	0.308495
ENSG00000119614	-1.64124	-3.01827	-2.67118	0.00990875	0.308495
ENSG00000196189	-0.544447	4.84216	-2.672	0.00992098	0.308495
ENSG00000136235	1.44913	1.06009	2.67068	0.00993297	0.308495
ENSG00000187416	0.962337	3.36224	2.67011	0.00994058	0.308495
ENSG00000185630	0.484269	7.63916	2.66971	0.00994729	0.308495
ENSG00000255498	-1.37651	-2.79568	-2.66966	0.0099485	0.308495
ENSG00000253877	-1.57608	-2.46745	-2.66831	0.00998409	0.308887
ENSG00000255621	1.0245	-0.479964	2.66816	0.00998788	0.308887
ENSG00000235907	1.33989	-1.78759	2.66802	0.00999168	0.308887
ENSG00000128610	1.45597	-2.33194	2.66864	0.0100176	0.309375
ENSG00000152253	1.15682	-0.868403	2.66514	0.0100675	0.309946
ENSG00000060140	0.79689	1.32571	2.66608	0.0100826	0.309946
ENSG00000205971	1.32133	-2.46424	2.66436	0.0101075	0.309946
ENSG00000253661	0.570846	2.00286	2.66363	0.0101077	0.309946
ENSG00000206199	-1.41534	-3.02596	-2.66358	0.0101172	0.309946
ENSG00000213950	0.505838	1.41866	2.66491	0.0101178	0.309946
ENSG00000254781	-1.43261	-2.94281	-2.66303	0.0101235	0.309946
ENSG00000163866	0.259374	5.58978	2.66266	0.0101335	0.309946
ENSG00000263666	0.821012	-1.35414	2.66355	0.0101413	0.309946
ENSG00000233184	0.476045	2.61913	2.66218	0.0101463	0.309946
ENSG00000223559	0.929101	-2.11518	2.6621	0.0101484	0.309946
ENSG00000271937	1.03608	-1.54789	2.66232	0.0101831	0.310309
ENSG00000100285	0.915213	6.59347	2.66186	0.0101936	0.310309
ENSG00000279214	1.11607	-2.16342	2.66016	0.0102002	0.310309
ENSG00000113361	1.01737	4.97435	2.66095	0.0102069	0.310309
ENSG00000166949	-1.04906	4.66636	-2.66125	0.0102115	0.310309
ENSG00000205323	-0.431069	2.11148	-2.65866	0.0102405	0.310309
ENSG00000052126	0.433935	8.86535	2.65892	0.010242	0.310309
ENSG00000272092	0.637979	1.6261	2.65996	0.0102421	0.310309
ENSG00000272161	-1.47147	-3.19128	-2.65788	0.0102867	0.311246
ENSG00000254273	0.587005	1.55481	2.65627	0.0103048	0.311246
ENSG00000257557	0.568607	2.74929	2.65575	0.010319	0.311246
ENSG00000158258	0.692611	6.50944	2.65677	0.0103312	0.311246
ENSG00000285694	1.06201	-2.09603	2.65477	0.0103455	0.311246
ENSG00000259565	-1.95091	-2.78397	-2.65581	0.0103499	0.311246
ENSG00000245910	-0.347924	4.01887	-2.6557	0.0103551	0.311246
ENSG00000251697	0.756492	-0.672925	2.65515	0.0103766	0.311246
ENSG00000233665	-1.30813	-0.380975	-2.65452	0.0103784	0.311246
ENSG00000133636	1.63393	0.0260507	2.65497	0.0103819	0.311246
ENSG00000132294	-0.393512	6.42554	-2.65329	0.0103858	0.311246
ENSG00000124782	-1.36059	5.09265	-2.65444	0.0103962	0.31125
ENSG00000184357	-1.9869	-1.70584	-2.65248	0.0104076	0.311285
ENSG00000168734	-0.321285	3.88418	-2.65178	0.0104268	0.311552
ENSG00000163814	0.937588	0.265639	2.65064	0.0104581	0.312179
ENSG00000177076	0.604213	2.69065	2.65102	0.0104755	0.312227
ENSG00000143321	-0.369459	5.49534	-2.6508	0.0104809	0.312227
ENSG00000207148	1.13951	-2.54317	2.65061	0.0105046	0.312227
ENSG00000228113	0.5248	2.28124	2.65044	0.0105065	0.312227
ENSG00000261239	-1.56495	-0.393415	-2.64871	0.0105111	0.312227
ENSG00000157379	-0.361115	4.4494	-2.64802	0.01053	0.312482
ENSG00000099953	0.694278	0.457298	2.64826	0.0105668	0.313269
ENSG00000254648	0.726515	1.13503	2.64703	0.0105951	0.313589
ENSG00000148218	-0.297128	5.63333	-2.6461	0.0105983	0.313589
ENSG00000137460	0.669089	3.91972	2.64607	0.0106157	0.3138
ENSG00000229043	0.408765	2.63224	2.64494	0.0106437	0.31432
ENSG00000253485	-0.476618	3.96125	-2.64398	0.010687	0.315158
ENSG00000111058	0.648315	3.73099	2.64289	0.0107007	0.315158
ENSG00000261002	1.21381	-2.89109	2.64171	0.0107053	0.315158
ENSG00000215004	0.562827	1.42075	2.64308	0.0107136	0.315158
ENSG00000108773	-0.416371	7.25928	-2.64134	0.0107285	0.315293
ENSG00000204174	1.20137	-2.32156	2.63964	0.0107634	0.315754
ENSG00000171561	-1.51411	-3.06025	-2.63929	0.0107733	0.315754
ENSG00000143554	-0.513882	3.86412	-2.64049	0.0107769	0.315754
ENSG00000216817	-1.60866	-2.0378	-2.63855	0.0107941	0.315754
ENSG00000225544	-1.24081	-1.83588	-2.63848	0.0107962	0.315754
ENSG00000200818	-2.07437	0.789848	-2.63844	0.0108425	0.316728
ENSG00000270393	0.789704	-0.0362156	2.63656	0.0108504	0.316728
ENSG00000163632	-1.34598	-2.54743	-2.63596	0.0108675	0.316921
ENSG00000254578	-1.36948	-1.64158	-2.63514	0.0108907	0.317292
ENSG00000163421	1.3336	-1.81048	2.63346	0.0109386	0.318076
ENSG00000165895	0.816281	2.63681	2.63431	0.0109454	0.318076
ENSG00000185304	-0.933008	2.00794	-2.63371	0.0109744	0.318076
ENSG00000241158	-1.60803	-2.37673	-2.6331	0.0109837	0.318076
ENSG00000145113	-1.23243	0.102515	-2.63186	0.0109845	0.318076
ENSG00000267272	0.599946	1.06938	2.6331	0.0109913	0.318076
ENSG00000113441	0.377213	6.85906	2.63201	0.0110225	0.318076
ENSG00000143520	-1.42926	-2.32855	-2.63179	0.0110277	0.318076
ENSG00000251313	1.27903	-2.30822	2.62938	0.0110555	0.318076
ENSG00000227892	-1.78202	-2.85376	-2.63047	0.0110567	0.318076
ENSG00000274620	0.975128	-1.11831	2.63088	0.0110583	0.318076
ENSG00000277586	0.717754	7.57037	2.63038	0.0110629	0.318076
ENSG00000271746	0.637948	0.817161	2.62911	0.0110634	0.318076
ENSG00000197063	0.304227	5.85307	2.62984	0.0110642	0.318076
ENSG00000121904	0.792215	7.3223	2.62901	0.0110941	0.318632
ENSG00000269514	0.409302	3.50228	2.62724	0.0111175	0.319002
ENSG00000231672	0.506821	4.0825	2.62688	0.011128	0.319002
ENSG00000260895	0.565828	0.663718	2.62731	0.0111589	0.319271
ENSG00000285695	0.867802	-0.348386	2.62571	0.0112018	0.319271
ENSG00000144366	-0.952094	6.0408	-2.62539	0.0112059	0.319271
ENSG00000149923	-0.302025	4.19819	-2.62401	0.0112114	0.319271
ENSG00000286063	-1.5068	-1.12963	-2.62482	0.0112252	0.319271
ENSG00000207754	0.92621	-1.33538	2.62315	0.0112366	0.319271
ENSG00000241770	1.07469	-2.11591	2.62312	0.0112373	0.319271
ENSG00000240032	0.833234	-0.0276596	2.62251	0.0112554	0.319271
ENSG00000274428	0.889985	-1.55714	2.62358	0.0112678	0.319271
ENSG00000101220	0.490017	3.25678	2.62328	0.0112719	0.319271
ENSG00000170113	0.344743	5.96788	2.62282	0.0112892	0.319271
ENSG00000253869	-1.7164	-0.283099	-2.62102	0.0112991	0.319271
ENSG00000197299	0.975869	1.31613	2.62169	0.0113004	0.319271
ENSG00000260128	0.934002	-1.9246	2.6225	0.0113017	0.319271
ENSG00000204961	-0.438043	3.83945	-2.62179	0.0113132	0.319271
ENSG00000270673	1.146	-1.25827	2.62176	0.0113175	0.319271
ENSG00000188917	0.334448	4.18853	2.62128	0.011331	0.319271
ENSG00000206129	-1.69651	-0.522713	-2.62035	0.0113631	0.319271
ENSG00000184634	-0.262769	6.40536	-2.61914	0.0113656	0.319271
ENSG00000277632	1.54516	-1.77986	2.61853	0.0113725	0.319271
ENSG00000063438	0.965594	-0.0942502	2.61791	0.0113908	0.319271
ENSG00000232314	0.86994	1.14845	2.61899	0.0113921	0.319271
ENSG00000269303	1.08514	-2.34766	2.6176	0.0114001	0.319271
ENSG00000260093	0.443798	2.82208	2.61741	0.0114342	0.319271
ENSG00000104381	0.250717	6.80647	2.61707	0.0114526	0.319271
ENSG00000234168	0.876014	-1.26021	2.61554	0.0114612	0.319271
ENSG00000121774	-0.190767	5.94476	-2.61553	0.0114616	0.319271
ENSG00000214783	-0.621648	1.15206	-2.61526	0.0114696	0.319271
ENSG00000156103	0.56755	5.97941	2.61566	0.0114743	0.319271
ENSG00000137478	0.374315	6.88466	2.61509	0.0114746	0.319271
ENSG00000272071	0.762207	0.854773	2.61619	0.0114791	0.319271
ENSG00000201816	-1.57779	-3.1509	-2.61608	0.0114843	0.319271
ENSG00000283629	-1.37202	-3.02474	-2.61591	0.0114844	0.319271
ENSG00000174574	0.369979	5.00587	2.61537	0.0115055	0.319539
ENSG00000023909	0.403504	4.00698	2.615	0.0115231	0.319539
ENSG00000221387	-1.37715	-3.15948	-2.61319	0.0115313	0.319539
ENSG00000250878	0.480513	3.53978	2.61356	0.0115384	0.319539
ENSG00000270083	0.862812	0.11919	2.61254	0.011551	0.319539
ENSG00000252516	1.12374	-1.32493	2.61296	0.0115754	0.319539
ENSG00000255468	-0.503541	3.07054	-2.6126	0.011583	0.319539
ENSG00000133083	0.583227	7.19135	2.61243	0.0115911	0.319539
ENSG00000157613	0.731091	2.12304	2.61106	0.0116278	0.319539
ENSG00000046604	0.885946	-0.727191	2.61135	0.0116353	0.319539
ENSG00000168917	0.319397	4.77418	2.60961	0.011639	0.319539
ENSG00000284418	1.10076	-1.59651	2.61107	0.0116427	0.319539
ENSG00000216099	0.976279	-0.389767	2.61074	0.0116452	0.319539
ENSG00000164032	-0.463537	3.78015	-2.60936	0.0116466	0.319539
ENSG00000265485	-1.38788	-2.5325	-2.60919	0.011652	0.319539
ENSG00000105287	-1.02583	2.5694	-2.60848	0.0117001	0.320164
ENSG00000073737	1.29813	-1.10177	2.60887	0.0117065	0.320164
ENSG00000267623	0.906347	0.706929	2.60794	0.0117247	0.320164
ENSG00000242588	-0.405915	4.16972	-2.60677	0.0117254	0.320164
ENSG00000270112	0.460253	2.48267	2.60781	0.0117364	0.320164
ENSG00000158467	0.287924	6.09027	2.60653	0.0117386	0.320164
ENSG00000224988	1.08233	-2.09175	2.60582	0.0117543	0.320164
ENSG00000158458	-0.466008	6.01372	-2.60697	0.0117591	0.320164
ENSG00000124074	-0.545486	2.50553	-2.60504	0.0118179	0.321476
ENSG00000182108	0.291775	5.00583	2.60297	0.0118413	0.321503
ENSG00000166016	-0.764066	3.50798	-2.60269	0.0118499	0.321503
ENSG00000230026	0.600172	1.72702	2.60357	0.0118514	0.321503
ENSG00000259788	1.02755	-0.334732	2.60263	0.0118694	0.321503
ENSG00000173531	-0.765648	2.50576	-2.60198	0.0118718	0.321503
ENSG00000277688	1.07881	-1.48112	2.60279	0.0118952	0.321848
ENSG00000201014	1.00505	-1.37261	2.60183	0.0119173	0.321854
ENSG00000131389	-0.707389	7.14273	-2.60145	0.0119185	0.321854
ENSG00000101445	-0.499091	6.1663	-2.60133	0.0119272	0.321854
ENSG00000152767	0.60509	6.92472	2.60026	0.0119583	0.322158
ENSG00000003249	0.488603	3.48704	2.59947	0.0119641	0.322158
ENSG00000204304	-0.344454	5.26763	-2.59874	0.0119719	0.322158
ENSG00000204246	1.00892	-1.06408	2.59996	0.011981	0.322158
ENSG00000111801	-0.552391	4.27084	-2.59957	0.0119915	0.322158
ENSG00000228395	-0.697727	0.915837	-2.59865	0.0120221	0.322695
ENSG00000260369	0.890318	-0.593808	2.59648	0.012042	0.322917
ENSG00000102030	-0.454881	5.06269	-2.59571	0.0120662	0.322917
ENSG00000258700	0.990129	-1.79046	2.59653	0.0120865	0.322917
ENSG00000164616	-0.902743	2.94269	-2.59537	0.0121262	0.322917
ENSG00000183671	0.990584	-2.84222	2.5933	0.0121416	0.322917
ENSG00000185607	-0.590632	3.84343	-2.59459	0.012145	0.322917
ENSG00000070915	0.644926	2.8899	2.59317	0.0121455	0.322917
ENSG00000285876	-1.22557	-2.78621	-2.59376	0.0121507	0.322917
ENSG00000237001	-1.43576	-2.96524	-2.59276	0.0121586	0.322917
ENSG00000241233	-1.0861	-0.418709	-2.59374	0.0121586	0.322917
ENSG00000260784	-1.39378	-1.6777	-2.59361	0.0121716	0.322917
ENSG00000148832	-0.537075	2.32742	-2.59216	0.0121773	0.322917
ENSG00000278266	0.73508	0.806468	2.59346	0.0121825	0.322917
ENSG00000243915	0.41304	4.05437	2.59226	0.0121869	0.322917
ENSG00000187537	-1.71829	-3.05087	-2.5925	0.0121906	0.322917
ENSG00000114480	0.633079	4.88404	2.59272	0.0122006	0.322917
ENSG00000128652	-1.3882	-2.64755	-2.59085	0.0122187	0.323116
ENSG00000182054	-0.397897	4.19187	-2.59	0.0122457	0.323547
ENSG00000196782	-0.577069	4.80906	-2.59008	0.0122699	0.323904
ENSG00000151229	0.539814	6.44052	2.58765	0.0123203	0.324951
ENSG00000260898	0.877188	-0.572586	2.58728	0.0123319	0.324976
ENSG00000170743	-0.529668	5.81619	-2.58699	0.0123753	0.325749
ENSG00000108387	-0.509551	7.16366	-2.58569	0.0123827	0.325749
ENSG00000168763	-0.286139	4.81388	-2.58572	0.0124277	0.326402
ENSG00000270761	0.747944	-0.687293	2.5855	0.0124386	0.326402
ENSG00000263883	-0.381874	3.35792	-2.58455	0.0124645	0.326402
ENSG00000180660	-1.03886	2.82445	-2.58458	0.0124678	0.326402
ENSG00000223117	1.06734	-2.07654	2.58403	0.0124808	0.326402
ENSG00000140350	-0.397822	5.67526	-2.58341	0.0124891	0.326402
ENSG00000260658	1.06032	0.477758	2.58378	0.0124906	0.326402
ENSG00000141349	0.324851	3.78575	2.58372	0.0124935	0.326402
ENSG00000253137	0.805118	2.57206	2.5812	0.0125268	0.326728
ENSG00000231134	-1.70439	-2.23626	-2.58237	0.0125276	0.326728
ENSG00000146678	1.06902	-2.61257	2.58197	0.0125479	0.326978
ENSG00000219928	0.900348	-0.560332	2.57928	0.0125891	0.327228
ENSG00000279968	0.872147	-0.3966	2.58027	0.0126051	0.327228
ENSG00000239887	0.593375	3.21953	2.57877	0.0126055	0.327228
ENSG00000276213	1.1773	-2.01543	2.57866	0.0126091	0.327228
ENSG00000264739	1.12665	-1.19337	2.57891	0.0126277	0.327228
ENSG00000185950	0.481309	5.62985	2.57899	0.0126329	0.327228
ENSG00000187185	-1.29126	-2.43591	-2.57876	0.0126488	0.327228
ENSG00000263631	1.09237	-2.46347	2.57688	0.012667	0.327228
ENSG00000101197	1.39305	-3.53597	2.57672	0.0126724	0.327228
ENSG00000182324	0.470805	2.1374	2.57658	0.0126769	0.327228
ENSG00000277634	-1.20551	-2.30129	-2.57657	0.0126773	0.327228
ENSG00000177112	0.794909	1.06419	2.5771	0.0126869	0.327228
ENSG00000139289	0.530867	4.98918	2.57552	0.0127374	0.328252
ENSG00000101311	0.957941	3.31962	2.57421	0.0127845	0.328772
ENSG00000269058	0.941989	-1.79696	2.57445	0.0127923	0.328772
ENSG00000175518	-1.41003	-0.133571	-2.57304	0.012793	0.328772
ENSG00000136940	-0.275337	4.30865	-2.57344	0.0128008	0.328772
ENSG00000248464	1.20668	-2.62502	2.57232	0.0128168	0.328824
ENSG00000206899	0.846882	2.27018	2.573	0.0128246	0.328824
ENSG00000261146	-1.64612	2.61117	-2.57298	0.0128449	0.329067
ENSG00000215162	-1.41875	-2.47641	-2.57082	0.012898	0.330149
ENSG00000186376	0.271759	4.73683	2.56837	0.0129476	0.330218
ENSG00000228824	0.672008	2.24535	2.56749	0.0129771	0.330218
ENSG00000049656	0.409699	5.50944	2.56846	0.0129778	0.330218
ENSG00000240207	0.454422	5.02839	2.56854	0.0129837	0.330218
ENSG00000165731	0.91744	5.21092	2.56787	0.0130061	0.330218
ENSG00000083123	0.377763	4.29175	2.5665	0.01301	0.330218
ENSG00000274797	1.04824	-1.65425	2.56573	0.0130359	0.330218
ENSG00000271797	1.20841	-1.7654	2.56562	0.0130396	0.330218
ENSG00000275322	-1.64288	0.0457998	-2.56692	0.0130413	0.330218
ENSG00000226318	0.4184	3.04149	2.56524	0.0130523	0.330218
ENSG00000113504	1.138	3.34716	2.56532	0.0130686	0.330218
ENSG00000168090	-0.259495	5.33708	-2.56422	0.0130863	0.330218
ENSG00000244313	-0.594461	1.29321	-2.56503	0.0131007	0.330218
ENSG00000203876	0.471903	2.65514	2.56379	0.0131009	0.330218
ENSG00000138413	0.266617	4.95924	2.56465	0.0131112	0.330218
ENSG00000263934	0.710322	9.78082	2.56344	0.0131128	0.330218
ENSG00000181982	-0.275536	6.44334	-2.56448	0.0131145	0.330218
ENSG00000170482	-1.25623	-2.52039	-2.56418	0.0131273	0.330218
ENSG00000241947	-1.37223	-1.26337	-2.56339	0.0131344	0.330218
ENSG00000176490	0.572419	4.06536	2.5641	0.0131367	0.330218
ENSG00000155158	0.339591	6.47291	2.56355	0.0131514	0.330218
ENSG00000274444	-1.54663	0.0554366	-2.5632	0.0131561	0.330218
ENSG00000183779	1.1538	1.30853	2.56274	0.0131779	0.330218
ENSG00000207275	0.723336	-0.156077	2.56129	0.0131854	0.330218
ENSG00000243566	-1.27789	2.23583	-2.56232	0.0131961	0.330218
ENSG00000272566	-1.39196	-1.97897	-2.56217	0.0132016	0.330218
ENSG00000231948	-0.808745	0.355412	-2.56051	0.0132119	0.330218
ENSG00000049541	-0.473655	2.28544	-2.56048	0.0132128	0.330218
ENSG00000082397	-0.319949	8.75322	-2.56136	0.0132161	0.330218
ENSG00000066027	-0.610321	3.70452	-2.56037	0.0132621	0.330775
ENSG00000226443	0.786362	0.925868	2.55881	0.0132694	0.330775
ENSG00000161914	-0.389838	3.25467	-2.55942	0.0132934	0.330775
ENSG00000154832	-0.494167	6.07131	-2.5581	0.0132937	0.330775
ENSG00000232954	-2.2102	-1.46825	-2.5592	0.0133006	0.330775
ENSG00000069018	-0.967487	3.49711	-2.55911	0.0133087	0.330775
ENSG00000280109	-1.85399	-1.61303	-2.55739	0.013318	0.330775
ENSG00000259291	-0.485572	2.8808	-2.55796	0.0133256	0.330775
ENSG00000181234	0.701699	4.65321	2.55787	0.0133405	0.330876
ENSG00000184068	0.460946	0.784561	2.55612	0.0133611	0.331116
ENSG00000274898	1.06403	-2.0178	2.55541	0.0133856	0.331257
ENSG00000135324	0.598285	3.42478	2.55476	0.0134079	0.331257
ENSG00000233329	0.722776	-0.306531	2.55583	0.013421	0.331257
ENSG00000133687	0.450465	6.2203	2.55476	0.0134259	0.331257
ENSG00000204758	0.438842	0.63361	2.55401	0.0134339	0.331257
ENSG00000067836	-0.460722	5.38424	-2.5546	0.0134395	0.331257
ENSG00000137070	-0.526418	5.0363	-2.55419	0.0134503	0.331257
ENSG00000175224	-0.256686	5.63951	-2.55292	0.0134714	0.331257
ENSG00000080007	-0.808139	1.65464	-2.55401	0.0134864	0.331257
ENSG00000226427	-1.4186	-1.61247	-2.55221	0.013496	0.331257
ENSG00000105499	-0.301204	6.78348	-2.55351	0.0134972	0.331257
ENSG00000113430	-1.58288	-3.29171	-2.55184	0.0135085	0.331257
ENSG00000263693	0.99236	-1.14554	2.55295	0.0135185	0.331257
ENSG00000244232	0.943017	-0.445543	2.55256	0.0135297	0.331257
ENSG00000144645	0.612475	4.96936	2.55239	0.0135305	0.331257
ENSG00000259262	1.02747	-1.24182	2.55072	0.0135473	0.331389
ENSG00000196793	0.386976	3.53267	2.55105	0.0135577	0.331389
ENSG00000167077	-0.990139	3.13959	-2.55024	0.013614	0.332496
ENSG00000065882	-0.531753	5.76115	-2.54965	0.013631	0.332644
ENSG00000187258	-1.69686	2.22287	-2.54906	0.0136554	0.332783
ENSG00000272735	0.79451	-0.244201	2.54753	0.0136586	0.332783
ENSG00000241136	-1.56933	-3.42895	-2.54651	0.013694	0.333177
ENSG00000187950	0.569732	3.00539	2.5463	0.0137015	0.333177
ENSG00000122786	-0.57401	7.65336	-2.54665	0.0137077	0.333177
ENSG00000277157	-1.34775	-0.745293	-2.5456	0.0137261	0.333358
ENSG00000269927	1.07176	-2.4269	2.54471	0.0137573	0.333686
ENSG00000272948	1.04983	-0.235546	2.54562	0.0137616	0.333686
ENSG00000136243	0.307913	4.88956	2.54414	0.0137773	0.333799
ENSG00000251445	1.028	-2.67247	2.5437	0.0137929	0.333912
ENSG00000235162	0.615809	1.76954	2.54424	0.0138253	0.334242
ENSG00000213614	0.216662	6.37001	2.54269	0.0138286	0.334242
ENSG00000134115	0.589315	4.67159	2.54307	0.0138577	0.334275
ENSG00000259802	0.663981	1.1226	2.54132	0.0138772	0.334275
ENSG00000143816	0.881066	1.42261	2.54224	0.0138885	0.334275
ENSG00000197872	-0.429647	5.95801	-2.54191	0.0138954	0.334275
ENSG00000100395	-0.338086	5.77369	-2.54074	0.0138977	0.334275
ENSG00000132429	0.591773	1.89524	2.54184	0.0139074	0.334275
ENSG00000269837	0.372225	4.38527	2.54126	0.0139076	0.334275
ENSG00000280266	-1.39919	-3.07294	-2.54086	0.0139191	0.334275
ENSG00000177182	0.48236	4.72136	2.54105	0.013929	0.334275
ENSG00000235051	-0.655347	2.19844	-2.53938	0.0139978	0.335627
ENSG00000201441	0.89064	-1.76805	2.53831	0.0140348	0.335627
ENSG00000249773	-1.18793	-1.80312	-2.53663	0.0140444	0.335627
ENSG00000104973	-0.306345	5.81887	-2.53733	0.0140486	0.335627
ENSG00000264104	-1.6686	-2.74138	-2.53644	0.014051	0.335627
ENSG00000208004	0.866597	-0.728319	2.53762	0.0140622	0.335627
ENSG00000117262	0.361264	3.47463	2.53754	0.0140628	0.335627
ENSG00000199570	1.01174	-2.05686	2.53516	0.0140969	0.335708
ENSG00000278012	0.676555	-0.346345	2.53607	0.0141171	0.335708
ENSG00000214223	-0.980256	-0.501054	-2.53446	0.0141221	0.335708
ENSG00000144445	0.464313	5.32078	2.53465	0.0141243	0.335708
ENSG00000255293	-1.0957	-1.29938	-2.53419	0.0141319	0.335708
ENSG00000103197	-0.346109	7.54419	-2.53476	0.0141325	0.335708
ENSG00000213963	0.368863	3.9352	2.53293	0.0141774	0.335856
ENSG00000233836	-0.620074	4.01232	-2.53425	0.014181	0.335856
ENSG00000163701	-0.942075	0.541241	-2.53283	0.0141811	0.335856
ENSG00000200879	0.715321	2.48759	2.53375	0.014183	0.335856
ENSG00000125834	-0.43164	5.32985	-2.53213	0.0142063	0.336145
ENSG00000276023	0.439645	1.50317	2.53279	0.0142357	0.336579
ENSG00000273679	1.07606	-1.67441	2.53066	0.0142598	0.336886
ENSG00000286067	-1.07339	-1.44589	-2.53014	0.0142784	0.337025
ENSG00000279954	-0.817856	2.78129	-2.53094	0.0142955	0.337025
ENSG00000285587	0.734697	0.199486	2.5308	0.014299	0.337025
ENSG00000257025	0.788557	-0.547305	2.53037	0.014317	0.337094
ENSG00000103876	0.500766	3.01272	2.52975	0.0143287	0.337094
ENSG00000230432	-1.32211	-2.51755	-2.52859	0.0143352	0.337094
ENSG00000229931	-0.513039	1.7959	-2.52944	0.014353	0.337252
ENSG00000189196	0.95308	-1.03221	2.52671	0.014404	0.338187
ENSG00000253390	1.15584	-2.57799	2.52707	0.0144389	0.338437
ENSG00000162852	0.263754	5.23185	2.5266	0.0144422	0.338437
ENSG00000286071	-1.48697	-0.247269	-2.52601	0.0144557	0.338437
ENSG00000250579	-1.68177	-3.27404	-2.5252	0.0144592	0.338437
ENSG00000272329	1.0152	-2.14563	2.52543	0.0145052	0.338528
ENSG00000201482	0.946862	2.79063	2.52503	0.0145099	0.338528
ENSG00000230316	1.26975	0.0166294	2.52478	0.0145179	0.338528
ENSG00000230783	-0.626788	0.564444	-2.52471	0.0145301	0.338528
ENSG00000203709	0.28953	9.07039	2.52281	0.0145475	0.338528
ENSG00000223735	-1.50377	-2.94106	-2.52258	0.014556	0.338528
ENSG00000183379	-1.0976	4.92833	-2.52386	0.0145567	0.338528
ENSG00000228956	0.537481	1.66084	2.52226	0.0145678	0.338528
ENSG00000240412	0.502094	2.03084	2.5222	0.0145699	0.338528
ENSG00000213078	-1.37586	-1.67348	-2.52332	0.0145746	0.338528
ENSG00000215349	-1.16698	-2.44377	-2.52112	0.0146101	0.338593
ENSG00000174243	-0.232656	6.20163	-2.52101	0.0146141	0.338593
ENSG00000105618	-0.344673	5.86605	-2.52138	0.0146158	0.338593
ENSG00000141431	0.299098	6.12962	2.5208	0.014622	0.338593
ENSG00000223770	-1.53821	0.159066	-2.52032	0.0146925	0.339526
ENSG00000180592	0.511693	1.63616	2.51842	0.0147109	0.339526
ENSG00000107537	0.356262	3.09569	2.51969	0.014712	0.339526
ENSG00000137038	0.341298	3.20869	2.51968	0.0147136	0.339526
ENSG00000101188	0.970182	3.17195	2.51822	0.0147183	0.339526
ENSG00000250208	1.23476	-0.322831	2.51721	0.0147559	0.340043
ENSG00000134871	-0.773511	6.40782	-2.51809	0.0147662	0.340043
ENSG00000132958	-0.944834	-0.486626	-2.51778	0.014785	0.340043
ENSG00000136261	-0.400102	4.36178	-2.51643	0.0147854	0.340043
ENSG00000223776	0.881197	-0.376795	2.51637	0.014833	0.340259
ENSG00000160917	-0.47345	5.51691	-2.51452	0.0148571	0.340259
ENSG00000223935	0.445651	1.84914	2.51371	0.0148878	0.340259
ENSG00000185499	-1.27763	-0.128518	-2.51425	0.0148922	0.340259
ENSG00000270317	1.0154	-2.44706	2.5134	0.0148994	0.340259
ENSG00000253516	-0.55945	3.13791	-2.51448	0.0149124	0.340259
ENSG00000235605	1.09182	-3.07591	2.51329	0.0149216	0.340259
ENSG00000179388	1.19828	0.533261	2.51276	0.0149236	0.340259
ENSG00000178498	-0.391366	5.80537	-2.51311	0.0149239	0.340259
ENSG00000257083	0.579487	2.41345	2.51272	0.0149253	0.340259
ENSG00000227201	1.41965	-1.72004	2.51262	0.014929	0.340259
ENSG00000253873	-0.40037	4.14433	-2.51395	0.0149293	0.340259
ENSG00000175634	-0.358042	5.19166	-2.51205	0.0149506	0.340437
ENSG00000187398	0.791697	5.4097	2.51239	0.0149638	0.340437
ENSG00000229321	0.501437	3.31157	2.51248	0.0149745	0.340437
ENSG00000182389	0.388687	7.68304	2.51113	0.0149854	0.340437
ENSG00000231663	0.661316	0.0585973	2.51212	0.014997	0.340437
ENSG00000211875	-1.37992	-2.11347	-2.5102	0.0150208	0.340437
ENSG00000160233	0.663189	2.3961	2.50995	0.0150303	0.340437
ENSG00000148053	0.487327	7.52099	2.51093	0.0150353	0.340437
ENSG00000101605	0.503679	4.81885	2.50999	0.0150398	0.340437
ENSG00000108963	-0.4376	5.68225	-2.50941	0.0150509	0.340437
ENSG00000253047	-1.40058	-0.611407	-2.50982	0.0150605	0.340437
ENSG00000185670	0.43449	2.21952	2.50771	0.0151533	0.342279
ENSG00000258524	-0.748058	1.25806	-2.50615	0.0151758	0.342415
ENSG00000171824	-0.366252	7.68861	-2.50726	0.0151819	0.342415
ENSG00000279586	-0.825618	4.42034	-2.50611	0.0152283	0.342555
ENSG00000267414	0.768753	-0.326286	2.50602	0.01523	0.342555
ENSG00000144031	-1.244	-1.17862	-2.50509	0.0152305	0.342555
ENSG00000126012	-0.268197	7.38035	-2.50607	0.0152332	0.342555
ENSG00000169905	0.228751	6.66373	2.50399	0.0152593	0.342816
ENSG00000213625	0.429633	4.29085	2.50428	0.0152891	0.342816
ENSG00000170624	0.762755	4.42634	2.50405	0.0152894	0.342816
ENSG00000138039	1.58027	-0.563089	2.50396	0.01529	0.342816
ENSG00000174080	-0.321189	5.87099	-2.50235	0.0153226	0.343035
ENSG00000226235	1.05402	-2.6345	2.50216	0.0153301	0.343035
ENSG00000249150	0.827467	-1.03706	2.50206	0.0153336	0.343035
ENSG00000185739	-1.394	-1.04532	-2.50095	0.0153767	0.343124
ENSG00000113645	0.566315	4.41274	2.50198	0.0153777	0.343124
ENSG00000130612	0.496557	3.12659	2.50204	0.0153825	0.343124
ENSG00000258702	0.546314	3.30952	2.5008	0.0153828	0.343124
ENSG00000081853	-0.418595	3.7513	-2.50127	0.0154176	0.343385
ENSG00000277661	-1.51324	-2.71747	-2.49983	0.0154205	0.343385
ENSG00000178971	-0.422452	6.11609	-2.49923	0.0154438	0.343385
ENSG00000159588	-0.685058	1.73419	-2.49975	0.0154568	0.343385
ENSG00000166341	-0.502156	6.13735	-2.49957	0.0154578	0.343385
ENSG00000088970	-0.409219	7.29494	-2.5	0.0154624	0.343385
ENSG00000139343	-0.460324	3.29509	-2.49798	0.0154928	0.343482
ENSG00000185149	0.925643	-1.61897	2.49908	0.0155007	0.343482
ENSG00000103528	0.85613	3.88309	2.49847	0.0155007	0.343482
ENSG00000259807	-1.19764	0.312528	-2.49685	0.0155373	0.344042
ENSG00000196576	-0.371095	6.87071	-2.49617	0.0155637	0.344376
ENSG00000181072	-0.742473	6.32126	-2.49654	0.0155927	0.344495
ENSG00000233491	-1.63614	-2.55396	-2.49533	0.0155969	0.344495
ENSG00000217325	0.974456	-1.25157	2.49505	0.015608	0.344495
ENSG00000100416	-0.30129	6.28426	-2.49489	0.0156145	0.344495
ENSG00000284976	-0.469724	3.05633	-2.49372	0.0156797	0.345444
ENSG00000201209	0.975566	-1.40371	2.4928	0.0156969	0.345444
ENSG00000235335	0.984567	-1.84302	2.49267	0.0157023	0.345444
ENSG00000212402	0.622491	5.42734	2.49323	0.0157174	0.345444
ENSG00000259271	1.02138	-1.99724	2.49223	0.0157195	0.345444
ENSG00000073792	0.98049	1.56371	2.49266	0.0157289	0.345444
ENSG00000285373	1.1062	-2.04255	2.49179	0.0157372	0.345444
ENSG00000212747	0.455407	1.67456	2.49164	0.0157966	0.345918
ENSG00000268575	0.444146	3.30566	2.49023	0.0157992	0.345918
ENSG00000101463	-0.508844	4.23316	-2.48992	0.0158116	0.345918
ENSG00000221813	-1.42114	-3.21691	-2.48988	0.0158133	0.345918
ENSG00000130640	-0.277988	6.44807	-2.48901	0.0158477	0.345918
ENSG00000203942	-1.38858	-0.754879	-2.48891	0.0158519	0.345918
ENSG00000065268	-0.467355	4.00164	-2.48941	0.0158563	0.345918
ENSG00000135835	-0.783161	3.30707	-2.48948	0.0158627	0.345918
ENSG00000247213	-1.31008	-1.88664	-2.48854	0.0158665	0.345918
ENSG00000165487	-0.296875	5.69057	-2.48923	0.0158763	0.345918
ENSG00000075711	-0.343173	7.49537	-2.48887	0.0158949	0.345918
ENSG00000044574	0.628894	6.51241	2.48847	0.0159076	0.345918
ENSG00000197171	-1.61216	-1.05337	-2.48855	0.0159211	0.345918
ENSG00000073712	-0.405035	4.89958	-2.4872	0.0159381	0.345918
ENSG00000267524	0.659491	1.27407	2.488	0.015941	0.345918
ENSG00000248794	0.530662	0.643098	2.48666	0.0159419	0.345918
ENSG00000136535	-1.75264	-0.436713	-2.48712	0.0159649	0.345918
ENSG00000286085	-1.07456	-0.0748899	-2.48712	0.0159771	0.345918
ENSG00000111886	-1.38661	1.67712	-2.4867	0.0159925	0.345918
ENSG00000278233	1.14113	-0.195352	2.48487	0.0160143	0.345918
ENSG00000145681	0.981125	-0.338803	2.48596	0.0160267	0.345918
ENSG00000128594	0.356734	4.53806	2.48534	0.016028	0.345918
ENSG00000179477	-1.08204	1.60651	-2.4853	0.0160374	0.345918
ENSG00000117395	-0.250697	4.79386	-2.48424	0.0160397	0.345918
ENSG00000269189	0.860885	0.660019	2.48544	0.0160436	0.345918
ENSG00000268555	0.827427	-0.18962	2.48453	0.0160611	0.346019
ENSG00000226031	1.08586	-0.386451	2.48346	0.0160711	0.346019
ENSG00000248127	1.08079	-1.94563	2.48296	0.0160913	0.346207
ENSG00000132972	-1.40585	0.130011	-2.48169	0.0161429	0.347072
ENSG00000133138	0.469401	2.3081	2.48185	0.0161712	0.347291
ENSG00000108465	-0.441104	4.91951	-2.48072	0.0161824	0.347291
ENSG00000286066	1.12181	-2.63669	2.48176	0.0161874	0.347291
ENSG00000199200	1.21271	-2.69734	2.48016	0.0162052	0.347429
ENSG00000283575	0.959837	1.60709	2.48046	0.0162364	0.347774
ENSG00000215397	0.842371	0.303667	2.48	0.0162443	0.347774
ENSG00000106404	-0.878618	2.14338	-2.47986	0.0162647	0.347967
ENSG00000267119	1.03255	-2.14784	2.47838	0.016278	0.348005
ENSG00000128917	-0.81899	2.23574	-2.47726	0.016324	0.348496
ENSG00000069275	-0.29925	6.68808	-2.47697	0.0163359	0.348496
ENSG00000105514	0.339927	4.3651	2.47694	0.0163369	0.348496
ENSG00000202058	0.808631	5.65241	2.47778	0.0163497	0.348496
ENSG00000245330	0.795421	-1.49462	2.47639	0.0163596	0.348496
ENSG00000124678	-1.0398	-0.908932	-2.47614	0.0163698	0.348496
ENSG00000141441	-0.441257	5.70106	-2.47583	0.016426	0.349135
ENSG00000154134	-0.524813	4.04525	-2.47446	0.0164392	0.349135
ENSG00000140961	-0.774884	1.35239	-2.4729	0.0165038	0.349135
ENSG00000278966	0.914186	-1.089	2.47393	0.0165056	0.349135
ENSG00000078177	-0.571075	6.54788	-2.47382	0.0165187	0.349135
ENSG00000278530	-1.1888	-0.820098	-2.47248	0.0165212	0.349135
ENSG00000185477	0.482075	6.0742	2.47196	0.0165429	0.349135
ENSG00000207005	0.927525	-0.52645	2.47179	0.01655	0.349135
ENSG00000205363	0.475906	5.72058	2.47114	0.0165767	0.349135
ENSG00000230873	-1.40553	-3.17711	-2.4707	0.0165951	0.349135
ENSG00000196335	-0.661757	2.83001	-2.47196	0.0165965	0.349135
ENSG00000132670	-0.238079	7.28155	-2.47065	0.0165975	0.349135
ENSG00000185551	-1.26526	5.35015	-2.47188	0.0165987	0.349135
ENSG00000233672	0.95184	-0.0294084	2.47186	0.0166019	0.349135
ENSG00000238142	0.646852	0.183409	2.47156	0.0166034	0.349135
ENSG00000130224	-0.344227	5.91598	-2.47157	0.0166099	0.349135
ENSG00000129071	-0.383123	5.30074	-2.47105	0.0166275	0.349135
ENSG00000121281	0.832888	4.41055	2.46997	0.0166374	0.349135
ENSG00000266502	0.925487	-2.6431	2.47081	0.0166379	0.349135
ENSG00000108349	-0.328937	7.82923	-2.47049	0.0166382	0.349135
ENSG00000163159	-0.270068	3.74726	-2.46959	0.0166414	0.349135
ENSG00000079805	-0.314359	7.46606	-2.46935	0.0166616	0.349319
ENSG00000220340	-1.54049	-3.28752	-2.46921	0.0166927	0.349729
ENSG00000273293	-1.28636	-2.23494	-2.46806	0.0167054	0.349754
ENSG00000227634	1.25435	-2.81939	2.46868	0.0167269	0.349783
ENSG00000238197	-0.353562	3.80567	-2.46747	0.0167303	0.349783
ENSG00000224281	0.413042	1.43069	2.46704	0.0167483	0.349783
ENSG00000120594	0.405321	6.54527	2.467	0.016765	0.349783
ENSG00000263389	1.05147	-2.72497	2.46751	0.0167713	0.349783
ENSG00000183154	0.734213	-0.869312	2.46773	0.0167778	0.349783
ENSG00000084112	0.283143	6.52834	2.46687	0.0167921	0.349783
ENSG00000267659	1.1414	-0.781917	2.46557	0.0168102	0.349783
ENSG00000254416	-1.78996	-2.42098	-2.46669	0.0168105	0.349783
ENSG00000103351	-0.339575	6.41861	-2.46603	0.01684	0.349991
ENSG00000153814	0.293369	4.31029	2.46561	0.0168436	0.349991
ENSG00000279207	0.404224	3.40165	2.46564	0.0168637	0.350169
ENSG00000243384	1.16005	-0.586251	2.46374	0.0168877	0.350429
ENSG00000010818	-0.385797	8.05197	-2.46299	0.0169501	0.351244
ENSG00000174231	-0.264425	7.65449	-2.46227	0.0169501	0.351244
ENSG00000120055	0.905978	-1.19041	2.46125	0.0169932	0.351328
ENSG00000213983	-0.670375	7.33254	-2.46128	0.0170104	0.351328
ENSG00000247271	0.562228	1.81422	2.46057	0.0170223	0.351328
ENSG00000276168	0.716843	11.0812	2.46123	0.0170232	0.351328
ENSG00000258408	-1.52225	-1.0764	-2.46164	0.0170283	0.351328
ENSG00000175048	-0.474546	6.15314	-2.46143	0.0170311	0.351328
ENSG00000243560	-1.40014	-2.16959	-2.46026	0.0170356	0.351328
ENSG00000143297	-1.85011	-2.70321	-2.45982	0.0170544	0.351328
ENSG00000047621	0.293927	4.77472	2.45947	0.0170691	0.351328
ENSG00000228809	1.08189	-2.86018	2.45926	0.0170784	0.351328
ENSG00000203761	-0.630103	3.19847	-2.45918	0.0170815	0.351328
ENSG00000253633	-1.27042	-1.12407	-2.45934	0.0171193	0.351866
ENSG00000269891	0.736222	2.52965	2.45796	0.0171339	0.351929
ENSG00000185666	-0.647456	6.61864	-2.45815	0.0171561	0.352147
ENSG00000268573	0.318234	3.24163	2.45676	0.0171854	0.352152
ENSG00000166402	0.396188	7.36799	2.45644	0.0171993	0.352152
ENSG00000278048	1.23527	-3.03786	2.45642	0.0171999	0.352152
ENSG00000254647	1.21963	-2.55809	2.45597	0.0172197	0.352152
ENSG00000173540	-0.273397	4.19536	-2.45581	0.0172265	0.352152
ENSG00000248625	-1.26113	-2.4588	-2.45557	0.0172366	0.352152
ENSG00000245694	-0.469177	3.63021	-2.45643	0.0172502	0.352152
ENSG00000111358	0.249841	4.34585	2.45553	0.0172563	0.352152
ENSG00000148824	-0.380329	4.90721	-2.45557	0.0172677	0.352152
ENSG00000280721	1.07612	-3.04306	2.45453	0.0172815	0.352152
ENSG00000260101	0.884679	-1.124	2.45422	0.017295	0.352152
ENSG00000178404	-0.580053	5.45625	-2.45529	0.0172957	0.352152
ENSG00000201317	1.11481	-2.72851	2.45398	0.0173183	0.352152
ENSG00000155974	0.496716	5.74077	2.45397	0.0173318	0.352152
ENSG00000187123	-1.03563	4.21539	-2.45449	0.0173403	0.352152
ENSG00000258940	0.975639	-1.2864	2.45371	0.0173706	0.352152
ENSG00000285882	0.789931	0.851116	2.45353	0.0173739	0.352152
ENSG00000228222	0.634281	4.02478	2.45276	0.0173819	0.352152
ENSG00000166833	-0.328973	8.66878	-2.45335	0.0173841	0.352152
ENSG00000233560	-0.565355	2.61669	-2.45276	0.0173933	0.352152
ENSG00000177707	0.740446	3.9861	2.45239	0.0174135	0.352152
ENSG00000138399	0.310788	5.84186	2.45179	0.0174293	0.352152
ENSG00000198947	0.445856	8.22432	2.45103	0.0174336	0.352152
ENSG00000066248	-0.875284	4.64773	-2.45077	0.0174772	0.352152
ENSG00000233730	0.762583	-1.04079	2.45	0.0174783	0.352152
ENSG00000081803	0.927564	5.52667	2.44987	0.0174842	0.352152
ENSG00000204131	0.321223	5.328	2.45018	0.0174916	0.352152
ENSG00000236153	1.18498	-1.59971	2.44909	0.0175183	0.352152
ENSG00000255396	0.404048	2.66807	2.44893	0.0175251	0.352152
ENSG00000242242	0.744599	-0.172015	2.44997	0.0175371	0.352152
ENSG00000157353	-0.336106	4.47755	-2.44912	0.0175424	0.352152
ENSG00000261889	1.17016	-1.21408	2.44959	0.0175553	0.352152
ENSG00000274964	0.399918	2.68	2.44943	0.0175572	0.352152
ENSG00000240038	0.415917	6.77639	2.44797	0.0175671	0.352152
ENSG00000074527	0.871441	2.54655	2.44857	0.0175782	0.352152
ENSG00000231817	-1.59476	-2.24402	-2.44756	0.0175851	0.352152
ENSG00000230952	-1.79633	-2.0223	-2.44756	0.0176046	0.352152
ENSG00000207978	0.862574	-0.58806	2.44697	0.017611	0.352152
ENSG00000135838	0.671436	5.39371	2.44645	0.017634	0.352152
ENSG00000229727	-0.680999	2.38487	-2.44741	0.0176426	0.352152
ENSG00000127995	-0.259771	5.91681	-2.44615	0.0176474	0.352152
ENSG00000248399	-0.913228	-0.196366	-2.44658	0.0176558	0.352152
ENSG00000172732	-0.297318	4.69992	-2.44603	0.0176822	0.352152
ENSG00000224707	0.571602	0.878199	2.44598	0.0177127	0.352152
ENSG00000196141	0.288901	5.96669	2.44496	0.0177138	0.352152
ENSG00000135823	-0.279011	5.5647	-2.4454	0.0177269	0.352152
ENSG00000165646	1.31348	4.09267	2.44519	0.0177274	0.352152
ENSG00000164684	-0.333284	6.93369	-2.44535	0.0177295	0.352152
ENSG00000111834	-0.641473	2.75417	-2.44397	0.0177436	0.352152
ENSG00000227268	0.51929	1.2899	2.44362	0.0177589	0.352152
ENSG00000197584	0.687308	2.57688	2.44442	0.0177714	0.352152
ENSG00000183208	0.419813	2.72327	2.44437	0.0177748	0.352152
ENSG00000267751	1.3199	-1.99034	2.44408	0.0177885	0.352152
ENSG00000198752	-0.211846	8.2486	-2.44361	0.017789	0.352152
ENSG00000170037	-0.404259	5.43578	-2.44359	0.0177976	0.352152
ENSG00000170542	0.590132	4.60837	2.44371	0.0178059	0.352152
ENSG00000254821	0.702221	-0.442035	2.44198	0.0178321	0.352439
ENSG00000257261	0.457733	2.28978	2.44135	0.0178601	0.352763
ENSG00000173068	0.960321	3.56225	2.44098	0.017909	0.353393
ENSG00000259848	-1.45078	-1.65231	-2.4399	0.0179243	0.353393
ENSG00000196391	0.258616	5.37004	2.43979	0.0179293	0.353393
ENSG00000271643	0.843752	1.4693	2.44052	0.0179386	0.353393
ENSG00000224863	-1.22009	0.801183	-2.43953	0.0179923	0.35407
ENSG00000129484	-0.535537	5.64452	-2.43905	0.0180022	0.35407
ENSG00000168936	0.350836	4.13119	2.43804	0.0180079	0.35407
ENSG00000154080	0.989977	0.676516	2.4373	0.018041	0.35449
ENSG00000232702	1.00978	-2.59562	2.43643	0.0180804	0.354736
ENSG00000236842	0.937576	-1.13107	2.43531	0.0181306	0.354736
ENSG00000232174	-1.19105	-0.929095	-2.43612	0.0181328	0.354736
ENSG00000280604	-1.06487	4.58932	-2.43608	0.0181484	0.354736
ENSG00000265342	0.929809	-0.849332	2.43473	0.0181571	0.354736
ENSG00000259037	-0.969021	0.0945484	-2.43464	0.0181607	0.354736
ENSG00000224842	1.10024	0.215231	2.4344	0.0181718	0.354736
ENSG00000232006	0.63459	1.44036	2.43539	0.0181853	0.354736
ENSG00000224090	-1.50788	-2.89826	-2.43406	0.0181873	0.354736
ENSG00000099840	-0.537548	2.95541	-2.43399	0.0181902	0.354736
ENSG00000164105	-0.33054	5.26018	-2.43496	0.0182008	0.354736
ENSG00000259275	-1.18439	1.8501	-2.43464	0.0182087	0.354736
ENSG00000056972	-0.612077	2.35067	-2.43469	0.0182153	0.354736
ENSG00000216191	0.939435	-1.14804	2.43319	0.0182265	0.354736
ENSG00000173698	-1.303	-0.696657	-2.43314	0.0182287	0.354736
ENSG00000114554	0.47388	7.63034	2.433	0.0182777	0.355362
ENSG00000277526	-1.31182	1.83307	-2.43324	0.0182843	0.355362
ENSG00000175294	-1.13468	-2.27019	-2.43158	0.018313	0.355572
ENSG00000216809	0.47201	3.29462	2.43117	0.0183186	0.355572
ENSG00000272192	0.994067	-0.850982	2.43052	0.0183479	0.355915
ENSG00000235865	-1.27491	-1.90825	-2.42958	0.018391	0.356105
ENSG00000124203	0.959163	2.13457	2.42954	0.0183927	0.356105
ENSG00000087365	-0.254151	7.42536	-2.42966	0.0183929	0.356105
ENSG00000101158	-0.297742	5.69221	-2.42923	0.018407	0.35615
ENSG00000255608	0.655253	0.720925	2.42998	0.0184286	0.356198
ENSG00000134668	-1.12922	1.73168	-2.42978	0.0184329	0.356198
ENSG00000188167	0.326219	3.88922	2.42918	0.0184557	0.356252
ENSG00000208013	0.839048	-2.4539	2.42911	0.0184664	0.356252
ENSG00000223734	1.05439	-1.5985	2.42783	0.018471	0.356252
ENSG00000186891	-1.33988	-2.7255	-2.42709	0.018505	0.356683
ENSG00000130518	-0.631762	4.33928	-2.42737	0.0185465	0.357158
ENSG00000131931	0.354447	2.78163	2.42682	0.0185548	0.357158
ENSG00000270589	-0.761097	0.900239	-2.42692	0.018565	0.357158
ENSG00000272892	0.818799	-0.6015	2.42472	0.0186142	0.357307
ENSG00000243480	0.712438	1.20756	2.42577	0.0186255	0.357307
ENSG00000272969	0.846979	0.3406	2.42548	0.0186272	0.357307
ENSG00000213935	-0.661926	1.7701	-2.42572	0.0186275	0.357307
ENSG00000158186	-0.272004	5.81868	-2.42421	0.0186377	0.357307
ENSG00000196605	0.336133	5.55503	2.4238	0.018657	0.357307
ENSG00000256197	0.823452	-0.404835	2.42476	0.0186615	0.357307
ENSG00000224944	-1.80344	-1.59841	-2.42471	0.0186669	0.357307
ENSG00000234814	-1.11861	-0.575206	-2.42317	0.0186862	0.357452
ENSG00000165935	0.828973	0.638813	2.42263	0.0187112	0.357526
ENSG00000148700	-0.322763	6.87395	-2.42296	0.0187211	0.357526
ENSG00000198838	0.667518	8.27637	2.42232	0.0187254	0.357526
ENSG00000109805	0.692523	1.8333	2.42257	0.0187669	0.357852
ENSG00000172590	0.273051	3.95941	2.4223	0.0187811	0.357852
ENSG00000144410	0.481139	2.80941	2.42102	0.0187862	0.357852
ENSG00000253200	-0.463921	2.71437	-2.4222	0.0187896	0.357852
ENSG00000197372	0.25462	5.17388	2.42077	0.0188258	0.358315
ENSG00000182993	0.445168	2.05384	2.42034	0.0188778	0.35908
ENSG00000176994	0.219031	5.27537	2.41926	0.0188897	0.359081
ENSG00000226479	0.409829	3.82316	2.41955	0.0189036	0.359121
ENSG00000270641	-0.707142	1.63071	-2.4193	0.0189293	0.359163
ENSG00000257219	1.20929	-1.44239	2.41843	0.0189521	0.359163
ENSG00000187944	0.866582	1.02027	2.41874	0.0189527	0.359163
ENSG00000198879	-0.339388	6.91432	-2.41817	0.018964	0.359163
ENSG00000261716	-0.467708	3.2607	-2.4172	0.018965	0.359163
ENSG00000117152	0.754889	3.32121	2.41781	0.018992	0.359451
ENSG00000152684	0.462669	2.78304	2.41707	0.0190284	0.359501
ENSG00000251988	0.999262	-1.53505	2.41676	0.0190293	0.359501
ENSG00000226627	-1.20076	-1.13495	-2.41581	0.0190302	0.359501
ENSG00000278146	-1.35728	-3.00063	-2.41492	0.0190841	0.359514
ENSG00000165617	-0.66459	3.24601	-2.41486	0.0191263	0.359514
ENSG00000073050	-0.39289	4.77295	-2.41462	0.0191269	0.359514
ENSG00000260919	1.14073	-0.690564	2.41302	0.0191619	0.359514
ENSG00000136169	0.23757	5.2168	2.41299	0.0191634	0.359514
ENSG00000153214	0.387231	4.45073	2.41396	0.0191739	0.359514
ENSG00000091136	-0.895118	7.42016	-2.41374	0.0191851	0.359514
ENSG00000242986	0.574568	1.09692	2.41248	0.0191879	0.359514
ENSG00000250365	0.931047	-1.97108	2.41317	0.0192058	0.359514
ENSG00000226555	0.37724	1.27965	2.41303	0.0192251	0.359514
ENSG00000256238	-0.787969	-0.655997	-2.41152	0.0192332	0.359514
ENSG00000184205	-0.546225	9.35636	-2.41201	0.0192446	0.359514
ENSG00000179044	-1.45018	-1.28335	-2.41126	0.0192458	0.359514
ENSG00000279110	-1.08829	0.741849	-2.41123	0.019247	0.359514
ENSG00000276963	-1.28592	-2.56635	-2.41215	0.0192507	0.359514
ENSG00000196972	0.425207	4.47901	2.41187	0.0192543	0.359514
ENSG00000253976	-1.41119	-3.0099	-2.41106	0.0192555	0.359514
ENSG00000136040	-0.409194	6.11415	-2.41205	0.0192652	0.359514
ENSG00000236312	0.961916	-2.13369	2.41211	0.0192672	0.359514
ENSG00000188933	0.91448	3.04926	2.4108	0.0192677	0.359514
ENSG00000232940	0.598376	1.5469	2.41064	0.0192983	0.359863
ENSG00000271933	1.03083	-2.22203	2.40949	0.0193304	0.360079
ENSG00000189433	-1.48504	-2.37511	-2.40942	0.0193336	0.360079
ENSG00000273154	-1.12442	-0.741427	-2.4099	0.0193465	0.360099
ENSG00000278992	1.03947	-1.50571	2.40867	0.0193697	0.360222
ENSG00000258405	-0.467007	3.24604	-2.40945	0.0193768	0.360222
ENSG00000212541	0.994068	0.0852227	2.40809	0.0194346	0.360591
ENSG00000043591	1.00023	0.849802	2.40832	0.0194391	0.360591
ENSG00000168916	-0.745495	6.87866	-2.40819	0.019448	0.360591
ENSG00000243659	-0.578508	0.76771	-2.40686	0.0194561	0.360591
ENSG00000279148	0.711719	0.069009	2.40658	0.0194697	0.360591
ENSG00000224557	0.867632	2.62322	2.40656	0.0194708	0.360591
ENSG00000197540	-1.42247	-2.22507	-2.40616	0.0194898	0.360591
ENSG00000166313	-0.257963	6.89873	-2.40607	0.0194944	0.360591
ENSG00000250731	-1.09937	1.13447	-2.40661	0.0195083	0.360591
ENSG00000204305	-0.69456	1.87193	-2.40563	0.0195155	0.360591
ENSG00000066629	-0.37214	5.49466	-2.40575	0.0195506	0.360833
ENSG00000189045	0.486156	2.3804	2.40446	0.0195721	0.360833
ENSG00000173905	0.543594	5.21856	2.40473	0.0195742	0.360833
ENSG00000222715	1.10412	-2.08464	2.4051	0.0195764	0.360833
ENSG00000146910	-1.24953	-2.20948	-2.40441	0.0195922	0.360833
ENSG00000087076	-0.794017	3.48757	-2.40495	0.0196066	0.360833
ENSG00000240639	-1.4239	-2.69123	-2.40277	0.0196541	0.360833
ENSG00000234534	-0.523127	1.52732	-2.40274	0.0196553	0.360833
ENSG00000124602	-1.00393	0.269164	-2.40244	0.01967	0.360833
ENSG00000197536	-0.365867	5.54499	-2.40318	0.0196701	0.360833
ENSG00000145431	0.643895	2.60071	2.40223	0.0196802	0.360833
ENSG00000240024	0.394451	3.28376	2.40219	0.0197339	0.360833
ENSG00000176261	0.202738	5.43525	2.40105	0.0197376	0.360833
ENSG00000279281	0.399001	3.57838	2.4019	0.0197401	0.360833
ENSG00000274512	1.40407	0.722657	2.40182	0.0197516	0.360833
ENSG00000251155	0.671455	0.173409	2.40068	0.0197556	0.360833
ENSG00000153012	0.510745	3.89194	2.40164	0.0197637	0.360833
ENSG00000007237	-0.680498	6.47425	-2.40128	0.0197747	0.360833
ENSG00000171466	0.198232	5.69733	2.40064	0.01978	0.360833
ENSG00000131748	-0.34046	5.71375	-2.40058	0.0197832	0.360833
ENSG00000272474	0.920031	2.70949	2.40077	0.0197933	0.360833
ENSG00000114279	0.516932	5.98102	2.40079	0.0197947	0.360833
ENSG00000164967	0.406032	1.85151	2.39973	0.019802	0.360833
ENSG00000204624	-0.737104	4.64214	-2.39992	0.0198504	0.361207
ENSG00000215022	-0.392723	2.61922	-2.39864	0.0198554	0.361207
ENSG00000213977	-0.708838	0.567599	-2.39899	0.0198724	0.361207
ENSG00000251365	0.472429	1.96891	2.39949	0.0198728	0.361207
ENSG00000039650	-0.406609	5.32851	-2.39809	0.019882	0.361207
ENSG00000255585	-1.41382	-1.98926	-2.39776	0.0198986	0.361292
ENSG00000118418	-0.435979	5.23544	-2.3968	0.0199656	0.361968
ENSG00000275981	0.962085	-0.938245	2.39622	0.019974	0.361968
ENSG00000106789	0.382222	4.44279	2.39674	0.01998	0.361968
ENSG00000181819	1.03266	-0.854172	2.39728	0.0199835	0.361968
ENSG00000088881	-0.529949	3.82598	-2.39666	0.0200049	0.36214
ENSG00000275329	-1.06104	-0.757733	-2.39485	0.0200417	0.362384
ENSG00000130254	-0.350618	8.78745	-2.39584	0.0200478	0.362384
ENSG00000182199	-0.326493	3.91597	-2.3946	0.0200542	0.362384
ENSG00000100362	0.959714	0.559373	2.39498	0.0200877	0.36265
ENSG00000160117	-0.475772	2.13986	-2.39448	0.0200928	0.36265
ENSG00000242175	0.622495	0.351819	2.39471	0.0201089	0.362725
ENSG00000226609	0.959874	-1.21441	2.39234	0.0201661	0.363172
ENSG00000266733	-0.743953	1.14954	-2.39289	0.0201662	0.363172
ENSG00000235660	-1.27965	-1.59152	-2.39216	0.0201749	0.363172
ENSG00000167619	-0.621526	5.77628	-2.3927	0.0201815	0.363172
ENSG00000151690	0.318267	6.6611	2.39268	0.0202017	0.363319
ENSG00000221461	1.18843	-2.41818	2.39124	0.0202499	0.363779
ENSG00000207934	0.850085	-0.34667	2.39059	0.0202528	0.363779
ENSG00000283588	0.840437	0.159842	2.38988	0.0202884	0.363779
ENSG00000274827	-1.31602	-2.88007	-2.39013	0.0203177	0.363779
ENSG00000138785	0.32266	3.44398	2.39036	0.0203213	0.363779
ENSG00000272797	0.904483	-0.242224	2.38922	0.0203216	0.363779
ENSG00000202515	1.04648	3.26009	2.39033	0.0203226	0.363779
ENSG00000130713	-0.249908	5.25836	-2.39005	0.0203292	0.363779
ENSG00000238105	-0.427203	4.96487	-2.38932	0.0203351	0.363779
ENSG00000274021	1.09272	-1.66219	2.38917	0.0203587	0.363831
ENSG00000162909	-0.263354	7.47824	-2.38915	0.0203761	0.363831
ENSG00000161664	0.918527	-0.144742	2.38928	0.0203762	0.363831
ENSG00000262420	0.925037	-1.49285	2.38903	0.020386	0.363831
ENSG00000146007	-0.303008	5.45214	-2.38846	0.0204017	0.363899
ENSG00000271576	-0.463349	1.81944	-2.38731	0.0204171	0.363958
ENSG00000241187	0.622218	0.935996	2.3869	0.0204376	0.364111
ENSG00000184254	0.90335	1.22097	2.38688	0.0204796	0.364564
ENSG00000279217	-1.42898	-3.12697	-2.38573	0.0204968	0.364564
ENSG00000252982	0.443515	1.99864	2.38556	0.0205049	0.364564
ENSG00000156966	0.771192	1.26234	2.38489	0.020539	0.364564
ENSG00000207133	0.487784	3.17811	2.38571	0.0205402	0.364564
ENSG00000248332	0.44234	2.55553	2.38473	0.020547	0.364564
ENSG00000140519	0.69606	0.94099	2.3854	0.0205691	0.364564
ENSG00000227617	-0.918821	-1.85494	-2.38427	0.0205703	0.364564
ENSG00000214176	-0.30942	7.06496	-2.38462	0.0205711	0.364564
ENSG00000066923	-0.458681	2.91758	-2.38375	0.0205964	0.364799
ENSG00000229937	1.20062	-2.59542	2.38416	0.0206255	0.365102
ENSG00000259793	-0.881783	0.288451	-2.38353	0.0206462	0.365234
ENSG00000171448	0.275014	3.95564	2.38305	0.0206571	0.365234
ENSG00000254718	0.757136	-0.442716	2.3831	0.0206869	0.365473
ENSG00000231741	-0.556659	2.21513	-2.3829	0.0207025	0.365473
ENSG00000079616	-0.36067	4.24008	-2.38223	0.0207138	0.365473
ENSG00000261587	-1.0382	-0.563117	-2.38208	0.0207187	0.365473
ENSG00000236874	-1.13718	-2.78485	-2.38027	0.0207734	0.366021
ENSG00000153250	0.550813	5.53097	2.38121	0.0207773	0.366021
ENSG00000269352	-0.541033	2.65928	-2.38002	0.020786	0.366021
ENSG00000152137	0.592596	2.56866	2.38045	0.0208238	0.366181
ENSG00000163686	-0.313788	5.3374	-2.37975	0.0208305	0.366181
ENSG00000162687	0.704284	5.06033	2.38006	0.0208312	0.366181
ENSG00000006576	-0.394643	5.80255	-2.37879	0.0208488	0.366278
ENSG00000254349	0.528439	3.12793	2.37805	0.0209036	0.366728
ENSG00000232727	-1.10758	-0.55264	-2.37747	0.0209166	0.366728
ENSG00000165359	0.389539	5.18943	2.37781	0.0209225	0.366728
ENSG00000272871	0.414012	2.23823	2.37848	0.0209228	0.366728
ENSG00000083457	0.28236	3.78285	2.37803	0.0209377	0.366778
ENSG00000266965	0.356915	2.9901	2.37766	0.0209553	0.366875
ENSG00000152931	0.870066	0.558675	2.3763	0.0209768	0.367039
ENSG00000211695	-1.29438	-2.65812	-2.37571	0.0210073	0.367244
ENSG00000077279	0.604569	5.06366	2.37614	0.0210386	0.367244
ENSG00000143409	-0.705556	3.91201	-2.37532	0.021054	0.367244
ENSG00000116731	-0.296457	7.53643	-2.37564	0.0210596	0.367244
ENSG00000272824	0.561633	1.29195	2.37578	0.0210626	0.367244
ENSG00000255537	0.725714	-0.199514	2.37559	0.0210704	0.367244
ENSG00000148926	1.07302	2.74167	2.37527	0.0210732	0.367244
ENSG00000175854	-0.38162	3.08035	-2.37391	0.0210998	0.367497
ENSG00000258883	0.92786	-0.942175	2.37487	0.021113	0.367517
ENSG00000185340	0.401812	4.23326	2.37396	0.0211377	0.367735
ENSG00000200874	-1.13153	-2.22381	-2.37287	0.021154	0.367783
ENSG00000135365	-0.247054	6.28544	-2.37368	0.0211718	0.367783
ENSG00000204700	-1.37793	-1.68142	-2.372	0.0211988	0.367783
ENSG00000152683	0.311448	4.45923	2.37319	0.0211997	0.367783
ENSG00000259347	-1.19239	-0.938889	-2.37253	0.0212144	0.367783
ENSG00000202187	0.652988	0.0228464	2.37282	0.0212175	0.367783
ENSG00000178440	0.261448	4.26789	2.37149	0.0212252	0.367783
ENSG00000201077	1.01021	-2.55344	2.37093	0.0212545	0.368079
ENSG00000100227	-0.255995	4.93659	-2.37026	0.0212895	0.368332
ENSG00000196502	-0.358508	5.80233	-2.37019	0.0212933	0.368332
ENSG00000279246	-1.31494	-1.71329	-2.36967	0.02132	0.368341
ENSG00000232388	-0.564937	0.0672132	-2.36953	0.0213276	0.368341
ENSG00000225595	-1.47653	-1.42641	-2.36948	0.0213302	0.368341
ENSG00000260896	0.51585	0.994092	2.36823	0.0213956	0.36926
ENSG00000241959	-1.24227	-2.11033	-2.36768	0.0214244	0.369504
ENSG00000222932	1.02045	-2.61684	2.36832	0.0214546	0.369504
ENSG00000279075	0.808248	-1.20784	2.36706	0.0214569	0.369504
ENSG00000117000	-0.373155	6.59787	-2.36768	0.0214584	0.369504
ENSG00000163380	1.34992	0.370459	2.36668	0.0214766	0.369607
ENSG00000163467	0.960029	-2.56323	2.36637	0.0214931	0.369618
ENSG00000171759	-1.01227	2.4835	-2.367	0.0215234	0.369618
ENSG00000279584	0.787647	0.1112	2.36572	0.0215272	0.369618
ENSG00000281831	0.641293	1.44868	2.36667	0.0215327	0.369618
ENSG00000129219	-0.488511	4.32878	-2.36551	0.0215383	0.369618
ENSG00000184343	-0.61369	2.58864	-2.36509	0.0215605	0.369618
ENSG00000075223	-0.857221	5.48182	-2.36551	0.0215645	0.369618
ENSG00000140365	-0.316355	4.0419	-2.3654	0.0215747	0.369618
ENSG00000146001	-0.45107	3.46611	-2.36541	0.0215966	0.369786
ENSG00000275765	0.619571	1.15086	2.36421	0.0216437	0.370383
ENSG00000285651	-1.38152	-2.36076	-2.36283	0.0216802	0.3705
ENSG00000182628	-0.624088	3.18345	-2.36354	0.0216946	0.3705
ENSG00000213089	-0.818702	2.37882	-2.36343	0.0217059	0.3705
ENSG00000198730	0.251858	5.3335	2.36224	0.0217112	0.3705
ENSG00000199276	0.99446	-2.69697	2.36287	0.0217285	0.3705
ENSG00000137312	-0.266313	6.52779	-2.36146	0.0217524	0.3705
ENSG00000259868	0.547175	1.85684	2.36141	0.0217551	0.3705
ENSG00000254579	0.383022	3.8582	2.36092	0.0217814	0.3705
ENSG00000078081	0.598781	0.354187	2.36131	0.0218106	0.3705
ENSG00000145545	0.295158	4.52577	2.36122	0.0218276	0.3705
ENSG00000124181	-0.287952	7.67774	-2.3599	0.0218355	0.3705
ENSG00000105376	-1.42368	2.37885	-2.36089	0.0218459	0.3705
ENSG00000271387	0.608519	0.906861	2.3592	0.0218733	0.3705
ENSG00000187037	1.27109	-2.14099	2.35917	0.0218748	0.3705
ENSG00000244383	1.01926	-1.43705	2.36024	0.0218749	0.3705
ENSG00000070413	0.278642	6.023	2.35911	0.0218781	0.3705
ENSG00000144596	-0.911997	8.06228	-2.35991	0.0218903	0.3705
ENSG00000226051	0.924086	-0.610506	2.35874	0.0218976	0.3705
ENSG00000215795	0.729222	-0.0425349	2.35905	0.0219121	0.3705
ENSG00000225750	1.04734	-0.965431	2.35948	0.0219161	0.3705
ENSG00000234965	-2.12564	2.81677	-2.35951	0.0219169	0.3705
ENSG00000255508	-0.991752	-0.768724	-2.35785	0.0219453	0.3705
ENSG00000138756	0.397644	6.22735	2.35866	0.0219496	0.3705
ENSG00000175283	0.4722	2.26334	2.35871	0.0219618	0.3705
ENSG00000183251	-1.24207	-2.7404	-2.35745	0.0219669	0.3705
ENSG00000265992	-1.52966	-2.13811	-2.35844	0.0219679	0.3705
ENSG00000272323	0.554774	0.520544	2.35664	0.0220099	0.371004
ENSG00000278972	0.479672	2.11139	2.35564	0.0220637	0.371299
ENSG00000170571	0.431348	4.27391	2.35641	0.0220706	0.371299
ENSG00000167291	-0.37654	5.99903	-2.35634	0.0220746	0.371299
ENSG00000113269	-0.317078	7.04051	-2.35568	0.0220906	0.371299
ENSG00000128965	0.565252	1.10333	2.35626	0.0220944	0.371299
ENSG00000259485	-1.7667	0.0484684	-2.35585	0.0221039	0.371299
ENSG00000118369	0.401985	5.95568	2.35512	0.022113	0.371299
ENSG00000072110	-0.412917	7.16798	-2.35499	0.0221395	0.371538
ENSG00000141639	-0.650521	4.50478	-2.35502	0.0221573	0.371631
ENSG00000275092	0.408802	1.8125	2.35392	0.0222128	0.372133
ENSG00000256092	0.774264	0.309019	2.35372	0.0222246	0.372133
ENSG00000137558	0.619708	2.64299	2.35347	0.0222353	0.372133
ENSG00000235770	0.829628	0.493941	2.35342	0.0222363	0.372133
ENSG00000129514	0.99671	1.34139	2.35294	0.0222665	0.372384
ENSG00000267101	-1.37946	-3.21095	-2.35242	0.022278	0.372384
ENSG00000156587	-0.531816	3.47142	-2.35146	0.0222896	0.372384
ENSG00000214248	0.574429	1.23736	2.35083	0.0223242	0.372384
ENSG00000162191	-0.369835	5.40469	-2.35064	0.0223345	0.372384
ENSG00000264099	0.62328	0.442682	2.35175	0.022341	0.372384
ENSG00000243716	-0.534209	5.80448	-2.35113	0.0223594	0.372384
ENSG00000161021	-0.27069	6.16975	-2.35126	0.0223606	0.372384
ENSG00000260599	0.793721	0.768818	2.35089	0.0223617	0.372384
ENSG00000257279	-1.29536	-1.93864	-2.34916	0.0224152	0.373071
ENSG00000270964	0.71618	0.170983	2.34972	0.0224474	0.373334
ENSG00000239930	1.11418	-2.59213	2.34931	0.0224556	0.373334
ENSG00000070371	0.507142	5.80253	2.34869	0.0224768	0.373341
ENSG00000197558	-0.855007	5.60381	-2.34889	0.0224856	0.373341
ENSG00000200169	0.886268	0.148997	2.34814	0.0224974	0.373341
ENSG00000105722	-0.66823	2.67358	-2.34751	0.0225053	0.373341
ENSG00000255966	0.703819	0.92907	2.34726	0.0225189	0.373363
ENSG00000182372	0.320165	4.97722	2.34676	0.0225896	0.374145
ENSG00000253438	-0.646209	2.43682	-2.34709	0.0225907	0.374145
ENSG00000078098	-1.70791	-1.48836	-2.34437	0.022678	0.3752
ENSG00000199279	-1.08385	-2.01575	-2.34428	0.0226827	0.3752
ENSG00000076043	0.256246	4.5726	2.34466	0.0226915	0.3752
ENSG00000254461	-1.22967	-1.15197	-2.34357	0.0227221	0.375502
ENSG00000163788	0.34215	5.40773	2.3442	0.0227419	0.375624
ENSG00000261360	0.448546	2.85408	2.34235	0.0227899	0.376212
ENSG00000163331	0.865609	-0.195847	2.34312	0.0228076	0.376301
ENSG00000263232	-0.927833	-1.03789	-2.34175	0.0228229	0.376348
ENSG00000233008	0.573933	1.93868	2.34147	0.0228384	0.376399
ENSG00000101928	0.458053	1.2545	2.34204	0.0228696	0.376437
ENSG00000197635	-1.64372	-0.91794	-2.34071	0.0228807	0.376437
ENSG00000188612	-0.387154	3.80343	-2.34044	0.0228957	0.376437
ENSG00000265752	1.0443	-1.98111	2.34035	0.0229004	0.376437
ENSG00000233718	-1.14152	-0.779895	-2.34047	0.0229169	0.376437
ENSG00000206772	1.31096	-0.617693	2.33967	0.0229387	0.376437
ENSG00000167483	-0.529449	1.87672	-2.33941	0.0229807	0.376437
ENSG00000234771	-0.498262	4.5614	-2.3392	0.0229818	0.376437
ENSG00000260468	-1.93367	-1.29361	-2.33889	0.022982	0.376437
ENSG00000146221	-0.581489	1.79641	-2.33975	0.0229838	0.376437
ENSG00000196123	-0.437117	6.86826	-2.33881	0.0229865	0.376437
ENSG00000070388	-0.639396	2.01984	-2.33858	0.0230261	0.376437
ENSG00000169504	-0.969342	3.12591	-2.3376	0.0230542	0.376437
ENSG00000276712	0.956289	-2.62504	2.33818	0.0230546	0.376437
ENSG00000154479	-0.814514	1.7698	-2.33828	0.0230796	0.376437
ENSG00000237161	1.03235	0.145274	2.33697	0.0230896	0.376437
ENSG00000089022	-0.207746	6.85743	-2.33788	0.0230919	0.376437
ENSG00000108091	0.30285	5.64235	2.33781	0.0230976	0.376437
ENSG00000117971	-1.43815	-1.39805	-2.33676	0.0231014	0.376437
ENSG00000285162	-1.31656	-2.25036	-2.33736	0.0231064	0.376437
ENSG00000258484	-0.831041	0.692801	-2.33775	0.0231132	0.376437
ENSG00000143858	0.690892	5.7318	2.33759	0.0231135	0.376437
ENSG00000187257	-0.243215	6.04946	-2.33662	0.0231705	0.377164
ENSG00000187554	0.778778	2.19846	2.33481	0.0232109	0.377567
ENSG00000220494	0.835088	-0.727244	2.33464	0.0232202	0.377567
ENSG00000064932	-0.512489	4.53668	-2.33404	0.0232543	0.377672
ENSG00000186665	0.456822	2.01474	2.33466	0.0232769	0.377672
ENSG00000141542	-0.418823	4.99354	-2.33362	0.0232958	0.377672
ENSG00000213684	-1.2013	-3.01151	-2.33384	0.0232991	0.377672
ENSG00000143256	-0.400517	3.26178	-2.33369	0.0233201	0.377672
ENSG00000130818	0.286869	4.49359	2.33368	0.0233294	0.377672
ENSG00000277387	-1.23574	-1.34184	-2.33268	0.0233307	0.377672
ENSG00000275248	0.987623	-2.32319	2.33264	0.0233331	0.377672
ENSG00000147647	0.597496	2.56843	2.33248	0.0233422	0.377672
ENSG00000197360	0.662753	1.86709	2.33332	0.0233535	0.377672
ENSG00000136936	-0.211014	5.97342	-2.33305	0.0233738	0.377672
ENSG00000006007	0.307239	3.96868	2.33282	0.0233759	0.377672
ENSG00000245059	0.760135	-1.2501	2.33238	0.0234102	0.377863
ENSG00000237689	1.1224	-2.02435	2.33118	0.0234162	0.377863
ENSG00000118402	0.411831	4.5389	2.33186	0.0234339	0.377863
ENSG00000278673	0.702067	4.50344	2.33124	0.0234476	0.377863
ENSG00000234134	0.750453	-0.278928	2.33032	0.0234646	0.377863
ENSG00000270116	0.307197	3.16234	2.33139	0.0234671	0.377863
ENSG00000145217	-0.73425	1.13295	-2.33116	0.0234748	0.377863
ENSG00000169718	-0.311287	5.34629	-2.33028	0.0234971	0.377871
ENSG00000283945	-0.786031	2.40638	-2.33081	0.0235002	0.377871
ENSG00000164099	-0.976455	5.39331	-2.33036	0.0235257	0.37808
ENSG00000185634	-0.736021	2.73877	-2.32816	0.0235877	0.378876
ENSG00000132612	-0.285848	4.68368	-2.32713	0.0236466	0.379622
ENSG00000221680	0.965578	-3.02836	2.32718	0.0236709	0.37981
ENSG00000235574	-1.27143	-1.57428	-2.32542	0.0237449	0.380378
ENSG00000078795	0.672873	0.299765	2.32601	0.0237548	0.380378
ENSG00000176386	0.401848	1.90103	2.32516	0.0237597	0.380378
ENSG00000214772	0.95713	-0.267035	2.32593	0.0237757	0.380378
ENSG00000232968	-1.62096	-2.99806	-2.32531	0.0237909	0.380378
ENSG00000272056	-0.511635	1.64116	-2.32566	0.0237909	0.380378
ENSG00000004777	-0.477995	5.97624	-2.32501	0.0237974	0.380378
ENSG00000139364	0.587818	6.91093	2.32527	0.0238065	0.380378
ENSG00000254463	0.450387	2.11258	2.32396	0.0238287	0.380449
ENSG00000086159	-0.770283	0.784065	-2.32493	0.023836	0.380449
ENSG00000116396	-0.471839	6.56274	-2.32377	0.0238807	0.380869
ENSG00000141258	-0.427329	7.60765	-2.32377	0.0238874	0.380869
ENSG00000196218	-0.468287	8.84073	-2.32331	0.0239104	0.380948
ENSG00000168003	0.349401	5.79793	2.3232	0.0239175	0.380948
ENSG00000144119	1.18484	0.547609	2.32271	0.0239537	0.381325
ENSG00000117308	-0.320163	3.67722	-2.32135	0.0239796	0.381401
ENSG00000235488	1.03936	-2.43009	2.32211	0.0239836	0.381401
ENSG00000167615	-0.381401	9.27349	-2.32199	0.0239983	0.381407
ENSG00000139629	-0.999798	1.67349	-2.32084	0.0240091	0.381407
ENSG00000164683	0.371014	3.09194	2.32039	0.0240356	0.381504
ENSG00000132464	-1.48385	-2.96898	-2.32115	0.0240404	0.381504
ENSG00000167861	-0.311932	6.5335	-2.31976	0.0240719	0.381805
ENSG00000235319	0.916064	-1.01866	2.31899	0.024117	0.382167
ENSG00000177879	-0.305507	4.69219	-2.31894	0.0241199	0.382167
ENSG00000011332	-0.491526	4.9693	-2.31902	0.0241735	0.382817
ENSG00000087495	-0.268303	6.5802	-2.31842	0.0242115	0.38317
ENSG00000135637	-0.257085	4.22857	-2.31721	0.0242211	0.38317
ENSG00000091073	-0.694468	4.80902	-2.31763	0.0242545	0.383499
ENSG00000239884	-0.444565	1.84293	-2.31629	0.0242746	0.383616
ENSG00000090539	-1.0439	2.58417	-2.31573	0.0243076	0.383938
ENSG00000123992	-0.415317	4.21766	-2.31516	0.0243413	0.384184
ENSG00000148655	0.720057	3.29081	2.3149	0.0243566	0.384184
ENSG00000227392	-1.39026	-1.34219	-2.31476	0.0243646	0.384184
ENSG00000171469	0.207081	4.71459	2.31541	0.0243737	0.384184
ENSG00000120662	0.37224	4.14761	2.31431	0.0243909	0.384255
ENSG00000151176	0.341899	6.64284	2.31424	0.0244561	0.384938
ENSG00000112078	0.290181	5.16452	2.31375	0.0244867	0.384938
ENSG00000256462	-1.60023	-0.845196	-2.3134	0.0244999	0.384938
ENSG00000250418	1.00116	-1.90013	2.31316	0.0245155	0.384938
ENSG00000228218	-0.419782	3.06528	-2.31203	0.0245253	0.384938
ENSG00000073282	-1.14168	-1.17531	-2.31188	0.0245345	0.384938
ENSG00000260797	-1.91244	-2.09829	-2.31266	0.0245411	0.384938
ENSG00000267034	0.700887	0.557793	2.31149	0.0245573	0.384938
ENSG00000235214	0.938856	-1.02749	2.31144	0.0245607	0.384938
ENSG00000198830	-0.399176	5.11478	-2.31242	0.024561	0.384938
ENSG00000110881	-0.499321	6.44179	-2.3118	0.0245947	0.385266
ENSG00000214706	-0.478446	3.28151	-2.31014	0.0246378	0.385743
ENSG00000215861	0.426305	3.64586	2.30973	0.024662	0.385746
ENSG00000127252	0.478522	2.43357	2.30964	0.0246675	0.385746
ENSG00000114446	0.356973	4.49234	2.30975	0.0246838	0.385746
ENSG00000153786	0.31668	5.15817	2.30876	0.0247198	0.385746
ENSG00000206145	0.754472	0.333997	2.30856	0.0247315	0.385746
ENSG00000213981	-0.743109	1.21871	-2.30959	0.0247328	0.385746
ENSG00000125354	0.269222	6.27698	2.30867	0.0247349	0.385746
ENSG00000120049	-0.741914	6.39572	-2.30931	0.0247462	0.385746
ENSG00000114378	-0.533826	1.11737	-2.30832	0.0247878	0.385746
ENSG00000112144	-0.53415	4.63705	-2.30823	0.0247973	0.385746
ENSG00000065320	1.14869	3.46997	2.30799	0.0248015	0.385746
ENSG00000232618	-1.03999	-1.49378	-2.30807	0.0248059	0.385746
ENSG00000285668	1.42154	-1.67168	2.30813	0.0248089	0.385746
ENSG00000142627	-1.40731	0.802468	-2.30715	0.0248159	0.385746
ENSG00000150672	-0.300948	8.50364	-2.30734	0.0248623	0.386058
ENSG00000081059	-0.99775	1.17188	-2.30675	0.0248777	0.386058
ENSG00000078687	-0.225409	7.89804	-2.30673	0.0248937	0.386058
ENSG00000184508	0.328305	3.18509	2.30671	0.0248956	0.386058
ENSG00000251322	-0.402652	6.89208	-2.3065	0.0249061	0.386058
ENSG00000134539	0.768366	2.52208	2.30618	0.0249259	0.386058
ENSG00000231047	1.19602	-1.17195	2.30514	0.0249363	0.386058
ENSG00000151577	0.984523	-1.68683	2.30511	0.0249377	0.386058
ENSG00000145708	-0.680498	1.19968	-2.30425	0.0249893	0.386563
ENSG00000259673	0.408834	2.53951	2.30415	0.0249958	0.386563
ENSG00000221479	0.784325	0.839801	2.30458	0.025032	0.386917
ENSG00000118492	-1.08122	-1.40686	-2.30331	0.0250459	0.386917
ENSG00000163754	0.409995	3.08573	2.30424	0.025057	0.386917
ENSG00000165804	0.32504	4.31525	2.30226	0.0251093	0.387335
ENSG00000253444	-1.57409	-0.986808	-2.30308	0.0251165	0.387335
ENSG00000110013	0.339786	4.32595	2.30313	0.0251223	0.387335
ENSG00000232021	-1.53246	-0.149369	-2.30274	0.0251399	0.38741
ENSG00000278722	-0.736159	0.171782	-2.30114	0.0251773	0.387788
ENSG00000159650	-1.27883	-2.47207	-2.30093	0.02519	0.387788
ENSG00000255232	0.746998	-0.920158	2.30055	0.0252131	0.387947
ENSG00000285922	0.95035	-1.8822	2.30023	0.0252327	0.388051
ENSG00000279311	0.744151	1.49782	2.29955	0.0252737	0.38824
ENSG00000185433	-0.353152	3.05866	-2.30061	0.0252762	0.38824
ENSG00000285294	0.789247	0.160478	2.2992	0.0252951	0.38824
ENSG00000188522	0.604695	1.58106	2.30024	0.0252961	0.38824
ENSG00000243746	0.429494	0.711981	2.29871	0.0253249	0.388441
ENSG00000177138	1.28561	-0.916998	2.29845	0.0253403	0.388441
ENSG00000203441	0.952893	-1.47587	2.29809	0.0253624	0.388441
ENSG00000188779	-0.62876	1.69593	-2.29806	0.0253645	0.388441
ENSG00000267741	-1.07042	-2.44398	-2.2984	0.0253774	0.388441
ENSG00000187118	0.245832	3.75402	2.2977	0.025386	0.388441
ENSG00000184608	0.857631	-1.38692	2.29851	0.0254042	0.388525
ENSG00000214185	0.946912	-2.04507	2.297	0.0254289	0.38861
ENSG00000068615	0.366213	5.9041	2.29723	0.0254543	0.38861
ENSG00000164258	-0.28877	3.70478	-2.29726	0.0254554	0.38861
ENSG00000170638	-0.433464	4.47992	-2.29658	0.0254739	0.38861
ENSG00000263715	-0.90341	0.921271	-2.29713	0.0254839	0.38861
ENSG00000082898	0.278034	7.46981	2.2957	0.0255082	0.38861
ENSG00000207099	1.2397	0.511072	2.29551	0.0255202	0.38861
ENSG00000276866	-1.31042	-3.212	-2.29521	0.0255384	0.38861
ENSG00000117643	0.300527	6.1112	2.29499	0.0255519	0.38861
ENSG00000134207	-0.680647	4.56895	-2.29562	0.0255783	0.38861
ENSG00000180881	0.279405	5.8645	2.29444	0.0255857	0.38861
ENSG00000121769	0.454279	3.34109	2.29546	0.0255892	0.38861
ENSG00000273783	0.805768	-0.0685926	2.29507	0.0255928	0.38861
[truncated: 28,360 more rows]

## Sheet: C
Non-Neurons SCZ control
	logFC	AveExpr	t	P.Value	adj.P.Val
ENSG00000147576	0.635393	4.09912	4.65385	2.31913e-05	0.424649
ENSG00000196169	1.37222	5.57873	4.52678	2.9964e-05	0.424649
ENSG00000267339	-1.09003	3.39353	-4.23593	8.26174e-05	0.639435
ENSG00000154645	-0.791825	0.158355	-4.15086	0.000109312	0.639435
ENSG00000064666	1.13799	1.43377	4.14997	0.000112799	0.639435
ENSG00000268288	-1.39953	-0.809593	-4.02757	0.000164694	0.676183
ENSG00000260252	1.78639	-3.05266	3.97884	0.000193556	0.676183
ENSG00000139915	-0.734063	5.60878	-3.96253	0.000204461	0.676183
ENSG00000278090	1.54914	-1.9668	3.94358	0.000217421	0.676183
ENSG00000151025	-0.681649	5.37728	-3.89619	0.00025399	0.676183
ENSG00000147526	0.3102	8.0495	3.88785	0.000267894	0.676183
ENSG00000117151	0.630085	3.30326	3.86066	0.000286276	0.676183
ENSG00000284610	-1.40068	-0.383513	-3.81455	0.000331279	0.686286
ENSG00000180730	0.959487	1.14435	3.78348	0.000366255	0.686286
ENSG00000198585	0.470684	4.99245	3.72333	0.000444289	0.686286
ENSG00000257576	-0.797431	2.35351	-3.69395	0.00048907	0.686286
ENSG00000267683	-1.40445	0.164808	-3.67368	0.000520458	0.686286
ENSG00000124205	-2.02311	-1.2906	-3.60956	0.00063852	0.686286
ENSG00000073146	-0.886974	2.31735	-3.61038	0.000639735	0.686286
ENSG00000072315	-1.19269	2.32211	-3.60261	0.000651507	0.686286
ENSG00000158258	-0.662285	3.73247	-3.57367	0.000713416	0.686286
ENSG00000254684	-1.31572	-1.57622	-3.553	0.000761026	0.686286
ENSG00000250608	0.546129	3.3479	3.56648	0.000769294	0.686286
ENSG00000070371	0.523047	5.21762	3.54679	0.000776378	0.686286
ENSG00000254595	0.90456	-0.210862	3.54021	0.00079201	0.686286
ENSG00000113369	0.439541	5.61667	3.51309	0.000861666	0.686286
ENSG00000199172	-1.45895	-2.53715	-3.48234	0.000947712	0.686286
ENSG00000035499	1.04062	2.25367	3.47155	0.000979772	0.686286
ENSG00000257444	2.20985	-2.44432	3.46793	0.000990765	0.686286
ENSG00000119699	0.519498	4.61671	3.46714	0.000993172	0.686286
ENSG00000215186	1.31632	1.05104	3.46662	0.000994772	0.686286
ENSG00000090104	-1.88465	4.12059	-3.46534	0.0010019	0.686286
ENSG00000137845	-0.272756	7.63097	-3.46099	0.00101249	0.686286
ENSG00000275221	1.07223	0.375484	3.45609	0.00102753	0.686286
ENSG00000244378	-0.745298	0.64297	-3.4487	0.00105114	0.686286
ENSG00000129521	-0.445237	5.28268	-3.44487	0.00108888	0.686286
ENSG00000102678	-1.38996	-0.550531	-3.42477	0.00113469	0.686286
ENSG00000225630	1.73048	1.89753	3.4128	0.00117477	0.686286
ENSG00000183943	0.842174	4.95073	3.4112	0.00118067	0.686286
ENSG00000179938	1.34708	0.0753038	3.41039	0.00118394	0.686286
ENSG00000184205	0.651313	7.54762	3.42239	0.00120629	0.686286
ENSG00000258891	0.7644	1.01734	3.4022	0.00122334	0.686286
ENSG00000138161	-1.22717	-0.691368	-3.39039	0.0012563	0.686286
ENSG00000196976	-1.16808	-0.0329904	-3.38845	0.00126373	0.686286
ENSG00000201998	-0.90096	6.53268	-3.40692	0.00129722	0.686286
ENSG00000130487	1.70982	-2.61859	3.36794	0.00134493	0.686286
ENSG00000214903	-1.15771	-0.36164	-3.36667	0.00135012	0.686286
ENSG00000206634	-0.929934	6.09062	-3.37157	0.00135209	0.686286
ENSG00000153094	0.47834	3.25348	3.36129	0.00137231	0.686286
ENSG00000188388	1.27384	-0.243584	3.36135	0.00140299	0.686286
ENSG00000232628	-1.63583	-1.34414	-3.34612	0.00143731	0.686286
ENSG00000153165	-1.31471	0.198961	-3.34567	0.0014412	0.686286
ENSG00000160862	1.01026	4.47574	3.34431	0.00144466	0.686286
ENSG00000200243	1.65093	-0.706897	3.34307	0.00146145	0.686286
ENSG00000238121	1.49851	-1.42871	3.32943	0.00151095	0.686286
ENSG00000106330	-0.482346	1.92367	-3.32789	0.00151799	0.686286
ENSG00000198780	0.325972	5.47936	3.32721	0.00152109	0.686286
ENSG00000234616	0.337777	6.17081	3.31845	0.00156172	0.686286
ENSG00000184162	-0.704327	0.932557	-3.31834	0.00156265	0.686286
ENSG00000122862	-1.36897	2.24082	-3.31661	0.00157678	0.686286
ENSG00000126267	-0.512219	2.64497	-3.31509	0.00158129	0.686286
ENSG00000153310	-0.250252	6.38051	-3.31785	0.00160485	0.686286
ENSG00000272071	-1.39866	-2.01218	-3.3073	0.00161497	0.686286
ENSG00000130731	-0.42516	2.4837	-3.3054	0.0016242	0.686286
ENSG00000102878	0.552053	4.65523	3.30886	0.00162849	0.686286
ENSG00000103150	0.408192	7.23648	3.32493	0.00166854	0.686286
ENSG00000126561	0.423482	4.39387	3.28747	0.00172616	0.686286
ENSG00000270074	-1.44175	-1.52757	-3.26762	0.00181851	0.686286
ENSG00000167604	-1.00834	2.30332	-3.26551	0.00183019	0.686286
ENSG00000181215	-0.702594	2.15252	-3.26458	0.0018356	0.686286
ENSG00000250148	1.03818	1.28064	3.26198	0.0018493	0.686286
ENSG00000169508	-1.59615	-0.530483	-3.25759	0.00188559	0.686286
ENSG00000143194	-1.16802	-0.333283	-3.25521	0.00188698	0.686286
ENSG00000250151	1.35885	-2.02001	3.25238	0.00190295	0.686286
ENSG00000137331	-1.57142	2.15911	-3.24891	0.00192267	0.686286
ENSG00000173852	-0.465488	4.8888	-3.2474	0.00193213	0.686286
ENSG00000240395	-1.92714	-2.38663	-3.24536	0.00194441	0.686286
ENSG00000229358	-0.418888	3.38908	-3.24223	0.00196116	0.686286
ENSG00000170345	-1.21609	5.20797	-3.23382	0.00201152	0.686286
ENSG00000120129	-1.00076	5.38473	-3.22068	0.00209143	0.686286
ENSG00000280394	-1.44967	-2.03338	-3.21728	0.00211164	0.686286
ENSG00000242278	-1.32636	-1.22375	-3.2123	0.0021429	0.686286
ENSG00000138152	-0.839376	1.64121	-3.21159	0.00214743	0.686286
ENSG00000186188	-1.52397	-0.702812	-3.20948	0.00216589	0.686286
ENSG00000110092	-0.813588	4.57935	-3.20676	0.00217823	0.686286
ENSG00000243005	-0.710583	-0.041568	-3.19984	0.00222315	0.686286
ENSG00000231744	-0.546971	1.90728	-3.19929	0.00222677	0.686286
ENSG00000119938	-0.9572	1.7193	-3.19848	0.00223416	0.686286
ENSG00000204929	-0.887403	0.981916	-3.19746	0.0022388	0.686286
ENSG00000214897	2.48565	-1.88109	3.19471	0.00225702	0.686286
ENSG00000070761	-0.422902	3.44828	-3.19076	0.00228335	0.686286
ENSG00000226964	1.02115	-0.665418	3.18823	0.00230043	0.686286
ENSG00000164932	-1.28067	-0.783955	-3.18466	0.00232469	0.686286
ENSG00000186153	0.301083	6.10623	3.18306	0.00233568	0.686286
ENSG00000242214	1.09195	-1.46996	3.17877	0.00236551	0.686286
ENSG00000133318	-0.25108	6.7226	-3.17605	0.00238426	0.686286
ENSG00000226310	-0.745456	1.72775	-3.17801	0.00239025	0.686286
ENSG00000252291	-1.08874	-1.04967	-3.17679	0.002392	0.686286
ENSG00000257704	-0.596573	1.51971	-3.1683	0.00243901	0.686286
ENSG00000266213	-1.59058	-1.12348	-3.16279	0.00247898	0.686286
ENSG00000225385	-1.44439	-2.05547	-3.16538	0.00250176	0.686286
ENSG00000136436	0.330631	6.94127	3.15332	0.00254831	0.686286
ENSG00000245864	-1.40143	-1.2284	-3.1532	0.00254922	0.686286
ENSG00000164100	-0.91874	0.900956	-3.15064	0.00256835	0.686286
ENSG00000173198	-1.22721	-0.307809	-3.1486	0.00258738	0.686286
ENSG00000078596	-1.00249	2.2088	-3.15392	0.00258919	0.686286
ENSG00000270953	-0.905193	0.0889773	-3.14681	0.00259953	0.686286
ENSG00000258090	-1.38587	-1.95386	-3.14524	0.00261497	0.686286
ENSG00000246705	0.406842	3.61948	3.13988	0.00265027	0.689167
ENSG00000166816	0.413318	3.84546	3.12921	0.00273389	0.704449
ENSG00000074582	-0.26621	4.41149	-3.12579	0.00276125	0.70509
ENSG00000277202	1.45703	-2.50693	3.12441	0.00283572	0.715743
ENSG00000203727	-1.34659	0.291721	-3.11485	0.00285436	0.715743
ENSG00000267765	0.812448	-0.106202	3.108	0.0029076	0.715743
ENSG00000119711	0.325087	4.66768	3.13024	0.00294365	0.715743
ENSG00000165071	-1.44695	-0.908556	-3.10348	0.00294988	0.715743
ENSG00000248790	-0.878984	0.213788	-3.10145	0.00296604	0.715743
ENSG00000130332	-0.435806	3.7087	-3.09535	0.00301598	0.715743
ENSG00000236762	-1.50089	-0.684625	-3.09434	0.00302485	0.715743
ENSG00000272269	-1.24555	-2.72252	-3.09218	0.0030438	0.715743
ENSG00000251389	-1.24778	-0.811989	-3.09085	0.00305549	0.715743
ENSG00000248697	1.53046	-3.06195	3.08503	0.00310727	0.721905
ENSG00000238961	-0.746842	6.5547	-3.07926	0.00315938	0.728044
ENSG00000201047	1.32761	-2.55739	3.08365	0.00321494	0.72888
ENSG00000186281	-0.993665	2.32433	-3.06921	0.00326372	0.72888
ENSG00000240499	1.20723	-1.95836	3.06227	0.00331775	0.72888
ENSG00000130810	0.506642	2.08357	3.06132	0.0033268	0.72888
ENSG00000114125	0.386148	3.15819	3.06099	0.00333007	0.72888
ENSG00000219747	-1.1268	-0.0476794	-3.06075	0.00333403	0.72888
ENSG00000198408	0.27631	8.56891	3.05512	0.00338659	0.72888
ENSG00000201512	-0.81458	1.0485	-3.05435	0.00339439	0.72888
ENSG00000160310	-0.254842	7.39613	-3.07	0.00339444	0.72888
ENSG00000267342	0.871287	0.736631	3.04591	0.00347718	0.733288
ENSG00000125814	-0.309367	5.34272	-3.04534	0.00348288	0.733288
ENSG00000212024	1.43301	-2.57529	3.04436	0.00349259	0.733288
ENSG00000152954	-0.832389	3.01548	-3.03694	0.00356772	0.743556
ENSG00000260120	1.57658	-3.55937	3.03104	0.00362822	0.745756
ENSG00000147123	-0.564696	2.29888	-3.0308	0.0036309	0.745756
ENSG00000235529	-0.490041	4.09418	-3.02542	0.00368696	0.751822
ENSG00000250977	1.47216	-2.51852	3.01319	0.00381766	0.769025
ENSG00000269176	0.657686	0.464713	3.01166	0.00383436	0.769025
ENSG00000182253	0.385769	7.93527	3.00998	0.00385272	0.769025
ENSG00000272163	0.801871	0.655519	2.99991	0.00396595	0.778476
ENSG00000259790	2.04434	-0.504072	2.99887	0.00397704	0.778476
ENSG00000224016	-1.22042	-1.79703	-2.9894	0.00408929	0.778476
ENSG00000250182	-1.49112	-0.508441	-2.98593	0.00413471	0.778476
ENSG00000238835	-0.764868	0.574244	-2.98483	0.00413772	0.778476
ENSG00000160867	1.0736	0.783229	2.98253	0.00416477	0.778476
ENSG00000271185	1.33745	-2.12646	2.98232	0.00416717	0.778476
ENSG00000135643	0.607544	5.49575	2.98143	0.00417767	0.778476
ENSG00000255437	-1.34356	-2.85141	-2.98457	0.00419234	0.778476
ENSG00000233028	1.47873	-3.1662	2.97815	0.00421666	0.778476
ENSG00000156414	-0.727808	2.53561	-2.97592	0.00424334	0.778476
ENSG00000151208	0.316569	6.98309	2.97162	0.00429518	0.778476
ENSG00000207344	-0.995457	2.81438	-2.97357	0.00429902	0.778476
ENSG00000230490	-0.473084	2.97329	-2.9679	0.00434049	0.778476
ENSG00000103226	-0.732618	2.78246	-2.96688	0.00435306	0.778476
ENSG00000154127	-0.666795	2.4241	-2.96616	0.00436355	0.778476
ENSG00000285649	1.516	-2.60491	2.96131	0.00442184	0.778476
ENSG00000261367	1.21878	-1.06297	2.95659	0.00448103	0.778476
ENSG00000141504	-0.317632	4.05414	-2.95381	0.00451629	0.778476
ENSG00000212402	-0.645061	5.61108	-2.95161	0.0045443	0.778476
ENSG00000134882	-0.257403	4.73018	-2.96809	0.00455738	0.778476
ENSG00000188662	0.709291	2.02652	2.95043	0.00455935	0.778476
ENSG00000112499	1.19634	-1.41231	2.94755	0.00459645	0.778476
ENSG00000214389	-1.56163	-1.74455	-2.94756	0.00459894	0.778476
ENSG00000224295	-1.26214	-1.60945	-2.94663	0.00461479	0.778476
ENSG00000208892	-0.717953	8.39002	-2.95022	0.0046167	0.778476
ENSG00000202374	-1.07002	-0.469945	-2.94076	0.0046849	0.778476
ENSG00000256139	0.40923	2.59731	2.93924	0.00470529	0.778476
ENSG00000184925	-0.792359	1.76524	-2.93887	0.00472463	0.778476
ENSG00000103707	0.279646	3.26163	2.93705	0.004734	0.778476
ENSG00000065534	0.354977	6.15999	2.93566	0.00475248	0.778476
ENSG00000099985	-1.95882	-2.12898	-2.93207	0.00480073	0.778476
ENSG00000261218	-1.18702	-0.912617	-2.93173	0.00480706	0.778476
ENSG00000276282	0.917506	-0.406997	2.92705	0.00486836	0.778476
ENSG00000201229	-0.923369	3.59205	-2.92672	0.00487297	0.778476
ENSG00000226812	1.76648	-2.86844	2.92471	0.00490214	0.778476
ENSG00000263874	0.498594	1.65397	2.92296	0.0049244	0.778476
ENSG00000271967	1.0545	-1.05678	2.91873	0.00498301	0.778476
ENSG00000265393	1.1178	-1.47543	2.91751	0.00499999	0.778476
ENSG00000207780	-0.559999	2.83826	-2.91333	0.00505871	0.778476
ENSG00000239961	-1.20333	0.486319	-2.89975	0.00525374	0.778476
ENSG00000157833	-0.499523	4.26988	-2.89835	0.00527431	0.778476
ENSG00000114315	-1.22649	1.053	-2.89849	0.00527624	0.778476
ENSG00000254051	-0.993158	0.366335	-2.89812	0.00528039	0.778476
ENSG00000238363	-1.3892	4.69841	-2.89577	0.00531237	0.778476
ENSG00000160213	-0.356301	3.18364	-2.89358	0.00534476	0.778476
ENSG00000106236	1.65354	2.96841	2.89356	0.00534821	0.778476
ENSG00000030582	-0.368216	4.17071	-2.89545	0.00536985	0.778476
ENSG00000257773	1.55825	-2.4039	2.89098	0.00538349	0.778476
ENSG00000163046	-1.33505	0.565525	-2.8898	0.00540119	0.778476
ENSG00000279457	-0.538868	2.81785	-2.88631	0.00545378	0.778476
ENSG00000162736	-0.242919	5.31972	-2.88361	0.00549479	0.778476
ENSG00000162989	-1.08461	1.08392	-2.8843	0.0054984	0.778476
ENSG00000279394	-0.927169	-0.151532	-2.8811	0.00553313	0.778476
ENSG00000116774	-1.03987	2.61074	-2.88039	0.00554398	0.778476
ENSG00000112149	-1.16989	2.08761	-2.87899	0.00556658	0.778476
ENSG00000212443	-0.887302	3.03845	-2.87414	0.00564084	0.778476
ENSG00000226741	1.90228	-1.7771	2.8737	0.00565009	0.778476
ENSG00000150990	0.277561	5.87967	2.87374	0.00575647	0.778476
ENSG00000242952	-1.14299	-0.702809	-2.86515	0.00578364	0.778476
ENSG00000201831	-1.61729	-1.4742	-2.86274	0.00582145	0.778476
ENSG00000138131	-0.994333	0.355978	-2.8621	0.005832	0.778476
ENSG00000119403	0.38257	6.00383	2.86121	0.00584617	0.778476
ENSG00000207233	-0.858184	2.74941	-2.85668	0.00591973	0.778476
ENSG00000252213	-1.16202	3.44707	-2.84638	0.00609005	0.778476
ENSG00000160789	0.395188	6.19732	2.84126	0.0061765	0.778476
ENSG00000134326	-0.854516	1.69005	-2.83916	0.00621324	0.778476
ENSG00000254349	-0.594538	1.44679	-2.8389	0.00621672	0.778476
ENSG00000149761	0.28657	3.61093	2.83881	0.00621816	0.778476
ENSG00000280224	1.53021	-3.81356	2.83863	0.00624909	0.778476
ENSG00000130396	0.269445	9.20226	2.83591	0.00626785	0.778476
ENSG00000210841	1.37688	-2.97186	2.8328	0.00632174	0.778476
ENSG00000142549	-0.735026	1.82374	-2.83196	0.00634671	0.778476
ENSG00000173674	0.359152	3.61273	2.83139	0.00635425	0.778476
ENSG00000169918	0.414326	7.59587	2.83079	0.00635671	0.778476
ENSG00000105298	0.312373	5.46828	2.83006	0.00636934	0.778476
ENSG00000243746	-0.800805	0.226432	-2.82936	0.00638996	0.778476
ENSG00000233024	-1.55625	-2.12386	-2.82726	0.00641851	0.778476
ENSG00000180611	-0.470144	1.92257	-2.82682	0.00643042	0.778476
ENSG00000206838	-0.656267	5.55399	-2.82378	0.0064799	0.778476
ENSG00000252153	-0.503085	1.64896	-2.82323	0.00648973	0.778476
ENSG00000280118	-0.711894	1.9133	-2.82144	0.00652167	0.778476
ENSG00000125356	-0.58997	1.82049	-2.82571	0.00653792	0.778476
ENSG00000187772	-1.33184	-2.28677	-2.82	0.00654737	0.778476
ENSG00000154608	-0.694656	1.64163	-2.81792	0.00658472	0.778476
ENSG00000281852	-1.078	-0.132081	-2.81724	0.00659692	0.778476
ENSG00000263717	-0.958231	0.443067	-2.81581	0.00662285	0.778476
ENSG00000269925	-0.861321	-0.436426	-2.8163	0.00664099	0.778476
ENSG00000206181	1.34532	-1.96328	2.81254	0.00668238	0.778476
ENSG00000151062	0.735468	1.98958	2.81171	0.00669796	0.778476
ENSG00000208308	-0.910459	1.63009	-2.81036	0.0067222	0.778476
ENSG00000101098	-0.980016	0.222929	-2.81026	0.00672876	0.778476
ENSG00000063015	-0.614655	2.87122	-2.81594	0.00674562	0.778476
ENSG00000104808	0.911169	-0.68848	2.80483	0.00682452	0.778476
ENSG00000166352	-0.473245	3.27592	-2.79962	0.00692214	0.778476
ENSG00000233608	-1.42701	-1.79331	-2.79693	0.00697298	0.778476
ENSG00000137857	0.639359	2.63173	2.7967	0.00697736	0.778476
ENSG00000118939	-0.691959	0.815165	-2.79445	0.00702025	0.778476
ENSG00000230360	1.4857	-1.32055	2.79455	0.00702941	0.778476
ENSG00000272562	0.754663	0.635459	2.79357	0.00703714	0.778476
ENSG00000249853	-0.442693	4.58009	-2.79348	0.00704543	0.778476
ENSG00000204113	1.09482	-2.40923	2.79218	0.00706371	0.778476
ENSG00000105974	1.0158	0.44671	2.792	0.00706724	0.778476
ENSG00000224063	-0.999365	-0.111794	-2.78816	0.0071414	0.778476
ENSG00000163032	-1.20562	2.26209	-2.78888	0.00714477	0.778476
ENSG00000254040	-1.45589	0.915231	-2.78774	0.00714953	0.778476
ENSG00000280334	0.944425	0.167356	2.78898	0.00715559	0.778476
ENSG00000181631	-1.4313	1.47474	-2.78636	0.00717638	0.778476
ENSG00000176834	0.283141	4.61182	2.78556	0.00719216	0.778476
ENSG00000275468	-1.26585	-0.321529	-2.78572	0.00719292	0.778476
ENSG00000264278	0.713282	0.492053	2.78334	0.00723553	0.778476
ENSG00000150681	-1.21496	-0.421907	-2.78169	0.0072686	0.778476
ENSG00000261007	-0.830904	0.823691	-2.77873	0.0073266	0.778476
ENSG00000198088	-1.19266	-0.696519	-2.77824	0.0073477	0.778476
ENSG00000136750	-1.78455	1.00173	-2.77762	0.00735379	0.778476
ENSG00000187534	-1.08859	-0.0274473	-2.77705	0.00736019	0.778476
ENSG00000254083	1.35637	-2.90935	2.77649	0.00737138	0.778476
ENSG00000113327	-1.18902	1.51321	-2.77566	0.00739162	0.778476
ENSG00000207954	-0.607972	2.7298	-2.77546	0.00739513	0.778476
ENSG00000112799	-1.29953	0.303546	-2.77444	0.00741235	0.778476
ENSG00000152932	-0.852056	2.81052	-2.77252	0.00745226	0.778476
ENSG00000278970	0.366655	2.92036	2.77207	0.00746023	0.778476
ENSG00000197753	-1.29224	-1.78774	-2.77176	0.0074665	0.778476
ENSG00000064102	-0.43426	6.23053	-2.77167	0.00746835	0.778476
ENSG00000197728	-0.562402	2.48098	-2.77014	0.0075069	0.778476
ENSG00000265972	0.461221	6.42086	2.77114	0.00751104	0.778476
ENSG00000167850	-1.18582	-0.198598	-2.76801	0.0075427	0.778476
ENSG00000104863	-0.439033	2.28821	-2.7663	0.00757752	0.778476
ENSG00000134242	-0.953114	-0.340322	-2.76649	0.0075791	0.778476
ENSG00000272334	1.24295	-2.31454	2.7646	0.00761254	0.778476
ENSG00000244662	2.08032	-1.87549	2.76455	0.00761366	0.778476
ENSG00000169957	0.326209	3.93668	2.76397	0.00762555	0.778476
ENSG00000254500	-1.21942	-2.59387	-2.76084	0.00769026	0.778476
ENSG00000243449	-0.452114	2.14691	-2.75983	0.00771127	0.778476
ENSG00000174428	0.363342	5.52442	2.75766	0.00775658	0.778476
ENSG00000260981	0.736777	1.56434	2.75813	0.00776068	0.778476
ENSG00000187720	0.845078	2.43	2.76393	0.00776489	0.778476
ENSG00000251003	-1.34005	0.685399	-2.75684	0.00779419	0.778476
ENSG00000281732	1.21793	-2.4279	2.75582	0.00779914	0.778476
ENSG00000175161	-0.373752	6.93077	-2.75424	0.00782851	0.778476
ENSG00000122786	0.49969	8.90939	2.75864	0.00787632	0.778476
ENSG00000178031	-1.32678	0.204538	-2.75187	0.00787878	0.778476
ENSG00000223528	0.764022	0.143899	2.75065	0.0079059	0.778476
ENSG00000154162	-1.19396	1.21648	-2.75059	0.00791009	0.778476
ENSG00000186056	0.447815	4.31611	2.74955	0.00792837	0.778476
ENSG00000238372	-1.15374	-2.72486	-2.74935	0.00795697	0.778476
ENSG00000235927	0.965593	-0.527456	2.74581	0.00800867	0.778476
ENSG00000116761	0.47097	1.76515	2.7434	0.00806135	0.778476
ENSG00000233718	0.883074	-0.950389	2.74298	0.00808032	0.778476
ENSG00000116985	0.37846	3.3106	2.7491	0.00811038	0.778476
ENSG00000112081	-0.236254	6.21602	-2.75553	0.0081513	0.778476
ENSG00000234336	-0.864552	-0.513451	-2.73914	0.00815368	0.778476
ENSG00000228768	-1.0399	-0.930447	-2.73763	0.00818693	0.778476
ENSG00000111981	1.50418	-3.22928	2.73577	0.00822793	0.778476
ENSG00000181773	-1.32648	-1.95631	-2.73501	0.00825154	0.778476
ENSG00000237973	1.75847	2.06424	2.73479	0.00829923	0.778476
ENSG00000248592	-0.693075	0.139948	-2.73347	0.00830076	0.778476
ENSG00000172939	-0.204401	5.47892	-2.73156	0.00832155	0.778476
ENSG00000037241	0.532557	1.21237	2.73085	0.00833737	0.778476
ENSG00000226683	-1.15005	-1.83764	-2.7299	0.00836039	0.778476
ENSG00000131471	0.727653	0.446363	2.73202	0.00837438	0.778476
ENSG00000126264	-1.17673	-2.26774	-2.72837	0.00839323	0.778476
ENSG00000264727	1.19115	-2.10058	2.7313	0.00841874	0.778476
ENSG00000285888	1.29056	-3.58762	2.72474	0.00847509	0.778476
ENSG00000178460	-0.793663	0.41817	-2.72447	0.00848116	0.778476
ENSG00000235974	0.777001	-0.468944	2.72402	0.00849154	0.778476
ENSG00000169032	-0.285918	4.72539	-2.72292	0.00851839	0.778476
ENSG00000198315	0.271601	6.47731	2.72213	0.00853452	0.778476
ENSG00000177432	-0.429752	2.71966	-2.72232	0.00854265	0.778476
ENSG00000260776	1.39583	1.71623	2.71979	0.00861468	0.778476
ENSG00000119707	0.408483	10.1072	2.71809	0.00864233	0.778476
ENSG00000118495	-0.71611	2.79625	-2.71712	0.00865053	0.778476
ENSG00000153233	-1.27919	-1.11056	-2.71677	0.00869505	0.778476
ENSG00000074317	-1.29053	1.11923	-2.71426	0.00873626	0.778476
ENSG00000161921	-0.77598	2.06304	-2.7137	0.00873652	0.778476
ENSG00000122728	-0.788365	0.75703	-2.7129	0.00874935	0.778476
ENSG00000165617	0.629955	2.11086	2.71462	0.0087741	0.778476
ENSG00000006704	0.296472	5.915	2.71061	0.0088019	0.778476
ENSG00000108604	0.314485	6.0892	2.70999	0.00881636	0.778476
ENSG00000175066	-0.44152	7.15336	-2.70748	0.00887567	0.780121
ENSG00000121690	-0.487237	3.67338	-2.70322	0.00897714	0.780121
ENSG00000170469	0.342852	1.946	2.70296	0.00898345	0.780121
ENSG00000145569	-1.00221	3.95091	-2.70651	0.00899015	0.780121
ENSG00000248278	-0.957875	-0.606941	-2.70127	0.00902408	0.780121
ENSG00000283667	-0.745915	0.221595	-2.69986	0.00905803	0.780121
ENSG00000250742	-1.19022	-0.752937	-2.69612	0.00915871	0.780121
ENSG00000281708	-0.734739	1.47649	-2.69524	0.00917559	0.780121
ENSG00000170190	-1.13956	-0.320269	-2.69526	0.00917612	0.780121
ENSG00000202382	-1.01308	-1.34532	-2.6945	0.00918828	0.780121
ENSG00000229132	-1.24401	-2.09989	-2.69372	0.00920731	0.780121
ENSG00000136457	-1.00873	0.192286	-2.69261	0.00923484	0.780121
ENSG00000134343	-1.15099	0.336914	-2.69253	0.00924175	0.780121
ENSG00000128578	-0.568653	3.02336	-2.69243	0.00924769	0.780121
ENSG00000256695	1.6456	-2.61196	2.69268	0.00924784	0.780121
ENSG00000260669	0.655013	2.08472	2.68992	0.0093009	0.782269
ENSG00000198740	0.412798	7.98475	2.68835	0.00934234	0.783207
ENSG00000172824	0.379871	7.30184	2.68644	0.00938752	0.783207
ENSG00000253954	-1.35841	-2.10841	-2.68614	0.00939495	0.783207
ENSG00000108433	0.248205	5.82902	2.68472	0.00943047	0.783863
ENSG00000224236	-1.28042	-2.90901	-2.68253	0.00948547	0.785094
ENSG00000236494	-1.29435	-2.37024	-2.68149	0.0095118	0.785094
ENSG00000154518	-0.378673	2.46072	-2.68132	0.00952838	0.785094
ENSG00000280339	-0.936462	-0.430757	-2.67867	0.00959501	0.788293
ENSG00000198841	-1.0256	-0.910132	-2.672	0.00975408	0.789221
ENSG00000249738	-1.47659	2.96967	-2.67141	0.00976949	0.789221
ENSG00000204172	-0.452403	5.06199	-2.67095	0.00978138	0.789221
ENSG00000277437	1.44515	3.71955	2.67127	0.0097899	0.789221
ENSG00000253764	0.460563	2.80407	2.67023	0.00980014	0.789221
ENSG00000229956	-0.419792	2.68425	-2.67012	0.00980293	0.789221
ENSG00000248610	-1.03391	-0.944401	-2.66919	0.00982709	0.789221
ENSG00000038295	-1.31231	0.0236842	-2.66833	0.0098622	0.789221
ENSG00000183840	-0.95846	-0.591668	-2.66715	0.00993082	0.789221
ENSG00000217801	-1.1656	-1.07158	-2.66441	0.00995203	0.789221
ENSG00000177984	1.3204	-1.52455	2.66673	0.00995353	0.789221
ENSG00000270442	1.30637	0.277992	2.66338	0.00997929	0.789221
ENSG00000158813	0.34568	2.36026	2.66116	0.0100379	0.789221
ENSG00000205035	-1.54818	-1.66403	-2.65686	0.0101529	0.789221
ENSG00000153814	-0.263881	4.03524	-2.66959	0.0101793	0.789221
ENSG00000279058	-1.29369	-0.979652	-2.65573	0.0101831	0.789221
ENSG00000130066	-0.72855	6.77409	-2.65375	0.0102366	0.789221
ENSG00000206159	1.36668	-0.557563	2.65459	0.010254	0.789221
ENSG00000130821	0.506375	6.56166	2.65182	0.0102887	0.789221
ENSG00000261701	1.28288	0.526465	2.65037	0.0103281	0.789221
ENSG00000256590	0.941455	-2.14726	2.64954	0.0103508	0.789221
ENSG00000267437	1.11729	-1.4039	2.65247	0.0103541	0.789221
ENSG00000272764	0.650562	0.729767	2.64791	0.0103953	0.789221
ENSG00000237887	-0.361056	3.60052	-2.64686	0.0104241	0.789221
ENSG00000155115	-0.410213	2.9545	-2.64692	0.0105408	0.789221
ENSG00000260735	0.894684	0.472581	2.64173	0.0105658	0.789221
ENSG00000276728	0.503639	1.95585	2.64135	0.0105965	0.789221
ENSG00000243915	-0.545556	3.35075	-2.64762	0.0106016	0.789221
ENSG00000255520	1.15306	-3.03941	2.64794	0.0106046	0.789221
ENSG00000253013	-1.20909	-0.729503	-2.63886	0.0106746	0.789221
ENSG00000233230	0.503099	1.36283	2.63735	0.0106883	0.789221
ENSG00000260300	0.467382	2.40535	2.63914	0.0107066	0.789221
ENSG00000148123	-0.420633	4.37901	-2.63631	0.0107175	0.789221
ENSG00000283385	1.24164	-2.11239	2.63616	0.0107215	0.789221
ENSG00000279476	-0.426077	2.95383	-2.6361	0.0107234	0.789221
ENSG00000141101	-0.339064	3.99778	-2.63413	0.010779	0.789221
ENSG00000229191	-1.08155	-0.528481	-2.63381	0.0107881	0.789221
ENSG00000251733	-1.04682	0.326244	-2.63353	0.010796	0.789221
ENSG00000179218	-0.387215	7.15906	-2.63227	0.0108316	0.789221
ENSG00000267361	1.03068	1.48411	2.63201	0.010839	0.789221
ENSG00000236073	-0.803038	0.480166	-2.63163	0.01085	0.789221
ENSG00000262500	-1.35197	-1.30613	-2.63045	0.0108837	0.789221
ENSG00000157423	0.489476	5.82505	2.63377	0.0109567	0.789221
ENSG00000019505	-1.44961	0.381728	-2.62683	0.0109874	0.789221
ENSG00000236854	0.668247	3.85162	2.6279	0.0109875	0.789221
ENSG00000237641	0.944427	-1.76874	2.62933	0.0110175	0.789221
ENSG00000266227	1.90882	-1.14631	2.62473	0.0110491	0.789221
ENSG00000229221	-0.934638	-0.820223	-2.62326	0.0110942	0.789221
ENSG00000129824	-0.36176	1.30042	-2.62419	0.0111073	0.789221
ENSG00000231738	1.05112	0.301579	2.62532	0.0111729	0.789221
ENSG00000124588	0.255858	4.87904	2.62023	0.0111792	0.789221
ENSG00000164344	-0.552641	2.49958	-2.61577	0.0113102	0.789221
ENSG00000214688	0.968395	0.388149	2.61316	0.0113878	0.789221
ENSG00000200959	-0.883251	2.54581	-2.61311	0.0114058	0.789221
ENSG00000204287	-0.956077	2.96117	-2.61016	0.0114779	0.789221
ENSG00000119138	0.664625	5.45964	2.60991	0.0114886	0.789221
ENSG00000140254	0.672402	1.03419	2.60834	0.0115321	0.789221
ENSG00000127463	-0.189291	5.58455	-2.6078	0.0115483	0.789221
ENSG00000257720	1.36358	-2.67389	2.60728	0.0115707	0.789221
ENSG00000172748	-0.364704	4.33408	-2.60591	0.0116054	0.789221
ENSG00000169926	0.365847	6.42061	2.60201	0.0117239	0.789221
ENSG00000237479	1.60278	-2.53858	2.60146	0.0117408	0.789221
ENSG00000166006	-1.63496	-0.870007	-2.60118	0.011766	0.789221
ENSG00000272695	1.0686	-2.14683	2.60031	0.0117761	0.789221
ENSG00000234187	-0.563069	1.96809	-2.59914	0.0118137	0.789221
ENSG00000283506	-1.09666	-2.54347	-2.5987	0.0118257	0.789221
ENSG00000111665	-0.595879	0.268319	-2.59929	0.0118265	0.789221
ENSG00000223923	1.62175	-0.76419	2.59911	0.0118265	0.789221
ENSG00000285791	0.598767	1.50988	2.59961	0.011827	0.789221
ENSG00000196104	-0.3308	7.01143	-2.59829	0.0118382	0.789221
ENSG00000144026	-0.299364	6.69101	-2.60143	0.0118592	0.789221
ENSG00000147570	1.38217	-2.70838	2.59629	0.0119002	0.789221
ENSG00000223760	1.38363	-3.33448	2.59598	0.0119097	0.789221
ENSG00000111752	-0.266056	4.61011	-2.59507	0.0120106	0.789221
ENSG00000253341	-1.01196	-0.288247	-2.59275	0.0120141	0.789221
ENSG00000198157	0.655976	3.66358	2.59501	0.0120512	0.789221
ENSG00000228507	-1.17715	-2.30364	-2.59139	0.0120526	0.789221
ENSG00000230184	-0.836307	-0.287197	-2.59167	0.0120674	0.789221
ENSG00000269038	0.465728	1.08642	2.58874	0.0121362	0.789221
ENSG00000144199	0.306931	3.95292	2.58722	0.012184	0.789221
ENSG00000102362	0.692973	4.58172	2.58594	0.0122246	0.789221
ENSG00000168757	1.57817	-2.8611	2.58616	0.0122568	0.789221
ENSG00000144868	-0.507027	4.00829	-2.58452	0.0122713	0.789221
ENSG00000262919	0.583139	3.41031	2.58443	0.0122949	0.789221
ENSG00000150394	-0.409195	4.43129	-2.58331	0.0123084	0.789221
ENSG00000264653	-0.443355	2.13377	-2.58329	0.0123091	0.789221
ENSG00000229330	-0.503777	1.31545	-2.5816	0.0123631	0.789221
ENSG00000201448	-0.843529	3.29285	-2.5807	0.0124073	0.789221
ENSG00000238078	1.17989	-2.23395	2.58008	0.0124121	0.789221
ENSG00000236120	-1.15603	-0.4726	-2.57935	0.0124365	0.789221
ENSG00000171804	1.65965	0.981802	2.57941	0.01244	0.789221
ENSG00000118407	0.462897	2.61181	2.57904	0.0124454	0.789221
ENSG00000244510	-1.11271	-2.42171	-2.57866	0.0124824	0.789221
ENSG00000260197	0.846255	-1.82284	2.57798	0.0125249	0.789221
ENSG00000279165	1.91367	0.277785	2.57623	0.012537	0.789221
ENSG00000285079	-1.5268	-2.43608	-2.57493	0.0125787	0.789221
ENSG00000231232	1.57621	-3.25881	2.57442	0.0125957	0.789221
ENSG00000152315	-0.947893	-0.886976	-2.57507	0.0126108	0.789221
ENSG00000090013	0.519495	1.30554	2.57456	0.0126276	0.789221
ENSG00000162676	0.957216	-0.910079	2.57337	0.0126297	0.789221
ENSG00000106089	-0.374048	2.39302	-2.57269	0.0126561	0.789221
ENSG00000118402	-0.693771	1.31905	-2.57218	0.0126806	0.789221
ENSG00000030419	0.430789	5.82555	2.57131	0.0127013	0.789221
ENSG00000215218	-0.777685	0.603534	-2.57079	0.0127172	0.789221
ENSG00000267213	0.7328	0.607269	2.5706	0.0127206	0.789221
ENSG00000281903	-0.77736	-0.264834	-2.5706	0.0127217	0.789221
ENSG00000173208	-0.56363	1.90073	-2.56886	0.0127842	0.789221
ENSG00000279932	1.17	-1.86257	2.5655	0.0128895	0.789221
ENSG00000118689	0.246598	6.18607	2.56543	0.0128919	0.789221
ENSG00000067955	0.279745	6.12355	2.56469	0.0129163	0.789221
ENSG00000267500	1.18986	-2.95039	2.56426	0.012934	0.789221
ENSG00000188517	-0.613657	1.40052	-2.56288	0.012977	0.789221
ENSG00000269356	-0.749235	2.59366	-2.56377	0.0129939	0.789221
ENSG00000165660	-0.290589	3.4555	-2.56224	0.0129984	0.789221
ENSG00000226763	0.392507	3.37251	2.56403	0.0130275	0.789221
ENSG00000260398	0.859216	-1.20166	2.56037	0.0130614	0.789221
ENSG00000184277	-0.254036	4.74068	-2.56011	0.0130701	0.789221
ENSG00000082701	-0.178716	6.3319	-2.55986	0.0130787	0.789221
ENSG00000173391	-1.10018	3.92575	-2.56197	0.0130941	0.789221
ENSG00000151655	-1.37241	-0.570725	-2.55909	0.0131045	0.789221
ENSG00000113361	-0.48902	3.07997	-2.55901	0.0131072	0.789221
ENSG00000186716	0.369987	6.34374	2.56063	0.0131112	0.789221
ENSG00000244218	-0.893133	-1.10381	-2.55876	0.0131206	0.789221
ENSG00000082482	-1.05714	0.188007	-2.5584	0.0131514	0.789221
ENSG00000156642	-0.343365	4.68434	-2.55746	0.0131597	0.789221
ENSG00000253522	-1.43614	-1.03094	-2.55709	0.0131724	0.789221
ENSG00000251450	-0.582979	0.912493	-2.55606	0.0132221	0.789221
ENSG00000171450	-1.18195	-0.257603	-2.55574	0.013224	0.789221
ENSG00000249784	-0.689074	1.917	-2.55504	0.0132432	0.789221
ENSG00000267246	-1.11227	-0.772401	-2.55491	0.0132515	0.789221
ENSG00000274718	-1.07587	-1.57091	-2.55426	0.0132704	0.789221
ENSG00000226970	-1.20249	-2.52743	-2.55377	0.0132858	0.789221
ENSG00000165792	-0.25939	5.15559	-2.55402	0.0133227	0.789221
ENSG00000234073	-1.16015	-0.962957	-2.55089	0.013395	0.789221
ENSG00000072858	-0.840483	1.28555	-2.5494	0.0134361	0.789221
ENSG00000207493	-0.991311	2.26646	-2.54916	0.0134443	0.789221
ENSG00000213073	0.430928	2.12983	2.54944	0.0134882	0.789221
ENSG00000179295	0.323338	7.23413	2.5471	0.0135156	0.789221
ENSG00000264268	-0.922548	0.0664343	-2.54768	0.0135237	0.789221
ENSG00000134072	-0.536419	2.44057	-2.54658	0.0135475	0.789221
ENSG00000174450	2.1626	2.84668	2.54442	0.0136103	0.789221
ENSG00000167912	-1.16491	-1.33471	-2.54435	0.0136119	0.789221
ENSG00000220305	-0.394456	2.74767	-2.54385	0.0136294	0.789221
ENSG00000222020	0.53309	1.02817	2.54326	0.0136602	0.789221
ENSG00000257167	0.567462	0.545898	2.54205	0.0136925	0.789221
ENSG00000115274	-1.06991	-0.851379	-2.54173	0.0137039	0.789221
ENSG00000264044	0.890957	-0.266577	2.53953	0.0137814	0.789221
ENSG00000071242	0.277444	7.39017	2.53908	0.0137974	0.789221
ENSG00000274383	1.19098	0.38393	2.53836	0.0138305	0.789221
ENSG00000107566	-0.258502	3.75997	-2.53777	0.013844	0.789221
ENSG00000280287	0.328447	5.5052	2.53743	0.0138559	0.789221
ENSG00000041353	-0.929533	0.506797	-2.53769	0.0139245	0.789221
ENSG00000180440	-1.43999	-1.90296	-2.53499	0.013943	0.789221
ENSG00000122257	0.268324	7.26279	2.53433	0.0139666	0.789221
ENSG00000279829	-0.99501	-1.68614	-2.53364	0.013995	0.789221
ENSG00000126709	-0.610415	2.58047	-2.53279	0.0140457	0.789221
ENSG00000237004	-0.415355	1.86276	-2.53073	0.014096	0.789221
ENSG00000267023	0.789043	-0.665525	2.52905	0.0141568	0.789221
ENSG00000172361	0.424728	4.37405	2.52813	0.0141902	0.789221
ENSG00000249381	1.30904	-3.22265	2.52906	0.0142174	0.789221
ENSG00000054219	-1.04791	-0.839034	-2.52724	0.0142226	0.789221
ENSG00000176894	0.708169	0.105416	2.52807	0.0142294	0.789221
ENSG00000011600	-0.87344	1.66464	-2.527	0.0142318	0.789221
ENSG00000254963	1.07071	-2.51784	2.52538	0.0142907	0.789221
ENSG00000227717	2.36155	-0.0124122	2.52407	0.0143387	0.789221
ENSG00000257624	-0.922213	-0.405743	-2.52306	0.0143762	0.789221
ENSG00000187912	-1.25758	0.247757	-2.52248	0.0143969	0.789221
ENSG00000169313	-1.36653	2.03923	-2.52228	0.0144086	0.789221
ENSG00000232828	-0.651448	0.183836	-2.52226	0.0144182	0.789221
ENSG00000237711	-0.832872	-0.807205	-2.5185	0.0145442	0.789221
ENSG00000135686	0.194975	5.31496	2.51695	0.014602	0.789221
ENSG00000212283	-0.814767	6.88952	-2.516	0.0146374	0.789221
ENSG00000197322	-0.965534	-1.50468	-2.51636	0.0146407	0.789221
ENSG00000141429	-0.258486	4.38659	-2.51554	0.0146545	0.789221
ENSG00000133019	-0.983432	0.519206	-2.51481	0.0146818	0.789221
ENSG00000166246	0.793751	-0.543046	2.51464	0.0146883	0.789221
ENSG00000087253	-0.459979	4.80688	-2.51431	0.0147268	0.789221
ENSG00000095585	-0.997477	4.0142	-2.51219	0.0147806	0.789221
ENSG00000230590	-0.185011	8.1693	-2.51183	0.0147939	0.789221
ENSG00000135824	-0.991265	1.28888	-2.51209	0.0147977	0.789221
ENSG00000122861	-1.05808	0.711936	-2.51049	0.0148446	0.789221
ENSG00000146151	-0.781563	1.2479	-2.51018	0.0148666	0.789221
ENSG00000217060	1.34374	-2.89242	2.50986	0.0148685	0.789221
ENSG00000241756	-0.982791	-1.71369	-2.50918	0.0148943	0.789221
ENSG00000254496	1.38517	-3.455	2.50846	0.0149216	0.789221
ENSG00000183036	-0.679384	0.569	-2.50936	0.0149229	0.789221
ENSG00000145050	-0.488566	2.92667	-2.50775	0.0149488	0.789221
ENSG00000260012	-0.962505	-2.08954	-2.50724	0.014968	0.789221
ENSG00000271386	-1.30473	-2.09441	-2.50695	0.0149792	0.789221
ENSG00000232912	1.11644	-1.63923	2.50648	0.0149972	0.789221
ENSG00000186340	-0.41146	6.60472	-2.50658	0.0150001	0.789221
ENSG00000276216	-1.11944	-1.0635	-2.50557	0.0150318	0.789221
ENSG00000166573	-0.703501	3.08287	-2.50702	0.0150547	0.789221
ENSG00000231507	-0.930525	-1.45348	-2.50524	0.0150569	0.789221
ENSG00000204764	-0.385944	4.77962	-2.50482	0.0150606	0.789221
ENSG00000138101	-0.256352	7.55077	-2.50827	0.0150853	0.789221
ENSG00000256812	-0.827628	1.91814	-2.50404	0.0150951	0.789221
ENSG00000200757	-1.22614	-1.46251	-2.50422	0.0151195	0.789221
ENSG00000117523	0.288778	10.2456	2.50103	0.0152068	0.792321
ENSG00000232306	1.15211	-1.8834	2.49756	0.0153415	0.797871
ENSG00000261786	-0.324154	5.59582	-2.50338	0.0154011	0.798239
ENSG00000249485	-0.393596	3.86483	-2.49594	0.0154049	0.798239
ENSG00000231340	0.841849	-1.0567	2.49537	0.0154356	0.798368
ENSG00000230701	0.446382	3.76739	2.49382	0.0154878	0.798636
ENSG00000175806	-0.393974	5.28786	-2.49359	0.0154971	0.798636
ENSG00000198018	0.357262	1.71023	2.49006	0.0156366	0.798706
ENSG00000221926	-0.257886	3.88389	-2.4894	0.0156626	0.798706
ENSG00000182487	-1.15652	-0.146924	-2.4883	0.0157445	0.798706
ENSG00000200913	-0.874961	4.47177	-2.48598	0.0157993	0.798706
ENSG00000248527	0.990265	4.51467	2.48415	0.0158727	0.798706
ENSG00000279440	1.30428	0.0286358	2.48393	0.0158838	0.798706
ENSG00000253719	0.208074	5.14375	2.48383	0.0158855	0.798706
ENSG00000275443	1.3307	-2.89257	2.48296	0.0159204	0.798706
ENSG00000198108	-0.700402	1.21519	-2.48205	0.0159572	0.798706
ENSG00000205542	-0.556876	5.11731	-2.48186	0.0159649	0.798706
ENSG00000103375	1.12435	-2.32349	2.49021	0.0159848	0.798706
ENSG00000176593	0.237529	6.35709	2.47962	0.0160558	0.798706
ENSG00000121966	-0.980314	1.68853	-2.47957	0.0160849	0.798706
ENSG00000137807	-1.05736	-0.693293	-2.48052	0.0160905	0.798706
ENSG00000144744	-0.193919	5.06724	-2.47815	0.0161155	0.798706
ENSG00000148680	-1.32871	-1.3886	-2.47735	0.0161496	0.798706
ENSG00000102096	-0.630283	0.603246	-2.4765	0.016187	0.798706
ENSG00000278685	0.835486	-0.0608258	2.47634	0.0161897	0.798706
ENSG00000166986	-0.210921	6.37706	-2.47516	0.0162378	0.798706
ENSG00000255503	0.991357	-2.40989	2.47507	0.0162415	0.798706
ENSG00000221887	-0.526153	1.46219	-2.47733	0.0162955	0.798706
ENSG00000152556	-0.40001	4.53661	-2.47205	0.0163689	0.798706
ENSG00000226125	-1.26609	-1.94188	-2.47048	0.0164362	0.798706
ENSG00000165898	0.303615	2.49828	2.46964	0.016466	0.798706
ENSG00000246214	-0.611944	-0.0606988	-2.46958	0.0164685	0.798706
ENSG00000258640	-0.657709	0.283628	-2.46876	0.0165025	0.798706
ENSG00000084754	-0.180767	6.05382	-2.46917	0.0165279	0.798706
ENSG00000275981	-1.12292	-2.92271	-2.46723	0.0165664	0.798706
ENSG00000169228	0.502427	2.20149	2.46726	0.0165777	0.798706
ENSG00000227544	-0.480027	4.34228	-2.46695	0.0165994	0.798706
ENSG00000258647	-1.12002	-1.58446	-2.46626	0.0166069	0.798706
ENSG00000278233	-1.70348	-1.32255	-2.4624	0.0167911	0.798706
ENSG00000198734	0.825126	0.345231	2.46703	0.0168087	0.798706
ENSG00000132964	-0.289576	4.36278	-2.46112	0.0168236	0.798706
ENSG00000071246	-0.289006	7.29321	-2.46085	0.0168349	0.798706
ENSG00000123908	0.207982	8.36963	2.45946	0.0168941	0.798706
ENSG00000138449	-0.700764	1.68775	-2.45926	0.0169064	0.798706
ENSG00000164244	-0.252359	4.24585	-2.45876	0.016924	0.798706
ENSG00000183122	1.64596	-2.69844	2.46036	0.0169934	0.798706
ENSG00000227745	-1.31014	-1.11993	-2.45712	0.0169939	0.798706
ENSG00000147164	-0.35911	2.77921	-2.4567	0.0170118	0.798706
ENSG00000204386	-0.310309	3.44791	-2.45669	0.0170122	0.798706
ENSG00000214875	0.781096	-1.01282	2.45643	0.0170232	0.798706
ENSG00000118298	-0.456738	4.67332	-2.45686	0.0170541	0.798706
ENSG00000272008	0.642629	0.939879	2.45549	0.0170637	0.798706
ENSG00000267924	-1.4652	-2.44425	-2.45457	0.0171269	0.798706
ENSG00000237821	1.48278	-2.5896	2.45724	0.0172126	0.798706
ENSG00000239002	-0.919443	-0.10601	-2.45176	0.0172246	0.798706
ENSG00000203601	1.07531	-2.74616	2.4619	0.0172428	0.798706
ENSG00000163344	-0.327551	3.34635	-2.45138	0.0172531	0.798706
ENSG00000267388	1.13455	-2.4871	2.45104	0.0172564	0.798706
ENSG00000231616	0.978713	-1.96797	2.45067	0.0172715	0.798706
ENSG00000170571	-0.918173	1.09843	-2.44812	0.0173827	0.798706
ENSG00000280434	0.580472	2.25741	2.44768	0.0174018	0.798706
ENSG00000116711	-1.05975	1.87544	-2.44745	0.0174133	0.798706
ENSG00000251652	-0.944369	-1.1083	-2.44739	0.0174144	0.798706
ENSG00000251031	-1.08896	-2.98003	-2.45104	0.017422	0.798706
ENSG00000233850	0.576119	1.59383	2.447	0.0174317	0.798706
ENSG00000096060	0.893284	6.68344	2.44691	0.0174361	0.798706
ENSG00000241743	-1.13929	-0.972577	-2.4466	0.017449	0.798706
ENSG00000185825	-0.323534	3.6705	-2.44672	0.0174493	0.798706
ENSG00000150893	-0.753541	2.21371	-2.44568	0.0174896	0.798706
ENSG00000281593	0.90795	-1.48322	2.44511	0.017517	0.798706
ENSG00000132535	-0.216245	5.45339	-2.45301	0.0175375	0.798706
ENSG00000140416	0.394088	6.0836	2.44956	0.0176406	0.798706
ENSG00000148634	-0.18296	6.94319	-2.44213	0.017646	0.798706
ENSG00000205464	-0.2864	5.24897	-2.44203	0.0176504	0.798706
ENSG00000226377	1.20919	-2.46228	2.44204	0.0176559	0.798706
ENSG00000258197	-0.857222	0.538051	-2.44185	0.0176584	0.798706
ENSG00000184117	-0.255904	3.56846	-2.44216	0.017665	0.798706
ENSG00000157404	-0.882687	2.64251	-2.44192	0.0176778	0.798706
ENSG00000197019	-1.12942	-0.900226	-2.44045	0.0177204	0.798706
ENSG00000285641	-1.08233	-1.43501	-2.43942	0.0177752	0.798706
ENSG00000144182	0.398841	2.11466	2.43824	0.0178186	0.798706
ENSG00000231163	1.18307	-3.56486	2.43753	0.0178502	0.798706
ENSG00000158423	0.444317	1.82558	2.43654	0.0178988	0.798706
ENSG00000105894	-0.340651	5.67972	-2.43601	0.0179185	0.798706
ENSG00000131697	-0.209872	5.47728	-2.43589	0.0179242	0.798706
ENSG00000254003	0.685006	-0.708074	2.43511	0.0179589	0.798706
ENSG00000138587	0.515941	4.0164	2.43472	0.0179764	0.798706
ENSG00000165973	-1.21137	0.570096	-2.43463	0.0179806	0.798706
ENSG00000122574	-1.20537	1.63714	-2.43409	0.0180258	0.798706
ENSG00000064651	-0.291627	8.00996	-2.43296	0.0180561	0.798706
ENSG00000279568	-1.28828	-2.03628	-2.43286	0.0180601	0.798706
ENSG00000238015	-1.10428	-2.04496	-2.43325	0.018075	0.798706
ENSG00000279549	0.500225	1.50884	2.43246	0.0180784	0.798706
ENSG00000138135	-1.4696	0.929794	-2.43231	0.0180853	0.798706
ENSG00000240048	-1.13218	-3.35128	-2.43286	0.018088	0.798706
ENSG00000112640	-0.205098	3.95128	-2.43908	0.0181265	0.798706
ENSG00000257008	1.3025	-2.94528	2.42948	0.0182137	0.798706
ENSG00000141013	0.246165	6.28215	2.42932	0.0182206	0.798706
ENSG00000167657	0.230584	5.54536	2.42913	0.0182293	0.798706
ENSG00000198826	0.490177	1.88711	2.42901	0.018235	0.798706
ENSG00000252230	0.797882	-1.4188	2.4276	0.0182992	0.798706
ENSG00000212539	-0.753637	-0.630608	-2.42726	0.0183219	0.798706
ENSG00000173757	0.158912	6.30597	2.42694	0.0183293	0.798706
ENSG00000242252	0.897381	-1.3218	2.42586	0.0183798	0.798706
ENSG00000141543	-0.389272	3.87714	-2.42562	0.01839	0.798706
ENSG00000222960	-0.980482	-2.31564	-2.42639	0.0184432	0.798706
ENSG00000237797	-0.945822	-0.464861	-2.42297	0.0185122	0.798706
ENSG00000174123	-0.982901	1.58098	-2.42025	0.0186387	0.798706
ENSG00000184515	-0.775866	0.94325	-2.42102	0.0186553	0.798706
ENSG00000264880	0.916073	0.0978196	2.41973	0.0186811	0.798706
ENSG00000132970	-0.210644	5.44864	-2.41974	0.0186977	0.798706
ENSG00000230733	0.890511	-1.2647	2.41709	0.0187854	0.798706
ENSG00000172716	-0.732893	3.01466	-2.41921	0.0188028	0.798706
ENSG00000134198	-1.09664	-1.73204	-2.41606	0.0188355	0.798706
ENSG00000225163	-1.0458	-2.05407	-2.41534	0.0188673	0.798706
ENSG00000133103	-0.213627	5.05325	-2.41486	0.0188901	0.798706
ENSG00000239151	-0.904634	-1.93964	-2.41332	0.018963	0.798706
ENSG00000272631	0.48501	1.08781	2.41362	0.0190333	0.798706
ENSG00000221464	-0.998425	-1.91734	-2.41134	0.0190562	0.798706
ENSG00000285627	1.24914	-2.60871	2.41128	0.0190611	0.798706
ENSG00000228939	-0.430645	1.60169	-2.41118	0.019064	0.798706
ENSG00000223724	0.914534	-1.76824	2.41069	0.0190869	0.798706
ENSG00000259408	-0.515614	1.39274	-2.41062	0.0190911	0.798706
ENSG00000249363	-0.779496	0.430834	-2.40956	0.0191408	0.798706
ENSG00000279407	-0.405083	2.40685	-2.40933	0.0191518	0.798706
ENSG00000260005	-1.01673	0.928228	-2.40929	0.0191534	0.798706
ENSG00000240929	1.08677	-3.41565	2.40805	0.019213	0.798706
ENSG00000167645	-0.258457	3.66775	-2.40674	0.0192752	0.798706
ENSG00000163293	-1.23028	-1.80091	-2.40656	0.0192842	0.798706
ENSG00000001630	-0.610169	2.41863	-2.4057	0.0193252	0.798706
ENSG00000226254	-1.06986	-1.76464	-2.40552	0.0193452	0.798706
ENSG00000180096	0.647161	0.759791	2.40477	0.0193699	0.798706
ENSG00000233430	1.14042	-3.25757	2.4048	0.0193752	0.798706
ENSG00000267504	-1.09619	-1.46201	-2.40425	0.019399	0.798706
ENSG00000117479	-0.51334	1.95467	-2.40449	0.0194097	0.798706
ENSG00000261407	-1.07228	-2.9265	-2.40368	0.0194226	0.798706
ENSG00000214114	1.01311	-1.6405	2.4034	0.0194359	0.798706
ENSG00000128311	0.395564	3.28494	2.40286	0.0194618	0.798706
ENSG00000274917	1.55879	-0.253568	2.40117	0.019544	0.798706
ENSG00000140678	-0.839155	5.95651	-2.40114	0.0195451	0.798706
ENSG00000084628	-2.22065	1.11889	-2.39922	0.019642	0.798706
ENSG00000273361	-1.05469	-2.18486	-2.39833	0.0196824	0.798706
ENSG00000207061	-1.16122	-2.26363	-2.39832	0.0196825	0.798706
ENSG00000198786	0.818445	8.26129	2.3975	0.0197226	0.798706
ENSG00000236882	0.608094	2.16737	2.40108	0.0197471	0.798706
ENSG00000272995	0.914445	-1.89612	2.39678	0.0197577	0.798706
ENSG00000150594	-1.21041	-0.896126	-2.39638	0.0197802	0.798706
ENSG00000272927	-0.684116	0.296636	-2.39613	0.0197894	0.798706
ENSG00000170523	-1.32133	-0.646171	-2.39581	0.0198139	0.798706
ENSG00000125898	-1.04237	-0.935751	-2.39522	0.0198343	0.798706
ENSG00000186197	1.32353	-0.421122	2.39472	0.0199091	0.798706
ENSG00000156030	0.236891	6.62	2.39283	0.0199522	0.798706
ENSG00000137714	0.326482	2.79878	2.39266	0.0199604	0.798706
ENSG00000089199	-1.06817	3.14979	-2.39277	0.0199641	0.798706
ENSG00000117592	-0.297899	3.24187	-2.39065	0.02006	0.798706
ENSG00000231064	-0.873729	1.90105	-2.39066	0.0200622	0.798706
ENSG00000215018	-0.439325	4.17261	-2.3901	0.0200874	0.798706
ENSG00000283281	-0.967536	-1.74324	-2.39031	0.0201141	0.798706
ENSG00000273855	-1.08791	-1.87069	-2.3871	0.0202536	0.798706
ENSG00000259209	-0.797204	-0.291961	-2.3866	0.0202618	0.798706
ENSG00000162591	0.406928	2.8085	2.38869	0.020301	0.798706
ENSG00000200480	-1.11901	-1.70064	-2.38472	0.0203562	0.798706
ENSG00000223982	-1.10393	-2.72985	-2.38322	0.0204376	0.798706
ENSG00000271911	-0.880959	-0.570495	-2.38274	0.020459	0.798706
ENSG00000279785	1.32967	-2.844	2.38238	0.020474	0.798706
ENSG00000136193	0.185319	5.97401	2.38155	0.0205163	0.798706
ENSG00000165244	0.536711	0.914109	2.38117	0.0205352	0.798706
ENSG00000132744	-1.468	1.01135	-2.38105	0.0205412	0.798706
ENSG00000143858	-0.885371	1.5903	-2.38125	0.0205464	0.798706
ENSG00000104812	0.219957	5.19492	2.38627	0.0205838	0.798706
ENSG00000152580	-1.08367	2.54636	-2.38179	0.0206034	0.798706
ENSG00000187950	-1.01867	-1.12377	-2.37963	0.0206133	0.798706
ENSG00000089159	0.24688	5.1617	2.3821	0.0207023	0.798706
ENSG00000267898	1.0114	-2.87892	2.37751	0.0207374	0.798706
ENSG00000067715	-1.07217	4.1164	-2.37475	0.0208796	0.798706
ENSG00000234741	-0.776616	7.05652	-2.3726	0.0209739	0.798706
ENSG00000163644	0.28935	6.23332	2.37373	0.0209848	0.798706
ENSG00000277632	-1.94436	-0.8992	-2.37177	0.0210169	0.798706
ENSG00000247624	0.462508	1.51122	2.37064	0.0210754	0.798706
ENSG00000116741	-0.93399	2.20783	-2.37114	0.0210772	0.798706
ENSG00000266019	-0.463405	7.32332	-2.37043	0.0210865	0.798706
ENSG00000177839	0.397927	1.90923	2.36981	0.0211304	0.798706
ENSG00000051108	-0.370328	5.2782	-2.36973	0.0211323	0.798706
ENSG00000171303	-1.11176	-0.6392	-2.36915	0.0211542	0.798706
ENSG00000146070	-1.09366	0.459088	-2.36934	0.0211753	0.798706
ENSG00000173867	0.932224	-1.25576	2.3674	0.0212489	0.798706
ENSG00000279649	0.27011	4.25255	2.36715	0.0212572	0.798706
ENSG00000182575	-0.735833	0.497355	-2.36613	0.0213106	0.798706
ENSG00000283914	-0.888874	0.965445	-2.36611	0.0213116	0.798706
ENSG00000280327	-0.676954	-0.30444	-2.36582	0.0213266	0.798706
ENSG00000162062	-0.906646	-0.513226	-2.36535	0.0213515	0.798706
ENSG00000094914	-0.274182	5.4712	-2.36507	0.0213661	0.798706
ENSG00000138115	-0.799812	0.207109	-2.36501	0.0213696	0.798706
ENSG00000172782	-1.04945	-2.06375	-2.3645	0.0213965	0.798706
ENSG00000065600	-0.25415	5.90242	-2.36447	0.0213978	0.798706
ENSG00000197651	1.93923	0.267793	2.3645	0.0214438	0.798706
ENSG00000011347	-1.30581	1.20549	-2.36361	0.0214627	0.798706
ENSG00000185697	0.289675	4.36378	2.36309	0.0214704	0.798706
ENSG00000285600	0.535276	1.10461	2.3625	0.0215014	0.798706
ENSG00000267121	-0.739557	2.39008	-2.36224	0.0215153	0.798706
ENSG00000108262	0.252812	6.23658	2.36047	0.0216089	0.798706
ENSG00000279995	-0.773207	-0.448006	-2.3597	0.02165	0.798706
ENSG00000202314	-0.855159	-0.255184	-2.36041	0.0216951	0.798706
ENSG00000137252	-1.26637	-2.95212	-2.35818	0.0217304	0.798706
ENSG00000229243	1.31057	-2.90699	2.35751	0.0217662	0.798706
ENSG00000230734	-0.689726	0.168852	-2.35737	0.0217802	0.798706
ENSG00000159658	0.158486	5.77199	2.35798	0.021785	0.798706
ENSG00000140939	0.3666	4.47269	2.35708	0.0217894	0.798706
ENSG00000277130	0.574966	-0.116173	2.35682	0.0218032	0.798706
ENSG00000236963	-0.901951	3.12648	-2.35669	0.0218101	0.798706
ENSG00000230847	-2.35282	2.74179	-2.35643	0.0218242	0.798706
ENSG00000164304	0.995593	-1.15304	2.3562	0.0218364	0.798706
ENSG00000147588	-0.321694	5.69491	-2.36055	0.021901	0.798706
ENSG00000227803	-1.0326	-1.75761	-2.35443	0.0219314	0.798706
ENSG00000224957	-0.510216	1.44869	-2.35416	0.0219461	0.798706
ENSG00000198125	1.18787	-3.73241	2.35343	0.0219854	0.798706
ENSG00000129493	-0.227634	4.72355	-2.35334	0.0219902	0.798706
ENSG00000259905	-0.787634	6.52852	-2.35304	0.0220109	0.798706
ENSG00000286146	1.72682	-2.04816	2.35222	0.0220507	0.798706
ENSG00000155252	0.281073	3.34165	2.352	0.0220622	0.798706
ENSG00000270477	-1.06308	2.24658	-2.35086	0.0221274	0.798706
ENSG00000106789	0.914673	0.188721	2.3504	0.0221489	0.798706
ENSG00000169612	-0.792692	0.577342	-2.3512	0.0221644	0.798706
ENSG00000231544	0.85961	-1.86676	2.3495	0.0221978	0.798706
ENSG00000218537	1.43702	-0.491029	2.3495	0.0221979	0.798706
ENSG00000212186	1.7437	-2.42478	2.34791	0.0222846	0.798706
ENSG00000201457	-0.889266	5.07214	-2.34752	0.0223058	0.798706
ENSG00000154640	0.394675	2.84096	2.34727	0.0223195	0.798706
ENSG00000182931	0.932358	-2.71436	2.34705	0.0223315	0.798706
ENSG00000124743	0.628962	0.602394	2.34674	0.0223495	0.798706
ENSG00000241395	-0.425206	1.59971	-2.34659	0.0223571	0.798706
ENSG00000156313	0.348346	5.64968	2.34649	0.0223621	0.798706
ENSG00000078053	-0.484937	4.22667	-2.34571	0.0224089	0.798706
ENSG00000250602	-0.980406	-1.57572	-2.34533	0.0224253	0.798706
ENSG00000279834	-1.02794	-1.57429	-2.34374	0.022513	0.798706
ENSG00000258215	-1.16534	-2.4508	-2.34191	0.022624	0.798706
ENSG00000104081	-0.603724	2.16371	-2.34052	0.0226948	0.798706
ENSG00000105323	0.184882	6.54058	2.34019	0.0227087	0.798706
ENSG00000259755	-0.637842	-0.229547	-2.34001	0.0227186	0.798706
ENSG00000269899	-0.982001	-1.10776	-2.34043	0.0227249	0.798706
ENSG00000286179	-1.3506	-0.338929	-2.34053	0.0227345	0.798706
ENSG00000180287	-0.328099	3.95187	-2.33927	0.02276	0.798706
ENSG00000172006	0.273065	3.78243	2.33921	0.0227633	0.798706
ENSG00000164465	-0.356867	3.96641	-2.33759	0.0228536	0.798706
ENSG00000105784	-0.806753	0.803789	-2.33719	0.0228882	0.798706
ENSG00000165695	0.406837	1.59191	2.3367	0.0229491	0.798706
ENSG00000242258	-1.57461	0.222974	-2.33463	0.0230191	0.798706
ENSG00000185974	-1.14869	-1.40742	-2.33649	0.0230511	0.798706
ENSG00000231131	-0.887638	1.35048	-2.33493	0.0230545	0.798706
ENSG00000135632	-0.265144	4.09213	-2.33444	0.0230607	0.798706
ENSG00000170049	-0.423404	2.89023	-2.3347	0.0230755	0.798706
ENSG00000196092	1.15727	-2.02245	2.33292	0.023115	0.798706
ENSG00000277342	0.692108	-0.388957	2.33256	0.0231355	0.798706
ENSG00000278791	1.48278	-2.93882	2.33237	0.0231463	0.798706
ENSG00000266531	-0.831171	-0.860663	-2.33239	0.0231563	0.798706
ENSG00000235271	-0.646456	-0.0423205	-2.33209	0.0231622	0.798706
ENSG00000216471	-0.641348	0.577639	-2.33201	0.0231709	0.798706
ENSG00000200354	-0.938097	3.94873	-2.33152	0.0231939	0.798706
ENSG00000170629	-0.399802	3.00794	-2.33165	0.0231988	0.798706
ENSG00000185989	0.2826	7.15659	2.33321	0.0232283	0.798706
ENSG00000251276	1.29305	-3.01338	2.3304	0.0232578	0.798706
ENSG00000244405	-0.363423	5.3006	-2.33001	0.0232798	0.798706
ENSG00000175548	0.370761	3.394	2.32961	0.0233023	0.798706
ENSG00000248318	1.25866	-3.40011	2.32953	0.0233066	0.798706
ENSG00000110042	-0.5923	7.5571	-2.32948	0.0233099	0.798706
ENSG00000227598	-0.725699	-0.191021	-2.32999	0.0233249	0.798706
ENSG00000171812	-0.557598	1.4339	-2.32909	0.0233317	0.798706
ENSG00000248714	0.634632	2.24777	2.32921	0.023332	0.798706
ENSG00000279124	1.17981	1.20325	2.3289	0.0233425	0.798706
ENSG00000264943	1.49876	2.07921	2.32851	0.0233649	0.798706
ENSG00000261663	-0.756413	-0.462561	-2.32828	0.023378	0.798706
ENSG00000136783	-0.436831	2.79544	-2.32704	0.0234577	0.798706
ENSG00000153064	-0.992815	0.277966	-2.32788	0.023471	0.798706
ENSG00000208772	-0.527569	6.16022	-2.32653	0.0234777	0.798706
ENSG00000256150	-0.588613	0.808407	-2.32646	0.0234814	0.798706
ENSG00000256870	-1.36241	-2.43708	-2.32636	0.0234972	0.798706
ENSG00000207031	-1.11066	1.75496	-2.32602	0.0235069	0.798706
ENSG00000139679	-0.999002	3.59759	-2.32576	0.0235266	0.798706
ENSG00000159173	1.18713	-3.25636	2.32516	0.023556	0.798706
ENSG00000114405	0.353175	2.11585	2.32438	0.0236005	0.798706
ENSG00000147872	0.369675	2.7706	2.32451	0.0236473	0.798706
ENSG00000180957	-0.18578	5.3754	-2.32344	0.0236546	0.798706
ENSG00000183454	-1.05176	4.28097	-2.32347	0.0236855	0.798706
ENSG00000175262	-1.24933	-2.29078	-2.32252	0.0237078	0.798706
ENSG00000274628	-1.07349	-0.48702	-2.3223	0.0237204	0.798706
ENSG00000188176	1.132	-3.05268	2.32214	0.0237297	0.798706
ENSG00000196428	-0.17467	6.03422	-2.32203	0.0237357	0.798706
ENSG00000207109	-0.831596	-1.72051	-2.32157	0.0237626	0.798706
ENSG00000271400	-1.14679	-0.940359	-2.32126	0.0237801	0.798706
ENSG00000277400	-0.899416	-0.668605	-2.32177	0.0237819	0.798706
ENSG00000230813	1.73816	-1.01638	2.32037	0.0238424	0.798706
ENSG00000174607	-0.278908	7.73735	-2.31914	0.0239258	0.798706
ENSG00000206885	-0.86316	4.45665	-2.31832	0.0239507	0.798706
ENSG00000112320	-0.178877	6.2564	-2.31786	0.0239776	0.798706
ENSG00000214147	1.20545	-2.82452	2.31666	0.0240474	0.798706
ENSG00000235408	-0.721535	3.70582	-2.31383	0.0242132	0.798706
ENSG00000115687	-0.233679	3.83821	-2.31368	0.024222	0.798706
ENSG00000228594	-0.948845	-0.770547	-2.31404	0.0242366	0.798706
ENSG00000131711	0.26927	9.50484	2.31311	0.0242555	0.798706
ENSG00000181817	0.308731	2.64822	2.31309	0.0242566	0.798706
ENSG00000207313	-0.687998	1.93234	-2.3126	0.0242852	0.798706
ENSG00000284428	0.399434	4.15483	2.31253	0.0242892	0.798706
ENSG00000157703	-0.778296	0.0550335	-2.31188	0.0243277	0.798706
ENSG00000236008	-0.798659	1.12051	-2.31173	0.0243363	0.798706
ENSG00000237289	-1.14504	0.498503	-2.31077	0.0243945	0.798706
ENSG00000212607	-0.77505	4.21792	-2.31038	0.0244161	0.798706
ENSG00000174898	1.2244	-2.96459	2.31031	0.0244204	0.798706
ENSG00000163701	0.727717	-0.0508148	2.31028	0.0244225	0.798706
ENSG00000280927	0.720824	-0.80915	2.30944	0.0244723	0.798706
ENSG00000270441	0.441055	1.34328	2.30907	0.0244937	0.798706
ENSG00000169896	-0.653515	4.36148	-2.30888	0.0245052	0.798706
ENSG00000068745	-0.14988	6.13812	-2.31399	0.0245211	0.798706
ENSG00000130055	-0.853408	1.08718	-2.30868	0.0245352	0.798706
ENSG00000278700	-0.748593	-0.0301305	-2.30816	0.0245671	0.798706
ENSG00000204428	-0.734457	0.706261	-2.30667	0.0246737	0.798706
ENSG00000268529	-1.01085	-1.433	-2.30588	0.0246839	0.798706
ENSG00000121989	-0.284524	3.4058	-2.30613	0.0246851	0.798706
ENSG00000166979	0.37112	5.40415	2.30559	0.0247009	0.798706
ENSG00000112902	-0.359156	6.45857	-2.30514	0.0247282	0.798706
ENSG00000284196	-0.771144	-0.106701	-2.30503	0.0247348	0.798706
ENSG00000224003	-0.598611	2.46354	-2.30648	0.024754	0.798706
ENSG00000206762	1.1361	-2.0246	2.30444	0.0247701	0.798706
ENSG00000280087	-0.83724	-1.19514	-2.30497	0.0247763	0.798706
ENSG00000135324	-1.00141	-1.26518	-2.30455	0.0247837	0.798706
ENSG00000163106	-1.23655	-0.0255898	-2.30377	0.024835	0.798706
ENSG00000204054	0.292377	5.43328	2.30181	0.0249279	0.798706
ENSG00000140522	-0.70439	0.00423549	-2.30186	0.0249318	0.798706
ENSG00000049759	-0.449076	5.56022	-2.30155	0.0249466	0.798706
ENSG00000279812	-0.917046	-2.25332	-2.30115	0.0249694	0.798706
ENSG00000112290	-0.21518	5.69063	-2.30072	0.0249934	0.798706
ENSG00000171606	0.233989	5.85375	2.30462	0.0250194	0.798706
ENSG00000104870	-0.481579	4.21197	-2.30007	0.0250328	0.798706
ENSG00000167414	-0.565154	0.701034	-2.29989	0.025044	0.798706
ENSG00000143870	-0.284042	5.10883	-2.29955	0.0250644	0.798706
ENSG00000251448	0.95907	-0.949143	2.29964	0.0250664	0.798706
ENSG00000206903	-0.974395	0.303386	-2.29956	0.0250679	0.798706
ENSG00000102043	-0.366766	1.82789	-2.29901	0.0250972	0.798706
ENSG00000280367	0.651243	1.61961	2.29927	0.0251249	0.798706
ENSG00000259738	1.06503	-2.7183	2.30177	0.025125	0.798706
ENSG00000132821	-1.44553	0.0392249	-2.29852	0.0251268	0.798706
ENSG00000001084	0.335774	6.31322	2.29824	0.0251442	0.798706
ENSG00000199733	-0.923958	-2.62682	-2.29889	0.0251502	0.798706
ENSG00000224945	-0.569057	2.20152	-2.2982	0.0251502	0.798706
ENSG00000196436	1.00008	1.50224	2.29811	0.0251519	0.798706
ENSG00000267248	0.395703	1.99849	2.29755	0.025186	0.798706
ENSG00000214189	0.539175	1.70679	2.29731	0.0252001	0.798706
ENSG00000185065	0.710956	0.226532	2.29713	0.0252114	0.798706
ENSG00000155307	-1.05364	2.58418	-2.29688	0.0252276	0.798706
ENSG00000120280	-1.12832	0.616078	-2.2967	0.0252388	0.798706
ENSG00000107105	-0.986728	0.922968	-2.29592	0.0252857	0.798706
ENSG00000187957	-0.278786	6.40313	-2.30598	0.02531	0.798706
ENSG00000267905	0.734756	-0.159648	2.295	0.0253413	0.798706
ENSG00000207351	1.11077	-3.38212	2.29499	0.0253425	0.798706
ENSG00000197057	0.653732	1.00083	2.29497	0.0253429	0.798706
ENSG00000131781	0.59771	4.46338	2.29515	0.0253452	0.798706
ENSG00000183856	-1.23567	-0.992304	-2.29461	0.0253714	0.798706
ENSG00000224159	1.19656	-3.46716	2.2945	0.0253719	0.798706
ENSG00000235711	-1.15136	-1.8575	-2.29397	0.0254268	0.798706
ENSG00000183576	-0.153077	5.71368	-2.30414	0.0254526	0.798706
ENSG00000269350	1.35304	-2.87599	2.29452	0.0254673	0.798706
ENSG00000273682	0.75082	-0.34762	2.29284	0.0254738	0.798706
ENSG00000182901	-0.473909	4.08516	-2.29276	0.0255022	0.798713
ENSG00000130287	-0.706751	4.46834	-2.29136	0.0255784	0.799762
ENSG00000172460	-0.655907	0.0134996	-2.29022	0.0256724	0.799762
ENSG00000131791	0.244665	5.00862	2.28877	0.0257245	0.799762
ENSG00000120049	-0.33504	3.50122	-2.28789	0.025779	0.799762
ENSG00000215835	-0.919823	-1.01633	-2.28822	0.025803	0.799762
ENSG00000204472	-0.863032	2.11813	-2.28616	0.0258867	0.799762
ENSG00000158195	0.170527	6.68793	2.28751	0.0260496	0.799762
ENSG00000255314	0.870612	-1.42976	2.28299	0.0260846	0.799762
ENSG00000125885	0.274651	3.03908	2.2828	0.026097	0.799762
ENSG00000276023	-0.80509	-0.587633	-2.28278	0.0260981	0.799762
ENSG00000279030	-1.13778	-2.51135	-2.28272	0.0261016	0.799762
ENSG00000104549	-0.32959	5.04804	-2.28235	0.0261294	0.799762
ENSG00000259544	1.00091	-1.46396	2.28131	0.0261905	0.799762
ENSG00000136908	-0.359299	3.53875	-2.28085	0.0262212	0.799762
ENSG00000258650	-0.649044	0.145846	-2.28059	0.0262357	0.799762
ENSG00000168830	-1.25854	-2.97739	-2.28011	0.026266	0.799762
ENSG00000212907	0.999606	5.54036	2.28003	0.026271	0.799762
ENSG00000185523	-0.993244	-1.80283	-2.27977	0.0262874	0.799762
ENSG00000259943	0.289469	3.59612	2.27943	0.026317	0.799762
ENSG00000127561	-0.805581	0.48081	-2.28021	0.0263261	0.799762
ENSG00000081189	-0.713641	5.68892	-2.28017	0.026335	0.799762
ENSG00000142192	-0.24645	9.38722	-2.27873	0.0263531	0.799762
ENSG00000187243	-0.990844	-1.61512	-2.27876	0.026362	0.799762
ENSG00000259461	1.71774	-0.946317	2.27805	0.0263962	0.799762
ENSG00000273321	-0.665334	0.433245	-2.27775	0.026434	0.799762
ENSG00000115652	-0.259973	4.33641	-2.27729	0.0264448	0.799762
ENSG00000132530	-0.683652	5.29089	-2.27909	0.0265229	0.799762
ENSG00000279858	0.958188	-2.55644	2.27505	0.0265874	0.799762
ENSG00000251474	0.182996	6.12829	2.27393	0.0266584	0.799762
ENSG00000250186	0.922819	-1.68255	2.27377	0.0266686	0.799762
ENSG00000166845	-0.317709	4.51967	-2.2726	0.0267439	0.799762
ENSG00000185495	0.28528	3.59427	2.27678	0.0267946	0.799762
ENSG00000147813	-0.425046	2.10924	-2.27152	0.0268128	0.799762
ENSG00000182185	-0.286989	5.09461	-2.27146	0.026817	0.799762
ENSG00000255595	-1.1231	-2.72892	-2.27121	0.0268328	0.799762
ENSG00000262481	0.992479	-1.64986	2.27115	0.0268367	0.799762
ENSG00000196071	-0.91125	0.922922	-2.27069	0.0268666	0.799762
ENSG00000072042	-0.215997	4.78211	-2.27054	0.0268762	0.799762
ENSG00000207181	-0.869473	6.12746	-2.27033	0.02689	0.799762
ENSG00000199712	-1.04332	-2.96286	-2.26982	0.0269227	0.799762
ENSG00000223685	-0.692823	0.17366	-2.26951	0.0269423	0.799762
ENSG00000230635	-1.17943	-1.04915	-2.26925	0.0269593	0.799762
ENSG00000106688	-0.688623	3.10866	-2.26836	0.027024	0.799762
ENSG00000267642	1.17492	-3.66701	2.26776	0.0270555	0.799762
ENSG00000199833	-1.08874	-2.72263	-2.26703	0.0271033	0.799762
ENSG00000233084	-1.01982	-1.96709	-2.26653	0.0271355	0.799762
ENSG00000091140	-0.232877	4.43354	-2.26616	0.0271598	0.799762
ENSG00000171204	-0.302264	3.00757	-2.2659	0.0271768	0.799762
ENSG00000199266	-0.781403	5.23297	-2.26552	0.0272012	0.799762
ENSG00000157064	-0.516251	2.78856	-2.2656	0.0272081	0.799762
ENSG00000164885	-0.268471	2.19386	-2.26774	0.0272385	0.799762
ENSG00000285656	1.14052	-3.03801	2.26467	0.0272565	0.799762
ENSG00000100003	0.253562	5.14923	2.26434	0.0272778	0.799762
ENSG00000285918	0.948196	-2.42384	2.26425	0.027284	0.799762
ENSG00000179083	0.462209	2.75775	2.26347	0.0273347	0.799762
ENSG00000253919	-1.06865	-1.92012	-2.26343	0.0273373	0.799762
ENSG00000255794	-0.752573	-0.00979273	-2.26261	0.0273913	0.799762
ENSG00000126217	-0.298687	8.83894	-2.26241	0.0274046	0.799762
ENSG00000103121	-0.257828	4.43896	-2.26316	0.0274319	0.799762
ENSG00000145743	-0.215586	4.51803	-2.26039	0.0275367	0.799762
ENSG00000140557	-1.28325	-2.82035	-2.26214	0.0275465	0.799762
ENSG00000170633	-0.236258	5.94458	-2.25947	0.0275977	0.799762
ENSG00000286109	-0.831264	-0.0896465	-2.25885	0.0276387	0.799762
ENSG00000240489	0.817819	-0.393043	2.25854	0.0276589	0.799762
ENSG00000117448	-0.202965	4.67871	-2.25811	0.027687	0.799762
ENSG00000213355	1.10428	-1.47231	2.25709	0.0277574	0.799762
ENSG00000112041	1.02175	-2.16519	2.25603	0.0278321	0.799762
ENSG00000181381	-0.575282	4.62507	-2.25605	0.0278373	0.799762
ENSG00000263218	1.19209	-3.08606	2.25597	0.0278567	0.799762
ENSG00000198763	0.831691	7.40492	2.25484	0.0279042	0.799762
ENSG00000257668	1.59792	-1.94217	2.25475	0.0279102	0.799762
ENSG00000220685	-0.861966	-2.15709	-2.25397	0.0279625	0.799762
ENSG00000117616	-0.357375	8.64434	-2.25382	0.0279724	0.799762
ENSG00000039319	-0.377998	9.26687	-2.25371	0.0279793	0.799762
ENSG00000122224	1.20858	-1.72121	2.25322	0.0280126	0.799762
ENSG00000095383	0.395199	6.59782	2.25374	0.0280444	0.799762
ENSG00000177464	1.00059	-0.708473	2.25211	0.0280909	0.799762
ENSG00000271714	0.780883	-0.710867	2.25179	0.0281079	0.799762
ENSG00000256420	-0.834275	-1.16977	-2.25212	0.0281301	0.799762
ENSG00000237806	1.78612	-0.540889	2.25136	0.0281382	0.799762
ENSG00000065989	-0.507084	2.74126	-2.25143	0.0281417	0.799762
ENSG00000278399	0.784927	-0.465761	2.25087	0.0281697	0.799762
ENSG00000270405	1.35498	-2.19411	2.25028	0.0282097	0.799762
ENSG00000137959	-0.805116	3.74547	-2.25261	0.0282106	0.799762
ENSG00000170291	-0.189312	4.10682	-2.24985	0.0282383	0.799762
ENSG00000213889	-0.818656	-0.0653759	-2.24947	0.0282641	0.799762
ENSG00000153551	-0.728621	1.62198	-2.24931	0.0282765	0.799762
ENSG00000133742	1.05979	-3.51101	2.24775	0.0283797	0.799762
ENSG00000105851	-0.814923	2.68104	-2.24718	0.0284302	0.799762
ENSG00000240404	1.36097	-2.74239	2.24698	0.028432	0.799762
ENSG00000272688	-0.779549	-0.269701	-2.24699	0.0284374	0.799762
ENSG00000221461	-1.02049	-3.32967	-2.24518	0.0285542	0.799762
ENSG00000245330	0.75818	-1.22072	2.24469	0.0285874	0.799762
ENSG00000141682	-1.24199	-2.38107	-2.24835	0.0286091	0.799762
ENSG00000253214	-1.052	-2.16475	-2.24445	0.0286102	0.799762
ENSG00000258651	0.874808	-1.41678	2.2443	0.0286141	0.799762
ENSG00000235701	-0.727014	-0.104632	-2.24408	0.0286448	0.799762
ENSG00000188269	1.48886	0.785725	2.24364	0.0286618	0.799762
ENSG00000172183	0.438862	3.36391	2.24256	0.0287326	0.799762
ENSG00000285454	-0.857156	-0.696251	-2.24239	0.028744	0.799762
ENSG00000169045	-0.217802	8.3724	-2.24202	0.0287693	0.799762
ENSG00000186994	0.72411	0.820549	2.24186	0.0287804	0.799762
ENSG00000181938	-0.60164	2.36304	-2.24184	0.028782	0.799762
ENSG00000143493	-0.192686	4.78568	-2.24167	0.0287936	0.799762
ENSG00000115590	1.66487	0.18621	2.2441	0.0287984	0.799762
ENSG00000102001	0.492004	1.36508	2.24129	0.0288194	0.799762
ENSG00000225521	1.02891	-0.801711	2.24103	0.0288374	0.799762
ENSG00000236674	1.01022	-2.72411	2.24036	0.0288831	0.799762
ENSG00000266313	0.887688	-1.42138	2.24008	0.0289023	0.799762
ENSG00000107551	0.321219	8.29581	2.2397	0.0289301	0.799762
ENSG00000227082	-0.713269	2.6755	-2.24089	0.0289913	0.799762
ENSG00000121895	-0.937607	2.0063	-2.23925	0.0289956	0.799762
ENSG00000281920	-0.76652	-1.01327	-2.23861	0.0290408	0.799762
ENSG00000285851	0.69395	0.238845	2.2379	0.0290537	0.799762
ENSG00000206755	-0.763834	-0.543992	-2.23807	0.0290633	0.799762
ENSG00000138190	-0.334648	4.18303	-2.24733	0.0290655	0.799762
ENSG00000253123	1.84774	-0.414577	2.23755	0.0290772	0.799762
ENSG00000152457	-0.250285	4.69227	-2.23726	0.0290967	0.799762
ENSG00000127951	-0.693778	3.42702	-2.23668	0.0291383	0.799762
ENSG00000258404	1.07427	-2.92458	2.23594	0.0291877	0.799762
ENSG00000169871	0.253254	5.95433	2.23589	0.0291912	0.799762
ENSG00000105929	-0.901884	0.403525	-2.23519	0.0292403	0.799762
ENSG00000280096	-1.34516	-1.2118	-2.23514	0.0292434	0.799762
ENSG00000260490	-1.06238	-2.14791	-2.23513	0.029244	0.799762
ENSG00000207088	-0.61279	4.19821	-2.23444	0.029292	0.799762
ENSG00000264810	-0.532858	0.970333	-2.23405	0.0293191	0.799762
ENSG00000275765	0.490849	1.39658	2.23404	0.0293229	0.799762
ENSG00000238741	-0.343491	7.30526	-2.23385	0.0293329	0.799762
ENSG00000175592	1.22541	-2.07925	2.24107	0.0293716	0.799762
ENSG00000171462	-1.01763	-0.88688	-2.23328	0.0293728	0.799762
ENSG00000111652	-0.199536	4.48738	-2.2332	0.0293784	0.799762
ENSG00000198876	0.208142	3.63276	2.23288	0.0294009	0.799762
ENSG00000258959	0.903433	-1.38986	2.23267	0.0294155	0.799762
ENSG00000069509	-0.38992	1.37175	-2.23263	0.0294309	0.799762
ENSG00000196199	0.203183	8.15197	2.23244	0.0294316	0.799762
ENSG00000133107	-0.853967	0.535858	-2.23217	0.0294504	0.799762
ENSG00000147869	-1.17516	-2.74414	-2.23173	0.0294811	0.799762
ENSG00000222607	1.19489	-3.00408	2.23177	0.0294849	0.799762
ENSG00000149150	0.42077	2.27036	2.23129	0.0295118	0.799762
ENSG00000151490	-0.711156	2.89685	-2.23117	0.0295218	0.799762
ENSG00000271907	-0.689937	5.27618	-2.23089	0.0295396	0.799762
ENSG00000227512	1.13862	-3.30991	2.23249	0.0296561	0.799762
ENSG00000235162	-0.916252	1.098	-2.22899	0.0296727	0.799762
ENSG00000180438	0.980128	-0.89651	2.22898	0.0296734	0.799762
ENSG00000180644	-0.959609	-0.761288	-2.22843	0.0297123	0.799762
ENSG00000127870	0.251704	5.06357	2.22809	0.0297364	0.799762
ENSG00000171421	0.435649	1.25055	2.22726	0.0298022	0.799762
ENSG00000172137	-1.08025	0.43327	-2.22727	0.0298243	0.799762
ENSG00000207475	-0.820511	6.16114	-2.22682	0.0298259	0.799762
ENSG00000077943	0.621811	3.108	2.22689	0.0298483	0.799762
ENSG00000167900	-0.851238	-0.671313	-2.22612	0.0298751	0.799762
ENSG00000115486	-0.178341	5.05299	-2.22587	0.0298929	0.799762
ENSG00000250896	-1.13325	-0.144659	-2.22549	0.0299197	0.799762
ENSG00000213782	-0.410378	1.44797	-2.22546	0.0299219	0.799762
ENSG00000182223	-0.989698	-1.36215	-2.22472	0.0299813	0.799762
ENSG00000232884	-1.01256	-0.414817	-2.22483	0.0299816	0.799762
ENSG00000260306	-0.720522	-0.900311	-2.22354	0.0300879	0.799762
ENSG00000262454	0.424393	2.11147	2.22329	0.0301111	0.799762
ENSG00000271737	0.736094	-0.401214	2.22441	0.0301239	0.799762
ENSG00000236496	-1.08229	-1.42747	-2.22137	0.0302202	0.799762
ENSG00000114439	0.191345	7.22321	2.22115	0.0302287	0.799762
ENSG00000116678	-0.454476	1.87892	-2.22107	0.0302363	0.799762
ENSG00000151503	-0.164618	5.36504	-2.22157	0.0302434	0.799762
ENSG00000279873	0.463879	0.979111	2.22062	0.0302728	0.799762
ENSG00000235448	1.42358	1.18565	2.21923	0.030379	0.799762
ENSG00000120738	-1.15385	2.61212	-2.21902	0.0303808	0.799762
ENSG00000286035	0.958806	-2.22356	2.21879	0.0304005	0.799762
ENSG00000110848	-1.13474	0.382902	-2.21872	0.030433	0.799762
ENSG00000172201	-0.725577	4.05401	-2.2181	0.0304583	0.799762
ENSG00000083444	0.311255	5.07155	2.21756	0.0304861	0.799762
ENSG00000274615	-0.808847	-0.54716	-2.2175	0.0304921	0.799762
ENSG00000125257	-0.713221	4.67946	-2.21724	0.0305137	0.799762
ENSG00000160014	-0.336613	5.5023	-2.21675	0.0305656	0.799762
ENSG00000270165	-0.700917	-0.338908	-2.21636	0.0305748	0.799762
ENSG00000230530	-0.548258	0.538979	-2.21618	0.0305859	0.799762
ENSG00000240505	1.56647	0.128916	2.21618	0.0305872	0.799762
ENSG00000174010	0.269393	3.24529	2.21612	0.03059	0.799762
ENSG00000207008	-0.718288	6.20058	-2.21537	0.0306444	0.799762
ENSG00000175701	0.534509	0.92775	2.21557	0.0306591	0.799762
ENSG00000130988	-0.603666	3.61698	-2.21393	0.0307481	0.799762
ENSG00000117600	-0.474215	2.91524	-2.21272	0.030836	0.799762
ENSG00000282728	-1.00204	-2.82475	-2.21239	0.0308601	0.799762
ENSG00000200169	-1.14693	-0.586159	-2.21168	0.030912	0.799762
ENSG00000284523	0.404688	1.46263	2.21162	0.0309161	0.799762
ENSG00000160602	-0.306555	2.13911	-2.21016	0.0310228	0.799762
ENSG00000151012	0.57856	4.65926	2.21015	0.0310235	0.799762
ENSG00000152784	-0.279581	4.34003	-2.21005	0.03104	0.799762
ENSG00000213131	-0.712433	0.992242	-2.20906	0.0311032	0.799762
ENSG00000265366	-0.985512	0.400448	-2.21005	0.0311049	0.799762
ENSG00000130723	0.141511	8.3639	2.21329	0.0311335	0.799762
ENSG00000205885	0.547347	2.12268	2.2098	0.0311444	0.799762
ENSG00000168824	-1.09313	0.748364	-2.20838	0.0311559	0.799762
ENSG00000236254	-0.818522	-0.908891	-2.20827	0.0311649	0.799762
ENSG00000153207	0.183023	6.63981	2.20793	0.0311865	0.799762
ENSG00000196338	-0.240273	5.99796	-2.20786	0.0311918	0.799762
ENSG00000230116	-0.989627	-2.21911	-2.20794	0.0311988	0.799762
ENSG00000277586	-0.883836	4.5259	-2.20771	0.0312065	0.799762
ENSG00000221439	0.619886	0.121168	2.21043	0.0312191	0.799762
ENSG00000111229	-0.314094	4.14518	-2.20767	0.0312348	0.799762
ENSG00000104435	-1.04314	1.4623	-2.20743	0.0312458	0.799762
ENSG00000251381	-1.19293	-1.55114	-2.20713	0.0312472	0.799762
ENSG00000243646	0.272947	2.74761	2.20687	0.0312643	0.799762
ENSG00000250514	-0.743156	-0.799431	-2.20647	0.031294	0.799762
ENSG00000273301	-1.33058	-1.14408	-2.20689	0.0313007	0.799762
ENSG00000086967	1.31407	-2.5663	2.20611	0.0313201	0.799762
ENSG00000103168	-0.213436	5.80385	-2.20569	0.031351	0.799816
ENSG00000262470	-0.894457	-0.845031	-2.20552	0.0313786	0.799816
ENSG00000196990	-1.15905	-1.5573	-2.20324	0.0315324	0.800367
ENSG00000138592	0.19036	6.85439	2.20323	0.0315329	0.800367
ENSG00000277494	0.505982	6.03119	2.20648	0.0315765	0.800367
ENSG00000212232	-0.417396	9.63405	-2.20209	0.0316175	0.800367
ENSG00000239577	0.926379	-1.95142	2.2023	0.0316417	0.800367
ENSG00000175084	1.31328	-2.00445	2.20154	0.0316587	0.800367
ENSG00000268093	0.470505	0.620024	2.20154	0.0316591	0.800367
ENSG00000213252	-0.745563	-0.637889	-2.20138	0.0316709	0.800367
ENSG00000125804	-0.942107	-0.211074	-2.20017	0.031761	0.800367
ENSG00000272831	0.382776	2.39657	2.19996	0.0317778	0.800367
ENSG00000273489	0.848062	-1.56843	2.19953	0.0318083	0.800367
ENSG00000074621	0.424355	3.72771	2.19933	0.0318235	0.800367
ENSG00000236907	1.21083	-3.61139	2.19906	0.0318438	0.800367
ENSG00000104381	-0.174338	6.13126	-2.19877	0.0318651	0.800367
ENSG00000229276	-0.773131	-0.933286	-2.1987	0.0318737	0.800367
ENSG00000162396	0.354225	1.36549	2.19826	0.0319039	0.800367
ENSG00000154274	-0.546761	1.56931	-2.19784	0.0319428	0.800367
ENSG00000201302	-0.920713	3.31373	-2.19715	0.0319868	0.800367
ENSG00000261394	1.36881	-1.71293	2.20159	0.0319906	0.800367
ENSG00000174032	-0.540875	1.42012	-2.1973	0.0319935	0.800367
ENSG00000156958	-0.173207	5.25824	-2.19692	0.0320038	0.800367
ENSG00000203356	-0.895095	-1.42154	-2.19655	0.0320318	0.800367
ENSG00000177301	-0.347107	5.88076	-2.19631	0.0320497	0.800367
ENSG00000170624	-0.300333	4.98778	-2.19542	0.0321235	0.801104
ENSG00000250938	-0.40964	1.64414	-2.19468	0.0321931	0.801104
ENSG00000167244	-1.15907	-1.70714	-2.19436	0.0321969	0.801104
ENSG00000161896	0.411534	5.48628	2.19328	0.0322789	0.801104
ENSG00000122335	-0.210551	5.47532	-2.19264	0.0323275	0.801104
ENSG00000223855	0.35199	2.3013	2.19251	0.0323369	0.801104
ENSG00000185650	-0.573166	6.4138	-2.19246	0.0323408	0.801104
ENSG00000168056	0.246056	7.50712	2.19221	0.0323597	0.801104
ENSG00000111358	-0.245005	3.87975	-2.19197	0.0323782	0.801104
ENSG00000267523	1.15875	-0.710249	2.1907	0.0324744	0.801104
ENSG00000131652	-0.32105	2.34349	-2.19063	0.0324799	0.801104
ENSG00000253939	1.25545	-2.01465	2.19071	0.0324844	0.801104
ENSG00000240767	-1.10297	-2.54274	-2.19077	0.0325214	0.801104
ENSG00000276234	-0.223351	4.69311	-2.18899	0.032605	0.801104
ENSG00000212128	-0.336921	3.08728	-2.18748	0.0327201	0.801104
ENSG00000183747	2.00863	-0.0891896	2.18669	0.0327811	0.801104
ENSG00000272447	-0.461382	1.89297	-2.18775	0.0328377	0.801104
ENSG00000101307	-0.730196	0.501767	-2.18557	0.0328668	0.801104
ENSG00000271581	-1.01238	-2.67567	-2.18595	0.0328731	0.801104
ENSG00000103154	-0.649156	1.14666	-2.18577	0.0328767	0.801104
ENSG00000189007	-0.313092	3.28227	-2.18481	0.0329257	0.801104
ENSG00000116747	0.232299	5.53107	2.18453	0.0329472	0.801104
ENSG00000134830	-1.09525	0.418663	-2.1845	0.0329496	0.801104
ENSG00000135069	-0.261506	4.74121	-2.18925	0.0329628	0.801104
ENSG00000168631	1.52185	-0.304758	2.18506	0.0330216	0.801104
ENSG00000105483	-0.349001	6.0193	-2.18329	0.0330562	0.801104
ENSG00000213070	1.24901	-2.4125	2.18282	0.0330794	0.801104
ENSG00000122390	0.20602	5.00933	2.18203	0.033155	0.801104
ENSG00000270720	-0.962717	-2.18263	-2.18218	0.0331578	0.801104
ENSG00000285162	0.838383	-1.73854	2.18179	0.0331589	0.801104
ENSG00000106605	-0.388637	2.0314	-2.18169	0.0331668	0.801104
ENSG00000064545	-0.23977	3.00239	-2.18134	0.0331938	0.801104
ENSG00000163563	-1.10832	1.43338	-2.1813	0.0332007	0.801104
ENSG00000134215	-0.701051	1.80231	-2.18104	0.0332171	0.801104
ENSG00000266217	-0.639726	1.25174	-2.18081	0.0332352	0.801104
ENSG00000233343	0.410593	1.55581	2.18027	0.0332771	0.801104
ENSG00000253988	-0.840094	0.959111	-2.18025	0.0332804	0.801104
ENSG00000160062	0.401918	1.93049	2.1791	0.0333682	0.801104
ENSG00000154582	0.241336	3.15102	2.17889	0.0333847	0.801104
ENSG00000265334	-0.929587	-1.98573	-2.17893	0.0333936	0.801104
ENSG00000135318	-0.505842	2.77204	-2.17923	0.0334054	0.801104
ENSG00000235619	-0.612922	0.266987	-2.17844	0.0334195	0.801104
ENSG00000224220	-0.766595	-0.62495	-2.17835	0.0334266	0.801104
ENSG00000279800	-0.705453	-0.773984	-2.17818	0.0334397	0.801104
ENSG00000280024	1.18807	-3.4332	2.17778	0.0334713	0.801104
ENSG00000257531	-0.55201	0.190569	-2.17796	0.0334892	0.801104
ENSG00000152127	-0.193904	7.48338	-2.18036	0.0335624	0.801104
ENSG00000274210	-1.07684	0.485152	-2.17624	0.0335912	0.801104
ENSG00000151834	-0.74259	0.802911	-2.17587	0.0336258	0.801104
ENSG00000204177	-0.353169	5.32742	-2.17519	0.0336739	0.801104
ENSG00000119973	1.04504	0.526403	2.17482	0.0337056	0.801104
ENSG00000172243	-0.903505	3.32028	-2.17415	0.0337554	0.801104
ENSG00000250730	1.17188	-3.92276	2.17403	0.0337653	0.801104
ENSG00000183762	0.36748	2.93155	2.17402	0.0337663	0.801104
ENSG00000266473	0.794401	-1.1214	2.17366	0.0337943	0.801104
ENSG00000249238	1.01686	-2.3071	2.17301	0.0338456	0.801104
ENSG00000199311	-1.34702	-0.390534	-2.17217	0.0339127	0.801104
ENSG00000261596	-0.419098	1.6434	-2.17188	0.0339345	0.801104
ENSG00000207523	-0.893824	6.10581	-2.17183	0.0339386	0.801104
ENSG00000132541	-0.426508	1.19219	-2.17178	0.0339427	0.801104
ENSG00000260290	-0.720714	-1.17199	-2.17179	0.0339455	0.801104
ENSG00000259931	-0.837561	-0.654854	-2.17166	0.0339522	0.801104
ENSG00000136111	-0.63521	4.4489	-2.17492	0.0339863	0.801104
ENSG00000164181	0.314081	4.31189	2.1709	0.0340121	0.801104
ENSG00000227785	-0.917564	0.31631	-2.17045	0.0340482	0.801104
ENSG00000278431	-0.953637	-2.49136	-2.17	0.0340835	0.801104
ENSG00000257890	0.565178	0.501526	2.1691	0.0341557	0.801104
ENSG00000170634	-0.197646	4.88334	-2.16897	0.0341653	0.801104
ENSG00000188483	-0.701932	1.17961	-2.16866	0.0341947	0.801104
ENSG00000206897	-0.970402	-1.78951	-2.16815	0.0342307	0.801104
ENSG00000254025	1.15425	-3.72109	2.17102	0.0342559	0.801104
ENSG00000254689	-0.657766	0.0555198	-2.16765	0.0342712	0.801104
ENSG00000186094	-0.422194	2.0798	-2.1676	0.0342791	0.801104
ENSG00000255874	0.828325	-1.00433	2.16742	0.0342989	0.801104
ENSG00000232437	-0.64343	-0.105855	-2.16723	0.0343258	0.801104
ENSG00000224781	-1.28993	-1.2905	-2.16654	0.0343593	0.801104
ENSG00000127530	1.26229	-0.158748	2.16646	0.0343917	0.801104
ENSG00000251143	0.364091	4.2647	2.16607	0.0343972	0.801104
ENSG00000163082	-0.842418	0.362152	-2.16593	0.0344085	0.801104
ENSG00000201950	-1.00618	-2.16544	-2.16552	0.0344408	0.801104
ENSG00000036565	-1.12864	-0.436439	-2.16628	0.0344603	0.801104
ENSG00000266094	-0.580401	2.70869	-2.16537	0.0344918	0.801104
ENSG00000275202	-0.916573	-1.97846	-2.16525	0.0344919	0.801104
ENSG00000092607	0.748221	-0.656751	2.16479	0.0344995	0.801104
ENSG00000265684	-0.826563	-1.05659	-2.16448	0.0345244	0.801104
ENSG00000077080	-0.888465	0.103952	-2.16405	0.0345589	0.801104
ENSG00000164733	-0.436848	6.57421	-2.16288	0.0346534	0.801104
ENSG00000176595	0.30746	4.90707	2.16264	0.0346725	0.801104
ENSG00000258474	-0.884011	-2.34635	-2.16216	0.0347115	0.801104
ENSG00000084093	0.212382	5.56043	2.16211	0.0347156	0.801104
ENSG00000253200	0.293491	2.78074	2.16188	0.0347342	0.801104
ENSG00000228496	-1.17346	-0.695721	-2.16162	0.0347548	0.801104
ENSG00000138035	-0.275414	6.49146	-2.16132	0.0347792	0.801104
ENSG00000173011	0.231091	5.35519	2.1607	0.0348292	0.801104
ENSG00000201622	-0.959463	-2.34941	-2.16051	0.0348443	0.801104
ENSG00000200674	1.07922	-2.22743	2.15957	0.0349206	0.801104
ENSG00000115233	-0.23394	4.24882	-2.15875	0.0349871	0.801104
ENSG00000129946	0.373264	5.70349	2.15875	0.0349877	0.801104
ENSG00000154065	-0.582998	1.72345	-2.15878	0.035005	0.801104
ENSG00000201772	-0.467223	3.031	-2.15817	0.0350343	0.801104
ENSG00000103549	0.226161	7.20091	2.15687	0.0351405	0.801104
ENSG00000242282	-0.326976	1.25846	-2.1575	0.0351878	0.801104
ENSG00000225778	0.876607	-1.77853	2.16026	0.035201	0.801104
ENSG00000228778	1.41215	-2.35949	2.15597	0.0352162	0.801104
ENSG00000018189	0.154073	7.72684	2.15693	0.0352391	0.801104
ENSG00000250222	0.488707	1.7195	2.1557	0.035242	0.801104
ENSG00000207931	-0.765536	-0.370239	-2.15558	0.035246	0.801104
ENSG00000197943	-0.612653	5.19851	-2.15634	0.035289	0.801104
ENSG00000213190	-0.411177	2.55115	-2.15505	0.0352905	0.801104
ENSG00000122679	-0.789585	2.11912	-2.15491	0.0353003	0.801104
ENSG00000168610	0.2232	6.7209	2.15449	0.035335	0.801104
ENSG00000274370	-0.975091	-2.64386	-2.15376	0.0353947	0.801104
ENSG00000188770	0.970926	-0.717066	2.15365	0.0354035	0.801104
ENSG00000273409	-0.971692	-0.930749	-2.15368	0.035416	0.801104
ENSG00000218749	1.06188	-3.37791	2.15308	0.0354509	0.801104
ENSG00000214960	-0.24866	3.5082	-2.15452	0.0354902	0.801104
ENSG00000243480	-1.17664	-2.40919	-2.15229	0.0355157	0.801104
ENSG00000159714	0.274962	2.75339	2.15226	0.035518	0.801104
ENSG00000276026	-0.665715	0.102399	-2.15138	0.0356242	0.801104
ENSG00000266643	-0.770009	-1.86929	-2.15074	0.0356435	0.801104
ENSG00000039068	-0.571223	4.41852	-2.15059	0.0356557	0.801104
ENSG00000101670	-0.876408	1.99704	-2.1503	0.0356796	0.801104
ENSG00000221241	-0.952723	-1.18424	-2.15013	0.0356935	0.801104
ENSG00000285016	0.898982	-0.903906	2.1496	0.0357374	0.801104
ENSG00000243094	-0.869611	-0.918707	-2.1497	0.0357742	0.801104
ENSG00000162298	-0.19233	5.43174	-2.15265	0.0357831	0.801104
ENSG00000166441	0.198218	4.47702	2.14903	0.035785	0.801104
ENSG00000225513	-0.967222	-1.58878	-2.14872	0.0358108	0.801104
ENSG00000100994	0.223317	6.39252	2.14819	0.0358545	0.801104
ENSG00000042493	-0.604805	2.22307	-2.14804	0.0358667	0.801104
ENSG00000086289	-0.390725	2.73825	-2.148	0.0358708	0.801104
ENSG00000205976	1.64857	0.523689	2.14786	0.0358866	0.801104
ENSG00000225210	0.915147	-1.32732	2.14679	0.0359706	0.801104
ENSG00000153179	-0.525671	2.0976	-2.14651	0.0360391	0.801104
ENSG00000162374	-0.625588	2.61289	-2.14569	0.0360705	0.801104
ENSG00000250842	-1.02785	-2.48385	-2.14534	0.0360995	0.801104
ENSG00000061337	0.797518	1.03656	2.14505	0.0361163	0.801104
ENSG00000082213	-0.262741	3.45689	-2.14436	0.0361965	0.801104
ENSG00000073969	-0.296782	4.02555	-2.14431	0.0362415	0.801104
ENSG00000216490	-0.978769	-0.740366	-2.14416	0.0362446	0.801104
ENSG00000231971	0.959783	-1.39622	2.1433	0.0362629	0.801104
ENSG00000261174	0.51142	1.48908	2.14323	0.0362685	0.801104
ENSG00000246477	-0.821914	-1.89092	-2.1432	0.0362712	0.801104
ENSG00000236555	1.01042	-1.49934	2.14317	0.0362731	0.801104
ENSG00000152592	1.27228	-2.36798	2.14308	0.0362806	0.801104
ENSG00000198840	0.798762	3.99883	2.14291	0.0362954	0.801104
ENSG00000237264	-0.938342	-1.48664	-2.14282	0.0363031	0.801104
ENSG00000106080	0.233611	3.60963	2.14261	0.0363206	0.801104
ENSG00000259571	0.486794	1.76854	2.14269	0.0363216	0.801104
ENSG00000200792	-0.80153	1.50239	-2.14224	0.0363518	0.801104
ENSG00000232568	-0.508648	0.162978	-2.14234	0.0363552	0.801104
ENSG00000253604	1.54511	-0.409851	2.14216	0.0363753	0.801104
ENSG00000272812	-0.561745	1.89479	-2.14157	0.0364081	0.801204
ENSG00000164236	0.880417	0.364956	2.14064	0.0364882	0.802345
ENSG00000264769	-0.967002	-1.89404	-2.14113	0.0366678	0.803844
ENSG00000197582	-1.38115	-1.73953	-2.13778	0.036728	0.803844
ENSG00000181450	0.183606	5.02382	2.13774	0.0367314	0.803844
ENSG00000280206	0.335063	4.32595	2.13772	0.0367327	0.803844
ENSG00000153044	-0.580915	-0.11252	-2.13901	0.0367606	0.803844
ENSG00000167476	-1.02785	-2.64851	-2.13645	0.0368409	0.803844
ENSG00000198888	0.72021	7.20093	2.13605	0.0368746	0.803844
ENSG00000139832	-0.71706	1.67614	-2.13555	0.0369352	0.803844
ENSG00000183023	-0.538152	5.32082	-2.13535	0.0369358	0.803844
ENSG00000246283	-0.880353	-1.82157	-2.13476	0.0369848	0.803844
ENSG00000247121	-0.325245	3.67069	-2.13455	0.037021	0.803844
ENSG00000216901	0.889071	1.01912	2.1339	0.0370712	0.803844
ENSG00000270894	-0.61485	0.222648	-2.13275	0.0371563	0.803844
ENSG00000114013	-0.84631	1.91232	-2.13301	0.0371614	0.803844
ENSG00000218052	0.602609	-0.191797	2.13273	0.0371902	0.803844
ENSG00000201943	-1.34786	-0.748261	-2.13207	0.0372309	0.803844
ENSG00000173540	-0.241022	3.53103	-2.13172	0.037245	0.803844
ENSG00000104765	0.248539	5.63894	2.13159	0.0372557	0.803844
ENSG00000188295	0.333358	2.08451	2.13135	0.0372762	0.803844
ENSG00000260479	0.467644	0.865164	2.13104	0.0373027	0.803844
ENSG00000136141	-0.486729	4.5183	-2.13126	0.0373393	0.803844
ENSG00000284292	0.631108	-0.380817	2.1306	0.037341	0.803844
ENSG00000205581	-0.237956	6.74505	-2.13037	0.0373605	0.803844
ENSG00000198863	-0.166391	5.04942	-2.1283	0.0375394	0.803844
ENSG00000214357	0.485612	2.54992	2.12832	0.0375515	0.803844
ENSG00000239382	0.315679	3.50831	2.12806	0.0375603	0.803844
ENSG00000173276	0.224946	4.2634	2.12798	0.0375665	0.803844
ENSG00000243171	0.961966	-3.26501	2.12794	0.0376051	0.803844
ENSG00000103319	0.38675	5.09119	2.12738	0.037624	0.803844
ENSG00000179583	-0.579521	5.78931	-2.1288	0.0376418	0.803844
ENSG00000225872	-0.574971	1.00762	-2.12718	0.0376558	0.803844
ENSG00000106034	-0.832213	3.70283	-2.12664	0.0376832	0.803844
ENSG00000174021	0.674025	0.764867	2.12642	0.0377118	0.803844
ENSG00000197093	-0.559524	2.51803	-2.12573	0.0377622	0.803844
ENSG00000274292	0.63445	0.0445975	2.12547	0.0377848	0.803844
ENSG00000120327	0.278376	2.93724	2.12542	0.0377883	0.803844
ENSG00000091127	-0.219538	5.13607	-2.1252	0.0378077	0.803844
ENSG00000070047	0.2098	7.77953	2.12516	0.0378116	0.803844
ENSG00000131398	-0.495417	3.72184	-2.12489	0.0378353	0.803844
ENSG00000268105	-0.983817	-1.05438	-2.12485	0.0378384	0.803844
ENSG00000077684	0.17387	5.49721	2.12472	0.0378493	0.803844
ENSG00000225465	-0.483906	2.00393	-2.12484	0.0378528	0.803844
ENSG00000285813	1.33259	1.04988	2.1263	0.0378817	0.803844
ENSG00000147255	0.51261	2.65793	2.12379	0.0379308	0.803844
ENSG00000188738	-0.568767	3.41818	-2.12343	0.0379621	0.803844
ENSG00000100629	0.301961	6.48639	2.12341	0.0379633	0.803844
ENSG00000275672	0.431206	2.30552	2.12302	0.0379976	0.803844
ENSG00000147874	0.185751	4.51663	2.12446	0.0380005	0.803844
ENSG00000182010	-0.886739	-0.314128	-2.12344	0.0380127	0.803844
ENSG00000227188	-0.925113	-0.295938	-2.12276	0.0380208	0.803844
ENSG00000100311	-0.606064	2.77082	-2.1226	0.038089	0.803844
ENSG00000286268	0.852846	-2.08393	2.12154	0.0381274	0.803844
ENSG00000279382	-0.918401	-1.35095	-2.12231	0.0381285	0.803844
ENSG00000250284	-1.16045	-2.48251	-2.1214	0.0381391	0.803844
ENSG00000183833	0.468235	1.67632	2.12077	0.0381949	0.803844
ENSG00000187608	-0.995726	-0.541733	-2.12068	0.0382167	0.803844
ENSG00000104980	-0.306799	5.72218	-2.12049	0.0382194	0.803844
ENSG00000236796	-0.652997	0.698921	-2.12057	0.038235	0.803844
ENSG00000283141	-0.383563	1.28556	-2.11965	0.0382933	0.803844
ENSG00000247137	0.257865	4.00978	2.11949	0.0383073	0.803844
ENSG00000186439	1.10518	-0.202359	2.11906	0.038345	0.803844
ENSG00000124422	0.173904	6.80298	2.11894	0.0383553	0.803844
ENSG00000232807	-0.927504	0.995927	-2.11876	0.0384544	0.803844
ENSG00000283444	0.837286	-2.13537	2.11746	0.0384871	0.803844
ENSG00000273976	1.90427	0.265593	2.11752	0.0384887	0.803844
ENSG00000237850	1.8666	-0.57285	2.11646	0.0385755	0.803844
ENSG00000248206	0.282479	2.90628	2.11533	0.0386749	0.803844
ENSG00000270411	1.19641	-3.47459	2.11528	0.0386787	0.803844
ENSG00000241962	-0.455387	0.725362	-2.11518	0.0386878	0.803844
ENSG00000116337	-0.213814	5.35591	-2.11477	0.038724	0.803844
ENSG00000181072	-1.43276	0.0336022	-2.11472	0.0387537	0.803844
ENSG00000285746	-1.10413	-2.52563	-2.11436	0.038761	0.803844
ENSG00000273188	1.00516	-2.46145	2.11707	0.0387973	0.803844
ENSG00000137831	0.344835	7.79989	2.11361	0.0388276	0.803844
ENSG00000229491	0.77818	-0.38025	2.11353	0.0388347	0.803844
ENSG00000255325	-0.884844	-1.16363	-2.11341	0.0388451	0.803844
ENSG00000063127	0.501332	0.92843	2.11337	0.0388488	0.803844
ENSG00000017260	-0.19914	6.63516	-2.11524	0.0388538	0.803844
ENSG00000228198	-0.817496	0.630097	-2.11307	0.0388755	0.803844
ENSG00000243224	0.793577	-0.098637	2.11356	0.0388852	0.803844
ENSG00000078070	0.166505	6.88803	2.11278	0.0389009	0.803844
ENSG00000250917	0.770824	-1.18693	2.11222	0.038951	0.803844
ENSG00000198695	0.716828	4.80608	2.1119	0.0389797	0.803844
ENSG00000229739	-0.370044	2.06161	-2.11137	0.0390271	0.803844
ENSG00000118508	-0.643081	0.524139	-2.11153	0.0390331	0.803844
ENSG00000233452	-0.368191	2.51763	-2.11103	0.0390586	0.803844
ENSG00000164116	-0.965066	2.38443	-2.11226	0.0390642	0.803844
ENSG00000224514	-1.04856	-2.82399	-2.11032	0.0391207	0.803844
ENSG00000063587	0.231309	4.41924	2.10921	0.0392204	0.803844
ENSG00000232314	-0.924796	-2.54084	-2.10902	0.0392377	0.803844
ENSG00000215301	-0.142111	7.93887	-2.10875	0.0393293	0.803844
ENSG00000274259	0.38683	1.19215	2.10784	0.0393438	0.803844
ENSG00000049167	-0.203509	3.91368	-2.10779	0.0393485	0.803844
ENSG00000186951	0.179775	5.47551	2.10755	0.0393694	0.803844
ENSG00000262075	-0.950357	-1.69495	-2.10814	0.0394047	0.803844
ENSG00000216307	-0.921161	-1.63264	-2.10673	0.0394441	0.803844
ENSG00000090612	0.190076	5.34509	2.11186	0.0394785	0.803844
ENSG00000132872	-1.0167	1.1598	-2.10617	0.0395018	0.803844
ENSG00000255737	0.599149	-0.598416	2.10634	0.0395042	0.803844
ENSG00000232004	-0.890056	-1.4561	-2.10626	0.0395114	0.803844
ENSG00000273243	-0.373439	1.11562	-2.10594	0.0395152	0.803844
ENSG00000213234	0.925874	-2.05009	2.10557	0.0395483	0.803844
ENSG00000149179	-0.205165	4.81543	-2.10397	0.0396936	0.803844
ENSG00000120616	-0.163316	6.15722	-2.10353	0.0397336	0.803844
ENSG00000206557	-0.90815	-0.838131	-2.10404	0.0397736	0.803844
ENSG00000235902	-0.936519	-2.23263	-2.10301	0.0397804	0.803844
ENSG00000136160	-0.784313	3.36641	-2.10291	0.0397894	0.803844
ENSG00000152348	-0.25819	3.2703	-2.10265	0.0398273	0.803844
ENSG00000232499	-0.394312	1.61627	-2.10261	0.0398461	0.803844
ENSG00000181019	-0.336188	1.94815	-2.10203	0.03987	0.803844
ENSG00000104823	0.260412	3.06029	2.10153	0.0399155	0.803844
ENSG00000100300	0.398887	1.86721	2.10132	0.039936	0.803844
ENSG00000223572	-0.898813	-0.0709399	-2.10128	0.039959	0.803844
ENSG00000214428	-1.07944	-1.828	-2.10109	0.0399926	0.803844
ENSG00000237194	-1.00764	-0.328013	-2.10045	0.0400137	0.803844
ENSG00000269926	0.960531	-1.73172	2.10067	0.0400644	0.803844
ENSG00000163626	0.22378	3.53686	2.09972	0.0400804	0.803844
ENSG00000064601	-0.206251	4.63044	-2.10635	0.0401109	0.803844
ENSG00000232140	1.08663	-3.76218	2.09922	0.0401265	0.803844
ENSG00000197779	-0.201511	5.66463	-2.09882	0.040163	0.803844
ENSG00000207863	-0.706598	-0.0531271	-2.09879	0.0401656	0.803844
ENSG00000285819	1.33181	-3.05217	2.09903	0.0401725	0.803844
ENSG00000267338	0.592145	0.442342	2.09868	0.0401756	0.803844
ENSG00000140015	-0.839862	0.726917	-2.09846	0.0402297	0.803844
ENSG00000101680	-0.740025	4.41194	-2.09805	0.04027	0.803844
ENSG00000185823	-0.668163	4.06664	-2.09668	0.040359	0.803844
ENSG00000279410	-0.453652	1.85524	-2.09572	0.0404485	0.803844
ENSG00000259645	-1.05324	-1.42515	-2.09637	0.0404528	0.803844
ENSG00000225101	-1.09927	-1.15136	-2.09558	0.0404814	0.803844
ENSG00000213390	0.321219	3.04079	2.09529	0.0404874	0.803844
ENSG00000234769	0.426364	0.474206	2.09495	0.0405186	0.803844
ENSG00000080200	0.352175	8.37699	2.09494	0.0405789	0.803844
ENSG00000226751	-1.01852	2.20111	-2.09407	0.0406073	0.803844
ENSG00000183638	0.897339	0.221406	2.09377	0.0406279	0.803844
ENSG00000184774	1.07321	-3.26715	2.09322	0.0406793	0.803844
ENSG00000130429	0.402138	1.6597	2.09282	0.0407161	0.803844
ENSG00000132376	0.215895	4.59758	2.0926	0.0407364	0.803844
ENSG00000272148	-0.801127	-1.09901	-2.09258	0.0407384	0.803844
ENSG00000177551	0.386915	2.08033	2.09233	0.0407848	0.803844
ENSG00000277865	1.74818	0.959309	2.09193	0.0408205	0.803844
ENSG00000203930	0.203484	8.68718	2.09162	0.0408278	0.803844
ENSG00000140548	-0.257894	4.48718	-2.09141	0.0408469	0.803844
ENSG00000166016	-0.277707	5.61368	-2.09081	0.0409032	0.803844
ENSG00000254325	-0.853438	-0.559559	-2.0906	0.0409469	0.803844
ENSG00000148841	0.421679	2.69792	2.08957	0.0410224	0.803844
ENSG00000171219	0.761493	0.65289	2.0894	0.0410347	0.803844
ENSG00000250387	-1.04578	-2.38867	-2.08892	0.0410789	0.803844
ENSG00000159961	1.27715	-1.52547	2.08876	0.041095	0.803844
ENSG00000115457	0.949051	-0.601031	2.08865	0.0411047	0.803844
ENSG00000271200	0.491343	1.1288	2.08836	0.041145	0.803844
ENSG00000130643	-0.926303	1.38564	-2.08813	0.0411534	0.803844
ENSG00000267459	-0.601991	0.194123	-2.08703	0.0412561	0.803844
ENSG00000244005	0.226555	3.98206	2.0923	0.0413057	0.803844
ENSG00000116001	-0.190569	7.04184	-2.08626	0.0413287	0.803844
ENSG00000224830	-0.919382	-1.43593	-2.0859	0.0413618	0.803844
ENSG00000078403	-0.154686	6.28545	-2.08572	0.0413788	0.803844
ENSG00000223787	-0.610016	-0.713765	-2.08571	0.0413798	0.803844
ENSG00000265487	-0.957801	-2.08674	-2.0856	0.0413905	0.803844
ENSG00000198886	0.785186	8.60514	2.08536	0.0414126	0.803844
ENSG00000171860	-0.97988	0.746985	-2.08579	0.0414174	0.803844
ENSG00000197106	-1.00596	1.45633	-2.08549	0.0414197	0.803844
ENSG00000259509	-1.02434	-2.81231	-2.08734	0.0414199	0.803844
ENSG00000279145	0.908813	-1.5836	2.08522	0.0414258	0.803844
ENSG00000272638	-0.762723	-0.303756	-2.08525	0.0414398	0.803844
ENSG00000231831	-0.887083	-2.49109	-2.08491	0.0414552	0.803844
ENSG00000267922	-0.504786	1.11033	-2.08491	0.0414554	0.803844
ENSG00000238721	-0.952913	-2.14366	-2.0846	0.0414851	0.803844
ENSG00000134602	-1.08769	-0.513716	-2.08462	0.0414897	0.803844
ENSG00000199476	0.832611	-1.79741	2.08454	0.0414905	0.803844
ENSG00000200741	-0.818049	0.110086	-2.08453	0.041491	0.803844
ENSG00000282742	-0.879846	-1.24977	-2.08427	0.0415157	0.803844
ENSG00000134986	-0.491549	2.44002	-2.08416	0.0415269	0.803844
ENSG00000022355	-0.766741	1.41584	-2.084	0.0415413	0.803844
ENSG00000239732	-1.03506	-1.79099	-2.08367	0.0415726	0.803844
ENSG00000264840	-0.901723	-2.4054	-2.08361	0.0415776	0.803844
ENSG00000183844	-0.947043	-1.43685	-2.0835	0.0415881	0.803844
ENSG00000250790	0.947984	-1.91593	2.0835	0.0415885	0.803844
ENSG00000160185	1.09771	-1.71806	2.08316	0.0416204	0.803844
ENSG00000145794	-0.24575	7.69712	-2.08518	0.0416564	0.803844
ENSG00000197629	-0.978243	2.00469	-2.08262	0.0416713	0.803844
ENSG00000244627	0.247924	5.43876	2.08218	0.0417171	0.803844
ENSG00000180758	0.855177	-1.01293	2.08213	0.041718	0.803844
ENSG00000223336	-0.998193	-0.927951	-2.08137	0.0417901	0.804686
ENSG00000272431	-0.809193	-0.964935	-2.08097	0.041828	0.804858
ENSG00000184979	-0.560738	1.50896	-2.08105	0.0418558	0.804858
ENSG00000125355	-0.390906	2.6291	-2.08148	0.041886	0.804893
ENSG00000120903	-1.05127	-1.46314	-2.08007	0.0419159	0.804922
ENSG00000136100	-0.161362	5.71246	-2.0796	0.0419582	0.805187
ENSG00000071462	-0.191969	4.8684	-2.07894	0.0420207	0.80543
ENSG00000117222	0.206486	5.26146	2.07902	0.0420372	0.80543
ENSG00000097096	-0.563667	0.607161	-2.07836	0.0420784	0.80543
ENSG00000173267	-0.751405	2.33246	-2.07844	0.0420858	0.80543
ENSG00000156150	-0.970499	-3.09877	-2.07963	0.0421129	0.80543
ENSG00000154764	-0.965154	0.146253	-2.07743	0.0421654	0.80589
ENSG00000108861	0.280955	4.71145	2.07678	0.0422272	0.806238
ENSG00000258422	0.951553	-2.0914	2.07664	0.0422404	0.806238
ENSG00000197429	0.230173	3.59226	2.07624	0.0422789	0.806249
ENSG00000177352	0.254537	3.03295	2.07493	0.0424045	0.806249
ENSG00000131828	0.188902	6.03486	2.07954	0.0424141	0.806249
ENSG00000156804	-0.247332	6.73719	-2.07483	0.0424143	0.806249
ENSG00000179091	-0.226462	3.61387	-2.0748	0.0424173	0.806249
ENSG00000201564	-0.820839	-1.02261	-2.07383	0.0425402	0.806249
ENSG00000231969	-0.39852	3.1791	-2.07352	0.0425407	0.806249
ENSG00000238886	-0.804312	-0.555887	-2.07335	0.0425568	0.806249
ENSG00000158623	-0.238915	3.8259	-2.07327	0.042565	0.806249
ENSG00000267544	1.07493	-3.07951	2.07324	0.0425671	0.806249
ENSG00000285106	0.397094	2.43588	2.07526	0.042576	0.806249
ENSG00000240344	-0.297309	3.33717	-2.07218	0.0426702	0.806249
ENSG00000097021	-0.229385	4.19805	-2.07188	0.0426986	0.806249
ENSG00000153485	0.476476	0.654963	2.07058	0.0428262	0.806249
ENSG00000143552	0.883401	-0.751152	2.07041	0.0428406	0.806249
ENSG00000254213	-1.00138	-2.26092	-2.0701	0.042871	0.806249
ENSG00000066629	0.259651	5.5238	2.0701	0.0428771	0.806249
ENSG00000258932	-0.967172	-1.41989	-2.07024	0.042883	0.806249
ENSG00000081692	0.217333	3.6726	2.06978	0.0429021	0.806249
ENSG00000108179	-0.321184	3.87215	-2.06919	0.0429591	0.806249
ENSG00000236472	0.848166	-2.57949	2.06876	0.0430009	0.806249
ENSG00000113580	-0.162782	6.31991	-2.06846	0.0430299	0.806249
ENSG00000173218	-0.620122	0.302601	-2.06803	0.0430722	0.806249
ENSG00000174307	0.332925	5.75437	2.06763	0.0431116	0.806249
ENSG00000271959	0.977956	-2.46298	2.06756	0.0431184	0.806249
ENSG00000266248	-0.405085	1.1021	-2.06688	0.0431839	0.806249
ENSG00000095627	-1.01862	-2.99109	-2.06696	0.0431996	0.806249
ENSG00000176597	-0.804472	3.22695	-2.0669	0.0432028	0.806249
ENSG00000243864	1.45677	-2.82274	2.06671	0.0432077	0.806249
ENSG00000188199	-0.921778	-1.68006	-2.06642	0.0432297	0.806249
ENSG00000229921	-1.61738	-0.165832	-2.06547	0.0433217	0.806249
ENSG00000280208	1.10177	1.37633	2.06534	0.0433346	0.806249
ENSG00000204978	1.13649	-2.00014	2.06531	0.043338	0.806249
ENSG00000205929	0.733227	-1.52614	2.06786	0.0433665	0.806249
ENSG00000231801	1.2639	-3.09506	2.06456	0.0434181	0.806249
ENSG00000197992	-1.15245	-0.139118	-2.06418	0.0434486	0.806249
ENSG00000231381	1.20998	-2.62717	2.06353	0.043512	0.806249
ENSG00000183878	-0.298776	3.26196	-2.06431	0.0435141	0.806249
ENSG00000198837	-0.159089	6.60215	-2.0633	0.0435348	0.806249
ENSG00000214812	-1.01199	-0.823934	-2.06316	0.0435485	0.806249
ENSG00000173230	0.359444	9.21714	2.06917	0.0435511	0.806249
ENSG00000259595	0.9061	-2.31956	2.06302	0.0435622	0.806249
ENSG00000176788	-0.476688	3.49609	-2.06283	0.0435976	0.806249
ENSG00000022277	-0.189482	5.0162	-2.06508	0.0436245	0.806249
ENSG00000184156	-0.473173	4.55128	-2.06225	0.0436543	0.806249
ENSG00000212464	-0.30363	6.32589	-2.06173	0.0436899	0.806249
ENSG00000238230	-0.667398	0.322758	-2.06159	0.0437035	0.806249
ENSG00000076554	0.36527	5.64858	2.06184	0.0437539	0.806249
ENSG00000185567	-0.723964	4.88039	-2.06025	0.0438356	0.806249
ENSG00000109158	-1.18734	-0.327058	-2.06	0.0438627	0.806249
ENSG00000247925	-0.844961	-1.6099	-2.05961	0.0438996	0.806249
ENSG00000136449	0.369937	2.84973	2.05895	0.0439806	0.806249
ENSG00000065609	-0.279802	5.03637	-2.05917	0.0440196	0.806249
ENSG00000238165	-0.775515	-0.00272936	-2.05735	0.0441236	0.806249
ENSG00000232298	-0.844424	-2.35491	-2.05733	0.0441247	0.806249
ENSG00000224177	1.03045	-3.8516	2.05731	0.0441267	0.806249
ENSG00000138399	-0.221348	4.79197	-2.05695	0.0441625	0.806249
ENSG00000250362	0.951675	-3.08258	2.05685	0.0441729	0.806249
ENSG00000258931	1.35038	-2.25568	2.06359	0.044174	0.806249
ENSG00000273756	1.73143	-0.30182	2.05602	0.0442561	0.806249
ENSG00000215297	-0.980061	-2.27482	-2.05563	0.0442947	0.806249
ENSG00000259848	0.882242	-1.10627	2.05528	0.0443298	0.806249
ENSG00000227189	-0.795003	0.0226873	-2.0546	0.0443972	0.806249
ENSG00000023445	0.82899	0.197228	2.05463	0.0444279	0.806249
ENSG00000171595	0.662889	-0.0986295	2.05414	0.0444432	0.806249
ENSG00000163630	-1.49353	0.409863	-2.05326	0.0445349	0.806249
ENSG00000206969	-0.885702	-2.54329	-2.05307	0.0445525	0.806249
ENSG00000264616	-0.554373	0.797867	-2.05288	0.0445697	0.806249
ENSG00000263934	-0.473776	8.85018	-2.05286	0.0445714	0.806249
ENSG00000250254	-0.757702	-0.405284	-2.05267	0.044591	0.806249
ENSG00000118972	1.13496	-3.25052	2.05284	0.0446045	0.806249
ENSG00000279693	-0.863811	-0.950205	-2.05147	0.0447156	0.806249
ENSG00000157322	-0.639304	0.933441	-2.05132	0.0447263	0.806249
ENSG00000223963	-0.916824	-1.42569	-2.05122	0.0447368	0.806249
ENSG00000184574	-0.660013	2.81861	-2.05061	0.0447977	0.806249
ENSG00000165322	-0.314922	6.8321	-2.05029	0.0448304	0.806249
ENSG00000255284	0.258918	2.9677	2.05007	0.0448519	0.806249
ENSG00000266320	-0.722349	-0.671602	-2.05003	0.0448564	0.806249
ENSG00000239462	0.861623	-1.57956	2.04927	0.0449328	0.806249
ENSG00000237321	-0.419437	3.96382	-2.05308	0.0449386	0.806249
ENSG00000214093	-0.455733	0.271337	-2.0487	0.0449903	0.806249
ENSG00000196227	0.183866	5.39329	2.04835	0.0450262	0.806249
ENSG00000170558	-0.190096	5.02713	-2.04805	0.045056	0.806249
ENSG00000215030	-0.769455	-1.11008	-2.04767	0.045095	0.806249
ENSG00000159556	0.90605	-1.26103	2.04753	0.0451088	0.806249
ENSG00000248375	0.979343	-2.24309	2.05202	0.0451211	0.806249
ENSG00000164440	0.857782	-0.271862	2.04624	0.0452395	0.806249
ENSG00000204086	-0.640629	0.925339	-2.04553	0.0453125	0.806249
ENSG00000279718	-1.04896	-1.8007	-2.04538	0.0453295	0.806249
ENSG00000279460	1.16049	-3.13694	2.04529	0.0453361	0.806249
ENSG00000095713	-0.443723	3.45739	-2.04517	0.0453483	0.806249
ENSG00000180917	-0.178128	4.74079	-2.04456	0.0454107	0.806249
ENSG00000182557	-0.793971	0.208266	-2.0445	0.0454209	0.806249
ENSG00000268231	-0.772189	-0.813404	-2.0444	0.0454346	0.806249
ENSG00000117152	-0.941546	-0.125782	-2.04431	0.0454366	0.806249
ENSG00000277203	-0.868097	-0.152757	-2.044	0.0454683	0.806249
ENSG00000166140	-0.268188	5.00486	-2.0446	0.0455001	0.806249
ENSG00000169752	-0.953649	-1.45172	-2.04307	0.0455728	0.806249
ENSG00000265073	0.621745	0.0738318	2.04284	0.0455861	0.806249
ENSG00000239407	-0.267096	2.66185	-2.04232	0.0456394	0.806249
ENSG00000230305	-0.977322	-2.50396	-2.04218	0.0456777	0.806249
ENSG00000177685	0.941609	-1.42094	2.04139	0.0457348	0.806249
ENSG00000213654	-0.620006	1.64325	-2.04102	0.0457789	0.806249
ENSG00000177951	0.213066	4.65589	2.04076	0.0457993	0.806249
ENSG00000230894	1.1337	-3.28937	2.04068	0.0458075	0.806249
ENSG00000105976	0.723848	3.5095	2.03984	0.0458948	0.806249
ENSG00000124380	0.233334	5.33853	2.03934	0.0459458	0.806249
ENSG00000283031	-0.714094	-0.334133	-2.0391	0.0459773	0.806249
ENSG00000124233	1.1727	-3.37295	2.03898	0.0459832	0.806249
ENSG00000088827	-0.674209	1.3144	-2.03914	0.046016	0.806249
ENSG00000125409	0.511619	0.825841	2.03871	0.0460172	0.806249
ENSG00000176974	0.289254	4.97023	2.03842	0.0460404	0.806249
ENSG00000237268	0.7903	3.8837	2.03803	0.0460816	0.806249
ENSG00000213071	-0.446322	2.96089	-2.03783	0.0461013	0.806249
ENSG00000264720	0.495591	1.10446	2.03782	0.0461032	0.806249
ENSG00000160271	0.231641	6.88056	2.03766	0.0461191	0.806249
ENSG00000206588	-0.807799	2.8126	-2.0375	0.0461356	0.806249
ENSG00000259321	-0.648725	-0.382998	-2.03743	0.0461425	0.806249
ENSG00000136108	-0.410629	2.67588	-2.03736	0.0461822	0.806249
ENSG00000244053	-0.578697	1.22217	-2.03695	0.0461927	0.806249
ENSG00000164756	-1.04316	-2.55381	-2.037	0.0461933	0.806249
ENSG00000164588	-1.04899	-0.164808	-2.03647	0.0462417	0.806249
ENSG00000267858	0.353915	2.56437	2.03637	0.0462524	0.806249
ENSG00000118276	-0.592506	2.57045	-2.03614	0.0462765	0.806249
ENSG00000105392	1.70934	-1.2361	2.03609	0.0462854	0.806249
ENSG00000183304	1.76615	-0.478047	2.03918	0.0463004	0.806249
ENSG00000252481	-0.263684	8.01434	-2.03587	0.0463043	0.806249
ENSG00000136240	-0.214892	3.81861	-2.03547	0.0463462	0.806249
ENSG00000078725	-0.416532	3.28981	-2.03832	0.0463849	0.806249
ENSG00000227195	-0.93037	1.48616	-2.03496	0.0463982	0.806249
ENSG00000159131	-0.187878	5.00491	-2.03455	0.0464413	0.806249
ENSG00000230006	-0.765324	1.48745	-2.03536	0.0464561	0.806249
ENSG00000225091	-0.581354	3.18784	-2.03503	0.0464801	0.806249
ENSG00000273272	-0.978127	-2.9345	-2.03385	0.0465212	0.806249
ENSG00000249286	-0.599068	-0.540976	-2.03363	0.0465368	0.806249
ENSG00000136205	-0.366527	6.41217	-2.03345	0.0465572	0.806249
ENSG00000211578	-0.876938	-2.48729	-2.03473	0.0466054	0.806249
ENSG00000232846	0.521372	0.767959	2.03287	0.0466165	0.806249
ENSG00000010610	-0.578854	3.02097	-2.03435	0.0466167	0.806249
ENSG00000131435	0.9506	0.383395	2.03297	0.0466862	0.806249
ENSG00000176472	-0.381495	2.12753	-2.03292	0.0467048	0.806249
ENSG00000049192	-0.646122	2.47569	-2.03276	0.0467842	0.806249
ENSG00000255197	-0.803611	0.826209	-2.03136	0.0467859	0.806249
ENSG00000247157	-0.632699	2.31238	-2.03118	0.0467931	0.806249
ENSG00000114279	-0.513561	3.6822	-2.03257	0.0468071	0.806249
ENSG00000188610	-0.907935	-0.207235	-2.0307	0.046847	0.806249
ENSG00000104059	-0.598071	0.578946	-2.03038	0.0468768	0.806249
ENSG00000268659	-0.788941	0.189656	-2.03033	0.0468819	0.806249
ENSG00000213430	0.990527	-3.02809	2.03004	0.0469122	0.806249
ENSG00000147852	-0.260645	6.57378	-2.03231	0.0469191	0.806249
ENSG00000173264	-0.245665	3.73629	-2.02995	0.0469214	0.806249
ENSG00000272021	1.02156	-2.68694	2.02987	0.0469299	0.806249
ENSG00000231345	0.775893	-0.863092	2.02978	0.046939	0.806249
ENSG00000115255	0.687872	0.296659	2.02954	0.0469643	0.806249
ENSG00000197594	-0.519909	2.23488	-2.0287	0.0470544	0.806249
ENSG00000101544	0.175606	5.58425	2.03444	0.047066	0.806249
ENSG00000108349	0.235892	8.07817	2.02826	0.0470995	0.806249
ENSG00000259658	-0.580516	1.00401	-2.02825	0.0470998	0.806249
ENSG00000201331	-1.20228	0.986653	-2.02814	0.0471204	0.806249
ENSG00000268906	1.28733	-2.73786	2.03295	0.0471212	0.806249
ENSG00000227054	-0.957997	-2.91382	-2.02808	0.0471246	0.806249
ENSG00000214941	-0.205297	4.47801	-2.02801	0.0471256	0.806249
ENSG00000235169	0.746413	-0.182171	2.02791	0.0471421	0.806249
ENSG00000250506	-0.764681	-1.26599	-2.02778	0.0471495	0.806249
ENSG00000201451	0.783996	-2.4478	2.02771	0.047157	0.806249
ENSG00000143545	0.790911	0.892375	2.0275	0.0471945	0.806249
ENSG00000259845	-0.509031	1.90044	-2.02744	0.0471985	0.806249
ENSG00000261949	1.31513	-1.94914	2.02723	0.047208	0.806249
ENSG00000212664	1.18856	-2.33756	2.03391	0.0472859	0.806249
ENSG00000178764	0.202178	6.09559	2.0258	0.0473581	0.806249
ENSG00000270332	0.886355	-1.19084	2.02558	0.0473819	0.806249
ENSG00000198478	-0.219264	3.7232	-2.03139	0.0473911	0.806249
ENSG00000125740	-1.35977	-0.466754	-2.02476	0.047476	0.806249
ENSG00000159374	-0.970499	0.0369658	-2.0241	0.0475386	0.806249
ENSG00000151348	-0.168137	5.29074	-2.02814	0.0476007	0.806249
ENSG00000125734	0.205517	4.58474	2.02293	0.0476623	0.806249
ENSG00000185033	0.412255	5.36989	2.02288	0.0476678	0.806249
ENSG00000150593	-0.164997	6.08733	-2.02245	0.0477133	0.806249
ENSG00000214944	-0.30892	3.86274	-2.0222	0.0477398	0.806249
ENSG00000082684	-0.487307	3.40748	-2.02219	0.0477415	0.806249
ENSG00000239445	-0.509518	0.925857	-2.02196	0.0477662	0.806249
ENSG00000269353	1.23941	0.691874	2.02191	0.0477712	0.806249
ENSG00000148158	0.218244	7.37429	2.02171	0.047792	0.806249
ENSG00000078579	-1.11964	-1.13324	-2.02184	0.0477933	0.806249
ENSG00000234292	0.669407	-0.539095	2.0212	0.0478471	0.806249
ENSG00000087086	-0.398748	6.25561	-2.02122	0.0478574	0.806249
ENSG00000270528	1.10527	-3.06129	2.02092	0.0478785	0.806249
ENSG00000104267	-0.411066	5.84347	-2.02105	0.0478854	0.806249
ENSG00000231389	-0.717617	2.85933	-2.02156	0.0478907	0.806249
ENSG00000141002	0.184547	7.65164	2.02058	0.0479132	0.806249
ENSG00000249984	-0.791857	-1.91713	-2.02012	0.0479619	0.806249
ENSG00000275894	-1.01699	-0.843911	-2.01993	0.0479941	0.806249
ENSG00000226194	-0.967216	-1.02465	-2.01992	0.0480124	0.806249
ENSG00000252906	-0.545996	2.17212	-2.01961	0.0480165	0.806249
ENSG00000272970	-0.578536	-0.03336	-2.01965	0.0480185	0.806249
ENSG00000265982	-0.597798	0.352881	-2.02014	0.0480322	0.806249
ENSG00000261131	-0.843608	-2.05703	-2.01928	0.048052	0.806249
ENSG00000248559	0.858527	-1.13096	2.01918	0.0480623	0.806249
ENSG00000186458	1.10901	-3.684	2.02145	0.0480745	0.806249
ENSG00000176165	1.01361	-2.21897	2.01894	0.0480883	0.806249
ENSG00000206120	-0.57252	3.46403	-2.01929	0.04812	0.806249
ENSG00000236200	-0.983069	-1.8339	-2.01838	0.0481487	0.806249
ENSG00000128815	-0.608142	5.92571	-2.01824	0.0481637	0.806249
ENSG00000276693	0.9494	-3.18307	2.01807	0.0481816	0.806249
ENSG00000280000	-0.752355	0.863863	-2.01777	0.0482172	0.806249
ENSG00000215717	0.22358	3.05036	2.01768	0.0482231	0.806249
ENSG00000160131	0.300578	2.67169	2.0176	0.048232	0.806249
ENSG00000280560	-1.22079	-0.251005	-2.01758	0.0482343	0.806249
ENSG00000279110	0.805336	-0.127056	2.01703	0.0482934	0.806249
ENSG00000112511	-0.145958	5.58469	-2.01747	0.0483468	0.806249
ENSG00000201006	1.16401	-3.27565	2.01623	0.048393	0.806249
ENSG00000276707	1.1291	-3.35645	2.01603	0.0484008	0.806249
ENSG00000176903	-0.185593	4.6704	-2.01562	0.0484456	0.806249
ENSG00000090530	0.30528	3.33258	2.01548	0.0484606	0.806249
ENSG00000224292	0.91761	-2.61732	2.01522	0.048488	0.806249
ENSG00000188761	-0.460046	1.21984	-2.01501	0.0485109	0.806249
ENSG00000133519	0.665329	0.395243	2.01497	0.0485157	0.806249
ENSG00000127838	-0.237441	3.57332	-2.01483	0.0485305	0.806249
ENSG00000182389	-0.35988	5.1717	-2.0148	0.0485398	0.806249
ENSG00000088899	0.250749	5.96758	2.01472	0.0485427	0.806249
ENSG00000261485	0.362216	2.28246	2.01736	0.0485438	0.806249
ENSG00000174498	-0.334744	3.1874	-2.01459	0.0485558	0.806249
ENSG00000179855	0.831322	-0.280241	2.01532	0.0486177	0.806525
ENSG00000267014	-0.71233	-0.316445	-2.01386	0.0486518	0.806525
ENSG00000206605	-0.695804	-0.943204	-2.01381	0.0486899	0.806525
ENSG00000231274	1.23115	-2.7214	2.01336	0.0486983	0.806525
ENSG00000021645	-0.377628	7.78143	-2.01844	0.0487148	0.806525
ENSG00000112699	-0.257662	2.83117	-2.01238	0.0487952	0.807235
ENSG00000183722	-0.321283	4.30076	-2.0122	0.0488146	0.807235
ENSG00000198712	0.643046	7.69818	2.01177	0.0488615	0.807539
ENSG00000149016	0.289682	2.91387	2.01111	0.0489331	0.808242
ENSG00000168995	-0.825005	-0.640753	-2.01227	0.0489611	0.808242
ENSG00000200406	-0.868619	-2.07566	-2.01057	0.0489929	0.808298
ENSG00000234353	0.490808	0.329279	2.00994	0.0491084	0.809267
ENSG00000222365	-0.777837	2.69495	-2.0095	0.0491088	0.809267
ENSG00000251655	1.15352	-2.94054	2.00901	0.0491618	0.809671
ENSG00000181524	0.819637	-2.04359	2.00945	0.0492099	0.809991
ENSG00000261652	-0.84255	-2.0819	-2.00917	0.0492435	0.810022
ENSG00000232233	0.735635	-1.40073	2.0082	0.0492689	0.810022
ENSG00000282951	1.04025	-2.634	2.0071	0.0493713	0.810417
ENSG00000169989	-0.594807	1.12133	-2.00712	0.0493728	0.810417
ENSG00000115841	-0.410368	2.64427	-2.00842	0.049387	0.810417
ENSG00000255717	-0.709339	5.03314	-2.00615	0.0494752	0.810417
ENSG00000223960	-0.427591	1.63141	-2.00592	0.0495154	0.810417
ENSG00000248643	0.358153	1.4207	2.00679	0.0495203	0.810417
ENSG00000238105	0.37211	3.35029	2.00566	0.0495359	0.810417
ENSG00000228058	-0.973511	0.60219	-2.0058	0.0495479	0.810417
ENSG00000286262	0.840836	-1.84595	2.00843	0.0495502	0.810417
ENSG00000274012	0.57901	12.818	2.00477	0.049627	0.810449
ENSG00000275119	-0.825865	-1.22286	-2.00636	0.049633	0.810449
ENSG00000174442	-0.485697	1.20729	-2.00466	0.0496414	0.810449
ENSG00000274403	0.374272	1.11834	2.00497	0.049708	0.810449
ENSG00000239040	0.404794	2.54556	2.00375	0.0497392	0.810449
ENSG00000085999	-0.375328	3.36345	-2.00371	0.0497437	0.810449
ENSG00000226487	-1.19413	-1.60063	-2.00333	0.0497858	0.810449
ENSG00000080618	0.83696	-2.06606	2.00323	0.0497971	0.810449
ENSG00000183055	0.746525	0.0583167	2.00309	0.0498116	0.810449
ENSG00000255246	-1.03741	-1.69685	-2.00311	0.0498749	0.810449
ENSG00000177971	0.335007	1.71506	2.00227	0.0499022	0.810449
ENSG00000112972	-0.302407	5.02487	-2.00224	0.0499058	0.810449
ENSG00000099968	0.197023	5.8024	2.00102	0.0500413	0.810449
ENSG00000251544	1.28219	-2.43807	2.00499	0.0500606	0.810449
ENSG00000186635	-0.190657	8.13892	-2.00069	0.0500781	0.810449
ENSG00000196166	0.817499	-0.722092	1.99988	0.0501671	0.810449
ENSG00000150361	-0.631763	2.06327	-1.99955	0.0502042	0.810449
ENSG00000143622	-0.23117	4.08288	-1.99929	0.0502333	0.810449
ENSG00000159618	-0.890765	0.119989	-1.99921	0.0502416	0.810449
ENSG00000278590	0.50879	-0.19386	1.99912	0.0502522	0.810449
ENSG00000272851	0.757484	-0.846607	1.9987	0.0502983	0.810449
ENSG00000279384	-0.860219	-0.42104	-1.99868	0.0503135	0.810449
ENSG00000174851	-0.241691	2.9172	-1.99847	0.0503242	0.810449
ENSG00000106526	-0.429686	1.83093	-1.99846	0.0503258	0.810449
ENSG00000117010	-0.192267	3.72767	-1.99837	0.0503357	0.810449
ENSG00000179698	-0.270856	3.61184	-1.99828	0.0503456	0.810449
ENSG00000138382	0.205635	3.18964	1.99789	0.0503895	0.810449
ENSG00000234028	-0.450672	1.17513	-1.99777	0.050402	0.810449
ENSG00000011105	0.404171	1.68423	1.99732	0.0504524	0.810449
ENSG00000168158	-0.669704	-0.870947	-1.99728	0.0504568	0.810449
ENSG00000254239	1.02008	-2.47562	1.99667	0.0505249	0.810449
ENSG00000274008	-1.20506	-2.05613	-1.99714	0.0505302	0.810449
ENSG00000136404	-0.777087	2.47076	-1.99652	0.0505508	0.810449
ENSG00000279020	-0.45586	1.71777	-1.99666	0.0505513	0.810449
ENSG00000185442	-0.278863	3.22757	-1.99817	0.050553	0.810449
ENSG00000257083	-0.769724	-1.57063	-1.99559	0.0506544	0.810963
ENSG00000167208	-0.83606	0.111695	-1.99519	0.0506977	0.810963
ENSG00000115310	-0.229898	9.16613	-1.99426	0.0507951	0.810963
ENSG00000202048	-0.746414	-0.437485	-1.99404	0.0508714	0.810963
ENSG00000112394	-0.824828	0.859251	-1.9934	0.0508987	0.810963
ENSG00000278195	-0.889251	-2.1907	-1.99294	0.0509534	0.810963
ENSG00000176230	1.14666	-2.9727	1.99273	0.050967	0.810963
ENSG00000257818	-0.624236	-0.0139609	-1.9924	0.0510047	0.810963
ENSG00000101152	0.155069	5.70796	1.9924	0.0510049	0.810963
ENSG00000112139	-0.400501	4.25075	-1.99233	0.0510128	0.810963
ENSG00000265917	0.84312	-2.39371	1.99231	0.0510151	0.810963
ENSG00000222357	-1.03368	-2.20456	-1.99223	0.0510239	0.810963
ENSG00000201674	-0.924237	-2.46233	-1.9918	0.0510796	0.810963
ENSG00000266709	0.977594	-2.74648	1.99142	0.0511152	0.810963
ENSG00000105479	0.52716	1.33431	1.99096	0.0511666	0.810963
ENSG00000184640	0.25092	5.26945	1.99053	0.051216	0.810963
ENSG00000153157	0.352018	2.9786	1.99407	0.0512247	0.810963
ENSG00000231964	0.701101	-0.256869	1.98986	0.0512914	0.810963
ENSG00000162367	-0.66535	3.91936	-1.98912	0.0513754	0.810963
ENSG00000258947	-0.569551	0.427547	-1.98894	0.0513952	0.810963
ENSG00000254273	0.558199	-0.0591127	1.98881	0.0514108	0.810963
ENSG00000171161	0.191138	4.28595	1.9882	0.0514795	0.810963
ENSG00000182307	0.222027	3.4031	1.98823	0.0514909	0.810963
ENSG00000237899	0.788285	-1.59551	1.98799	0.0515064	0.810963
ENSG00000214514	1.14107	-3.48764	1.98799	0.0515417	0.810963
ENSG00000103005	0.208056	4.73972	1.98765	0.0515422	0.810963
ENSG00000136854	-0.181713	6.45788	-1.98697	0.0516199	0.810963
ENSG00000187098	-0.187012	5.2632	-1.98709	0.0516442	0.810963
ENSG00000272800	-0.583349	0.203214	-1.98687	0.0516486	0.810963
ENSG00000267788	0.791815	1.27871	1.98904	0.0516532	0.810963
ENSG00000227032	-0.936041	-0.0380585	-1.98642	0.051697	0.810963
ENSG00000130827	-0.228889	5.83539	-1.98625	0.0517014	0.810963
ENSG00000207445	-0.489786	8.06547	-1.98591	0.0517401	0.810963
ENSG00000196214	0.199266	4.14718	1.98578	0.0517553	0.810963
ENSG00000163126	0.295409	3.49248	1.98574	0.0517592	0.810963
ENSG00000282100	-0.258796	5.91644	-1.98585	0.0517751	0.810963
ENSG00000265474	0.664222	-1.79319	1.98559	0.0517772	0.810963
ENSG00000164535	-0.31253	4.99636	-1.98561	0.0517795	0.810963
ENSG00000145864	-0.8256	1.25418	-1.98555	0.0517811	0.810963
ENSG00000100314	0.573936	1.94218	1.98548	0.0517919	0.810963
ENSG00000169570	-0.286035	3.53493	-1.98531	0.0518084	0.810963
ENSG00000134207	-0.637985	3.16642	-1.98846	0.0518226	0.810963
ENSG00000166750	0.356268	4.83401	1.99224	0.0518227	0.810963
ENSG00000174600	-0.580057	3.30325	-1.985	0.051844	0.810963
ENSG00000068394	0.180312	5.21457	1.98428	0.0519259	0.811203
ENSG00000250067	0.422274	5.61893	1.98408	0.0519488	0.811203
ENSG00000174840	0.191161	4.33383	1.98407	0.0519506	0.811203
ENSG00000183087	0.289832	5.10901	1.98917	0.0519738	0.811203
ENSG00000184206	0.768578	0.587217	1.98346	0.0520207	0.811401
ENSG00000105887	-0.239506	3.31154	-1.98317	0.0520541	0.811401
ENSG00000164934	-0.264958	3.82405	-1.98274	0.0521032	0.811401
ENSG00000149089	-0.452999	4.23793	-1.98263	0.0521151	0.811401
ENSG00000265241	-0.188613	5.17469	-1.98251	0.0521296	0.811401
ENSG00000101019	0.118478	5.74224	1.9813	0.0522681	0.812762
ENSG00000250007	-0.953223	-2.22265	-1.981	0.0523027	0.812762
ENSG00000171631	-0.90501	0.271812	-1.9813	0.0523414	0.812762
ENSG00000187908	-0.535172	3.30092	-1.97999	0.0524188	0.812762
ENSG00000153487	0.273334	3.29765	1.97987	0.0524337	0.812762
ENSG00000239043	-0.773022	2.65301	-1.97956	0.0524685	0.812762
ENSG00000284640	0.882506	-2.1739	1.97953	0.0524721	0.812762
ENSG00000272498	0.71693	-0.554133	1.97931	0.0524975	0.812762
ENSG00000151748	0.190546	4.37967	1.97926	0.0525041	0.812762
ENSG00000240922	-0.779364	-2.77078	-1.97912	0.05252	0.812762
ENSG00000174977	0.821127	-2.51383	1.98011	0.0525325	0.812762
ENSG00000173157	-1.00987	-0.161936	-1.97784	0.0526677	0.814392
ENSG00000251898	-0.652728	1.31226	-1.9776	0.0526953	0.814392
ENSG00000255980	-0.977028	0.836897	-1.97731	0.0527293	0.814474
ENSG00000042980	-0.831287	5.5611	-1.97654	0.0528218	0.815458
ENSG00000077264	-0.460463	3.65289	-1.97586	0.0529519	0.817021
ENSG00000223836	1.20979	-2.97685	1.97395	0.0531203	0.818985
ENSG00000264985	1.16425	-3.2508	1.97381	0.0531369	0.818985
ENSG00000254139	0.93195	-2.94701	1.97957	0.0531781	0.819174
ENSG00000251348	0.394369	2.7109	1.97288	0.0532455	0.819215
ENSG00000259438	0.905112	-2.09201	1.97255	0.0532834	0.819215
ENSG00000249237	-0.484387	0.349944	-1.972	0.053348	0.819215
ENSG00000169413	-0.841401	0.108128	-1.97208	0.0533576	0.819215
ENSG00000205364	-0.945553	-0.418506	-1.97202	0.0533591	0.819215
ENSG00000129993	-0.677272	0.961093	-1.97193	0.0533738	0.819215
ENSG00000105711	-0.222212	5.02864	-1.9716	0.0533953	0.819215
ENSG00000152518	-0.369407	5.38872	-1.97103	0.0534618	0.819215
ENSG00000244427	0.86555	-2.13089	1.97499	0.053464	0.819215
ENSG00000166068	-0.165814	6.35365	-1.97087	0.0534807	0.819215
ENSG00000118971	-0.392957	3.78855	-1.97072	0.0534987	0.819215
ENSG00000178809	0.624586	-0.0317878	1.97039	0.0535472	0.819516
ENSG00000204860	0.428983	2.6663	1.96964	0.0536249	0.820068
ENSG00000188215	0.229911	4.207	1.96934	0.0536597	0.820068
ENSG00000061273	-0.189037	5.64304	-1.96995	0.0536702	0.820068
ENSG00000153933	0.268649	4.27812	1.97063	0.0538465	0.82158
ENSG00000261757	-0.931335	-2.87733	-1.96791	0.0538492	0.82158
ENSG00000131100	-0.259491	4.452	-1.96786	0.0538601	0.82158
ENSG00000197180	-0.615277	0.425841	-1.96743	0.0538851	0.82158
ENSG00000269486	-0.903271	-1.23401	-1.96693	0.0539466	0.821831
ENSG00000253869	0.718157	-1.2621	1.96646	0.0540002	0.821831
ENSG00000267475	-0.807274	-1.15353	-1.96616	0.0540353	0.821831
ENSG00000173436	0.263296	2.50723	1.96616	0.0540361	0.821831
ENSG00000100299	-0.175035	5.06358	-1.96597	0.0540585	0.821831
ENSG00000249846	0.539188	1.84948	1.96582	0.0540754	0.821831
ENSG00000174306	0.143553	7.5206	1.96558	0.0541045	0.821831
ENSG00000279633	-0.883832	-0.62903	-1.96546	0.0541396	0.821925
ENSG00000257261	-0.449473	0.873582	-1.96444	0.0542393	0.822611
ENSG00000236581	0.818818	-1.65016	1.96419	0.0542698	0.822611
ENSG00000173320	0.226962	6.9515	1.96353	0.0543479	0.822611
ENSG00000132205	-0.381965	5.22884	-1.9626	0.054458	0.822611
ENSG00000260630	-0.294168	2.8095	-1.96241	0.0545056	0.822611
ENSG00000275963	-0.900883	-2.05886	-1.96345	0.0545215	0.822611
ENSG00000236047	-0.327867	1.95046	-1.96155	0.0546089	0.822611
ENSG00000188549	0.237911	6.02289	1.96131	0.054613	0.822611
ENSG00000265798	-0.801882	1.09162	-1.96117	0.0546289	0.822611
ENSG00000141867	0.157895	7.25306	1.96082	0.0546706	0.822611
ENSG00000104147	0.861307	-2.43478	1.96074	0.0546801	0.822611
ENSG00000240654	0.756116	-0.482556	1.96067	0.054689	0.822611
ENSG00000184307	-0.562919	2.24649	-1.96065	0.0546916	0.822611
ENSG00000229044	-0.86639	-2.13773	-1.96041	0.0547205	0.822611
ENSG00000172375	-0.164893	5.03416	-1.96023	0.0547413	0.822611
ENSG00000145391	0.262127	6.11847	1.95952	0.0548276	0.822611
ENSG00000228793	-0.720509	3.83435	-1.95923	0.0548618	0.822611
ENSG00000175697	0.431143	0.733153	1.95909	0.0548784	0.822611
ENSG00000277977	-0.521624	0.0168049	-1.95897	0.0548929	0.822611
ENSG00000258761	1.03522	-3.4074	1.95891	0.0549029	0.822611
ENSG00000223930	-0.881329	-2.26948	-1.95884	0.0549087	0.822611
ENSG00000265337	-0.392126	1.87003	-1.95865	0.0549314	0.822611
ENSG00000143353	-0.234844	4.07011	-1.95828	0.0549751	0.822611
ENSG00000181908	-1.10594	-0.245952	-1.95808	0.0549993	0.822611
ENSG00000129991	1.0617	-3.51651	1.95851	0.0550174	0.822611
ENSG00000212588	-0.648853	3.17942	-1.95786	0.0550264	0.822611
ENSG00000134917	-0.442855	3.27506	-1.95777	0.0550364	0.822611
ENSG00000270141	0.877841	-2.64455	1.95775	0.0550396	0.822611
ENSG00000240563	1.08447	-1.54312	1.95763	0.055053	0.822611
ENSG00000128656	-0.178358	3.93844	-1.95732	0.0550912	0.822611
ENSG00000174938	-0.287617	4.1419	-1.95723	0.0551016	0.822611
ENSG00000072274	-0.284183	4.81442	-1.95713	0.0551135	0.822611
ENSG00000284343	-0.91245	-2.35664	-1.95672	0.0551634	0.822922
ENSG00000271009	-0.70595	1.36599	-1.95551	0.0553093	0.824234
ENSG00000176381	0.386006	5.62173	1.95551	0.0553095	0.824234
ENSG00000086544	0.285203	3.98825	1.95488	0.055385	0.824926
ENSG00000278811	0.926878	-2.75858	1.95362	0.0555407	0.826072
ENSG00000173068	-0.463425	3.38703	-1.95341	0.0555642	0.826072
ENSG00000252023	-0.906421	-2.03111	-1.95285	0.055644	0.826072
ENSG00000263400	-0.631028	-0.0575434	-1.95271	0.0556482	0.826072
ENSG00000207468	-0.809297	3.01309	-1.95192	0.0557445	0.826072
ENSG00000005889	-0.133935	5.75996	-1.95225	0.0557832	0.826072
ENSG00000167447	0.283264	2.75488	1.95145	0.0558012	0.826072
ENSG00000272904	0.859792	0.894926	1.95105	0.0558505	0.826072
ENSG00000184005	-0.208804	5.49874	-1.95094	0.0558635	0.826072
ENSG00000166557	-0.218553	4.3893	-1.95059	0.0559056	0.826072
ENSG00000272076	0.641511	-0.961964	1.95019	0.0559554	0.826072
ENSG00000205746	-0.373401	2.60485	-1.9501	0.0559661	0.826072
ENSG00000219507	-0.845079	-1.78334	-1.95139	0.0559761	0.826072
ENSG00000143333	-0.718252	2.90875	-1.94986	0.0559952	0.826072
ENSG00000275450	-0.910119	-1.58608	-1.94965	0.0560205	0.826072
ENSG00000116981	-0.557927	0.712578	-1.94933	0.0560754	0.826072
ENSG00000112159	0.173177	10.2451	1.94873	0.0561338	0.826072
ENSG00000251868	-0.830348	-3.10394	-1.94864	0.0561445	0.826072
ENSG00000173894	0.585171	0.166612	1.94836	0.0561778	0.826072
ENSG00000236204	-0.298912	1.61396	-1.94963	0.0561796	0.826072
ENSG00000130303	-0.555376	1.93683	-1.94823	0.0561954	0.826072
ENSG00000274225	1.02485	-2.04398	1.9497	0.0562271	0.826072
ENSG00000254088	0.720619	-1.08932	1.94784	0.0562426	0.826072
ENSG00000146938	-0.359829	4.49591	-1.94794	0.0562628	0.826072
ENSG00000169814	-0.233294	4.3296	-1.9492	0.05627	0.826072
ENSG00000132670	-0.145615	6.47504	-1.94758	0.0562739	0.826072
ENSG00000070759	-0.233396	5.57078	-1.94723	0.0563174	0.826072
ENSG00000137142	-0.744068	-0.523685	-1.94713	0.0563297	0.826072
ENSG00000198727	0.636105	7.06075	1.94688	0.0563594	0.826072
ENSG00000176912	-0.427512	2.3758	-1.94684	0.0563648	0.826072
ENSG00000270178	0.881533	-3.4778	1.94792	0.0563655	0.826072
ENSG00000229196	1.00392	-2.75838	1.94577	0.0564963	0.827562
ENSG00000261556	-0.265812	4.85203	-1.94486	0.0566078	0.828391
ENSG00000178795	-1.08738	-3.08663	-1.94483	0.0566114	0.828391
ENSG00000269053	0.858759	-2.14872	1.94384	0.0567339	0.829755
ENSG00000169021	-0.35924	2.53538	-1.94311	0.0568241	0.830559
ENSG00000222578	-0.563531	-0.303469	-1.9431	0.0568475	0.830559
ENSG00000255823	0.767486	1.04301	1.94249	0.0569012	0.830608
ENSG00000242324	0.88648	-3.00345	1.94445	0.0569094	0.830608
ENSG00000161547	-0.199944	5.94215	-1.94129	0.0570492	0.83222
ENSG00000251869	-0.645305	0.746959	-1.94098	0.0570875	0.83235
ENSG00000229743	-0.469607	1.41656	-1.9405	0.0571473	0.832532
ENSG00000110046	0.155403	5.62741	1.94041	0.0571587	0.832532
ENSG00000226808	1.18311	-2.32693	1.94047	0.0572112	0.832869
ENSG00000105675	1.22962	-2.14557	1.93939	0.0572907	0.833531
ENSG00000225937	0.438806	1.96105	1.93863	0.057416	0.833531
ENSG00000148300	0.175696	5.33903	1.93794	0.0574662	0.833531
ENSG00000139725	0.248078	2.93767	1.93789	0.0574724	0.833531
ENSG00000108439	0.228399	3.03922	1.93786	0.0574765	0.833531
ENSG00000257335	0.620534	0.961487	1.94066	0.057483	0.833531
ENSG00000120708	-0.746767	1.26528	-1.93781	0.0574831	0.833531
ENSG00000261737	0.577261	-0.0278711	1.93773	0.057492	0.833531
ENSG00000221540	-0.839286	-2.05321	-1.93701	0.0575829	0.83424
ENSG00000132170	-0.648835	0.766651	-1.93663	0.0576304	0.83424
ENSG00000241336	1.24941	-2.35455	1.94211	0.0576467	0.83424
ENSG00000162630	-0.375657	3.28116	-1.9372	0.0576586	0.83424
ENSG00000173114	-0.59183	1.28303	-1.93558	0.0577621	0.835287
ENSG00000183486	-0.639873	2.84816	-1.93722	0.0577899	0.835287
ENSG00000181350	-0.542201	1.40162	-1.93485	0.0578525	0.835765
ENSG00000188163	-0.79888	-2.25692	-1.93455	0.0579221	0.836045
ENSG00000166562	-0.189591	5.06617	-1.93589	0.0579309	0.836045
ENSG00000285966	0.886162	-2.89133	1.93351	0.058021	0.836112
ENSG00000239494	-0.718009	-0.265928	-1.93356	0.0580313	0.836112
ENSG00000224985	-0.864471	-1.77719	-1.9332	0.0580609	0.836112
ENSG00000163743	-0.19059	3.94389	-1.93319	0.0580612	0.836112
ENSG00000165675	0.287909	4.19672	1.93281	0.0581089	0.836112
ENSG00000162511	-0.539794	3.71281	-1.93279	0.0581125	0.836112
ENSG00000174482	-1.39077	-1.42315	-1.93246	0.0581537	0.83628
ENSG00000258749	-0.785881	-1.15677	-1.93188	0.0582331	0.836778
ENSG00000175931	0.168472	6.38924	1.93172	0.0582474	0.836778
ENSG00000102302	-0.340243	2.41257	-1.93125	0.0583065	0.836824
ENSG00000230373	0.543323	3.64426	1.93105	0.0583312	0.836824
ENSG00000185942	-0.57614	1.04056	-1.93092	0.0583475	0.836824
ENSG00000280160	0.785386	-2.4492	1.93051	0.0584004	0.836824
ENSG00000252577	-0.504024	2.82832	-1.9305	0.0584007	0.836824
ENSG00000066813	1.80039	0.397422	1.9303	0.0584277	0.836824
ENSG00000170144	-0.198848	7.58351	-1.92985	0.0584833	0.83689
ENSG00000253187	1.21595	-2.92009	1.92974	0.0585013	0.83689
ENSG00000141668	-0.967754	-0.298112	-1.92962	0.0585209	0.83689
ENSG00000175820	0.548287	1.78477	1.92901	0.0585899	0.837455
ENSG00000268401	-0.70995	-0.159195	-1.92868	0.0586449	0.837698
ENSG00000257122	-0.223133	3.26634	-1.92841	0.058666	0.837698
ENSG00000263069	-0.270763	1.9006	-1.92725	0.0588139	0.83894
ENSG00000123104	-0.439639	8.05695	-1.92746	0.0588412	0.83894
ENSG00000134516	-0.577022	6.25579	-1.93067	0.0588418	0.83894
ENSG00000272512	-1.00315	-1.96428	-1.92639	0.0589234	0.839681
ENSG00000240692	-0.762222	-1.27706	-1.92542	0.0590462	0.840537
ENSG00000240869	0.859493	-0.33317	1.92525	0.0590837	0.840537
ENSG00000274883	-0.38176	1.39109	-1.92514	0.0590842	0.840537
ENSG00000146242	-0.62475	1.23385	-1.92476	0.0591329	0.840537
ENSG00000107099	-0.649735	6.41124	-1.9263	0.0591803	0.840537
ENSG00000118557	0.342005	4.00659	1.92435	0.059183	0.840537
ENSG00000140945	-0.420254	3.77276	-1.92418	0.0592057	0.840537
ENSG00000100030	0.143546	6.20729	1.92406	0.0592208	0.840537
ENSG00000278344	0.780291	-2.07582	1.92354	0.059287	0.841057
[truncated: 26,346 more rows]

## Sheet: D
Non-Neuron BP control
	logFC	AveExpr	t	P.Value	adj.P.Val
ENSG00000251372	2.90428	-1.1586	5.2072	2.59931e-06	0.0473398
ENSG00000229212	2.83496	-1.86449	5.13884	3.34037e-06	0.0473398
ENSG00000160818	-1.00083	5.06492	-4.94477	6.97295e-06	0.0658804
ENSG00000199883	2.57564	-1.24249	4.33372	5.85064e-05	0.414576
ENSG00000072501	-0.57847	8.35426	-4.21867	8.8274e-05	0.458813
ENSG00000252496	1.10691	-0.490986	4.1711	0.000101813	0.458813
ENSG00000254440	-2.44455	-2.09824	-4.14445	0.000113311	0.458813
ENSG00000124228	-0.563324	7.20061	-3.97375	0.000196838	0.653911
ENSG00000282142	1.91732	-1.43737	3.88734	0.000265038	0.653911
ENSG00000253444	2.05949	-2.81122	3.84339	0.00030585	0.653911
ENSG00000283385	2.07291	-2.11239	3.808	0.000338374	0.653911
ENSG00000226763	-0.936348	3.37251	-3.80373	0.000347531	0.653911
ENSG00000125351	-0.815976	6.90202	-3.78213	0.00036786	0.653911
ENSG00000199150	-2.2258	-1.91151	-3.7808	0.000369441	0.653911
ENSG00000280069	0.572111	3.23389	3.76189	0.000392618	0.653911
ENSG00000235629	1.57848	-1.69751	3.73853	0.000423195	0.653911
ENSG00000100362	2.02157	-2.5532	3.73323	0.000430435	0.653911
ENSG00000233593	0.726033	3.30869	3.73293	0.000430852	0.653911
ENSG00000239513	2.74252	-2.31046	3.70838	0.000466022	0.653911
ENSG00000235613	-1.01349	5.90307	-3.70331	0.000473615	0.653911
ENSG00000228044	-2.43204	-1.80714	-3.69382	0.000488167	0.653911
ENSG00000183054	1.76341	-2.03434	3.67449	0.000525275	0.653911
ENSG00000250878	1.25954	0.167593	3.64966	0.000567819	0.653911
ENSG00000212163	1.62509	-1.13216	3.63983	0.000579369	0.653911
ENSG00000204120	-0.451015	8.6949	-3.63948	0.000586711	0.653911
ENSG00000140259	-0.63703	5.92477	-3.55722	0.000751085	0.653911
ENSG00000231817	-2.49185	-1.69014	-3.53223	0.000811933	0.653911
ENSG00000162994	0.551308	4.51729	3.52145	0.000839602	0.653911
ENSG00000286100	2.43301	-0.658966	3.52023	0.000842788	0.653911
ENSG00000158417	-0.678724	7.0885	-3.5148	0.000857114	0.653911
ENSG00000122786	-0.887381	8.90939	-3.50952	0.000880185	0.653911
ENSG00000138231	0.464213	3.64219	3.47679	0.00096406	0.653911
ENSG00000200818	1.77029	-2.57217	3.46588	0.000997037	0.653911
ENSG00000248795	2.05069	-1.3876	3.46328	0.00100507	0.653911
ENSG00000166326	-0.562919	8.57794	-3.45512	0.00103062	0.653911
ENSG00000122756	0.995399	3.51409	3.45763	0.00103265	0.653911
ENSG00000200372	1.45194	-2.34645	3.45489	0.00104115	0.653911
ENSG00000225675	1.84724	-2.63926	3.45446	0.00104273	0.653911
ENSG00000117016	1.12514	2.16778	3.45011	0.00105672	0.653911
ENSG00000239272	0.893241	0.597328	3.44006	0.00107938	0.653911
ENSG00000263790	1.53941	-1.85167	3.43527	0.00109537	0.653911
ENSG00000249605	1.35359	-1.36514	3.42968	0.00111429	0.653911
ENSG00000165632	-0.520259	5.19636	-3.42441	0.00114305	0.653911
ENSG00000250331	1.54322	-3.03641	3.41941	0.00114987	0.653911
ENSG00000214456	1.12219	2.64375	3.42171	0.00115257	0.653911
ENSG00000136938	-0.652307	5.99751	-3.41181	0.00117686	0.653911
ENSG00000115053	-0.616192	8.39727	-3.40908	0.00118673	0.653911
ENSG00000259485	2.07409	-3.60636	3.40414	0.00120473	0.653911
ENSG00000203756	1.57968	-1.49206	3.40226	0.00121167	0.653911
ENSG00000133142	-0.768675	6.66609	-3.39852	0.00123681	0.653911
ENSG00000254452	-1.93357	-2.0408	-3.39206	0.00126112	0.653911
ENSG00000285218	0.956345	0.578141	3.39137	0.00126261	0.653911
ENSG00000236544	-2.09318	-1.24728	-3.38494	0.0012881	0.653911
ENSG00000267361	1.48085	1.48411	3.38058	0.00129433	0.653911
ENSG00000233056	-2.13487	-1.88328	-3.36597	0.00135302	0.653911
ENSG00000277579	1.32736	-1.18563	3.35544	0.00139686	0.653911
ENSG00000277715	0.830907	0.504064	3.358	0.00139831	0.653911
ENSG00000234884	1.74408	-2.39399	3.35261	0.0014212	0.653911
ENSG00000244491	-1.83094	-0.706431	-3.3454	0.00143992	0.653911
ENSG00000133519	1.29086	0.395243	3.34305	0.00145014	0.653911
ENSG00000240922	-1.91961	-2.77078	-3.33943	0.00146608	0.653911
ENSG00000114867	-0.315282	7.44755	-3.33229	0.00149801	0.653911
ENSG00000201348	1.68544	-1.90976	3.3336	0.00150486	0.653911
ENSG00000185186	-2.04654	-2.80023	-3.33026	0.00151977	0.653911
ENSG00000187536	-0.595342	4.7357	-3.31638	0.0015715	0.653911
ENSG00000277053	0.776184	3.45031	3.31633	0.00157174	0.653911
ENSG00000135314	0.729616	1.59248	3.31157	0.00159438	0.653911
ENSG00000284292	1.12546	-0.380817	3.3091	0.00160625	0.653911
ENSG00000198830	0.367149	4.99464	3.30783	0.00162596	0.653911
ENSG00000117174	-0.546781	6.20913	-3.29807	0.0016741	0.653911
ENSG00000265539	2.01063	-2.20954	3.29649	0.00168204	0.653911
ENSG00000156411	0.43389	3.40205	3.29345	0.00169739	0.653911
ENSG00000207352	1.33517	-2.0761	3.27704	0.00178222	0.653911
ENSG00000175449	0.755387	0.819718	3.27132	0.00179853	0.653911
ENSG00000200593	1.71661	0.340012	3.27002	0.00182008	0.653911
ENSG00000171819	-2.00334	-1.98148	-3.26939	0.00182299	0.653911
ENSG00000273372	1.78067	-1.8696	3.26908	0.00182527	0.653911
ENSG00000223727	1.37259	-0.838661	3.26467	0.00184895	0.653911
ENSG00000283281	1.34144	-1.74324	3.2628	0.00185896	0.653911
ENSG00000065000	-0.395223	8.05719	-3.25556	0.00188504	0.653911
ENSG00000152977	0.769211	3.09071	3.25355	0.00189631	0.653911
ENSG00000059915	0.65612	2.54178	3.25163	0.0019072	0.653911
ENSG00000166963	-0.535904	9.01976	-3.24831	0.00194138	0.653911
ENSG00000279660	-2.14928	-1.50451	-3.24752	0.00194555	0.653911
ENSG00000244879	0.546287	8.02546	3.24226	0.001961	0.653911
ENSG00000269495	-1.9365	-1.17195	-3.22183	0.00208341	0.672813
ENSG00000065621	0.61205	4.11132	3.22111	0.00208785	0.672813
ENSG00000264672	-1.15601	4.60282	-3.21994	0.00211085	0.672813
ENSG00000198399	-0.456703	8.05259	-3.2139	0.00213284	0.672813
ENSG00000100813	-0.469311	9.43329	-3.21334	0.00213637	0.672813
ENSG00000271607	1.65613	-2.48744	3.19814	0.00223429	0.690881
ENSG00000200350	1.64468	-2.59093	3.19425	0.00226008	0.690881
ENSG00000040633	-0.370655	4.26711	-3.19573	0.00226686	0.690881
ENSG00000123200	-0.640551	9.32349	-3.17859	0.00238402	0.711037
ENSG00000172171	0.45055	3.73428	3.17107	0.00241928	0.711037
ENSG00000255219	1.39032	-2.07184	3.17343	0.00242003	0.711037
ENSG00000269984	0.987083	-0.63107	3.16867	0.00243637	0.711037
ENSG00000269815	1.55002	-1.94794	3.1656	0.00245842	0.711037
ENSG00000207042	1.54156	-2.80646	3.16282	0.00249642	0.713317
ENSG00000116754	-0.574371	9.49601	-3.15934	0.00252203	0.713317
ENSG00000149136	-0.352906	5.94179	-3.14378	0.00262029	0.713317
ENSG00000201801	1.78901	-3.05788	3.14247	0.00263033	0.713317
ENSG00000087269	-0.392168	6.73959	-3.142	0.00263392	0.713317
ENSG00000252438	1.6021	-2.46729	3.14079	0.00266196	0.713317
ENSG00000104951	-1.76259	-0.184024	-3.13829	0.00268109	0.713317
ENSG00000109063	-0.705409	6.50922	-3.12884	0.00273687	0.713317
ENSG00000268575	0.712769	2.69177	3.12444	0.00277208	0.713317
ENSG00000049656	-0.375349	5.16622	-3.12649	0.00277487	0.713317
ENSG00000108848	-0.703822	10.9203	-3.1217	0.00279429	0.713317
ENSG00000230267	1.39879	1.15711	3.12071	0.00282171	0.713317
ENSG00000111011	-0.447059	8.26826	-3.11716	0.00283138	0.713317
ENSG00000090861	-0.348266	7.27899	-3.11828	0.00284172	0.713317
ENSG00000130816	-0.332508	7.66568	-3.11551	0.00284494	0.713317
ENSG00000248698	0.955074	0.604491	3.10837	0.00290447	0.713317
ENSG00000187037	1.095	0.702163	3.10579	0.00292628	0.713317
ENSG00000141469	1.62781	4.3518	3.10711	0.002935	0.713317
ENSG00000145817	0.492304	2.58236	3.10291	0.00295073	0.713317
ENSG00000054179	1.1466	1.22629	3.09999	0.00299608	0.713317
ENSG00000167770	-0.342658	4.72624	-3.09714	0.00300046	0.713317
ENSG00000258978	1.13155	-0.755787	3.09677	0.00302395	0.713317
ENSG00000235852	-1.14186	1.22938	-3.09435	0.00304514	0.713317
ENSG00000160111	1.29411	3.81127	3.09099	0.00307482	0.714366
ENSG00000082805	-0.524309	8.11598	-3.08423	0.00311444	0.717446
ENSG00000079819	-0.48372	9.22636	-3.07915	0.00316037	0.717446
ENSG00000176927	-0.778707	2.83127	-3.07537	0.003195	0.717446
ENSG00000233492	1.17511	-0.857406	3.07473	0.00320096	0.717446
ENSG00000254972	1.46339	-1.30512	3.07553	0.00321463	0.717446
ENSG00000280278	-2.11424	-2.33725	-3.06573	0.00328486	0.727391
ENSG00000096070	-0.357834	6.12195	-3.06363	0.00332638	0.730875
ENSG00000224227	1.23116	0.337292	3.05637	0.00339467	0.740142
ENSG00000249381	1.92079	-3.22265	3.05273	0.00343179	0.742524
ENSG00000245556	0.475761	2.41344	3.04731	0.0034632	0.743644
ENSG00000257809	0.819325	0.489656	3.04139	0.00354388	0.755247
ENSG00000266709	1.81853	-2.74648	3.02773	0.00366273	0.77125
ENSG00000230269	1.30084	-0.577744	3.02462	0.00369531	0.77125
ENSG00000202261	1.79358	-1.98011	3.0202	0.00374218	0.77125
ENSG00000280332	0.431239	3.52361	3.01953	0.00374938	0.77125
ENSG00000200949	1.46589	0.283387	3.01532	0.0038179	0.77125
ENSG00000135506	-0.343625	7.0904	-3.01112	0.00384025	0.77125
ENSG00000167460	-0.530186	7.9717	-3.01155	0.00385925	0.77125
ENSG00000242551	0.990593	1.08611	3.00631	0.00389308	0.77125
ENSG00000083099	0.412418	4.67712	3.00183	0.0039671	0.77125
ENSG00000285644	2.02504	0.167933	2.99677	0.00400002	0.77125
ENSG00000262454	0.699336	2.11147	2.99223	0.00407643	0.77125
ENSG00000256029	0.592834	2.64058	2.99007	0.00407672	0.77125
ENSG00000267213	1.03913	0.607269	2.98978	0.00408014	0.77125
ENSG00000153896	0.478999	2.64518	2.98841	0.00409604	0.77125
ENSG00000141744	1.57214	0.36088	2.99001	0.00410189	0.77125
ENSG00000198618	1.76744	-1.21099	2.98633	0.0041449	0.77125
ENSG00000178233	0.828564	1.34469	2.98558	0.00415382	0.77125
ENSG00000231967	1.37196	-1.88037	2.98281	0.00416146	0.77125
ENSG00000162191	-0.523221	6.16616	-2.9746	0.00425911	0.77125
ENSG00000204574	-0.421691	6.68467	-2.97341	0.00427349	0.77125
ENSG00000185070	0.809402	4.28365	2.97199	0.00429071	0.77125
ENSG00000104714	-0.521113	7.0529	-2.96952	0.00432075	0.77125
ENSG00000016864	0.402959	3.91222	2.97097	0.00432835	0.77125
ENSG00000203286	0.896257	-0.0385226	2.96618	0.00436162	0.77125
ENSG00000251988	1.12302	-0.771659	2.95977	0.00444108	0.77125
ENSG00000183604	0.866977	4.40241	2.96029	0.00446047	0.77125
ENSG00000163631	1.36746	0.0616122	2.95771	0.004467	0.77125
ENSG00000214093	-0.995133	0.271337	-2.95733	0.0044718	0.77125
ENSG00000255642	0.965605	0.276238	2.95599	0.00448868	0.77125
ENSG00000063046	-0.311128	6.60346	-2.95505	0.00450057	0.77125
ENSG00000206195	1.09543	0.579816	2.95472	0.00450477	0.77125
ENSG00000185414	0.420519	3.0857	2.95542	0.00452198	0.77125
ENSG00000104907	-0.391802	5.25383	-2.94821	0.00458789	0.77125
ENSG00000258733	0.748184	1.20551	2.9439	0.00464386	0.77125
ENSG00000134186	-0.594155	8.32815	-2.94099	0.00468192	0.77125
ENSG00000099331	-0.48838	10.1355	-2.93759	0.00472679	0.77125
ENSG00000126653	-0.521723	7.33484	-2.93479	0.00476404	0.77125
ENSG00000115461	0.925219	3.84442	2.93675	0.00476486	0.77125
ENSG00000274460	0.565789	2.25654	2.93328	0.0048113	0.77125
ENSG00000135372	-0.301742	6.71175	-2.9279	0.00485685	0.77125
ENSG00000270804	0.412211	2.85728	2.92718	0.00486666	0.77125
ENSG00000187607	0.475492	2.72982	2.92191	0.00493895	0.77125
ENSG00000141456	-0.475899	6.72093	-2.92116	0.00494922	0.77125
ENSG00000284731	-1.74487	-0.488678	-2.92071	0.00498297	0.77125
ENSG00000127989	0.325964	4.9438	2.91848	0.00498646	0.77125
ENSG00000167522	-0.373651	8.72676	-2.91686	0.00500904	0.77125
ENSG00000204209	-0.437011	4.45404	-2.91646	0.00501475	0.77125
ENSG00000119707	-0.594059	10.1072	-2.91799	0.0050212	0.77125
ENSG00000199804	1.23764	-0.730853	2.91595	0.00502188	0.77125
ENSG00000169062	-0.483434	8.52582	-2.91783	0.00502338	0.77125
ENSG00000200488	1.27316	3.50726	2.91539	0.00502973	0.77125
ENSG00000275345	1.26804	-1.44137	2.91509	0.00503392	0.77125
ENSG00000175287	1.15769	3.08185	2.91318	0.00508891	0.774768
ENSG00000270562	0.7779	1.16005	2.91054	0.00512415	0.774768
ENSG00000163166	-0.464484	8.82908	-2.90584	0.00516552	0.774768
ENSG00000230863	1.20187	-1.33751	2.90492	0.0051787	0.774768
ENSG00000112159	-0.356289	10.2451	-2.8993	0.00526043	0.774768
ENSG00000111229	0.493713	4.14518	2.90125	0.00526056	0.774768
ENSG00000156486	1.79472	-2.76456	2.89807	0.00527837	0.774768
ENSG00000237911	-1.71209	-2.28564	-2.89367	0.0053434	0.774768
ENSG00000268750	-1.90033	-2.22573	-2.88937	0.00543605	0.774768
ENSG00000274340	1.48061	-1.73124	2.88717	0.00544076	0.774768
ENSG00000167670	-0.545582	4.48682	-2.88711	0.00544173	0.774768
ENSG00000131771	1.02429	2.99932	2.88781	0.00546039	0.774768
ENSG00000235319	1.53085	-2.49721	2.88066	0.00553986	0.774768
ENSG00000170469	0.462	1.946	2.8758	0.00561491	0.774768
ENSG00000267122	-1.40964	0.68728	-2.8727	0.00566343	0.774768
ENSG00000102241	-0.466455	5.72813	-2.87243	0.00569745	0.774768
ENSG00000277559	1.48335	-2.03024	2.86971	0.00571038	0.774768
ENSG00000153774	-0.433914	5.7058	-2.86912	0.00574979	0.774768
ENSG00000141642	0.550721	2.42984	2.8668	0.00575649	0.774768
ENSG00000285756	1.00278	0.892912	2.86539	0.00580935	0.774768
ENSG00000083896	-0.4493	8.80654	-2.8647	0.00582045	0.774768
ENSG00000173825	-1.6345	-1.43863	-2.86185	0.00583579	0.774768
ENSG00000199311	1.62054	-0.390534	2.86347	0.00583965	0.774768
ENSG00000224281	0.52914	1.72327	2.86321	0.00584415	0.774768
ENSG00000237757	0.612471	1.3651	2.86265	0.00585317	0.774768
ENSG00000272562	0.919492	0.635459	2.86031	0.00586063	0.774768
ENSG00000204256	-0.26206	7.58624	-2.85868	0.00591781	0.774768
ENSG00000278665	1.65485	-2.16499	2.85803	0.00592816	0.774768
ENSG00000126001	-0.406537	7.46612	-2.85581	0.00593385	0.774768
ENSG00000277149	-0.423464	5.49697	-2.85425	0.00595943	0.774768
ENSG00000118961	0.464323	3.47113	2.85611	0.00595971	0.774768
ENSG00000263595	2.0164	-2.60627	2.85592	0.00596287	0.774768
ENSG00000278048	1.91141	-3.47701	2.85552	0.00596936	0.774768
ENSG00000050426	0.300584	5.12727	2.85262	0.00598625	0.774768
ENSG00000115677	-0.292893	7.71947	-2.85047	0.00602195	0.775846
ENSG00000196199	-0.36044	8.15197	-2.84877	0.00605016	0.775954
ENSG00000115183	-0.324895	8.93103	-2.84024	0.00619384	0.776216
ENSG00000107581	-0.401753	8.06324	-2.83931	0.0062097	0.776216
ENSG00000126777	-0.372351	8.22515	-2.83842	0.00622481	0.776216
ENSG00000112312	0.6204	1.82568	2.83993	0.00623056	0.776216
ENSG00000240183	1.7005	-2.2592	2.83857	0.00625396	0.776216
ENSG00000204624	0.602723	3.68628	2.83429	0.00629593	0.776216
ENSG00000173404	1.59551	-0.640296	2.83342	0.00634281	0.776216
ENSG00000266844	-1.17238	3.8896	-2.83074	0.00638841	0.776216
ENSG00000154832	-0.378698	6.713	-2.82731	0.00641749	0.776216
ENSG00000137216	-0.283195	5.41133	-2.82713	0.00645285	0.776216
ENSG00000273933	-1.89377	-1.64538	-2.82461	0.00646527	0.776216
ENSG00000070814	-0.422171	6.67994	-2.82017	0.00654441	0.776216
ENSG00000237118	-1.56449	-2.24677	-2.8185	0.00657433	0.776216
ENSG00000178440	0.412092	3.5297	2.81729	0.00659613	0.776216
ENSG00000233006	0.395191	3.68009	2.81891	0.00659926	0.776216
ENSG00000185837	0.887538	0.594611	2.81697	0.00660181	0.776216
ENSG00000122965	-0.407274	8.21171	-2.8068	0.00678791	0.776216
ENSG00000117523	-0.447376	10.2456	-2.79397	0.00702938	0.776216
ENSG00000071054	-0.412474	10.8896	-2.79485	0.00704652	0.776216
ENSG00000222985	1.34491	1.996	2.79155	0.00707599	0.776216
ENSG00000153914	-0.512529	8.13995	-2.79253	0.00709118	0.776216
ENSG00000187243	1.28339	-1.61512	2.79179	0.00710496	0.776216
ENSG00000173545	-0.384205	5.20228	-2.78977	0.00711031	0.776216
ENSG00000088038	-0.428593	7.13043	-2.78916	0.00712212	0.776216
ENSG00000277449	0.860119	0.355067	2.78588	0.0071859	0.776216
ENSG00000205534	0.613104	2.9275	2.78573	0.0071888	0.776216
ENSG00000183208	0.625874	1.75492	2.7855	0.00719316	0.776216
ENSG00000279713	-1.72759	-1.80661	-2.78491	0.00720486	0.776216
ENSG00000135336	0.382609	4.41223	2.78564	0.00722473	0.776216
ENSG00000188582	1.45213	-1.9267	2.78434	0.00725048	0.776216
ENSG00000248971	-0.562842	4.00902	-2.78244	0.00725323	0.776216
ENSG00000235033	-0.784393	4.29433	-2.78383	0.00725946	0.776216
ENSG00000200564	1.71671	-1.36217	2.77958	0.00730974	0.776216
ENSG00000273384	1.63052	-2.65555	2.77571	0.00738694	0.776216
ENSG00000140829	-0.427743	7.40267	-2.77428	0.00741571	0.776216
ENSG00000186281	-1.23351	2.32433	-2.77346	0.00746675	0.776216
ENSG00000155827	-0.389674	6.54489	-2.76922	0.00751806	0.776216
ENSG00000272163	0.90889	0.655519	2.77016	0.00753403	0.776216
ENSG00000278581	-1.74484	-2.67804	-2.76883	0.00756008	0.776216
ENSG00000201210	-1.87306	-3.16778	-2.76743	0.00758874	0.776216
ENSG00000231851	-1.65976	-1.38306	-2.76525	0.00759919	0.776216
ENSG00000177133	0.952343	2.60971	2.7641	0.00762275	0.776216
ENSG00000268030	-1.82718	-2.37464	-2.76329	0.00763956	0.776216
ENSG00000207816	1.72307	-1.50702	2.76296	0.00764635	0.776216
ENSG00000239726	1.52118	-2.42519	2.76341	0.00767256	0.776216
ENSG00000144029	-0.381414	7.5817	-2.76124	0.00768202	0.776216
ENSG00000279266	-1.38165	-0.0514885	-2.76106	0.00768573	0.776216
ENSG00000258824	0.662079	1.12608	2.76055	0.00769644	0.776216
ENSG00000257220	-1.80552	-3.45526	-2.75941	0.0077201	0.776216
ENSG00000261529	0.681738	1.49003	2.75814	0.00774666	0.776216
ENSG00000148337	-0.368329	7.18687	-2.75656	0.00777968	0.776216
ENSG00000276030	1.15552	-1.15149	2.75817	0.00778114	0.776216
ENSG00000157087	0.688981	5.56904	2.7562	0.00778732	0.776216
ENSG00000069275	-0.401156	6.90167	-2.75614	0.00778853	0.776216
ENSG00000285984	1.66806	-3.18644	2.75563	0.00779928	0.776216
ENSG00000162928	0.276969	4.1802	2.75478	0.00781729	0.776216
ENSG00000266826	-1.92232	-2.70007	-2.75439	0.0078254	0.776216
ENSG00000221333	1.20349	-2.07027	2.75396	0.00783457	0.776216
ENSG00000124279	0.659017	2.47475	2.75362	0.00784173	0.776216
ENSG00000278879	1.01972	0.637799	2.74599	0.00800475	0.776216
ENSG00000260493	0.870222	0.229139	2.74759	0.008006	0.776216
ENSG00000241886	0.698569	0.246406	2.74692	0.00802047	0.776216
ENSG00000201143	1.57955	-0.766798	2.74477	0.0080311	0.776216
ENSG00000267546	0.882435	0.140823	2.74401	0.00804748	0.776216
ENSG00000160299	-0.433842	8.87943	-2.74328	0.00806334	0.776216
ENSG00000173141	0.42632	2.62881	2.74296	0.00807037	0.776216
ENSG00000284024	0.347181	3.52566	2.74275	0.00807479	0.776216
ENSG00000183775	0.552921	3.09965	2.74287	0.00810889	0.776216
ENSG00000105726	-0.252784	6.44558	-2.7404	0.00812607	0.776216
ENSG00000164023	0.678545	0.959609	2.7416	0.00813652	0.776216
ENSG00000278974	1.61053	-1.96624	2.73936	0.00814874	0.776216
ENSG00000222076	1.46051	1.27688	2.73827	0.00817282	0.776216
ENSG00000224592	1.46573	-1.64169	2.73799	0.00817886	0.776216
ENSG00000221643	0.810439	1.72097	2.73798	0.0081791	0.776216
ENSG00000250116	-1.8189	-2.46911	-2.73798	0.00817922	0.776216
ENSG00000213197	-0.621773	7.91059	-2.73715	0.00823443	0.776216
ENSG00000228336	1.49886	-3.09148	2.73133	0.00832659	0.776216
ENSG00000254377	1.15918	1.81221	2.73262	0.00833459	0.776216
ENSG00000286086	0.645946	1.03501	2.73117	0.00836725	0.776216
ENSG00000101079	0.354717	4.43267	2.72694	0.00842534	0.776216
ENSG00000282100	-0.477448	5.91644	-2.72839	0.00842996	0.776216
ENSG00000167371	0.652742	2.97169	2.72828	0.00843257	0.776216
ENSG00000001497	-0.328568	7.38188	-2.72461	0.00847817	0.776216
ENSG00000279059	0.498855	2.85515	2.72445	0.00848169	0.776216
ENSG00000285799	0.762303	1.72214	2.7258	0.00848863	0.776216
ENSG00000237689	1.31949	-1.81288	2.72561	0.00849236	0.776216
ENSG00000203801	0.628806	2.0446	2.72081	0.00856485	0.776216
ENSG00000212951	1.5932	-2.70681	2.72013	0.00858056	0.776216
ENSG00000102468	1.39533	-1.32519	2.72006	0.00858213	0.776216
ENSG00000285162	1.22506	-1.73854	2.71752	0.00864071	0.776216
ENSG00000164616	1.87913	-2.65686	2.71861	0.00865326	0.776216
ENSG00000155506	-0.243565	7.56071	-2.71683	0.00865658	0.776216
ENSG00000204792	-1.82824	-2.75494	-2.71613	0.00867283	0.776216
ENSG00000144852	1.53039	-1.70588	2.71458	0.00870895	0.776216
ENSG00000124440	1.04546	5.43191	2.7153	0.0087302	0.776216
ENSG00000257551	1.56742	-2.00443	2.71192	0.00877093	0.776216
ENSG00000132300	0.241944	6.83143	2.71313	0.00878109	0.776216
ENSG00000138398	-0.461098	7.21024	-2.70879	0.00884481	0.776216
ENSG00000140350	-0.327934	7.11756	-2.70712	0.00892283	0.776216
ENSG00000187123	1.24777	0.720253	2.70675	0.00893167	0.776216
ENSG00000201331	1.50405	0.986653	2.70617	0.00894544	0.776216
ENSG00000254048	1.23969	-0.812685	2.70177	0.009012	0.776216
ENSG00000266490	0.661285	2.25406	2.70117	0.00902638	0.776216
ENSG00000200922	1.23068	-2.63577	2.70105	0.00902942	0.776216
ENSG00000130988	0.826833	3.61698	2.69949	0.00906697	0.776216
ENSG00000168778	0.447997	2.65532	2.70082	0.00907397	0.776216
ENSG00000222024	-1.64948	-1.8813	-2.69551	0.00916369	0.776216
ENSG00000130054	0.830262	0.291939	2.69465	0.00922388	0.776216
ENSG00000179029	0.599364	1.12025	2.69008	0.00929698	0.776216
ENSG00000266017	0.810417	1.67204	2.68634	0.00939008	0.776216
ENSG00000242258	1.50656	0.222974	2.68589	0.00940121	0.776216
ENSG00000116580	-0.306031	8.14594	-2.68586	0.00940195	0.776216
ENSG00000198026	-0.323406	6.05929	-2.68714	0.00940988	0.776216
ENSG00000172671	0.321368	4.94332	2.68468	0.00943157	0.776216
ENSG00000238061	-0.590297	1.90482	-2.68434	0.00944001	0.776216
ENSG00000286071	-1.52137	0.706105	-2.6824	0.00948884	0.776216
ENSG00000131711	-0.433308	9.50484	-2.68206	0.00949725	0.776216
ENSG00000249772	-1.59734	-1.75875	-2.68186	0.00950237	0.776216
ENSG00000042445	0.312769	4.40095	2.67843	0.00958936	0.776216
ENSG00000261146	2.13399	-2.7409	2.67792	0.00960236	0.776216
ENSG00000146909	-0.420415	6.40571	-2.67587	0.00965468	0.776216
ENSG00000196932	1.2066	1.27827	2.67723	0.00966011	0.776216
ENSG00000164326	1.60615	-2.95379	2.67521	0.00967159	0.776216
ENSG00000135525	-0.458122	10.4967	-2.67577	0.00969757	0.776216
ENSG00000172361	-0.664803	4.37405	-2.67386	0.0097063	0.776216
ENSG00000201679	1.68257	-1.08125	2.67343	0.00971729	0.776216
ENSG00000207031	1.24826	1.75496	2.67297	0.00972911	0.776216
ENSG00000134884	-0.432274	10.2676	-2.67292	0.00973046	0.776216
ENSG00000146267	0.546142	2.72176	2.67416	0.00973907	0.776216
ENSG00000108312	-0.344749	6.98334	-2.66901	0.00987267	0.776216
ENSG00000165409	-1.54352	-0.865309	-2.6668	0.00988935	0.776216
ENSG00000264843	-1.25596	-0.736586	-2.66626	0.00990344	0.776216
ENSG00000266524	1.43134	-1.1244	2.66693	0.00992699	0.776216
ENSG00000142599	-0.286806	8.51147	-2.66502	0.00993603	0.776216
ENSG00000224613	1.46295	-3.03102	2.66518	0.00997283	0.776216
ENSG00000257246	0.445365	3.10373	2.66103	0.0100414	0.776216
ENSG00000248710	-1.68724	-1.51227	-2.66133	0.0100715	0.776216
ENSG00000244036	-1.72308	-2.6178	-2.65973	0.0100761	0.776216
ENSG00000226314	0.544132	4.36947	2.65788	0.0101254	0.776216
ENSG00000255043	-1.25557	0.447403	-2.65785	0.0101262	0.776216
ENSG00000243702	1.48907	-2.84492	2.6574	0.0101382	0.776216
ENSG00000126870	-0.427271	7.82383	-2.65674	0.010156	0.776216
ENSG00000261485	0.565534	2.28246	2.65792	0.0101657	0.776216
ENSG00000109111	-0.349314	8.34969	-2.65565	0.0101851	0.776216
ENSG00000280828	-0.45009	4.56713	-2.65481	0.0102489	0.776216
ENSG00000241529	1.32897	-2.028	2.65259	0.0102677	0.776216
ENSG00000143198	0.48122	5.32013	2.65189	0.0102867	0.776216
ENSG00000276489	1.67035	-2.60967	2.6508	0.0103162	0.776216
ENSG00000257674	-1.31508	-0.151096	-2.64965	0.0103477	0.776216
ENSG00000151470	0.377118	2.94576	2.64953	0.0103508	0.776216
ENSG00000166482	1.51723	-1.39426	2.64905	0.0103639	0.776216
ENSG00000181513	0.428355	3.39552	2.64931	0.0103987	0.776216
ENSG00000252980	1.21411	-2.3178	2.64673	0.0104276	0.776216
ENSG00000255517	0.749286	0.897698	2.64588	0.0104509	0.776216
ENSG00000271631	1.32115	-1.9672	2.64575	0.0104544	0.776216
ENSG00000226676	1.28785	-1.47646	2.64593	0.0104902	0.776216
ENSG00000165733	-0.332053	7.13252	-2.64438	0.0104924	0.776216
ENSG00000260036	1.38061	-2.78242	2.64437	0.0104926	0.776216
ENSG00000225215	-0.570942	3.67749	-2.6439	0.0105057	0.776216
ENSG00000149050	0.59625	1.94419	2.64375	0.0105096	0.776216
ENSG00000052749	-0.336485	4.66298	-2.64336	0.0105205	0.776216
ENSG00000091527	-0.358982	5.83002	-2.63989	0.010617	0.776216
ENSG00000255553	1.46269	-2.42128	2.63681	0.0107033	0.776216
ENSG00000273559	-0.354745	5.47722	-2.63667	0.0107074	0.776216
ENSG00000272509	1.06835	-1.67692	2.63794	0.0107134	0.776216
ENSG00000229847	0.991755	1.40484	2.63676	0.0107473	0.776216
ENSG00000258732	1.91148	1.05788	2.63466	0.0108066	0.776216
ENSG00000268744	1.24514	-2.48144	2.63279	0.010817	0.776216
ENSG00000273272	-1.8188	-2.9345	-2.63315	0.0108488	0.776216
ENSG00000205238	-1.59402	-0.762515	-2.63159	0.010851	0.776216
ENSG00000221740	1.48603	-2.99787	2.63022	0.0108902	0.776216
ENSG00000225885	-1.68271	-2.30623	-2.63124	0.0109017	0.776216
ENSG00000152240	0.478079	2.64438	2.62913	0.0109212	0.776216
ENSG00000204381	-0.44138	4.76265	-2.63001	0.0109391	0.776216
ENSG00000224672	1.06587	-0.179995	2.62762	0.0109647	0.776216
ENSG00000180730	0.841794	1.14435	2.62618	0.0110061	0.776216
ENSG00000160633	-0.351329	8.7182	-2.62377	0.011076	0.776216
ENSG00000140876	0.593394	1.1256	2.62109	0.0111538	0.776216
ENSG00000272234	-1.91541	-1.18384	-2.62027	0.0111779	0.776216
ENSG00000094963	1.48751	0.0320813	2.62114	0.0111944	0.776216
ENSG00000187514	-0.437733	7.99925	-2.6179	0.0112475	0.776216
ENSG00000274727	1.58353	-3.48426	2.61927	0.0112508	0.776216
ENSG00000129596	0.578294	1.81579	2.61763	0.0112555	0.776216
ENSG00000267594	2.33068	0.78307	2.61731	0.0112648	0.776216
ENSG00000222790	1.14074	-1.88256	2.61432	0.0113533	0.776216
ENSG00000123240	-0.446276	6.75837	-2.61551	0.0113619	0.776216
ENSG00000126838	-1.39454	-0.510662	-2.61236	0.0114116	0.776216
ENSG00000180875	1.83433	-0.857266	2.61344	0.0114232	0.776216
ENSG00000279106	0.690832	1.08496	2.61268	0.0114453	0.776216
ENSG00000255284	0.412006	2.9677	2.61245	0.0114529	0.776216
ENSG00000137337	-0.398345	7.38541	-2.61036	0.0114714	0.776216
ENSG00000230149	-1.02778	0.140786	-2.60987	0.011486	0.776216
ENSG00000280039	1.3512	-0.584624	2.6094	0.0115002	0.776216
ENSG00000185298	-0.379118	4.01263	-2.60773	0.0115505	0.776216
ENSG00000076685	0.311058	6.76954	2.60908	0.0115541	0.776216
ENSG00000235683	-0.510979	3.47677	-2.60731	0.0115632	0.776216
ENSG00000244642	1.34289	0.637431	2.60719	0.0115666	0.776216
ENSG00000252658	0.942656	0.0286297	2.60697	0.0115735	0.776216
ENSG00000178531	1.39519	-1.63925	2.60826	0.0115789	0.776216
ENSG00000214875	1.02867	-1.01282	2.60627	0.0115944	0.776216
ENSG00000101180	1.31378	-1.96338	2.60763	0.0115973	0.776216
ENSG00000204356	-0.348855	5.42492	-2.60507	0.0116309	0.776216
ENSG00000223001	1.73666	-2.59574	2.60273	0.011702	0.776216
ENSG00000279648	-1.63363	-2.14803	-2.60094	0.0117568	0.776216
ENSG00000256577	1.13631	0.350081	2.60225	0.011761	0.776216
ENSG00000174891	-0.407147	6.38664	-2.5996	0.011798	0.776216
ENSG00000225506	1.4536	-2.0966	2.60086	0.011804	0.776216
ENSG00000187066	-1.58794	-0.582333	-2.59875	0.0118242	0.776216
ENSG00000087087	-0.358792	7.72642	-2.59798	0.011848	0.776216
ENSG00000242337	0.359144	3.17203	2.59788	0.011851	0.776216
ENSG00000280650	0.786837	4.62168	2.59732	0.0119133	0.776216
ENSG00000261094	0.6048	2.15214	2.59308	0.0119999	0.776216
ENSG00000286207	-0.773793	1.38072	-2.59287	0.0120065	0.776216
ENSG00000088538	-0.410132	9.28772	-2.59262	0.0120598	0.776216
ENSG00000183258	-0.377072	5.50781	-2.59099	0.0120652	0.776216
ENSG00000161958	0.967605	-0.659428	2.59073	0.0120734	0.776216
ENSG00000145220	-0.364096	4.50076	-2.59045	0.0121273	0.776216
ENSG00000240401	-1.11605	1.1502	-2.58879	0.0121345	0.776216
ENSG00000215912	0.497763	2.10153	2.58972	0.0121507	0.776216
[truncated: 27,904 more rows]

## Sheet: E
Pathways analysis of SCZ vs Control FDR < 0.05
[truncated: 560 more rows]

[truncated: 4 more sheets: F, G, H, I]
