# Supplementary material for: Downregulated transcription in chromosomal domains of midbrain dopamine neurons linked to schizophrenia.
Source: Research Square preprint supplement (doi:10.21203/rs.3.rs-5354582/v1), 2024-11-08
Supplement: Supplementary file 4 [file a189352229838920e8c3078a.xlsx]

## Sheet: A
Transcript analysis of SCZ vs Controls in Dopa Neurons using RE2C
Gene ID	Tx ID	RE2C.features	RE2C.stat	RE2C.het.stat	RE2C.P.Value	RE.adj.P.Val
ENSG00000000003	ENST00000496771	2	0.623495	0	0.487303	0.849634
ENSG00000000003	ENST00000612152	2	0.623495	0	0.487303	0.849634
ENSG00000000005	ENST00000373031	1	0.152621	0	0.697348	0.927438
ENSG00000000457	ENST00000423670	3	1.09781	0	0.359476	0.786911
ENSG00000000457	ENST00000367771	3	1.09781	0	0.359476	0.786911
ENSG00000000457	ENST00000470238	3	1.09781	0	0.359476	0.786911
ENSG00000000460	ENST00000498289	3	0.352905	0	0.623075	0.902535
ENSG00000000460	ENST00000286031	3	0.352905	0	0.623075	0.902535
ENSG00000000460	ENST00000472795	3	0.352905	0	0.623075	0.902535
ENSG00000000938	ENST00000374004	3	3.23587	0.787884	0.0757042	0.48512
ENSG00000000938	ENST00000374003	3	3.23587	0.787884	0.0757042	0.48512
ENSG00000000938	ENST00000475472	3	3.23587	0.787884	0.0757042	0.48512
ENSG00000000971	ENST00000496761	2	7.55719	0	0.0101991	0.230441
ENSG00000000971	ENST00000466229	2	7.55719	0	0.0101991	0.230441
ENSG00000001036	ENST00000451668	2	0.536232	0	0.514657	0.861368
ENSG00000001036	ENST00000002165	2	0.536232	0	0.514657	0.861368
ENSG00000001084	ENST00000514373	8	1.95993	0.519549	0.18031	0.641755
ENSG00000001084	ENST00000514933	8	1.95993	0.519549	0.18031	0.641755
ENSG00000001084	ENST00000515580	8	1.95993	0.519549	0.18031	0.641755
ENSG00000001084	ENST00000510837	8	1.95993	0.519549	0.18031	0.641755
ENSG00000001084	ENST00000509541	8	1.95993	0.519549	0.18031	0.641755
ENSG00000001084	ENST00000505294	8	1.95993	0.519549	0.18031	0.641755
ENSG00000001084	ENST00000616923	8	1.95993	0.519549	0.18031	0.641755
ENSG00000001084	ENST00000514004	8	1.95993	0.519549	0.18031	0.641755
ENSG00000001167	ENST00000341376	1	3.8621	0	0.0537588	0.43032
ENSG00000001460	ENST00000435187	5	2.38673	0.327402	0.154772	0.613231
ENSG00000001460	ENST00000497384	5	2.38673	0.327402	0.154772	0.613231
ENSG00000001460	ENST00000483528	5	2.38673	0.327402	0.154772	0.613231
ENSG00000001460	ENST00000468303	5	2.38673	0.327402	0.154772	0.613231
ENSG00000001460	ENST00000475760	5	2.38673	0.327402	0.154772	0.613231
ENSG00000001461	ENST00000358028	5	0.138611	0	0.78775	0.953934
ENSG00000001461	ENST00000003912	5	0.138611	0	0.78775	0.953934
ENSG00000001461	ENST00000488155	5	0.138611	0	0.78775	0.953934
ENSG00000001461	ENST00000475663	5	0.138611	0	0.78775	0.953934
ENSG00000001461	ENST00000432012	5	0.138611	0	0.78775	0.953934
ENSG00000001497	ENST00000484069	2	0.958183	0	0.391038	0.803825
ENSG00000001497	ENST00000469091	2	0.958183	0	0.391038	0.803825
ENSG00000001561	ENST00000321037	1	0.726234	0	0.39732	0.806152
ENSG00000001617	ENST00000426511	6	0.257711	0	0.708338	0.929707
ENSG00000001617	ENST00000450338	6	0.257711	0	0.708338	0.929707
ENSG00000001617	ENST00000470737	6	0.257711	0	0.708338	0.929707
ENSG00000001617	ENST00000434342	6	0.257711	0	0.708338	0.929707
ENSG00000001617	ENST00000002829	6	0.257711	0	0.708338	0.929707
ENSG00000001617	ENST00000493743	6	0.257711	0	0.708338	0.929707
ENSG00000001626	ENST00000446805	1	0.152405	0	0.697552	0.927456
ENSG00000001629	ENST00000413588	6	1.57819	0	0.295546	0.741662
ENSG00000001629	ENST00000265742	6	1.57819	0	0.295546	0.741662
ENSG00000001629	ENST00000442183	6	1.57819	0	0.295546	0.741662
ENSG00000001629	ENST00000486698	6	1.57819	0	0.295546	0.741662
ENSG00000001629	ENST00000465883	6	1.57819	0	0.295546	0.741662
ENSG00000001629	ENST00000439883	6	1.57819	0	0.295546	0.741662
ENSG00000001630	ENST00000003100	3	0.14264	0	0.757329	0.944266
ENSG00000001630	ENST00000450723	3	0.14264	0	0.757329	0.944266
ENSG00000001630	ENST00000482924	3	0.14264	0	0.757329	0.944266
ENSG00000001631	ENST00000394507	4	1.05181	0.130633	0.352965	0.782215
ENSG00000001631	ENST00000470309	4	1.05181	0.130633	0.352965	0.782215
ENSG00000001631	ENST00000487168	4	1.05181	0.130633	0.352965	0.782215
ENSG00000001631	ENST00000486261	4	1.05181	0.130633	0.352965	0.782215
ENSG00000002016	ENST00000358495	5	1.81279	0	0.251853	0.710159
ENSG00000002016	ENST00000542297	5	1.81279	0	0.251853	0.710159
ENSG00000002016	ENST00000536177	5	1.81279	0	0.251853	0.710159
ENSG00000002016	ENST00000542785	5	1.81279	0	0.251853	0.710159
ENSG00000002016	ENST00000488642	5	1.81279	0	0.251853	0.710159
ENSG00000002079	ENST00000439784	1	0.418145	0	0.520191	0.863235
ENSG00000002330	ENST00000493798	4	0.378895	0.0262472	0.61656	0.900165
ENSG00000002330	ENST00000544271	4	0.378895	0.0262472	0.61656	0.900165
ENSG00000002330	ENST00000492141	4	0.378895	0.0262472	0.61656	0.900165
ENSG00000002330	ENST00000394532	4	0.378895	0.0262472	0.61656	0.900165
ENSG00000002549	ENST00000508497	6	0.464584	0	0.60464	0.896096
ENSG00000002549	ENST00000512397	6	0.464584	0	0.60464	0.896096
ENSG00000002549	ENST00000508014	6	0.464584	0	0.60464	0.896096
ENSG00000002549	ENST00000504614	6	0.464584	0	0.60464	0.896096
ENSG00000002549	ENST00000509583	6	0.464584	0	0.60464	0.896096
ENSG00000002549	ENST00000503467	6	0.464584	0	0.60464	0.896096
ENSG00000002587	ENST00000514690	2	0.207451	0	0.702572	0.928639
ENSG00000002587	ENST00000002596	2	0.207451	0	0.702572	0.928639
ENSG00000002745	ENST00000222462	1	1.96564	0	0.165773	0.624502
ENSG00000002746	ENST00000395891	8	1.54425	0.173671	0.286656	0.735031
ENSG00000002746	ENST00000471527	8	1.54425	0.173671	0.286656	0.735031
ENSG00000002746	ENST00000429529	8	1.54425	0.173671	0.286656	0.735031
ENSG00000002746	ENST00000481031	8	1.54425	0.173671	0.286656	0.735031
ENSG00000002746	ENST00000471043	8	1.54425	0.173671	0.286656	0.735031
ENSG00000002746	ENST00000493057	8	1.54425	0.173671	0.286656	0.735031
ENSG00000002746	ENST00000461842	8	1.54425	0.173671	0.286656	0.735031
ENSG00000002746	ENST00000492310	8	1.54425	0.173671	0.286656	0.735031
ENSG00000002822	ENST00000491858	18	0.00513471	3.4377	0.110232	0.552949
ENSG00000002822	ENST00000450235	18	0.00513471	3.4377	0.110232	0.552949
ENSG00000002822	ENST00000483165	18	0.00513471	3.4377	0.110232	0.552949
ENSG00000002822	ENST00000265854	18	0.00513471	3.4377	0.110232	0.552949
ENSG00000002822	ENST00000444373	18	0.00513471	3.4377	0.110232	0.552949
ENSG00000002822	ENST00000464742	18	0.00513471	3.4377	0.110232	0.552949
ENSG00000002822	ENST00000486340	18	0.00513471	3.4377	0.110232	0.552949
ENSG00000002822	ENST00000469871	18	0.00513471	3.4377	0.110232	0.552949
ENSG00000002822	ENST00000402746	18	0.00513471	3.4377	0.110232	0.552949
ENSG00000002822	ENST00000445959	18	0.00513471	3.4377	0.110232	0.552949
ENSG00000002822	ENST00000437877	18	0.00513471	3.4377	0.110232	0.552949
ENSG00000002822	ENST00000421113	18	0.00513471	3.4377	0.110232	0.552949
ENSG00000002822	ENST00000438959	18	0.00513471	3.4377	0.110232	0.552949
ENSG00000002822	ENST00000481633	18	0.00513471	3.4377	0.110232	0.552949
ENSG00000002822	ENST00000429625	18	0.00513471	3.4377	0.110232	0.552949
ENSG00000002822	ENST00000459731	18	0.00513471	3.4377	0.110232	0.552949
ENSG00000002822	ENST00000496548	18	0.00513471	3.4377	0.110232	0.552949
ENSG00000002822	ENST00000406869	18	0.00513471	3.4377	0.110232	0.552949
ENSG00000002834	ENST00000579123	5	0.980762	0	0.424501	0.82179
ENSG00000002834	ENST00000584106	5	0.980762	0	0.424501	0.82179
ENSG00000002834	ENST00000443937	5	0.980762	0	0.424501	0.82179
ENSG00000002834	ENST00000581485	5	0.980762	0	0.424501	0.82179
ENSG00000002834	ENST00000419929	5	0.980762	0	0.424501	0.82179
ENSG00000002919	ENST00000393405	5	0.946904	0.198205	0.376411	0.795359
ENSG00000002919	ENST00000584335	5	0.946904	0.198205	0.376411	0.795359
ENSG00000002919	ENST00000577310	5	0.946904	0.198205	0.376411	0.795359
ENSG00000002919	ENST00000580875	5	0.946904	0.198205	0.376411	0.795359
ENSG00000002919	ENST00000582481	5	0.946904	0.198205	0.376411	0.795359
ENSG00000002933	ENST00000462826	1	0.50007	0	0.482052	0.846813
ENSG00000003056	ENST00000536844	6	0.0816473	0	0.838176	0.968406
ENSG00000003056	ENST00000543159	6	0.0816473	0	0.838176	0.968406
ENSG00000003056	ENST00000537621	6	0.0816473	0	0.838176	0.968406
ENSG00000003056	ENST00000540837	6	0.0816473	0	0.838176	0.968406
ENSG00000003056	ENST00000543258	6	0.0816473	0	0.838176	0.968406
ENSG00000003056	ENST00000543834	6	0.0816473	0	0.838176	0.968406
ENSG00000003096	ENST00000371876	3	0.0289617	0	0.902789	0.986374
ENSG00000003096	ENST00000262820	3	0.0289617	0	0.902789	0.986374
ENSG00000003096	ENST00000469946	3	0.0289617	0	0.902789	0.986374
ENSG00000003137	ENST00000001146	3	0.0393108	0.00110678	0.885907	0.981656
ENSG00000003137	ENST00000412253	3	0.0393108	0.00110678	0.885907	0.981656
ENSG00000003137	ENST00000461519	3	0.0393108	0.00110678	0.885907	0.981656
ENSG00000003147	ENST00000470696	7	1.01908	-0.381202	0.540659	0.871088
ENSG00000003147	ENST00000457755	7	1.01908	-0.381202	0.540659	0.871088
ENSG00000003147	ENST00000455539	7	1.01908	-0.381202	0.540659	0.871088
ENSG00000003147	ENST00000490041	7	1.01908	-0.381202	0.540659	0.871088
ENSG00000003147	ENST00000476942	7	1.01908	-0.381202	0.540659	0.871088
ENSG00000003147	ENST00000407906	7	1.01908	-0.381202	0.540659	0.871088
ENSG00000003147	ENST00000422063	7	1.01908	-0.381202	0.540659	0.871088
ENSG00000003249	ENST00000623401	5	8.55425	0	0.00679473	0.198458
ENSG00000003249	ENST00000568838	5	8.55425	0	0.00679473	0.198458
ENSG00000003249	ENST00000568330	5	8.55425	0	0.00679473	0.198458
ENSG00000003249	ENST00000392973	5	8.55425	0	0.00679473	0.198458
ENSG00000003249	ENST00000002501	5	8.55425	0	0.00679473	0.198458
ENSG00000003393	ENST00000482891	11	0.037883	0	0.896559	0.984715
ENSG00000003393	ENST00000483703	11	0.037883	0	0.896559	0.984715
ENSG00000003393	ENST00000410052	11	0.037883	0	0.896559	0.984715
ENSG00000003393	ENST00000496244	11	0.037883	0	0.896559	0.984715
ENSG00000003393	ENST00000489440	11	0.037883	0	0.896559	0.984715
ENSG00000003393	ENST00000439495	11	0.037883	0	0.896559	0.984715
ENSG00000003393	ENST00000482789	11	0.037883	0	0.896559	0.984715
ENSG00000003393	ENST00000462747	11	0.037883	0	0.896559	0.984715
ENSG00000003393	ENST00000409632	11	0.037883	0	0.896559	0.984715
ENSG00000003393	ENST00000264276	11	0.037883	0	0.896559	0.984715
ENSG00000003393	ENST00000467448	11	0.037883	0	0.896559	0.984715
ENSG00000003400	ENST00000374650	1	5.19023	0	0.0260828	0.340484
ENSG00000003402	ENST00000309955	13	7.84368	1.92856	0.00429268	0.163957
ENSG00000003402	ENST00000470664	13	7.84368	1.92856	0.00429268	0.163957
ENSG00000003402	ENST00000439154	13	7.84368	1.92856	0.00429268	0.163957
ENSG00000003402	ENST00000474842	13	7.84368	1.92856	0.00429268	0.163957
ENSG00000003402	ENST00000395148	13	7.84368	1.92856	0.00429268	0.163957
ENSG00000003402	ENST00000490965	13	7.84368	1.92856	0.00429268	0.163957
ENSG00000003402	ENST00000494258	13	7.84368	1.92856	0.00429268	0.163957
ENSG00000003402	ENST00000342795	13	7.84368	1.92856	0.00429268	0.163957
ENSG00000003402	ENST00000433445	13	7.84368	1.92856	0.00429268	0.163957
ENSG00000003402	ENST00000457277	13	7.84368	1.92856	0.00429268	0.163957
ENSG00000003402	ENST00000441224	13	7.84368	1.92856	0.00429268	0.163957
ENSG00000003402	ENST00000423241	13	7.84368	1.92856	0.00429268	0.163957
ENSG00000003402	ENST00000425030	13	7.84368	1.92856	0.00429268	0.163957
ENSG00000003436	ENST00000481132	1	14.009	0	0.000393359	0.052442
ENSG00000003509	ENST00000441905	3	2.62535	0	0.146675	0.602629
ENSG00000003509	ENST00000432075	3	2.62535	0	0.146675	0.602629
ENSG00000003509	ENST00000419278	3	2.62535	0	0.146675	0.602629
ENSG00000003756	ENST00000469838	14	0.676912	-0.232957	0.621972	0.902424
ENSG00000003756	ENST00000395174	14	0.676912	-0.232957	0.621972	0.902424
ENSG00000003756	ENST00000489437	14	0.676912	-0.232957	0.621972	0.902424
ENSG00000003756	ENST00000494360	14	0.676912	-0.232957	0.621972	0.902424
ENSG00000003756	ENST00000471995	14	0.676912	-0.232957	0.621972	0.902424
ENSG00000003756	ENST00000475128	14	0.676912	-0.232957	0.621972	0.902424
ENSG00000003756	ENST00000479275	14	0.676912	-0.232957	0.621972	0.902424
ENSG00000003756	ENST00000441305	14	0.676912	-0.232957	0.621972	0.902424
ENSG00000003756	ENST00000492472	14	0.676912	-0.232957	0.621972	0.902424
ENSG00000003756	ENST00000464087	14	0.676912	-0.232957	0.621972	0.902424
ENSG00000003756	ENST00000461242	14	0.676912	-0.232957	0.621972	0.902424
ENSG00000003756	ENST00000437500	14	0.676912	-0.232957	0.621972	0.902424
ENSG00000003756	ENST00000474470	14	0.676912	-0.232957	0.621972	0.902424
ENSG00000003756	ENST00000438369	14	0.676912	-0.232957	0.621972	0.902424
ENSG00000003987	ENST00000519763	7	1.45361	0	0.327417	0.764448
ENSG00000003987	ENST00000523571	7	1.45361	0	0.327417	0.764448
ENSG00000003987	ENST00000180173	7	1.45361	0	0.327417	0.764448
ENSG00000003987	ENST00000519122	7	1.45361	0	0.327417	0.764448
ENSG00000003987	ENST00000521857	7	1.45361	0	0.327417	0.764448
ENSG00000003987	ENST00000521177	7	1.45361	0	0.327417	0.764448
ENSG00000003987	ENST00000518272	7	1.45361	0	0.327417	0.764448
ENSG00000004059	ENST00000459680	3	1.0912	0	0.369957	0.792841
ENSG00000004059	ENST00000467281	3	1.0912	0	0.369957	0.792841
ENSG00000004059	ENST00000463733	3	1.0912	0	0.369957	0.792841
ENSG00000004139	ENST00000379061	6	0.0634991	0	0.861102	0.976134
ENSG00000004139	ENST00000585453	6	0.0634991	0	0.861102	0.976134
ENSG00000004139	ENST00000577870	6	0.0634991	0	0.861102	0.976134
ENSG00000004139	ENST00000582323	6	0.0634991	0	0.861102	0.976134
ENSG00000004139	ENST00000585482	6	0.0634991	0	0.861102	0.976134
ENSG00000004139	ENST00000580711	6	0.0634991	0	0.861102	0.976134
ENSG00000004142	ENST00000540200	1	0.0460279	0	0.830812	0.966286
ENSG00000004399	ENST00000508630	9	11.4266	1.3433	0.000925128	0.0844495
ENSG00000004399	ENST00000512807	9	11.4266	1.3433	0.000925128	0.0844495
ENSG00000004399	ENST00000504767	9	11.4266	1.3433	0.000925128	0.0844495
ENSG00000004399	ENST00000501038	9	11.4266	1.3433	0.000925128	0.0844495
ENSG00000004399	ENST00000506979	9	11.4266	1.3433	0.000925128	0.0844495
ENSG00000004399	ENST00000324093	9	11.4266	1.3433	0.000925128	0.0844495
ENSG00000004399	ENST00000514990	9	11.4266	1.3433	0.000925128	0.0844495
ENSG00000004399	ENST00000504524	9	11.4266	1.3433	0.000925128	0.0844495
ENSG00000004399	ENST00000504979	9	11.4266	1.3433	0.000925128	0.0844495
ENSG00000004455	ENST00000491241	6	0.0137713	-0.838178	1	1
ENSG00000004455	ENST00000548559	6	0.0137713	-0.838178	1	1
ENSG00000004455	ENST00000469238	6	0.0137713	-0.838178	1	1
ENSG00000004455	ENST00000487289	6	0.0137713	-0.838178	1	1
ENSG00000004455	ENST00000551979	6	0.0137713	-0.838178	1	1
ENSG00000004455	ENST00000482191	6	0.0137713	-0.838178	1	1
ENSG00000004468	ENST00000511430	2	10.2261	0	0.0025592	0.128349
ENSG00000004468	ENST00000226279	2	10.2261	0	0.0025592	0.128349
ENSG00000004478	ENST00000543037	5	1.24501	0.17372	0.315858	0.758986
ENSG00000004478	ENST00000538622	5	1.24501	0.17372	0.315858	0.758986
ENSG00000004478	ENST00000539181	5	1.24501	0.17372	0.315858	0.758986
ENSG00000004478	ENST00000001008	5	1.24501	0.17372	0.315858	0.758986
ENSG00000004478	ENST00000540260	5	1.24501	0.17372	0.315858	0.758986
ENSG00000004487	ENST00000494920	4	0.227748	0	0.713685	0.931323
ENSG00000004487	ENST00000481879	4	0.227748	0	0.713685	0.931323
ENSG00000004487	ENST00000400181	4	0.227748	0	0.713685	0.931323
ENSG00000004487	ENST00000602503	4	0.227748	0	0.713685	0.931323
ENSG00000004534	ENST00000464013	12	0.212108	0	0.74785	0.941504
ENSG00000004534	ENST00000446471	12	0.212108	0	0.74785	0.941504
ENSG00000004534	ENST00000441115	12	0.212108	0	0.74785	0.941504
ENSG00000004534	ENST00000466247	12	0.212108	0	0.74785	0.941504
ENSG00000004534	ENST00000483350	12	0.212108	0	0.74785	0.941504
ENSG00000004534	ENST00000438912	12	0.212108	0	0.74785	0.941504
ENSG00000004534	ENST00000488807	12	0.212108	0	0.74785	0.941504
ENSG00000004534	ENST00000478026	12	0.212108	0	0.74785	0.941504
ENSG00000004534	ENST00000433811	12	0.212108	0	0.74785	0.941504
ENSG00000004534	ENST00000493652	12	0.212108	0	0.74785	0.941504
ENSG00000004534	ENST00000421682	12	0.212108	0	0.74785	0.941504
ENSG00000004534	ENST00000454079	12	0.212108	0	0.74785	0.941504
ENSG00000004660	ENST00000381769	3	0.0366773	0	0.883327	0.980507
ENSG00000004660	ENST00000573483	3	0.0366773	0	0.883327	0.980507
ENSG00000004660	ENST00000158166	3	0.0366773	0	0.883327	0.980507
ENSG00000004700	ENST00000444129	1	4.10922	0	0.0468456	0.409367
ENSG00000004766	ENST00000480943	12	0.727014	3.35989	0.0770448	0.48893
ENSG00000004766	ENST00000476413	12	0.727014	3.35989	0.0770448	0.48893
ENSG00000004766	ENST00000471188	12	0.727014	3.35989	0.0770448	0.48893
ENSG00000004766	ENST00000477572	12	0.727014	3.35989	0.0770448	0.48893
ENSG00000004766	ENST00000474412	12	0.727014	3.35989	0.0770448	0.48893
ENSG00000004766	ENST00000649152	12	0.727014	3.35989	0.0770448	0.48893
ENSG00000004766	ENST00000484954	12	0.727014	3.35989	0.0770448	0.48893
ENSG00000004766	ENST00000495039	12	0.727014	3.35989	0.0770448	0.48893
ENSG00000004766	ENST00000477935	12	0.727014	3.35989	0.0770448	0.48893
ENSG00000004766	ENST00000485140	12	0.727014	3.35989	0.0770448	0.48893
ENSG00000004766	ENST00000458707	12	0.727014	3.35989	0.0770448	0.48893
ENSG00000004766	ENST00000467326	12	0.727014	3.35989	0.0770448	0.48893
ENSG00000004776	ENST00000004982	1	0.110415	0	0.740773	0.939692
ENSG00000004777	ENST00000589133	6	0.27178	0	0.707381	0.929236
ENSG00000004777	ENST00000221905	6	0.27178	0	0.707381	0.929236
ENSG00000004777	ENST00000591438	6	0.27178	0	0.707381	0.929236
ENSG00000004777	ENST00000593034	6	0.27178	0	0.707381	0.929236
ENSG00000004777	ENST00000586918	6	0.27178	0	0.707381	0.929236
ENSG00000004777	ENST00000601474	6	0.27178	0	0.707381	0.929236
ENSG00000004779	ENST00000484769	3	0.00442	0	0.960482	0.999243
ENSG00000004779	ENST00000567761	3	0.00442	0	0.960482	0.999243
ENSG00000004779	ENST00000570319	3	0.00442	0	0.960482	0.999243
ENSG00000004799	ENST00000473301	3	8.39697	0.400353	0.00584955	0.1845
ENSG00000004799	ENST00000468445	3	8.39697	0.400353	0.00584955	0.1845
ENSG00000004799	ENST00000005178	3	8.39697	0.400353	0.00584955	0.1845
ENSG00000004838	ENST00000478269	1	0.588145	0	0.445975	0.831773
ENSG00000004848	ENST00000379044	1	0.502511	0	0.480989	0.846581
ENSG00000004864	ENST00000490072	4	3.19496	0.317269	0.0909591	0.520651
ENSG00000004864	ENST00000487710	4	3.19496	0.317269	0.0909591	0.520651
ENSG00000004864	ENST00000484495	4	3.19496	0.317269	0.0909591	0.520651
ENSG00000004864	ENST00000492869	4	3.19496	0.317269	0.0909591	0.520651
ENSG00000004866	ENST00000265437	7	0.630626	0	0.537937	0.869959
ENSG00000004866	ENST00000465133	7	0.630626	0	0.537937	0.869959
ENSG00000004866	ENST00000477742	7	0.630626	0	0.537937	0.869959
ENSG00000004866	ENST00000464020	7	0.630626	0	0.537937	0.869959
ENSG00000004866	ENST00000485394	7	0.630626	0	0.537937	0.869959
ENSG00000004866	ENST00000420755	7	0.630626	0	0.537937	0.869959
ENSG00000004866	ENST00000543837	7	0.630626	0	0.537937	0.869959
ENSG00000004897	ENST00000528748	6	0.000272452	-0.689115	1	1
ENSG00000004897	ENST00000066544	6	0.000272452	-0.689115	1	1
ENSG00000004897	ENST00000575830	6	0.000272452	-0.689115	1	1
ENSG00000004897	ENST00000576484	6	0.000272452	-0.689115	1	1
ENSG00000004897	ENST00000573502	6	0.000272452	-0.689115	1	1
ENSG00000004897	ENST00000528147	6	0.000272452	-0.689115	1	1
ENSG00000004948	ENST00000394441	1	0.250836	0	0.618216	0.901199
ENSG00000004975	ENST00000573354	8	0.158593	0	0.783802	0.952709
ENSG00000004975	ENST00000576949	8	0.158593	0	0.783802	0.952709
ENSG00000004975	ENST00000576840	8	0.158593	0	0.783802	0.952709
ENSG00000004975	ENST00000572285	8	0.158593	0	0.783802	0.952709
ENSG00000004975	ENST00000576285	8	0.158593	0	0.783802	0.952709
ENSG00000004975	ENST00000005340	8	0.158593	0	0.783802	0.952709
ENSG00000004975	ENST00000574143	8	0.158593	0	0.783802	0.952709
ENSG00000004975	ENST00000574591	8	0.158593	0	0.783802	0.952709
ENSG00000005007	ENST00000600689	9	0.723775	5.13536	0.0300897	0.354957
ENSG00000005007	ENST00000598471	9	0.723775	5.13536	0.0300897	0.354957
ENSG00000005007	ENST00000594243	9	0.723775	5.13536	0.0300897	0.354957
ENSG00000005007	ENST00000601981	9	0.723775	5.13536	0.0300897	0.354957
ENSG00000005007	ENST00000600012	9	0.723775	5.13536	0.0300897	0.354957
ENSG00000005007	ENST00000598209	9	0.723775	5.13536	0.0300897	0.354957
ENSG00000005007	ENST00000594504	9	0.723775	5.13536	0.0300897	0.354957
ENSG00000005007	ENST00000600310	9	0.723775	5.13536	0.0300897	0.354957
ENSG00000005007	ENST00000596842	9	0.723775	5.13536	0.0300897	0.354957
ENSG00000005020	ENST00000345317	7	1.383	0.112952	0.318002	0.759605
ENSG00000005020	ENST00000497511	7	1.383	0.112952	0.318002	0.759605
ENSG00000005020	ENST00000490456	7	1.383	0.112952	0.318002	0.759605
ENSG00000005020	ENST00000481204	7	1.383	0.112952	0.318002	0.759605
ENSG00000005020	ENST00000487720	7	1.383	0.112952	0.318002	0.759605
ENSG00000005020	ENST00000489977	7	1.383	0.112952	0.318002	0.759605
ENSG00000005020	ENST00000468712	7	1.383	0.112952	0.318002	0.759605
ENSG00000005022	ENST00000463551	3	3.71731	0	0.0796649	0.494424
ENSG00000005022	ENST00000317881	3	3.71731	0	0.0796649	0.494424
ENSG00000005022	ENST00000460013	3	3.71731	0	0.0796649	0.494424
ENSG00000005059	ENST00000472310	2	5.72639	0	0.0235336	0.327343
ENSG00000005059	ENST00000452915	2	5.72639	0	0.0235336	0.327343
ENSG00000005075	ENST00000393794	2	0.470675	0	0.543127	0.872198
ENSG00000005075	ENST00000292614	2	0.470675	0	0.543127	0.872198
ENSG00000005100	ENST00000575153	2	0.289972	0	0.640066	0.908523
ENSG00000005100	ENST00000225296	2	0.289972	0	0.640066	0.908523
ENSG00000005108	ENST00000423059	3	0.99172	0	0.390402	0.803385
ENSG00000005108	ENST00000480061	3	0.99172	0	0.390402	0.803385
ENSG00000005108	ENST00000408005	3	0.99172	0	0.390402	0.803385
ENSG00000005156	ENST00000586407	8	0.947436	-0.482288	0.600804	0.894285
ENSG00000005156	ENST00000590181	8	0.947436	-0.482288	0.600804	0.894285
ENSG00000005156	ENST00000593099	8	0.947436	-0.482288	0.600804	0.894285
ENSG00000005156	ENST00000588713	8	0.947436	-0.482288	0.600804	0.894285
ENSG00000005156	ENST00000586435	8	0.947436	-0.482288	0.600804	0.894285
ENSG00000005156	ENST00000586058	8	0.947436	-0.482288	0.600804	0.894285
ENSG00000005156	ENST00000590630	8	0.947436	-0.482288	0.600804	0.894285
ENSG00000005156	ENST00000378526	8	0.947436	-0.482288	0.600804	0.894285
ENSG00000005175	ENST00000551293	5	0.31566	-0.246536	0.849985	0.972539
ENSG00000005175	ENST00000005386	5	0.31566	-0.246536	0.849985	0.972539
ENSG00000005175	ENST00000548211	5	0.31566	-0.246536	0.849985	0.972539
ENSG00000005175	ENST00000548296	5	0.31566	-0.246536	0.849985	0.972539
ENSG00000005175	ENST00000547706	5	0.31566	-0.246536	0.849985	0.972539
ENSG00000005187	ENST00000614721	1	0.743407	0	0.391811	0.80406
ENSG00000005189	ENST00000563617	2	6.4421	0	0.0156782	0.278056
ENSG00000005189	ENST00000563045	2	6.4421	0	0.0156782	0.278056
ENSG00000005194	ENST00000564885	3	0.104698	0	0.808348	0.960467
ENSG00000005194	ENST00000563561	3	0.104698	0	0.808348	0.960467
ENSG00000005194	ENST00000566284	3	0.104698	0	0.808348	0.960467
ENSG00000005206	ENST00000586111	8	0.353256	4.32774	0.0578232	0.442952
ENSG00000005206	ENST00000618220	8	0.353256	4.32774	0.0578232	0.442952
ENSG00000005206	ENST00000614784	8	0.353256	4.32774	0.0578232	0.442952
ENSG00000005206	ENST00000586332	8	0.353256	4.32774	0.0578232	0.442952
ENSG00000005206	ENST00000587851	8	0.353256	4.32774	0.0578232	0.442952
ENSG00000005206	ENST00000613503	8	0.353256	4.32774	0.0578232	0.442952
ENSG00000005206	ENST00000589515	8	0.353256	4.32774	0.0578232	0.442952
ENSG00000005206	ENST00000585725	8	0.353256	4.32774	0.0578232	0.442952
ENSG00000005238	ENST00000488109	3	0.551323	0	0.535957	0.86923
ENSG00000005238	ENST00000378561	3	0.551323	0	0.535957	0.86923
ENSG00000005238	ENST00000322813	3	0.551323	0	0.535957	0.86923
ENSG00000005243	ENST00000579263	3	3.56275	2.29732	0.0267986	0.342246
ENSG00000005243	ENST00000580409	3	3.56275	2.29732	0.0267986	0.342246
ENSG00000005243	ENST00000580174	3	3.56275	2.29732	0.0267986	0.342246
ENSG00000005249	ENST00000265717	3	1.59665	0.070064	0.268975	0.725442
ENSG00000005249	ENST00000488792	3	1.59665	0.070064	0.268975	0.725442
ENSG00000005249	ENST00000393613	3	1.59665	0.070064	0.268975	0.725442
ENSG00000005302	ENST00000648120	1	0.0208776	0	0.885574	0.981488
ENSG00000005339	ENST00000572569	14	14.6842	0	0.000337166	0.0484977
ENSG00000005339	ENST00000570939	14	14.6842	0	0.000337166	0.0484977
ENSG00000005339	ENST00000573672	14	14.6842	0	0.000337166	0.0484977
ENSG00000005339	ENST00000571763	14	14.6842	0	0.000337166	0.0484977
ENSG00000005339	ENST00000635899	14	14.6842	0	0.000337166	0.0484977
ENSG00000005339	ENST00000262367	14	14.6842	0	0.000337166	0.0484977
ENSG00000005339	ENST00000635753	14	14.6842	0	0.000337166	0.0484977
ENSG00000005339	ENST00000574740	14	14.6842	0	0.000337166	0.0484977
ENSG00000005339	ENST00000635919	14	14.6842	0	0.000337166	0.0484977
ENSG00000005339	ENST00000573517	14	14.6842	0	0.000337166	0.0484977
ENSG00000005339	ENST00000636895	14	14.6842	0	0.000337166	0.0484977
ENSG00000005339	ENST00000637492	14	14.6842	0	0.000337166	0.0484977
ENSG00000005339	ENST00000576720	14	14.6842	0	0.000337166	0.0484977
ENSG00000005339	ENST00000636002	14	14.6842	0	0.000337166	0.0484977
ENSG00000005379	ENST00000578511	6	4.73417	0	0.0548691	0.433731
ENSG00000005379	ENST00000585149	6	4.73417	0	0.0548691	0.433731
ENSG00000005379	ENST00000343736	6	4.73417	0	0.0548691	0.433731
ENSG00000005379	ENST00000578486	6	4.73417	0	0.0548691	0.433731
ENSG00000005379	ENST00000581692	6	4.73417	0	0.0548691	0.433731
ENSG00000005379	ENST00000583624	6	4.73417	0	0.0548691	0.433731
ENSG00000005381	ENST00000578493	2	0.0168705	0	0.91572	0.989886
ENSG00000005381	ENST00000225275	2	0.0168705	0	0.91572	0.989886
ENSG00000005436	ENST00000470197	3	1.69065	0	0.253751	0.711714
ENSG00000005436	ENST00000470503	3	1.69065	0	0.253751	0.711714
ENSG00000005436	ENST00000472230	3	1.69065	0	0.253751	0.711714
ENSG00000005448	ENST00000469932	4	0.172751	0	0.749638	0.941963
ENSG00000005448	ENST00000461531	4	0.172751	0	0.749638	0.941963
ENSG00000005448	ENST00000468778	4	0.172751	0	0.749638	0.941963
ENSG00000005448	ENST00000426787	4	0.172751	0	0.749638	0.941963
ENSG00000005469	ENST00000488850	4	0.187051	0.163169	0.629499	0.905473
ENSG00000005469	ENST00000412227	4	0.187051	0.163169	0.629499	0.905473
ENSG00000005469	ENST00000419147	4	0.187051	0.163169	0.629499	0.905473
ENSG00000005469	ENST00000442291	4	0.187051	0.163169	0.629499	0.905473
ENSG00000005471	ENST00000359206	2	0.115192	0	0.776357	0.950714
ENSG00000005471	ENST00000417608	2	0.115192	0	0.776357	0.950714
ENSG00000005483	ENST00000485619	8	0.197227	4.423	0.0567701	0.439663
ENSG00000005483	ENST00000482560	8	0.197227	4.423	0.0567701	0.439663
ENSG00000005483	ENST00000468607	8	0.197227	4.423	0.0567701	0.439663
ENSG00000005483	ENST00000479838	8	0.197227	4.423	0.0567701	0.439663
ENSG00000005483	ENST00000476671	8	0.197227	4.423	0.0567701	0.439663
ENSG00000005483	ENST00000496191	8	0.197227	4.423	0.0567701	0.439663
ENSG00000005483	ENST00000478079	8	0.197227	4.423	0.0567701	0.439663
ENSG00000005483	ENST00000480368	8	0.197227	4.423	0.0567701	0.439663
ENSG00000005486	ENST00000476218	2	0.508762	0	0.532954	0.867675
ENSG00000005486	ENST00000467406	2	0.508762	0	0.532954	0.867675
ENSG00000005513	ENST00000293894	2	0.552943	2.35325	0.124985	0.57546
ENSG00000005513	ENST00000566034	2	0.552943	2.35325	0.124985	0.57546
ENSG00000005700	ENST00000508381	3	4.85535	0	0.0428518	0.399061
ENSG00000005700	ENST00000471036	3	4.85535	0	0.0428518	0.399061
ENSG00000005700	ENST00000445419	3	4.85535	0	0.0428518	0.399061
ENSG00000005801	ENST00000529789	6	0.145388	0	0.77921	0.951253
ENSG00000005801	ENST00000529085	6	0.145388	0	0.77921	0.951253
ENSG00000005801	ENST00000527386	6	0.145388	0	0.77921	0.951253
ENSG00000005801	ENST00000429541	6	0.145388	0	0.77921	0.951253
ENSG00000005801	ENST00000649622	6	0.145388	0	0.77921	0.951253
ENSG00000005801	ENST00000525313	6	0.145388	0	0.77921	0.951253
ENSG00000005810	ENST00000474882	6	3.95257	0.0186347	0.0767353	0.488006
ENSG00000005810	ENST00000466564	6	3.95257	0.0186347	0.0767353	0.488006
ENSG00000005810	ENST00000462987	6	3.95257	0.0186347	0.0767353	0.488006
ENSG00000005810	ENST00000498073	6	3.95257	0.0186347	0.0767353	0.488006
ENSG00000005810	ENST00000482517	6	3.95257	0.0186347	0.0767353	0.488006
ENSG00000005810	ENST00000486679	6	3.95257	0.0186347	0.0767353	0.488006
ENSG00000005812	ENST00000355619	4	1.80168	0.0177182	0.24648	0.705758
ENSG00000005812	ENST00000477982	4	1.80168	0.0177182	0.24648	0.705758
ENSG00000005812	ENST00000485797	4	1.80168	0.0177182	0.24648	0.705758
ENSG00000005812	ENST00000470210	4	1.80168	0.0177182	0.24648	0.705758
ENSG00000005844	ENST00000356798	2	7.67811	0	0.00985175	0.227313
ENSG00000005844	ENST00000562020	2	7.67811	0	0.00985175	0.227313
ENSG00000005882	ENST00000510219	8	0.677483	0	0.523377	0.863549
ENSG00000005882	ENST00000508960	8	0.677483	0	0.523377	0.863549
ENSG00000005882	ENST00000512204	8	0.677483	0	0.523377	0.863549
ENSG00000005882	ENST00000505897	8	0.677483	0	0.523377	0.863549
ENSG00000005882	ENST00000511026	8	0.677483	0	0.523377	0.863549
ENSG00000005882	ENST00000506242	8	0.677483	0	0.523377	0.863549
ENSG00000005882	ENST00000503076	8	0.677483	0	0.523377	0.863549
ENSG00000005882	ENST00000503176	8	0.677483	0	0.523377	0.863549
ENSG00000005884	ENST00000505552	6	3.32545	-0.942686	0.188294	0.649327
ENSG00000005884	ENST00000505306	6	3.32545	-0.942686	0.188294	0.649327
ENSG00000005884	ENST00000506401	6	3.32545	-0.942686	0.188294	0.649327
ENSG00000005884	ENST00000504417	6	3.32545	-0.942686	0.188294	0.649327
ENSG00000005884	ENST00000506437	6	3.32545	-0.942686	0.188294	0.649327
ENSG00000005884	ENST00000570989	6	3.32545	-0.942686	0.188294	0.649327
ENSG00000005889	ENST00000459724	6	0.835518	0.000127531	0.467672	0.841496
ENSG00000005889	ENST00000379177	6	0.835518	0.000127531	0.467672	0.841496
ENSG00000005889	ENST00000379188	6	0.835518	0.000127531	0.467672	0.841496
ENSG00000005889	ENST00000497813	6	0.835518	0.000127531	0.467672	0.841496
ENSG00000005889	ENST00000474385	6	0.835518	0.000127531	0.467672	0.841496
ENSG00000005889	ENST00000480195	6	0.835518	0.000127531	0.467672	0.841496
ENSG00000005893	ENST00000434600	3	0.410675	2.13407	0.163986	0.623129
ENSG00000005893	ENST00000200639	3	0.410675	2.13407	0.163986	0.623129
ENSG00000005893	ENST00000371335	3	0.410675	2.13407	0.163986	0.623129
ENSG00000005961	ENST00000589645	4	0.00222853	0	0.97416	1
ENSG00000005961	ENST00000262407	4	0.00222853	0	0.97416	1
ENSG00000005961	ENST00000592462	4	0.00222853	0	0.97416	1
ENSG00000005961	ENST00000592226	4	0.00222853	0	0.97416	1
ENSG00000005981	ENST00000428113	3	0.0828257	2.52286	0.16183	0.62066
ENSG00000005981	ENST00000257621	3	0.0828257	2.52286	0.16183	0.62066
ENSG00000005981	ENST00000325885	3	0.0828257	2.52286	0.16183	0.62066
ENSG00000006007	ENST00000569899	3	0.0901309	0.623427	0.470263	0.842776
ENSG00000006007	ENST00000569773	3	0.0901309	0.623427	0.470263	0.842776
ENSG00000006007	ENST00000353258	3	0.0901309	0.623427	0.470263	0.842776
ENSG00000006015	ENST00000595077	1	0.563903	0	0.455461	0.836625
ENSG00000006016	ENST00000593286	3	2.13963	0	0.188792	0.649619
ENSG00000006016	ENST00000392386	3	2.13963	0	0.188792	0.649619
ENSG00000006016	ENST00000594325	3	2.13963	0	0.188792	0.649619
ENSG00000006025	ENST00000580226	5	1.2304	0.456876	0.269249	0.725448
ENSG00000006025	ENST00000585051	5	1.2304	0.456876	0.269249	0.725448
ENSG00000006025	ENST00000583167	5	1.2304	0.456876	0.269249	0.725448
ENSG00000006025	ENST00000579728	5	1.2304	0.456876	0.269249	0.725448
ENSG00000006025	ENST00000584698	5	1.2304	0.456876	0.269249	0.725448
ENSG00000006042	ENST00000583437	4	2.25535	0.00839231	0.20194	0.66567
ENSG00000006042	ENST00000578289	4	2.25535	0.00839231	0.20194	0.66567
ENSG00000006042	ENST00000579849	4	2.25535	0.00839231	0.20194	0.66567
ENSG00000006042	ENST00000439138	4	2.25535	0.00839231	0.20194	0.66567
ENSG00000006047	ENST00000571485	1	0.489358	0	0.486764	0.849398
ENSG00000006062	ENST00000592267	3	0.618502	0.163554	0.4545	0.836536
ENSG00000006062	ENST00000617331	3	0.618502	0.163554	0.4545	0.836536
ENSG00000006062	ENST00000586644	3	0.618502	0.163554	0.4545	0.836536
ENSG00000006071	ENST00000531642	13	2.13318	0	0.23002	0.692801
ENSG00000006071	ENST00000646737	13	2.13318	0	0.23002	0.692801
ENSG00000006071	ENST00000644542	13	2.13318	0	0.23002	0.692801
ENSG00000006071	ENST00000644649	13	2.13318	0	0.23002	0.692801
ENSG00000006071	ENST00000647086	13	2.13318	0	0.23002	0.692801
ENSG00000006071	ENST00000644447	13	2.13318	0	0.23002	0.692801
ENSG00000006071	ENST00000528202	13	2.13318	0	0.23002	0.692801
ENSG00000006071	ENST00000526002	13	2.13318	0	0.23002	0.692801
ENSG00000006071	ENST00000646207	13	2.13318	0	0.23002	0.692801
ENSG00000006071	ENST00000530147	13	2.13318	0	0.23002	0.692801
ENSG00000006071	ENST00000643925	13	2.13318	0	0.23002	0.692801
ENSG00000006071	ENST00000645760	13	2.13318	0	0.23002	0.692801
ENSG00000006071	ENST00000531911	13	2.13318	0	0.23002	0.692801
ENSG00000006116	ENST00000005284	1	0.582651	0	0.448097	0.83331
ENSG00000006118	ENST00000543732	5	8.25389	0	0.00826604	0.215846
ENSG00000006118	ENST00000540112	5	8.25389	0	0.00826604	0.215846
ENSG00000006118	ENST00000537110	5	8.25389	0	0.00826604	0.215846
ENSG00000006118	ENST00000534983	5	8.25389	0	0.00826604	0.215846
ENSG00000006118	ENST00000544098	5	8.25389	0	0.00826604	0.215846
ENSG00000006125	ENST00000616784	8	5.63829	-0.203363	0.0368842	0.379031
ENSG00000006125	ENST00000590432	8	5.63829	-0.203363	0.0368842	0.379031
ENSG00000006125	ENST00000588116	8	5.63829	-0.203363	0.0368842	0.379031
ENSG00000006125	ENST00000593014	8	5.63829	-0.203363	0.0368842	0.379031
ENSG00000006125	ENST00000619183	8	5.63829	-0.203363	0.0368842	0.379031
ENSG00000006125	ENST00000589774	8	5.63829	-0.203363	0.0368842	0.379031
ENSG00000006125	ENST00000587805	8	5.63829	-0.203363	0.0368842	0.379031
ENSG00000006125	ENST00000591561	8	5.63829	-0.203363	0.0368842	0.379031
ENSG00000006128	ENST00000491437	2	1.35078	0	0.321746	0.760909
ENSG00000006128	ENST00000495916	2	1.35078	0	0.321746	0.760909
ENSG00000006194	ENST00000575332	3	0.117623	4.43257	0.0489885	0.414802
ENSG00000006194	ENST00000219069	3	0.117623	4.43257	0.0489885	0.414802
ENSG00000006194	ENST00000573578	3	0.117623	4.43257	0.0489885	0.414802
ENSG00000006210	ENST00000565912	1	0.408283	0	0.525155	0.864298
ENSG00000006282	ENST00000619622	2	0.232363	0	0.676691	0.921039
ENSG00000006282	ENST00000503063	2	0.232363	0	0.676691	0.921039
ENSG00000006283	ENST00000359106	4	0.186784	1.78916	0.239033	0.699783
ENSG00000006283	ENST00000570567	4	0.186784	1.78916	0.239033	0.699783
ENSG00000006283	ENST00000506520	4	0.186784	1.78916	0.239033	0.699783
ENSG00000006283	ENST00000416767	4	0.186784	1.78916	0.239033	0.699783
ENSG00000006377	ENST00000518156	1	3.96756	0	0.0508289	0.420242
ENSG00000006432	ENST00000554024	1	6.00547	0	0.0170234	0.286038
ENSG00000006451	ENST00000466491	4	0.360843	0	0.625459	0.904024
ENSG00000006451	ENST00000436179	4	0.360843	0	0.625459	0.904024
ENSG00000006451	ENST00000434466	4	0.360843	0	0.625459	0.904024
ENSG00000006451	ENST00000005257	4	0.360843	0	0.625459	0.904024
ENSG00000006453	ENST00000005260	1	2.10574	0	0.151662	0.609979
ENSG00000006459	ENST00000472616	3	4.45938	0	0.053313	0.429165
ENSG00000006459	ENST00000478996	3	4.45938	0	0.053313	0.429165
ENSG00000006459	ENST00000397560	3	4.45938	0	0.053313	0.429165
ENSG00000006468	ENST00000405358	4	0.0532833	1.56761	0.287725	0.735551
ENSG00000006468	ENST00000472931	4	0.0532833	1.56761	0.287725	0.735551
ENSG00000006468	ENST00000483075	4	0.0532833	1.56761	0.287725	0.735551
ENSG00000006468	ENST00000460438	4	0.0532833	1.56761	0.287725	0.735551
ENSG00000006530	ENST00000650547	14	0.800155	4.28399	0.0450999	0.404329
ENSG00000006530	ENST00000492693	14	0.800155	4.28399	0.0450999	0.404329
ENSG00000006530	ENST00000647898	14	0.800155	4.28399	0.0450999	0.404329
ENSG00000006530	ENST00000496273	14	0.800155	4.28399	0.0450999	0.404329
ENSG00000006530	ENST00000650365	14	0.800155	4.28399	0.0450999	0.404329
ENSG00000006530	ENST00000495028	14	0.800155	4.28399	0.0450999	0.404329
ENSG00000006530	ENST00000473247	14	0.800155	4.28399	0.0450999	0.404329
ENSG00000006530	ENST00000650006	14	0.800155	4.28399	0.0450999	0.404329
ENSG00000006530	ENST00000465241	14	0.800155	4.28399	0.0450999	0.404329
ENSG00000006530	ENST00000647568	14	0.800155	4.28399	0.0450999	0.404329
ENSG00000006530	ENST00000648489	14	0.800155	4.28399	0.0450999	0.404329
ENSG00000006530	ENST00000494053	14	0.800155	4.28399	0.0450999	0.404329
ENSG00000006530	ENST00000355413	14	0.800155	4.28399	0.0450999	0.404329
ENSG00000006530	ENST00000496784	14	0.800155	4.28399	0.0450999	0.404329
ENSG00000006534	ENST00000615368	3	5.24194	0	0.0370789	0.37913
ENSG00000006534	ENST00000617449	3	5.24194	0	0.0370789	0.37913
ENSG00000006534	ENST00000614849	3	5.24194	0	0.0370789	0.37913
ENSG00000006555	ENST00000371276	2	1.78891	0	0.217629	0.681034
ENSG00000006555	ENST00000488771	2	1.78891	0	0.217629	0.681034
ENSG00000006576	ENST00000450574	3	0.813474	0.101957	0.411357	0.814973
ENSG00000006576	ENST00000479515	3	0.813474	0.101957	0.411357	0.814973
ENSG00000006576	ENST00000454592	3	0.813474	0.101957	0.411357	0.814973
ENSG00000006607	ENST00000445489	13	12.6646	8.37737	1.35745e-05	0.00855478
ENSG00000006607	ENST00000496470	13	12.6646	8.37737	1.35745e-05	0.00855478
ENSG00000006607	ENST00000476799	13	12.6646	8.37737	1.35745e-05	0.00855478
ENSG00000006607	ENST00000264042	13	12.6646	8.37737	1.35745e-05	0.00855478
ENSG00000006607	ENST00000471447	13	12.6646	8.37737	1.35745e-05	0.00855478
ENSG00000006607	ENST00000479427	13	12.6646	8.37737	1.35745e-05	0.00855478
ENSG00000006607	ENST00000467260	13	12.6646	8.37737	1.35745e-05	0.00855478
ENSG00000006607	ENST00000473510	13	12.6646	8.37737	1.35745e-05	0.00855478
ENSG00000006607	ENST00000470617	13	12.6646	8.37737	1.35745e-05	0.00855478
ENSG00000006607	ENST00000373287	13	12.6646	8.37737	1.35745e-05	0.00855478
ENSG00000006607	ENST00000491425	13	12.6646	8.37737	1.35745e-05	0.00855478
ENSG00000006607	ENST00000486736	13	12.6646	8.37737	1.35745e-05	0.00855478
ENSG00000006607	ENST00000413432	13	12.6646	8.37737	1.35745e-05	0.00855478
ENSG00000006611	ENST00000530700	6	2.1452	0.11871	0.208293	0.672338
ENSG00000006611	ENST00000527551	6	2.1452	0.11871	0.208293	0.672338
ENSG00000006611	ENST00000529563	6	2.1452	0.11871	0.208293	0.672338
ENSG00000006611	ENST00000005226	6	2.1452	0.11871	0.208293	0.672338
ENSG00000006611	ENST00000534556	6	2.1452	0.11871	0.208293	0.672338
ENSG00000006611	ENST00000624811	6	2.1452	0.11871	0.208293	0.672338
ENSG00000006634	ENST00000265728	2	0.000384572	0	0.98706	1
ENSG00000006634	ENST00000495067	2	0.000384572	0	0.98706	1
ENSG00000006652	ENST00000476927	4	0.551883	0	0.539097	0.870339
ENSG00000006652	ENST00000429071	4	0.551883	0	0.539097	0.870339
ENSG00000006652	ENST00000421296	4	0.551883	0	0.539097	0.870339
ENSG00000006652	ENST00000489994	4	0.551883	0	0.539097	0.870339
ENSG00000006695	ENST00000429152	2	1.92456e-05	0	0.997102	1
ENSG00000006695	ENST00000261643	2	1.92456e-05	0	0.997102	1
ENSG00000006704	ENST00000265755	4	1.26463	0	0.352361	0.781683
ENSG00000006704	ENST00000476977	4	1.26463	0	0.352361	0.781683
ENSG00000006704	ENST00000486086	4	1.26463	0	0.352361	0.781683
ENSG00000006704	ENST00000455841	4	1.26463	0	0.352361	0.781683
ENSG00000006712	ENST00000221265	2	0.11705	0.34419	0.544108	0.872747
ENSG00000006712	ENST00000416728	2	0.11705	0.34419	0.544108	0.872747
ENSG00000006715	ENST00000466017	10	0.0694351	0	0.85773	0.975296
ENSG00000006715	ENST00000439468	10	0.0694351	0	0.85773	0.975296
ENSG00000006715	ENST00000265745	10	0.0694351	0	0.85773	0.975296
ENSG00000006715	ENST00000485955	10	0.0694351	0	0.85773	0.975296
ENSG00000006715	ENST00000413141	10	0.0694351	0	0.85773	0.975296
ENSG00000006715	ENST00000310301	10	0.0694351	0	0.85773	0.975296
ENSG00000006715	ENST00000490924	10	0.0694351	0	0.85773	0.975296
ENSG00000006715	ENST00000482217	10	0.0694351	0	0.85773	0.975296
ENSG00000006715	ENST00000462429	10	0.0694351	0	0.85773	0.975296
ENSG00000006715	ENST00000448833	10	0.0694351	0	0.85773	0.975296
ENSG00000006740	ENST00000584974	4	3.8881	-0.219736	0.0878642	0.514086
ENSG00000006740	ENST00000578087	4	3.8881	-0.219736	0.0878642	0.514086
ENSG00000006740	ENST00000578442	4	3.8881	-0.219736	0.0878642	0.514086
ENSG00000006740	ENST00000583608	4	3.8881	-0.219736	0.0878642	0.514086
ENSG00000006744	ENST00000465825	7	4.23975	0	0.0674758	0.468044
ENSG00000006744	ENST00000480891	7	4.23975	0	0.0674758	0.468044
ENSG00000006744	ENST00000487229	7	4.23975	0	0.0674758	0.468044
ENSG00000006744	ENST00000484122	7	4.23975	0	0.0674758	0.468044
ENSG00000006744	ENST00000446899	7	4.23975	0	0.0674758	0.468044
ENSG00000006744	ENST00000338034	7	4.23975	0	0.0674758	0.468044
ENSG00000006744	ENST00000578991	7	4.23975	0	0.0674758	0.468044
ENSG00000006747	ENST00000297029	2	1.19004	0	0.346155	0.778074
ENSG00000006747	ENST00000476649	2	1.19004	0	0.346155	0.778074
ENSG00000006756	ENST00000381154	5	3.62086	0	0.0950936	0.52686
ENSG00000006756	ENST00000495294	5	3.62086	0	0.0950936	0.52686
ENSG00000006756	ENST00000494870	5	3.62086	0	0.0950936	0.52686
ENSG00000006756	ENST00000217890	5	3.62086	0	0.0950936	0.52686
ENSG00000006756	ENST00000559324	5	3.62086	0	0.0950936	0.52686
ENSG00000006757	ENST00000381042	1	0.279825	0	0.598672	0.893975
ENSG00000006831	ENST00000544470	5	6.17939	-1.06729	0.0436431	0.400837
ENSG00000006831	ENST00000537190	5	6.17939	-1.06729	0.0436431	0.400837
ENSG00000006831	ENST00000543456	5	6.17939	-1.06729	0.0436431	0.400837
ENSG00000006831	ENST00000540974	5	6.17939	-1.06729	0.0436431	0.400837
ENSG00000006831	ENST00000357103	5	6.17939	-1.06729	0.0436431	0.400837
ENSG00000006837	ENST00000522501	3	0.212421	0	0.706371	0.929037
ENSG00000006837	ENST00000520693	3	0.212421	0	0.706371	0.929037
ENSG00000006837	ENST00000265334	3	0.212421	0	0.706371	0.929037
ENSG00000007001	ENST00000605860	2	1.14296	0	0.345196	0.777603
ENSG00000007001	ENST00000489438	2	1.14296	0	0.345196	0.777603
ENSG00000007047	ENST00000588621	4	1.67611	0	0.267185	0.723794
ENSG00000007047	ENST00000590909	4	1.67611	0	0.267185	0.723794
ENSG00000007047	ENST00000590897	4	1.67611	0	0.267185	0.723794
ENSG00000007047	ENST00000588533	4	1.67611	0	0.267185	0.723794
ENSG00000007062	ENST00000513448	1	0.174405	0	0.677632	0.921378
ENSG00000007080	ENST00000596123	3	7.56784	0.485298	0.00824315	0.215592
ENSG00000007080	ENST00000602080	3	7.56784	0.485298	0.00824315	0.215592
ENSG00000007080	ENST00000597436	3	7.56784	0.485298	0.00824315	0.215592
ENSG00000007129	ENST00000632983	3	0.0375512	0.0589306	0.811424	0.961636
ENSG00000007129	ENST00000618577	3	0.0375512	0.0589306	0.811424	0.961636
ENSG00000007129	ENST00000401445	3	0.0375512	0.0589306	0.811424	0.961636
ENSG00000007168	ENST00000576586	11	0.0828152	-0.0709993	0.944363	0.995678
ENSG00000007168	ENST00000397195	11	0.0828152	-0.0709993	0.944363	0.995678
ENSG00000007168	ENST00000570400	11	0.0828152	-0.0709993	0.944363	0.995678
ENSG00000007168	ENST00000610190	11	0.0828152	-0.0709993	0.944363	0.995678
ENSG00000007168	ENST00000571289	11	0.0828152	-0.0709993	0.944363	0.995678
ENSG00000007168	ENST00000575477	11	0.0828152	-0.0709993	0.944363	0.995678
ENSG00000007168	ENST00000574213	11	0.0828152	-0.0709993	0.944363	0.995678
ENSG00000007168	ENST00000574816	11	0.0828152	-0.0709993	0.944363	0.995678
ENSG00000007168	ENST00000609078	11	0.0828152	-0.0709993	0.944363	0.995678
ENSG00000007168	ENST00000397193	11	0.0828152	-0.0709993	0.944363	0.995678
ENSG00000007168	ENST00000571495	11	0.0828152	-0.0709993	0.944363	0.995678
ENSG00000007171	ENST00000646938	1	1.00875	0	0.319009	0.760086
ENSG00000007174	ENST00000579828	5	3.85385	0	0.079828	0.494559
ENSG00000007174	ENST00000581682	5	3.85385	0	0.079828	0.494559
ENSG00000007174	ENST00000583192	5	3.85385	0	0.079828	0.494559
ENSG00000007174	ENST00000579406	5	3.85385	0	0.079828	0.494559
ENSG00000007174	ENST00000584663	5	3.85385	0	0.079828	0.494559
ENSG00000007202	ENST00000580395	10	0.556152	0.537679	0.413387	0.815987
ENSG00000007202	ENST00000582417	10	0.556152	0.537679	0.413387	0.815987
ENSG00000007202	ENST00000582901	10	0.556152	0.537679	0.413387	0.815987
ENSG00000007202	ENST00000580882	10	0.556152	0.537679	0.413387	0.815987
ENSG00000007202	ENST00000577580	10	0.556152	0.537679	0.413387	0.815987
ENSG00000007202	ENST00000579253	10	0.556152	0.537679	0.413387	0.815987
ENSG00000007202	ENST00000528896	10	0.556152	0.537679	0.413387	0.815987
ENSG00000007202	ENST00000583860	10	0.556152	0.537679	0.413387	0.815987
ENSG00000007202	ENST00000581064	10	0.556152	0.537679	0.413387	0.815987
ENSG00000007202	ENST00000577417	10	0.556152	0.537679	0.413387	0.815987
ENSG00000007237	ENST00000584146	8	6.03746	0	0.0276587	0.344609
ENSG00000007237	ENST00000432992	8	6.03746	0	0.0276587	0.344609
ENSG00000007237	ENST00000578456	8	6.03746	0	0.0276587	0.344609
ENSG00000007237	ENST00000581112	8	6.03746	0	0.0276587	0.344609
ENSG00000007237	ENST00000581871	8	6.03746	0	0.0276587	0.344609
ENSG00000007237	ENST00000584389	8	6.03746	0	0.0276587	0.344609
ENSG00000007237	ENST00000578599	8	6.03746	0	0.0276587	0.344609
ENSG00000007237	ENST00000323816	8	6.03746	0	0.0276587	0.344609
ENSG00000007264	ENST00000590821	4	0.000830325	0	0.984334	1
ENSG00000007264	ENST00000588983	4	0.000830325	0	0.984334	1
ENSG00000007264	ENST00000591059	4	0.000830325	0	0.984334	1
ENSG00000007264	ENST00000587180	4	0.000830325	0	0.984334	1
ENSG00000007314	ENST00000435607	1	0.644717	0	0.425002	0.821939
ENSG00000007341	ENST00000459630	8	0.039135	-0.374187	1	1
ENSG00000007341	ENST00000498197	8	0.039135	-0.374187	1	1
ENSG00000007341	ENST00000485753	8	0.039135	-0.374187	1	1
ENSG00000007341	ENST00000463235	8	0.039135	-0.374187	1	1
ENSG00000007341	ENST00000369664	8	0.039135	-0.374187	1	1
ENSG00000007341	ENST00000369669	8	0.039135	-0.374187	1	1
ENSG00000007341	ENST00000477682	8	0.039135	-0.374187	1	1
ENSG00000007341	ENST00000477332	8	0.039135	-0.374187	1	1
ENSG00000007372	ENST00000639943	4	0.0957068	0	0.826887	0.96563
ENSG00000007372	ENST00000533333	4	0.0957068	0	0.826887	0.96563
ENSG00000007372	ENST00000640251	4	0.0957068	0	0.826887	0.96563
ENSG00000007372	ENST00000474783	4	0.0957068	0	0.826887	0.96563
ENSG00000007376	ENST00000561734	2	2.80674	0	0.118068	0.567035
ENSG00000007376	ENST00000562070	2	2.80674	0	0.118068	0.567035
ENSG00000007384	ENST00000487201	2	1.57869	0	0.253425	0.711496
ENSG00000007384	ENST00000493647	2	1.57869	0	0.253425	0.711496
ENSG00000007392	ENST00000495349	6	0.501696	0	0.584471	0.88717
ENSG00000007392	ENST00000337351	6	0.501696	0	0.584471	0.88717
ENSG00000007392	ENST00000469109	6	0.501696	0	0.584471	0.88717
ENSG00000007392	ENST00000490762	6	0.501696	0	0.584471	0.88717
ENSG00000007392	ENST00000464711	6	0.501696	0	0.584471	0.88717
ENSG00000007392	ENST00000426094	6	0.501696	0	0.584471	0.88717
ENSG00000007402	ENST00000487413	1	1.72549	0	0.193706	0.656174
ENSG00000007516	ENST00000567203	5	2.40898	3.64387	0.0269583	0.342421
ENSG00000007516	ENST00000421665	5	2.40898	3.64387	0.0269583	0.342421
ENSG00000007516	ENST00000567825	5	2.40898	3.64387	0.0269583	0.342421
ENSG00000007516	ENST00000565665	5	2.40898	3.64387	0.0269583	0.342421
ENSG00000007516	ENST00000561602	5	2.40898	3.64387	0.0269583	0.342421
ENSG00000007520	ENST00000007390	1	0.727676	0	0.396839	0.805853
ENSG00000007541	ENST00000544860	6	3.65319	-0.971527	0.161069	0.619898
ENSG00000007541	ENST00000480424	6	3.65319	-0.971527	0.161069	0.619898
ENSG00000007541	ENST00000420990	6	3.65319	-0.971527	0.161069	0.619898
ENSG00000007541	ENST00000635935	6	3.65319	-0.971527	0.161069	0.619898
ENSG00000007541	ENST00000476438	6	3.65319	-0.971527	0.161069	0.619898
ENSG00000007541	ENST00000637701	6	3.65319	-0.971527	0.161069	0.619898
ENSG00000007545	ENST00000467286	3	0.0284285	0	0.899012	0.985346
ENSG00000007545	ENST00000468839	3	0.0284285	0	0.899012	0.985346
ENSG00000007545	ENST00000397412	3	0.0284285	0	0.899012	0.985346
ENSG00000007866	ENST00000639578	1	8.8688	0	0.00410163	0.161807
ENSG00000007923	ENST00000460594	6	0.85451	0.578538	0.320188	0.760588
ENSG00000007923	ENST00000465508	6	0.85451	0.578538	0.320188	0.760588
ENSG00000007923	ENST00000469318	6	0.85451	0.578538	0.320188	0.760588
ENSG00000007923	ENST00000426784	6	0.85451	0.578538	0.320188	0.760588
ENSG00000007923	ENST00000485073	6	0.85451	0.578538	0.320188	0.760588
ENSG00000007923	ENST00000465911	6	0.85451	0.578538	0.320188	0.760588
ENSG00000007933	ENST00000367755	1	12.8369	0	0.000658472	0.0682873
ENSG00000007944	ENST00000356840	1	5.93672	0	0.0176502	0.288919
ENSG00000007968	ENST00000361729	1	8.78992	0	0.00425999	0.16328
ENSG00000008018	ENST00000462957	2	2.42494	0	0.148043	0.604043
ENSG00000008018	ENST00000262193	2	2.42494	0	0.148043	0.604043
ENSG00000008056	ENST00000639776	2	0.98931	0	0.382317	0.797817
ENSG00000008056	ENST00000638337	2	0.98931	0	0.382317	0.797817
ENSG00000008083	ENST00000341776	3	0.623144	0	0.506976	0.857325
ENSG00000008083	ENST00000474854	3	0.623144	0	0.506976	0.857325
ENSG00000008083	ENST00000397311	3	0.623144	0	0.506976	0.857325
ENSG00000008086	ENST00000624953	8	1.60984	0.0981003	0.284726	0.733836
ENSG00000008086	ENST00000623535	8	1.60984	0.0981003	0.284726	0.733836
ENSG00000008086	ENST00000636046	8	1.60984	0.0981003	0.284726	0.733836
ENSG00000008086	ENST00000623610	8	1.60984	0.0981003	0.284726	0.733836
ENSG00000008086	ENST00000637881	8	1.60984	0.0981003	0.284726	0.733836
ENSG00000008086	ENST00000379996	8	1.60984	0.0981003	0.284726	0.733836
ENSG00000008086	ENST00000635828	8	1.60984	0.0981003	0.284726	0.733836
ENSG00000008086	ENST00000623364	8	1.60984	0.0981003	0.284726	0.733836
ENSG00000008118	ENST00000494990	3	6.00556	0	0.0226735	0.322273
ENSG00000008118	ENST00000009105	3	6.00556	0	0.0226735	0.322273
ENSG00000008118	ENST00000651530	3	6.00556	0	0.0226735	0.322273
ENSG00000008128	ENST00000479362	4	0.0319608	0	0.897346	0.984901
ENSG00000008128	ENST00000401096	4	0.0319608	0	0.897346	0.984901
ENSG00000008128	ENST00000498810	4	0.0319608	0	0.897346	0.984901
ENSG00000008128	ENST00000404249	4	0.0319608	0	0.897346	0.984901
ENSG00000008130	ENST00000464373	5	0.707983	0.766355	0.310944	0.754665
ENSG00000008130	ENST00000480542	5	0.707983	0.766355	0.310944	0.754665
ENSG00000008130	ENST00000342348	5	0.707983	0.766355	0.310944	0.754665
ENSG00000008130	ENST00000378625	5	0.707983	0.766355	0.310944	0.754665
ENSG00000008130	ENST00000492845	5	0.707983	0.766355	0.310944	0.754665
ENSG00000008196	ENST00000489228	2	2.14913	0	0.200553	0.664071
ENSG00000008196	ENST00000393655	2	2.14913	0	0.200553	0.664071
ENSG00000008197	ENST00000008391	1	0.403767	0	0.52743	0.865711
ENSG00000008226	ENST00000478428	3	0.605638	0	0.531094	0.866902
ENSG00000008226	ENST00000477260	3	0.605638	0	0.531094	0.866902
ENSG00000008226	ENST00000440294	3	0.605638	0	0.531094	0.866902
ENSG00000008256	ENST00000495176	4	2.65482	0	0.151731	0.610184
ENSG00000008256	ENST00000482460	4	2.65482	0	0.151731	0.610184
ENSG00000008256	ENST00000461891	4	2.65482	0	0.151731	0.610184
ENSG00000008256	ENST00000465320	4	2.65482	0	0.151731	0.610184
ENSG00000008277	ENST00000426930	9	6.07475	-2.47964	0.0972542	0.52961
ENSG00000008277	ENST00000412441	9	6.07475	-2.47964	0.0972542	0.52961
ENSG00000008277	ENST00000398201	9	6.07475	-2.47964	0.0972542	0.52961
ENSG00000008277	ENST00000398204	9	6.07475	-2.47964	0.0972542	0.52961
ENSG00000008277	ENST00000398203	9	6.07475	-2.47964	0.0972542	0.52961
ENSG00000008277	ENST00000413139	9	6.07475	-2.47964	0.0972542	0.52961
ENSG00000008277	ENST00000476330	9	6.07475	-2.47964	0.0972542	0.52961
ENSG00000008277	ENST00000478920	9	6.07475	-2.47964	0.0972542	0.52961
ENSG00000008277	ENST00000439864	9	6.07475	-2.47964	0.0972542	0.52961
ENSG00000008282	ENST00000483448	1	1.17749	0	0.281963	0.732339
ENSG00000008283	ENST00000581163	7	0.215576	2.52041	0.155338	0.613915
ENSG00000008283	ENST00000392975	7	0.215576	2.52041	0.155338	0.613915
ENSG00000008283	ENST00000582997	7	0.215576	2.52041	0.155338	0.613915
ENSG00000008283	ENST00000577368	7	0.215576	2.52041	0.155338	0.613915
ENSG00000008283	ENST00000583478	7	0.215576	2.52041	0.155338	0.613915
ENSG00000008283	ENST00000580592	7	0.215576	2.52041	0.155338	0.613915
ENSG00000008283	ENST00000584291	7	0.215576	2.52041	0.155338	0.613915
ENSG00000008294	ENST00000510283	12	3.16458	2.00262	0.0444523	0.402548
ENSG00000008294	ENST00000513547	12	3.16458	2.00262	0.0444523	0.402548
ENSG00000008294	ENST00000511987	12	3.16458	2.00262	0.0444523	0.402548
ENSG00000008294	ENST00000511795	12	3.16458	2.00262	0.0444523	0.402548
ENSG00000008294	ENST00000513827	12	3.16458	2.00262	0.0444523	0.402548
ENSG00000008294	ENST00000511312	12	3.16458	2.00262	0.0444523	0.402548
ENSG00000008294	ENST00000506483	12	3.16458	2.00262	0.0444523	0.402548
ENSG00000008294	ENST00000576492	12	3.16458	2.00262	0.0444523	0.402548
ENSG00000008294	ENST00000514205	12	3.16458	2.00262	0.0444523	0.402548
ENSG00000008294	ENST00000505279	12	3.16458	2.00262	0.0444523	0.402548
ENSG00000008294	ENST00000514613	12	3.16458	2.00262	0.0444523	0.402548
ENSG00000008294	ENST00000506500	12	3.16458	2.00262	0.0444523	0.402548
ENSG00000008300	ENST00000498057	2	0.745488	0	0.464532	0.840571
ENSG00000008300	ENST00000164024	2	0.745488	0	0.464532	0.840571
ENSG00000008311	ENST00000460376	2	6.29633	0	0.0190192	0.299672
ENSG00000008311	ENST00000417368	2	6.29633	0	0.0190192	0.299672
ENSG00000008324	ENST00000447630	2	7.39539	0	0.00992774	0.227313
ENSG00000008324	ENST00000474941	2	7.39539	0	0.00992774	0.227313
ENSG00000008382	ENST00000594716	2	0.833026	0	0.413885	0.816288
ENSG00000008382	ENST00000601877	2	0.833026	0	0.413885	0.816288
ENSG00000008394	ENST00000624056	3	0.000160582	0	0.99291	1
ENSG00000008394	ENST00000534835	3	0.000160582	0	0.99291	1
ENSG00000008394	ENST00000359720	3	0.000160582	0	0.99291	1
ENSG00000008405	ENST00000552790	3	0.443589	0	0.583707	0.887037
ENSG00000008405	ENST00000550633	3	0.443589	0	0.583707	0.887037
ENSG00000008405	ENST00000008527	3	0.443589	0	0.583707	0.887037
ENSG00000008438	ENST00000008938	1	2.3388	0	0.131145	0.58422
ENSG00000008441	ENST00000587260	4	1.62732	0	0.289781	0.736993
ENSG00000008441	ENST00000588680	4	1.62732	0	0.289781	0.736993
ENSG00000008441	ENST00000360105	4	1.62732	0	0.289781	0.736993
ENSG00000008441	ENST00000397661	4	1.62732	0	0.289781	0.736993
ENSG00000008513	ENST00000519435	6	0.471193	0.3736	0.476736	0.844788
ENSG00000008513	ENST00000522204	6	0.471193	0.3736	0.476736	0.844788
ENSG00000008513	ENST00000399640	6	0.471193	0.3736	0.476736	0.844788
ENSG00000008513	ENST00000522285	6	0.471193	0.3736	0.476736	0.844788
ENSG00000008513	ENST00000521627	6	0.471193	0.3736	0.476736	0.844788
ENSG00000008513	ENST00000648219	6	0.471193	0.3736	0.476736	0.844788
ENSG00000008516	ENST00000336577	1	2.03671	0	0.158433	0.616739
ENSG00000008710	ENST00000472659	9	5.16998	0	0.0444441	0.402548
ENSG00000008710	ENST00000483814	9	5.16998	0	0.0444441	0.402548
ENSG00000008710	ENST00000471603	9	5.16998	0	0.0444441	0.402548
ENSG00000008710	ENST00000486339	9	5.16998	0	0.0444441	0.402548
ENSG00000008710	ENST00000568796	9	5.16998	0	0.0444441	0.402548
ENSG00000008710	ENST00000566784	9	5.16998	0	0.0444441	0.402548
ENSG00000008710	ENST00000474088	9	5.16998	0	0.0444441	0.402548
ENSG00000008710	ENST00000567355	9	5.16998	0	0.0444441	0.402548
ENSG00000008710	ENST00000483731	9	5.16998	0	0.0444441	0.402548
ENSG00000008735	ENST00000329492	2	3.99456	0	0.0700158	0.473505
ENSG00000008735	ENST00000008876	2	3.99456	0	0.0700158	0.473505
ENSG00000008838	ENST00000584077	10	0.701033	8.21266	0.00610177	0.187933
ENSG00000008838	ENST00000581054	10	0.701033	8.21266	0.00610177	0.187933
ENSG00000008838	ENST00000495586	10	0.701033	8.21266	0.00610177	0.187933
ENSG00000008838	ENST00000470126	10	0.701033	8.21266	0.00610177	0.187933
ENSG00000008838	ENST00000580720	10	0.701033	8.21266	0.00610177	0.187933
ENSG00000008838	ENST00000394126	10	0.701033	8.21266	0.00610177	0.187933
ENSG00000008838	ENST00000585306	10	0.701033	8.21266	0.00610177	0.187933
ENSG00000008838	ENST00000492176	10	0.701033	8.21266	0.00610177	0.187933
ENSG00000008838	ENST00000584782	10	0.701033	8.21266	0.00610177	0.187933
ENSG00000008838	ENST00000582023	10	0.701033	8.21266	0.00610177	0.187933
ENSG00000008853	ENST00000517528	4	0.266173	0	0.683625	0.923022
ENSG00000008853	ENST00000251822	4	0.266173	0	0.683625	0.923022
ENSG00000008853	ENST00000523918	4	0.266173	0	0.683625	0.923022
ENSG00000008853	ENST00000519210	4	0.266173	0	0.683625	0.923022
ENSG00000008869	ENST00000478810	4	0.218157	2.92296	0.116966	0.565482
ENSG00000008869	ENST00000471051	4	0.218157	2.92296	0.116966	0.565482
ENSG00000008869	ENST00000233099	4	0.218157	2.92296	0.116966	0.565482
ENSG00000008869	ENST00000467978	4	0.218157	2.92296	0.116966	0.565482
ENSG00000008952	ENST00000470355	6	1.42028	0	0.31431	0.758041
ENSG00000008952	ENST00000461933	6	1.42028	0	0.31431	0.758041
ENSG00000008952	ENST00000469890	6	1.42028	0	0.31431	0.758041
ENSG00000008952	ENST00000487736	6	1.42028	0	0.31431	0.758041
ENSG00000008952	ENST00000337002	6	1.42028	0	0.31431	0.758041
ENSG00000008952	ENST00000497277	6	1.42028	0	0.31431	0.758041
ENSG00000008988	ENST00000009589	3	3.67636	3.53383	0.0120414	0.247269
ENSG00000008988	ENST00000519807	3	3.67636	3.53383	0.0120414	0.247269
ENSG00000008988	ENST00000523936	3	3.67636	3.53383	0.0120414	0.247269
ENSG00000009307	ENST00000483407	7	4.30992	1.18137	0.0350685	0.373005
ENSG00000009307	ENST00000533818	7	4.30992	1.18137	0.0350685	0.373005
ENSG00000009307	ENST00000483030	7	4.30992	1.18137	0.0350685	0.373005
ENSG00000009307	ENST00000530784	7	4.30992	1.18137	0.0350685	0.373005
ENSG00000009307	ENST00000534389	7	4.30992	1.18137	0.0350685	0.373005
ENSG00000009307	ENST00000525970	7	4.30992	1.18137	0.0350685	0.373005
ENSG00000009307	ENST00000524652	7	4.30992	1.18137	0.0350685	0.373005
ENSG00000009335	ENST00000348165	7	0.326093	0	0.674038	0.919873
ENSG00000009335	ENST00000469336	7	0.326093	0	0.674038	0.919873
ENSG00000009335	ENST00000474153	7	0.326093	0	0.674038	0.919873
ENSG00000009335	ENST00000494532	7	0.326093	0	0.674038	0.919873
ENSG00000009335	ENST00000430750	7	0.326093	0	0.674038	0.919873
ENSG00000009335	ENST00000497368	7	0.326093	0	0.674038	0.919873
ENSG00000009335	ENST00000470408	7	0.326093	0	0.674038	0.919873
ENSG00000009413	ENST00000467500	5	0.509107	0	0.570762	0.88282
ENSG00000009413	ENST00000492520	5	0.509107	0	0.570762	0.88282
ENSG00000009413	ENST00000434009	5	0.509107	0	0.570762	0.88282
ENSG00000009413	ENST00000462119	5	0.509107	0	0.570762	0.88282
ENSG00000009413	ENST00000460981	5	0.509107	0	0.570762	0.88282
ENSG00000009709	ENST00000420770	1	0.610282	0	0.437588	0.828004
ENSG00000009724	ENST00000400897	1	0.218342	0	0.64192	0.908973
ENSG00000009780	ENST00000530324	3	0.419759	0	0.592236	0.890447
ENSG00000009780	ENST00000373954	3	0.419759	0	0.592236	0.890447
ENSG00000009780	ENST00000446647	3	0.419759	0	0.592236	0.890447
ENSG00000009790	ENST00000460314	2	6.33225	0	0.0197338	0.305199
ENSG00000009790	ENST00000476050	2	6.33225	0	0.0197338	0.305199
ENSG00000009830	ENST00000556404	11	0.521097	3.20943	0.0911746	0.52079
ENSG00000009830	ENST00000557525	11	0.521097	3.20943	0.0911746	0.52079
ENSG00000009830	ENST00000554884	11	0.521097	3.20943	0.0911746	0.52079
ENSG00000009830	ENST00000556880	11	0.521097	3.20943	0.0911746	0.52079
ENSG00000009830	ENST00000554767	11	0.521097	3.20943	0.0911746	0.52079
ENSG00000009830	ENST00000557675	11	0.521097	3.20943	0.0911746	0.52079
ENSG00000009830	ENST00000452340	11	0.521097	3.20943	0.0911746	0.52079
ENSG00000009830	ENST00000554948	11	0.521097	3.20943	0.0911746	0.52079
ENSG00000009830	ENST00000553880	11	0.521097	3.20943	0.0911746	0.52079
ENSG00000009830	ENST00000556851	11	0.521097	3.20943	0.0911746	0.52079
ENSG00000009830	ENST00000554564	11	0.521097	3.20943	0.0911746	0.52079
ENSG00000009844	ENST00000367630	2	0.183285	0	0.710025	0.930506
ENSG00000009844	ENST00000491881	2	0.183285	0	0.710025	0.930506
ENSG00000009950	ENST00000434326	5	0.196322	0	0.747166	0.941419
ENSG00000009950	ENST00000488212	5	0.196322	0	0.747166	0.941419
ENSG00000009950	ENST00000456640	5	0.196322	0	0.747166	0.941419
ENSG00000009950	ENST00000476404	5	0.196322	0	0.747166	0.941419
ENSG00000009950	ENST00000467221	5	0.196322	0	0.747166	0.941419
ENSG00000009954	ENST00000404251	3	0.19664	0	0.720163	0.933642
ENSG00000009954	ENST00000466844	3	0.19664	0	0.720163	0.933642
ENSG00000009954	ENST00000339594	3	0.19664	0	0.720163	0.933642
ENSG00000010017	ENST00000469916	2	1.59482	0	0.252987	0.710972
ENSG00000010017	ENST00000011619	2	1.59482	0	0.252987	0.710972
ENSG00000010072	ENST00000391858	5	0.343412	1.22374	0.292233	0.738935
ENSG00000010072	ENST00000295050	5	0.343412	1.22374	0.292233	0.738935
ENSG00000010072	ENST00000469904	5	0.343412	1.22374	0.292233	0.738935
ENSG00000010072	ENST00000366644	5	0.343412	1.22374	0.292233	0.738935
ENSG00000010072	ENST00000492437	5	0.343412	1.22374	0.292233	0.738935
ENSG00000010219	ENST00000540757	9	0.685971	-0.399215	0.695964	0.927094
ENSG00000010219	ENST00000541024	9	0.685971	-0.399215	0.695964	0.927094
ENSG00000010219	ENST00000540644	9	0.685971	-0.399215	0.695964	0.927094
ENSG00000010219	ENST00000536137	9	0.685971	-0.399215	0.695964	0.927094
ENSG00000010219	ENST00000536157	9	0.685971	-0.399215	0.695964	0.927094
ENSG00000010219	ENST00000544050	9	0.685971	-0.399215	0.695964	0.927094
ENSG00000010219	ENST00000539309	9	0.685971	-0.399215	0.695964	0.927094
ENSG00000010219	ENST00000542905	9	0.685971	-0.399215	0.695964	0.927094
ENSG00000010219	ENST00000539490	9	0.685971	-0.399215	0.695964	0.927094
ENSG00000010244	ENST00000582705	8	2.58803	-1.59298	0.429273	0.82436
ENSG00000010244	ENST00000394670	8	2.58803	-1.59298	0.429273	0.82436
ENSG00000010244	ENST00000577324	8	2.58803	-1.59298	0.429273	0.82436
ENSG00000010244	ENST00000342555	8	2.58803	-1.59298	0.429273	0.82436
ENSG00000010244	ENST00000579810	8	2.58803	-1.59298	0.429273	0.82436
ENSG00000010244	ENST00000579416	8	2.58803	-1.59298	0.429273	0.82436
ENSG00000010244	ENST00000578918	8	2.58803	-1.59298	0.429273	0.82436
ENSG00000010244	ENST00000584696	8	2.58803	-1.59298	0.429273	0.82436
ENSG00000010256	ENST00000463708	4	3.47322	0	0.0988294	0.533213
ENSG00000010256	ENST00000480561	4	3.47322	0	0.0988294	0.533213
ENSG00000010256	ENST00000467690	4	3.47322	0	0.0988294	0.533213
ENSG00000010256	ENST00000471189	4	3.47322	0	0.0988294	0.533213
ENSG00000010270	ENST00000440144	5	1.75665	0	0.25545	0.713138
ENSG00000010270	ENST00000396013	5	1.75665	0	0.25545	0.713138
ENSG00000010270	ENST00000453225	5	1.75665	0	0.25545	0.713138
ENSG00000010270	ENST00000471550	5	1.75665	0	0.25545	0.713138
ENSG00000010270	ENST00000429075	5	1.75665	0	0.25545	0.713138
ENSG00000010278	ENST00000645368	6	10.2103	0	0.0032381	0.14571
ENSG00000010278	ENST00000646407	6	10.2103	0	0.0032381	0.14571
ENSG00000010278	ENST00000536586	6	10.2103	0	0.0032381	0.14571
ENSG00000010278	ENST00000540891	6	10.2103	0	0.0032381	0.14571
ENSG00000010278	ENST00000645565	6	10.2103	0	0.0032381	0.14571
ENSG00000010278	ENST00000481267	6	10.2103	0	0.0032381	0.14571
ENSG00000010282	ENST00000480939	3	1.46753	0	0.307978	0.752797
ENSG00000010282	ENST00000497000	3	1.46753	0	0.307978	0.752797
ENSG00000010282	ENST00000490003	3	1.46753	0	0.307978	0.752797
ENSG00000010292	ENST00000535804	4	2.51411	1.88363	0.0560652	0.437976
ENSG00000010292	ENST00000315579	4	2.51411	1.88363	0.0560652	0.437976
ENSG00000010292	ENST00000536538	4	2.51411	1.88363	0.0560652	0.437976
ENSG00000010292	ENST00000539885	4	2.51411	1.88363	0.0560652	0.437976
ENSG00000010295	ENST00000488007	4	4.33716	0	0.0635978	0.459979
ENSG00000010295	ENST00000471408	4	4.33716	0	0.0635978	0.459979
ENSG00000010295	ENST00000436152	4	4.33716	0	0.0635978	0.459979
ENSG00000010295	ENST00000472558	4	4.33716	0	0.0635978	0.459979
ENSG00000010310	ENST00000588816	4	0.533453	0	0.568192	0.881916
ENSG00000010310	ENST00000591224	4	0.533453	0	0.568192	0.881916
ENSG00000010310	ENST00000652180	4	0.533453	0	0.568192	0.881916
ENSG00000010310	ENST00000591322	4	0.533453	0	0.568192	0.881916
ENSG00000010318	ENST00000498509	3	0.468227	0	0.568377	0.88201
ENSG00000010318	ENST00000473145	3	0.468227	0	0.568377	0.88201
ENSG00000010318	ENST00000327906	3	0.468227	0	0.568377	0.88201
ENSG00000010319	ENST00000231721	1	7.01517	0	0.010181	0.230256
ENSG00000010322	ENST00000489895	11	0.988815	4.45687	0.0380912	0.382324
ENSG00000010322	ENST00000485765	11	0.988815	4.45687	0.0380912	0.382324
ENSG00000010322	ENST00000488243	11	0.988815	4.45687	0.0380912	0.382324
ENSG00000010322	ENST00000488380	11	0.988815	4.45687	0.0380912	0.382324
ENSG00000010322	ENST00000460759	11	0.988815	4.45687	0.0380912	0.382324
ENSG00000010322	ENST00000464280	11	0.988815	4.45687	0.0380912	0.382324
ENSG00000010322	ENST00000467594	11	0.988815	4.45687	0.0380912	0.382324
ENSG00000010322	ENST00000481211	11	0.988815	4.45687	0.0380912	0.382324
ENSG00000010322	ENST00000474188	11	0.988815	4.45687	0.0380912	0.382324
ENSG00000010322	ENST00000488157	11	0.988815	4.45687	0.0380912	0.382324
ENSG00000010322	ENST00000420808	11	0.988815	4.45687	0.0380912	0.382324
ENSG00000010327	ENST00000479355	5	1.53555	0.030426	0.30862	0.753006
ENSG00000010327	ENST00000481607	5	1.53555	0.030426	0.30862	0.753006
ENSG00000010327	ENST00000484850	5	1.53555	0.030426	0.30862	0.753006
ENSG00000010327	ENST00000461325	5	1.53555	0.030426	0.30862	0.753006
ENSG00000010327	ENST00000321725	5	1.53555	0.030426	0.30862	0.753006
ENSG00000010361	ENST00000534138	3	2.08431	0.484405	0.156745	0.615271
ENSG00000010361	ENST00000527973	3	2.08431	0.484405	0.156745	0.615271
ENSG00000010361	ENST00000531017	3	2.08431	0.484405	0.156745	0.615271
ENSG00000010379	ENST00000539668	3	0.000826837	0	0.983414	1
ENSG00000010379	ENST00000542947	3	0.000826837	0	0.983414	1
ENSG00000010379	ENST00000436453	3	0.000826837	0	0.983414	1
ENSG00000010404	ENST00000490775	6	2.97629	2.04397	0.044996	0.403915
ENSG00000010404	ENST00000464251	6	2.97629	2.04397	0.044996	0.403915
ENSG00000010404	ENST00000466323	6	2.97629	2.04397	0.044996	0.403915
ENSG00000010404	ENST00000466019	6	2.97629	2.04397	0.044996	0.403915
ENSG00000010404	ENST00000428056	6	2.97629	2.04397	0.044996	0.403915
ENSG00000010404	ENST00000521702	6	2.97629	2.04397	0.044996	0.403915
ENSG00000010438	ENST00000495682	3	3.5461	0	0.0862639	0.51008
ENSG00000010438	ENST00000429677	3	3.5461	0	0.0862639	0.51008
ENSG00000010438	ENST00000468152	3	3.5461	0	0.0862639	0.51008
ENSG00000010539	ENST00000575285	2	3.20009	0	0.0963294	0.52869
ENSG00000010539	ENST00000575630	2	3.20009	0	0.0963294	0.52869
ENSG00000010610	ENST00000011653	2	1.12909	0	0.360315	0.787381
ENSG00000010610	ENST00000544344	2	1.12909	0	0.360315	0.787381
ENSG00000010626	ENST00000472633	3	0.42793	0	0.595526	0.89224
ENSG00000010626	ENST00000433346	3	0.42793	0	0.595526	0.89224
ENSG00000010626	ENST00000486401	3	0.42793	0	0.595526	0.89224
ENSG00000010671	ENST00000488970	2	4.14063	0	0.0633165	0.459411
ENSG00000010671	ENST00000478995	2	4.14063	0	0.0633165	0.459411
ENSG00000010704	ENST00000483782	2	1.12502	0	0.348791	0.779527
ENSG00000010704	ENST00000357618	2	1.12502	0	0.348791	0.779527
ENSG00000010803	ENST00000489421	5	0.349184	0	0.647066	0.910639
ENSG00000010803	ENST00000460215	5	0.349184	0	0.647066	0.910639
ENSG00000010803	ENST00000488592	5	0.349184	0	0.647066	0.910639
ENSG00000010803	ENST00000372595	5	0.349184	0	0.647066	0.910639
ENSG00000010803	ENST00000326197	5	0.349184	0	0.647066	0.910639
ENSG00000010810	ENST00000521062	17	0.0495134	0	0.887935	0.982122
ENSG00000010810	ENST00000518630	17	0.0495134	0	0.887935	0.982122
ENSG00000010810	ENST00000523570	17	0.0495134	0	0.887935	0.982122
ENSG00000010810	ENST00000476769	17	0.0495134	0	0.887935	0.982122
ENSG00000010810	ENST00000471959	17	0.0495134	0	0.887935	0.982122
ENSG00000010810	ENST00000462598	17	0.0495134	0	0.887935	0.982122
ENSG00000010810	ENST00000496864	17	0.0495134	0	0.887935	0.982122
ENSG00000010810	ENST00000521361	17	0.0495134	0	0.887935	0.982122
ENSG00000010810	ENST00000462856	17	0.0495134	0	0.887935	0.982122
ENSG00000010810	ENST00000491885	17	0.0495134	0	0.887935	0.982122
ENSG00000010810	ENST00000524310	17	0.0495134	0	0.887935	0.982122
ENSG00000010810	ENST00000467899	17	0.0495134	0	0.887935	0.982122
ENSG00000010810	ENST00000495927	17	0.0495134	0	0.887935	0.982122
ENSG00000010810	ENST00000487824	17	0.0495134	0	0.887935	0.982122
ENSG00000010810	ENST00000495935	17	0.0495134	0	0.887935	0.982122
ENSG00000010810	ENST00000523322	17	0.0495134	0	0.887935	0.982122
ENSG00000010810	ENST00000523574	17	0.0495134	0	0.887935	0.982122
ENSG00000010818	ENST00000367604	5	0.00904925	0	0.94921	0.996973
ENSG00000010818	ENST00000421237	5	0.00904925	0	0.94921	0.996973
ENSG00000010818	ENST00000474532	5	0.00904925	0	0.94921	0.996973
ENSG00000010818	ENST00000012134	5	0.00904925	0	0.94921	0.996973
ENSG00000010818	ENST00000367603	5	0.00904925	0	0.94921	0.996973
ENSG00000011007	ENST00000418390	2	3.76382	0	0.0702793	0.473639
ENSG00000011007	ENST00000487554	2	3.76382	0	0.0702793	0.473639
ENSG00000011009	ENST00000374514	1	1.32414	0	0.254158	0.711815
ENSG00000011021	ENST00000400892	6	1.85506	0.00298208	0.25028	0.709008
ENSG00000011021	ENST00000494028	6	1.85506	0.00298208	0.25028	0.709008
ENSG00000011021	ENST00000376497	6	1.85506	0.00298208	0.25028	0.709008
ENSG00000011021	ENST00000446542	6	1.85506	0.00298208	0.25028	0.709008
ENSG00000011021	ENST00000312413	6	1.85506	0.00298208	0.25028	0.709008
ENSG00000011021	ENST00000376496	6	1.85506	0.00298208	0.25028	0.709008
ENSG00000011028	ENST00000583597	2	1.90293	0	0.21157	0.67524
ENSG00000011028	ENST00000303375	2	1.90293	0	0.21157	0.67524
ENSG00000011083	ENST00000513403	3	1.50448	0.717607	0.196713	0.65923
ENSG00000011083	ENST00000524041	3	1.50448	0.717607	0.196713	0.65923
ENSG00000011083	ENST00000230671	3	1.50448	0.717607	0.196713	0.65923
ENSG00000011105	ENST00000407263	6	0.350608	0	0.652498	0.911309
ENSG00000011105	ENST00000431374	6	0.350608	0	0.652498	0.911309
ENSG00000011105	ENST00000539631	6	0.350608	0	0.652498	0.911309
ENSG00000011105	ENST00000444315	6	0.350608	0	0.652498	0.911309
ENSG00000011105	ENST00000640568	6	0.350608	0	0.652498	0.911309
ENSG00000011105	ENST00000492305	6	0.350608	0	0.652498	0.911309
ENSG00000011114	ENST00000298896	4	1.982	0.957459	0.128145	0.579792
ENSG00000011114	ENST00000555525	4	1.982	0.957459	0.128145	0.579792
ENSG00000011114	ENST00000554644	4	1.982	0.957459	0.128145	0.579792
ENSG00000011114	ENST00000554968	4	1.982	0.957459	0.128145	0.579792
ENSG00000011132	ENST00000586991	3	5.96473e-08	0	0.999862	1
ENSG00000011132	ENST00000316757	3	5.96473e-08	0	0.999862	1
ENSG00000011132	ENST00000590064	3	5.96473e-08	0	0.999862	1
ENSG00000011143	ENST00000581180	4	3.13503	0	0.116955	0.565482
ENSG00000011143	ENST00000580127	4	3.13503	0	0.116955	0.565482
ENSG00000011143	ENST00000579358	4	3.13503	0	0.116955	0.565482
ENSG00000011143	ENST00000583577	4	3.13503	0	0.116955	0.565482
ENSG00000011198	ENST00000486764	5	1.42254	0	0.309972	0.754184
ENSG00000011198	ENST00000643520	5	1.42254	0	0.309972	0.754184
ENSG00000011198	ENST00000646378	5	1.42254	0	0.309972	0.754184
ENSG00000011198	ENST00000013894	5	1.42254	0	0.309972	0.754184
ENSG00000011198	ENST00000644371	5	1.42254	0	0.309972	0.754184
ENSG00000011201	ENST00000481896	3	0.0080226	0	0.947168	0.996375
ENSG00000011201	ENST00000488294	3	0.0080226	0	0.947168	0.996375
ENSG00000011201	ENST00000262648	3	0.0080226	0	0.947168	0.996375
ENSG00000011243	ENST00000595087	9	0.951095	0	0.444147	0.831144
ENSG00000011243	ENST00000595136	9	0.951095	0	0.444147	0.831144
ENSG00000011243	ENST00000596750	9	0.951095	0	0.444147	0.831144
ENSG00000011243	ENST00000601147	9	0.951095	0	0.444147	0.831144
ENSG00000011243	ENST00000596213	9	0.951095	0	0.444147	0.831144
ENSG00000011243	ENST00000597994	9	0.951095	0	0.444147	0.831144
ENSG00000011243	ENST00000600065	9	0.951095	0	0.444147	0.831144
ENSG00000011243	ENST00000598292	9	0.951095	0	0.444147	0.831144
ENSG00000011243	ENST00000594893	9	0.951095	0	0.444147	0.831144
ENSG00000011258	ENST00000591270	4	2.59209	0.549139	0.112495	0.556654
ENSG00000011258	ENST00000586178	4	2.59209	0.549139	0.112495	0.556654
ENSG00000011258	ENST00000405860	4	2.59209	0.549139	0.112495	0.556654
ENSG00000011258	ENST00000593259	4	2.59209	0.549139	0.112495	0.556654
ENSG00000011260	ENST00000583725	4	0.335477	0	0.644385	0.909691
ENSG00000011260	ENST00000582150	4	0.335477	0	0.644385	0.909691
ENSG00000011260	ENST00000579261	4	0.335477	0	0.644385	0.909691
ENSG00000011260	ENST00000225298	4	0.335477	0	0.644385	0.909691
ENSG00000011275	ENST00000484458	9	0.0628684	0	0.861097	0.976134
ENSG00000011275	ENST00000469375	9	0.0628684	0	0.861097	0.976134
ENSG00000011275	ENST00000389902	9	0.0628684	0	0.861097	0.976134
ENSG00000011275	ENST00000411812	9	0.0628684	0	0.861097	0.976134
ENSG00000011275	ENST00000479541	9	0.0628684	0	0.861097	0.976134
ENSG00000011275	ENST00000425013	9	0.0628684	0	0.861097	0.976134
ENSG00000011275	ENST00000476345	9	0.0628684	0	0.861097	0.976134
ENSG00000011275	ENST00000416985	9	0.0628684	0	0.861097	0.976134
ENSG00000011275	ENST00000389900	9	0.0628684	0	0.861097	0.976134
ENSG00000011295	ENST00000481107	5	0.0390569	-0.325964	1	1
ENSG00000011295	ENST00000583704	5	0.0390569	-0.325964	1	1
ENSG00000011295	ENST00000470649	5	0.0390569	-0.325964	1	1
ENSG00000011295	ENST00000261647	5	0.0390569	-0.325964	1	1
ENSG00000011295	ENST00000465567	5	0.0390569	-0.325964	1	1
ENSG00000011304	ENST00000585856	3	0.342181	0	0.632709	0.906433
ENSG00000011304	ENST00000587094	3	0.342181	0	0.632709	0.906433
ENSG00000011304	ENST00000586944	3	0.342181	0	0.632709	0.906433
ENSG00000011332	ENST00000586624	6	1.27971	0	0.35956	0.786911
ENSG00000011332	ENST00000473716	6	1.27971	0	0.35956	0.786911
ENSG00000011332	ENST00000488378	6	1.27971	0	0.35956	0.786911
ENSG00000011332	ENST00000414789	6	1.27971	0	0.35956	0.786911
ENSG00000011332	ENST00000438060	6	1.27971	0	0.35956	0.786911
ENSG00000011332	ENST00000494031	6	1.27971	0	0.35956	0.786911
ENSG00000011347	ENST00000263846	2	1.60107	0	0.270662	0.725671
ENSG00000011347	ENST00000540831	2	1.60107	0	0.270662	0.725671
ENSG00000011376	ENST00000652135	7	1.90473	2.74438	0.0536518	0.429779
ENSG00000011376	ENST00000474585	7	1.90473	2.74438	0.0536518	0.429779
ENSG00000011376	ENST00000642274	7	1.90473	2.74438	0.0536518	0.429779
ENSG00000011376	ENST00000651549	7	1.90473	2.74438	0.0536518	0.429779
ENSG00000011376	ENST00000467936	7	1.90473	2.74438	0.0536518	0.429779
ENSG00000011376	ENST00000650792	7	1.90473	2.74438	0.0536518	0.429779
ENSG00000011376	ENST00000431023	7	1.90473	2.74438	0.0536518	0.429779
ENSG00000011405	ENST00000503729	3	1.61143	0	0.265276	0.722846
ENSG00000011405	ENST00000533645	3	1.61143	0	0.265276	0.722846
ENSG00000011405	ENST00000265970	3	1.61143	0	0.265276	0.722846
ENSG00000011422	ENST00000601876	6	5.43255	0	0.0372057	0.379362
ENSG00000011422	ENST00000221264	6	5.43255	0	0.0372057	0.379362
ENSG00000011422	ENST00000595038	6	5.43255	0	0.0372057	0.379362
ENSG00000011422	ENST00000598875	6	5.43255	0	0.0372057	0.379362
ENSG00000011422	ENST00000594364	6	5.43255	0	0.0372057	0.379362
ENSG00000011422	ENST00000339082	6	5.43255	0	0.0372057	0.379362
ENSG00000011426	ENST00000265748	4	2.2395	1.63151	0.0818219	0.498677
ENSG00000011426	ENST00000460598	4	2.2395	1.63151	0.0818219	0.498677
ENSG00000011426	ENST00000491782	4	2.2395	1.63151	0.0818219	0.498677
ENSG00000011426	ENST00000457743	4	2.2395	1.63151	0.0818219	0.498677
ENSG00000011451	ENST00000263381	6	1.98388	1.36916	0.10591	0.545378
ENSG00000011451	ENST00000600632	6	1.98388	1.36916	0.10591	0.545378
ENSG00000011451	ENST00000643092	6	1.98388	1.36916	0.10591	0.545378
ENSG00000011451	ENST00000599910	6	1.98388	1.36916	0.10591	0.545378
ENSG00000011451	ENST00000599686	6	1.98388	1.36916	0.10591	0.545378
ENSG00000011451	ENST00000595214	6	1.98388	1.36916	0.10591	0.545378
ENSG00000011454	ENST00000485090	9	0.00137045	0.153044	0.782403	0.952247
ENSG00000011454	ENST00000480054	9	0.00137045	0.153044	0.782403	0.952247
ENSG00000011454	ENST00000456584	9	0.00137045	0.153044	0.782403	0.952247
ENSG00000011454	ENST00000493854	9	0.00137045	0.153044	0.782403	0.952247
ENSG00000011454	ENST00000317419	9	0.00137045	0.153044	0.782403	0.952247
ENSG00000011454	ENST00000616002	9	0.00137045	0.153044	0.782403	0.952247
ENSG00000011454	ENST00000474707	9	0.00137045	0.153044	0.782403	0.952247
ENSG00000011454	ENST00000402311	9	0.00137045	0.153044	0.782403	0.952247
ENSG00000011454	ENST00000373647	9	0.00137045	0.153044	0.782403	0.952247
ENSG00000011465	ENST00000551354	7	6.59053	-0.821979	0.0320144	0.361187
ENSG00000011465	ENST00000548768	7	6.59053	-0.821979	0.0320144	0.361187
ENSG00000011465	ENST00000550758	7	6.59053	-0.821979	0.0320144	0.361187
ENSG00000011465	ENST00000546745	7	6.59053	-0.821979	0.0320144	0.361187
ENSG00000011465	ENST00000549513	7	6.59053	-0.821979	0.0320144	0.361187
ENSG00000011465	ENST00000052754	7	6.59053	-0.821979	0.0320144	0.361187
ENSG00000011465	ENST00000546370	7	6.59053	-0.821979	0.0320144	0.361187
ENSG00000011478	ENST00000012049	1	0.391682	0	0.533656	0.868132
ENSG00000011485	ENST00000478046	8	0.148878	5.52587	0.0329132	0.365643
ENSG00000011485	ENST00000532058	8	0.148878	5.52587	0.0329132	0.365643
ENSG00000011485	ENST00000487483	8	0.148878	5.52587	0.0329132	0.365643
ENSG00000011485	ENST00000492109	8	0.148878	5.52587	0.0329132	0.365643
ENSG00000011485	ENST00000525507	8	0.148878	5.52587	0.0329132	0.365643
ENSG00000011485	ENST00000595055	8	0.148878	5.52587	0.0329132	0.365643
ENSG00000011485	ENST00000467902	8	0.148878	5.52587	0.0329132	0.365643
ENSG00000011485	ENST00000012443	8	0.148878	5.52587	0.0329132	0.365643
ENSG00000011523	ENST00000537589	2	6.44319	0	0.0171067	0.286038
ENSG00000011523	ENST00000497039	2	6.44319	0	0.0171067	0.286038
ENSG00000011566	ENST00000474502	7	0.0263543	0	0.911753	0.989013
ENSG00000011566	ENST00000479708	7	0.0263543	0	0.911753	0.989013
ENSG00000011566	ENST00000475457	7	0.0263543	0	0.911753	0.989013
ENSG00000011566	ENST00000497566	7	0.0263543	0	0.911753	0.989013
ENSG00000011566	ENST00000437545	7	0.0263543	0	0.911753	0.989013
ENSG00000011566	ENST00000495648	7	0.0263543	0	0.911753	0.989013
ENSG00000011566	ENST00000414968	7	0.0263543	0	0.911753	0.989013
ENSG00000011638	ENST00000573487	2	0.231354	0	0.680487	0.921725
ENSG00000011638	ENST00000573688	2	0.231354	0	0.680487	0.921725
ENSG00000011677	ENST00000497894	4	1.28647	0	0.338188	0.772752
ENSG00000011677	ENST00000535043	4	1.28647	0	0.338188	0.772752
ENSG00000011677	ENST00000417858	4	1.28647	0	0.338188	0.772752
ENSG00000011677	ENST00000370314	4	1.28647	0	0.338188	0.772752
ENSG00000012048	ENST00000472490	3	1.97487	0	0.214185	0.677772
ENSG00000012048	ENST00000591849	3	1.97487	0	0.214185	0.677772
ENSG00000012048	ENST00000618469	3	1.97487	0	0.214185	0.677772
ENSG00000012061	ENST00000592905	7	1.80359	0	0.262448	0.720505
ENSG00000012061	ENST00000589214	7	1.80359	0	0.262448	0.720505
ENSG00000012061	ENST00000588300	7	1.80359	0	0.262448	0.720505
ENSG00000012061	ENST00000592083	7	1.80359	0	0.262448	0.720505
ENSG00000012061	ENST00000588738	7	1.80359	0	0.262448	0.720505
ENSG00000012061	ENST00000423698	7	1.80359	0	0.262448	0.720505
ENSG00000012061	ENST00000587888	7	1.80359	0	0.262448	0.720505
ENSG00000012124	ENST00000596492	8	2.65626	0	0.171538	0.631457
ENSG00000012124	ENST00000594954	8	2.65626	0	0.171538	0.631457
ENSG00000012124	ENST00000595419	8	2.65626	0	0.171538	0.631457
ENSG00000012124	ENST00000598537	8	2.65626	0	0.171538	0.631457
ENSG00000012124	ENST00000600655	8	2.65626	0	0.171538	0.631457
ENSG00000012124	ENST00000613136	8	2.65626	0	0.171538	0.631457
ENSG00000012124	ENST00000593867	8	2.65626	0	0.171538	0.631457
ENSG00000012124	ENST00000593704	8	2.65626	0	0.171538	0.631457
ENSG00000012171	ENST00000612509	5	2.86097	0.329219	0.122592	0.573268
ENSG00000012171	ENST00000456210	5	2.86097	0.329219	0.122592	0.573268
ENSG00000012171	ENST00000441915	5	2.86097	0.329219	0.122592	0.573268
ENSG00000012171	ENST00000419007	5	2.86097	0.329219	0.122592	0.573268
ENSG00000012171	ENST00000619119	5	2.86097	0.329219	0.122592	0.573268
ENSG00000012174	ENST00000379484	2	0.881016	0	0.410232	0.814451
ENSG00000012174	ENST00000365779	2	0.881016	0	0.410232	0.814451
ENSG00000012211	ENST00000376310	1	2.30132	0	0.134219	0.588664
ENSG00000012232	ENST00000520679	7	0.804455	0.389634	0.378771	0.796211
ENSG00000012232	ENST00000520940	7	0.804455	0.389634	0.378771	0.796211
ENSG00000012232	ENST00000220562	7	0.804455	0.389634	0.378771	0.796211
ENSG00000012232	ENST00000523271	7	0.804455	0.389634	0.378771	0.796211
ENSG00000012232	ENST00000522725	7	0.804455	0.389634	0.378771	0.796211
ENSG00000012232	ENST00000517738	7	0.804455	0.389634	0.378771	0.796211
ENSG00000012232	ENST00000454906	7	0.804455	0.389634	0.378771	0.796211
ENSG00000012660	ENST00000370913	3	0.22811	0	0.718332	0.932952
ENSG00000012660	ENST00000486973	3	0.22811	0	0.718332	0.932952
ENSG00000012660	ENST00000370918	3	0.22811	0	0.718332	0.932952
ENSG00000012779	ENST00000483623	3	2.89733	0	0.138903	0.593612
ENSG00000012779	ENST00000498461	3	2.89733	0	0.138903	0.593612
ENSG00000012779	ENST00000481117	3	2.89733	0	0.138903	0.593612
ENSG00000012817	ENST00000492117	5	0.905825	0	0.449472	0.834354
ENSG00000012817	ENST00000541639	5	0.905825	0	0.449472	0.834354
ENSG00000012817	ENST00000485154	5	0.905825	0	0.449472	0.834354
ENSG00000012817	ENST00000469599	5	0.905825	0	0.449472	0.834354
ENSG00000012817	ENST00000478891	5	0.905825	0	0.449472	0.834354
ENSG00000012822	ENST00000549613	10	0.0917768	0.193348	0.707631	0.929413
ENSG00000012822	ENST00000547988	10	0.0917768	0.193348	0.707631	0.929413
ENSG00000012822	ENST00000547949	10	0.0917768	0.193348	0.707631	0.929413
ENSG00000012822	ENST00000552282	10	0.0917768	0.193348	0.707631	0.929413
ENSG00000012822	ENST00000553154	10	0.0917768	0.193348	0.707631	0.929413
ENSG00000012822	ENST00000547885	10	0.0917768	0.193348	0.707631	0.929413
ENSG00000012822	ENST00000549935	10	0.0917768	0.193348	0.707631	0.929413
ENSG00000012822	ENST00000548431	10	0.0917768	0.193348	0.707631	0.929413
ENSG00000012822	ENST00000548263	10	0.0917768	0.193348	0.707631	0.929413
ENSG00000012822	ENST00000546774	10	0.0917768	0.193348	0.707631	0.929413
ENSG00000012963	ENST00000013070	1	0.219639	0	0.640917	0.908948
ENSG00000012983	ENST00000554990	6	4.72601	0	0.0530353	0.428126
ENSG00000012983	ENST00000554066	6	4.72601	0	0.0530353	0.428126
ENSG00000012983	ENST00000555216	6	4.72601	0	0.0530353	0.428126
ENSG00000012983	ENST00000557210	6	4.72601	0	0.0530353	0.428126
ENSG00000012983	ENST00000013125	6	4.72601	0	0.0530353	0.428126
ENSG00000012983	ENST00000557124	6	4.72601	0	0.0530353	0.428126
ENSG00000013016	ENST00000322054	1	0.539331	0	0.46541	0.840724
ENSG00000013275	ENST00000601697	3	1.70768	0.238616	0.220227	0.683378
ENSG00000013275	ENST00000601194	3	1.70768	0.238616	0.220227	0.683378
ENSG00000013275	ENST00000593455	3	1.70768	0.238616	0.220227	0.683378
ENSG00000013288	ENST00000504960	3	1.3058	0	0.31989	0.760363
ENSG00000013288	ENST00000505907	3	1.3058	0	0.31989	0.760363
ENSG00000013288	ENST00000285599	3	1.3058	0	0.31989	0.760363
ENSG00000013293	ENST00000231706	2	0.455214	0	0.556364	0.877273
ENSG00000013293	ENST00000466168	2	0.455214	0	0.556364	0.877273
ENSG00000013297	ENST00000486429	1	3.48827	0	0.066789	0.466163
ENSG00000013306	ENST00000591006	4	1.5216	0	0.2961	0.742368
ENSG00000013306	ENST00000588315	4	1.5216	0	0.2961	0.742368
ENSG00000013306	ENST00000592857	4	1.5216	0	0.2961	0.742368
ENSG00000013306	ENST00000591151	4	1.5216	0	0.2961	0.742368
ENSG00000013364	ENST00000566252	5	8.73093	0	0.00661692	0.197514
ENSG00000013364	ENST00000570234	5	8.73093	0	0.00661692	0.197514
ENSG00000013364	ENST00000569612	5	8.73093	0	0.00661692	0.197514
ENSG00000013364	ENST00000566066	5	8.73093	0	0.00661692	0.197514
ENSG00000013364	ENST00000566554	5	8.73093	0	0.00661692	0.197514
ENSG00000013374	ENST00000480714	6	0.240649	0	0.716881	0.932598
ENSG00000013374	ENST00000477666	6	0.240649	0	0.716881	0.932598
ENSG00000013374	ENST00000470229	6	0.240649	0	0.716881	0.932598
ENSG00000013374	ENST00000497987	6	0.240649	0	0.716881	0.932598
ENSG00000013374	ENST00000493588	6	0.240649	0	0.716881	0.932598
ENSG00000013374	ENST00000470316	6	0.240649	0	0.716881	0.932598
ENSG00000013375	ENST00000652468	5	0.594899	0	0.536844	0.869779
ENSG00000013375	ENST00000605602	5	0.594899	0	0.536844	0.869779
ENSG00000013375	ENST00000513973	5	0.594899	0	0.536844	0.869779
ENSG00000013375	ENST00000507404	5	0.594899	0	0.536844	0.869779
ENSG00000013375	ENST00000515333	5	0.594899	0	0.536844	0.869779
ENSG00000013392	ENST00000369724	1	0.261138	0	0.611109	0.898492
ENSG00000013441	ENST00000496205	8	0.146737	1.29797	0.326959	0.763972
ENSG00000013441	ENST00000482590	8	0.146737	1.29797	0.326959	0.763972
ENSG00000013441	ENST00000409769	8	0.146737	1.29797	0.326959	0.763972
ENSG00000013441	ENST00000434813	8	0.146737	1.29797	0.326959	0.763972
ENSG00000013441	ENST00000461981	8	0.146737	1.29797	0.326959	0.763972
ENSG00000013441	ENST00000461326	8	0.146737	1.29797	0.326959	0.763972
ENSG00000013441	ENST00000473565	8	0.146737	1.29797	0.326959	0.763972
ENSG00000013441	ENST00000621181	8	0.146737	1.29797	0.326959	0.763972
ENSG00000013503	ENST00000228347	4	2.1126	0	0.210657	0.67411
ENSG00000013503	ENST00000539066	4	2.1126	0	0.210657	0.67411
ENSG00000013503	ENST00000549195	4	2.1126	0	0.210657	0.67411
ENSG00000013503	ENST00000549569	4	2.1126	0	0.210657	0.67411
ENSG00000013523	ENST00000556298	4	0.94526	0.300083	0.338898	0.773055
ENSG00000013523	ENST00000251089	4	0.94526	0.300083	0.338898	0.773055
ENSG00000013523	ENST00000554941	4	0.94526	0.300083	0.338898	0.773055
ENSG00000013523	ENST00000557179	4	0.94526	0.300083	0.338898	0.773055
ENSG00000013561	ENST00000506004	3	0.156283	0.664387	0.434557	0.827011
ENSG00000013561	ENST00000347642	3	0.156283	0.664387	0.434557	0.827011
ENSG00000013561	ENST00000507163	3	0.156283	0.664387	0.434557	0.827011
ENSG00000013563	ENST00000014935	2	2.1721	0	0.178153	0.638406
ENSG00000013563	ENST00000369808	2	2.1721	0	0.178153	0.638406
ENSG00000013573	ENST00000542777	10	0.34265	1.89172	0.215216	0.67881
ENSG00000013573	ENST00000435753	10	0.34265	1.89172	0.215216	0.67881
ENSG00000013573	ENST00000543026	10	0.34265	1.89172	0.215216	0.67881
ENSG00000013573	ENST00000542244	10	0.34265	1.89172	0.215216	0.67881
ENSG00000013573	ENST00000538740	10	0.34265	1.89172	0.215216	0.67881
ENSG00000013573	ENST00000536580	10	0.34265	1.89172	0.215216	0.67881
ENSG00000013573	ENST00000539699	10	0.34265	1.89172	0.215216	0.67881
ENSG00000013573	ENST00000542242	10	0.34265	1.89172	0.215216	0.67881
ENSG00000013573	ENST00000543511	10	0.34265	1.89172	0.215216	0.67881
ENSG00000013573	ENST00000535317	10	0.34265	1.89172	0.215216	0.67881
ENSG00000013583	ENST00000014930	4	0.452806	1.12948	0.280487	0.730845
ENSG00000013583	ENST00000536942	4	0.452806	1.12948	0.280487	0.730845
ENSG00000013583	ENST00000540916	4	0.452806	1.12948	0.280487	0.730845
ENSG00000013583	ENST00000535636	4	0.452806	1.12948	0.280487	0.730845
ENSG00000013588	ENST00000537783	2	0.0404419	0.360141	0.602722	0.895124
ENSG00000013588	ENST00000014914	2	0.0404419	0.360141	0.602722	0.895124
ENSG00000013619	ENST00000468306	3	0.565924	0	0.532257	0.867269
ENSG00000013619	ENST00000358892	3	0.565924	0	0.532257	0.867269
ENSG00000013619	ENST00000464149	3	0.565924	0	0.532257	0.867269
ENSG00000013725	ENST00000419282	2	1.34641	0	0.303181	0.747876
ENSG00000013725	ENST00000505761	2	1.34641	0	0.303181	0.747876
ENSG00000013810	ENST00000466077	7	0.179276	0	0.763778	0.945852
ENSG00000013810	ENST00000651817	7	0.179276	0	0.763778	0.945852
ENSG00000013810	ENST00000484651	7	0.179276	0	0.763778	0.945852
ENSG00000013810	ENST00000652770	7	0.179276	0	0.763778	0.945852
ENSG00000013810	ENST00000404054	7	0.179276	0	0.763778	0.945852
ENSG00000013810	ENST00000651472	7	0.179276	0	0.763778	0.945852
ENSG00000013810	ENST00000484264	7	0.179276	0	0.763778	0.945852
ENSG00000014123	ENST00000461673	2	4.20045	1.81631	0.0210814	0.314599
ENSG00000014123	ENST00000369278	2	4.20045	1.81631	0.0210814	0.314599
ENSG00000014138	ENST00000527850	6	2.57756	-0.280424	0.188444	0.649493
ENSG00000014138	ENST00000525924	6	2.57756	-0.280424	0.188444	0.649493
ENSG00000014138	ENST00000527618	6	2.57756	-0.280424	0.188444	0.649493
ENSG00000014138	ENST00000265465	6	2.57756	-0.280424	0.188444	0.649493
ENSG00000014138	ENST00000532469	6	2.57756	-0.280424	0.188444	0.649493
ENSG00000014138	ENST00000533192	6	2.57756	-0.280424	0.188444	0.649493
ENSG00000014164	ENST00000262577	2	0.0828658	0	0.805022	0.959986
ENSG00000014164	ENST00000528401	2	0.0828658	0	0.805022	0.959986
ENSG00000014216	ENST00000530495	11	0.094464	-2.08875	1	1
ENSG00000014216	ENST00000533820	11	0.094464	-2.08875	1	1
ENSG00000014216	ENST00000530442	11	0.094464	-2.08875	1	1
ENSG00000014216	ENST00000525013	11	0.094464	-2.08875	1	1
ENSG00000014216	ENST00000527323	11	0.094464	-2.08875	1	1
ENSG00000014216	ENST00000527887	11	0.094464	-2.08875	1	1
ENSG00000014216	ENST00000528165	11	0.094464	-2.08875	1	1
ENSG00000014216	ENST00000533079	11	0.094464	-2.08875	1	1
ENSG00000014216	ENST00000526468	11	0.094464	-2.08875	1	1
ENSG00000014216	ENST00000527897	11	0.094464	-2.08875	1	1
ENSG00000014216	ENST00000532285	11	0.094464	-2.08875	1	1
ENSG00000014257	ENST00000351273	2	6.21403	0.012541	0.0205511	0.310502
ENSG00000014257	ENST00000336375	2	6.21403	0.012541	0.0205511	0.310502
ENSG00000014641	ENST00000485155	8	1.79016	0.314046	0.227026	0.690866
ENSG00000014641	ENST00000472098	8	1.79016	0.314046	0.227026	0.690866
ENSG00000014641	ENST00000436321	8	1.79016	0.314046	0.227026	0.690866
ENSG00000014641	ENST00000442225	8	1.79016	0.314046	0.227026	0.690866
ENSG00000014641	ENST00000484538	8	1.79016	0.314046	0.227026	0.690866
ENSG00000014641	ENST00000495083	8	1.79016	0.314046	0.227026	0.690866
ENSG00000014641	ENST00000462944	8	1.79016	0.314046	0.227026	0.690866
ENSG00000014641	ENST00000485781	8	1.79016	0.314046	0.227026	0.690866
ENSG00000014824	ENST00000509683	5	2.42848	0	0.179677	0.640927
ENSG00000014824	ENST00000513699	5	2.42848	0	0.179677	0.640927
ENSG00000014824	ENST00000510460	5	2.42848	0	0.179677	0.640927
ENSG00000014824	ENST00000505523	5	2.42848	0	0.179677	0.640927
ENSG00000014824	ENST00000264451	5	2.42848	0	0.179677	0.640927
ENSG00000014914	ENST00000490310	4	0.304594	0	0.666167	0.916562
ENSG00000014914	ENST00000479272	4	0.304594	0	0.666167	0.916562
ENSG00000014914	ENST00000482025	4	0.304594	0	0.666167	0.916562
ENSG00000014914	ENST00000495054	4	0.304594	0	0.666167	0.916562
ENSG00000014919	ENST00000370483	3	2.90228	0.40343	0.10965	0.552042
ENSG00000014919	ENST00000497381	3	2.90228	0.40343	0.10965	0.552042
ENSG00000014919	ENST00000016171	3	2.90228	0.40343	0.10965	0.552042
ENSG00000015133	ENST00000555995	8	6.42813	2.0286	0.00813972	0.214242
ENSG00000015133	ENST00000389857	8	6.42813	2.0286	0.00813972	0.214242
ENSG00000015133	ENST00000557455	8	6.42813	2.0286	0.00813972	0.214242
ENSG00000015133	ENST00000554165	8	6.42813	2.0286	0.00813972	0.214242
ENSG00000015133	ENST00000554872	8	6.42813	2.0286	0.00813972	0.214242
ENSG00000015133	ENST00000556726	8	6.42813	2.0286	0.00813972	0.214242
ENSG00000015133	ENST00000556767	8	6.42813	2.0286	0.00813972	0.214242
ENSG00000015133	ENST00000553437	8	6.42813	2.0286	0.00813972	0.214242
ENSG00000015153	ENST00000547622	7	0.230359	0	0.726025	0.934977
ENSG00000015153	ENST00000551528	7	0.230359	0	0.726025	0.934977
ENSG00000015153	ENST00000550315	7	0.230359	0	0.726025	0.934977
ENSG00000015153	ENST00000327791	7	0.230359	0	0.726025	0.934977
ENSG00000015153	ENST00000547351	7	0.230359	0	0.726025	0.934977
ENSG00000015153	ENST00000546972	7	0.230359	0	0.726025	0.934977
ENSG00000015153	ENST00000552928	7	0.230359	0	0.726025	0.934977
ENSG00000015171	ENST00000397955	4	0.16173	0	0.753159	0.943313
ENSG00000015171	ENST00000473115	4	0.16173	0	0.753159	0.943313
ENSG00000015171	ENST00000381591	4	0.16173	0	0.753159	0.943313
ENSG00000015171	ENST00000488275	4	0.16173	0	0.753159	0.943313
ENSG00000015285	ENST00000450772	2	0.265727	0	0.648932	0.910639
ENSG00000015285	ENST00000376701	2	0.265727	0	0.648932	0.910639
ENSG00000015413	ENST00000568281	1	0.0958853	0	0.757841	0.944305
ENSG00000015475	ENST00000494097	1	0.000399033	0	0.984127	1
ENSG00000015479	ENST00000514488	5	1.26092	0	0.35188	0.781625
ENSG00000015479	ENST00000505625	5	1.26092	0	0.35188	0.781625
ENSG00000015479	ENST00000502944	5	1.26092	0	0.35188	0.781625
ENSG00000015479	ENST00000504643	5	1.26092	0	0.35188	0.781625
ENSG00000015479	ENST00000504023	5	1.26092	0	0.35188	0.781625
ENSG00000015532	ENST00000574840	2	0.454776	0	0.557651	0.877535
ENSG00000015532	ENST00000571021	2	0.454776	0	0.557651	0.877535
ENSG00000015568	ENST00000016946	3	0.515459	0.231241	0.455155	0.836572
ENSG00000015568	ENST00000432606	3	0.515459	0.231241	0.455155	0.836572
ENSG00000015568	ENST00000477523	3	0.515459	0.231241	0.455155	0.836572
ENSG00000015592	ENST00000350889	3	0.869245	0.600881	0.303001	0.747876
ENSG00000015592	ENST00000522750	3	0.869245	0.600881	0.303001	0.747876
ENSG00000015592	ENST00000519614	3	0.869245	0.600881	0.303001	0.747876
ENSG00000015676	ENST00000480209	8	6.14758	0	0.0250662	0.33616
ENSG00000015676	ENST00000472246	8	6.14758	0	0.0250662	0.33616
ENSG00000015676	ENST00000464812	8	6.14758	0	0.0250662	0.33616
ENSG00000015676	ENST00000460110	8	6.14758	0	0.0250662	0.33616
ENSG00000015676	ENST00000355451	8	6.14758	0	0.0250662	0.33616
ENSG00000015676	ENST00000338427	8	6.14758	0	0.0250662	0.33616
ENSG00000015676	ENST00000475952	8	6.14758	0	0.0250662	0.33616
ENSG00000015676	ENST00000497978	8	6.14758	0	0.0250662	0.33616
ENSG00000016391	ENST00000315251	2	6.02769	0	0.0230434	0.323582
ENSG00000016391	ENST00000481668	2	6.02769	0	0.0230434	0.323582
ENSG00000016602	ENST00000370563	1	5.91036	0	0.0178812	0.290195
ENSG00000016864	ENST00000479553	8	7.568e-05	0	0.995456	1
ENSG00000016864	ENST00000463762	8	7.568e-05	0	0.995456	1
ENSG00000016864	ENST00000497436	8	7.568e-05	0	0.995456	1
ENSG00000016864	ENST00000497953	8	7.568e-05	0	0.995456	1
ENSG00000016864	ENST00000394783	8	7.568e-05	0	0.995456	1
ENSG00000016864	ENST00000463827	8	7.568e-05	0	0.995456	1
ENSG00000016864	ENST00000485899	8	7.568e-05	0	0.995456	1
ENSG00000016864	ENST00000464705	8	7.568e-05	0	0.995456	1
ENSG00000017260	ENST00000508297	6	0.318714	0	0.674595	0.919975
ENSG00000017260	ENST00000514654	6	0.318714	0	0.674595	0.919975
ENSG00000017260	ENST00000510774	6	0.318714	0	0.674595	0.919975
ENSG00000017260	ENST00000513636	6	0.318714	0	0.674595	0.919975
ENSG00000017260	ENST00000515854	6	0.318714	0	0.674595	0.919975
ENSG00000017260	ENST00000509150	6	0.318714	0	0.674595	0.919975
ENSG00000017427	ENST00000337514	4	4.64775	0.7904	0.0361267	0.3768
ENSG00000017427	ENST00000424202	4	4.64775	0.7904	0.0361267	0.3768
ENSG00000017427	ENST00000307046	4	4.64775	0.7904	0.0361267	0.3768
ENSG00000017427	ENST00000481539	4	4.64775	0.7904	0.0361267	0.3768
ENSG00000017483	ENST00000595796	2	0.00899178	0	0.941707	0.995179
ENSG00000017483	ENST00000480105	2	0.00899178	0	0.941707	0.995179
ENSG00000017797	ENST00000585015	3	0.449325	0	0.575331	0.884466
ENSG00000017797	ENST00000609094	3	0.449325	0	0.575331	0.884466
ENSG00000017797	ENST00000577221	3	0.449325	0	0.575331	0.884466
ENSG00000018189	ENST00000515442	10	0.00121622	0.202207	0.746549	0.941221
ENSG00000018189	ENST00000226328	10	0.00121622	0.202207	0.746549	0.941221
ENSG00000018189	ENST00000417478	10	0.00121622	0.202207	0.746549	0.941221
ENSG00000018189	ENST00000503025	10	0.00121622	0.202207	0.746549	0.941221
ENSG00000018189	ENST00000504805	10	0.00121622	0.202207	0.746549	0.941221
ENSG00000018189	ENST00000381006	10	0.00121622	0.202207	0.746549	0.941221
ENSG00000018189	ENST00000512331	10	0.00121622	0.202207	0.746549	0.941221
ENSG00000018189	ENST00000502653	10	0.00121622	0.202207	0.746549	0.941221
ENSG00000018189	ENST00000515479	10	0.00121622	0.202207	0.746549	0.941221
ENSG00000018189	ENST00000513597	10	0.00121622	0.202207	0.746549	0.941221
ENSG00000018236	ENST00000347616	5	12.1945	0	0.00107178	0.0894764
ENSG00000018236	ENST00000548481	5	12.1945	0	0.00107178	0.0894764
ENSG00000018236	ENST00000548005	5	12.1945	0	0.00107178	0.0894764
ENSG00000018236	ENST00000547849	5	12.1945	0	0.00107178	0.0894764
ENSG00000018236	ENST00000550305	5	12.1945	0	0.00107178	0.0894764
ENSG00000018280	ENST00000490872	4	10.9291	0.00161101	0.00212766	0.118702
ENSG00000018280	ENST00000233202	4	10.9291	0.00161101	0.00212766	0.118702
ENSG00000018280	ENST00000490536	4	10.9291	0.00161101	0.00212766	0.118702
ENSG00000018280	ENST00000468221	4	10.9291	0.00161101	0.00212766	0.118702
ENSG00000018408	ENST00000474080	4	0.644809	5.16912	0.0288655	0.350612
ENSG00000018408	ENST00000494754	4	0.644809	5.16912	0.0288655	0.350612
ENSG00000018408	ENST00000465804	4	0.644809	5.16912	0.0288655	0.350612
ENSG00000018408	ENST00000485244	4	0.644809	5.16912	0.0288655	0.350612
ENSG00000018510	ENST00000642466	3	0.0111495	0	0.936639	0.994221
ENSG00000018510	ENST00000264167	3	0.0111495	0	0.936639	0.994221
ENSG00000018510	ENST00000460342	3	0.0111495	0	0.936639	0.994221
ENSG00000018607	ENST00000438300	1	0.815838	0	0.369808	0.792841
ENSG00000018610	ENST00000469448	2	0.343701	0	0.605434	0.896268
ENSG00000018610	ENST00000320339	2	0.343701	0	0.605434	0.896268
ENSG00000018625	ENST00000472488	5	11.9816	0	0.00129814	0.0953841
ENSG00000018625	ENST00000459972	5	11.9816	0	0.00129814	0.0953841
ENSG00000018625	ENST00000463989	5	11.9816	0	0.00129814	0.0953841
ENSG00000018625	ENST00000478587	5	11.9816	0	0.00129814	0.0953841
ENSG00000018625	ENST00000468587	5	11.9816	0	0.00129814	0.0953841
ENSG00000018699	ENST00000433416	3	2.60375	0	0.146223	0.602179
ENSG00000018699	ENST00000647819	3	2.60375	0	0.146223	0.602179
ENSG00000018699	ENST00000317907	3	2.60375	0	0.146223	0.602179
ENSG00000018869	ENST00000589143	2	4.69621	0	0.0407182	0.392319
ENSG00000018869	ENST00000301310	2	4.69621	0	0.0407182	0.392319
ENSG00000019102	ENST00000326621	1	7.48538	0	0.0080523	0.213497
ENSG00000019144	ENST00000527259	15	0.59571	2.52288	0.137317	0.592089
ENSG00000019144	ENST00000617208	15	0.59571	2.52288	0.137317	0.592089
ENSG00000019144	ENST00000526374	15	0.59571	2.52288	0.137317	0.592089
ENSG00000019144	ENST00000526537	15	0.59571	2.52288	0.137317	0.592089
ENSG00000019144	ENST00000620788	15	0.59571	2.52288	0.137317	0.592089
ENSG00000019144	ENST00000527500	15	0.59571	2.52288	0.137317	0.592089
ENSG00000019144	ENST00000612681	15	0.59571	2.52288	0.137317	0.592089
ENSG00000019144	ENST00000525226	15	0.59571	2.52288	0.137317	0.592089
ENSG00000019144	ENST00000525427	15	0.59571	2.52288	0.137317	0.592089
ENSG00000019144	ENST00000614369	15	0.59571	2.52288	0.137317	0.592089
ENSG00000019144	ENST00000532517	15	0.59571	2.52288	0.137317	0.592089
ENSG00000019144	ENST00000532639	15	0.59571	2.52288	0.137317	0.592089
ENSG00000019144	ENST00000392852	15	0.59571	2.52288	0.137317	0.592089
ENSG00000019144	ENST00000531987	15	0.59571	2.52288	0.137317	0.592089
ENSG00000019144	ENST00000526699	15	0.59571	2.52288	0.137317	0.592089
ENSG00000019169	ENST00000327097	1	5.98513	0	0.0172025	0.286038
ENSG00000019485	ENST00000622142	4	0.284563	0	0.670167	0.918184
ENSG00000019485	ENST00000424263	4	0.284563	0	0.670167	0.918184
ENSG00000019485	ENST00000534751	4	0.284563	0	0.670167	0.918184
ENSG00000019485	ENST00000526442	4	0.284563	0	0.670167	0.918184
ENSG00000019505	ENST00000020926	3	2.59612	0	0.149846	0.607448
ENSG00000019505	ENST00000528101	3	2.59612	0	0.149846	0.607448
ENSG00000019505	ENST00000533332	3	2.59612	0	0.149846	0.607448
ENSG00000019582	ENST00000517752	5	0.126732	1.82954	0.242201	0.702185
ENSG00000019582	ENST00000009530	5	0.126732	1.82954	0.242201	0.702185
ENSG00000019582	ENST00000518797	5	0.126732	1.82954	0.242201	0.702185
ENSG00000019582	ENST00000523813	5	0.126732	1.82954	0.242201	0.702185
ENSG00000019582	ENST00000522153	5	0.126732	1.82954	0.242201	0.702185
ENSG00000019991	ENST00000423064	2	0.0899913	0	0.809792	0.960772
ENSG00000019991	ENST00000643024	2	0.0899913	0	0.809792	0.960772
ENSG00000019995	ENST00000471421	2	0.116181	0	0.76939	0.947926
ENSG00000019995	ENST00000359653	2	0.116181	0	0.76939	0.947926
ENSG00000020129	ENST00000373253	5	0.223069	1.02974	0.346264	0.778074
ENSG00000020129	ENST00000459931	5	0.223069	1.02974	0.346264	0.778074
ENSG00000020129	ENST00000437806	5	0.223069	1.02974	0.346264	0.778074
ENSG00000020129	ENST00000423723	5	0.223069	1.02974	0.346264	0.778074
ENSG00000020129	ENST00000373243	5	0.223069	1.02974	0.346264	0.778074
ENSG00000020181	ENST00000412232	2	0.674577	0	0.464544	0.840571
ENSG00000020181	ENST00000315215	2	0.674577	0	0.464544	0.840571
ENSG00000020219	ENST00000465400	1	0.00012337	0	0.991173	1
ENSG00000020256	ENST00000467811	5	2.86528	0.186706	0.120435	0.570761
ENSG00000020256	ENST00000395979	5	2.86528	0.186706	0.120435	0.570761
ENSG00000020256	ENST00000371518	5	2.86528	0.186706	0.120435	0.570761
ENSG00000020256	ENST00000477786	5	2.86528	0.186706	0.120435	0.570761
ENSG00000020256	ENST00000371523	5	2.86528	0.186706	0.120435	0.570761
ENSG00000020426	ENST00000554641	5	0.044115	3.52982	0.0950274	0.52686
ENSG00000020426	ENST00000261245	5	0.044115	3.52982	0.0950274	0.52686
ENSG00000020426	ENST00000555545	5	0.044115	3.52982	0.0950274	0.52686
ENSG00000020426	ENST00000556525	5	0.044115	3.52982	0.0950274	0.52686
ENSG00000020426	ENST00000556764	5	0.044115	3.52982	0.0950274	0.52686
ENSG00000020577	ENST00000555112	7	0.298068	0	0.693158	0.926557
ENSG00000020577	ENST00000555719	7	0.298068	0	0.693158	0.926557
ENSG00000020577	ENST00000557692	7	0.298068	0	0.693158	0.926557
ENSG00000020577	ENST00000555192	7	0.298068	0	0.693158	0.926557
ENSG00000020577	ENST00000554335	7	0.298068	0	0.693158	0.926557
ENSG00000020577	ENST00000555091	7	0.298068	0	0.693158	0.926557
ENSG00000020577	ENST00000557013	7	0.298068	0	0.693158	0.926557
ENSG00000020922	ENST00000540013	3	3.18748	0	0.105346	0.544871
ENSG00000020922	ENST00000323929	3	3.18748	0	0.105346	0.544871
ENSG00000020922	ENST00000536144	3	3.18748	0	0.105346	0.544871
ENSG00000021300	ENST00000426191	7	0.155548	0	0.786929	0.953872
ENSG00000021300	ENST00000544532	7	0.155548	0	0.786929	0.953872
ENSG00000021300	ENST00000540157	7	0.155548	0	0.786929	0.953872
ENSG00000021300	ENST00000541760	7	0.155548	0	0.786929	0.953872
ENSG00000021300	ENST00000545106	7	0.155548	0	0.786929	0.953872
ENSG00000021300	ENST00000541597	7	0.155548	0	0.786929	0.953872
ENSG00000021300	ENST00000546251	7	0.155548	0	0.786929	0.953872
ENSG00000021355	ENST00000380739	3	2.31609	0.000227421	0.183968	0.644032
ENSG00000021355	ENST00000460260	3	2.31609	0.000227421	0.183968	0.644032
ENSG00000021355	ENST00000476896	3	2.31609	0.000227421	0.183968	0.644032
ENSG00000021488	ENST00000589659	2	0.122777	0	0.76345	0.945733
ENSG00000021488	ENST00000590465	2	0.122777	0	0.76345	0.945733
ENSG00000021574	ENST00000645400	4	0.361298	0	0.644142	0.90964
ENSG00000021574	ENST00000645159	4	0.361298	0	0.644142	0.90964
ENSG00000021574	ENST00000645550	4	0.361298	0	0.644142	0.90964
ENSG00000021574	ENST00000647007	4	0.361298	0	0.644142	0.90964
ENSG00000021645	ENST00000557594	10	0.726975	0	0.522272	0.863469
ENSG00000021645	ENST00000634499	10	0.726975	0	0.522272	0.863469
ENSG00000021645	ENST00000553631	10	0.726975	0	0.522272	0.863469
ENSG00000021645	ENST00000555073	10	0.726975	0	0.522272	0.863469
ENSG00000021645	ENST00000553803	10	0.726975	0	0.522272	0.863469
ENSG00000021645	ENST00000281127	10	0.726975	0	0.522272	0.863469
ENSG00000021645	ENST00000553363	10	0.726975	0	0.522272	0.863469
ENSG00000021645	ENST00000634266	10	0.726975	0	0.522272	0.863469
ENSG00000021645	ENST00000556003	10	0.726975	0	0.522272	0.863469
ENSG00000021645	ENST00000557081	10	0.726975	0	0.522272	0.863469
ENSG00000021762	ENST00000478260	9	0.00130354	7.11696	0.0162384	0.282307
ENSG00000021762	ENST00000534491	9	0.00130354	7.11696	0.0162384	0.282307
ENSG00000021762	ENST00000533721	9	0.00130354	7.11696	0.0162384	0.282307
ENSG00000021762	ENST00000528124	9	0.00130354	7.11696	0.0162384	0.282307
ENSG00000021762	ENST00000532951	9	0.00130354	7.11696	0.0162384	0.282307
ENSG00000021762	ENST00000530372	9	0.00130354	7.11696	0.0162384	0.282307
ENSG00000021762	ENST00000526122	9	0.00130354	7.11696	0.0162384	0.282307
ENSG00000021762	ENST00000477622	9	0.00130354	7.11696	0.0162384	0.282307
ENSG00000021762	ENST00000534157	9	0.00130354	7.11696	0.0162384	0.282307
ENSG00000021776	ENST00000558202	5	0.019059	0	0.92211	0.991119
ENSG00000021776	ENST00000543879	5	0.019059	0	0.92211	0.991119
ENSG00000021776	ENST00000559767	5	0.019059	0	0.92211	0.991119
ENSG00000021776	ENST00000156471	5	0.019059	0	0.92211	0.991119
ENSG00000021776	ENST00000559090	5	0.019059	0	0.92211	0.991119
ENSG00000021826	ENST00000479988	2	0.626027	0	0.483758	0.847805
ENSG00000021826	ENST00000645825	2	0.626027	0	0.483758	0.847805
ENSG00000022267	ENST00000628443	11	0.493155	-1.11241	1	1
ENSG00000022267	ENST00000652745	11	0.493155	-1.11241	1	1
ENSG00000022267	ENST00000458357	11	0.493155	-1.11241	1	1
ENSG00000022267	ENST00000625935	11	0.493155	-1.11241	1	1
ENSG00000022267	ENST00000477080	11	0.493155	-1.11241	1	1
ENSG00000022267	ENST00000543669	11	0.493155	-1.11241	1	1
ENSG00000022267	ENST00000628568	11	0.493155	-1.11241	1	1
ENSG00000022267	ENST00000630084	11	0.493155	-1.11241	1	1
ENSG00000022267	ENST00000370674	11	0.493155	-1.11241	1	1
ENSG00000022267	ENST00000630677	11	0.493155	-1.11241	1	1
ENSG00000022267	ENST00000394155	11	0.493155	-1.11241	1	1
ENSG00000022277	ENST00000357348	3	0.00701851	0.000470397	0.946294	0.996189
ENSG00000022277	ENST00000477573	3	0.00701851	0.000470397	0.946294	0.996189
ENSG00000022277	ENST00000484084	3	0.00701851	0.000470397	0.946294	0.996189
ENSG00000022355	ENST00000637827	6	0.254634	1.94012	0.212356	0.675774
ENSG00000022355	ENST00000635916	6	0.254634	1.94012	0.212356	0.675774
ENSG00000022355	ENST00000636340	6	0.254634	1.94012	0.212356	0.675774
ENSG00000022355	ENST00000636408	6	0.254634	1.94012	0.212356	0.675774
ENSG00000022355	ENST00000522651	6	0.254634	1.94012	0.212356	0.675774
ENSG00000022355	ENST00000393943	6	0.254634	1.94012	0.212356	0.675774
ENSG00000022556	ENST00000542755	3	0.188784	0	0.740099	0.939692
ENSG00000022556	ENST00000381637	3	0.188784	0	0.740099	0.939692
ENSG00000022556	ENST00000586512	3	0.188784	0	0.740099	0.939692
ENSG00000022567	ENST00000519986	4	1.29272	0	0.33745	0.772355
ENSG00000022567	ENST00000521804	4	1.29272	0	0.33745	0.772355
ENSG00000022567	ENST00000517878	4	1.29272	0	0.33745	0.772355
ENSG00000022567	ENST00000519067	4	1.29272	0	0.33745	0.772355
ENSG00000022840	ENST00000535417	9	3.16513	0	0.125199	0.575602
ENSG00000022840	ENST00000535395	9	3.16513	0	0.125199	0.575602
ENSG00000022840	ENST00000537997	9	3.16513	0	0.125199	0.575602
ENSG00000022840	ENST00000325954	9	3.16513	0	0.125199	0.575602
ENSG00000022840	ENST00000551139	9	3.16513	0	0.125199	0.575602
ENSG00000022840	ENST00000366112	9	3.16513	0	0.125199	0.575602
ENSG00000022840	ENST00000537376	9	3.16513	0	0.125199	0.575602
ENSG00000022840	ENST00000544124	9	3.16513	0	0.125199	0.575602
ENSG00000022840	ENST00000542701	9	3.16513	0	0.125199	0.575602
ENSG00000022976	ENST00000560568	7	0.334448	0	0.653802	0.911734
ENSG00000022976	ENST00000442396	7	0.334448	0	0.653802	0.911734
ENSG00000022976	ENST00000420933	7	0.334448	0	0.653802	0.911734
ENSG00000022976	ENST00000558850	7	0.334448	0	0.653802	0.911734
ENSG00000022976	ENST00000559098	7	0.334448	0	0.653802	0.911734
ENSG00000022976	ENST00000557803	7	0.334448	0	0.653802	0.911734
ENSG00000022976	ENST00000559185	7	0.334448	0	0.653802	0.911734
ENSG00000023041	ENST00000482410	4	0.392545	0	0.612585	0.898777
ENSG00000023041	ENST00000471035	4	0.392545	0	0.612585	0.898777
ENSG00000023041	ENST00000626395	4	0.392545	0	0.612585	0.898777
ENSG00000023041	ENST00000369405	4	0.392545	0	0.612585	0.898777
ENSG00000023171	ENST00000525945	13	3.63414	-0.2566	0.117766	0.56671
ENSG00000023171	ENST00000532581	13	3.63414	-0.2566	0.117766	0.56671
ENSG00000023171	ENST00000456860	13	3.63414	-0.2566	0.117766	0.56671
ENSG00000023171	ENST00000646146	13	3.63414	-0.2566	0.117766	0.56671
ENSG00000023171	ENST00000525757	13	3.63414	-0.2566	0.117766	0.56671
ENSG00000023171	ENST00000638157	13	3.63414	-0.2566	0.117766	0.56671
ENSG00000023171	ENST00000635736	13	3.63414	-0.2566	0.117766	0.56671
ENSG00000023171	ENST00000638086	13	3.63414	-0.2566	0.117766	0.56671
ENSG00000023171	ENST00000632815	13	3.63414	-0.2566	0.117766	0.56671
ENSG00000023171	ENST00000640939	13	3.63414	-0.2566	0.117766	0.56671
ENSG00000023171	ENST00000633087	13	3.63414	-0.2566	0.117766	0.56671
ENSG00000023171	ENST00000450171	13	3.63414	-0.2566	0.117766	0.56671
ENSG00000023171	ENST00000534764	13	3.63414	-0.2566	0.117766	0.56671
ENSG00000023191	ENST00000525701	6	0.143459	1.22732	0.33823	0.772752
ENSG00000023191	ENST00000534797	6	0.143459	1.22732	0.33823	0.772752
ENSG00000023191	ENST00000533592	6	0.143459	1.22732	0.33823	0.772752
ENSG00000023191	ENST00000525522	6	0.143459	1.22732	0.33823	0.772752
ENSG00000023191	ENST00000529368	6	0.143459	1.22732	0.33823	0.772752
ENSG00000023191	ENST00000528713	6	0.143459	1.22732	0.33823	0.772752
ENSG00000023228	ENST00000454195	3	0.744404	0	0.459268	0.838249
ENSG00000023228	ENST00000498520	3	0.744404	0	0.459268	0.838249
ENSG00000023228	ENST00000233190	3	0.744404	0	0.459268	0.838249
ENSG00000023287	ENST00000518211	2	0.77578	2.25264	0.115666	0.563075
ENSG00000023287	ENST00000522957	2	0.77578	2.25264	0.115666	0.563075
ENSG00000023318	ENST00000262455	1	0.0388601	0	0.844355	0.970798
ENSG00000023330	ENST00000459884	1	0.133992	0	0.715543	0.931998
ENSG00000023445	ENST00000263464	2	5.06798	0	0.0341151	0.369066
ENSG00000023445	ENST00000527309	2	5.06798	0	0.0341151	0.369066
ENSG00000023516	ENST00000025301	1	3.60453	0	0.0621609	0.455722
ENSG00000023572	ENST00000608166	1	0.00280428	0	0.957934	0.998965
ENSG00000023608	ENST00000216294	1	1.18019	0	0.281417	0.731466
ENSG00000023697	ENST00000531803	4	0.0568009	0	0.861329	0.976248
ENSG00000023697	ENST00000532573	4	0.0568009	0	0.861329	0.976248
ENSG00000023697	ENST00000524480	4	0.0568009	0	0.861329	0.976248
ENSG00000023697	ENST00000528821	4	0.0568009	0	0.861329	0.976248
ENSG00000023734	ENST00000536737	2	0.0330067	0	0.883363	0.980514
ENSG00000023734	ENST00000025399	2	0.0330067	0	0.883363	0.980514
ENSG00000023839	ENST00000370434	1	0.100317	0	0.752487	0.943152
ENSG00000023892	ENST00000316637	2	2.01389	0	0.209824	0.673204
ENSG00000023892	ENST00000468102	2	2.01389	0	0.209824	0.673204
ENSG00000023902	ENST00000369124	6	0.933983	-0.131123	0.4691	0.842161
ENSG00000023902	ENST00000502767	6	0.933983	-0.131123	0.4691	0.842161
ENSG00000023902	ENST00000369126	6	0.933983	-0.131123	0.4691	0.842161
ENSG00000023902	ENST00000492304	6	0.933983	-0.131123	0.4691	0.842161
ENSG00000023902	ENST00000607609	6	0.933983	-0.131123	0.4691	0.842161
ENSG00000023902	ENST00000485470	6	0.933983	-0.131123	0.4691	0.842161
ENSG00000023909	ENST00000370238	3	1.2816	0	0.325468	0.76305
ENSG00000023909	ENST00000462183	3	1.2816	0	0.325468	0.76305
ENSG00000023909	ENST00000615724	3	1.2816	0	0.325468	0.76305
ENSG00000024048	ENST00000372899	2	2.30875	0	0.158209	0.616447
ENSG00000024048	ENST00000372903	2	2.30875	0	0.158209	0.616447
ENSG00000024422	ENST00000263277	1	5.82033	0	0.0187448	0.297908
ENSG00000025039	ENST00000492783	2	2.05107	0	0.196599	0.659105
ENSG00000025039	ENST00000369415	2	2.05107	0	0.196599	0.659105
ENSG00000025156	ENST00000368455	2	0.0470512	0	0.857898	0.975296
ENSG00000025156	ENST00000452194	2	0.0470512	0	0.857898	0.975296
ENSG00000025293	ENST00000461122	10	1.49418	0.0422898	0.310093	0.754198
ENSG00000025293	ENST00000461405	10	1.49418	0.0422898	0.310093	0.754198
ENSG00000025293	ENST00000449988	10	1.49418	0.0422898	0.310093	0.754198
ENSG00000025293	ENST00000496305	10	1.49418	0.0422898	0.310093	0.754198
ENSG00000025293	ENST00000374000	10	1.49418	0.0422898	0.310093	0.754198
ENSG00000025293	ENST00000617560	10	1.49418	0.0422898	0.310093	0.754198
ENSG00000025293	ENST00000452270	10	1.49418	0.0422898	0.310093	0.754198
ENSG00000025293	ENST00000480940	10	1.49418	0.0422898	0.310093	0.754198
ENSG00000025293	ENST00000374012	10	1.49418	0.0422898	0.310093	0.754198
ENSG00000025293	ENST00000420233	10	1.49418	0.0422898	0.310093	0.754198
ENSG00000025434	ENST00000467728	4	1.05052	0	0.393183	0.804966
ENSG00000025434	ENST00000436778	4	1.05052	0	0.393183	0.804966
ENSG00000025434	ENST00000419652	4	1.05052	0	0.393183	0.804966
ENSG00000025434	ENST00000527949	4	1.05052	0	0.393183	0.804966
ENSG00000025708	ENST00000487162	2	7.12271	0	0.0132432	0.255363
ENSG00000025708	ENST00000651906	2	7.12271	0	0.0132432	0.255363
ENSG00000025770	ENST00000395698	4	0.0357659	0	0.885162	0.981347
ENSG00000025770	ENST00000522048	4	0.0357659	0	0.885162	0.981347
ENSG00000025770	ENST00000418794	4	0.0357659	0	0.885162	0.981347
ENSG00000025770	ENST00000420993	4	0.0357659	0	0.885162	0.981347
ENSG00000025772	ENST00000372813	1	0.969992	0	0.32844	0.765141
ENSG00000025796	ENST00000429168	9	15.4135	1.3364	0.00011313	0.027611
ENSG00000025796	ENST00000459782	9	15.4135	1.3364	0.00011313	0.027611
ENSG00000025796	ENST00000465210	9	15.4135	1.3364	0.00011313	0.027611
ENSG00000025796	ENST00000473746	9	15.4135	1.3364	0.00011313	0.027611
ENSG00000025796	ENST00000466419	9	15.4135	1.3364	0.00011313	0.027611
ENSG00000025796	ENST00000460009	9	15.4135	1.3364	0.00011313	0.027611
ENSG00000025796	ENST00000369002	9	15.4135	1.3364	0.00011313	0.027611
ENSG00000025796	ENST00000489455	9	15.4135	1.3364	0.00011313	0.027611
ENSG00000025796	ENST00000484803	9	15.4135	1.3364	0.00011313	0.027611
ENSG00000025800	ENST00000373625	2	0.544507	0	0.522642	0.863502
ENSG00000025800	ENST00000469790	2	0.544507	0	0.522642	0.863502
ENSG00000026025	ENST00000495528	4	2.63296	6.8238	0.00437573	0.164966
ENSG00000026025	ENST00000497849	4	2.63296	6.8238	0.00437573	0.164966
ENSG00000026025	ENST00000485947	4	2.63296	6.8238	0.00437573	0.164966
ENSG00000026025	ENST00000469543	4	2.63296	6.8238	0.00437573	0.164966
ENSG00000026036	ENST00000480273	2	5.10404	0	0.0370642	0.37913
ENSG00000026036	ENST00000496281	2	5.10404	0	0.0370642	0.37913
ENSG00000026297	ENST00000467705	9	0.0758083	0	0.858216	0.975296
ENSG00000026297	ENST00000620173	9	0.0758083	0	0.858216	0.975296
ENSG00000026297	ENST00000611959	9	0.0758083	0	0.858216	0.975296
ENSG00000026297	ENST00000358165	9	0.0758083	0	0.858216	0.975296
ENSG00000026297	ENST00000508775	9	0.0758083	0	0.858216	0.975296
ENSG00000026297	ENST00000421787	9	0.0758083	0	0.858216	0.975296
ENSG00000026297	ENST00000510083	9	0.0758083	0	0.858216	0.975296
ENSG00000026297	ENST00000499370	9	0.0758083	0	0.858216	0.975296
ENSG00000026297	ENST00000366855	9	0.0758083	0	0.858216	0.975296
ENSG00000026508	ENST00000531118	5	2.69346	0	0.160636	0.619355
ENSG00000026508	ENST00000442151	5	2.69346	0	0.160636	0.619355
ENSG00000026508	ENST00000528922	5	2.69346	0	0.160636	0.619355
ENSG00000026508	ENST00000525209	5	2.69346	0	0.160636	0.619355
ENSG00000026508	ENST00000526025	5	2.69346	0	0.160636	0.619355
ENSG00000026559	ENST00000433903	3	2.87708	0	0.125694	0.576298
ENSG00000026559	ENST00000447736	3	2.87708	0	0.125694	0.576298
ENSG00000026559	ENST00000506387	3	2.87708	0	0.125694	0.576298
ENSG00000026652	ENST00000366905	4	0.286101	0.399475	0.512253	0.85993
ENSG00000026652	ENST00000320285	4	0.286101	0.399475	0.512253	0.85993
ENSG00000026652	ENST00000436279	4	0.286101	0.399475	0.512253	0.85993
ENSG00000026652	ENST00000437165	4	0.286101	0.399475	0.512253	0.85993
ENSG00000026751	ENST00000484221	1	1.2895	0	0.260401	0.717642
ENSG00000026950	ENST00000465690	2	1.29588	0.0638191	0.289814	0.736993
ENSG00000026950	ENST00000502361	2	1.29588	0.0638191	0.289814	0.736993
ENSG00000027001	ENST00000494139	4	0.376832	2.30405	0.1473	0.603449
ENSG00000027001	ENST00000469167	4	0.376832	2.30405	0.1473	0.603449
ENSG00000027001	ENST00000382172	4	0.376832	2.30405	0.1473	0.603449
ENSG00000027001	ENST00000464194	4	0.376832	2.30405	0.1473	0.603449
ENSG00000027075	ENST00000554835	14	0.178176	0	0.779533	0.951385
ENSG00000027075	ENST00000553831	14	0.178176	0	0.779533	0.951385
ENSG00000027075	ENST00000552875	14	0.178176	0	0.779533	0.951385
ENSG00000027075	ENST00000556245	14	0.178176	0	0.779533	0.951385
ENSG00000027075	ENST00000556164	14	0.178176	0	0.779533	0.951385
ENSG00000027075	ENST00000332981	14	0.178176	0	0.779533	0.951385
ENSG00000027075	ENST00000553830	14	0.178176	0	0.779533	0.951385
ENSG00000027075	ENST00000555233	14	0.178176	0	0.779533	0.951385
ENSG00000027075	ENST00000555110	14	0.178176	0	0.779533	0.951385
ENSG00000027075	ENST00000557585	14	0.178176	0	0.779533	0.951385
ENSG00000027075	ENST00000557559	14	0.178176	0	0.779533	0.951385
ENSG00000027075	ENST00000555604	14	0.178176	0	0.779533	0.951385
ENSG00000027075	ENST00000555082	14	0.178176	0	0.779533	0.951385
ENSG00000027075	ENST00000553265	14	0.178176	0	0.779533	0.951385
ENSG00000027644	ENST00000368195	1	0.278399	0	0.599588	0.893975
ENSG00000027697	ENST00000478333	1	1.04965	0	0.309468	0.753723
ENSG00000027847	ENST00000505145	5	0.382807	-0.829924	1	1
ENSG00000027847	ENST00000505468	5	0.382807	-0.829924	1	1
ENSG00000027847	ENST00000507061	5	0.382807	-0.829924	1	1
ENSG00000027847	ENST00000515353	5	0.382807	-0.829924	1	1
ENSG00000027847	ENST00000510761	5	0.382807	-0.829924	1	1
ENSG00000028116	ENST00000428021	2	0.577929	0.135611	0.473478	0.844173
ENSG00000028116	ENST00000432057	2	0.577929	0.135611	0.473478	0.844173
ENSG00000028203	ENST00000548455	10	0.324303	3.84984	0.0751314	0.483488
ENSG00000028203	ENST00000546398	10	0.324303	3.84984	0.0751314	0.483488
ENSG00000028203	ENST00000549589	10	0.324303	3.84984	0.0751314	0.483488
ENSG00000028203	ENST00000397792	10	0.324303	3.84984	0.0751314	0.483488
ENSG00000028203	ENST00000551792	10	0.324303	3.84984	0.0751314	0.483488
ENSG00000028203	ENST00000546409	10	0.324303	3.84984	0.0751314	0.483488
ENSG00000028203	ENST00000552827	10	0.324303	3.84984	0.0751314	0.483488
ENSG00000028203	ENST00000549192	10	0.324303	3.84984	0.0751314	0.483488
ENSG00000028203	ENST00000547484	10	0.324303	3.84984	0.0751314	0.483488
ENSG00000028203	ENST00000436874	10	0.324303	3.84984	0.0751314	0.483488
ENSG00000028277	ENST00000532176	10	5.79252	2.56003	0.00836404	0.217366
ENSG00000028277	ENST00000524801	10	5.79252	2.56003	0.00836404	0.217366
ENSG00000028277	ENST00000560804	10	5.79252	2.56003	0.00836404	0.217366
ENSG00000028277	ENST00000534559	10	5.79252	2.56003	0.00836404	0.217366
ENSG00000028277	ENST00000636631	10	5.79252	2.56003	0.00836404	0.217366
ENSG00000028277	ENST00000531773	10	5.79252	2.56003	0.00836404	0.217366
ENSG00000028277	ENST00000526831	10	5.79252	2.56003	0.00836404	0.217366
ENSG00000028277	ENST00000530982	10	5.79252	2.56003	0.00836404	0.217366
ENSG00000028277	ENST00000389341	10	5.79252	2.56003	0.00836404	0.217366
ENSG00000028277	ENST00000598842	10	5.79252	2.56003	0.00836404	0.217366
ENSG00000028310	ENST00000490814	9	0.053932	1.17117	0.373522	0.794175
ENSG00000028310	ENST00000494422	9	0.053932	1.17117	0.373522	0.794175
ENSG00000028310	ENST00000493082	9	0.053932	1.17117	0.373522	0.794175
ENSG00000028310	ENST00000483234	9	0.053932	1.17117	0.373522	0.794175
ENSG00000028310	ENST00000489816	9	0.053932	1.17117	0.373522	0.794175
ENSG00000028310	ENST00000489093	9	0.053932	1.17117	0.373522	0.794175
ENSG00000028310	ENST00000497410	9	0.053932	1.17117	0.373522	0.794175
ENSG00000028310	ENST00000495794	9	0.053932	1.17117	0.373522	0.794175
ENSG00000028310	ENST00000475706	9	0.053932	1.17117	0.373522	0.794175
ENSG00000028528	ENST00000560829	6	0.577206	0	0.549531	0.874943
ENSG00000028528	ENST00000559339	6	0.577206	0	0.549531	0.874943
ENSG00000028528	ENST00000559401	6	0.577206	0	0.549531	0.874943
ENSG00000028528	ENST00000560260	6	0.577206	0	0.549531	0.874943
ENSG00000028528	ENST00000559961	6	0.577206	0	0.549531	0.874943
ENSG00000028528	ENST00000558040	6	0.577206	0	0.549531	0.874943
ENSG00000028839	ENST00000481694	3	2.08339	0	0.194412	0.656267
ENSG00000028839	ENST00000367869	3	2.08339	0	0.194412	0.656267
ENSG00000028839	ENST00000237264	3	2.08339	0	0.194412	0.656267
ENSG00000029153	ENST00000544915	2	1.07906	0	0.364198	0.790332
ENSG00000029153	ENST00000539558	2	1.07906	0	0.364198	0.790332
ENSG00000029363	ENST00000476194	7	0.202128	0	0.746187	0.941163
ENSG00000029363	ENST00000529522	7	0.202128	0	0.746187	0.941163
ENSG00000029363	ENST00000534269	7	0.202128	0	0.746187	0.941163
ENSG00000029363	ENST00000534321	7	0.202128	0	0.746187	0.941163
ENSG00000029363	ENST00000529917	7	0.202128	0	0.746187	0.941163
ENSG00000029363	ENST00000528229	7	0.202128	0	0.746187	0.941163
ENSG00000029363	ENST00000640069	7	0.202128	0	0.746187	0.941163
ENSG00000029364	ENST00000554059	2	2.10539	0	0.186072	0.647217
ENSG00000029364	ENST00000554023	2	2.10539	0	0.186072	0.647217
ENSG00000029534	ENST00000524227	5	4.7151	0	0.0542459	0.432145
ENSG00000029534	ENST00000518715	5	4.7151	0	0.0542459	0.432145
ENSG00000029534	ENST00000265709	5	4.7151	0	0.0542459	0.432145
ENSG00000029534	ENST00000521407	5	4.7151	0	0.0542459	0.432145
ENSG00000029534	ENST00000522543	5	4.7151	0	0.0542459	0.432145
ENSG00000029559	ENST00000226284	1	0.244729	0	0.622516	0.902527
ENSG00000029639	ENST00000489874	7	0.985199	3.84498	0.0494386	0.414967
ENSG00000029639	ENST00000475849	7	0.985199	3.84498	0.0494386	0.414967
ENSG00000029639	ENST00000495806	7	0.985199	3.84498	0.0494386	0.414967
ENSG00000029639	ENST00000367166	7	0.985199	3.84498	0.0494386	0.414967
ENSG00000029639	ENST00000466349	7	0.985199	3.84498	0.0494386	0.414967
ENSG00000029639	ENST00000480390	7	0.985199	3.84498	0.0494386	0.414967
ENSG00000029639	ENST00000487586	7	0.985199	3.84498	0.0494386	0.414967
ENSG00000029725	ENST00000537505	6	0.0170569	0	0.929925	0.992812
ENSG00000029725	ENST00000572250	6	0.0170569	0	0.929925	0.992812
ENSG00000029725	ENST00000575475	6	0.0170569	0	0.929925	0.992812
ENSG00000029725	ENST00000570487	6	0.0170569	0	0.929925	0.992812
ENSG00000029725	ENST00000575991	6	0.0170569	0	0.929925	0.992812
ENSG00000029725	ENST00000574568	6	0.0170569	0	0.929925	0.992812
ENSG00000029993	ENST00000325307	1	0.0301052	0	0.862808	0.97675
ENSG00000030066	ENST00000528071	8	0.0534347	0	0.873697	0.978633
ENSG00000030066	ENST00000526870	8	0.0534347	0	0.873697	0.978633
ENSG00000030066	ENST00000531016	8	0.0534347	0	0.873697	0.978633
ENSG00000030066	ENST00000527126	8	0.0534347	0	0.873697	0.978633
ENSG00000030066	ENST00000532773	8	0.0534347	0	0.873697	0.978633
ENSG00000030066	ENST00000378460	8	0.0534347	0	0.873697	0.978633
ENSG00000030066	ENST00000526569	8	0.0534347	0	0.873697	0.978633
ENSG00000030066	ENST00000528501	8	0.0534347	0	0.873697	0.978633
ENSG00000030110	ENST00000442998	1	0.918802	0	0.341419	0.775105
ENSG00000030419	ENST00000484040	3	0.0424188	0	0.873572	0.978633
ENSG00000030419	ENST00000442445	3	0.0424188	0	0.873572	0.978633
ENSG00000030419	ENST00000431520	3	0.0424188	0	0.873572	0.978633
ENSG00000030582	ENST00000585348	2	0.00427514	0	0.957258	0.998863
ENSG00000030582	ENST00000588170	2	0.00427514	0	0.957258	0.998863
ENSG00000031003	ENST00000513640	5	0.128664	0	0.782766	0.95228
ENSG00000031003	ENST00000510804	5	0.128664	0	0.782766	0.95228
ENSG00000031003	ENST00000425075	5	0.128664	0	0.782766	0.95228
ENSG00000031003	ENST00000033079	5	0.128664	0	0.782766	0.95228
ENSG00000031003	ENST00000505281	5	0.128664	0	0.782766	0.95228
ENSG00000031081	ENST00000264245	1	6.37748	0	0.0140618	0.263325
ENSG00000031691	ENST00000335783	1	2.25821	0	0.138235	0.592259
ENSG00000031698	ENST00000482384	3	0.357546	0	0.643132	0.909475
ENSG00000031698	ENST00000468588	3	0.357546	0	0.643132	0.909475
ENSG00000031698	ENST00000471705	3	0.357546	0	0.643132	0.909475
ENSG00000031823	ENST00000587411	8	0.0100587	0	0.946951	0.996375
ENSG00000031823	ENST00000587799	8	0.0100587	0	0.946951	0.996375
ENSG00000031823	ENST00000586344	8	0.0100587	0	0.946951	0.996375
ENSG00000031823	ENST00000591333	8	0.0100587	0	0.946951	0.996375
ENSG00000031823	ENST00000592771	8	0.0100587	0	0.946951	0.996375
ENSG00000031823	ENST00000591124	8	0.0100587	0	0.946951	0.996375
ENSG00000031823	ENST00000593025	8	0.0100587	0	0.946951	0.996375
ENSG00000031823	ENST00000592266	8	0.0100587	0	0.946951	0.996375
ENSG00000032219	ENST00000431317	8	0.136585	0	0.794152	0.956104
ENSG00000032219	ENST00000424658	8	0.136585	0	0.794152	0.956104
ENSG00000032219	ENST00000431612	8	0.136585	0	0.794152	0.956104
ENSG00000032219	ENST00000553355	8	0.136585	0	0.794152	0.956104
ENSG00000032219	ENST00000417477	8	0.136585	0	0.794152	0.956104
ENSG00000032219	ENST00000355431	8	0.136585	0	0.794152	0.956104
ENSG00000032219	ENST00000466065	8	0.136585	0	0.794152	0.956104
ENSG00000032219	ENST00000469635	8	0.136585	0	0.794152	0.956104
ENSG00000032389	ENST00000496433	8	1.74799	0	0.274138	0.727305
ENSG00000032389	ENST00000443925	8	1.74799	0	0.274138	0.727305
ENSG00000032389	ENST00000470625	8	1.74799	0	0.274138	0.727305
ENSG00000032389	ENST00000463662	8	1.74799	0	0.274138	0.727305
ENSG00000032389	ENST00000398659	8	1.74799	0	0.274138	0.727305
ENSG00000032389	ENST00000462515	8	1.74799	0	0.274138	0.727305
ENSG00000032389	ENST00000478754	8	1.74799	0	0.274138	0.727305
ENSG00000032389	ENST00000406835	8	1.74799	0	0.274138	0.727305
ENSG00000032444	ENST00000594864	11	0.174028	0.372422	0.580415	0.88635
ENSG00000032444	ENST00000595889	11	0.174028	0.372422	0.580415	0.88635
ENSG00000032444	ENST00000598462	11	0.174028	0.372422	0.580415	0.88635
ENSG00000032444	ENST00000602191	11	0.174028	0.372422	0.580415	0.88635
ENSG00000032444	ENST00000646984	11	0.174028	0.372422	0.580415	0.88635
ENSG00000032444	ENST00000594754	11	0.174028	0.372422	0.580415	0.88635
ENSG00000032444	ENST00000599951	11	0.174028	0.372422	0.580415	0.88635
ENSG00000032444	ENST00000597202	11	0.174028	0.372422	0.580415	0.88635
ENSG00000032444	ENST00000545201	11	0.174028	0.372422	0.580415	0.88635
ENSG00000032444	ENST00000595352	11	0.174028	0.372422	0.580415	0.88635
ENSG00000032444	ENST00000600737	11	0.174028	0.372422	0.580415	0.88635
ENSG00000032742	ENST00000461115	2	2.97729	0.752369	0.0730468	0.478787
ENSG00000032742	ENST00000537103	2	2.97729	0.752369	0.0730468	0.478787
ENSG00000033011	ENST00000592793	3	0.212654	0	0.704492	0.928639
ENSG00000033011	ENST00000592661	3	0.212654	0	0.704492	0.928639
ENSG00000033011	ENST00000591822	3	0.212654	0	0.704492	0.928639
ENSG00000033030	ENST00000536663	8	0.0515095	0.805707	0.464511	0.840571
ENSG00000033030	ENST00000633063	8	0.0515095	0.805707	0.464511	0.840571
ENSG00000033030	ENST00000544054	8	0.0515095	0.805707	0.464511	0.840571
ENSG00000033030	ENST00000538493	8	0.0515095	0.805707	0.464511	0.840571
ENSG00000033030	ENST00000543897	8	0.0515095	0.805707	0.464511	0.840571
ENSG00000033030	ENST00000542892	8	0.0515095	0.805707	0.464511	0.840571
ENSG00000033030	ENST00000546149	8	0.0515095	0.805707	0.464511	0.840571
ENSG00000033030	ENST00000538116	8	0.0515095	0.805707	0.464511	0.840571
ENSG00000033050	ENST00000287844	5	3.18786	0	0.113742	0.559013
ENSG00000033050	ENST00000477252	5	3.18786	0	0.113742	0.559013
ENSG00000033050	ENST00000441774	5	3.18786	0	0.113742	0.559013
ENSG00000033050	ENST00000468073	5	3.18786	0	0.113742	0.559013
ENSG00000033050	ENST00000473874	5	3.18786	0	0.113742	0.559013
ENSG00000033100	ENST00000465601	2	3.8043	0	0.0694417	0.472426
ENSG00000033100	ENST00000035307	2	3.8043	0	0.0694417	0.472426
ENSG00000033122	ENST00000607936	6	7.94072	0	0.0102742	0.230615
ENSG00000033122	ENST00000310961	6	7.94072	0	0.0102742	0.230615
ENSG00000033122	ENST00000441830	6	7.94072	0	0.0102742	0.230615
ENSG00000033122	ENST00000651989	6	7.94072	0	0.0102742	0.230615
ENSG00000033122	ENST00000565615	6	7.94072	0	0.0102742	0.230615
ENSG00000033122	ENST00000370958	6	7.94072	0	0.0102742	0.230615
ENSG00000033170	ENST00000360689	6	4.04215	2.70614	0.0181007	0.291631
ENSG00000033170	ENST00000554765	6	4.04215	2.70614	0.0181007	0.291631
ENSG00000033170	ENST00000554667	6	4.04215	2.70614	0.0181007	0.291631
ENSG00000033170	ENST00000358307	6	4.04215	2.70614	0.0181007	0.291631
ENSG00000033170	ENST00000556518	6	4.04215	2.70614	0.0181007	0.291631
ENSG00000033170	ENST00000553924	6	4.04215	2.70614	0.0181007	0.291631
ENSG00000033178	ENST00000429659	3	1.04743	0	0.389249	0.802543
ENSG00000033178	ENST00000322244	3	1.04743	0	0.389249	0.802543
ENSG00000033178	ENST00000420827	3	1.04743	0	0.389249	0.802543
ENSG00000033327	ENST00000528329	6	0.16754	0.0604433	0.726984	0.935301
ENSG00000033327	ENST00000530915	6	0.16754	0.0604433	0.726984	0.935301
ENSG00000033327	ENST00000534823	6	0.16754	0.0604433	0.726984	0.935301
ENSG00000033327	ENST00000526030	6	0.16754	0.0604433	0.726984	0.935301
ENSG00000033327	ENST00000528886	6	0.16754	0.0604433	0.726984	0.935301
ENSG00000033327	ENST00000340149	6	0.16754	0.0604433	0.726984	0.935301
ENSG00000033627	ENST00000587375	13	0.528304	0	0.591986	0.890395
ENSG00000033627	ENST00000587882	13	0.528304	0	0.591986	0.890395
ENSG00000033627	ENST00000592324	13	0.528304	0	0.591986	0.890395
ENSG00000033627	ENST00000592831	13	0.528304	0	0.591986	0.890395
ENSG00000033627	ENST00000589213	13	0.528304	0	0.591986	0.890395
ENSG00000033627	ENST00000589759	13	0.528304	0	0.591986	0.890395
ENSG00000033627	ENST00000588629	13	0.528304	0	0.591986	0.890395
ENSG00000033627	ENST00000586001	13	0.528304	0	0.591986	0.890395
ENSG00000033627	ENST00000588806	13	0.528304	0	0.591986	0.890395
ENSG00000033627	ENST00000586315	13	0.528304	0	0.591986	0.890395
ENSG00000033627	ENST00000587824	13	0.528304	0	0.591986	0.890395
ENSG00000033627	ENST00000585828	13	0.528304	0	0.591986	0.890395
ENSG00000033627	ENST00000588138	13	0.528304	0	0.591986	0.890395
ENSG00000033800	ENST00000562190	7	4.52232e-05	0	0.996582	1
ENSG00000033800	ENST00000564915	7	4.52232e-05	0	0.996582	1
ENSG00000033800	ENST00000564009	7	4.52232e-05	0	0.996582	1
ENSG00000033800	ENST00000249636	7	4.52232e-05	0	0.996582	1
ENSG00000033800	ENST00000567417	7	4.52232e-05	0	0.996582	1
ENSG00000033800	ENST00000611270	7	4.52232e-05	0	0.996582	1
ENSG00000033800	ENST00000545237	7	4.52232e-05	0	0.996582	1
ENSG00000033867	ENST00000425128	5	2.80398	5.38966e-05	0.14572	0.601738
ENSG00000033867	ENST00000428179	5	2.80398	5.38966e-05	0.14572	0.601738
ENSG00000033867	ENST00000491211	5	2.80398	5.38966e-05	0.14572	0.601738
ENSG00000033867	ENST00000428005	5	2.80398	5.38966e-05	0.14572	0.601738
ENSG00000033867	ENST00000475120	5	2.80398	5.38966e-05	0.14572	0.601738
ENSG00000034053	ENST00000558358	7	0.982637	0.639507	0.294502	0.741025
ENSG00000034053	ENST00000558206	7	0.982637	0.639507	0.294502	0.741025
ENSG00000034053	ENST00000559709	7	0.982637	0.639507	0.294502	0.741025
ENSG00000034053	ENST00000382938	7	0.982637	0.639507	0.294502	0.741025
ENSG00000034053	ENST00000559814	7	0.982637	0.639507	0.294502	0.741025
ENSG00000034053	ENST00000560283	7	0.982637	0.639507	0.294502	0.741025
ENSG00000034053	ENST00000558804	7	0.982637	0.639507	0.294502	0.741025
ENSG00000034152	ENST00000583508	5	0.000589796	0.388081	0.622848	0.902527
ENSG00000034152	ENST00000477540	5	0.000589796	0.388081	0.622848	0.902527
ENSG00000034152	ENST00000527123	5	0.000589796	0.388081	0.622848	0.902527
ENSG00000034152	ENST00000534743	5	0.000589796	0.388081	0.622848	0.902527
ENSG00000034152	ENST00000529517	5	0.000589796	0.388081	0.622848	0.902527
ENSG00000034239	ENST00000433756	3	0.623181	0	0.521162	0.863469
ENSG00000034239	ENST00000521002	3	0.623181	0	0.521162	0.863469
ENSG00000034239	ENST00000262103	3	0.623181	0	0.521162	0.863469
ENSG00000034510	ENST00000233143	1	1.099	0	0.298463	0.743503
ENSG00000034533	ENST00000505545	3	0.117589	0	0.787826	0.953934
ENSG00000034533	ENST00000507978	3	0.117589	0	0.787826	0.953934
ENSG00000034533	ENST00000514044	3	0.117589	0	0.787826	0.953934
ENSG00000034677	ENST00000524233	5	0.706684	-0.506578	0.731247	0.936796
ENSG00000034677	ENST00000520903	5	0.706684	-0.506578	0.731247	0.936796
ENSG00000034677	ENST00000520071	5	0.706684	-0.506578	0.731247	0.936796
ENSG00000034677	ENST00000519342	5	0.706684	-0.506578	0.731247	0.936796
ENSG00000034677	ENST00000523167	5	0.706684	-0.506578	0.731247	0.936796
ENSG00000034693	ENST00000367591	1	0.461869	0	0.499218	0.855015
ENSG00000034713	ENST00000568455	3	0.306174	3.90598	0.0604225	0.450741
ENSG00000034713	ENST00000565057	3	0.306174	3.90598	0.0604225	0.450741
ENSG00000034713	ENST00000565985	3	0.306174	3.90598	0.0604225	0.450741
ENSG00000035115	ENST00000497051	11	0.693251	0	0.520545	0.863342
ENSG00000035115	ENST00000463865	11	0.693251	0	0.520545	0.863342
ENSG00000035115	ENST00000402632	11	0.693251	0	0.520545	0.863342
ENSG00000035115	ENST00000488979	11	0.693251	0	0.520545	0.863342
ENSG00000035115	ENST00000472012	11	0.693251	0	0.520545	0.863342
ENSG00000035115	ENST00000460974	11	0.693251	0	0.520545	0.863342
ENSG00000035115	ENST00000403657	11	0.693251	0	0.520545	0.863342
ENSG00000035115	ENST00000468321	11	0.693251	0	0.520545	0.863342
ENSG00000035115	ENST00000602998	11	0.693251	0	0.520545	0.863342
ENSG00000035115	ENST00000471948	11	0.693251	0	0.520545	0.863342
ENSG00000035115	ENST00000605370	11	0.693251	0	0.520545	0.863342
ENSG00000035141	ENST00000460307	2	0.024498	0	0.894863	0.984065
ENSG00000035141	ENST00000498665	2	0.024498	0	0.894863	0.984065
ENSG00000035403	ENST00000461383	4	0.848481	0	0.453593	0.836258
ENSG00000035403	ENST00000372755	4	0.848481	0	0.453593	0.836258
[truncated: 75,306 more rows]

## Sheet: B
Pathway analysis of RE2C detected DGEs in SCZ vs Control dopa neurons FDR < 0.05
Dataset	Pathways	pval	odds.ratio	Bonf_AdjP
concordant Downregulated genes:28	Interaction Between L1 and Ankyrins (Re)	2.54049e-09	367.64	3.49826e-05
concordant Downregulated genes:28	L1CAM Interactions (Re)	6.02683e-07	87.7018	0.00829895
discordant genes:97	Vocalization Behavior (GO)	8.29661e-07	72.9733	0.0114244
discordant genes:97	RUNX1 Interacts With CO Factors Whose Precise Effect On RUNX1 Targets Is NOT Known (Re)	9.57375e-07	33.5968	0.0131831
Concordant Upregulated genes:104	Tube Development (GO)	1.58948e-06	4.62018	0.0218872
Concordant Upregulated genes:104	Respiratory System Development (GO)	2.81073e-06	10.3301	0.0387038
discordant genes:97	Protein Protein Interactions AT Synapses (Re)	3.35148e-06	16.8061	0.0461499
discordant genes:97	Actin Filament Based Process (GO)	6.21448e-06	4.82808	0.0855733
discordant genes:97	Transcriptional Reg. By RUNX1 (Re)	6.78535e-06	9.09571	0.0934343
Concordant Upregulated genes:104	Extracellular Matrix Organization (Re)	7.56007e-06	7.6365	0.104102
Concordant Upregulated genes:104	Response to Organic Cyclic Compound (GO)	1.07098e-05	4.35291	0.147473
Concordant Upregulated genes:104	Response to Growth Factor (GO)	1.20677e-05	4.85835	0.166173
Concordant Upregulated genes:104	Response to Fluid Shear Stress (GO)	1.44524e-05	31.8095	0.19901
Concordant Upregulated genes:104	Cytokine Cytokine Receptor Interaction (KG)	1.94508e-05	7.82735	0.267838
discordant genes:97	L1CAM Interactions (Re)	2.08118e-05	11.9884	0.286579
discordant genes:97	Neuronal System (Re)	2.1453e-05	5.892	0.295408
discordant genes:97	Caspase Mediated Cleavage of Cytoskeletal Proteins (Re)	2.21392e-05	72.0863	0.304856
Concordant Upregulated genes:104	Core Matrisome (Na)	2.70764e-05	7.45887	0.372842
discordant genes:97	RAC1 Reg Pathway (PI)	3.10715e-05	25.7849	0.427855
Concordant Upregulated genes:104	Response to Laminar Fluid Shear Stress (GO)	3.14272e-05	62.0804	0.432752
Concordant Upregulated genes:104	Elastic Fibre Formation (Re)	5.04967e-05	22.4798	0.695339
Concordant Upregulated genes:104	Embryo Implantation (GO)	5.51162e-05	21.9498	0.75895
discordant genes:97	Reg. of Cellular Component Biogenesis (GO)	6.99009e-05	3.82672	0.962536
discordant genes:97	Neuromuscular Junction Development (GO)	7.89972e-05	19.9116	1
discordant genes:97	Receptor Type Tyrosine Protein Phosphatases (Re)	0.000111609	38.1816	1
Concordant Upregulated genes:104	Transmembrane Receptor Protein Serine Threonine Kinase Signaling Pathway (GO)	0.000115444	6.01096	1
Concordant Upregulated genes:104	Response to Acid Chemical (GO)	0.000122946	5.95394	1
Concordant Upregulated genes:104	Phagocytosis (GO)	0.000145057	6.78295	1
discordant genes:97	Cell Morphogenesis Involved in Differentiation (GO)	0.000147019	3.97062	1
Concordant Upregulated genes:104	Neg. Reg. of Cell Population Proliferation (GO)	0.000178635	4.17189	1
Concordant Upregulated genes:104	Response to Lipid (GO)	0.00018712	3.65558	1
discordant genes:97	Reg. of B-Cell Receptor Signaling Pathway (GO)	0.000249355	28.239	1
concordant Downregulated genes:28	Axon Guidance (Re)	0.000261475	17.8241	1
Concordant Upregulated genes:104	SMAD Protein Signal Transduction (GO)	0.000269832	14.176	1
discordant genes:97	Axon Guidance (Re)	0.000283878	4.24658	1
Concordant Upregulated genes:104	Ameboidal Type Cell Migration (GO)	0.000298638	5.19584	1
concordant Downregulated genes:28	Voltage Gated Potassium Channels (Re)	0.000314068	95.1321	1
Concordant Upregulated genes:104	Response to Steroid Hormone (GO)	0.00032628	5.12481	1
Concordant Upregulated genes:104	Toll Like Receptor Signaling Pathway (GO)	0.000355554	9.01548	1
Concordant Upregulated genes:104	Reg. of Defense Response (GO)	0.000360142	3.82724	1
Concordant Upregulated genes:104	Astrocyte Differentiation (GO)	0.000371654	12.968	1
discordant genes:97	RHO Protein Signal Transduction (GO)	0.000371908	6.9256	1
discordant genes:97	Adherens Junction (KG)	0.000383019	12.8631	1
discordant genes:97	Membrane Organization (GO)	0.000404113	3.53173	1
discordant genes:97	Interaction Between L1 and Ankyrins (Re)	0.000423767	23.1721	1
Concordant Upregulated genes:104	Matrisome Associated (Na)	0.000424361	3.7487	1
discordant genes:97	Rac Protein Signal Transduction (GO)	0.000466004	22.3779	1
Concordant Upregulated genes:104	Activation of Innate Immune Response (GO)	0.000471624	5.54169	1
discordant genes:97	Syndecan 2 Pathway (PI)	0.000510851	21.6373	1
concordant Downregulated genes:28	Neg. Reg. of Actin Filament Polymerization (GO)	0.000514388	73.4052	1
concordant Downregulated genes:28	Neuron Projection Guidance (GO)	0.000526664	24.4712	1
Concordant Upregulated genes:104	Neg. Reg. of Endothelial Cell Proliferation (GO)	0.000573749	20.6955	1
Concordant Upregulated genes:104	Reg. of Endothelial Cell Migration (GO)	0.000613801	7.95835	1
discordant genes:97	Reg. of Cell Shape (GO)	0.000618793	7.93725	1
Concordant Upregulated genes:104	Pathways in Cancer (KG)	0.000650007	5.23742	1
Concordant Upregulated genes:104	Response to Oxidative Stress (GO)	0.000671895	4.57212	1
concordant Downregulated genes:28	NCAM Signaling For Neurite Out Growth (Re)	0.000674662	63.9027	1
discordant genes:97	Membrane Depolarization (GO)	0.000687967	10.9312	1
discordant genes:97	Supramolecular Fiber Organization (GO)	0.000731292	3.7396	1
Concordant Upregulated genes:104	Pos. Reg. of Response to DNA Damage Stimulus (GO)	0.000773698	10.5797	1
Concordant Upregulated genes:104	Response to BMP (GO)	0.000775166	7.54198	1
discordant genes:97	Actin Crosslink Formation (GO)	0.000787477	61.0759	1
discordant genes:97	Reg. of RAS Protein Signal Transduction (GO)	0.000833749	5.90415	1
Concordant Upregulated genes:104	Lung Alveolus Development (GO)	0.000842774	17.97	1
discordant genes:97	Cell Projection Assembly (GO)	0.000849621	3.97508	1
Concordant Upregulated genes:104	Membrane Raft Assembly (GO)	0.000890614	56.1545	1
Concordant Upregulated genes:104	Neg. Reg. of MAPK Cascade (GO)	0.000890941	7.30326	1
Concordant Upregulated genes:104	Response to Corticosteroid (GO)	0.000915562	7.25732	1
discordant genes:97	Synaptic Growth AT Neuromuscular Junction (GO)	0.000981307	53.415	1
Concordant Upregulated genes:104	Transmembrane Receptor Protein Tyrosine Kinase Signaling Pathway (GO)	0.00105999	3.56105	1
Concordant Upregulated genes:104	Reg. of Gene Expression By Hypoxia Inducible Factor (Re)	0.00108533	49.9412	1
discordant genes:97	Vesicle Mediated Transport (Re)	0.00121381	3.48524	1
concordant Downregulated genes:28	Golgi Vesicle Transport (GO)	0.00121732	18.2049	1
discordant genes:97	Actin Cytoskeleton Reorganization (GO)	0.00122472	9.29675	1
Concordant Upregulated genes:104	Signaling By Receptor Tyrosine Kinases (Re)	0.00125049	4.13484	1
Concordant Upregulated genes:104	TP53 Regulates Transcription of Death Receptors and Ligands (Re)	0.00129857	44.982	1
Concordant Upregulated genes:104	Pos. Reg. of Reactive Oxygen Species Biosynthetic Process (GO)	0.00141919	14.8424	1
discordant genes:97	Pos. Reg. of Membrane Depolarization (GO)	0.00143038	42.7664	1
Concordant Upregulated genes:104	Muscle Adaptation (GO)	0.00151446	8.75636	1
Concordant Upregulated genes:104	Response to Oxygen Levels (GO)	0.0016181	4.44724	1
concordant Downregulated genes:28	Potassium Channels (Re)	0.00162251	40.5174	1
Concordant Upregulated genes:104	Muscle Structure Development (GO)	0.00162799	3.61186	1
Concordant Upregulated genes:104	Response to Interleukin 1 (GO)	0.00167265	6.30141	1
concordant Downregulated genes:28	COPI Mediated Anterograde Transport (Re)	0.00168861	39.7194	1
discordant genes:97	Reg. of Cell Morphogenesis (GO)	0.00176235	3.89905	1
Concordant Upregulated genes:104	Pos. Reg. of Macrophage Differentiation (GO)	0.00177996	37.4735	1
Concordant Upregulated genes:104	Response to dsRNA (GO)	0.0017812	13.6559	1
Concordant Upregulated genes:104	Neg. Reg. of Transmembrane Receptor Protein Serine Threonine Kinase Signaling Pathway (GO)	0.00184386	8.27965	1
Concordant Upregulated genes:104	Neg. Reg. of Vasculature Development (GO)	0.00190322	8.20768	1
Concordant Upregulated genes:104	Response to Ketone (GO)	0.00191803	6.10039	1
discordant genes:97	AR Tf Pathway (PI)	0.00193903	13.2355	1
discordant genes:97	Apoptotic Execution Phase (Re)	0.00193903	13.2355	1
concordant Downregulated genes:28	Reg. of Protein Complex Disassembly (GO)	0.00196571	36.7363	1
discordant genes:97	NFAT 3pathway (PI)	0.00204837	12.9714	1
Concordant Upregulated genes:104	Skeletal System Development (GO)	0.00209467	3.79548	1
Concordant Upregulated genes:104	Exocytosis (GO)	0.0021538	3.03247	1
Concordant Upregulated genes:104	Leukocyte Mediated Immunity (GO)	0.0021983	3.20999	1
discordant genes:97	Neuron Cell Cell Adhesion (GO)	0.00225461	32.9033	1
Concordant Upregulated genes:104	Response to Wounding (GO)	0.00226278	3.43282	1
discordant genes:97	B-Cell Receptor Signaling Pathway (GO)	0.00227838	12.4746	1
Concordant Upregulated genes:104	Phagocytosis Recognition (GO)	0.00233346	32.1268	1
discordant genes:97	Immune Response Regulating Cell Surface Receptor Signaling Pathway (GO)	0.00234366	4.14689	1
Concordant Upregulated genes:104	NOD Like Receptor Signaling Pathway (KG)	0.00254349	11.9711	1
Concordant Upregulated genes:104	Signal Transduction By Protein Phosphorylation (GO)	0.00258272	2.95792	1
Concordant Upregulated genes:104	Extracellular Structure Organization (GO)	0.00259308	4.07636	1
discordant genes:97	Reg. of Cellular Localization (GO)	0.00262642	2.94315	1
Concordant Upregulated genes:104	Renal Filtration (GO)	0.00263684	29.9898	1
concordant Downregulated genes:28	Neg. Reg. of Protein Complex Assembly (GO)	0.00270448	31.1184	1
Concordant Upregulated genes:104	Multi Multicellular Organism Process (GO)	0.00286987	5.5406	1
Concordant Upregulated genes:104	Response to Nutrient (GO)	0.00286987	5.5406	1
concordant Downregulated genes:28	Reg. of Anatomical Structure Size (GO)	0.00288088	13.3496	1
discordant genes:97	Pdzs Pathway (Bi)	0.0029023	28.5265	1
concordant Downregulated genes:28	Aminoglycan Metabolic Process (GO)	0.00291754	29.9172	1
discordant genes:97	Reg. of Antigen Receptor Mediated Signaling Pathway (GO)	0.00292159	11.3777	1
Concordant Upregulated genes:104	Pathway Restricted SMAD Protein Phosphorylation (GO)	0.00292306	11.371	1
Concordant Upregulated genes:104	Nonribosomal Peptide Biosynthetic Process (GO)	0.00295775	28.1211	1
Concordant Upregulated genes:104	Pulmonary Valve Development (GO)	0.00295775	28.1211	1
discordant genes:97	Synapse Organization (GO)	0.0029827	3.96412	1
Concordant Upregulated genes:104	Reg. of Toll Like Receptor Signaling Pathway (GO)	0.00305689	11.184	1
concordant Downregulated genes:28	Neg. Reg. of Cytoskeleton Organization (GO)	0.00309352	29.0206	1
concordant Downregulated genes:28	Monovalent Inorganic Cation Transport (GO)	0.00312313	12.9628	1
Concordant Upregulated genes:104	Cellular Response to External Stimulus (GO)	0.00319808	4.48699	1
Concordant Upregulated genes:104	Toll Like Receptor 3 Signaling Pathway (GO)	0.00329604	26.4723	1
Concordant Upregulated genes:104	Reg. of Double Strand Break Repair Via Nonhomologous End Joining (GO)	0.00329604	26.4723	1
discordant genes:97	Protein Localization to Cell Periphery (GO)	0.00332428	4.44428	1
Concordant Upregulated genes:104	Cellular Response to Nutrient (GO)	0.00333573	10.8293	1
Concordant Upregulated genes:104	Import Into Cell (GO)	0.00340164	3.21904	1
concordant Downregulated genes:28	Adult Behavior (GO)	0.00341328	27.5436	1
Concordant Upregulated genes:104	Response to Carbohydrate (GO)	0.00342353	5.30856	1
Concordant Upregulated genes:104	Endothelial Cell Proliferation (GO)	0.00347531	6.90138	1
discordant genes:97	Reg. of Postsynaptic Membrane Neurotransmitter Receptor Levels (GO)	0.00350898	10.631	1
Concordant Upregulated genes:104	Response to Nitrogen Compound (GO)	0.00353448	2.83152	1
Concordant Upregulated genes:104	Muscle System Process (GO)	0.00354889	3.84259	1
Concordant Upregulated genes:104	P53 Downstream Pathway (PI)	0.0035669	6.84972	1
discordant genes:97	Response to Magnesium Ion (GO)	0.00362677	25.1785	1
Concordant Upregulated genes:104	Neg. Reg. of ERK1 and ERK2 Cascade (GO)	0.00362969	10.4949	1
concordant Downregulated genes:28	Multicellular Organism Growth (GO)	0.00365081	26.5958	1
discordant genes:97	Reg. of Membrane Potential (GO)	0.00369915	3.80605	1
Concordant Upregulated genes:104	Reg. of Immune Response (GO)	0.00373729	2.80935	1
Concordant Upregulated genes:104	Neg. Reg. of Cell Death (GO)	0.00376701	2.80621	1
discordant genes:97	Integrin1 Pathway (PI)	0.00382778	10.2888	1
discordant genes:97	Viral Life Cycle (GO)	0.00383225	4.31216	1
discordant genes:97	Signaling By RHO Gtpases (Re)	0.00384695	3.77779	1
Concordant Upregulated genes:104	Response to Hormone (GO)	0.00391849	2.7906	1
Concordant Upregulated genes:104	Membrane Raft Organization (GO)	0.0040241	23.6888	1
Concordant Upregulated genes:104	Cell Aggregation (GO)	0.0040241	23.6888	1
discordant genes:97	Multi Organism Behavior (GO)	0.00416371	9.97288	1
Concordant Upregulated genes:104	Embryo Development (GO)	0.00417103	2.76597	1
Concordant Upregulated genes:104	in Utero Embryonic Development (GO)	0.0043069	4.21167	1
Concordant Upregulated genes:104	Reg. of System Process (GO)	0.00431923	3.352	1
Concordant Upregulated genes:104	Reg. of SMAD Protein Signal Transduction (GO)	0.00441355	22.4919	1
discordant genes:97	RAC1 Pathway (Bi)	0.00442657	22.5032	1
discordant genes:97	Signal Transduction By L1 (Re)	0.00442657	22.5032	1
discordant genes:97	Basement Membrane Organization (GO)	0.00442657	22.5032	1
Concordant Upregulated genes:104	Vasculogenesis (GO)	0.00443229	9.74158	1
Concordant Upregulated genes:104	Cellular Response to Mechanical Stimulus (GO)	0.00460465	9.60404	1
discordant genes:97	CDC42 Pathway (PI)	0.0047003	9.53125	1
discordant genes:97	Small GTPase Mediated Signal Transduction (GO)	0.00470681	3.29543	1
discordant genes:97	Adult Behavior (GO)	0.00481933	6.2708	1
Concordant Upregulated genes:104	Pos. Reg. of Toll Like Receptor Signaling Pathway (GO)	0.00481975	21.4156	1
Concordant Upregulated genes:104	Atrioventricular Valve Development (GO)	0.00481975	21.4156	1
Concordant Upregulated genes:104	Renal System Process Involved in Reg. of Systemic Arterial Blood Pressure (GO)	0.00481975	21.4156	1
discordant genes:97	Response to Auditory Stimulus (GO)	0.00485425	21.3866	1
Concordant Upregulated genes:104	ECM Proteoglycans (Re)	0.00496144	9.3425	1
discordant genes:97	Localization Within Membrane (GO)	0.00518537	6.13731	1
Concordant Upregulated genes:104	Neg. Reg. of Sprouting Angiogenesis (GO)	0.00524253	20.437	1
Concordant Upregulated genes:104	Interleukin 6 Family Signaling (Re)	0.00524253	20.437	1
discordant genes:97	Neg. Reg. of Transporter Activity (GO)	0.00527688	9.12888	1
Concordant Upregulated genes:104	Extra Nuclear Estrogen Signaling (Re)	0.00533448	9.09088	1
discordant genes:97	Transmembrane Receptor Protein Tyrosine Kinase Signaling Pathway (GO)	0.00533878	2.98606	1
Concordant Upregulated genes:104	Tissue Remodeling (GO)	0.00538427	6.07356	1
discordant genes:97	WNT Signaling Pathway (KG)	0.00556963	6.00934	1
concordant Downregulated genes:28	Taxis (GO)	0.00562444	10.4342	1
Concordant Upregulated genes:104	Reactive Oxygen Species Metabolic Process (GO)	0.0057588	5.95426	1
discordant genes:97	WNT Pathway (Bi)	0.00576428	19.4469	1
discordant genes:97	Synaptic Signaling (GO)	0.00580169	2.94544	1
Concordant Upregulated genes:104	Innate Immune Response (GO)	0.005832	2.77392	1
Concordant Upregulated genes:104	Hemostasis (Re)	0.00619674	3.14424	1
concordant Downregulated genes:28	Cytoskeletal Anchoring AT Plasma Membrane (GO)	0.00621256	193.459	1
concordant Downregulated genes:28	Pos. Reg. of Mitochondrial Calcium Ion Concentration (GO)	0.00621256	193.459	1
discordant genes:97	Excitatory Synapse Assembly (GO)	0.00624628	18.5986	1
discordant genes:97	Lamellipodium Organization (GO)	0.00655313	8.41206	1
Concordant Upregulated genes:104	Pos. Reg. of Double Strand Break Repair (GO)	0.00660886	17.9892	1
concordant Downregulated genes:28	Reg. of Ion Transport (GO)	0.00661883	9.81973	1
Concordant Upregulated genes:104	Reg. of Cellular Response to Growth Factor Stimulus (GO)	0.00662825	4.51098	1
Concordant Upregulated genes:104	Ossification (GO)	0.00664055	3.83464	1
Concordant Upregulated genes:104	Pos. Reg. of Cell Population Proliferation (GO)	0.00670823	2.71421	1
discordant genes:97	Effects of PIP2 Hydrolysis (Re)	0.00674602	17.8266	1
discordant genes:97	Postsynapse Organization (GO)	0.00683555	5.65535	1
discordant genes:97	Hematopoietic Progenitor Cell Differentiation (GO)	0.00698699	5.61856	1
discordant genes:97	Reg. of TP53 Activity (Re)	0.00698699	5.61856	1
Concordant Upregulated genes:104	Apoptosis (KG)	0.00699312	8.21021	1
discordant genes:97	Reg. of Actin Filament Organization (GO)	0.00703066	4.43986	1
Concordant Upregulated genes:104	TRAIL Pathway (PI)	0.00709644	17.2971	1
Concordant Upregulated genes:104	Secondary Metabolite Biosynthetic Process (GO)	0.00709644	17.2971	1
Concordant Upregulated genes:104	Neg. Reg. of Muscle Hypertrophy (GO)	0.00709644	17.2971	1
Concordant Upregulated genes:104	Supramolecular Fiber Organization (GO)	0.0071411	3.06486	1
concordant Downregulated genes:28	Cellular Protein Complex Disassembly (GO)	0.00741197	18.3517	1
concordant Downregulated genes:28	Neuronal Ion Channel Clustering (GO)	0.00745086	159.167	1
concordant Downregulated genes:28	Membrane Hyperpolarization (GO)	0.00745086	159.167	1
concordant Downregulated genes:28	Lateral Ventricle Development (GO)	0.00745086	159.167	1
concordant Downregulated genes:28	Neg. Reg. of Heart Rate (GO)	0.00745086	159.167	1
Concordant Upregulated genes:104	Gliogenesis (GO)	0.00750497	4.3722	1
Concordant Upregulated genes:104	Plasma Membrane Organization (GO)	0.00768535	7.92295	1
discordant genes:97	Death Pathway (Bi)	0.00779805	16.4512	1
discordant genes:97	LIS1 Pathway (PI)	0.00779805	16.4512	1
discordant genes:97	Pos. Reg. of Lamellipodium Organization (GO)	0.00779805	16.4512	1
concordant Downregulated genes:28	Antigen Processing and Presentation (GO)	0.00788954	17.7559	1
Concordant Upregulated genes:104	Reg. of Multi Organism Process (GO)	0.00790794	3.68987	1
Concordant Upregulated genes:104	Response to Vitamin (GO)	0.00792477	7.83149	1
discordant genes:97	Protein Localization to Membrane (GO)	0.00796763	2.99877	1
concordant Downregulated genes:28	Reg. of Retrograde Protein Transport ER to Cytosol (GO)	0.00806948	145.811	1
concordant Downregulated genes:28	Cerebellar Purkinje Cell Layer Morphogenesis (GO)	0.00806948	145.811	1
concordant Downregulated genes:28	Pos. Reg. of Protein Exit From Endoplasmic Reticulum (GO)	0.00806948	145.811	1
Concordant Upregulated genes:104	IL1R Pathway (Bi)	0.00811894	16.0617	1
Concordant Upregulated genes:104	Myeloid Leukocyte Cytokine Production (GO)	0.00811894	16.0617	1
Concordant Upregulated genes:104	Vascular Endothelial Growth Factor Receptor Signaling Pathway (GO)	0.00816856	7.74212	1
discordant genes:97	Myogenesis (Re)	0.00834999	15.8417	1
concordant Downregulated genes:28	Potassium Ion Transport (GO)	0.00838082	17.1974	1
discordant genes:97	Reg. of Cell Projection Assembly (GO)	0.00862495	5.27583	1
Concordant Upregulated genes:104	Amino Acid Transport Across The Plasma Membrane (Re)	0.00865354	15.5077	1
Concordant Upregulated genes:104	Superoxide Anion Generation (GO)	0.00865354	15.5077	1
Concordant Upregulated genes:104	Reg. of Superoxide Metabolic Process (GO)	0.00865354	15.5077	1
Concordant Upregulated genes:104	Transcriptional Reg. of Pluripotent Stem Cells (Re)	0.00865354	15.5077	1
Concordant Upregulated genes:104	Cellular Response to Ketone (GO)	0.00866931	7.5694	1
Concordant Upregulated genes:104	Antibiotic Metabolic Process (GO)	0.00866931	7.5694	1
concordant Downregulated genes:28	Racc Pathway (Bi)	0.00868775	134.63	1
concordant Downregulated genes:28	Cell Morphogenesis Involved in Differentiation (GO)	0.00871044	8.85374	1
discordant genes:97	Plasma Membrane Organization (GO)	0.00878559	7.53032	1
Concordant Upregulated genes:104	Reg. of Cellular Component Movement (GO)	0.00883085	2.59872	1
discordant genes:97	CDC42 Reg Pathway (PI)	0.00891899	15.276	1
discordant genes:97	Dendrite Extension (GO)	0.00891899	15.276	1
discordant genes:97	Reg. of Protein Stability (GO)	0.00904128	4.16582	1
discordant genes:97	Dilated Cardiomyopathy (KG)	0.00905779	7.44348	1
Concordant Upregulated genes:104	Reg. of Renal System Process (GO)	0.00920353	14.991	1
concordant Downregulated genes:28	Glycosaminoglycan Biosynthesis Keratan Sulfate (KG)	0.00930567	125.289	1
Concordant Upregulated genes:104	ERK1 and ERK2 Cascade (GO)	0.00936176	4.13384	1
discordant genes:97	Vesicle Mediated Transport to The Plasma Membrane (GO)	0.00961693	7.27573	1
discordant genes:97	Synapse Assembly (GO)	0.00971901	5.08899	1
Concordant Upregulated genes:104	Pos. Reg. of Synaptic Transmission Glutamatergic (GO)	0.00976874	14.508	1
Concordant Upregulated genes:104	Response to Mineralocorticoid (GO)	0.00976874	14.508	1
Concordant Upregulated genes:104	Circulatory System Process (GO)	0.00985358	3.14573	1
discordant genes:97	Osteoclast Differentiation (GO)	0.0099039	7.19468	1
Concordant Upregulated genes:104	Myotube Differentiation (GO)	0.0099988	7.16979	1
concordant Downregulated genes:28	Pos. Reg. of Growth (GO)	0.0100128	15.6492	1
discordant genes:97	Rhythmic Process (GO)	0.0100346	4.0563	1
discordant genes:97	Neg. Reg. of Potassium Ion Transport (GO)	0.0101075	14.2588	1
discordant genes:97	Cellular Responses to External Stimuli (Re)	0.0102211	3.11736	1
concordant Downregulated genes:28	Reg. of Actin Filament Organization (GO)	0.0102456	15.4593	1
Concordant Upregulated genes:104	Membrane Biogenesis (GO)	0.010349	14.0554	1
discordant genes:97	Reg. of Cytoskeleton Organization (GO)	0.0106431	3.0918	1
Concordant Upregulated genes:104	Anatomical Structure Homeostasis (GO)	0.0107117	3.44689	1
discordant genes:97	Pos. Reg. of Synaptic Transmission Glutamatergic (GO)	0.0107266	13.7999	1
Concordant Upregulated genes:104	Leukocyte Migration (GO)	0.010832	3.43818	1
discordant genes:97	Cell Junction Organization (GO)	0.0109439	3.96678	1
Concordant Upregulated genes:104	Neg. Reg. of Intracellular Steroid Hormone Receptor Signaling Pathway (GO)	0.0109443	13.6306	1
Concordant Upregulated genes:104	Pos. Reg. of Intracellular Signal Transduction (GO)	0.0109806	2.50906	1
discordant genes:97	Reg. of Potassium Ion Transport (GO)	0.0111015	6.88509	1
Concordant Upregulated genes:104	Reactive Oxygen Species Biosynthetic Process (GO)	0.0111432	6.87665	1
concordant Downregulated genes:28	Protein Polymerization (GO)	0.0112009	14.7431	1
discordant genes:97	Membrane Biogenesis (GO)	0.0113621	13.359	1
Concordant Upregulated genes:104	Neg. Reg. of Production of Molecular Mediator of Immune Response (GO)	0.0115543	13.2201	1
Concordant Upregulated genes:104	Reg. of Defense Response to Virus By Host (GO)	0.0115543	13.2201	1
Concordant Upregulated genes:104	Embryonic Organ Development (GO)	0.0115739	3.3868	1
discordant genes:97	Reg. of Cell Projection Organization (GO)	0.0116618	2.79447	1
Concordant Upregulated genes:104	Reg. of Cellular Response to Stress (GO)	0.0117525	2.79552	1
discordant genes:97	Postsynaptic Specialization Organization (GO)	0.0120138	12.9556	1
Concordant Upregulated genes:104	Glial Cell Development (GO)	0.0120492	6.67421	1
discordant genes:97	COPI Mediated Anterograde Transport (Re)	0.0120523	6.67202	1
Concordant Upregulated genes:104	ALK Pathway (Bi)	0.012179	12.8437	1
discordant genes:97	CXCR4 Pathway (PI)	0.0123793	6.60378	1
concordant Downregulated genes:28	Mucopolysaccharide Metabolic Process (GO)	0.01239	92.3171	1
concordant Downregulated genes:28	Defective B4GALT7 Causes EDS Progeroid Type (Re)	0.01239	92.3171	1
discordant genes:97	Cognition (GO)	0.0124113	3.83961	1
Concordant Upregulated genes:104	Focal Adhesion (KG)	0.0127148	4.69152	1
Concordant Upregulated genes:104	Reg. of Response to DNA Damage Stimulus (GO)	0.0127148	4.69152	1
Concordant Upregulated genes:104	Reg. of Vasculature Development (GO)	0.0129565	3.8011	1
Concordant Upregulated genes:104	Transport of Inorganic Cations Anions and Amino Acids Oligopeptides (Re)	0.0129965	6.48262	1
Concordant Upregulated genes:104	Response to Amino Acid (GO)	0.0129965	6.48262	1
concordant Downregulated genes:28	Signal Transduction By L1 (Re)	0.0130058	87.6173	1
concordant Downregulated genes:28	Left Right Pattern Formation (GO)	0.0130058	87.6173	1
concordant Downregulated genes:28	Endoplasmic Reticulum Calcium Ion Homeostasis (GO)	0.0130058	87.6173	1
concordant Downregulated genes:28	Neurotransmitter Receptor Localization to Postsynaptic Specialization Membrane (GO)	0.0130058	87.6173	1
discordant genes:97	Growth (GO)	0.0134493	2.42148	1
Concordant Upregulated genes:104	Blood Vessel Remodeling (GO)	0.0134717	12.1507	1
discordant genes:97	Endomembrane System Organization (GO)	0.0135691	3.26111	1
concordant Downregulated genes:28	Hs GAG Degradation (Re)	0.0136213	83.6903	1
concordant Downregulated genes:28	Calcium Mediated Signaling Using Intracellular Calcium Source (GO)	0.0136213	83.6903	1
concordant Downregulated genes:28	Pos. Reg. of cAMP Mediated Signaling (GO)	0.0136213	83.6903	1
Concordant Upregulated genes:104	Neg. Reg. of Protein Modification Process (GO)	0.0136684	2.94135	1
Concordant Upregulated genes:104	Cytokine Signaling in Immune System (Re)	0.0137036	2.54832	1
concordant Downregulated genes:28	Metabolism of Carbohydrates (Re)	0.0138449	13.1598	1
concordant Downregulated genes:28	MAPK Family Signaling Cascades (Re)	0.0138449	13.1598	1
discordant genes:97	Cell Cell Adhesion (GO)	0.0139185	2.5362	1
concordant Downregulated genes:28	Metal Ion Transport (GO)	0.0139305	7.39213	1
Concordant Upregulated genes:104	Viral Life Cycle (GO)	0.0139833	3.72612	1
discordant genes:97	Mitotic Prometaphase (Re)	0.0140052	4.55079	1
discordant genes:97	Muscle Filament Sliding (GO)	0.0140646	11.8772	1
discordant genes:97	Integration of Energy Metabolism (Re)	0.0140907	6.28147	1
Concordant Upregulated genes:104	Basement Membranes (Na)	0.0141395	11.8304	1
Concordant Upregulated genes:104	Neg. Reg. of Interleukin 6 Production (GO)	0.0141395	11.8304	1
Concordant Upregulated genes:104	Macrophage Differentiation (GO)	0.0141395	11.8304	1
discordant genes:97	Reg. of Protein Complex Assembly (GO)	0.0141735	3.22847	1
discordant genes:97	Signaling By WNT (Re)	0.0141926	3.7075	1
concordant Downregulated genes:28	Mitochondrial Calcium Ion Homeostasis (GO)	0.0142364	79.832	1
Concordant Upregulated genes:104	Interaction With Host (GO)	0.0145068	4.50491	1
concordant Downregulated genes:28	Asparagine N Linked Glycosylation (Re)	0.0145676	12.8051	1
discordant genes:97	Multicellular Organismal Signaling (GO)	0.0147365	4.47947	1
concordant Downregulated genes:28	Protein Localization to Cell Periphery (GO)	0.0147509	12.7193	1
discordant genes:97	Postsynaptic Membrane Organization (GO)	0.0147796	11.5557	1
discordant genes:97	Response to Amyloid Beta (GO)	0.0147796	11.5557	1
Concordant Upregulated genes:104	Interleukin 10 Signaling (Re)	0.0148214	11.5266	1
concordant Downregulated genes:28	Epithelial Cilium Movement (GO)	0.0148512	76.3542	1
concordant Downregulated genes:28	Amino Sugar Metabolic Process (GO)	0.0148512	76.3542	1
Concordant Upregulated genes:104	Bone Development (GO)	0.0149785	4.46038	1
discordant genes:97	Reg. of Immune Response (GO)	0.0149877	2.37805	1
discordant genes:97	Response to Mechanical Stimulus (GO)	0.0152373	4.43319	1
Concordant Upregulated genes:104	Actin Filament Based Process (GO)	0.0152716	2.6595	1
discordant genes:97	Reg. of Protein Localization (GO)	0.0153922	2.36777	1
concordant Downregulated genes:28	Reg. of Developmental Growth (GO)	0.0154002	12.4201	1
concordant Downregulated genes:28	Basigin Interactions (Re)	0.0154656	73.084	1
concordant Downregulated genes:28	Reg. of Protein Localization to Synapse (GO)	0.0154656	73.084	1
concordant Downregulated genes:28	Antigen Presentation: Folding Assembly and Peptide Loading of Class I MHC (Re)	0.0154656	73.084	1
discordant genes:97	Smooth Muscle Contraction (Re)	0.0155099	11.2512	1
discordant genes:97	Basement Membranes (Na)	0.0155099	11.2512	1
discordant genes:97	Pos. Reg. of B-Cell Proliferation (GO)	0.0155099	11.2512	1
discordant genes:97	Modulation of Excitatory Postsynaptic Potential (GO)	0.0155099	11.2512	1
Concordant Upregulated genes:104	Response to Dexamethasone (GO)	0.0155173	11.238	1
Concordant Upregulated genes:104	Collagen Biosynthetic Process (GO)	0.0155173	11.238	1
Concordant Upregulated genes:104	Binding and Uptake of Ligands By Scavenger Receptors (Re)	0.0155173	11.238	1
Concordant Upregulated genes:104	Chondrocyte Differentiation (GO)	0.0157261	6.02103	1
Concordant Upregulated genes:104	Apoptotic Cell Clearance (GO)	0.0162269	10.9649	1
Concordant Upregulated genes:104	Macrophage Migration (GO)	0.0162269	10.9649	1
Concordant Upregulated genes:104	Pos. Reg. of Hydrolase Activity (GO)	0.0163523	2.62463	1
Concordant Upregulated genes:104	Reg. of MAP Kinase Activity (GO)	0.0163934	3.57258	1
concordant Downregulated genes:28	Ventricular System Development (GO)	0.0166934	67.4857	1
Concordant Upregulated genes:104	Cell Substrate Adhesion (GO)	0.0167873	3.55019	1
Concordant Upregulated genes:104	Neg. Reg. of Epithelial Cell Proliferation (GO)	0.0168266	5.86436	1
Concordant Upregulated genes:104	TP53 Regulates Transcription of Cell Death Genes (Re)	0.0169503	10.7034	1
discordant genes:97	ERBB1 Internalization Pathway (PI)	0.0170162	10.6891	1
discordant genes:97	Interaction With Host (GO)	0.0170742	4.27856	1
discordant genes:97	Muscle Contraction (Re)	0.0173474	4.25729	1
Concordant Upregulated genes:104	Secreted Factors (Na)	0.0173898	3.51713	1
Concordant Upregulated genes:104	Neg. Reg. of Protein Catabolic Process (GO)	0.0175837	5.76434	1
Concordant Upregulated genes:104	Pos. Reg. of Reactive Oxygen Species Metabolic Process (GO)	0.0176871	10.4537	1
Concordant Upregulated genes:104	PRI miRNA Transcription By RNA Polymerase II (GO)	0.0176871	10.4537	1
concordant Downregulated genes:28	Reg. of ERAD Pathway (GO)	0.0179199	62.7438	1
concordant Downregulated genes:28	Growth (GO)	0.0179295	6.69424	1
concordant Downregulated genes:28	Multi Organism Reproductive Process (GO)	0.0179295	6.69424	1
Concordant Upregulated genes:104	Reg. of DNA Templated Transcription in Response to Stress (GO)	0.0183597	5.66766	1
Concordant Upregulated genes:104	A6b1 A6b4 Integrin Pathway (PI)	0.0184374	10.2125	1
Concordant Upregulated genes:104	Coronary Vasculature Development (GO)	0.0184374	10.2125	1
concordant Downregulated genes:28	Walking Behavior (GO)	0.0185325	60.5868	1
discordant genes:97	Dendrite Development (GO)	0.0187546	4.15431	1
concordant Downregulated genes:28	Central Nervous System Development (GO)	0.0187584	6.57564	1
Concordant Upregulated genes:104	Multicellular Organismal Homeostasis (GO)	0.0190299	3.01744	1
Concordant Upregulated genes:104	Exocrine System Development (GO)	0.019201	9.98631	1
discordant genes:97	Ps1 Pathway (PI)	0.0193871	9.94011	1
discordant genes:97	Neg. Reg. of Protein Kinase B Signaling (GO)	0.0193871	9.94011	1
Concordant Upregulated genes:104	Response to Estradiol (GO)	0.0199681	5.48436	1
Concordant Upregulated genes:104	Platelet Degranulation (GO)	0.0199681	5.48436	1
discordant genes:97	MHC Class II Antigen Presentation (Re)	0.0199965	5.47925	1
Concordant Upregulated genes:104	Neg. Reg. of Developmental Process (GO)	0.0201484	2.37697	1
discordant genes:97	BCR Signaling Pathway (SG)	0.0202065	9.71418	1
Concordant Upregulated genes:104	Signaling By NOTCH3 (Re)	0.0207674	9.56123	1
Concordant Upregulated genes:104	Neg. Reg. of BMP Signaling Pathway (GO)	0.0207674	9.56123	1
concordant Downregulated genes:28	Keratan Sulfate Keratin Metabolism (Re)	0.0209798	53.2715	1
concordant Downregulated genes:28	Neg. Reg. of Blood Circulation (GO)	0.0209798	53.2715	1
concordant Downregulated genes:28	Pos. Reg. of Multicellular Organism Growth (GO)	0.0209798	53.2715	1
discordant genes:97	Rhoa Reg Pathway (PI)	0.0210403	9.49685	1
discordant genes:97	Hedgehog Gli Pathway (PI)	0.0210403	9.49685	1
discordant genes:97	Neuron Recognition (GO)	0.0210403	9.49685	1
discordant genes:97	Neuron Maturation (GO)	0.0210403	9.49685	1
discordant genes:97	Signal Release (GO)	0.0210825	2.94077	1
Concordant Upregulated genes:104	Skeletal System Morphogenesis (GO)	0.0214056	3.98741	1
Concordant Upregulated genes:104	Cellular Response to Drug (GO)	0.0215419	3.32037	1
concordant Downregulated genes:28	Central Nervous System Neuron Axonogenesis (GO)	0.0215908	51.624	1
Concordant Upregulated genes:104	Reg. of Response to Biotic Stimulus (GO)	0.0216521	5.31186	1
discordant genes:97	Type II Diabetes Mellitus (KG)	0.0218882	9.29307	1
discordant genes:97	Cytoplasmic Microtubule Organization (GO)	0.0218882	9.29307	1
discordant genes:97	Behavior (GO)	0.0219995	2.6544	1
Concordant Upregulated genes:104	Natural Killer Cell Mediated Cytotoxicity (KG)	0.0220849	5.2704	1
Concordant Upregulated genes:104	Interleukin 6 Production (GO)	0.0225225	5.22958	1
discordant genes:97	Angiopoietin Receptor Pathway (PI)	0.0227501	9.09382	1
discordant genes:97	FOXO Pathway (PI)	0.0227501	9.09382	1
discordant genes:97	Signaling By NOTCH3 (Re)	0.0227501	9.09382	1
concordant Downregulated genes:28	Pos. Reg. of Response to Endoplasmic Reticulum Stress (GO)	0.0228116	48.7639	1
discordant genes:97	Potassium Ion Transport (GO)	0.0230651	3.89046	1
Concordant Upregulated genes:104	Syncytium Formation (GO)	0.0232134	8.98685	1
Concordant Upregulated genes:104	Cell Surface Interactions AT The Vascular Wall (Re)	0.0234117	5.14953	1
Concordant Upregulated genes:104	Death Receptor Signalling (Re)	0.0238634	5.11008	1
concordant Downregulated genes:28	Pos. Reg. of Axon Extension (GO)	0.0240311	46.2085	1
discordant genes:97	Pdgfrb Pathway (PI)	0.0241013	5.08784	1
Concordant Upregulated genes:104	Reg. of Viral Life Cycle (GO)	0.0243199	5.07194	1
Concordant Upregulated genes:104	Homeostasis of Number of Cells (GO)	0.0245138	3.81848	1
discordant genes:97	Caspase Pathway (PI)	0.0245153	8.72118	1
discordant genes:97	Tight Junction (KG)	0.0245834	5.04819	1
concordant Downregulated genes:28	Synapse Organization (GO)	0.0246994	9.60387	1
Concordant Upregulated genes:104	Pos. Reg. of Epithelial Cell Migration (GO)	0.0247811	5.0344	1
Concordant Upregulated genes:104	Tgfbr Pathway (PI)	0.0249067	8.63998	1
Concordant Upregulated genes:104	Heart Valve Development (GO)	0.0249067	8.63998	1
Concordant Upregulated genes:104	Protein K48 Linked Ubiquitination (GO)	0.0249067	8.63998	1
Concordant Upregulated genes:104	Signaling By Non Receptor Tyrosine Kinases (Re)	0.0249067	8.63998	1
concordant Downregulated genes:28	Neuronal System (Re)	0.0250453	9.53067	1
Concordant Upregulated genes:104	Epithelial Cell Proliferation (GO)	0.0252432	3.17964	1
Concordant Upregulated genes:104	RHO GTPase Cycle (Re)	0.025247	4.99581	1
concordant Downregulated genes:28	Diseases Associated With Glycosaminoglycan Metabolism (Re)	0.0252492	43.9183	1
discordant genes:97	Rmts Methylate Histone Arginines (Re)	0.0254184	8.5463	1
Concordant Upregulated genes:104	RAC1 Pathway (PI)	0.0257718	8.4764	1
Concordant Upregulated genes:104	Response to Gamma Radiation (GO)	0.0257718	8.4764	1
concordant Downregulated genes:28	Integrin3 Pathway (PI)	0.0258577	42.8438	1
discordant genes:97	Actin Filament Based Movement (GO)	0.0260612	4.93092	1
discordant genes:97	Pos. Reg. of Lipid Metabolic Process (GO)	0.0260612	4.93092	1
discordant genes:97	Chromatin Organization (Re)	0.0261303	3.73776	1
concordant Downregulated genes:28	Reg. of Protein Complex Assembly (GO)	0.0263309	9.27141	1
discordant genes:97	Inositol Phosphate Mediated Signaling (GO)	0.0263349	8.37716	1
concordant Downregulated genes:28	Protein Exit From Endoplasmic Reticulum (GO)	0.0264659	41.8875	1
concordant Downregulated genes:28	Reg. of Membrane Potential (GO)	0.0265676	9.22533	1
Concordant Upregulated genes:104	Pos. Reg. of Epithelial Cell Differentiation (GO)	0.026649	8.31875	1
Concordant Upregulated genes:104	Anion Homeostasis (GO)	0.026649	8.31875	1
discordant genes:97	Neg. Reg. of Cytoskeleton Organization (GO)	0.0270724	4.85645	1
discordant genes:97	Death Receptor Signalling (Re)	0.0270724	4.85645	1
discordant genes:97	Receptor Clustering (GO)	0.0272646	8.21652	1
Concordant Upregulated genes:104	Response to Extracellular Stimulus (GO)	0.0273884	2.76392	1
Concordant Upregulated genes:104	Reg. of Actin Filament Organization (GO)	0.0275339	3.67821	1
Concordant Upregulated genes:104	Signaling By ERBB4 (Re)	0.0275382	8.16671	1
Concordant Upregulated genes:104	Filopodium Assembly (GO)	0.0275382	8.16671	1
concordant Downregulated genes:28	Second Messenger Mediated Signaling (GO)	0.0278851	8.98151	1
discordant genes:97	Transcriptional Reg. By TP53 (Re)	0.0279562	3.08778	1
discordant genes:97	Neg. Reg. of Actin Filament Polymerization (GO)	0.0282075	8.06137	1
discordant genes:97	RHO GTPase Cycle (Re)	0.0286282	4.74868	1
Concordant Upregulated genes:104	Placenta Development (GO)	0.0286404	4.75003	1
Concordant Upregulated genes:104	Membrane Organization (GO)	0.0288922	2.34265	1
concordant Downregulated genes:28	Recycling Pathway of L1 (Re)	0.0288952	38.1989	1
concordant Downregulated genes:28	Neuron Maturation (GO)	0.0288952	38.1989	1
concordant Downregulated genes:28	Cerebellar Cortex Development (GO)	0.0288952	38.1989	1
Concordant Upregulated genes:104	Actin Filament Bundle Organization (GO)	0.0291441	4.7168	1
discordant genes:97	Establishment of Protein Localization to Plasma Membrane (GO)	0.0291634	7.91171	1
Concordant Upregulated genes:104	Reg. of Immune Effector Process (GO)	0.0293323	3.05015	1
discordant genes:97	Interspecies Interaction Between Organisms (GO)	0.0293668	2.21042	1
concordant Downregulated genes:28	Reg. of cAMP Mediated Signaling (GO)	0.0295016	37.3844	1
concordant Downregulated genes:28	Metabolism of Fat Soluble Vitamins (Re)	0.0295016	37.3844	1
Concordant Upregulated genes:104	Myeloid Cell Differentiation (GO)	0.029619	3.04188	1
discordant genes:97	Reg. of Protein Catabolic Process (GO)	0.0297379	3.03513	1
Concordant Upregulated genes:104	Platelet Activation Signaling and Aggregation (Re)	0.0300306	3.57527	1
discordant genes:97	Learning (GO)	0.0302307	4.64547	1
Concordant Upregulated genes:104	Protein Localization to Cell Surface (GO)	0.0302765	7.74393	1
concordant Downregulated genes:28	Chondroitin Sulfate Dermatan Sulfate Metabolism (Re)	0.0307135	35.8442	1
discordant genes:97	Pos. Reg. of Neurological System Process (GO)	0.0311135	7.6285	1
Concordant Upregulated genes:104	Glycolysis Gluconeogenesis (KG)	0.0312124	7.61237	1
discordant genes:97	Reg. of Lipid Metabolic Process (GO)	0.0312764	2.99258	1
Concordant Upregulated genes:104	Connective Tissue Development (GO)	0.0315157	3.51943	1
concordant Downregulated genes:28	Apoptotic Execution Phase (Re)	0.031924	34.4401	1
discordant genes:97	Fak Pathway (PI)	0.0321075	7.49442	1
discordant genes:97	Non Integrin Membrane ECM Interactions (Re)	0.0321075	7.49442	1
Concordant Upregulated genes:104	Response to Cadmium Ion (GO)	0.0321597	7.48524	1
Concordant Upregulated genes:104	Pos. Reg. of Actin Filament Bundle Assembly (GO)	0.0321597	7.48524	1
Concordant Upregulated genes:104	Biomineral Tissue Development (GO)	0.0322645	4.5271	1
discordant genes:97	Clathrin Mediated Endocytosis (Re)	0.0324398	4.51496	1
concordant Downregulated genes:28	Cilium Movement (GO)	0.0325288	33.8207	1
Concordant Upregulated genes:104	Neg. Reg. of DNA Binding Transcription Factor Activity (GO)	0.0328009	4.49675	1
Concordant Upregulated genes:104	Toll Like Receptor Cascades (Re)	0.0328009	4.49675	1
discordant genes:97	Actin Filament Bundle Organization (GO)	0.033005	4.48323	1
discordant genes:97	Formation of The Beta Catenin:TCF Transactivating Complex (Re)	0.0331139	7.36502	1
Concordant Upregulated genes:104	L Amino Acid Transport (GO)	0.0331183	7.36233	1
Concordant Upregulated genes:104	Cellular Response to Corticosteroid Stimulus (GO)	0.0331183	7.36233	1
Concordant Upregulated genes:104	Secondary Metabolic Process (GO)	0.0331183	7.36233	1
Concordant Upregulated genes:104	Cellular Response to Reactive Oxygen Species (GO)	0.033342	4.46682	1
Concordant Upregulated genes:104	Sensory Organ Development (GO)	0.0335293	2.62874	1
concordant Downregulated genes:28	Heparan Sulfate Heparin Hs GAG Metabolism (Re)	0.0337372	32.5333	1
Concordant Upregulated genes:104	Reg. of Cartilage Development (GO)	0.034088	7.24344	1
discordant genes:97	Trkr Pathway (PI)	0.0341326	7.24006	1
concordant Downregulated genes:28	Pos. Reg. of Intrinsic Apoptotic Signaling Pathway (GO)	0.0343409	31.9413	1
Concordant Upregulated genes:104	JAK STAT Signaling Pathway (KG)	0.0344382	4.4082	1
Concordant Upregulated genes:104	Maintenance of Cell Number (GO)	0.0344382	4.4082	1
Concordant Upregulated genes:104	Response to Drug (GO)	0.0350226	2.14017	1
Concordant Upregulated genes:104	Epithelial Cell Signaling in Helicobacter Pylori Infection (KG)	0.0350688	7.12838	1
Concordant Upregulated genes:104	Myeloid Cell Development (GO)	0.0350688	7.12838	1
Concordant Upregulated genes:104	Superoxide Metabolic Process (GO)	0.0350688	7.12838	1
Concordant Upregulated genes:104	Aminoglycan Catabolic Process (GO)	0.0350688	7.12838	1
discordant genes:97	Reg. of Phospholipid Metabolic Process (GO)	0.0351634	7.11933	1
discordant genes:97	Pos. Reg. of Protein Localization to Cell Periphery (GO)	0.0351634	7.11933	1
discordant genes:97	Intrinsic Apoptotic Signaling Pathway in Response to Endoplasmic Reticulum Stress (GO)	0.0351634	7.11933	1
discordant genes:97	Myeloid Cell Differentiation (GO)	0.0355088	2.88722	1
discordant genes:97	NCAM Signaling For Neurite Out Growth (Re)	0.0362063	7.00261	1
Concordant Upregulated genes:104	Reg. of Double Strand Break Repair (GO)	0.0370629	6.9061	1
Concordant Upregulated genes:104	Muscle Fiber Development (GO)	0.0370629	6.9061	1
Concordant Upregulated genes:104	Pos. Reg. of Blood Circulation (GO)	0.0370629	6.9061	1
discordant genes:97	Protein Polymerization (GO)	0.0371777	3.32975	1
discordant genes:97	Cellular Amino Acid Biosynthetic Process (GO)	0.0372611	6.88681	1
Concordant Upregulated genes:104	Ovulation Cycle (GO)	0.038076	6.80155	1
concordant Downregulated genes:28	Reg. of Cytoskeleton Organization (GO)	0.0383829	7.5099	1
Concordant Upregulated genes:104	Cytosolic Calcium Ion Transport (GO)	0.0390085	4.18853	1
concordant Downregulated genes:28	Reg. of Postsynaptic Membrane Neurotransmitter Receptor Levels (GO)	0.0391583	27.8876	1
discordant genes:97	Neuron Projection Guidance (GO)	0.0393945	3.26598	1
discordant genes:97	Adipocytokine Signaling Pathway (KG)	0.0394057	6.67186	1
discordant genes:97	Hif1 Tfpathway (PI)	0.0394057	6.67186	1
discordant genes:97	Synaptic Vesicle Recycling (GO)	0.0394057	6.67186	1
discordant genes:97	Reg. of Behavior (GO)	0.0394057	6.67186	1
Concordant Upregulated genes:104	ECM Affiliated (Na)	0.0396006	4.16216	1
concordant Downregulated genes:28	Aminoglycan Catabolic Process (GO)	0.0397589	27.4525	1
Concordant Upregulated genes:104	EGFR Interacts With Phospholipase C Gamma (Re)	0.0400458	27.7796	1
Concordant Upregulated genes:104	Reg. of FOXO Transcriptional Activity By Acetylation (Re)	0.0400458	27.7796	1
Concordant Upregulated genes:104	Leishmania Infection (KG)	0.0401339	6.60164	1
Concordant Upregulated genes:104	Pancreatic Cancer (KG)	0.0401339	6.60164	1
Concordant Upregulated genes:104	Response to Estrogen (GO)	0.0401339	6.60164	1
Concordant Upregulated genes:104	Skeletal Muscle Organ Development (GO)	0.0401972	4.13692	1
discordant genes:97	Reg. of Cardiac Conduction (GO)	0.0404953	6.56907	1
concordant Downregulated genes:28	Cellular Component Disassembly (GO)	0.0407564	7.2598	1
concordant Downregulated genes:28	Neuron Fate Commitment (GO)	0.0409591	26.6217	1
Concordant Upregulated genes:104	Renal Cell Carcinoma (KG)	0.0411783	6.50561	1
Concordant Upregulated genes:104	Cellular Response to Ionizing Radiation (GO)	0.0411783	6.50561	1
Concordant Upregulated genes:104	Pigment Metabolic Process (GO)	0.0411783	6.50561	1
discordant genes:97	Response to Endoplasmic Reticulum Stress (GO)	0.0412215	3.21667	1
discordant genes:97	Developmental Maturation (GO)	0.0412215	3.21667	1
Concordant Upregulated genes:104	Reg. of Cell Projection Assembly (GO)	0.0414041	4.08652	1
Concordant Upregulated genes:104	Response to Peptide Hormone (GO)	0.0414963	2.76413	1
Concordant Upregulated genes:104	Signaling By RHO Gtpases (Re)	0.0418522	2.75731	1
discordant genes:97	Reg. of FOXO Transcriptional Activity By Acetylation (Re)	0.0420101	26.441	1
discordant genes:97	Response to Inorganic Substance (GO)	0.0420436	2.47868	1
Concordant Upregulated genes:104	Adherens Junction (KG)	0.042233	6.41232	1
Concordant Upregulated genes:104	Reg. of Intracellular Steroid Hormone Receptor Signaling Pathway (GO)	0.042233	6.41232	1
Concordant Upregulated genes:104	Pos. Reg. of NIK NF kappaB Signaling (GO)	0.042233	6.41232	1
Concordant Upregulated genes:104	Cardiac Septum Morphogenesis (GO)	0.042233	6.41232	1
Concordant Upregulated genes:104	Pos. Reg. of Response to External Stimulus (GO)	0.0426643	3.18232	1
discordant genes:97	Long Term Potentiation (KG)	0.0427084	6.37228	1
discordant genes:97	Long Term Depression (KG)	0.0427084	6.37228	1
concordant Downregulated genes:28	Reg. of Multicellular Organism Growth (GO)	0.0427569	25.459	1
Concordant Upregulated genes:104	Protein Catabolic Process (GO)	0.0436905	2.14707	1
discordant genes:97	Pos. Reg. of Organelle Assembly (GO)	0.0438317	6.27823	1
concordant Downregulated genes:28	Transmission of Nerve Impulse (GO)	0.0439537	24.7407	1
Concordant Upregulated genes:104	Reg. of Cardiac Muscle Contraction (GO)	0.0443726	6.23352	1
Concordant Upregulated genes:104	Neg. Reg. of Stem Cell Proliferation (GO)	0.0443964	24.6983	1
Concordant Upregulated genes:104	Reg. of Phospholipase A2 Activity (GO)	0.0443964	24.6983	1
Concordant Upregulated genes:104	Dorsal Ventral Axis Specification (GO)	0.0443964	24.6983	1
Concordant Upregulated genes:104	Pos. Reg. of Tolerance Induction (GO)	0.0443964	24.6983	1
Concordant Upregulated genes:104	Mitral Valve Development (GO)	0.0443964	24.6983	1
Concordant Upregulated genes:104	Reg. of Nitric Oxide Mediated Signal Transduction (GO)	0.0443964	24.6983	1
Concordant Upregulated genes:104	Response to Peptidoglycan (GO)	0.0443964	24.6983	1
Concordant Upregulated genes:104	Pos. Reg. of Toll Like Receptor 4 Signaling Pathway (GO)	0.0443964	24.6983	1
Concordant Upregulated genes:104	Endothelial Cell Activation (GO)	0.0443964	24.6983	1
Concordant Upregulated genes:104	Trophoblast Cell Migration (GO)	0.0443964	24.6983	1
Concordant Upregulated genes:104	Postsynaptic Cytoskeleton Organization (GO)	0.0443964	24.6983	1
Concordant Upregulated genes:104	Reg. of Carbohydrate Metabolic Process By Reg. of Transcription From RNA Polymerase II Promoter (GO)	0.0443964	24.6983	1
Concordant Upregulated genes:104	AKT Phosphorylates Targets in The Nucleus (Re)	0.0443964	24.6983	1
Concordant Upregulated genes:104	Appendage Development (GO)	0.044501	3.9661	1
discordant genes:97	Protein Methylation (GO)	0.0447117	3.9562	1
Concordant Upregulated genes:104	MAPK Family Signaling Cascades (Re)	0.0449447	3.12673	1
discordant genes:97	Pos. Reg. of Catabolic Process (GO)	0.0449984	2.69682	1
Concordant Upregulated genes:104	Reg. of Signaling Receptor Activity (GO)	0.0451085	2.43721	1
Concordant Upregulated genes:104	Pos. Reg. of Multi Organism Process (GO)	0.045134	3.94282	1
Concordant Upregulated genes:104	Outflow Tract Morphogenesis (GO)	0.0454573	6.14779	1
Concordant Upregulated genes:104	Reg. of Blood Pressure (GO)	0.0457714	3.91982	1
discordant genes:97	Cardiac Muscle Contraction (KG)	0.046111	6.0982	1
discordant genes:97	Transmission of Nerve Impulse (GO)	0.046111	6.0982	1
discordant genes:97	Reg. of Intracellular Steroid Hormone Receptor Signaling Pathway (GO)	0.046111	6.0982	1
Concordant Upregulated genes:104	Carbohydrate Derivative Catabolic Process (GO)	0.0464133	3.89708	1
discordant genes:97	SET Pathway (Bi)	0.0465689	23.5072	1
discordant genes:97	Leptin Pathway (Bi)	0.0465689	23.5072	1
discordant genes:97	Pos. Reg. of Action Potential (GO)	0.0465689	23.5072	1
discordant genes:97	Embryonic Viscerocranium Morphogenesis (GO)	0.0465689	23.5072	1
discordant genes:97	Neg. Reg. of Cytosolic Calcium Ion Concentration (GO)	0.0465689	23.5072	1
discordant genes:97	Npp1 Pathway (Bi)	0.0465689	23.5072	1
discordant genes:97	Posttranslational Protein Targeting to Endoplasmic Reticulum Membrane (GO)	0.0465689	23.5072	1
discordant genes:97	Cytoskeletal Anchoring AT Plasma Membrane (GO)	0.0465689	23.5072	1
discordant genes:97	Pos. Reg. of Protein Kinase a Signaling (GO)	0.0465689	23.5072	1
discordant genes:97	Endothelial Cell Activation (GO)	0.0465689	23.5072	1
discordant genes:97	Behavioral Response to Ethanol (GO)	0.0465689	23.5072	1
discordant genes:97	Caveolin Mediated Endocytosis (GO)	0.0465689	23.5072	1
discordant genes:97	Protein Localization to Cell Cortex (GO)	0.0465689	23.5072	1
discordant genes:97	Reg. of Postsynaptic Cytosolic Calcium Ion Concentration (GO)	0.0465689	23.5072	1
discordant genes:97	Activation of PPARGC1A Pgc 1alpha By Phosphorylation (Re)	0.0465689	23.5072	1
discordant genes:97	Activation of The AP 1 Family of Transcription Factors (Re)	0.0465689	23.5072	1
discordant genes:97	RUNX1 and FOXP3 Control The Development of Regulatory T Lymphocytes Tregs (Re)	0.0465689	23.5072	1
discordant genes:97	RUNX3 Regulates P14 ARF (Re)	0.0465689	23.5072	1
Concordant Upregulated genes:104	Stress Activated Protein Kinase Signaling Cascade (GO)	0.0468176	3.08362	1
Concordant Upregulated genes:104	Pos. Reg. of Hemopoiesis (GO)	0.0470597	3.8746	1
discordant genes:97	E2F Pathway (PI)	0.0472668	6.01199	1
concordant Downregulated genes:28	Sperm Motility (GO)	0.0475361	22.7809	1
Concordant Upregulated genes:104	EGFR Smrte Pathway (Bi)	0.0487275	22.2079	1
Concordant Upregulated genes:104	Endosomal Vacuolar Pathway (Re)	0.0487275	22.2079	1
Concordant Upregulated genes:104	Ethanol Oxidation (Re)	0.0487275	22.2079	1
Concordant Upregulated genes:104	Response to Fungicide (GO)	0.0487275	22.2079	1
Concordant Upregulated genes:104	Response to Gravity (GO)	0.0487275	22.2079	1
Concordant Upregulated genes:104	Glucose 6 Phosphate Metabolic Process (GO)	0.0487275	22.2079	1
Concordant Upregulated genes:104	Neg. Reg. of Pathway Restricted SMAD Protein Phosphorylation (GO)	0.0487275	22.2079	1
Concordant Upregulated genes:104	Trophoblast Giant Cell Differentiation (GO)	0.0487275	22.2079	1
Concordant Upregulated genes:104	Natural Killer Cell Proliferation (GO)	0.0487275	22.2079	1
Concordant Upregulated genes:104	Oligopeptide Transport (GO)	0.0487275	22.2079	1
Concordant Upregulated genes:104	Neg. Reg. of Muscle Adaptation (GO)	0.0487275	22.2079	1
Concordant Upregulated genes:104	Bleb Assembly (GO)	0.0487275	22.2079	1
Concordant Upregulated genes:104	Histone H2B Ubiquitination (GO)	0.0487275	22.2079	1
Concordant Upregulated genes:104	Reg. of NAD P H Oxidase Activity (GO)	0.0487275	22.2079	1
Concordant Upregulated genes:104	Reg. of Transcription From RNA Polymerase II Promoter in Response to Oxidative Stress (GO)	0.0487275	22.2079	1
Concordant Upregulated genes:104	Cellular Ketone Body Metabolic Process (GO)	0.0487275	22.2079	1
Concordant Upregulated genes:104	Determination of Dorsal Ventral Asymmetry (GO)	0.0487275	22.2079	1
Concordant Upregulated genes:104	Pos. Reg. of Histone H3 K9 Methylation (GO)	0.0487275	22.2079	1
Concordant Upregulated genes:104	Reg. of Dopamine Receptor Signaling Pathway (GO)	0.0487275	22.2079	1
Concordant Upregulated genes:104	Mucus Secretion (GO)	0.0487275	22.2079	1
Concordant Upregulated genes:104	Extracellular Matrix Constituent Secretion (GO)	0.0487275	22.2079	1
Concordant Upregulated genes:104	Protein Localization to Early Endosome (GO)	0.0487275	22.2079	1
concordant Downregulated genes:28	Protein Localization to Synapse (GO)	0.0487275	22.2079	1
concordant Downregulated genes:28	Central Nervous System Neuron Development (GO)	0.0487275	22.2079	1
Concordant Upregulated genes:104	Pos. Reg. of Epithelial Cell Proliferation (GO)	0.0490257	3.80869	1
Concordant Upregulated genes:104	Reg. of Response to External Stimulus (GO)	0.0492946	2.21336	1
Concordant Upregulated genes:104	G Alpha 12 13 Signalling Events (Re)	0.0498929	5.82721	1
concordant Downregulated genes:28	Cell Fate Specification (GO)	0.0499175	21.6632	1
discordant genes:97	Organelle Biogenesis and Maintenance (Re)	0.0500326	3.01181	1
concordant Downregulated genes:28	Behavior (GO)	0.050033	6.45788	1
discordant genes:97	Metal Ion Transport (GO)	0.0502536	2.07909	1
concordant Downregulated genes:28	Reg. of Response to Endoplasmic Reticulum Stress (GO)	0.050512	21.3995	1
discordant genes:97	Phosphatidylinositol Signaling System (KG)	0.0507972	5.76736	1
concordant Downregulated genes:28	Reg. of Sodium Ion Transport (GO)	0.0511062	21.1417	1
discordant genes:97	Vitcb Pathway (Bi)	0.0511062	21.1417	1
discordant genes:97	Response to Fungicide (GO)	0.0511062	21.1417	1
discordant genes:97	Pos. Reg. of Fibroblast Migration (GO)	0.0511062	21.1417	1
discordant genes:97	Neg. Reg. of Endoplasmic Reticulum Unfolded Protein Response (GO)	0.0511062	21.1417	1
discordant genes:97	Signal Peptide Processing (GO)	0.0511062	21.1417	1
discordant genes:97	Neg. Reg. of B-Cell Apoptotic Process (GO)	0.0511062	21.1417	1
discordant genes:97	NPC Pathway (Bi)	0.0511062	21.1417	1
discordant genes:97	DNA Topological Change (GO)	0.0511062	21.1417	1
discordant genes:97	Lipid Glycosylation (GO)	0.0511062	21.1417	1
discordant genes:97	Cellular Hyperosmotic Response (GO)	0.0511062	21.1417	1
discordant genes:97	Postsynaptic Membrane Assembly (GO)	0.0511062	21.1417	1
discordant genes:97	Reg. of Neuromuscular Junction Development (GO)	0.0511062	21.1417	1
discordant genes:97	Reg. of Gene Expression By Hypoxia Inducible Factor (Re)	0.0511062	21.1417	1
discordant genes:97	Condensation of Prometaphase Chromosomes (Re)	0.0511062	21.1417	1
discordant genes:97	Receptor Mediated Mitophagy (Re)	0.0511062	21.1417	1
discordant genes:97	Aspartate and Asparagine Metabolism (Re)	0.0511062	21.1417	1
Concordant Upregulated genes:104	Actomyosin Structure Organization (GO)	0.051709	3.72423	1
Concordant Upregulated genes:104	NOTCH Signaling Pathway (GO)	0.051709	3.72423	1
discordant genes:97	Pre NOTCH Expression and Processing (Re)	0.0519947	5.69017	1
discordant genes:97	Calcium Signaling Pathway (KG)	0.0523131	3.70397	1
concordant Downregulated genes:28	Protein Localization to Membrane (GO)	0.0523489	6.29149	1
Concordant Upregulated genes:104	Muscle Cell Proliferation (GO)	0.0523908	3.7037	1
Concordant Upregulated genes:104	Production of Molecular Mediator of Immune Response (GO)	0.0523908	3.7037	1
Concordant Upregulated genes:104	Cytokine Mediated Signaling Pathway (GO)	0.0526106	2.17899	1
discordant genes:97	Extracellular Matrix Organization (Re)	0.0526509	2.9594	1
Concordant Upregulated genes:104	Pos. Reg. of Cell Activation (GO)	0.0526952	2.96106	1
Concordant Upregulated genes:104	Lym Pathway (Bi)	0.0530392	20.1865	1
Concordant Upregulated genes:104	CBL Pathway (Bi)	0.0530392	20.1865	1
Concordant Upregulated genes:104	Actiny Pathway (Bi)	0.0530392	20.1865	1
Concordant Upregulated genes:104	Pos. Reg. of Gluconeogenesis (GO)	0.0530392	20.1865	1
Concordant Upregulated genes:104	Glycine Transport (GO)	0.0530392	20.1865	1
Concordant Upregulated genes:104	Neg. Reg. of Single Stranded Viral RNA Replication Via Double Stranded DNA Intermediate (GO)	0.0530392	20.1865	1
Concordant Upregulated genes:104	Neurotransmitter Gated Ion Channel Clustering (GO)	0.0530392	20.1865	1
Concordant Upregulated genes:104	Reg. of Integrin Mediated Signaling Pathway (GO)	0.0530392	20.1865	1
Concordant Upregulated genes:104	Reg. of Localization of FOXO Transcription Factors (Re)	0.0530392	20.1865	1
Concordant Upregulated genes:104	Reg. of Cytokine Production Involved in Immune Response (GO)	0.0533181	5.60781	1
discordant genes:97	Reg. of Protein Localization to Membrane (GO)	0.0537585	3.66153	1
discordant genes:97	P73pathway (PI)	0.0544197	5.5418	1
discordant genes:97	G Alpha 12 13 Signalling Events (Re)	0.0544197	5.5418	1
Concordant Upregulated genes:104	Non Recombinational Repair (GO)	0.0544781	5.53829	1
discordant genes:97	Endocytosis (KG)	0.0544883	3.64068	1
discordant genes:97	Programmed Cell Death (Re)	0.0544883	3.64068	1
Concordant Upregulated genes:104	Interspecies Interaction Between Organisms (GO)	0.0545298	2.04489	1
Concordant Upregulated genes:104	Cellular Response to Abiotic Stimulus (GO)	0.0547404	2.92231	1
discordant genes:97	Receptor Metabolic Process (GO)	0.055223	3.62007	1
concordant Downregulated genes:28	Supramolecular Fiber Organization (GO)	0.0553391	6.09292	1
discordant genes:97	Barrestin Pathway (Bi)	0.0556222	19.2236	1
discordant genes:97	CARM1 Pathway (Bi)	0.0556222	19.2236	1
discordant genes:97	Gap Junction Degradation (Re)	0.0556222	19.2236	1
discordant genes:97	Hemidesmosome Assembly (GO)	0.0556222	19.2236	1
discordant genes:97	Neuronal Ion Channel Clustering (GO)	0.0556222	19.2236	1
discordant genes:97	Detection of Mechanical Stimulus Involved in Sensory Perception of Sound (GO)	0.0556222	19.2236	1
discordant genes:97	Reg. of Cell Communication By Electrical Coupling (GO)	0.0556222	19.2236	1
discordant genes:97	Skeletal Muscle Acetylcholine Gated Channel Clustering (GO)	0.0556222	19.2236	1
discordant genes:97	Chemokine C X C Motif Ligand 2 Production (GO)	0.0556222	19.2236	1
discordant genes:97	Response to Antimetabolite (GO)	0.0556222	19.2236	1
discordant genes:97	Reg. of GTP Binding (GO)	0.0556222	19.2236	1
discordant genes:97	Presynaptic Depolarization and Calcium Channel Opening (Re)	0.0556222	19.2236	1
discordant genes:97	RHO Gtpases Activate KTN1 (Re)	0.0556222	19.2236	1
discordant genes:97	Activation of The TFAP2 AP 2 Family of Transcription Factors (Re)	0.0556222	19.2236	1
Concordant Upregulated genes:104	Integrin Cell Surface Interactions (Re)	0.055647	5.4712	1
Concordant Upregulated genes:104	Myoblast Differentiation (GO)	0.055647	5.4712	1
discordant genes:97	Smad2 3nuclear Pathway (PI)	0.055647	5.4712	1
discordant genes:97	Protein Localization to Synapse (GO)	0.055647	5.4712	1
concordant Downregulated genes:28	ERAD Pathway (GO)	0.0558474	19.2789	1
discordant genes:97	Pos. Reg. of Binding (GO)	0.0559624	3.59969	1
discordant genes:97	Asparagine N Linked Glycosylation (Re)	0.0564408	2.88896	1
Concordant Upregulated genes:104	TGF Beta Signaling Pathway (KG)	0.0568247	5.40502	1
Concordant Upregulated genes:104	ECM Receptor Interaction (KG)	0.0568247	5.40502	1
Concordant Upregulated genes:104	Pos. Reg. of Smooth Muscle Cell Proliferation (GO)	0.0568247	5.40502	1
discordant genes:97	Myc Activ Pathway (PI)	0.0568841	5.40169	1
concordant Downregulated genes:28	Pos. Reg. of Ubiquitin Dependent Protein Catabolic Process (GO)	0.0570293	18.8616	1
Concordant Upregulated genes:104	Trafficking and Processing of Endosomal TLR (Re)	0.0573316	18.5162	1
Concordant Upregulated genes:104	Keratan Sulfate Degradation (Re)	0.0573316	18.5162	1
Concordant Upregulated genes:104	Neg. Reg. of Intracellular Estrogen Receptor Signaling Pathway (GO)	0.0573316	18.5162	1
Concordant Upregulated genes:104	Oligosaccharide Catabolic Process (GO)	0.0573316	18.5162	1
Concordant Upregulated genes:104	Spongiotrophoblast Layer Development (GO)	0.0573316	18.5162	1
Concordant Upregulated genes:104	Chemical Homeostasis Within a Tissue (GO)	0.0573316	18.5162	1
Concordant Upregulated genes:104	Protein Heterotrimerization (GO)	0.0573316	18.5162	1
Concordant Upregulated genes:104	Response to Inactivity (GO)	0.0573316	18.5162	1
Concordant Upregulated genes:104	Eyelid Development in Camera Type Eye (GO)	0.0573316	18.5162	1
Concordant Upregulated genes:104	Hydrogen Peroxide Metabolic Process (GO)	0.0573316	18.5162	1
Concordant Upregulated genes:104	Midgut Development (GO)	0.0573316	18.5162	1
Concordant Upregulated genes:104	Neg. Reg. of Substrate Adhesion Dependent Cell Spreading (GO)	0.0573316	18.5162	1
Concordant Upregulated genes:104	Complement Activation Lectin Pathway (GO)	0.0573316	18.5162	1
Concordant Upregulated genes:104	Pos. Reg. of Systemic Arterial Blood Pressure (GO)	0.0573316	18.5162	1
Concordant Upregulated genes:104	SMAD Protein Complex Assembly (GO)	0.0573316	18.5162	1
Concordant Upregulated genes:104	Magnesium Ion Homeostasis (GO)	0.0573316	18.5162	1
Concordant Upregulated genes:104	Genitalia Morphogenesis (GO)	0.0573316	18.5162	1
Concordant Upregulated genes:104	Telomere Maintenance in Response to DNA Damage (GO)	0.0573316	18.5162	1
Concordant Upregulated genes:104	Engulfment of Apoptotic Cell (GO)	0.0573316	18.5162	1
Concordant Upregulated genes:104	DNA Deamination (GO)	0.0573316	18.5162	1
Concordant Upregulated genes:104	Reg. of RNA Polymerase II Regulatory Region Sequence Specific DNA Binding (GO)	0.0573316	18.5162	1
Concordant Upregulated genes:104	Reg. of Glial Cell Migration (GO)	0.0573316	18.5162	1
Concordant Upregulated genes:104	Neg. Reg. of Double Strand Break Repair Via Homologous Recombination (GO)	0.0573316	18.5162	1
Concordant Upregulated genes:104	Wnt5a Dependent Internalization of FZD2 FZD5 and ROR2 (Re)	0.0573316	18.5162	1
Concordant Upregulated genes:104	FGFRL1 Modulation of FGFR1 Signaling (Re)	0.0573316	18.5162	1
discordant genes:97	Reg. of Organelle Assembly (GO)	0.0574554	3.55884	1
Concordant Upregulated genes:104	Pos. Reg. of Cell Differentiation (GO)	0.0580046	2.01672	1
Concordant Upregulated genes:104	Platelet Homeostasis (Re)	0.0580112	5.34042	1
discordant genes:97	Intracellular Signaling By Second Messengers (Re)	0.0581092	2.85977	1
discordant genes:97	Reg Gr Pathway (PI)	0.0581308	5.33391	1
discordant genes:97	NOTCH Signaling Pathway (GO)	0.058209	3.53915	1
concordant Downregulated genes:28	Reg. of Heart Rate (GO)	0.0582099	18.4603	1
Concordant Upregulated genes:104	Reg. of Transferase Activity (GO)	0.0583005	2.0144	1
Concordant Upregulated genes:104	Immune System Development (GO)	0.0591938	2.00749	1
Concordant Upregulated genes:104	Hematopoietic Cell Lineage (KG)	0.0592063	5.27732	1
Concordant Upregulated genes:104	Pos. Reg. of Myeloid Cell Differentiation (GO)	0.0592063	5.27732	1
discordant genes:97	Cell Division (GO)	0.0595284	2.26225	1
Concordant Upregulated genes:104	Urogenital System Development (GO)	0.0600403	2.82966	1
discordant genes:97	Ace2 Pathway (Bi)	0.0601169	17.6138	1
discordant genes:97	Ucalpain Pathway (Bi)	0.0601169	17.6138	1
discordant genes:97	Traf3 Dependent IRF Activation Pathway (Re)	0.0601169	17.6138	1
discordant genes:97	Reg. of Rac Protein Signal Transduction (GO)	0.0601169	17.6138	1
discordant genes:97	Diacylglycerol Metabolic Process (GO)	0.0601169	17.6138	1
discordant genes:97	Reg. of Histone H4 Acetylation (GO)	0.0601169	17.6138	1
discordant genes:97	PCAF Pathway (Bi)	0.0601169	17.6138	1
discordant genes:97	Magnesium Ion Homeostasis (GO)	0.0601169	17.6138	1
discordant genes:97	Neuron Remodeling (GO)	0.0601169	17.6138	1
discordant genes:97	Collagen Activated Signaling Pathway (GO)	0.0601169	17.6138	1
discordant genes:97	Hormone Catabolic Process (GO)	0.0601169	17.6138	1
discordant genes:97	Pos. Reg. of Membrane Potential (GO)	0.0601169	17.6138	1
discordant genes:97	Pos. Reg. of Ruffle Assembly (GO)	0.0601169	17.6138	1
discordant genes:97	CLEC7A Dectin 1 Induces NFAT Activation (Re)	0.0601169	17.6138	1
Concordant Upregulated genes:104	Prostate Cancer (KG)	0.0604099	5.21569	1
Concordant Upregulated genes:104	Collagen Formation (Re)	0.0604099	5.21569	1
Concordant Upregulated genes:104	Dorsal Ventral Pattern Formation (GO)	0.0604099	5.21569	1
Concordant Upregulated genes:104	Fcgamma Receptor FCGR Dependent Phagocytosis (Re)	0.0604099	5.21569	1
discordant genes:97	Cmyb Pathway (PI)	0.0606526	5.20329	1
discordant genes:97	Integrin Cell Surface Interactions (Re)	0.0606526	5.20329	1
discordant genes:97	Reg. of Sodium Ion Transport (GO)	0.0606526	5.20329	1
concordant Downregulated genes:28	Isoprenoid Metabolic Process (GO)	0.0611555	17.535	1
concordant Downregulated genes:28	Visual Phototransduction (Re)	0.0611555	17.535	1
Concordant Upregulated genes:104	Granulocytes Pathway (Bi)	0.0616048	17.0916	1
Concordant Upregulated genes:104	Eryth Pathway (Bi)	0.0616048	17.0916	1
Concordant Upregulated genes:104	Reg. of Vasculogenesis (GO)	0.0616048	17.0916	1
Concordant Upregulated genes:104	Alditol Metabolic Process (GO)	0.0616048	17.0916	1
Concordant Upregulated genes:104	Pos. Reg. of Striated Muscle Contraction (GO)	0.0616048	17.0916	1
Concordant Upregulated genes:104	Behavioral Response to Pain (GO)	0.0616048	17.0916	1
Concordant Upregulated genes:104	Reg. of Secondary Metabolic Process (GO)	0.0616048	17.0916	1
Concordant Upregulated genes:104	Response to Redox State (GO)	0.0616048	17.0916	1
Concordant Upregulated genes:104	Plasma Membrane Phospholipid Scrambling (GO)	0.0616048	17.0916	1
Concordant Upregulated genes:104	Toll Like Receptor 2 Signaling Pathway (GO)	0.0616048	17.0916	1
Concordant Upregulated genes:104	Reg. of Postsynaptic Membrane Organization (GO)	0.0616048	17.0916	1
Concordant Upregulated genes:104	RHO Protein Signal Transduction (GO)	0.0616479	3.45533	1
discordant genes:97	ECM Receptor Interaction (KG)	0.0619275	5.14032	1
Concordant Upregulated genes:104	Activation of Protein Kinase Activity (GO)	0.0622346	2.79419	1
concordant Downregulated genes:28	Maintenance of Protein Location (GO)	0.0623314	17.1854	1
concordant Downregulated genes:28	Vesicle Mediated Transport (Re)	0.0623324	5.68332	1
Concordant Upregulated genes:104	Response to Mechanical Stimulus (GO)	0.0623898	3.43759	1
discordant genes:97	Reg. of Cell Development (GO)	0.0623947	1.98056	1
concordant Downregulated genes:28	Neg. Reg. of Cellular Component Organization (GO)	0.0624987	5.67445	1
discordant genes:97	Adaptive Immune System (Re)	0.0625702	2.08595	1
Concordant Upregulated genes:104	Dilated Cardiomyopathy (KG)	0.0628424	5.09641	1
discordant genes:97	Platelet Homeostasis (Re)	0.0632115	5.07862	1
discordant genes:97	Dendritic Spine Development (GO)	0.0632115	5.07862	1
discordant genes:97	Pos. Reg. of Cellular Protein Localization (GO)	0.0632725	2.77559	1
Concordant Upregulated genes:104	Response to Molecule of Bacterial Origin (GO)	0.0639081	2.76816	1
concordant Downregulated genes:28	Polysaccharide Metabolic Process (GO)	0.0640928	16.6961	1
discordant genes:97	Reg. of Cation Transmembrane Transport (GO)	0.0644519	2.75754	1
discordant genes:97	Hematopoietic Cell Lineage (KG)	0.0645046	5.01814	1
discordant genes:97	Plateletapp Pathway (Bi)	0.0645905	16.2651	1
discordant genes:97	Retrograde Neurotrophin Signalling (Re)	0.0645905	16.2651	1
discordant genes:97	Sema3a Plexin Repulsion Signaling By Inhibiting Integrin Adhesion (Re)	0.0645905	16.2651	1
discordant genes:97	DCC Mediated Attractive Signaling (Re)	0.0645905	16.2651	1
discordant genes:97	Thalamus Development (GO)	0.0645905	16.2651	1
discordant genes:97	Racc Pathway (Bi)	0.0645905	16.2651	1
discordant genes:97	Reg. of Sphingolipid Biosynthetic Process (GO)	0.0645905	16.2651	1
discordant genes:97	Neg. Reg. of Protein Localization to Cell Surface (GO)	0.0645905	16.2651	1
Concordant Upregulated genes:104	Synaptic Transmission Glutamatergic (GO)	0.0653078	4.98252	1
Concordant Upregulated genes:104	Drug Metabolic Process (GO)	0.0656052	2.74249	1
discordant genes:97	Cell Growth (GO)	0.0656917	2.40863	1
discordant genes:97	Collagen Formation (Re)	0.0658066	4.96004	1
discordant genes:97	Fcgamma Receptor FCGR Dependent Phagocytosis (Re)	0.0658066	4.96004	1
Concordant Upregulated genes:104	ERBB Network Pathway (PI)	0.0658589	15.8711	1
Concordant Upregulated genes:104	Yap1 and WWTR1 Taz Stimulated Gene Expression (Re)	0.0658589	15.8711	1
Concordant Upregulated genes:104	IRAK1 Recruits IKK Complex (Re)	0.0658589	15.8711	1
Concordant Upregulated genes:104	Pos. Reg. of Viral Release From Host Cell (GO)	0.0658589	15.8711	1
Concordant Upregulated genes:104	Megakaryocyte Development (GO)	0.0658589	15.8711	1
Concordant Upregulated genes:104	Acrosome Assembly (GO)	0.0658589	15.8711	1
Concordant Upregulated genes:104	Response to Stimulus Involved in Reg. of Muscle Adaptation (GO)	0.0658589	15.8711	1
Concordant Upregulated genes:104	Pos. Reg. of Voltage Gated Potassium Channel Activity (GO)	0.0658589	15.8711	1
Concordant Upregulated genes:104	TFAP2 AP 2 Family Regulates Transcription of Growth Factors and Their Receptors (Re)	0.0658589	15.8711	1
discordant genes:97	Reg. of Endocytosis (GO)	0.0660013	3.35314	1
Concordant Upregulated genes:104	Cofactor Biosynthetic Process (GO)	0.0661618	3.35155	1
Concordant Upregulated genes:104	Neg. Reg. of Intracellular Signal Transduction (GO)	0.0661686	2.40582	1
Concordant Upregulated genes:104	Response to Antineoplastic Agent (GO)	0.0665526	4.92638	1
Concordant Upregulated genes:104	Reg. of Body Fluid Levels (GO)	0.0671076	2.39544	1
discordant genes:97	Reg. of Dephosphorylation (GO)	0.0676148	3.31819	1
Concordant Upregulated genes:104	Class B 2 Secretin Family Receptors (Re)	0.0678053	4.87282	1
discordant genes:97	Reg. of Neurotransmitter Levels (GO)	0.0680595	2.70466	1
discordant genes:97	Cell Surface Receptor Signaling Pathway Involved in Cell Cell Signaling (GO)	0.0681847	2.18017	1
discordant genes:97	Myeloid Leukocyte Differentiation (GO)	0.0684283	3.30098	1
Concordant Upregulated genes:104	Cellular Response to Inorganic Substance (GO)	0.0684745	3.30193	1
discordant genes:97	Reg. of Golgi Organization (GO)	0.0690431	15.1043	1
discordant genes:97	Wound Healing Spreading of Epidermal Cells (GO)	0.0690431	15.1043	1
discordant genes:97	Pos. Reg. of Vascular Endothelial Growth Factor Receptor Signaling Pathway (GO)	0.0690431	15.1043	1
discordant genes:97	Response to Water (GO)	0.0690431	15.1043	1
discordant genes:97	Aman Pathway (Bi)	0.0690431	15.1043	1
discordant genes:97	Protein Catabolic Process in The Vacuole (GO)	0.0690431	15.1043	1
discordant genes:97	Pseudopodium Organization (GO)	0.0690431	15.1043	1
discordant genes:97	Cell Cell Adhesion Mediated By Integrin (GO)	0.0690431	15.1043	1
discordant genes:97	Adhesion of Symbiont to Host (GO)	0.0690431	15.1043	1
discordant genes:97	Phosphorylation Site Mutants of CTNNB1 Are NOT Targeted to The Proteasome By The Destruction Complex (Re)	0.0690431	15.1043	1
discordant genes:97	Focal Adhesion (KG)	0.0692463	3.28395	1
discordant genes:97	Vascular Endothelial Growth Factor Receptor Signaling Pathway (GO)	0.0697651	4.79133	1
discordant genes:97	Activation of NMDA Receptors and Postsynaptic Events (Re)	0.0697651	4.79133	1
Concordant Upregulated genes:104	Neg. Reg. of Meiotic Cell Cycle (GO)	0.0700939	14.8143	1
Concordant Upregulated genes:104	Neg. Reg. of Interleukin 12 Production (GO)	0.0700939	14.8143	1
Concordant Upregulated genes:104	Neutrophil Homeostasis (GO)	0.0700939	14.8143	1
Concordant Upregulated genes:104	Prostaglandin Transport (GO)	0.0700939	14.8143	1
Concordant Upregulated genes:104	Antibiotic Biosynthetic Process (GO)	0.0700939	14.8143	1
Concordant Upregulated genes:104	Chondrocyte Proliferation (GO)	0.0700939	14.8143	1
Concordant Upregulated genes:104	Neg. Reg. of Ubiquitin Protein Transferase Activity (GO)	0.0700939	14.8143	1
Concordant Upregulated genes:104	Coronary Vasculature Morphogenesis (GO)	0.0700939	14.8143	1
Concordant Upregulated genes:104	FOXO Mediated Transcription of Cell Death Genes (Re)	0.0700939	14.8143	1
concordant Downregulated genes:28	Actin Filament Based Process (GO)	0.0703176	5.29372	1
Concordant Upregulated genes:104	Fc Gamma R Mediated Phagocytosis (KG)	0.0703343	4.7689	1
Concordant Upregulated genes:104	Reg. of Oxidoreductase Activity (GO)	0.0703343	4.7689	1
discordant genes:97	Recruitment of Numa to Mitotic Centrosomes (Re)	0.0711017	4.73793	1
discordant genes:97	Synaptic Transmission Glutamatergic (GO)	0.0711017	4.73793	1
discordant genes:97	Eph Ephrin Signaling (Re)	0.0711017	4.73793	1
Concordant Upregulated genes:104	Cell Cell Adhesion (GO)	0.0712913	2.0219	1
discordant genes:97	Membrane Lipid Metabolic Process (GO)	0.071727	3.23389	1
discordant genes:97	Vesicle Mediated Transport in Synapse (GO)	0.071727	3.23389	1
discordant genes:97	Activation of Protein Kinase Activity (GO)	0.0717704	2.65383	1
discordant genes:97	Signaling By Receptor Tyrosine Kinases (Re)	0.0722232	2.33927	1
discordant genes:97	B-Cell Proliferation (GO)	0.0724467	4.68566	1
discordant genes:97	Mitochondrial Biogenesis (Re)	0.0724467	4.68566	1
concordant Downregulated genes:28	MHC Class II Antigen Presentation (Re)	0.0728544	14.601	1
Concordant Upregulated genes:104	Antigen Processing Cross Presentation (Re)	0.0728938	4.66914	1
Concordant Upregulated genes:104	Integrin Mediated Signaling Pathway (GO)	0.0728938	4.66914	1
Concordant Upregulated genes:104	Peptidyl Tyrosine Modification (GO)	0.0732308	2.63693	1
discordant genes:97	Il7 Pathway (Bi)	0.0734747	14.0998	1
discordant genes:97	Pitx2 Pathway (Bi)	0.0734747	14.0998	1
discordant genes:97	Nfkappab Atypical Pathway (PI)	0.0734747	14.0998	1
discordant genes:97	DNA Pk Pathway (PI)	0.0734747	14.0998	1
discordant genes:97	Smad2 3pathway (PI)	0.0734747	14.0998	1
discordant genes:97	Platelet Sensitization By LDL (Re)	0.0734747	14.0998	1
discordant genes:97	Pos. Reg. of Histone H3 K4 Methylation (GO)	0.0734747	14.0998	1
discordant genes:97	Morphogenesis of An Endothelium (GO)	0.0734747	14.0998	1
discordant genes:97	Peptidyl Lysine Dimethylation (GO)	0.0734747	14.0998	1
discordant genes:97	Pos. Reg. of Sodium Ion Transmembrane Transporter Activity (GO)	0.0734747	14.0998	1
discordant genes:97	Growth Hormone Secretion (GO)	0.0734747	14.0998	1
discordant genes:97	Coronary Vasculature Morphogenesis (GO)	0.0734747	14.0998	1
discordant genes:97	Dendrite Self Avoidance (GO)	0.0734747	14.0998	1
discordant genes:97	Pos. Reg. of Calcineurin Mediated Signaling (GO)	0.0734747	14.0998	1
discordant genes:97	Reg. of Postsynaptic Density Organization (GO)	0.0734747	14.0998	1
discordant genes:97	Chaperone Mediated Autophagy (Re)	0.0734747	14.0998	1
discordant genes:97	FOXO Mediated Transcription of Cell Death Genes (Re)	0.0734747	14.0998	1
discordant genes:97	Pos. Reg. of Endocytosis (GO)	0.0738	4.63451	1
discordant genes:97	Reg. of Calcium Mediated Signaling (GO)	0.0738	4.63451	1
discordant genes:97	Signaling By NOTCH (Re)	0.0742476	3.18531	1
Concordant Upregulated genes:104	Renin Angiotensin System (KG)	0.07431	13.891	1
Concordant Upregulated genes:104	Dc Pathway (Bi)	0.07431	13.891	1
Concordant Upregulated genes:104	Spry Pathway (Bi)	0.07431	13.891	1
Concordant Upregulated genes:104	Tel Pathway (Bi)	0.07431	13.891	1
Concordant Upregulated genes:104	Syndecan 3 Pathway (PI)	0.07431	13.891	1
Concordant Upregulated genes:104	GAB1 Signalosome (Re)	0.07431	13.891	1
Concordant Upregulated genes:104	Reg. of Epithelial Cell Differentiation Involved in Kidney Development (GO)	0.07431	13.891	1
Concordant Upregulated genes:104	Neg. Reg. of Peptidyl Threonine Phosphorylation (GO)	0.07431	13.891	1
Concordant Upregulated genes:104	Retinoic Acid Metabolic Process (GO)	0.07431	13.891	1
Concordant Upregulated genes:104	Plasma Membrane Fusion (GO)	0.07431	13.891	1
Concordant Upregulated genes:104	Craniofacial Suture Morphogenesis (GO)	0.07431	13.891	1
Concordant Upregulated genes:104	Reg. of Defense Response to Bacterium (GO)	0.07431	13.891	1
Concordant Upregulated genes:104	Myoblast Proliferation (GO)	0.07431	13.891	1
Concordant Upregulated genes:104	Reg. of Programmed Necrotic Cell Death (GO)	0.07431	13.891	1
Concordant Upregulated genes:104	Lamellipodium Morphogenesis (GO)	0.07431	13.891	1
Concordant Upregulated genes:104	Pos. Reg. of Macrophage Migration (GO)	0.07431	13.891	1
Concordant Upregulated genes:104	FOXO Mediated Transcription of Cell Cycle Genes (Re)	0.07431	13.891	1
discordant genes:97	Immune System Development (GO)	0.0744258	1.90143	1
Concordant Upregulated genes:104	Ear Development (GO)	0.0748198	3.17646	1
concordant Downregulated genes:28	Specification of Symmetry (GO)	0.0751782	14.1287	1
concordant Downregulated genes:28	Adaptive Immune System (Re)	0.0752352	5.08453	1
Concordant Upregulated genes:104	Pos. Reg. of Transmembrane Receptor Protein Serine Threonine Kinase Signaling Pathway (GO)	0.0754833	4.57329	1
concordant Downregulated genes:28	Axon Guidance (KG)	0.0763381	13.9038	1
discordant genes:97	Response to Leukemia Inhibitory Factor (GO)	0.076531	4.53504	1
Concordant Upregulated genes:104	Isoprenoid Metabolic Process (GO)	0.076789	4.52646	1
discordant genes:97	Cellular Response to Inorganic Substance (GO)	0.0768074	3.13815	1
discordant genes:97	Reg. of Catabolic Process (GO)	0.0773627	1.88419	1
discordant genes:97	Reg. of Actin Cytoskeleton (KG)	0.0776693	3.12274	1
discordant genes:97	Ndkdynamin Pathway (Bi)	0.0778855	13.2112	1
discordant genes:97	PML Pathway (Bi)	0.0778855	13.2112	1
discordant genes:97	Barrestin Src Pathway (Bi)	0.0778855	13.2112	1
discordant genes:97	Cellular Sodium Ion Homeostasis (GO)	0.0778855	13.2112	1
discordant genes:97	Response to Caffeine (GO)	0.0778855	13.2112	1
discordant genes:97	Reg. of Defense Response to Bacterium (GO)	0.0778855	13.2112	1
discordant genes:97	Lamellipodium Morphogenesis (GO)	0.0778855	13.2112	1
discordant genes:97	Fatty Acid Transmembrane Transport (GO)	0.0778855	13.2112	1
discordant genes:97	Reg. of RUNX1 Expression and Activity (Re)	0.0778855	13.2112	1
concordant Downregulated genes:28	Cell Adhesion Molecules Cams (KG)	0.0780755	13.5683	1
Concordant Upregulated genes:104	PTEN Pathway (Bi)	0.0785072	13.0666	1
Concordant Upregulated genes:104	Cardiacegf Pathway (Bi)	0.0785072	13.0666	1
Concordant Upregulated genes:104	Gastrin CREB Signalling Pathway Via PKC and MAPK (Re)	0.0785072	13.0666	1
Concordant Upregulated genes:104	Activation of NF kappaB Inducing Kinase Activity (GO)	0.0785072	13.0666	1
Concordant Upregulated genes:104	Pos. Reg. of Transcription of NOTCH Receptor Target (GO)	0.0785072	13.0666	1
Concordant Upregulated genes:104	Neg. Reg. of Vascular Smooth Muscle Cell Proliferation (GO)	0.0785072	13.0666	1
Concordant Upregulated genes:104	Metabolism of Angiotensinogen to Angiotensins (Re)	0.0785072	13.0666	1
Concordant Upregulated genes:104	Naplus Cl Dependent Neurotransmitter Transporters (Re)	0.0785072	13.0666	1
discordant genes:97	Organelle Assembly (GO)	0.0788412	1.96816	1
discordant genes:97	Reg. of Chromosome Segregation (GO)	0.0792937	4.44078	1
discordant genes:97	Transcriptional Reg. By RUNX3 (Re)	0.0792937	4.44078	1
discordant genes:97	Cellular Homeostasis (GO)	0.0799896	1.86935	1
concordant Downregulated genes:28	Reg. of Peptidyl Serine Phosphorylation (GO)	0.0803874	13.1594	1
Concordant Upregulated genes:104	Pos. Reg. of Transporter Activity (GO)	0.080749	4.39326	1
concordant Downregulated genes:28	Cell Surface Interactions AT The Vascular Wall (Re)	0.0809646	13.0609	1
Concordant Upregulated genes:104	Reg. of Cytoskeleton Organization (GO)	0.081037	2.25883	1
discordant genes:97	Response to Nitrogen Compound (GO)	0.0811318	1.86305	1
discordant genes:97	Cellular Protein Complex Disassembly (GO)	0.0811596	3.06255	1
Concordant Upregulated genes:104	Pos. Reg. of Nucleobase Containing Compound Metabolic Process (GO)	0.0814177	3.06006	1
concordant Downregulated genes:28	Protein Localization to Endoplasmic Reticulum (GO)	0.0815414	12.9639	1
discordant genes:97	Gnrh Signaling Pathway (KG)	0.0820875	4.34947	1
discordant genes:97	Pre NOTCH Processing in Golgi (Re)	0.0822755	12.4373	1
discordant genes:97	Neg. Reg. of Sodium Ion Transport (GO)	0.0822755	12.4373	1
discordant genes:97	Transepithelial Transport (GO)	0.0822755	12.4373	1
discordant genes:97	Grooming Behavior (GO)	0.0822755	12.4373	1
discordant genes:97	Oligosaccharide Biosynthetic Process (GO)	0.0822755	12.4373	1
discordant genes:97	Retina Vasculature Development in Camera Type Eye (GO)	0.0822755	12.4373	1
discordant genes:97	Pos. Reg. of Transcription of NOTCH Receptor Target (GO)	0.0822755	12.4373	1
discordant genes:97	Stress Granule Assembly (GO)	0.0822755	12.4373	1
discordant genes:97	Osteoclast Development (GO)	0.0822755	12.4373	1
discordant genes:97	Neurotransmitter Catabolic Process (GO)	0.0822755	12.4373	1
discordant genes:97	Histone H3 K27 Methylation (GO)	0.0822755	12.4373	1
discordant genes:97	Chemokine Secretion (GO)	0.0822755	12.4373	1
discordant genes:97	Establishment of Protein Localization to Postsynaptic Membrane (GO)	0.0822755	12.4373	1
discordant genes:97	RORA Activates Gene Expression (Re)	0.0822755	12.4373	1
discordant genes:97	Crosslinking of Collagen Fibrils (Re)	0.0822755	12.4373	1
Concordant Upregulated genes:104	Mcalpain Pathway (Bi)	0.0826855	12.3432	1
Concordant Upregulated genes:104	Tob1 Pathway (Bi)	0.0826855	12.3432	1
Concordant Upregulated genes:104	Tgfb Pathway (Bi)	0.0826855	12.3432	1
Concordant Upregulated genes:104	Hif1a Pathway (PI)	0.0826855	12.3432	1
Concordant Upregulated genes:104	Inflammasomes (Re)	0.0826855	12.3432	1
Concordant Upregulated genes:104	Cellular Response to Reactive Nitrogen Species (GO)	0.0826855	12.3432	1
Concordant Upregulated genes:104	Scavenging By Class a Receptors (Re)	0.0826855	12.3432	1
Concordant Upregulated genes:104	Reg. of Protein Catabolic Process (GO)	0.0832109	2.51748	1
Concordant Upregulated genes:104	Response to Retinoic Acid (GO)	0.0834238	4.30819	1
discordant genes:97	Cellular Response to Heat Stress (Re)	0.0834958	4.30525	1
discordant genes:97	G Alpha Q Signalling Events (Re)	0.0838216	3.01891	1
concordant Downregulated genes:28	Diseases of Glycosylation (Re)	0.0844206	12.4996	1
discordant genes:97	Divalent Inorganic Cation Homeostasis (GO)	0.084626	2.22565	1
Concordant Upregulated genes:104	ERBB1 Downstream Pathway (PI)	0.0847714	4.2669	1
Concordant Upregulated genes:104	Signaling By VEGF (Re)	0.0847714	4.2669	1
Concordant Upregulated genes:104	Response to Alcohol (GO)	0.0848087	3.00498	1
Concordant Upregulated genes:104	Protein Acylation (GO)	0.0856659	2.99152	1
Concordant Upregulated genes:104	Interleukin 4 and Interleukin 13 Signaling (Re)	0.0861256	4.2264	1
discordant genes:97	Post Golgi Vesicle Mediated Transport (GO)	0.0863345	4.2195	1
discordant genes:97	Tgfb Pathway (Bi)	0.0866449	11.7461	1
discordant genes:97	Hif1a Pathway (PI)	0.0866449	11.7461	1
discordant genes:97	Reflex (GO)	0.0866449	11.7461	1
discordant genes:97	Reg. of Delayed Rectifier Potassium Channel Activity (GO)	0.0866449	11.7461	1
discordant genes:97	Definitive Hemopoiesis (GO)	0.0866449	11.7461	1
discordant genes:97	Chrebp Pathway (Bi)	0.0866449	11.7461	1
discordant genes:97	LIS1 Pathway (Bi)	0.0866449	11.7461	1
discordant genes:97	Neg. Reg. of Phagocytosis (GO)	0.0866449	11.7461	1
discordant genes:97	Podosome Assembly (GO)	0.0866449	11.7461	1
discordant genes:97	Scavenging By Class a Receptors (Re)	0.0866449	11.7461	1
discordant genes:97	Ephrin Signaling (Re)	0.0866449	11.7461	1
discordant genes:97	Reg. of TP53 Activity Through Methylation (Re)	0.0866449	11.7461	1
Concordant Upregulated genes:104	Intermediate Filament Organization (GO)	0.0868452	11.6933	1
Concordant Upregulated genes:104	Mesenchymal to Epithelial Transition (GO)	0.0868452	11.6933	1
Concordant Upregulated genes:104	Tongue Development (GO)	0.0868452	11.6933	1
Concordant Upregulated genes:104	Ribonucleoside Catabolic Process (GO)	0.0868452	11.6933	1
Concordant Upregulated genes:104	Astrocyte Activation (GO)	0.0868452	11.6933	1
Concordant Upregulated genes:104	Reg. of Production of Small RNA Involved in Gene Silencing By RNA (GO)	0.0868452	11.6933	1
Concordant Upregulated genes:104	Neg. Reg. of Cardiocyte Differentiation (GO)	0.0868452	11.6933	1
Concordant Upregulated genes:104	Regulated Necrosis (Re)	0.0868452	11.6933	1
concordant Downregulated genes:28	Localization Within Membrane (GO)	0.0872915	12.0654	1
concordant Downregulated genes:28	Pos. Reg. of Cell Morphogenesis Involved in Differentiation (GO)	0.0872915	12.0654	1
Concordant Upregulated genes:104	ECM Regulators (Na)	0.0873915	2.96494	1
Concordant Upregulated genes:104	Reg. of Protein Localization to Nucleus (GO)	0.0874865	4.18667	1
concordant Downregulated genes:28	Hindbrain Development (GO)	0.0878647	11.9821	1
discordant genes:97	Neg. Reg. of Transcription By RNA Polymerase II (GO)	0.0891625	1.90643	1
discordant genes:97	TOR Signaling (GO)	0.0892021	4.13721	1
discordant genes:97	Reg. of Ion Transport (GO)	0.0900977	2.01596	1
Concordant Upregulated genes:104	Sprouting Angiogenesis (GO)	0.0902275	4.10915	1
concordant Downregulated genes:28	Monosaccharide Metabolic Process (GO)	0.0907259	11.5823	1
Concordant Upregulated genes:104	Ecadherin Keratinocyte Pathway (PI)	0.0909863	11.1099	1
Concordant Upregulated genes:104	Signal Transduction By L1 (Re)	0.0909863	11.1099	1
Concordant Upregulated genes:104	Embryonic Hemopoiesis (GO)	0.0909863	11.1099	1
Concordant Upregulated genes:104	Male Genitalia Development (GO)	0.0909863	11.1099	1
Concordant Upregulated genes:104	Pos. Reg. of Signal Transduction By P53 Class Mediator (GO)	0.0909863	11.1099	1
Concordant Upregulated genes:104	Spermatid Nucleus Differentiation (GO)	0.0909863	11.1099	1
Concordant Upregulated genes:104	Cellular Response to Zinc Ion (GO)	0.0909863	11.1099	1
Concordant Upregulated genes:104	Cellular Response to dsRNA (GO)	0.0909863	11.1099	1
Concordant Upregulated genes:104	Reg. of Myoblast Fusion (GO)	0.0909863	11.1099	1
Concordant Upregulated genes:104	Basement Membrane Organization (GO)	0.0909863	11.1099	1
Concordant Upregulated genes:104	Base Conversion or Substitution Editing (GO)	0.0909863	11.1099	1
Concordant Upregulated genes:104	CD209 Dc Sign Signaling (Re)	0.0909863	11.1099	1
discordant genes:97	Csk Pathway (Bi)	0.0909937	11.1291	1
discordant genes:97	Cytoplasmic mRNA Processing Body Assembly (GO)	0.0909937	11.1291	1
discordant genes:97	Barbed End Actin Filament Capping (GO)	0.0909937	11.1291	1
discordant genes:97	Reg. of Protein Homooligomerization (GO)	0.0909937	11.1291	1
discordant genes:97	Histone H4 K16 Acetylation (GO)	0.0909937	11.1291	1
discordant genes:97	Reg. of Viral Induced Cytoplasmic Pattern Recognition Receptor Signaling Pathway (GO)	0.0909937	11.1291	1
discordant genes:97	Adaptation of Signaling Pathway (GO)	0.0909937	11.1291	1
discordant genes:97	Reg. of Bicellular Tight Junction Assembly (GO)	0.0909937	11.1291	1
discordant genes:97	TP53 Regulates Transcription of Genes Involved in Cytochrome C Release (Re)	0.0909937	11.1291	1
discordant genes:97	NOTCH4 Intracellular Domain Regulates Transcription (Re)	0.0909937	11.1291	1
Concordant Upregulated genes:104	Reg. of Gliogenesis (GO)	0.0916076	4.0718	1
Concordant Upregulated genes:104	Signaling By Nuclear Receptors (Re)	0.0917698	2.90049	1
discordant genes:97	Golgi Vesicle Transport (GO)	0.0918368	2.42534	1
concordant Downregulated genes:28	Non Canonical WNT Signaling Pathway (GO)	0.0918681	11.4297	1
discordant genes:97	ERBB1 Downstream Pathway (PI)	0.092098	4.05781	1
discordant genes:97	Signaling By VEGF (Re)	0.092098	4.05781	1
Concordant Upregulated genes:104	Carbohydrate Homeostasis (GO)	0.0926563	2.88793	1
discordant genes:97	Response to Amino Acid (GO)	0.0935562	4.01973	1
discordant genes:97	Reg. of Protein Complex Disassembly (GO)	0.0935562	4.01973	1
concordant Downregulated genes:28	Cytokine Signaling in Immune System (Re)	0.0938883	4.44635	1
discordant genes:97	Lipid Modification (GO)	0.0938981	2.86887	1
concordant Downregulated genes:28	Postsynapse Organization (GO)	0.0941485	11.1373	1
Concordant Upregulated genes:104	Renal System Process (GO)	0.0943863	3.99866	1
discordant genes:97	Neg. Reg. of Cellular Protein Localization (GO)	0.0950212	3.98157	1
discordant genes:97	Autophagy (Re)	0.0950212	3.98157	1
Concordant Upregulated genes:104	AKT Pathway (Bi)	0.0951088	10.5807	1
Concordant Upregulated genes:104	Initial Triggering of Complement (Re)	0.0951088	10.5807	1
Concordant Upregulated genes:104	Natural Killer Cell Differentiation (GO)	0.0951088	10.5807	1
Concordant Upregulated genes:104	Reg. of Chromatin Binding (GO)	0.0951088	10.5807	1
Concordant Upregulated genes:104	Decidualization (GO)	0.0951088	10.5807	1
Concordant Upregulated genes:104	Neuronal Stem Cell Population Maintenance (GO)	0.0951088	10.5807	1
Concordant Upregulated genes:104	Pos. Reg. of Myoblast Differentiation (GO)	0.0951088	10.5807	1
Concordant Upregulated genes:104	Reg. of Metanephros Development (GO)	0.0951088	10.5807	1
Concordant Upregulated genes:104	L Glutamate Transmembrane Transport (GO)	0.0951088	10.5807	1
Concordant Upregulated genes:104	SHC1 Events in ERBB2 Signaling (Re)	0.0951088	10.5807	1
Concordant Upregulated genes:104	Response to Inorganic Substance (GO)	0.0952595	2.14457	1
concordant Downregulated genes:28	Fertilization (GO)	0.0952868	10.9982	1
discordant genes:97	Il6 Pathway (Bi)	0.095322	10.5724	1
discordant genes:97	RHO Pathway (Bi)	0.095322	10.5724	1
discordant genes:97	CTLA4 Inhibitory Signaling (Re)	0.095322	10.5724	1
discordant genes:97	Glutamine Metabolic Process (GO)	0.095322	10.5724	1
discordant genes:97	Chromatin Disassembly (GO)	0.095322	10.5724	1
discordant genes:97	Ovulation (GO)	0.095322	10.5724	1
discordant genes:97	Endoplasmic Reticulum Calcium Ion Homeostasis (GO)	0.095322	10.5724	1
discordant genes:97	PERK Mediated Unfolded Protein Response (GO)	0.095322	10.5724	1
discordant genes:97	VEGFR2 Mediated Cell Proliferation (Re)	0.095322	10.5724	1
discordant genes:97	CD209 Dc Sign Signaling (Re)	0.095322	10.5724	1
discordant genes:97	Blood Group Systems Biosynthesis (Re)	0.095322	10.5724	1
Concordant Upregulated genes:104	Erythrocyte Homeostasis (GO)	0.0957849	3.96305	1
Concordant Upregulated genes:104	Reg. of B-Cell Activation (GO)	0.0957849	3.96305	1
Concordant Upregulated genes:104	Import Across Plasma Membrane (GO)	0.0957849	3.96305	1
Concordant Upregulated genes:104	Immune Response Regulating Cell Surface Receptor Signaling Pathway (GO)	0.0965808	2.38219	1
Concordant Upregulated genes:104	Heart Development (GO)	0.0969787	2.13215	1
discordant genes:97	Pos. Reg. of Nervous System Development (GO)	0.0974827	2.12643	1
concordant Downregulated genes:28	Sensory Perception of Mechanical Stimulus (GO)	0.0981267	10.6556	1
Concordant Upregulated genes:104	Pos. Reg. of Cell Substrate Adhesion (GO)	0.0985999	3.89371	1
concordant Downregulated genes:28	ECM Affiliated (Na)	0.0986938	10.5907	1
concordant Downregulated genes:28	Reg. of Cellular Localization (GO)	0.0987101	4.31148	1
Concordant Upregulated genes:104	Her2 Pathway (Bi)	0.0992128	10.0965	1
Concordant Upregulated genes:104	Modified Amino Acid Transport (GO)	0.0992128	10.0965	1
Concordant Upregulated genes:104	Glutamate Metabolic Process (GO)	0.0992128	10.0965	1
Concordant Upregulated genes:104	Endocardial Cushion Formation (GO)	0.0992128	10.0965	1
Concordant Upregulated genes:104	Muscle Hypertrophy in Response to Stress (GO)	0.0992128	10.0965	1
discordant genes:97	Oocyte Meiosis (KG)	0.0994558	3.87235	1
discordant genes:97	IL2 Pathway (Bi)	0.09963	10.0661	1
discordant genes:97	Nthi Pathway (Bi)	0.09963	10.0661	1
discordant genes:97	Pdgfra Pathway (PI)	0.09963	10.0661	1
discordant genes:97	Dopamine Neurotransmitter Release Cycle (Re)	0.09963	10.0661	1
discordant genes:97	Nitric Oxide Stimulates Guanylate Cyclase (Re)	0.09963	10.0661	1
discordant genes:97	Aspartate Family Amino Acid Biosynthetic Process (GO)	0.09963	10.0661	1
discordant genes:97	Pos. Reg. of Antigen Receptor Mediated Signaling Pathway (GO)	0.09963	10.0661	1
discordant genes:97	Neg. Reg. of Lyase Activity (GO)	0.09963	10.0661	1
discordant genes:97	Motile Cilium Assembly (GO)	0.09963	10.0661	1
discordant genes:97	Integrin Activation (GO)	0.09963	10.0661	1
discordant genes:97	Peptidyl Lysine Modification (GO)	0.0998049	2.35103	1
Concordant Upregulated genes:104	Gland Morphogenesis (GO)	0.100016	3.85993	1
discordant genes:97	DNA Templated Transcription Initiation (GO)	0.10056	2.78084	1
Concordant Upregulated genes:104	Diseases of Signal Transduction (Re)	0.100779	2.34437	1
discordant genes:97	B-Cell Mediated Immunity (GO)	0.100947	3.83727	1
concordant Downregulated genes:28	Sulfur Compound Biosynthetic Process (GO)	0.100959	10.3384	1
concordant Downregulated genes:28	Reg. of Cell Size (GO)	0.101524	10.2771	1
discordant genes:97	Reg. of Stem Cell Differentiation (GO)	0.102444	3.80281	1
discordant genes:97	Reg. of Synaptic Vesicle Cycle (GO)	0.102444	3.80281	1
concordant Downregulated genes:28	Reg. of Cellular Component Biogenesis (GO)	0.102622	4.20909	1
concordant Downregulated genes:28	Pos. Reg. of Apoptotic Signaling Pathway (GO)	0.102654	10.1566	1
Concordant Upregulated genes:104	Dorso Ventral Axis Formation (KG)	0.103299	9.65843	1
Concordant Upregulated genes:104	CTCF Pathway (Bi)	0.103299	9.65843	1
Concordant Upregulated genes:104	Nkt Pathway (Bi)	0.103299	9.65843	1
Concordant Upregulated genes:104	Signaling By EGFR in Cancer (Re)	0.103299	9.65843	1
Concordant Upregulated genes:104	Modulation By Host of Viral Process (GO)	0.103299	9.65843	1
Concordant Upregulated genes:104	Neg. Reg. of Actin Filament Bundle Assembly (GO)	0.103299	9.65843	1
Concordant Upregulated genes:104	Amelogenesis (GO)	0.103299	9.65843	1
Concordant Upregulated genes:104	Response to Lead Ion (GO)	0.103299	9.65843	1
Concordant Upregulated genes:104	Protein Localization to Endosome (GO)	0.103299	9.65843	1
Concordant Upregulated genes:104	Pos. Reg. of Posttranscriptional Gene Silencing (GO)	0.103299	9.65843	1
Concordant Upregulated genes:104	Secondary Palate Development (GO)	0.103299	9.65843	1
Concordant Upregulated genes:104	RHO Gtpases Activate NADPH Oxidases (Re)	0.103299	9.65843	1
Concordant Upregulated genes:104	Estrogen Dependent Nuclear Events Downstream of Esr Membrane Signaling (Re)	0.103299	9.65843	1
Concordant Upregulated genes:104	Cell Fate Commitment (GO)	0.10357	2.7451	1
concordant Downregulated genes:28	Protein Localization to Organelle (GO)	0.103607	4.18421	1
concordant Downregulated genes:28	Synapse Assembly (GO)	0.103782	10.0374	1
discordant genes:97	Nitrogen Metabolism (KG)	0.103918	9.60929	1
discordant genes:97	Intrinsic Pathway (Bi)	0.103918	9.60929	1
discordant genes:97	Termination of O Glycan Biosynthesis (Re)	0.103918	9.60929	1
discordant genes:97	Motor Neuron Axon Guidance (GO)	0.103918	9.60929	1
discordant genes:97	Reg. of Homotypic Cell Cell Adhesion (GO)	0.103918	9.60929	1
discordant genes:97	Nucleotide Sugar Biosynthetic Process (GO)	0.103918	9.60929	1
discordant genes:97	Axonal Fasciculation (GO)	0.103918	9.60929	1
discordant genes:97	B-Cell Apoptotic Process (GO)	0.103918	9.60929	1
discordant genes:97	Cd8 Pos. Alpha Beta T-Cell Activation (GO)	0.103918	9.60929	1
discordant genes:97	Mitochondrial Depolarization (GO)	0.103918	9.60929	1
discordant genes:97	Inclusion Body Assembly (GO)	0.103918	9.60929	1
discordant genes:97	Nephrin Family Interactions (Re)	0.103918	9.60929	1
discordant genes:97	Reg. of B-Cell Activation (GO)	0.103948	3.76897	1
concordant Downregulated genes:28	Carbohydrate Derivative Catabolic Process (GO)	0.10491	9.92086	1
Concordant Upregulated genes:104	Small GTPase Mediated Signal Transduction (GO)	0.105211	2.0759	1
concordant Downregulated genes:28	Central Nervous System Neuron Differentiation (GO)	0.106036	9.81322	1
concordant Downregulated genes:28	Reg. of Proteasomal Protein Catabolic Process (GO)	0.106036	9.81322	1
concordant Downregulated genes:28	Reg. of Axonogenesis (GO)	0.106036	9.81322	1
concordant Downregulated genes:28	Reg. of Protein Localization to Membrane (GO)	0.106036	9.81322	1
concordant Downregulated genes:28	Programmed Cell Death (Re)	0.106598	9.75747	1
discordant genes:97	Peptidyl Threonine Modification (GO)	0.106973	3.70308	1
discordant genes:97	Pos. Reg. of Cell Substrate Adhesion (GO)	0.106973	3.70308	1
concordant Downregulated genes:28	Signal Transduction By Protein Phosphorylation (GO)	0.107178	4.09695	1
Concordant Upregulated genes:104	SLC Mediated Transmembrane Transport (Re)	0.107318	2.70059	1
Concordant Upregulated genes:104	Tff Pathway (Bi)	0.107366	9.25768	1
Concordant Upregulated genes:104	ALK1 Pathway (PI)	0.107366	9.25768	1
Concordant Upregulated genes:104	Basigin Interactions (Re)	0.107366	9.25768	1
Concordant Upregulated genes:104	Reg. of Response to Extracellular Stimulus (GO)	0.107366	9.25768	1
Concordant Upregulated genes:104	Response to Angiotensin (GO)	0.107366	9.25768	1
Concordant Upregulated genes:104	Carbohydrate Phosphorylation (GO)	0.107366	9.25768	1
Concordant Upregulated genes:104	Cell Differentiation Involved in Embryonic Placenta Development (GO)	0.107366	9.25768	1
Concordant Upregulated genes:104	Guanosine Containing Compound Metabolic Process (GO)	0.107366	9.25768	1
Concordant Upregulated genes:104	Reg. of Androgen Receptor Signaling Pathway (GO)	0.107366	9.25768	1
Concordant Upregulated genes:104	Morphogenesis of An Epithelial Fold (GO)	0.107366	9.25768	1
Concordant Upregulated genes:104	Amino Acid Import (GO)	0.107366	9.25768	1
Concordant Upregulated genes:104	Subpallium Development (GO)	0.107366	9.25768	1
Concordant Upregulated genes:104	Cytokine Production (GO)	0.107756	1.91533	1
discordant genes:97	Protein Export (KG)	0.108185	9.19254	1
discordant genes:97	Vdr Pathway (Bi)	0.108185	9.19254	1
discordant genes:97	Hyperosmotic Response (GO)	0.108185	9.19254	1
discordant genes:97	Neg. Reg. of Actin Filament Bundle Assembly (GO)	0.108185	9.19254	1
discordant genes:97	Reg. of Establishment or Maintenance of Cell Polarity (GO)	0.108185	9.19254	1
discordant genes:97	Neg. Reg. of Peptidyl Serine Phosphorylation (GO)	0.108185	9.19254	1
discordant genes:97	Synapse Maturation (GO)	0.108185	9.19254	1
concordant Downregulated genes:28	Carbohydrate Derivative Metabolic Process (GO)	0.108776	4.05927	1
Concordant Upregulated genes:104	Neg. Reg. of Cytokine Production (GO)	0.109212	2.67886	1
Concordant Upregulated genes:104	Neurotransmitter Metabolic Process (GO)	0.110087	3.63907	1
Concordant Upregulated genes:104	Galactose Metabolism (KG)	0.111415	8.88555	1
Concordant Upregulated genes:104	Tolerance Induction (GO)	0.111415	8.88555	1
Concordant Upregulated genes:104	Cell Differentiation Involved in Metanephros Development (GO)	0.111415	8.88555	1
Concordant Upregulated genes:104	Response to Increased Oxygen Levels (GO)	0.111415	8.88555	1
Concordant Upregulated genes:104	Neg. Reg. of Cartilage Development (GO)	0.111415	8.88555	1
Concordant Upregulated genes:104	Monovalent Inorganic Anion Homeostasis (GO)	0.111415	8.88555	1
Concordant Upregulated genes:104	Inactivation of MAPK Activity (GO)	0.111415	8.88555	1
Concordant Upregulated genes:104	Transposition (GO)	0.111415	8.88555	1
Concordant Upregulated genes:104	Neuron Death in Response to Oxidative Stress (GO)	0.111415	8.88555	1
Concordant Upregulated genes:104	Serine Phosphorylation of STAT Protein (GO)	0.111415	8.88555	1
Concordant Upregulated genes:104	Glycolytic Process Through Fructose 6 Phosphate (GO)	0.111415	8.88555	1
Concordant Upregulated genes:104	WNT Ligand Biogenesis and Trafficking (Re)	0.111415	8.88555	1
Concordant Upregulated genes:104	Constitutive Signaling By AKT1 E17K in Cancer (Re)	0.111415	8.88555	1
discordant genes:97	Cell Cell Junction Assembly (GO)	0.111555	3.6085	1
discordant genes:97	Glycosphingolipid Biosynthesis Lacto and Neolacto Series (KG)	0.112433	8.80814	1
discordant genes:97	Lymph Angiogenesis Pathway (PI)	0.112433	8.80814	1
discordant genes:97	Reg. of Androgen Receptor Signaling Pathway (GO)	0.112433	8.80814	1
discordant genes:97	Phosphatidylserine Metabolic Process (GO)	0.112433	8.80814	1
discordant genes:97	Reg. of Endoplasmic Reticulum Unfolded Protein Response (GO)	0.112433	8.80814	1
discordant genes:97	snRNA Processing (GO)	0.112433	8.80814	1
discordant genes:97	Subpallium Development (GO)	0.112433	8.80814	1
discordant genes:97	Pos. Reg. of Cilium Assembly (GO)	0.112433	8.80814	1
discordant genes:97	Neurotransmitter Receptor Internalization (GO)	0.112433	8.80814	1
discordant genes:97	Reg. of AMPA Receptor Activity (GO)	0.112433	8.80814	1
concordant Downregulated genes:28	Metabolism of Vitamins and Cofactors (Re)	0.112764	9.18563	1
Concordant Upregulated genes:104	Immunoregulatory Interactions Between a Lymphoid and a Non Lymphoid Cell (Re)	0.113012	3.58057	1
Concordant Upregulated genes:104	Odontogenesis (GO)	0.113012	3.58057	1
Concordant Upregulated genes:104	Pos. Reg. of Ion Transport (GO)	0.113038	2.63642	1
Concordant Upregulated genes:104	Striated Muscle Cell Differentiation (GO)	0.114003	2.62601	1
Concordant Upregulated genes:104	Neg. Reg. of Transferase Activity (GO)	0.114003	2.62601	1
Concordant Upregulated genes:104	Neg. Reg. of Protein Serine Threonine Kinase Activity (GO)	0.114483	3.55126	1
discordant genes:97	Transcriptional Reg. By RUNX2 (Re)	0.114638	3.54734	1
concordant Downregulated genes:28	Locomotory Behavior (GO)	0.114997	8.99399	1
Concordant Upregulated genes:104	At1r Pathway (Bi)	0.115446	8.54325	1
Concordant Upregulated genes:104	Inflam Pathway (Bi)	0.115446	8.54325	1
Concordant Upregulated genes:104	ERK Pathway (Bi)	0.115446	8.54325	1
Concordant Upregulated genes:104	Glypican 1pathway (PI)	0.115446	8.54325	1
Concordant Upregulated genes:104	Signaling By BMP (Re)	0.115446	8.54325	1
Concordant Upregulated genes:104	Outflow Tract Septum Morphogenesis (GO)	0.115446	8.54325	1
Concordant Upregulated genes:104	Metanephric Epithelium Development (GO)	0.115446	8.54325	1
Concordant Upregulated genes:104	Ventricular System Development (GO)	0.115446	8.54325	1
Concordant Upregulated genes:104	Reg. of Fatty Acid Transport (GO)	0.115446	8.54325	1
Concordant Upregulated genes:104	Response to Thyroid Hormone (GO)	0.115446	8.54325	1
Concordant Upregulated genes:104	Peptide Catabolic Process (GO)	0.115446	8.54325	1
Concordant Upregulated genes:104	Endothelial Cell Chemotaxis (GO)	0.115446	8.54325	1
Concordant Upregulated genes:104	Caspase Activation Via Extrinsic Apoptotic Signalling Pathway (Re)	0.115446	8.54325	1
Concordant Upregulated genes:104	Anion Transmembrane Transport (GO)	0.115942	2.60545	1
concordant Downregulated genes:28	Sulfur Compound Metabolic Process (GO)	0.116111	8.90264	1
Concordant Upregulated genes:104	Endomembrane System Organization (GO)	0.116129	2.2208	1
discordant genes:97	Phospholipid Metabolic Process (GO)	0.116472	2.59832	1
discordant genes:97	Integrin Cs Pathway (PI)	0.11666	8.45632	1
discordant genes:97	N Glycan Antennae Elongation in The Medial Trans Golgi (Re)	0.11666	8.45632	1
discordant genes:97	Dendritic Cell Migration (GO)	0.11666	8.45632	1
discordant genes:97	Dopamine Metabolic Process (GO)	0.11666	8.45632	1
discordant genes:97	Fluid Transport (GO)	0.11666	8.45632	1
discordant genes:97	Neuron Death in Response to Oxidative Stress (GO)	0.11666	8.45632	1
discordant genes:97	Reg. of Synaptic Vesicle Recycling (GO)	0.11666	8.45632	1
concordant Downregulated genes:28	Multicellular Organismal Signaling (GO)	0.116668	8.85363	1
concordant Downregulated genes:28	Pos. Reg. of Intracellular Signal Transduction (GO)	0.116669	3.8847	1
concordant Downregulated genes:28	Reg. of Protein Localization (GO)	0.117079	3.87613	1
Concordant Upregulated genes:104	Response to Hydrogen Peroxide (GO)	0.117438	3.49556	1
discordant genes:97	Reg. of Embryonic Development (GO)	0.117743	3.48899	1
Concordant Upregulated genes:104	G1 Pathway (Bi)	0.119459	8.22638	1
Concordant Upregulated genes:104	WNT Signaling Pathway (PI)	0.119459	8.22638	1
Concordant Upregulated genes:104	Neg. Reg. of DNA Repair (GO)	0.119459	8.22638	1
Concordant Upregulated genes:104	Pos. Reg. of Transcription From RNA Polymerase II Promoter in Response to Stress (GO)	0.119459	8.22638	1
Concordant Upregulated genes:104	Cell Volume Homeostasis (GO)	0.119459	8.22638	1
Concordant Upregulated genes:104	Pos. Reg. of Lamellipodium Organization (GO)	0.119459	8.22638	1
Concordant Upregulated genes:104	Aortic Valve Development (GO)	0.119459	8.22638	1
Concordant Upregulated genes:104	Interleukin 8 Secretion (GO)	0.119459	8.22638	1
Concordant Upregulated genes:104	Adrenaline Noradrenaline Inhibits Insulin Secretion (Re)	0.119459	8.22638	1
concordant Downregulated genes:28	Pos. Reg. of Intracellular Transport (GO)	0.120002	8.59015	1
Concordant Upregulated genes:104	Pos. Reg. of Leukocyte Proliferation (GO)	0.120413	3.44154	1
Concordant Upregulated genes:104	Pos. Reg. of Inflammatory Response (GO)	0.120413	3.44154	1
discordant genes:97	Protein Kinase C Activating G Protein Coupled Receptor Signaling Pathway (GO)	0.120868	8.12785	1
discordant genes:97	Protein Kinase C Signaling (GO)	0.120868	8.12785	1
discordant genes:97	Inner Ear Receptor Cell Stereocilium Organization (GO)	0.120868	8.12785	1
discordant genes:97	Synaptic Membrane Adhesion (GO)	0.120868	8.12785	1
discordant genes:97	Neg. Reg. of Response to Drug (GO)	0.120868	8.12785	1
discordant genes:97	Bmal1:Clock Npas2 Activates Circadian Gene Expression (Re)	0.120868	8.12785	1
discordant genes:97	Role of Phospholipids in Phagocytosis (Re)	0.120868	8.12785	1
discordant genes:97	Protein Catabolic Process (GO)	0.121326	1.75418	1
concordant Downregulated genes:28	Cyclic Nucleotide Mediated Signaling (GO)	0.122218	8.42333	1
discordant genes:97	Neg. Reg. of Protein Complex Assembly (GO)	0.122441	3.4048	1
discordant genes:97	Action Potential (GO)	0.122441	3.4048	1
concordant Downregulated genes:28	Calcium Mediated Signaling (GO)	0.123324	8.34181	1
Concordant Upregulated genes:104	Actin Filament Based Movement (GO)	0.123407	3.38901	1
Concordant Upregulated genes:104	Reg. of Peptidyl Serine Phosphorylation (GO)	0.123407	3.38901	1
Concordant Upregulated genes:104	Transition Metal Ion Homeostasis (GO)	0.123407	3.38901	1
Concordant Upregulated genes:104	HDAC Classiii Pathway (PI)	0.123454	7.93237	1
Concordant Upregulated genes:104	Integrin2 Pathway (PI)	0.123454	7.93237	1
Concordant Upregulated genes:104	Platelet Calcium Homeostasis (Re)	0.123454	7.93237	1
Concordant Upregulated genes:104	Potassium Ion Homeostasis (GO)	0.123454	7.93237	1
Concordant Upregulated genes:104	Cartilage Morphogenesis (GO)	0.123454	7.93237	1
Concordant Upregulated genes:104	Relaxation of Muscle (GO)	0.123454	7.93237	1
Concordant Upregulated genes:104	Nitric Oxide Mediated Signal Transduction (GO)	0.123454	7.93237	1
Concordant Upregulated genes:104	Myeloid Dendritic Cell Activation (GO)	0.123454	7.93237	1
Concordant Upregulated genes:104	Erythrocyte Development (GO)	0.123454	7.93237	1
discordant genes:97	Chromatin Organization (GO)	0.123642	1.83532	1
Concordant Upregulated genes:104	Reg. of Histone Modification (GO)	0.12491	3.36334	1
Concordant Upregulated genes:104	Pos. Reg. of JNK Cascade (GO)	0.12491	3.36334	1
concordant Downregulated genes:28	Sodium Ion Transport (GO)	0.124981	8.22242	1
discordant genes:97	Carm ER Pathway (Bi)	0.125056	7.82846	1
discordant genes:97	PDGF Pathway (Bi)	0.125056	7.82846	1
discordant genes:97	NOTCH HLH Transcription Pathway (Re)	0.125056	7.82846	1
discordant genes:97	TRAF6 Mediated IRF7 Activation (Re)	0.125056	7.82846	1
discordant genes:97	Pos. Reg. of Cellular Response to Transforming Growth Factor Beta Stimulus (GO)	0.125056	7.82846	1
discordant genes:97	Startle Response (GO)	0.125056	7.82846	1
discordant genes:97	Cell Communication By Electrical Coupling (GO)	0.125056	7.82846	1
discordant genes:97	Response to Gonadotropin (GO)	0.125056	7.82846	1
discordant genes:97	Microautophagy (Re)	0.125056	7.82846	1
discordant genes:97	Pos. Reg. of Protein Polymerization (GO)	0.125598	3.3508	1
Concordant Upregulated genes:104	Response to Biotic Stimulus (GO)	0.126339	1.73648	1
Concordant Upregulated genes:104	Reg. of Epithelial Cell Differentiation (GO)	0.126419	3.33805	1
Concordant Upregulated genes:104	Insulin Receptor Signaling Pathway (GO)	0.126419	3.33805	1
Concordant Upregulated genes:104	Cellular Response to Antibiotic (GO)	0.126419	3.33805	1
discordant genes:97	Cell Adhesion Molecules Cams (KG)	0.127184	3.32444	1
discordant genes:97	Cell Cell Communication (Re)	0.127184	3.32444	1
Concordant Upregulated genes:104	Pos. Reg. of Vasoconstriction (GO)	0.127431	7.65862	1
Concordant Upregulated genes:104	Tetrapyrrole Metabolic Process (GO)	0.127431	7.65862	1
Concordant Upregulated genes:104	Pos. Reg. of Tissue Remodeling (GO)	0.127431	7.65862	1
Concordant Upregulated genes:104	Cellular Response to Vitamin (GO)	0.127431	7.65862	1
Concordant Upregulated genes:104	Reg. of Viral Entry Into Host Cell (GO)	0.127431	7.65862	1
Concordant Upregulated genes:104	Viral RNA Genome Replication (GO)	0.127431	7.65862	1
Concordant Upregulated genes:104	Laminin Interactions (Re)	0.127431	7.65862	1
Concordant Upregulated genes:104	MET Activates PTK2 Signaling (Re)	0.127431	7.65862	1
Concordant Upregulated genes:104	FOXO Mediated Transcription of Oxidative Stress Metabolic and Neuronal Genes (Re)	0.127431	7.65862	1
Concordant Upregulated genes:104	Insulin Signaling Pathway (KG)	0.127931	3.31313	1
Concordant Upregulated genes:104	Degradation of The Extracellular Matrix (Re)	0.127931	3.31313	1
Concordant Upregulated genes:104	Nephron Development (GO)	0.127931	3.31313	1
discordant genes:97	Reg. of Neurological System Process (GO)	0.128774	3.29848	1
discordant genes:97	Reg. of Response to Biotic Stimulus (GO)	0.128774	3.29848	1
discordant genes:97	HDAC Classiii Pathway (PI)	0.129224	7.54873	1
discordant genes:97	IGF1 Pathway (PI)	0.129224	7.54873	1
discordant genes:97	Platelet Calcium Homeostasis (Re)	0.129224	7.54873	1
discordant genes:97	Synaptic Transmission Cholinergic (GO)	0.129224	7.54873	1
discordant genes:97	Neg. Reg. of Calcium Mediated Signaling (GO)	0.129224	7.54873	1
discordant genes:97	N Terminal Protein Amino Acid Modification (GO)	0.129224	7.54873	1
discordant genes:97	Branching Involved in Blood Vessel Morphogenesis (GO)	0.129224	7.54873	1
concordant Downregulated genes:28	Developmental Growth Involved in Morphogenesis (GO)	0.129935	7.88384	1
discordant genes:97	Signal Transduction By P53 Class Mediator (GO)	0.130055	2.46664	1
discordant genes:97	Pos. Reg. of Leukocyte Proliferation (GO)	0.13037	3.27292	1
Concordant Upregulated genes:104	Pos. Reg. of Transport (GO)	0.130488	1.72068	1
Concordant Upregulated genes:104	Amino Acid Transport (GO)	0.130969	3.26439	1
Concordant Upregulated genes:104	Tumor Necrosis Factor Superfamily Cytokine Production (GO)	0.130969	3.26439	1
Concordant Upregulated genes:104	Lens Fiber Cell Differentiation (GO)	0.13139	7.40329	1
Concordant Upregulated genes:104	Neg. Reg. of Blood Vessel Endothelial Cell Migration (GO)	0.13139	7.40329	1
Concordant Upregulated genes:104	Reg. of Endothelial Cell Differentiation (GO)	0.13139	7.40329	1
Concordant Upregulated genes:104	DNA Dealkylation (GO)	0.13139	7.40329	1
Concordant Upregulated genes:104	Reg. of DNA Damage Response Signal Transduction By P53 Class Mediator (GO)	0.13139	7.40329	1
Concordant Upregulated genes:104	Reg. of Astrocyte Differentiation (GO)	0.13139	7.40329	1
Concordant Upregulated genes:104	Response to Pain (GO)	0.13139	7.40329	1
Concordant Upregulated genes:104	Respiratory Burst (GO)	0.13139	7.40329	1
Concordant Upregulated genes:104	Homeostasis of Number of Cells Within a Tissue (GO)	0.13139	7.40329	1
Concordant Upregulated genes:104	Pos. Reg. of Peptidyl Lysine Acetylation (GO)	0.13139	7.40329	1
Concordant Upregulated genes:104	G Protein Beta:Gamma Signalling (Re)	0.13139	7.40329	1
Concordant Upregulated genes:104	Disassembly of The Destruction Complex and Recruitment of AXIN to The Membrane (Re)	0.13139	7.40329	1
Concordant Upregulated genes:104	RUNX2 Regulates Bone Development (Re)	0.13139	7.40329	1
concordant Downregulated genes:28	Reg. of Cysteine Type Endopeptidase Activity (GO)	0.13158	7.77708	1
discordant genes:97	Ubiquitin Mediated Proteolysis (KG)	0.13197	3.24775	1
discordant genes:97	Extracellular Structure Organization (GO)	0.132178	2.10921	1
Concordant Upregulated genes:104	Response to Fibroblast Growth Factor (GO)	0.132495	3.24055	1
Concordant Upregulated genes:104	Neg. Reg. of Immune Response (GO)	0.132495	3.24055	1
discordant genes:97	FAS Pathway (Bi)	0.133372	7.28851	1
discordant genes:97	CD40 Pathway (PI)	0.133372	7.28851	1
discordant genes:97	Nectin Pathway (PI)	0.133372	7.28851	1
discordant genes:97	Retinoic Acid Pathway (PI)	0.133372	7.28851	1
discordant genes:97	Ephrinb Rev Pathway (PI)	0.133372	7.28851	1
discordant genes:97	Cellular Response to Lipoprotein Particle Stimulus (GO)	0.133372	7.28851	1
discordant genes:97	Long Term Synaptic Depression (GO)	0.133372	7.28851	1
discordant genes:97	Exit From Mitosis (GO)	0.133372	7.28851	1
discordant genes:97	Pos. Reg. of Tissue Remodeling (GO)	0.133372	7.28851	1
discordant genes:97	Beta Catenin TCF Complex Assembly (GO)	0.133372	7.28851	1
discordant genes:97	Protein Kinase a Signaling (GO)	0.133372	7.28851	1
discordant genes:97	Laminin Interactions (Re)	0.133372	7.28851	1
discordant genes:97	Mitophagy (Re)	0.133372	7.28851	1
Concordant Upregulated genes:104	Reg. of Secretion (GO)	0.133476	1.79448	1
Concordant Upregulated genes:104	Diseases of Glycosylation (Re)	0.134024	3.21706	1
discordant genes:97	Alpha Beta T-Cell Activation (GO)	0.135184	3.19854	1
Concordant Upregulated genes:104	WNT Noncanonical Pathway (PI)	0.135332	7.16465	1
Concordant Upregulated genes:104	Netrin Pathway (PI)	0.135332	7.16465	1
Concordant Upregulated genes:104	Signal Amplification (Re)	0.135332	7.16465	1
Concordant Upregulated genes:104	Activation of Kainate Receptors Upon Glutamate Binding (Re)	0.135332	7.16465	1
Concordant Upregulated genes:104	Reg. of Vascular Endothelial Growth Factor Receptor Signaling Pathway (GO)	0.135332	7.16465	1
Concordant Upregulated genes:104	Toll Like Receptor 4 Signaling Pathway (GO)	0.135332	7.16465	1
Concordant Upregulated genes:104	Cardiac Epithelial to Mesenchymal Transition (GO)	0.135332	7.16465	1
Concordant Upregulated genes:104	Rac Protein Signal Transduction (GO)	0.135332	7.16465	1
Concordant Upregulated genes:104	Receptor Catabolic Process (GO)	0.135332	7.16465	1
Concordant Upregulated genes:104	Purinergic Receptor Signaling Pathway (GO)	0.135332	7.16465	1
Concordant Upregulated genes:104	Myeloid Cell Apoptotic Process (GO)	0.135332	7.16465	1
Concordant Upregulated genes:104	Pos. Reg. of G Protein Coupled Receptor Signaling Pathway (GO)	0.135332	7.16465	1
Concordant Upregulated genes:104	Pos. Reg. of Morphogenesis of An Epithelium (GO)	0.135332	7.16465	1
discordant genes:97	Cell Cell Adhesion Via Plasma Membrane Adhesion Molecules (GO)	0.135423	2.41923	1
Concordant Upregulated genes:104	Membrane Fusion (GO)	0.135558	3.19389	1
Concordant Upregulated genes:104	Digestive System Development (GO)	0.135558	3.19389	1
Concordant Upregulated genes:104	Interleukin 1 Family Signaling (Re)	0.135558	3.19389	1
discordant genes:97	RHO Gtpases Activate Formins (Re)	0.136797	3.17449	1
Concordant Upregulated genes:104	Neg. Reg. of Catabolic Process (GO)	0.137029	2.40708	1
Concordant Upregulated genes:104	Response to Calcium Ion (GO)	0.137095	3.17106	1
Concordant Upregulated genes:104	Cofactor Metabolic Process (GO)	0.137277	2.07931	1
Concordant Upregulated genes:104	Anion Transport (GO)	0.13731	1.89654	1
discordant genes:97	Syndecan 4 Pathway (PI)	0.137501	7.04589	1
discordant genes:97	Aurora a Pathway (PI)	0.137501	7.04589	1
discordant genes:97	MAPK Targets Nuclear Events Mediated By MAP Kinases (Re)	0.137501	7.04589	1
discordant genes:97	Forebrain Neuron Development (GO)	0.137501	7.04589	1
discordant genes:97	Regulatory T-Cell Differentiation (GO)	0.137501	7.04589	1
discordant genes:97	Neg. Reg. of Protein Localization to Membrane (GO)	0.137501	7.04589	1
discordant genes:97	Pos. Reg. of Peptidyl Lysine Acetylation (GO)	0.137501	7.04589	1
discordant genes:97	PERK Regulates Gene Expression (Re)	0.137501	7.04589	1
discordant genes:97	Transcriptional Reg. of Pluripotent Stem Cells (Re)	0.137501	7.04589	1
discordant genes:97	Disassembly of The Destruction Complex and Recruitment of AXIN to The Membrane (Re)	0.137501	7.04589	1
discordant genes:97	RUNX2 Regulates Bone Development (Re)	0.137501	7.04589	1
discordant genes:97	Antigen Activates B-Cell Receptor BCR Leading to Generation of Second Messengers (Re)	0.137501	7.04589	1
discordant genes:97	Intracellular Receptor Signaling Pathway (GO)	0.137593	2.40087	1
discordant genes:97	Insulin Signaling Pathway (KG)	0.138415	3.1508	1
Concordant Upregulated genes:104	Protein Localization to Membrane (GO)	0.138678	1.88999	1
Concordant Upregulated genes:104	Agr Pathway (Bi)	0.139256	6.9382	1
Concordant Upregulated genes:104	Syndecan 2 Pathway (PI)	0.139256	6.9382	1
Concordant Upregulated genes:104	Glucagon Type Ligand Receptors (Re)	0.139256	6.9382	1
Concordant Upregulated genes:104	Reg. of Lamellipodium Assembly (GO)	0.139256	6.9382	1
Concordant Upregulated genes:104	Secretory Granule Organization (GO)	0.139256	6.9382	1
Concordant Upregulated genes:104	Reg. of Natural Killer Cell Activation (GO)	0.139256	6.9382	1
Concordant Upregulated genes:104	Liver Regeneration (GO)	0.139256	6.9382	1
Concordant Upregulated genes:104	Response to ATP (GO)	0.139256	6.9382	1
Concordant Upregulated genes:104	Apoptotic Process Involved in Development (GO)	0.139256	6.9382	1
Concordant Upregulated genes:104	Cell Surface Receptor Signaling Pathway Involved in Cell Cell Signaling (GO)	0.139364	1.88673	1
discordant genes:97	ERBB Signaling Pathway (GO)	0.140037	3.12745	1
discordant genes:97	Golgi Organization (GO)	0.140037	3.12745	1
Concordant Upregulated genes:104	Cell Recognition (GO)	0.140182	3.12635	1
Concordant Upregulated genes:104	Response to Radiation (GO)	0.140536	2.05982	1
discordant genes:97	Protein Containing Complex Localization (GO)	0.140869	2.37383	1
discordant genes:97	Alanine Aspartate and Glutamate Metabolism (KG)	0.14161	6.8163	1
discordant genes:97	WNT Noncanonical Pathway (PI)	0.14161	6.8163	1
discordant genes:97	Netrin Pathway (PI)	0.14161	6.8163	1
discordant genes:97	Nephrin Neph1 Pathway (PI)	0.14161	6.8163	1
discordant genes:97	Alpha Synuclein Pathway (PI)	0.14161	6.8163	1
discordant genes:97	TGF Beta Receptor Signaling Activates Smads (Re)	0.14161	6.8163	1
discordant genes:97	Reg. of Vascular Endothelial Growth Factor Receptor Signaling Pathway (GO)	0.14161	6.8163	1
discordant genes:97	Activation of Protein Kinase B Activity (GO)	0.14161	6.8163	1
discordant genes:97	FCERI Mediated MAPK Activation (Re)	0.14161	6.8163	1
discordant genes:97	RAF Activation (Re)	0.14161	6.8163	1
discordant genes:97	Reg. of Generation of Precursor Metabolites and Energy (GO)	0.141664	3.10444	1
discordant genes:97	Neg. Reg. of Ion Transport (GO)	0.141664	3.10444	1
Concordant Upregulated genes:104	Clathrin Mediated Endocytosis (Re)	0.141731	3.10446	1
Concordant Upregulated genes:104	Receptor Mediated Endocytosis (GO)	0.142235	2.36423	1
Concordant Upregulated genes:104	Response to Tumor Necrosis Factor (GO)	0.142235	2.36423	1
Concordant Upregulated genes:104	Fructose and Mannose Metabolism (KG)	0.143162	6.72858	1
Concordant Upregulated genes:104	Butanoate Metabolism (KG)	0.143162	6.72858	1
Concordant Upregulated genes:104	Hif2pathway (PI)	0.143162	6.72858	1
Concordant Upregulated genes:104	Keratan Sulfate Keratin Metabolism (Re)	0.143162	6.72858	1
Concordant Upregulated genes:104	Pos. Reg. of Blood Pressure (GO)	0.143162	6.72858	1
Concordant Upregulated genes:104	Energy Homeostasis (GO)	0.143162	6.72858	1
Concordant Upregulated genes:104	Cellular Response to Estradiol Stimulus (GO)	0.143162	6.72858	1
Concordant Upregulated genes:104	Protein Palmitoylation (GO)	0.143162	6.72858	1
Concordant Upregulated genes:104	Pos. Reg. of Organic Acid Transport (GO)	0.143162	6.72858	1
Concordant Upregulated genes:104	Neuronal Action Potential (GO)	0.143162	6.72858	1
Concordant Upregulated genes:104	Pos. Reg. of Cyclin Dependent Protein Kinase Activity (GO)	0.143162	6.72858	1
discordant genes:97	Hepaticobiliary System Development (GO)	0.143294	3.08177	1
discordant genes:97	Reg. of Postsynaptic Membrane Potential (GO)	0.143294	3.08177	1
concordant Downregulated genes:28	Cell Fate Commitment (GO)	0.144642	7.01393	1
concordant Downregulated genes:28	Reg. of Animal Organ Morphogenesis (GO)	0.144642	7.01393	1
Concordant Upregulated genes:104	Reg. of GTPase Activity (GO)	0.144655	2.03589	1
Concordant Upregulated genes:104	Response to Ionizing Radiation (GO)	0.144841	3.06158	1
Concordant Upregulated genes:104	Reg. of Reproductive Process (GO)	0.144841	3.06158	1
discordant genes:97	Protein Tetramerization (GO)	0.144929	3.05942	1
discordant genes:97	PTEN Regulation (Re)	0.144929	3.05942	1
discordant genes:97	Cd40pathwaymap (SG)	0.145701	6.60372	1
discordant genes:97	Il8 Cxcr2 Pathway (PI)	0.145701	6.60372	1
discordant genes:97	Integrin A4b1 Pathway (PI)	0.145701	6.60372	1
discordant genes:97	IL12 STAT4 Pathway (PI)	0.145701	6.60372	1
discordant genes:97	Response to Fluid Shear Stress (GO)	0.145701	6.60372	1
discordant genes:97	Pos. Reg. of Sodium Ion Transport (GO)	0.145701	6.60372	1
discordant genes:97	Reg. of Lamellipodium Assembly (GO)	0.145701	6.60372	1
discordant genes:97	Response to ATP (GO)	0.145701	6.60372	1
discordant genes:97	Anoikis (GO)	0.145701	6.60372	1
discordant genes:97	FCERI Mediated Caplus2 Mobilization (Re)	0.145701	6.60372	1
discordant genes:97	Sialic Acid Metabolism (Re)	0.145701	6.60372	1
Concordant Upregulated genes:104	Arf6 Pathway (PI)	0.147051	6.53072	1
Concordant Upregulated genes:104	Pi3kci AKT Pathway (PI)	0.147051	6.53072	1
Concordant Upregulated genes:104	Proteoglycans (Na)	0.147051	6.53072	1
Concordant Upregulated genes:104	Movement in Environment of Other Organism Involved in Symbiotic Interaction (GO)	0.147051	6.53072	1
Concordant Upregulated genes:104	Cytochrome Complex Assembly (GO)	0.147051	6.53072	1
Concordant Upregulated genes:104	Neg. Reg. of Extrinsic Apoptotic Signaling Pathway Via Death Domain Receptors (GO)	0.147051	6.53072	1
Concordant Upregulated genes:104	Reg. of Cofactor Metabolic Process (GO)	0.147051	6.53072	1
Concordant Upregulated genes:104	Myotube Cell Development (GO)	0.147051	6.53072	1
discordant genes:97	Response to Calcium Ion (GO)	0.14821	3.01569	1
discordant genes:97	Hif2pathway (PI)	0.149771	6.40327	1
discordant genes:97	Keratan Sulfate Keratin Metabolism (Re)	0.149771	6.40327	1
discordant genes:97	Multicellular Organism Aging (GO)	0.149771	6.40327	1
discordant genes:97	Pos. Reg. of TOR Signaling (GO)	0.149771	6.40327	1
discordant genes:97	ncRNA 3 End Processing (GO)	0.149771	6.40327	1
discordant genes:97	Reg. of Actin Cytoskeleton Reorganization (GO)	0.149771	6.40327	1
discordant genes:97	Pos. Reg. of Embryonic Development (GO)	0.149771	6.40327	1
discordant genes:97	Neuronal Action Potential (GO)	0.149771	6.40327	1
discordant genes:97	Reg. of Response to Reactive Oxygen Species (GO)	0.149771	6.40327	1
discordant genes:97	Brain Morphogenesis (GO)	0.149771	6.40327	1
discordant genes:97	Signaling By WNT in Cancer (Re)	0.149771	6.40327	1
discordant genes:97	C Type Lectin Receptors Clrs (Re)	0.149856	2.99428	1
Concordant Upregulated genes:104	Il1 Pathway (PI)	0.150922	6.34379	1
Concordant Upregulated genes:104	ERBB1 Receptor Proximal Pathway (PI)	0.150922	6.34379	1
Concordant Upregulated genes:104	Lung Epithelium Development (GO)	0.150922	6.34379	1
Concordant Upregulated genes:104	Myd88 Dependent Toll Like Receptor Signaling Pathway (GO)	0.150922	6.34379	1
Concordant Upregulated genes:104	Pos. Reg. of B-Cell Mediated Immunity (GO)	0.150922	6.34379	1
Concordant Upregulated genes:104	Response to Vitamin D (GO)	0.150922	6.34379	1
Concordant Upregulated genes:104	Secretion By Tissue (GO)	0.150922	6.34379	1
Concordant Upregulated genes:104	ROS and RNS Production in Phagocytes (Re)	0.150922	6.34379	1
Concordant Upregulated genes:104	RHO Gtpases Activate Wasps and Waves (Re)	0.150922	6.34379	1
concordant Downregulated genes:28	Microtubule Based Movement (GO)	0.151106	6.68641	1
discordant genes:97	Cell Recognition (GO)	0.151506	2.97318	1
discordant genes:97	Reg. of Transferase Activity (GO)	0.151584	1.64588	1
discordant genes:97	Intrinsic Apoptotic Signaling Pathway (GO)	0.153103	2.27952	1
discordant genes:97	Membrane Depolarization During Action Potential (GO)	0.153823	6.21461	1
discordant genes:97	Reg. of Protein Targeting to Membrane (GO)	0.153823	6.21461	1
discordant genes:97	Pos. Reg. of Substrate Adhesion Dependent Cell Spreading (GO)	0.153823	6.21461	1
discordant genes:97	Neg. Reg. of Intracellular Steroid Hormone Receptor Signaling Pathway (GO)	0.153823	6.21461	1
discordant genes:97	Reg. of Gastrulation (GO)	0.153823	6.21461	1
discordant genes:97	Organic Cation Transport (GO)	0.153823	6.21461	1
discordant genes:97	Cellular Response to Osmotic Stress (GO)	0.153823	6.21461	1
discordant genes:97	Neuron Cellular Homeostasis (GO)	0.153823	6.21461	1
discordant genes:97	Mononuclear Cell Differentiation (GO)	0.153823	6.21461	1
discordant genes:97	Organic Acid Biosynthetic Process (GO)	0.154232	2.27131	1
Concordant Upregulated genes:104	Response to Purine Containing Compound (GO)	0.154254	2.93974	1
Concordant Upregulated genes:104	p38MAPK Pathway (Bi)	0.154776	6.16725	1
Concordant Upregulated genes:104	Fra Pathway (PI)	0.154776	6.16725	1
Concordant Upregulated genes:104	Il23 Pathway (PI)	0.154776	6.16725	1
Concordant Upregulated genes:104	Pos. Reg. of DNA Replication (GO)	0.154776	6.16725	1
Concordant Upregulated genes:104	Neg. Reg. of NOTCH Signaling Pathway (GO)	0.154776	6.16725	1
Concordant Upregulated genes:104	Peptidyl Tyrosine Autophosphorylation (GO)	0.154776	6.16725	1
Concordant Upregulated genes:104	Neutral Amino Acid Transport (GO)	0.154776	6.16725	1
Concordant Upregulated genes:104	Serine Family Amino Acid Metabolic Process (GO)	0.154776	6.16725	1
Concordant Upregulated genes:104	Detoxification of Reactive Oxygen Species (Re)	0.154776	6.16725	1
Concordant Upregulated genes:104	O Glycosylation of TSR Domain Containing Proteins (Re)	0.154776	6.16725	1
concordant Downregulated genes:28	Cell Cell Adhesion Via Plasma Membrane Adhesion Molecules (GO)	0.154857	6.50853	1
Concordant Upregulated genes:104	Signaling By WNT (Re)	0.154994	2.26719	1
Concordant Upregulated genes:104	Reg. of Muscle Contraction (GO)	0.157418	2.90124	1
concordant Downregulated genes:28	Response to Endoplasmic Reticulum Stress (GO)	0.157526	6.3871	1
concordant Downregulated genes:28	Developmental Maturation (GO)	0.157526	6.3871	1
concordant Downregulated genes:28	Protein Containing Complex Localization (GO)	0.157526	6.3871	1
discordant genes:97	Receptor Mediated Endocytosis (GO)	0.157635	2.24696	1
discordant genes:97	PIP3 Signaling in B Lymphocytes (SG)	0.157856	6.03676	1
discordant genes:97	Pos. Reg. of B-Cell Mediated Immunity (GO)	0.157856	6.03676	1
discordant genes:97	Cellular Response to Alkaloid (GO)	0.157856	6.03676	1
discordant genes:97	Transferrin Transport (GO)	0.157856	6.03676	1
discordant genes:97	RHO Gtpases Activate Wasps and Waves (Re)	0.157856	6.03676	1
discordant genes:97	HIV Life Cycle (Re)	0.158142	2.89163	1
Concordant Upregulated genes:104	SNARE Interactions in Vesicular Transport (KG)	0.158613	6.00028	1
Concordant Upregulated genes:104	Neg. Reg. of DNA Recombination (GO)	0.158613	6.00028	1
Concordant Upregulated genes:104	Pyrimidine Containing Compound Catabolic Process (GO)	0.158613	6.00028	1
Concordant Upregulated genes:104	Response to pH (GO)	0.158613	6.00028	1
Concordant Upregulated genes:104	Transcriptional Reg. By The AP 2 TFAP2 Family of Transcription Factors (Re)	0.158613	6.00028	1
Concordant Upregulated genes:104	Cellular Response to DNA Damage Stimulus (GO)	0.158673	1.69848	1
Concordant Upregulated genes:104	Peptidyl Serine Modification (GO)	0.159326	2.23643	1
Concordant Upregulated genes:104	Neg. Reg. of Locomotion (GO)	0.159326	2.23643	1
discordant genes:97	Pos. Reg. of Organelle Organization (GO)	0.159431	1.79692	1
Concordant Upregulated genes:104	Developmental Process Involved in Reproduction (GO)	0.159906	1.79662	1
discordant genes:97	Reg. of Hemopoiesis (GO)	0.160093	1.95184	1
Concordant Upregulated genes:104	Protein Localization to Cell Periphery (GO)	0.160415	2.22887	1
Concordant Upregulated genes:104	Postsynapse Organization (GO)	0.160595	2.86372	1
discordant genes:97	Platelet Activation (GO)	0.161481	2.8525	1
discordant genes:97	Activation of MAPK Activity (GO)	0.161481	2.8525	1
discordant genes:97	Neg. Reg. of NOTCH Signaling Pathway (GO)	0.161869	5.8688	1
discordant genes:97	Pos. Reg. of Sprouting Angiogenesis (GO)	0.161869	5.8688	1
discordant genes:97	Neg. Reg. of Alpha Beta T-Cell Activation (GO)	0.161869	5.8688	1
discordant genes:97	Intracellular Lipid Transport (GO)	0.161869	5.8688	1
discordant genes:97	Serine Family Amino Acid Metabolic Process (GO)	0.161869	5.8688	1
discordant genes:97	Reg. of TP53 Expression and Degradation (Re)	0.161869	5.8688	1
Concordant Upregulated genes:104	Ecadherin Nascent Aj Pathway (PI)	0.162432	5.8421	1
Concordant Upregulated genes:104	Postsynaptic Membrane Organization (GO)	0.162432	5.8421	1
Concordant Upregulated genes:104	Vesicle Mediated Transport Between Endosomal Compartments (GO)	0.162432	5.8421	1
Concordant Upregulated genes:104	Glutathione Metabolic Process (GO)	0.162432	5.8421	1
Concordant Upregulated genes:104	Pos. Reg. of DNA Recombination (GO)	0.162432	5.8421	1
Concordant Upregulated genes:104	Aging (GO)	0.1626	2.21421	1
discordant genes:97	Hemostasis (Re)	0.163272	1.78152	1
concordant Downregulated genes:28	Intrinsic Apoptotic Signaling Pathway (GO)	0.163372	6.13504	1
Concordant Upregulated genes:104	NIK NF kappaB Signaling (GO)	0.163784	2.82716	1
Concordant Upregulated genes:104	Response to Antibiotic (GO)	0.164794	2.19945	1
Concordant Upregulated genes:104	Reg. of Gene Expression Epigenetic (GO)	0.164794	2.19945	1
discordant genes:97	FAS Pathway (PI)	0.165864	5.70992	1
discordant genes:97	P38 Alpha Beta Downstream Pathway (PI)	0.165864	5.70992	1
discordant genes:97	Phosphatidylcholine Biosynthetic Process (GO)	0.165864	5.70992	1
discordant genes:97	Toxin Transport (GO)	0.165864	5.70992	1
discordant genes:97	Transcriptional Reg. By The AP 2 TFAP2 Family of Transcription Factors (Re)	0.165864	5.70992	1
Concordant Upregulated genes:104	Reg. of Protein Deacetylation (GO)	0.166234	5.69204	1
Concordant Upregulated genes:104	Pos. Reg. of Glial Cell Differentiation (GO)	0.166234	5.69204	1
Concordant Upregulated genes:104	Pos. Reg. of B-Cell Proliferation (GO)	0.166234	5.69204	1
Concordant Upregulated genes:104	Metanephric Nephron Development (GO)	0.166234	5.69204	1
discordant genes:97	Cell Cycle (Re)	0.166373	1.76936	1
discordant genes:97	Toll Like Receptor Cascades (Re)	0.166514	2.79573	1
Concordant Upregulated genes:104	Organic Hydroxy Compound Metabolic Process (GO)	0.167697	1.91605	1
discordant genes:97	Protein Polyubiquitination (GO)	0.167981	2.17715	1
Concordant Upregulated genes:104	Cardiac Chamber Development (GO)	0.168588	2.77401	1
Concordant Upregulated genes:104	Tissue Morphogenesis (GO)	0.169503	1.75891	1
discordant genes:97	Pos. Reg. of Intracellular Signal Transduction (GO)	0.169815	1.59103	1
discordant genes:97	ATR Pathway (PI)	0.16984	5.5594	1
discordant genes:97	Ecadherin Nascent Aj Pathway (PI)	0.16984	5.5594	1
discordant genes:97	Pos. Reg. of DNA Recombination (GO)	0.16984	5.5594	1
discordant genes:97	Semaphorin Plexin Signaling Pathway (GO)	0.16984	5.5594	1
discordant genes:97	Cellular Response to Glucose Starvation (GO)	0.16984	5.5594	1
discordant genes:97	Fibroblast Migration (GO)	0.16984	5.5594	1
discordant genes:97	Mtor Signalling (Re)	0.16984	5.5594	1
discordant genes:97	HSF1 Dependent Transactivation (Re)	0.16984	5.5594	1
discordant genes:97	Alzheimers Disease (KG)	0.169884	2.75911	1
Concordant Upregulated genes:104	Fatty Acid Metabolism (KG)	0.17002	5.54948	1
Concordant Upregulated genes:104	Tyrosine Metabolism (KG)	0.17002	5.54948	1
Concordant Upregulated genes:104	Amb2 Neutrophils Pathway (PI)	0.17002	5.54948	1
Concordant Upregulated genes:104	Upa Upar Pathway (PI)	0.17002	5.54948	1
Concordant Upregulated genes:104	Ecadherin Stabilization Pathway (PI)	0.17002	5.54948	1
Concordant Upregulated genes:104	Reg. of Beta Cell Development (Re)	0.17002	5.54948	1
Concordant Upregulated genes:104	Neurotransmitter Uptake (GO)	0.17002	5.54948	1
Concordant Upregulated genes:104	Pos. Reg. of Calcium Mediated Signaling (GO)	0.17002	5.54948	1
Concordant Upregulated genes:104	Cellular Modified Amino Acid Biosynthetic Process (GO)	0.17002	5.54948	1
Concordant Upregulated genes:104	Diseases Associated With Glycosaminoglycan Metabolism (Re)	0.17002	5.54948	1
Concordant Upregulated genes:104	Pos. Reg. of Cellular Protein Localization (GO)	0.171429	2.15635	1
Concordant Upregulated genes:104	Response to Virus (GO)	0.171429	2.15635	1
Concordant Upregulated genes:104	Striated Muscle Contraction (GO)	0.173417	2.72275	1
Concordant Upregulated genes:104	Reg. of Cation Transmembrane Transport (GO)	0.173658	2.14236	1
Concordant Upregulated genes:104	Bladder Cancer (KG)	0.173788	5.41466	1
Concordant Upregulated genes:104	BMP Pathway (PI)	0.173788	5.41466	1
Concordant Upregulated genes:104	ERBB1 Internalization Pathway (PI)	0.173788	5.41466	1
Concordant Upregulated genes:104	Pos. Reg. of Response to Biotic Stimulus (GO)	0.173788	5.41466	1
Concordant Upregulated genes:104	Reg. of Gluconeogenesis (GO)	0.173788	5.41466	1
Concordant Upregulated genes:104	Glucagon Like Peptide 1 GLP1 Regulates Insulin Secretion (Re)	0.173788	5.41466	1
Concordant Upregulated genes:104	Cooperation of PDCL Phlp1 and Tric Cct in G Protein Beta Folding (Re)	0.173788	5.41466	1
discordant genes:97	EPHB Fwd Pathway (PI)	0.173797	5.41739	1
discordant genes:97	Reg. of Spindle Organization (GO)	0.173797	5.41739	1
discordant genes:97	Response to Growth Hormone (GO)	0.173797	5.41739	1
discordant genes:97	Reg. of Keratinocyte Differentiation (GO)	0.173797	5.41739	1
discordant genes:97	Clathrin Dependent Endocytosis (GO)	0.173797	5.41739	1
discordant genes:97	Neg. Reg. of MAPK Pathway (Re)	0.173797	5.41739	1
discordant genes:97	TNF Signaling (Re)	0.173797	5.41739	1
concordant Downregulated genes:28	Peptidyl Serine Modification (GO)	0.173906	5.72363	1
discordant genes:97	Calcium Ion Transmembrane Transport (GO)	0.174989	2.13284	1
Concordant Upregulated genes:104	Neg. Reg. of Multi Organism Process (GO)	0.175032	2.7061	1
Concordant Upregulated genes:104	Pos. Reg. of Synaptic Transmission (GO)	0.176649	2.68966	1
discordant genes:97	Neg. Reg. of Transport (GO)	0.176687	1.87304	1
Concordant Upregulated genes:104	Reg. of Cell Adhesion (GO)	0.177039	1.73091	1
Concordant Upregulated genes:104	TCPTP Pathway (PI)	0.17754	5.28553	1
Concordant Upregulated genes:104	Phenol Containing Compound Biosynthetic Process (GO)	0.17754	5.28553	1
Concordant Upregulated genes:104	Histone Ubiquitination (GO)	0.17754	5.28553	1
Concordant Upregulated genes:104	Reg. of Peptidyl Threonine Phosphorylation (GO)	0.17754	5.28553	1
Concordant Upregulated genes:104	Genitalia Development (GO)	0.17754	5.28553	1
discordant genes:97	IFNG Pathway (PI)	0.177736	5.28175	1
discordant genes:97	Upa Upar Pathway (PI)	0.177736	5.28175	1
discordant genes:97	FOXM1 Pathway (PI)	0.177736	5.28175	1
discordant genes:97	Reg. of Beta Cell Development (Re)	0.177736	5.28175	1
discordant genes:97	Detection of Mechanical Stimulus (GO)	0.177736	5.28175	1
discordant genes:97	Pos. Reg. of Calcium Mediated Signaling (GO)	0.177736	5.28175	1
discordant genes:97	Reg. of Response to Cytokine Stimulus (GO)	0.17836	2.67157	1
concordant Downregulated genes:28	Pos. Reg. of Cellular Protein Localization (GO)	0.179648	5.52029	1
Concordant Upregulated genes:104	Sulfur Compound Biosynthetic Process (GO)	0.179891	2.65736	1
Concordant Upregulated genes:104	Reg. of Neurotransmitter Levels (GO)	0.180395	2.10146	1
concordant Downregulated genes:28	Maintenance of Location (GO)	0.181208	5.46653	1
Concordant Upregulated genes:104	Amino Sugar and Nucleotide Sugar Metabolism (KG)	0.181274	5.16238	1
Concordant Upregulated genes:104	Reg. of Phospholipase C Activity (GO)	0.181274	5.16238	1
Concordant Upregulated genes:104	Reg. of Membrane Lipid Distribution (GO)	0.181274	5.16238	1
Concordant Upregulated genes:104	Reg. of Acute Inflammatory Response (GO)	0.181274	5.16238	1
Concordant Upregulated genes:104	Response to Ischemia (GO)	0.181274	5.16238	1
Concordant Upregulated genes:104	Sulfur Compound Transport (GO)	0.181274	5.16238	1
Concordant Upregulated genes:104	Glial Cell Migration (GO)	0.181274	5.16238	1
Concordant Upregulated genes:104	Neg. Reg. of Stress Activated Protein Kinase Signaling Cascade (GO)	0.181274	5.16238	1
Concordant Upregulated genes:104	Pos. Reg. of Cell Cycle G1 S Phase Transition (GO)	0.181274	5.16238	1
Concordant Upregulated genes:104	Dopamine Receptor Signaling Pathway (GO)	0.181274	5.16238	1
Concordant Upregulated genes:104	G0 to G1 Transition (GO)	0.181274	5.16238	1
discordant genes:97	Multicellular Organismal Homeostasis (GO)	0.181399	1.85226	1
Concordant Upregulated genes:104	Pos. Reg. of WNT Signaling Pathway (GO)	0.181516	2.64149	1
discordant genes:97	Integrin3 Pathway (PI)	0.181656	5.15269	1
discordant genes:97	BMP Pathway (PI)	0.181656	5.15269	1
discordant genes:97	DAG and IP3 Signaling (Re)	0.181656	5.15269	1
discordant genes:97	Spindle Localization (GO)	0.181656	5.15269	1
discordant genes:97	Reg. of Protein Oligomerization (GO)	0.181656	5.15269	1
discordant genes:97	Phosphatidic Acid Biosynthetic Process (GO)	0.181656	5.15269	1
discordant genes:97	Binding and Uptake of Ligands By Scavenger Receptors (Re)	0.181656	5.15269	1
discordant genes:97	Glucagon Like Peptide 1 GLP1 Regulates Insulin Secretion (Re)	0.181656	5.15269	1
discordant genes:97	Cooperation of PDCL Phlp1 and Tric Cct in G Protein Beta Folding (Re)	0.181656	5.15269	1
discordant genes:97	Cellular Senescence (Re)	0.181769	2.6381	1
discordant genes:97	Response to Antibiotic (GO)	0.182079	2.09029	1
Concordant Upregulated genes:104	Reg. of Chromosome Organization (GO)	0.182656	2.08816	1
Concordant Upregulated genes:104	Gastrulation (GO)	0.183142	2.62581	1
discordant genes:97	Pos. Reg. of Cell Activation (GO)	0.184459	2.07646	1
Concordant Upregulated genes:104	Neg. Reg. of Cellular Component Organization (GO)	0.184703	1.70375	1
Concordant Upregulated genes:104	Temperature Homeostasis (GO)	0.184771	2.61032	1
Concordant Upregulated genes:104	Keratinocyte Pathway (Bi)	0.184992	5.04448	1
Concordant Upregulated genes:104	Syndecan 1 Pathway (PI)	0.184992	5.04448	1
Concordant Upregulated genes:104	Intermediate Filament Based Process (GO)	0.184992	5.04448	1
Concordant Upregulated genes:104	Neg. Reg. of Smooth Muscle Cell Proliferation (GO)	0.184992	5.04448	1
Concordant Upregulated genes:104	Neg. Reg. of Fat Cell Differentiation (GO)	0.184992	5.04448	1
Concordant Upregulated genes:104	Reg. of Meiotic Cell Cycle (GO)	0.184992	5.04448	1
Concordant Upregulated genes:104	Peptidyl Cysteine Modification (GO)	0.184992	5.04448	1
Concordant Upregulated genes:104	Reg. of Nitric Oxide Synthase Activity (GO)	0.184992	5.04448	1
Concordant Upregulated genes:104	Pos. Reg. of Muscle Contraction (GO)	0.184992	5.04448	1
Concordant Upregulated genes:104	Response to Progesterone (GO)	0.184992	5.04448	1
Concordant Upregulated genes:104	Collagen Catabolic Process (GO)	0.184992	5.04448	1
Concordant Upregulated genes:104	Potassium Ion Import Across Plasma Membrane (GO)	0.184992	5.04448	1
discordant genes:97	Cytosolic Calcium Ion Transport (GO)	0.185188	2.60545	1
discordant genes:97	Aldosterone Regulated Sodium Reabsorption (KG)	0.185557	5.029	1
discordant genes:97	Vasopressin Regulated Water Reabsorption (KG)	0.185557	5.029	1
discordant genes:97	TCPTP Pathway (PI)	0.185557	5.029	1
discordant genes:97	Thrombin Par1 Pathway (PI)	0.185557	5.029	1
discordant genes:97	Voltage Gated Potassium Channels (Re)	0.185557	5.029	1
discordant genes:97	Neg. Reg. of Response to Biotic Stimulus (GO)	0.185557	5.029	1
discordant genes:97	Reg. of Peptidyl Threonine Phosphorylation (GO)	0.185557	5.029	1
discordant genes:97	Membrane Repolarization (GO)	0.185557	5.029	1
discordant genes:97	Sumoylation of Transcription Cofactors (Re)	0.185557	5.029	1
discordant genes:97	Reg. of Developmental Growth (GO)	0.185653	2.06963	1
discordant genes:97	Epithelial Tube Morphogenesis (GO)	0.185653	2.06963	1
concordant Downregulated genes:28	Cell Substrate Adhesion (GO)	0.186904	5.27924	1
Concordant Upregulated genes:104	Pos. Reg. of Cell Death (GO)	0.187803	1.69312	1
Concordant Upregulated genes:104	Chemokine Receptors Bind Chemokines (Re)	0.188693	4.93228	1
Concordant Upregulated genes:104	Chondrocyte Development (GO)	0.188693	4.93228	1
Concordant Upregulated genes:104	Bone Growth (GO)	0.188693	4.93228	1
Concordant Upregulated genes:104	Histone H3 K9 Modification (GO)	0.188693	4.93228	1
Concordant Upregulated genes:104	Pos. Reg. of Biomineral Tissue Development (GO)	0.188693	4.93228	1
Concordant Upregulated genes:104	Response to Nicotine (GO)	0.188693	4.93228	1
discordant genes:97	Lysine Degradation (KG)	0.18944	4.91253	1
discordant genes:97	Amino Sugar and Nucleotide Sugar Metabolism (KG)	0.18944	4.91253	1
discordant genes:97	Hnf3b Pathway (PI)	0.18944	4.91253	1
discordant genes:97	Cxcr3 Pathway (PI)	0.18944	4.91253	1
discordant genes:97	Hnf3a Pathway (PI)	0.18944	4.91253	1
discordant genes:97	Viral Messenger RNA Synthesis (Re)	0.18944	4.91253	1
discordant genes:97	Reg. of Lyase Activity (GO)	0.18944	4.91253	1
discordant genes:97	Protein Destabilization (GO)	0.18944	4.91253	1
discordant genes:97	Reg. of Fatty Acid Biosynthetic Process (GO)	0.18944	4.91253	1
discordant genes:97	G0 to G1 Transition (GO)	0.18944	4.91253	1
discordant genes:97	Transcriptional Activity of Smad2 Smad3:Smad4 Heterotrimer (Re)	0.18944	4.91253	1
discordant genes:97	TP53 Regulates Transcription of Cell Death Genes (Re)	0.18944	4.91253	1
Concordant Upregulated genes:104	Response to Toxic Substance (GO)	0.190128	1.81654	1
discordant genes:97	Pos. Reg. of Synaptic Transmission (GO)	0.190335	2.55794	1
Concordant Upregulated genes:104	Calcium Signaling Pathway (KG)	0.191308	2.55006	1
Concordant Upregulated genes:104	Chemokine Signaling Pathway (KG)	0.191308	2.55006	1
Concordant Upregulated genes:104	NOTCH Signaling Pathway (KG)	0.192378	4.82388	1
Concordant Upregulated genes:104	Il6 7 Pathway (PI)	0.192378	4.82388	1
Concordant Upregulated genes:104	G Alpha Z Signalling Events (Re)	0.192378	4.82388	1
Concordant Upregulated genes:104	Cofactor Transport (GO)	0.192378	4.82388	1
Concordant Upregulated genes:104	Response to Epidermal Growth Factor (GO)	0.192378	4.82388	1
Concordant Upregulated genes:104	Protein K63 Linked Ubiquitination (GO)	0.192378	4.82388	1
Concordant Upregulated genes:104	Reg. of Systemic Arterial Blood Pressure Mediated By a Chemical Signal (GO)	0.192378	4.82388	1
discordant genes:97	Cellular Response to External Stimulus (GO)	0.192857	2.02949	1
discordant genes:97	Maintenance of Location (GO)	0.192857	2.02949	1
discordant genes:97	Leukocyte Cell Cell Adhesion (GO)	0.192857	2.02949	1
concordant Downregulated genes:28	Pos. Reg. of Proteolysis (GO)	0.193077	5.08994	1
discordant genes:97	Chemotaxis (SG)	0.193305	4.79964	1
discordant genes:97	Ilk Pathway (PI)	0.193305	4.79964	1
discordant genes:97	TNF Pathway (PI)	0.193305	4.79964	1
discordant genes:97	ERBB2 Erbb3 Pathway (PI)	0.193305	4.79964	1
discordant genes:97	Syndecan 1 Pathway (PI)	0.193305	4.79964	1
discordant genes:97	Glutamate Secretion (GO)	0.193305	4.79964	1
discordant genes:97	Intermediate Filament Based Process (GO)	0.193305	4.79964	1
discordant genes:97	Neg. Reg. of Fat Cell Differentiation (GO)	0.193305	4.79964	1
discordant genes:97	Presynapse Organization (GO)	0.193305	4.79964	1
discordant genes:97	Response to Amino Acid Starvation (GO)	0.193305	4.79964	1
discordant genes:97	Elastic Fibre Formation (Re)	0.193305	4.79964	1
discordant genes:97	Sumoylation of DNA Replication Proteins (Re)	0.193305	4.79964	1
discordant genes:97	Neg. Reg. of Intracellular Signal Transduction (GO)	0.193848	1.80009	1
Concordant Upregulated genes:104	Inflammatory Response (GO)	0.194062	1.67223	1
Concordant Upregulated genes:104	Reg. of Ossification (GO)	0.194588	2.52086	1
Concordant Upregulated genes:104	Reg. of Protein Localization to Membrane (GO)	0.194588	2.52086	1
Concordant Upregulated genes:104	Type II Diabetes Mellitus (KG)	0.196046	4.72122	1
Concordant Upregulated genes:104	Ajdiss 2pathway (PI)	0.196046	4.72122	1
Concordant Upregulated genes:104	Response to Cold (GO)	0.196046	4.72122	1
Concordant Upregulated genes:104	Pos. Reg. of Potassium Ion Transport (GO)	0.196046	4.72122	1
Concordant Upregulated genes:104	Sulfur Compound Catabolic Process (GO)	0.196046	4.72122	1
Concordant Upregulated genes:104	Digestive Tract Morphogenesis (GO)	0.196046	4.72122	1
Concordant Upregulated genes:104	Striated Muscle Adaptation (GO)	0.196046	4.72122	1
Concordant Upregulated genes:104	T-Cell Mediated Cytotoxicity (GO)	0.196046	4.72122	1
Concordant Upregulated genes:104	Nucleobase Containing Small Molecule Catabolic Process (GO)	0.196046	4.72122	1
Concordant Upregulated genes:104	Reg. of Cardiocyte Differentiation (GO)	0.196046	4.72122	1
Concordant Upregulated genes:104	Regeneration (GO)	0.196231	2.5067	1
discordant genes:97	Coronary Vasculature Development (GO)	0.197152	4.69292	1
discordant genes:97	Histone H3 K9 Modification (GO)	0.197152	4.69292	1
discordant genes:97	ER Nucleus Signaling Pathway (GO)	0.197152	4.69292	1
discordant genes:97	Pos. Reg. of Biomineral Tissue Development (GO)	0.197152	4.69292	1
discordant genes:97	Cortical Cytoskeleton Organization (GO)	0.197152	4.69292	1
discordant genes:97	Multi Organism Cellular Process (GO)	0.197152	4.69292	1
discordant genes:97	Neg. Reg. of G Protein Coupled Receptor Signaling Pathway (GO)	0.197152	4.69292	1
discordant genes:97	Huntingtons Disease (KG)	0.197227	2.49721	1
discordant genes:97	Gastrulation (GO)	0.197227	2.49721	1
discordant genes:97	Lymphocyte Activation Involved in Immune Response (GO)	0.197227	2.49721	1
Concordant Upregulated genes:104	Carbohydrate Catabolic Process (GO)	0.197876	2.49256	1
discordant genes:97	Pathways in Cancer (KG)	0.198915	1.99723	1
discordant genes:97	Temperature Homeostasis (GO)	0.198955	2.48246	1
Concordant Upregulated genes:104	Reg. of Cellular Localization (GO)	0.198994	1.57447	1
discordant genes:97	Lipid Biosynthetic Process (GO)	0.199458	1.65341	1
discordant genes:97	Reg. of Anatomical Structure Size (GO)	0.199683	1.77705	1
Concordant Upregulated genes:104	Angiopoietin Receptor Pathway (PI)	0.199698	4.62271	1
Concordant Upregulated genes:104	FOXO Pathway (PI)	0.199698	4.62271	1
Concordant Upregulated genes:104	Signaling By ERBB2 (Re)	0.199698	4.62271	1
Concordant Upregulated genes:104	Necrotic Cell Death (GO)	0.199698	4.62271	1
Concordant Upregulated genes:104	Face Development (GO)	0.199698	4.62271	1
Concordant Upregulated genes:104	Fatty Acid Derivative Transport (GO)	0.199698	4.62271	1
Concordant Upregulated genes:104	Mesenchyme Morphogenesis (GO)	0.199698	4.62271	1
Concordant Upregulated genes:104	Reg. of Ubiquitin Protein Transferase Activity (GO)	0.199698	4.62271	1
Concordant Upregulated genes:104	Signaling By EGFR (Re)	0.199698	4.62271	1
discordant genes:97	Sumoylation (Re)	0.200685	2.46789	1
discordant genes:97	NOTCH Signaling Pathway (KG)	0.20098	4.59073	1
discordant genes:97	Delta Np63 Pathway (PI)	0.20098	4.59073	1
discordant genes:97	Recycling Pathway of L1 (Re)	0.20098	4.59073	1
discordant genes:97	Neg. Reg. of Peptidyl Tyrosine Phosphorylation (GO)	0.20098	4.59073	1
discordant genes:97	Cellular Response to Virus (GO)	0.20098	4.59073	1
discordant genes:97	Protein Localization to Cilium (GO)	0.20098	4.59073	1
discordant genes:97	Humoral Immune Response Mediated By Circulating Immunoglobulin (GO)	0.20098	4.59073	1
discordant genes:97	Reg. of Protein Autophosphorylation (GO)	0.20098	4.59073	1
discordant genes:97	Protein K63 Linked Ubiquitination (GO)	0.20098	4.59073	1
Concordant Upregulated genes:104	Pos. Reg. of Proteolysis (GO)	0.201018	1.98748	1
Concordant Upregulated genes:104	Fc Receptor Signaling Pathway (GO)	0.20117	2.46474	1
discordant genes:97	Reg. of Cell Adhesion (GO)	0.202804	1.64288	1
Concordant Upregulated genes:104	Glutathione Metabolism (KG)	0.203333	4.52789	1
Concordant Upregulated genes:104	Insulin Receptor Pathway in Cardiac Myocytes (SG)	0.203333	4.52789	1
Concordant Upregulated genes:104	Body Morphogenesis (GO)	0.203333	4.52789	1
Concordant Upregulated genes:104	Neg. Reg. of ERBB Signaling Pathway (GO)	0.203333	4.52789	1
Concordant Upregulated genes:104	Lung Morphogenesis (GO)	0.203333	4.52789	1
Concordant Upregulated genes:104	Pos. Reg. of Cell Matrix Adhesion (GO)	0.203333	4.52789	1
Concordant Upregulated genes:104	Netrin 1 Signaling (Re)	0.203333	4.52789	1
concordant Downregulated genes:28	Class I MHC Mediated Antigen Processing Presentation (Re)	0.20479	4.76175	1
concordant Downregulated genes:28	Reg. of Protein Catabolic Process (GO)	0.20479	4.76175	1
discordant genes:97	Glycerolipid Metabolism (KG)	0.204791	4.49227	1
discordant genes:97	Ajdiss 2pathway (PI)	0.204791	4.49227	1
discordant genes:97	Hes Hey Pathway (PI)	0.204791	4.49227	1
discordant genes:97	Neg. Reg. of Leukocyte Apoptotic Process (GO)	0.204791	4.49227	1
discordant genes:97	Reg. of Action Potential (GO)	0.204791	4.49227	1
discordant genes:97	Heterophilic Cell Cell Adhesion Via Plasma Membrane Cell Adhesion Molecules (GO)	0.204791	4.49227	1
discordant genes:97	Gap Junction Trafficking and Regulation (Re)	0.204791	4.49227	1
discordant genes:97	Membrane Docking (GO)	0.205885	2.42528	1
discordant genes:97	Response to Starvation (GO)	0.205885	2.42528	1
discordant genes:97	Cell Substrate Adhesion (GO)	0.206246	1.95979	1
Concordant Upregulated genes:104	Starch and Sucrose Metabolism (KG)	0.206952	4.43776	1
Concordant Upregulated genes:104	Neg. Reg. of Innate Immune Response (GO)	0.206952	4.43776	1
Concordant Upregulated genes:104	Production of Small RNA Involved in Gene Silencing By RNA (GO)	0.206952	4.43776	1
Concordant Upregulated genes:104	Neg. Reg. of Proteasomal Protein Catabolic Process (GO)	0.206952	4.43776	1
Concordant Upregulated genes:104	Reg. of Vascular Smooth Muscle Cell Proliferation (GO)	0.206952	4.43776	1
discordant genes:97	Response to Acid Chemical (GO)	0.207474	1.95369	1
concordant Downregulated genes:28	Forebrain Development (GO)	0.20782	4.68248	1
Concordant Upregulated genes:104	Synaptic Signaling (GO)	0.208412	1.627	1
discordant genes:97	Pos. Reg. of NOTCH Signaling Pathway (GO)	0.208583	4.39925	1
discordant genes:97	Neuromuscular Process Controlling Balance (GO)	0.208583	4.39925	1
discordant genes:97	Reg. of Fatty Acid Metabolic Process (GO)	0.208583	4.39925	1
discordant genes:97	Aspartate Family Amino Acid Metabolic Process (GO)	0.208583	4.39925	1
discordant genes:97	Signaling By EGFR (Re)	0.208583	4.39925	1
discordant genes:97	Reg. of Lipid Biosynthetic Process (GO)	0.209361	2.39734	1
Concordant Upregulated genes:104	PTP1B Pathway (PI)	0.210555	4.35027	1
Concordant Upregulated genes:104	AR Tf Pathway (PI)	0.210555	4.35027	1
Concordant Upregulated genes:104	KIT Pathway (PI)	0.210555	4.35027	1
Concordant Upregulated genes:104	Aquaporin Mediated Transport (Re)	0.210555	4.35027	1
Concordant Upregulated genes:104	Cell Differentiation Involved in Kidney Development (GO)	0.210555	4.35027	1
Concordant Upregulated genes:104	Reg. of Transcription Regulatory Region DNA Binding (GO)	0.210555	4.35027	1
discordant genes:97	Reg. of Synaptic Plasticity (GO)	0.211101	2.38377	1
discordant genes:97	Arf6 Trafficking Pathway (PI)	0.212358	4.30908	1
discordant genes:97	Neurotransmitter Release Cycle (Re)	0.212358	4.30908	1
discordant genes:97	Neg. Reg. of ERBB Signaling Pathway (GO)	0.212358	4.30908	1
discordant genes:97	Neg. Reg. of Lymphocyte Differentiation (GO)	0.212358	4.30908	1
discordant genes:97	Cardiac Muscle Cell Action Potential Involved in Contraction (GO)	0.212358	4.30908	1
discordant genes:97	Netrin 1 Signaling (Re)	0.212358	4.30908	1
discordant genes:97	Carbohydrate Catabolic Process (GO)	0.212842	2.37035	1
Concordant Upregulated genes:104	Reg. of Cellular Component Biogenesis (GO)	0.21324	1.53688	1
Concordant Upregulated genes:104	Cell Projection Assembly (GO)	0.213471	1.72675	1
discordant genes:97	Monovalent Inorganic Cation Transport (GO)	0.213507	1.72538	1
discordant genes:97	Response to Toxic Substance (GO)	0.213507	1.72538	1
discordant genes:97	Methylation (GO)	0.213639	1.92372	1
Concordant Upregulated genes:104	Endometrial Cancer (KG)	0.214141	4.2663	1
Concordant Upregulated genes:104	Response to Zinc Ion (GO)	0.214141	4.2663	1
Concordant Upregulated genes:104	Reg. of Kidney Development (GO)	0.214141	4.2663	1
Concordant Upregulated genes:104	Neg. Reg. of Viral Genome Replication (GO)	0.214141	4.2663	1
Concordant Upregulated genes:104	Activation of MAPKK Activity (GO)	0.214141	4.2663	1
Concordant Upregulated genes:104	Interleukin 12 Production (GO)	0.214141	4.2663	1
Concordant Upregulated genes:104	Response to Bronchodilator (GO)	0.214141	4.2663	1
Concordant Upregulated genes:104	Cellular Component Disassembly (GO)	0.215374	1.71993	1
discordant genes:97	Starch and Sucrose Metabolism (KG)	0.216115	4.22263	1
discordant genes:97	Taste Transduction (KG)	0.216115	4.22263	1
discordant genes:97	NFAT Pathway (Bi)	0.216115	4.22263	1
discordant genes:97	Histone H3 K4 Methylation (GO)	0.216115	4.22263	1
discordant genes:97	Ruffle Organization (GO)	0.216115	4.22263	1
discordant genes:97	Fc Receptor Signaling Pathway (GO)	0.21633	2.34393	1
Concordant Upregulated genes:104	Nucleotide Binding Domain Leucine Rich Repeat Containing Receptor NLR Signaling Pathways (Re)	0.217712	4.18556	1
Concordant Upregulated genes:104	Endosome to Lysosome Transport (GO)	0.217712	4.18556	1
Concordant Upregulated genes:104	Cell Migration Involved in Sprouting Angiogenesis (GO)	0.217712	4.18556	1
Concordant Upregulated genes:104	Pos. Reg. of Calcium Ion Transport Into Cytosol (GO)	0.217712	4.18556	1
Concordant Upregulated genes:104	Visual Behavior (GO)	0.217712	4.18556	1
Concordant Upregulated genes:104	Endoplasmic Reticulum Organization (GO)	0.217712	4.18556	1
Concordant Upregulated genes:104	Receptor Clustering (GO)	0.217712	4.18556	1
discordant genes:97	Import Into Cell (GO)	0.218098	1.59704	1
discordant genes:97	Actomyosin Structure Organization (GO)	0.219823	2.31807	1
discordant genes:97	KIT Pathway (PI)	0.219854	4.13961	1
discordant genes:97	Multicellular Organismal Movement (GO)	0.219854	4.13961	1
discordant genes:97	Cell Differentiation Involved in Kidney Development (GO)	0.219854	4.13961	1
discordant genes:97	Sodium Ion Homeostasis (GO)	0.219854	4.13961	1
discordant genes:97	Reg. of Cilium Assembly (GO)	0.219854	4.13961	1
discordant genes:97	Nuclear Envelope Breakdown (Re)	0.219854	4.13961	1
discordant genes:97	Reg. of Hormone Levels (GO)	0.22052	1.70062	1
concordant Downregulated genes:28	G Alpha I Signalling Events (Re)	0.220828	4.36795	1
Concordant Upregulated genes:104	Basal Cell Carcinoma (KG)	0.221266	4.10821	1
Concordant Upregulated genes:104	Txa2pathway (PI)	0.221266	4.10821	1
Concordant Upregulated genes:104	Fatty Acid Derivative Biosynthetic Process (GO)	0.221266	4.10821	1
Concordant Upregulated genes:104	Pos. Reg. of Blood Vessel Endothelial Cell Migration (GO)	0.221266	4.10821	1
Concordant Upregulated genes:104	Neg. Reg. of Tumor Necrosis Factor Superfamily Cytokine Production (GO)	0.221266	4.10821	1
discordant genes:97	Ion Channel Transport (Re)	0.221572	2.30535	1
discordant genes:97	Muscle Cell Proliferation (GO)	0.221572	2.30535	1
discordant genes:97	Cellular Lipid Metabolic Process (GO)	0.223531	1.50996	1
discordant genes:97	Ppara Pathway (Bi)	0.223575	4.05978	1
discordant genes:97	Metabolism of Non Coding RNA (Re)	0.223575	4.05978	1
discordant genes:97	Morphogenesis of An Epithelial Sheet (GO)	0.223575	4.05978	1
discordant genes:97	Cilium Movement (GO)	0.223575	4.05978	1
discordant genes:97	Interleukin 12 Production (GO)	0.223575	4.05978	1
discordant genes:97	Pkmts Methylate Histone Lysines (Re)	0.223575	4.05978	1
Concordant Upregulated genes:104	Protein Complex Oligomerization (GO)	0.223995	1.68989	1
Concordant Upregulated genes:104	Pos. Reg. of Transmembrane Transport (GO)	0.224398	2.28595	1
discordant genes:97	Reg. of Vesicle Mediated Transport (GO)	0.224556	1.68679	1
Concordant Upregulated genes:104	Hedgehog Signaling Pathway (KG)	0.224805	4.03282	1
Concordant Upregulated genes:104	Neg. Reg. of Reproductive Process (GO)	0.224805	4.03282	1
Concordant Upregulated genes:104	Forebrain Cell Migration (GO)	0.224805	4.03282	1
Concordant Upregulated genes:104	Nucleoside Triphosphate Metabolic Process (GO)	0.224805	4.03282	1
Concordant Upregulated genes:104	Androgen Receptor Signaling Pathway (GO)	0.224805	4.03282	1
Concordant Upregulated genes:104	Establishment of Protein Localization to Plasma Membrane (GO)	0.224805	4.03282	1
Concordant Upregulated genes:104	Intracellular Estrogen Receptor Signaling Pathway (GO)	0.224805	4.03282	1
Concordant Upregulated genes:104	Pos. Reg. of Blood Vessel Diameter (GO)	0.224805	4.03282	1
Concordant Upregulated genes:104	Neuroinflammatory Response (GO)	0.224805	4.03282	1
discordant genes:97	Reg. of Carbohydrate Metabolic Process (GO)	0.225072	2.28031	1
Concordant Upregulated genes:104	Myeloid Leukocyte Differentiation (GO)	0.226067	2.27416	1
concordant Downregulated genes:28	Pos. Reg. of Catabolic Process (GO)	0.226767	4.23627	1
discordant genes:97	Tgfbr Pathway (PI)	0.227279	3.98298	1
discordant genes:97	Protein K48 Linked Ubiquitination (GO)	0.227279	3.98298	1
discordant genes:97	Reg. of Cholesterol Biosynthesis By SREBP SREBF (Re)	0.227279	3.98298	1
discordant genes:97	HSP90 Chaperone Cycle For Steroid Hormone Receptors SHR (Re)	0.227279	3.98298	1
Concordant Upregulated genes:104	Class I MHC Mediated Antigen Processing Presentation (Re)	0.228139	1.85844	1
concordant Downregulated genes:28	Leukocyte Migration (GO)	0.228245	4.20417	1
Concordant Upregulated genes:104	SHP2 Pathway (PI)	0.228327	3.9607	1
Concordant Upregulated genes:104	Protein Trimerization (GO)	0.228327	3.9607	1
Concordant Upregulated genes:104	Glomerulus Development (GO)	0.228327	3.9607	1
Concordant Upregulated genes:104	Neg. Reg. of Response to Cytokine Stimulus (GO)	0.228327	3.9607	1
Concordant Upregulated genes:104	Histone H3 Acetylation (GO)	0.228327	3.9607	1
Concordant Upregulated genes:104	Pos. Reg. of Viral Life Cycle (GO)	0.228327	3.9607	1
discordant genes:97	Peptidyl Tyrosine Modification (GO)	0.22985	1.8499	1
discordant genes:97	Hivnef Pathway (Bi)	0.230966	3.90901	1
discordant genes:97	Txa2pathway (PI)	0.230966	3.90901	1
discordant genes:97	RAC1 Pathway (PI)	0.230966	3.90901	1
discordant genes:97	Ovarian Follicle Development (GO)	0.230966	3.90901	1
discordant genes:97	Reg. of Tumor Necrosis Factor Mediated Signaling Pathway (GO)	0.230966	3.90901	1
discordant genes:97	Pos. Reg. of Dephosphorylation (GO)	0.230966	3.90901	1
discordant genes:97	Chaperone Mediated Protein Folding (GO)	0.230966	3.90901	1
Concordant Upregulated genes:104	Bone Resorption (GO)	0.231834	3.89101	1
Concordant Upregulated genes:104	Pos. Reg. of Striated Muscle Cell Differentiation (GO)	0.231834	3.89101	1
discordant genes:97	Cellular Response to Drug (GO)	0.233625	1.83366	1
concordant Downregulated genes:28	Reg. of Intracellular Transport (GO)	0.233642	4.09174	1
discordant genes:97	Protein Targeting to Membrane (GO)	0.233841	2.21991	1
Concordant Upregulated genes:104	Reg. of Nuclear Division (GO)	0.234422	2.21686	1
discordant genes:97	Lipid Phosphorylation (GO)	0.234635	3.83775	1
discordant genes:97	Pos. Reg. of Intrinsic Apoptotic Signaling Pathway (GO)	0.234635	3.83775	1
discordant genes:97	Androgen Receptor Signaling Pathway (GO)	0.234635	3.83775	1
discordant genes:97	Intracellular Estrogen Receptor Signaling Pathway (GO)	0.234635	3.83775	1
Concordant Upregulated genes:104	Signaling By PDGF (Re)	0.235325	3.82374	1
Concordant Upregulated genes:104	Embryonic Pattern Specification (GO)	0.235325	3.82374	1
Concordant Upregulated genes:104	Neg. Reg. of Nuclear Division (GO)	0.235325	3.82374	1
Concordant Upregulated genes:104	Non Integrin Membrane ECM Interactions (Re)	0.235325	3.82374	1
concordant Downregulated genes:28	Pos. Reg. of Establishment of Protein Localization (GO)	0.236572	4.03287	1
Concordant Upregulated genes:104	Signaling By NOTCH (Re)	0.237769	2.19499	1
Concordant Upregulated genes:104	Neg. Reg. of WNT Signaling Pathway (GO)	0.237769	2.19499	1
discordant genes:97	Protein Localization to Vacuole (GO)	0.238287	3.76906	1
discordant genes:97	Glomerulus Development (GO)	0.238287	3.76906	1
Concordant Upregulated genes:104	Pos. Reg. of Carbohydrate Metabolic Process (GO)	0.2388	3.75877	1
Concordant Upregulated genes:104	Tissue Regeneration (GO)	0.2388	3.75877	1
concordant Downregulated genes:28	Pattern Specification Process (GO)	0.239006	3.98507	1
discordant genes:97	Response to Topologically Incorrect Protein (GO)	0.240873	2.17403	1
discordant genes:97	Cellular Component Disassembly (GO)	0.24089	1.63355	1
Concordant Upregulated genes:104	Fat Cell Differentiation (GO)	0.24112	2.17328	1
discordant genes:97	NOTCH Pathway (PI)	0.241922	3.7028	1
discordant genes:97	Iron Uptake and Transport (Re)	0.241922	3.7028	1
discordant genes:97	Membrane Protein Proteolysis (GO)	0.241922	3.7028	1
discordant genes:97	Bone Resorption (GO)	0.241922	3.7028	1
Concordant Upregulated genes:104	Phenol Containing Compound Metabolic Process (GO)	0.24226	3.69599	1
Concordant Upregulated genes:104	Embryonic Digit Morphogenesis (GO)	0.24226	3.69599	1
Concordant Upregulated genes:104	Pos. Reg. of Lipid Transport (GO)	0.24226	3.69599	1
Concordant Upregulated genes:104	Neg. Reg. of Cell Substrate Adhesion (GO)	0.24226	3.69599	1
Concordant Upregulated genes:104	Protein Insertion Into Membrane (GO)	0.24226	3.69599	1
discordant genes:97	Mitotic G2 G2 M Phases (Re)	0.242632	2.1628	1
Concordant Upregulated genes:104	Sensory Perception of Light Stimulus (GO)	0.242796	2.16259	1
Concordant Upregulated genes:104	Reg. of Actin Cytoskeleton (KG)	0.244473	2.15201	1
Concordant Upregulated genes:104	Adaptive Immune System (Re)	0.244882	1.52574	1
Concordant Upregulated genes:104	Reg. of Cell Cycle Process (GO)	0.244882	1.52574	1
discordant genes:97	Atf2 Pathway (PI)	0.245539	3.63886	1
discordant genes:97	P53 Reg. Pathway (PI)	0.245539	3.63886	1
discordant genes:97	Signaling By PDGF (Re)	0.245539	3.63886	1
discordant genes:97	Mechanoreceptor Differentiation (GO)	0.245539	3.63886	1
Concordant Upregulated genes:104	Dicarboxylic Acid Metabolic Process (GO)	0.245705	3.63529	1
Concordant Upregulated genes:104	Pos. Reg. of Protein Localization to Cell Periphery (GO)	0.245705	3.63529	1
Concordant Upregulated genes:104	Glycosyl Compound Metabolic Process (GO)	0.245705	3.63529	1
Concordant Upregulated genes:104	Maternal Process Involved in Female Pregnancy (GO)	0.245705	3.63529	1
Concordant Upregulated genes:104	Collagen Degradation (Re)	0.245705	3.63529	1
Concordant Upregulated genes:104	Epithelial Cell Differentiation (GO)	0.245732	1.52358	1
Concordant Upregulated genes:104	Calcium Mediated Signaling (GO)	0.24615	2.14153	1
discordant genes:97	Neurotransmitter Receptors and Postsynaptic Signal Transmission (Re)	0.246154	2.14068	1
discordant genes:97	Intra Golgi and Retrograde Golgi to ER Traffic (Re)	0.246154	2.14068	1
Concordant Upregulated genes:104	Pos. Reg. of Cell Cycle (GO)	0.247409	1.77787	1
Concordant Upregulated genes:104	Reg. of Protein Modification By Small Protein Conjugation or Removal (GO)	0.247828	2.13115	1
Concordant Upregulated genes:104	Drug Transport (GO)	0.247828	2.13115	1
discordant genes:97	Mitotic Metaphase and Anaphase (Re)	0.247915	2.1298	1
Concordant Upregulated genes:104	Retinol Metabolism (KG)	0.249133	3.57659	1
Concordant Upregulated genes:104	Colorectal Cancer (KG)	0.249133	3.57659	1
Concordant Upregulated genes:104	NCAM Signaling For Neurite Out Growth (Re)	0.249133	3.57659	1
Concordant Upregulated genes:104	Reg. of Histone Methylation (GO)	0.249133	3.57659	1
Concordant Upregulated genes:104	Reg. of Immunoglobulin Production (GO)	0.249133	3.57659	1
Concordant Upregulated genes:104	Reg. of Cellular Amino Acid Metabolic Process (GO)	0.249133	3.57659	1
Concordant Upregulated genes:104	Response to Activity (GO)	0.249133	3.57659	1
Concordant Upregulated genes:104	Ca2plus Pathway (Re)	0.249133	3.57659	1
discordant genes:97	NOD Like Receptor Signaling Pathway (KG)	0.24914	3.57712	1
discordant genes:97	Apical Junction Assembly (GO)	0.24914	3.57712	1
discordant genes:97	Protein Localization to Cell Surface (GO)	0.24914	3.57712	1
discordant genes:97	Heterotypic Cell Cell Adhesion (GO)	0.24914	3.57712	1
discordant genes:97	Sumoylation of Chromatin Organization Proteins (Re)	0.24914	3.57712	1
concordant Downregulated genes:28	Cell Growth (GO)	0.249631	3.78736	1
discordant genes:97	Insulin Secretion (GO)	0.249677	2.11902	1
Concordant Upregulated genes:104	Multi Organism Reproductive Process (GO)	0.251868	1.44672	1
Concordant Upregulated genes:104	Demethylation (GO)	0.252547	3.51902	1
Concordant Upregulated genes:104	Neg. Reg. of Epithelial Cell Migration (GO)	0.252547	3.51902	1
Concordant Upregulated genes:104	Primary Alcohol Metabolic Process (GO)	0.252547	3.51902	1
discordant genes:97	Phenol Containing Compound Metabolic Process (GO)	0.252723	3.51671	1
discordant genes:97	Embryonic Digit Morphogenesis (GO)	0.252723	3.51671	1
discordant genes:97	Cellular Iron Ion Homeostasis (GO)	0.252723	3.51671	1
discordant genes:97	Cytoplasmic Pattern Recognition Receptor Signaling Pathway (GO)	0.252723	3.51671	1
discordant genes:97	Cytosolic Sensors of Pathogen Associated DNA (Re)	0.252723	3.51671	1
discordant genes:97	Pos. Reg. of Intracellular Transport (GO)	0.253202	2.0978	1
Concordant Upregulated genes:104	Adaptive Immune Response (GO)	0.253486	1.75409	1
discordant genes:97	Reg. of Binding (GO)	0.255221	1.74645	1
Concordant Upregulated genes:104	Lysophospholipid Pathway (PI)	0.255945	3.46404	1
Concordant Upregulated genes:104	Protein Autoubiquitination (GO)	0.255945	3.46404	1
Concordant Upregulated genes:104	Cranial Skeletal System Development (GO)	0.255945	3.46404	1
Concordant Upregulated genes:104	Neg. Reg. of Hormone Secretion (GO)	0.255945	3.46404	1
Concordant Upregulated genes:104	Pos. Reg. of Tyrosine Phosphorylation of STAT Protein (GO)	0.255945	3.46404	1
Concordant Upregulated genes:104	FOXO Mediated Transcription (Re)	0.255945	3.46404	1
Concordant Upregulated genes:104	G Alpha Q Signalling Events (Re)	0.256223	2.08075	1
discordant genes:97	BCR 5pathway (PI)	0.25629	3.45908	1
discordant genes:97	AR Pathway (PI)	0.25629	3.45908	1
discordant genes:97	Protein Transmembrane Transport (GO)	0.25629	3.45908	1
discordant genes:97	Collagen Degradation (Re)	0.25629	3.45908	1
concordant Downregulated genes:28	Reg. of Cell Morphogenesis (GO)	0.256797	3.66249	1
discordant genes:97	Ossification (GO)	0.257782	1.73673	1
Concordant Upregulated genes:104	Glioma (KG)	0.259328	3.41063	1
Concordant Upregulated genes:104	Integrin1 Pathway (PI)	0.259328	3.41063	1
Concordant Upregulated genes:104	Protein Monoubiquitination (GO)	0.259328	3.41063	1
discordant genes:97	Colorectal Cancer (KG)	0.259839	3.40315	1
discordant genes:97	Reg. of Histone Methylation (GO)	0.259839	3.40315	1
discordant genes:97	Reg. of Immunoglobulin Production (GO)	0.259839	3.40315	1
discordant genes:97	Reg. of Alpha Beta T-Cell Differentiation (GO)	0.259839	3.40315	1
discordant genes:97	Striated Muscle Cell Proliferation (GO)	0.259839	3.40315	1
discordant genes:97	Ca2plus Pathway (Re)	0.259839	3.40315	1
Concordant Upregulated genes:104	Double Strand Break Repair (GO)	0.261263	2.05163	1
Concordant Upregulated genes:104	Telomerase Pathway (PI)	0.262695	3.35877	1
Concordant Upregulated genes:104	Membrane Invagination (GO)	0.262695	3.35877	1
Concordant Upregulated genes:104	Neg. Reg. of Ossification (GO)	0.262695	3.35877	1
Concordant Upregulated genes:104	Skeletal Muscle Cell Differentiation (GO)	0.262695	3.35877	1
Concordant Upregulated genes:104	Antigen Processing and Presentation (GO)	0.262944	2.04198	1
discordant genes:97	HDAC Classi Pathway (PI)	0.263372	3.34894	1
[truncated: 11,772 more rows]

## Sheet: C
Multiple disease trait analysis of RE2C detected DGEs in SCZ vs Control dopa neurons FDR < 0.05
VARIABLE	gwasTrait	gwas acronym	BETA	BETA_STD	SE	P
discordant genes:97	ADHD	ADHD	0.13392	0.0090215	0.10312	0.097027
Concordant Upregulated genes:104	ADHD	ADHD	0.12681	0.0082916	0.10177	0.10639
concordant Downregulated genes:28	ADHD	ADHD	-0.025698	-0.00059149	0.29723	0.53445
Concordant Upregulated genes:104	Amyotrophic lateral sclerosis	ALS	0.074079	0.0048201	0.095037	0.21786
discordant genes:97	Amyotrophic lateral sclerosis	ALS	-0.091513	-0.0061347	0.10222	0.81467
concordant Downregulated genes:28	Amyotrophic lateral sclerosis	ALS	-0.29267	-0.0067036	0.26333	0.8668
concordant Downregulated genes:28	Bipolar Disorder	BD	0.20834	0.0048142	0.30541	0.24758
discordant genes:97	Bipolar Disorder	BD	-0.022725	-0.0015279	0.11013	0.58174
Concordant Upregulated genes:104	Bipolar Disorder	BD	-0.056382	-0.0036781	0.1073	0.70036
discordant genes:97	Bipolar Disorder type I	BD I	0.22971	0.015416	0.11129	0.019511
concordant Downregulated genes:28	Bipolar Disorder type I	BD I	0.48942	0.011288	0.3113	0.057965
Concordant Upregulated genes:104	Bipolar Disorder type I	BD I	-0.31334	-0.02053	0.10856	0.99805
Concordant Upregulated genes:104	Bipolar Disorder type II	BD II	-0.021015	-0.0013763	0.091504	0.59082
concordant Downregulated genes:28	Bipolar Disorder type II	BD II	-0.085425	-0.0019695	0.25709	0.63016
discordant genes:97	Bipolar Disorder type II	BD II	-0.057558	-0.0038611	0.095077	0.72754
discordant genes:97	Coronary Artery Disease	CAD	0.40015	0.026872	0.10795	0.00010533
Concordant Upregulated genes:104	Coronary Artery Disease	CAD	0.15983	0.010414	0.11019	0.073459
concordant Downregulated genes:28	Coronary Artery Disease	CAD	-0.26946	-0.0062191	0.33173	0.79168
discordant genes:97	Crohn's Disease	CD	-0.0057237	-0.00038521	0.107	0.52133
Concordant Upregulated genes:104	Crohn's Disease	CD	-0.051359	-0.0033538	0.107	0.68438
concordant Downregulated genes:28	Crohn's Disease	CD	-0.16024	-0.0037065	0.33342	0.68459
Concordant Upregulated genes:104	Height	Height	0.23773	0.015503	0.14587	0.05159
discordant genes:97	Height	Height	0.077435	0.0052349	0.14169	0.29236
concordant Downregulated genes:28	Height	Height	-0.60808	-0.014046	0.48166	0.8966
concordant Downregulated genes:28	Inflammatory Bowel Disease	IBD	0.4631	0.010713	0.37186	0.10651
Concordant Upregulated genes:104	Inflammatory Bowel Disease	IBD	0.0097798	0.00063869	0.10958	0.46444
discordant genes:97	Inflammatory Bowel Disease	IBD	-0.090029	-0.0060596	0.11498	0.78319
concordant Downregulated genes:28	Major Depressive Disorder	MDD	0.10171	0.0023486	0.31529	0.3735
discordant genes:97	Major Depressive Disorder	MDD	0.014579	0.00097376	0.12002	0.45166
Concordant Upregulated genes:104	Major Depressive Disorder	MDD	-0.16607	-0.010826	0.11291	0.92931
Concordant Upregulated genes:104	Multiple Sclerosis	MS	0.18433	0.012015	0.11467	0.05398
concordant Downregulated genes:28	Multiple Sclerosis	MS	-0.30502	-0.0069987	0.38369	0.78667
discordant genes:97	Multiple Sclerosis	MS	-0.13695	-0.0091967	0.12276	0.86769
discordant genes:97	Parkinson Disease	PD	0.18084	0.01217	0.1195	0.065122
concordant Downregulated genes:28	Parkinson Disease	PD	-0.10444	-0.0024015	0.32855	0.62471
Concordant Upregulated genes:104	Parkinson Disease	PD	-0.10087	-0.0065888	0.1081	0.82461
concordant Downregulated genes:28	Rheumatoid Arthritis	RA	0.22888	0.0052847	0.27615	0.20361
discordant genes:97	Rheumatoid Arthritis	RA	0.059622	0.0040055	0.10985	0.29365
Concordant Upregulated genes:104	Rheumatoid Arthritis	RA	-0.079408	-0.0051761	0.10176	0.78241
discordant genes:97	Schizophrenia 3	SCZ	0.15732	0.010579	0.12926	0.11181
concordant Downregulated genes:28	Schizophrenia 3	SCZ	0.34358	0.0078941	0.41914	0.20619
Concordant Upregulated genes:104	Schizophrenia 3	SCZ	-0.24324	-0.015876	0.12406	0.97503
Concordant Upregulated genes:104	Ulcerative Colitis	UC	0.17735	0.011579	0.1055	0.046381
concordant Downregulated genes:28	Ulcerative Colitis	UC	0.4801	0.011103	0.35433	0.087727
discordant genes:97	Ulcerative Colitis	UC	-0.045609	-0.0030689	0.10862	0.66272

## Sheet: D
Pathways of RE2C detected Discordant genes which are inside TADs
GO_Biological_Process_2023.Term	GO_Biological_Process_2023.Genes	GO_Biological_Process_2023.Overlap	GO_Biological_Process_2023.P.value	GO_Biological_Process_2023.Adjusted.P.value	GO_Biological_Process_2023.Old.P.value	GO_Biological_Process_2023.Old.Adjusted.P.value	GO_Biological_Process_2023.Odds.Ratio	GO_Biological_Process_2023.Combined.Score
Neuron Projection Morphogenesis (GO:0048812)	CNTNAP2;CTNND2;ANK3;BAIAP2	4/146	2.16604e-05	0.00669305	0	0	29.407	315.832
Axonogenesis (GO:0007409)	AUTS2;NRXN1;ANK3;BAIAP2	4/188	5.82161e-05	0.00899439	0	0	22.6465	220.833
Synapse Organization (GO:0050808)	CTNND2;NRXN1;ANK3	3/131	0.000441875	0.0455131	0	0	23.2605	179.676

## Sheet: E
Pathways of RE2C detected concordant downregulated genes that are inside tads
GO_Biological_Process_2023.Term	GO_Biological_Process_2023.Genes	GO_Biological_Process_2023.Overlap	GO_Biological_Process_2023.P.value	GO_Biological_Process_2023.Adjusted.P.value	GO_Biological_Process_2023.Old.P.value	GO_Biological_Process_2023.Old.Adjusted.P.value	GO_Biological_Process_2023.Odds.Ratio	GO_Biological_Process_2023.Combined.Score
Neuron Fate Specification (GO:0048665)	MYT1L	2024-01-07	0.00139934	0.0152803	0	0	1110.56	7298.3
Membrane Repolarization During Action Potential (GO:0086011)	KCNH7	2024-01-15	0.0029968	0.0152803	0	0	475.762	2764.28
Membrane Repolarization (GO:0086009)	KCNH7	2024-01-18	0.00359536	0.0152803	0	0	391.745	2204.79
Neuron Fate Commitment (GO:0048663)	MYT1L	2024-01-18	0.00359536	0.0152803	0	0	391.745	2204.79
Action Potential (GO:0001508)	KCNH7	1935-01-01	0.00698209	0.0237391	0	0	195.706	971.564

## Sheet: F
RE2C detected concordant upregulated genes that are inside tads
GO_Biological_Process_2023.Term	GO_Biological_Process_2023.Genes	GO_Biological_Process_2023.P.value	GO_Biological_Process_2023.Adjusted.P.value
Regulation Of Stress Fiber Assembly (GO:0051492)	CCN2;WASF2	0.000287854	0.0162637
Regulation Of Plasma Membrane Bounded Cell Projection Assembly (GO:0120032)	P2RX4;MYO10	0.000287854	0.0162637
Adenylate Cyclase-Modulating G Protein-Coupled Receptor Signaling Pathway (GO:0007188)	ADGRL4;WASF2	0.00134959	0.0221046
Positive Regulation Of ERK1 And ERK2 Cascade (GO:0070374)	CCN2;ROR2	0.0016241	0.0221046
Positive Regulation Of Microglial Cell Migration (GO:1904141)	P2RX4	0.00174892	0.0221046
Plasma Membrane Raft Organization (GO:0044857)	COLEC12	0.00174892	0.0221046
Positive Regulation Of Icosanoid Secretion (GO:0032305)	P2RX4	0.00209839	0.0221046
Regulation Of Microglial Cell Migration (GO:1904139)	P2RX4	0.00209839	0.0221046
Positive Regulation Of Glial Cell Migration (GO:1903977)	P2RX4	0.00244775	0.0221046
Negative Regulation Of Muscle Hypertrophy (GO:0014741)	P2RX4	0.00244775	0.0221046
Positive Regulation Of Arp2/3 Complex-Mediated Actin Nucleation (GO:2000601)	WASF2	0.00244775	0.0221046
Positive Regulation Of Calcium Ion Transport Into Cytosol (GO:0010524)	P2RX4	0.00279702	0.0221046
Regulation Of ERK1 And ERK2 Cascade (GO:0070372)	CCN2;ROR2	0.00298961	0.0221046
Positive Regulation Of Actin Nucleation (GO:0051127)	WASF2	0.00349522	0.0221046
Relaxation Of Cardiac Muscle (GO:0055119)	P2RX4	0.00419302	0.0221046
Positive Regulation Of Calcium-Mediated Signaling (GO:0050850)	P2RX4	0.00419302	0.0221046
Negative Regulation Of Cardiac Muscle Hypertrophy (GO:0010614)	P2RX4	0.00419302	0.0221046
Relaxation Of Muscle (GO:0090075)	P2RX4	0.00454175	0.0221046
Membrane Depolarization (GO:0051899)	P2RX4	0.00454175	0.0221046
Positive Regulation Of MAPK Cascade (GO:0043410)	CCN2;ROR2	0.00477684	0.0221046
Regulation Of Endothelial Cell Chemotaxis (GO:2001026)	P2RX4	0.00489039	0.0221046
Membrane Raft Organization (GO:0031579)	COLEC12	0.00489039	0.0221046
Cellular Response To ATP (GO:0071318)	P2RX4	0.00489039	0.0221046
Cellular Response To Exogenous dsRNA (GO:0071360)	COLEC12	0.00489039	0.0221046
Positive Regulation Of Endothelial Cell Chemotaxis (GO:2001028)	P2RX4	0.00489039	0.0221046
Cellular Response To Zinc Ion (GO:0071294)	P2RX4	0.00523892	0.0227691
Cellular Response To dsRNA (GO:0071359)	COLEC12	0.00593566	0.0236693
Response To Axon Injury (GO:0048678)	P2RX4	0.00628388	0.0236693
Response To Organophosphorus (GO:0046683)	P2RX4	0.00628388	0.0236693
Positive Regulation Of Macrophage Migration (GO:1905523)	P2RX4	0.00628388	0.0236693
Response To ATP (GO:0033198)	P2RX4	0.00698	0.0246481
Sensory Perception Of Pain (GO:0019233)	P2RX4	0.00698	0.0246481
Cytoskeleton-Dependent Intracellular Transport (GO:0030705)	MYO10	0.0076757	0.0251349
Positive Regulation Of Lamellipodium Assembly (GO:0010592)	WASF2	0.00802339	0.0251349
Regulation Of Cardiac Muscle Hypertrophy (GO:0010611)	P2RX4	0.00802339	0.0251349
Regulation Of Ruffle Assembly (GO:1900027)	P2RX4	0.00837098	0.0251349
Response To Purine-Containing Compound (GO:0014074)	P2RX4	0.00837098	0.0251349
Negative Regulation Of Stress Fiber Assembly (GO:0051497)	WASF2	0.00871846	0.0251349
Response To Zinc Ion (GO:0010043)	P2RX4	0.00871846	0.0251349
Positive Regulation Of Nitric Oxide Biosynthetic Process (GO:0045429)	P2RX4	0.00941312	0.0251349
Regulation Of Chemotaxis (GO:0050920)	P2RX4	0.00976029	0.0251349
Negative Regulation Of Actin Filament Bundle Assembly (GO:0032232)	WASF2	0.00976029	0.0251349
Positive Regulation Of Nitric Oxide Metabolic Process (GO:1904407)	P2RX4	0.00976029	0.0251349
Positive Regulation Of Calcium Ion Transport (GO:0051928)	P2RX4	0.0101074	0.0251349
Regulation Of Striated Muscle Contraction (GO:0006942)	P2RX4	0.0101074	0.0251349
Regulation Of Calcium-Mediated Signaling (GO:0050848)	P2RX4	0.0104543	0.0251349
Regulation Of Arp2/3 Complex-Mediated Actin Nucleation (GO:0034315)	WASF2	0.0104543	0.0251349
Positive Regulation Of Lamellipodium Organization (GO:1902745)	WASF2	0.0108012	0.0254278
Regulation Of Lamellipodium Assembly (GO:0010591)	WASF2	0.0114946	0.0259848
Regulation Of Metal Ion Transport (GO:0010959)	P2RX4	0.0118411	0.0259848
Response To Exogenous dsRNA (GO:0043330)	COLEC12	0.0121876	0.0259848
Regulation Of Sodium Ion Transport (GO:0002028)	P2RX4	0.0121876	0.0259848
Regulation Of Cardiac Muscle Contraction (GO:0055117)	P2RX4	0.0121876	0.0259848
Positive Regulation Of Intracellular Signal Transduction (GO:1902533)	P2RX4;ROR2	0.0132325	0.0276903
Regulation Of Nitric Oxide Biosynthetic Process (GO:0045428)	P2RX4	0.0135723	0.0278849
Positive Regulation Of Monoatomic Ion Transport (GO:0043270)	P2RX4	0.0139182	0.028085
Positive Regulation Of Calcium Ion Transmembrane Transport (GO:1904427)	P2RX4	0.0146098	0.0286433
Positive Regulation Of Stress Fiber Assembly (GO:0051496)	CCN2	0.0149554	0.0286433
Regulation Of Filopodium Assembly (GO:0051489)	MYO10	0.0149554	0.0286433
Positive Regulation Of Chemotaxis (GO:0050921)	P2RX4	0.0153009	0.0288167
Positive Regulation Of Blood Vessel Endothelial Cell Migration (GO:0043536)	P2RX4	0.0159916	0.0296238
Positive Regulation Of Actin Filament Bundle Assembly (GO:0032233)	CCN2	0.0177165	0.0317773
Sensory Perception (GO:0007600)	P2RX4	0.0177165	0.0317773
Regulation Of Blood Vessel Endothelial Cell Migration (GO:0043535)	P2RX4	0.0187502	0.0331059
Regulation Of Calcium Ion Transport (GO:0051924)	P2RX4	0.019783	0.034392
Regulation Of Cell Death (GO:0010941)	CCN2	0.020471	0.0350489
Negative Regulation Of Cell Death (GO:0060548)	CCN2	0.0221892	0.0374236
Positive Regulation Of Phosphatidylinositol 3-Kinase Signaling (GO:0014068)	ROR2	0.0239049	0.0391485
Regulation Of Heart Contraction (GO:0008016)	P2RX4	0.0239049	0.0391485
Plasma Membrane Organization (GO:0007009)	COLEC12	0.024933	0.0396685
Second-Messenger-Mediated Signaling (GO:0019932)	P2RX4	0.024933	0.0396685
Positive Regulation Of Secretion By Cell (GO:1903532)	P2RX4	0.0252755	0.0396685
Positive Regulation Of JNK Cascade (GO:0046330)	CCN2	0.0266445	0.0412442
Calcium Ion Transmembrane Transport (GO:0070588)	P2RX4	0.0276702	0.0422531
Epidermis Development (GO:0008544)	CCN2	0.0293775	0.0425598
Calcium-Mediated Signaling (GO:0019722)	P2RX4	0.0293775	0.0425598
Regulation Of Kinase Activity (GO:0043549)	ROR2	0.0293775	0.0425598
Positive Regulation Of Endothelial Cell Migration (GO:0010595)	P2RX4	0.0293775	0.0425598
Positive Regulation Of Plasma Membrane Bounded Cell Projection Assembly (GO:0120034)	WASF2	0.0304007	0.0433618
Sensory Perception Of Mechanical Stimulus (GO:0050954)	P2RX4	0.0307416	0.0433618
Regulation Of Phosphatidylinositol 3-Kinase Signaling (GO:0014066)	ROR2	0.0310823	0.0433618
Positive Regulation Of Neuron Projection Development (GO:0010976)	ROR2	0.0317635	0.0437078
Positive Regulation Of Protein Kinase B Signaling (GO:0051897)	P2RX4	0.032104	0.0437078
Positive Regulation Of Kinase Activity (GO:0033674)	ROR2	0.0358421	0.0475406
Positive Regulation Of Stress-Activated MAPK Cascade (GO:0032874)	CCN2	0.0361814	0.0475406
Cellular Response To Organonitrogen Compound (GO:0071417)	P2RX4	0.0361814	0.0475406
Cellular Response To Salt (GO:1902075)	P2RX4	0.0375372	0.0480897
Regulation Of JNK Cascade (GO:0046328)	CCN2	0.0378759	0.0480897
Adenylate Cyclase-Activating G Protein-Coupled Receptor Signaling Pathway (GO:0007189)	ADGRL4	0.0378759	0.0480897
Calcium Ion Transport (GO:0006816)	P2RX4	0.038553	0.0484055

## Sheet: G
Number of TADs in each discordant genes
geneID	number of tads	category	gene_name
ENSG00000005339	1	Discordant	CREBBP
ENSG00000006607	1	Discordant	FARP2
ENSG00000038382	1	Discordant	TRIO
ENSG00000049759	1	Discordant	NEDD4L
ENSG00000064692	1	Discordant	SNCAIP
ENSG00000067955	1	Discordant	CBFB
ENSG00000072274	1	Discordant	TFRC
ENSG00000085982	1	Discordant	USP40
ENSG00000102786	1	Discordant	INTS6
ENSG00000103091	1	Discordant	WDR59
ENSG00000106617	1	Discordant	PRKAG2
ENSG00000109381	1	Discordant	ELF2
ENSG00000110080	1	Discordant	ST3GAL4
ENSG00000110274	1	Discordant	CEP164
ENSG00000110651	1	Discordant	CD81
ENSG00000110841	1	Discordant	PPFIBP1
ENSG00000115652	1	Discordant	UXS1
ENSG00000120265	1	Discordant	PCMT1
ENSG00000128656	1	Discordant	CHN1
ENSG00000129657	1	Discordant	SEC14L1
ENSG00000131626	1	Discordant	PPFIA1
ENSG00000137171	1	Discordant	KLC4
ENSG00000140022	1	Discordant	STON2
ENSG00000141837	1	Discordant	CACNA1A
ENSG00000144560	1	Discordant	VGLL4
ENSG00000144619	1	Discordant	CNTN4
ENSG00000148935	1	Discordant	GAS2
ENSG00000150995	1	Discordant	ITPR1
ENSG00000151491	1	Discordant	EPS8
ENSG00000152767	1	Discordant	FARP1
ENSG00000153914	1	Discordant	SREK1
ENSG00000157837	1	Discordant	SPPL3
ENSG00000159023	1	Discordant	EPB41
ENSG00000163075	1	Discordant	CFAP221
ENSG00000164300	1	Discordant	SERINC5
ENSG00000166387	1	Discordant	PPFIBP2
ENSG00000166444	1	Discordant	ST5
ENSG00000167460	1	Discordant	TPM4
ENSG00000170873	1	Discordant	MTSS1
ENSG00000178209	1	Discordant	PLEC
ENSG00000181090	1	Discordant	EHMT1
ENSG00000184428	1	Discordant	TOP1MT
ENSG00000187498	1	Discordant	COL4A1
ENSG00000189079	1	Discordant	ARID2
ENSG00000196628	1	Discordant	TCF4
ENSG00000196872	1	Discordant	KIAA1211L
ENSG00000197694	1	Discordant	SPTAN1
ENSG00000198373	1	Discordant	WWP2
ENSG00000198838	1	Discordant	RYR3
ENSG00000204406	1	Discordant	MBD5
ENSG00000204628	1	Discordant	RACK1
ENSG00000206561	1	Discordant	COLQ
ENSG00000228113	1	Discordant	AC003991.1
ENSG00000244627	1	Discordant	TPTEP2
ENSG00000277072	1	Discordant	STAG3L2
ENSG00000025796	2	Discordant	SEC63
ENSG00000075043	2	Discordant	KCNQ2
ENSG00000080503	2	Discordant	SMARCA2
ENSG00000101266	2	Discordant	CSNK2A1
ENSG00000140262	2	Discordant	TCF12
ENSG00000151150	2	Discordant	ANK3
ENSG00000156931	2	Discordant	VPS8
ENSG00000164199	2	Discordant	ADGRV1
ENSG00000173575	2	Discordant	CHD2
ENSG00000175866	2	Discordant	BAIAP2
ENSG00000176853	2	Discordant	FAM91A1
ENSG00000178104	2	Discordant	PDE4DIP
ENSG00000179818	2	Discordant	PCBP1-AS1
ENSG00000197102	2	Discordant	DYNC1H1
ENSG00000227036	2	Discordant	LINC00511
ENSG00000243156	2	Discordant	MICAL3
ENSG00000249859	2	Discordant	PVT1
ENSG00000285219	2	Discordant	AL591485.1
ENSG00000109339	3	Discordant	MAPK10
ENSG00000114861	3	Discordant	FOXP1
ENSG00000139173	3	Discordant	TMEM117
ENSG00000158321	3	Discordant	AUTS2
ENSG00000162105	3	Discordant	SHANK2
ENSG00000169862	3	Discordant	CTNND2
ENSG00000259905	3	Discordant	PWRN1
ENSG00000179915	4	Discordant	NRXN1
ENSG00000242808	4	Discordant	SOX2-OT
ENSG00000174469	5	Discordant	CNTNAP2

## Sheet: H
Number of TADs in each concordant downregulated genes
geneID	number of tads	category	gene_name
ENSG00000156097	1	Concordant Down	GPR61
ENSG00000166171	1	Concordant Down	DPCD
ENSG00000175264	1	Concordant Down	CHST1
ENSG00000177350	1	Concordant Down	RPL13AP3
ENSG00000181215	2	Concordant Down	C4orf50
ENSG00000183098	2	Concordant Down	GPC6
ENSG00000184156	1	Concordant Down	KCNQ3
ENSG00000184611	1	Concordant Down	KCNH7
ENSG00000186487	4	Concordant Down	MYT1L
ENSG00000228222	1	Concordant Down	AC073050.1
ENSG00000236303	1	Concordant Down	LINC02646
ENSG00000237133	1	Concordant Down	AC020594.1
ENSG00000239481	1	Concordant Down	RPS3AP41
ENSG00000248008	1	Concordant Down	NRAV
ENSG00000250547	1	Concordant Down	AC079238.1
ENSG00000253848	1	Concordant Down	AC010834.2
ENSG00000255545	1	Concordant Down	AP004608.1
ENSG00000257057	1	Concordant Down	C11orf97
ENSG00000258399	2	Concordant Down	AL117190.1

## Sheet: I
Number of tads in each concordant genes
geneID	number of tads	category	gene_name
ENSG00000051523	1	Concordant UP	CYBA
ENSG00000077942	1	Concordant UP	FBLN1
ENSG00000080345	2	Concordant UP	RIF1
ENSG00000085265	1	Concordant UP	FCN1
ENSG00000090376	1	Concordant UP	IRAK3
ENSG00000090554	1	Concordant UP	FLT3LG
ENSG00000104689	1	Concordant UP	TNFRSF10A
ENSG00000105137	1	Concordant UP	SYDE1
ENSG00000105971	1	Concordant UP	CAV2
ENSG00000107438	1	Concordant UP	PDLIM1
ENSG00000108622	1	Concordant UP	ICAM2
ENSG00000113140	1	Concordant UP	SPARC
ENSG00000116016	1	Concordant UP	EPAS1
ENSG00000117151	1	Concordant UP	CTBS
ENSG00000118523	1	Concordant UP	CCN2
ENSG00000119004	1	Concordant UP	CYP20A1
ENSG00000119681	1	Concordant UP	LTBP2
ENSG00000119699	1	Concordant UP	TGFB3
ENSG00000124067	1	Concordant UP	SLC12A4
ENSG00000124440	1	Concordant UP	HIF3A
ENSG00000125810	1	Concordant UP	CD93
ENSG00000127920	1	Concordant UP	GNG11
ENSG00000131127	1	Concordant UP	ZNF141
ENSG00000132205	1	Concordant UP	EMILIN2
ENSG00000135124	1	Concordant UP	P2RX4
ENSG00000136378	1	Concordant UP	ADAMTS7
ENSG00000137834	1	Concordant UP	SMAD6
ENSG00000137962	1	Concordant UP	ARHGAP29
ENSG00000138119	1	Concordant UP	MYOF
ENSG00000140368	2	Concordant UP	PSTPIP1
ENSG00000142173	1	Concordant UP	COL6A2
ENSG00000145555	1	Concordant UP	MYO10
ENSG00000145623	1	Concordant UP	OSMR
ENSG00000146648	1	Concordant UP	EGFR
ENSG00000146872	2	Concordant UP	TLK2
ENSG00000148426	1	Concordant UP	PROSER2
ENSG00000150907	1	Concordant UP	FOXO1
ENSG00000151012	1	Concordant UP	SLC7A11
ENSG00000157110	1	Concordant UP	RBPMS
ENSG00000158156	1	Concordant UP	XKR8
ENSG00000158195	1	Concordant UP	WASF2
ENSG00000158270	2	Concordant UP	COLEC12
ENSG00000160883	1	Concordant UP	HK3
ENSG00000162494	1	Concordant UP	LRRC38
ENSG00000162618	1	Concordant UP	ADGRL4
ENSG00000163131	1	Concordant UP	CTSS
ENSG00000163739	1	Concordant UP	CXCL1
ENSG00000163817	1	Concordant UP	SLC6A20
ENSG00000163840	1	Concordant UP	DTX3L
ENSG00000166068	1	Concordant UP	SPRED1
ENSG00000169071	2	Concordant UP	ROR2
ENSG00000172322	1	Concordant UP	CLEC12A
ENSG00000173530	1	Concordant UP	TNFRSF10D
ENSG00000173744	1	Concordant UP	AGFG1
ENSG00000175048	1	Concordant UP	ZDHHC14
ENSG00000177173	1	Concordant UP	NAP1L4P1
ENSG00000178803	1	Concordant UP	ADORA2A-AS1
ENSG00000179144	1	Concordant UP	GIMAP7
ENSG00000183963	1	Concordant UP	SMTN
ENSG00000185404	1	Concordant UP	SP140L
ENSG00000188783	1	Concordant UP	PRELP
ENSG00000196616	1	Concordant UP	ADH1B
ENSG00000197256	1	Concordant UP	KANK2
ENSG00000197329	1	Concordant UP	PELI1
ENSG00000205038	1	Concordant UP	PKHD1L1
ENSG00000213853	1	Concordant UP	EMP2
ENSG00000225630	1	Concordant UP	MTND2P28
ENSG00000228649	1	Concordant UP	SNHG26
ENSG00000230695	1	Concordant UP	AC012462.3
ENSG00000234626	1	Concordant UP	AL021937.3
ENSG00000237973	1	Concordant UP	MTCO1P12
ENSG00000239713	1	Concordant UP	APOBEC3G
ENSG00000240291	1	Concordant UP	AL450384.2
ENSG00000247627	1	Concordant UP	MTND4P12
ENSG00000248527	1	Concordant UP	MTATP6P1
ENSG00000255031	1	Concordant UP	AP002807.1
ENSG00000274995	1	Concordant UP	AC013564.1
ENSG00000279041	1	Concordant UP	AC102945.2
ENSG00000279637	1	Concordant UP	AC018445.3
ENSG00000284977	1	Concordant UP	AL160272.1
ENSG00000285280	2	Concordant UP	AL390957.1
ENSG00000285851	1	Concordant UP	AL359762.3

## Sheet: J
Multiple disease trait analysis of RE2C detected DGEs in SCZ vs Control dopa neurons FDR < 0.1
VARIABLE	gwasTrait	gwas acronym	BETA	BETA_STD	SE	P
RE2C downregulated	ADHD	ADHD	0.1961	0.010669	0.13078	0.066886
RE2C upregulated	ADHD	ADHD	0.091016	0.0072658	0.08341	0.1376
RE2C upregulated	Amyotrophic lateral sclerosis	ALS	0.045895	0.003646	0.08015	0.28346
RE2C downregulated	Amyotrophic lateral sclerosis	ALS	-0.18172	-0.0098378	0.12346	0.92947
RE2C downregulated	Bipolar Disorder	BD	0.060211	0.003259	0.13804	0.33136
RE2C upregulated	Bipolar Disorder	BD	-0.060261	-0.0048095	0.088482	0.75207
RE2C downregulated	Bipolar Disorder type I	BD I	0.3325	0.017964	0.13999	0.0087746
RE2C upregulated	Bipolar Disorder type I	BD I	-0.15969	-0.012774	0.089482	0.96283
RE2C downregulated	Bipolar Disorder type II	BD II	0.043922	0.0023719	0.12246	0.35993
RE2C upregulated	Bipolar Disorder type II	BD II	-0.073307	-0.0058616	0.074809	0.83643
RE2C upregulated	Coronary Artery Disease	CAD	0.24905	0.019854	0.089044	0.0025826
RE2C downregulated	Coronary Artery Disease	CAD	0.26382	0.014262	0.13913	0.028975
RE2C downregulated	Crohn's Disease	CD	-0.0035845	-0.00019421	0.13913	0.51028
RE2C upregulated	Crohn's Disease	CD	-0.04709	-0.003762	0.086854	0.70615
RE2C upregulated	Height	Height	0.22137	0.017662	0.1179	0.030232
RE2C downregulated	Height	Height	-0.11725	-0.0064012	0.18266	0.73952
RE2C upregulated	Inflammatory Bowel Disease	IBD	0.0095225	0.00076083	0.090607	0.45815
RE2C downregulated	Inflammatory Bowel Disease	IBD	-0.084898	-0.0046003	0.14933	0.71515
RE2C downregulated	Major Depressive Disorder	MDD	0.040013	0.0021643	0.14686	0.39264
RE2C upregulated	Major Depressive Disorder	MDD	-0.11492	-0.0091278	0.094587	0.88781
RE2C upregulated	Multiple Sclerosis	MS	0.14988	0.011927	0.09596	0.05917
RE2C downregulated	Multiple Sclerosis	MS	-0.32832	-0.017805	0.15642	0.98208
RE2C downregulated	Parkinson Disease	PD	0.1006	0.0054674	0.14438	0.24299
RE2C upregulated	Parkinson Disease	PD	-0.015047	-0.0012001	0.09237	0.5647
RE2C upregulated	Rheumatoid Arthritis	RA	0.0049888	0.00039784	0.085265	0.47667
RE2C downregulated	Rheumatoid Arthritis	RA	-0.007451	-0.00040298	0.13434	0.52211
RE2C downregulated	Schizophrenia 3	SCZ	0.11139	0.0060491	0.16378	0.24822
RE2C upregulated	Schizophrenia 3	SCZ	-0.0918	-0.0073153	0.10342	0.81263
RE2C upregulated	Ulcerative Colitis	UC	0.10517	0.0084	0.087074	0.11357
RE2C downregulated	Ulcerative Colitis	UC	0.039413	0.002135	0.13969	0.38892

[truncated: 1 more sheets: K]
