# Supplementary material for: Downregulated transcription in chromosomal domains of midbrain dopamine neurons linked to schizophrenia.
Source: Research Square preprint supplement (doi:10.21203/rs.3.rs-5354582/v1), 2024-11-08
Supplement: Supplementary file 5 [file de1415e6ffa6e13a20553ea6.xlsx]

## Sheet: Sheet2
Donor	Celltype	Dx	Number of Nuclei	QUBIT FINAL LIBRARY CONC. (NG/UL)	FINAL LIBRARY BP AVERAGE	PCR CYCLES	Date Completed	Vol	Pass/Fail Agilent HiC Library QC	Adapter	Sex	Total reads	Mapped	unmapped
Donor_1	Negative	Control	50000	21.8	413	10X	9.6.2019	20ul	PASS	6	XY	858027276	701576156	156451120
Donor_2	Negative	Control	50000	9.8	376	12X	9.24.2019	25uL	PASS	18		1296353856	1070917082	225436774
Donor_3	Negative	BD	50000	9.6	374	12X	9.24.2019	13.63	PASS	5	XY	693531788	561323594	132208194
Donor_4	Negative	BD	50000	13.3	413	14X	8.5.2019	42.5	PASS	6	XX	1580155394	1180442952	399712442
Donor_5	Negative	BD	50000	9.92	376	14X	8.21.2019	14	PASS	18	XY	1208545590	1064472012	144073578
Donor_6	Negative	Control	6010	2.42	371	12X	9.24.2019	17.2	PASS	14	XY	1957848564	1355720410	602128154
Donor_7	Negative	BD	50000	14.6	389	14X	9.27.2019	25uL	PASS	16	XY	1423016208	1011335586	411680622
Donor_8	Negative	Control	50000	25.6	422	14X	9.6.2019	20ul	PASS	4	XY	1658074052	1264838024	393236028
Donor_9	Negative	BD	50000	32.6	445	14X	9.6.2019	18.19	PASS	2	XY	661331346	584290463	77040883
Donor_10	Negative	BD	50000	12.6	384	12X	9.16.2019	25uL	PASS	6	XY	1057594330	710407758	347186572
Donor_11	Negative	BD	50000	16.3	375	12X	9.16.2019	14.97	PASS	2	XX	1546396566	1233759715	312636851
Donor_12	Negative	Control	50000	n/a	n/a	14X	3.8.2026	22ul	Pass	12	XX	1011391952	912528737	98863215
Donor_13	Negative	Control	50000	14.3	388	14X	9.27.2019	17.91	PASS	7	XY	1223075266	957900190	265175076
Donor_14	Negative	BD	50000		416	14X	11.6.2019	23ul	PASS	19	XX	901602516	818578552	83023964
Donor_15	Negative	BD	50000		352	14X	11.13.2019	23ul	PASS	13*	XX	1052792380	881358514	171433866
Donor_16	Negative	Control	50000		316	14X	12.24.2019	23ul	PASS	6	XY	163456188	144897684	18558504
Donor_17	Negative	Control	50000	5.44	367	14X	8.21.2019	12.5	PASS	15	XY	1227032694	1072293215	154739479
Donor_18	Positive	Control	50000	12.3	402	12X	9.16.2019	13.51	PASS	19	XX	675724710	525993774	149730936
Donor_19	Positive	Bipolar	50000	16.8	429	14X	9.6.2019	18.23	PASS	16	XY	1116002110	951947454	164054656
Donor_20	Positive	Bipolar	50000	5.26	376	12X	9.16.2019	25uL	PASS	13	XY	1223468350	916907015	306561335
Donor_21	Positive	Control	50000	14.7	419	14X	8.5.2019	14.4	PASS	12	XX	1435944754	1079387531	356557223
Donor_22	Positive	Bipolar	50000	7.64	412	14X	8.5.2019	43	PASS	5	XX	1092796580	815050126	277746454
Donor_23	Positive	control	50000	n/a	n/a	14X	3.8.2025	22ul	Pass	15	XY	2519868248	2283644078	236224170
Donor_24	Positive	Bipolar	50000	7.54	423	14X	9.6.2019	20ul	PASS	12	XY	1273222076	765214958	508007118
Donor_25	Positive	Bipolar	50000	0.478	439	14X	9.6.2019	20ul	PASS	5	XY	1226799902	957292152	269507750
Donor_26	Positive	Control	50000	n/a	n/a	14X	3.8.2023	22ul	Pass	2	XY	1622387994	1434374956	188013038
Donor_27	Positive	Bipolar	50000	5.58	392	12X	9.16.2019	25uL	PASS	14	XX	1240624642	1055698075	184926567
Donor_28	Positive	Bipolar	50000	11.2	395	12X	9.16.2019	11.92	PASS	7	XX	1285638778	1008566130	277072648
Donor_29	Positive	Control	50000	n/a	n/a	14X	3.8.2027	22ul	Pass	5	XX	597407444	518495581	78911863
Donor_30	Positive	Bipolar	50000	3.6	350	12X	9.24.2019	0.3	PASS	4	XY	905899306	728636437	177262869
Donor_31	Positive	Bipolar	50000		431	14X	11.6.2019	23ul	PASS	12	XX	921043780	749658009	171385771
Donor_32	Positive	Control	50000	18.2	406	14X	9.27.2019	25uL	PASS	12	XX	1410965472	1036521752	374443720
Donor_33	Positive	Control	50000	10.7	363	14X	9.27.2019	25uL	PASS	19	XX	764803492	566038476	198765016
Donor_34	Positive	Control	5336	2.9	360	14X	8.21.2019	12	PASS	7	XY	1200349468	935777968	264571500
